# Supplementary material for: Characterization of the Cartilage DNA Methylome in Knee and Hip Osteoarthritis
Source: PubMed Central journal article supplement — Arthritis Rheumatol. 2014 Aug 26;66(9):2450–60. doi: 10.1002/art.38713 (PMC4314681; doi:10.1002/art.38713), 2014-08-26
Supplement: art0066-2450-sd2.pdf [file art0066-2450-sd2.pdf]

Supplementary Table 3. DMLs identified between NOF and OA hip samples.

## Hypermethylated in Osteoarthritis

| Probe      | Gene         | CHR | adj.P-value | Mean $\beta$ -value<br>NOF | Mean $\beta$ -value<br>OA.Hip<br>samples |
|------------|--------------|-----|-------------|----------------------------|------------------------------------------|
| cg25710107 | A2LD1        | 13  | 0.024211344 | 0.338919552                | 0.483465798                              |
| cg13776095 | A2LD1;A2LD1  | 13  | 0.005558868 | 0.503828811                | 0.6233095                                |
| cg07431888 | ABAT;ABAT;AE | 16  | 0.001801364 | 0.447215952                | 0.560527972                              |
| cg06604249 | ABAT;ABAT;AE | 16  | 0.005736344 | 0.323381495                | 0.461758467                              |
| cg07372195 | ABCA5;ABCA5; | 17  | 0.016246651 | 0.613640907                | 0.732126344                              |
| cg00241432 | ABCC4;ABCC4  | 13  | 0.023003589 | 0.418094094                | 0.573381365                              |
| cg27243685 | ABCG1;ABCG1  | 21  | 0.001122543 | 0.520888398                | 0.644944346                              |
| cg25046274 | ABLIM2;ABLIV | 4   | 0.016695089 | 0.390874965                | 0.516148593                              |
| cg05633070 | ABR;ABR;ABR  | 17  | 0.002417693 | 0.438594034                | 0.571668987                              |
| cg04724319 | ABR;ABR;ABR  | 17  | 0.001006849 | 0.281265711                | 0.402898075                              |
| cg10370025 | ABR;ABR;ABR  | 17  | 0.041606855 | 0.196691618                | 0.30342455                               |
| cg10803453 | ABR;ABR;ABR  | 17  | 0.005677421 | 0.461352231                | 0.565335373                              |
| cg03131556 | ABR;ABR;ABR  | 17  | 0.000707562 | 0.233271248                | 0.336188557                              |
| cg01760189 | ACACA;ACACA  | 17  | 0.016840584 | 0.388525579                | 0.544621147                              |
| cg08931456 | ACAP2        | 3   | 0.014037334 | 0.452701345                | 0.565533217                              |
| cg19414302 | ACAP3        | 1   | 0.003785647 | 0.395501214                | 0.531590913                              |
| cg02506501 | ACAP3        | 1   | 0.022172169 | 0.61890423                 | 0.723486699                              |
| cg02583796 | ACBD3        | 1   | 0.006287503 | 0.517445472                | 0.636484709                              |
| cg08614334 | ACCN4;ACCN4  | 2   | 0.000949254 | 0.424939819                | 0.577054992                              |
| cg10710218 | ACOT11;ACOT  | 1   | 0.011770232 | 0.565956463                | 0.694474826                              |
| cg26869512 | ACOX3;ACOX3  | 4   | 0.007758229 | 0.421701426                | 0.602103567                              |
| cg24597207 | ACOX3;ACOX3  | 4   | 0.003707341 | 0.565785408                | 0.689467203                              |
| cg18038894 | ACSF2        | 17  | 2.25E-06    | 0.233991068                | 0.411561894                              |
| cg22002216 | ACSF2        | 17  | 0.005589823 | 0.401303262                | 0.504359761                              |
| cg15871766 | ACVR1B;ACVR  | 12  | 0.000907611 | 0.417701986                | 0.526422535                              |
| cg12845177 | ADAMTS10     | 19  | 0.021253833 | 0.514030287                | 0.648036258                              |
| cg08709863 | ADAMTS14;AC  | 10  | 0.034602099 | 0.53793513                 | 0.643527972                              |
| cg24368226 | ADAMTS17     | 15  | 8.75E-05    | 0.13803795                 | 0.285272743                              |
| cg17212277 | ADAMTS2;AD   | 5   | 0.008134325 | 0.474354319                | 0.58124893                               |
| cg06944693 | ADAMTS8      | 11  | 0.000452509 | 0.489106467                | 0.595809321                              |
| cg13468759 | ADAMTSL1;AD  | 9   | 0.03817897  | 0.355642084                | 0.510912183                              |
| cg16419019 | ADARB2       | 10  | 0.010827539 | 0.407039591                | 0.515019253                              |
| cg01397065 | ADAT3;SCAMP  | 19  | 0.008660745 | 0.268570614                | 0.418850778                              |
| cg19254118 | ADAT3;SCAMP  | 19  | 0.006082154 | 0.491003226                | 0.630933939                              |
| cg20243900 | ADAT3;SCAMP  | 19  | 0.01032549  | 0.455617539                | 0.585022143                              |
| cg00061520 | ADCY9        | 16  | 0.007387708 | 0.337581099                | 0.52500444                               |
| cg03532879 | ADIG         | 20  | 0.010744075 | 0.49459553                 | 0.616252795                              |
| cg01012879 | ADSS         | 1   | 0.013611736 | 0.681017322                | 0.790520991                              |
| cg21571135 | AFF1;AFF1    | 4   | 1.00E-04    | 0.555169207                | 0.698454296                              |

|            |              |    |             |             |             |
|------------|--------------|----|-------------|-------------|-------------|
| cg17875845 | AFF1;AFF1    | 4  | 0.033123194 | 0.35701524  | 0.486945251 |
| cg07164047 | AGAP1;AGAP1  | 2  | 0.003770448 | 0.438962226 | 0.561631245 |
| cg12859101 | AGPAT6       | 8  | 0.027579388 | 0.440159327 | 0.543672429 |
| cg06483820 | AKAP1        | 17 | 0.013516259 | 0.477214306 | 0.602457276 |
| cg21156756 | AKAP6        | 14 | 0.000642263 | 0.713779    | 0.841219285 |
| cg26824516 | ALDH1A3      | 15 | 6.42E-05    | 0.231078205 | 0.349554962 |
| cg11542394 | ALDH1A3      | 15 | 0.009303791 | 0.627888092 | 0.7399852   |
| cg10504066 | ALDH1A3      | 15 | 0.005979699 | 0.483791435 | 0.592725581 |
| cg23191950 | ALDH1A3      | 15 | 0.042365302 | 0.399996353 | 0.500845642 |
| cg12491555 | ALDH8A1;ALDI | 6  | 0.016532882 | 0.219751325 | 0.348334982 |
| cg09795087 | ALG14        | 1  | 0.002711637 | 0.293226601 | 0.399353102 |
| cg10888461 | ALPK1;ALPK1  | 4  | 0.003120092 | 0.351066168 | 0.504513549 |
| cg03364781 | ALPK1;ALPK1  | 4  | 0.005228749 | 0.579786617 | 0.693678206 |
| cg27614534 | ALPK2        | 18 | 0.000749526 | 0.532947347 | 0.656304562 |
| cg00031779 | ALPK2        | 18 | 0.038952059 | 0.283476317 | 0.394656901 |
| cg00061629 | ALX4         | 11 | 0.00019509  | 0.389250349 | 0.541297702 |
| cg20406747 | AMHR2;AMHR   | 12 | 0.036518812 | 0.203459381 | 0.317564223 |
| cg18364120 | AMICA1       | 11 | 0.012248457 | 0.499023343 | 0.637352248 |
| cg09713896 | AMOTL2       | 3  | 0.028965652 | 0.544380257 | 0.649607773 |
| cg22308970 | AMPH;AMPH    | 7  | 0.006638611 | 0.451095407 | 0.572958993 |
| cg07677598 | ANK2         | 4  | 0.04774186  | 0.418330859 | 0.542190324 |
| cg24332570 | ANK3         | 10 | 0.00056751  | 0.48961079  | 0.613131044 |
| cg12354377 | ANK3         | 10 | 0.003745012 | 0.545745714 | 0.646104064 |
| cg09486407 | ANKRD11      | 16 | 0.004337046 | 0.337111193 | 0.516823108 |
| cg02917156 | ANKRD11      | 16 | 0.001318156 | 0.477554594 | 0.607163599 |
| cg01543603 | ANKRD11      | 16 | 0.002235844 | 0.162983215 | 0.271466694 |
| cg01167578 | ANKRD11      | 16 | 0.005359893 | 0.334734294 | 0.437877421 |
| cg10343327 | ANKRD2;ANKR  | 10 | 0.003606401 | 0.390762496 | 0.530302753 |
| cg22889914 | ANKRD2;ANKR  | 10 | 0.00749051  | 0.383707319 | 0.522555472 |
| cg02950892 | ANKRD2;ANKR  | 10 | 0.009153227 | 0.284649455 | 0.399039892 |
| cg02538681 | ANKRD22      | 10 | 0.019861378 | 0.738769792 | 0.839923899 |
| cg12284836 | ANLN         | 7  | 0.012491319 | 0.397754149 | 0.53976705  |
| cg03613003 | ANO1;ANO1    | 11 | 0.01152239  | 0.233608623 | 0.370837103 |
| cg20883194 | ANO6;ANO6;A  | 12 | 0.047363799 | 0.115072737 | 0.222141508 |
| cg24192660 | ANO8         | 19 | 0.000239883 | 0.150746841 | 0.285971582 |
| cg12526923 | ANO8         | 19 | 0.001917807 | 0.215853603 | 0.341430876 |
| cg13042288 | ANPEP        | 15 | 0.006011049 | 0.544557964 | 0.691428644 |
| cg24530041 | ANPEP        | 15 | 0.03967596  | 0.343159592 | 0.454199979 |
| cg16326777 | ANTXR2       | 4  | 0.039023549 | 0.498790445 | 0.649908148 |
| cg03164800 | ANTXR2       | 4  | 0.006068642 | 0.424969845 | 0.567305191 |
| cg15892650 | ANXA6;ANXA6  | 5  | 0.000600748 | 0.283262626 | 0.398989684 |
| cg00390511 | AOAH         | 7  | 2.80E-05    | 0.364752347 | 0.528004413 |
| cg16858211 | AOAH         | 7  | 0.001585583 | 0.594396494 | 0.709191161 |
| cg27205902 | AP2A2        | 11 | 0.000817116 | 0.255207017 | 0.502842136 |
| cg14389139 | AP2A2        | 11 | 0.0034081   | 0.467801996 | 0.604911382 |
| cg15908627 | AP2A2        | 11 | 0.047759248 | 0.402779105 | 0.529148085 |

|            |               |    |             |             |             |
|------------|---------------|----|-------------|-------------|-------------|
| cg04880138 | AP2A2         | 11 | 0.000498735 | 0.229473439 | 0.337720031 |
| cg15989892 | APBB2;APBB2;  | 4  | 0.010348157 | 0.587560213 | 0.701244345 |
| cg17548735 | APOBEC2;APO   | 6  | 0.02444669  | 0.272755427 | 0.391757519 |
| cg24424889 | APOBEC3H;AP   | 22 | 0.001308222 | 0.354366306 | 0.495910066 |
| cg16546724 | ARCN1;ARCN1   | 11 | 0.003261043 | 0.48440036  | 0.641905803 |
| cg26282731 | ARHGAP10      | 4  | 0.001874089 | 0.114305671 | 0.258399319 |
| cg01381498 | ARHGAP10      | 4  | 0.01723909  | 0.253423348 | 0.379026719 |
| cg12058385 | ARHGAP15      | 2  | 5.01E-05    | 0.251015459 | 0.408697346 |
| cg17600630 | ARHGAP15      | 2  | 0.022552378 | 0.201578465 | 0.302110355 |
| cg14575356 | ARHGAP18      | 6  | 4.26E-05    | 0.114647251 | 0.269606446 |
| cg09023869 | ARHGAP22      | 10 | 0.00425592  | 0.412622654 | 0.519357869 |
| cg20784207 | ARHGAP24      | 4  | 0.000579568 | 0.338464952 | 0.516279932 |
| cg22062741 | ARHGEF10      | 8  | 5.15E-05    | 0.52861141  | 0.718471935 |
| cg20149022 | ARHGEF10      | 8  | 0.000282053 | 0.227240365 | 0.406354832 |
| cg03705571 | ARHGEF10      | 8  | 0.003388613 | 0.218385509 | 0.374941405 |
| cg01824603 | ARHGEF10      | 8  | 0.014921066 | 0.348086363 | 0.498183937 |
| cg06807837 | ARHGEF10      | 8  | 0.004411643 | 0.484693434 | 0.63476161  |
| cg22223001 | ARHGEF10      | 8  | 0.019659391 | 0.501679308 | 0.638447226 |
| cg07694735 | ARHGEF10      | 8  | 0.03204638  | 0.33900042  | 0.474780104 |
| cg22511775 | ARHGEF10      | 8  | 0.001233032 | 0.380111778 | 0.512452258 |
| cg21869174 | ARHGEF16      | 1  | 0.001658877 | 0.712720963 | 0.816609258 |
| cg16734017 | ARHGEF16      | 1  | 0.000619471 | 0.760306862 | 0.860989204 |
| cg00877708 | ARID1B;ARID1  | 6  | 0.006348285 | 0.497944668 | 0.641041293 |
| cg15618758 | ARID1B;ARID1  | 6  | 0.000401772 | 0.612703105 | 0.744444911 |
| cg03561416 | ARID1B;ARID1  | 6  | 0.014014378 | 0.178422419 | 0.282178043 |
| cg10845391 | ARL10         | 5  | 0.032962099 | 0.182694217 | 0.291655821 |
| cg08240466 | ASIP          | 20 | 0.006149732 | 0.342454425 | 0.497596354 |
| cg26955287 | ASPSCR1       | 17 | 0.027177468 | 0.344308934 | 0.500802337 |
| cg12374579 | ASPSCR1       | 17 | 0.029301493 | 0.315701699 | 0.455884667 |
| cg22949575 | ASPSCR1       | 17 | 0.007437768 | 0.493451495 | 0.633587634 |
| cg09925620 | ASPSCR1       | 17 | 0.00052105  | 0.619570337 | 0.742640549 |
| cg23928512 | ASPSCR1       | 17 | 0.005984423 | 0.430840833 | 0.551419003 |
| cg10624462 | ASPSCR1       | 17 | 0.021661189 | 0.313661688 | 0.433946877 |
| cg14529412 | ASS1;ASS1     | 9  | 2.25E-06    | 0.433703779 | 0.577600249 |
| cg14388093 | ASS1;ASS1     | 9  | 0.007067412 | 0.603400397 | 0.726297164 |
| cg14010829 | ASS1;ASS1     | 9  | 0.035599516 | 0.267988919 | 0.389257613 |
| cg13792444 | ASTN2;ASTN2;  | 9  | 0.032458604 | 0.238023646 | 0.357063052 |
| cg02019508 | ATF7;ATF7;ATI | 12 | 0.007067412 | 0.336552473 | 0.474376227 |
| cg00977707 | ATG7;ATG7;AT  | 3  | 0.01813195  | 0.444704786 | 0.56664079  |
| cg05471373 | ATM;ATM       | 11 | 0.000532616 | 0.565337743 | 0.731451765 |
| cg12139707 | ATM;ATM       | 11 | 0.001867143 | 0.619905472 | 0.749795821 |
| cg07622521 | ATOH8         | 2  | 0.022735795 | 0.473992522 | 0.650660775 |
| cg20839205 | ATOH8         | 2  | 0.007200249 | 0.142308685 | 0.278404974 |
| cg19484164 | ATP11A;ATP11  | 13 | 0.000318761 | 0.702877219 | 0.846782733 |
| cg14381255 | ATP11A;ATP11  | 13 | 0.028764112 | 0.276168773 | 0.407904428 |
| cg02873074 | ATP11A;ATP11  | 13 | 0.013624842 | 0.305542356 | 0.420685623 |

|            |               |    |             |             |             |
|------------|---------------|----|-------------|-------------|-------------|
| cg19970086 | ATP11A;ATP11  | 13 | 0.016348273 | 0.507990032 | 0.619645515 |
| cg10883123 | ATP11A;ATP11  | 13 | 0.037601078 | 0.368705129 | 0.475072521 |
| cg07674485 | ATP11A;ATP11  | 13 | 5.54E-05    | 0.712326928 | 0.817860554 |
| cg13858127 | ATP11A;ATP11  | 13 | 0.026328656 | 0.519059068 | 0.624270307 |
| cg13104274 | ATP1B1;ATP1E  | 1  | 0.001981094 | 0.359734904 | 0.525157951 |
| cg27347003 | ATP2A1;ATP2A  | 16 | 0.00702893  | 0.419195586 | 0.556764206 |
| cg05883442 | ATP6V0D1      | 16 | 0.001738702 | 0.216956651 | 0.319116133 |
| cg03640051 | ATP8A1;ATP8A  | 4  | 0.003181651 | 0.412286307 | 0.584737888 |
| cg02286270 | ATP8A2        | 13 | 0.010287566 | 0.505503303 | 0.628111838 |
| cg16280399 | ATXN1;ATXN1   | 6  | 0.024522607 | 0.279047463 | 0.439439789 |
| cg00151370 | ATXN1;ATXN1   | 6  | 0.000928912 | 0.153509836 | 0.28932858  |
| cg26843612 | ATXN1;ATXN1   | 6  | 0.046985565 | 0.357475522 | 0.485256168 |
| cg17242362 | ATXN7L1;ATXN  | 7  | 7.29E-05    | 0.252425044 | 0.446432421 |
| cg20186907 | ATXN7L1;ATXN  | 7  | 0.027062916 | 0.387176003 | 0.493950645 |
| cg08474953 | AUTS2;AUTS2   | 7  | 0.001055363 | 0.625986332 | 0.736513848 |
| cg03037437 | B3GNT7        | 2  | 0.004836081 | 0.304471941 | 0.422739141 |
| cg07139527 | B3GNTL1       | 17 | 0.003158336 | 0.594022114 | 0.735986103 |
| cg24962672 | B3GNTL1       | 17 | 0.017258315 | 0.333121502 | 0.473439601 |
| cg11472422 | B3GNTL1       | 17 | 0.037868322 | 0.204228845 | 0.341466653 |
| cg19877683 | B3GNTL1       | 17 | 0.02892347  | 0.361440799 | 0.48839164  |
| cg23532322 | BAIAP2;BAIAP; | 17 | 0.024002715 | 0.315979234 | 0.430253847 |
| cg09840386 | BAIAP2;BAIAP; | 17 | 0.027126518 | 0.210177931 | 0.340349563 |
| cg12097330 | BAIAP2;BAIAP; | 17 | 0.000942674 | 0.615603666 | 0.744268896 |
| cg26979299 | BANP;BANP     | 16 | 0.001731195 | 0.396927744 | 0.547575207 |
| cg01256999 | BANP;BANP     | 16 | 0.005111119 | 0.624060079 | 0.73098003  |
| cg09870004 | BANP;BANP     | 16 | 0.036302312 | 0.206539006 | 0.306975071 |
| cg15647614 | BAT1;BAT1     | 6  | 0.016982188 | 0.550326865 | 0.650922607 |
| cg10660666 | BAT2L1        | 9  | 0.035620328 | 0.509818315 | 0.621762506 |
| cg07703690 | BBOX1         | 11 | 0.00191677  | 0.244010497 | 0.400094436 |
| cg17192381 | BCL2          | 18 | 0.006976375 | 0.462745575 | 0.577011413 |
| cg12392126 | BCL2L14;BCL2I | 12 | 0.000213817 | 0.55434315  | 0.719143048 |
| cg01963573 | BEND3         | 6  | 0.010287583 | 0.358723869 | 0.473531804 |
| cg13533456 | BET3L         | 6  | 0.005016093 | 0.320350279 | 0.521791161 |
| cg07360805 | BLCAP;BLCAP;I | 20 | 0.017424948 | 0.211251789 | 0.311498644 |
| cg14579118 | BLVRA         | 7  | 0.0022441   | 0.197746335 | 0.337136717 |
| cg15020132 | BMPER         | 7  | 2.45E-05    | 0.39086761  | 0.582073603 |
| cg19051661 | BMPR1A        | 10 | 0.03792822  | 0.597184279 | 0.698531157 |
| cg23210521 | BMPR1B        | 4  | 3.08E-05    | 0.346902379 | 0.595683521 |
| cg02365648 | BNIP3         | 10 | 0.001036221 | 0.160400536 | 0.333887903 |
| cg10206933 | BNIP3         | 10 | 0.000210109 | 0.639795359 | 0.756487253 |
| cg05762616 | BNIP3         | 10 | 0.000632691 | 0.657768482 | 0.765815967 |
| cg06147895 | BNIP3         | 10 | 0.030983721 | 0.191434163 | 0.297158232 |
| cg22987267 | BNIP3L        | 8  | 0.024461355 | 0.322587222 | 0.453645737 |
| cg13071869 | BOC           | 3  | 0.004307176 | 0.370557089 | 0.562023684 |
| cg25132931 | BOC           | 3  | 0.017091848 | 0.374618033 | 0.527761575 |
| cg26375587 | BOC           | 3  | 0.027727594 | 0.410304241 | 0.54946213  |

|            |               |    |             |             |             |
|------------|---------------|----|-------------|-------------|-------------|
| cg15111495 | BOC           | 3  | 0.007147513 | 0.252413638 | 0.386141326 |
| cg13272743 | BOC           | 3  | 0.005072861 | 0.506451619 | 0.635131782 |
| cg11882488 | BOC           | 3  | 0.022283539 | 0.606215882 | 0.72853475  |
| cg01294253 | BRD3          | 9  | 0.015193425 | 0.202203846 | 0.304402003 |
| cg03657791 | BRD4          | 19 | 0.013393218 | 0.594296579 | 0.694613643 |
| cg11841741 | BTBD11;BTBD1  | 12 | 0.004975905 | 0.143316782 | 0.268012754 |
| cg25688060 | BTBD3         | 20 | 0.014327187 | 0.471144877 | 0.587103368 |
| cg02346282 | BTF3;BTF3     | 5  | 0.008036499 | 0.462943765 | 0.599889547 |
| cg14207539 | C10orf11      | 10 | 0.002479818 | 0.451284066 | 0.628513087 |
| cg23264016 | C10orf11      | 10 | 0.005108316 | 0.298732651 | 0.423412002 |
| cg00142482 | C10orf128     | 10 | 3.02E-05    | 0.45592867  | 0.649715094 |
| cg10775039 | C10orf71;C10c | 10 | 0.025317709 | 0.253892165 | 0.388751208 |
| cg18895336 | C10orf72      | 10 | 0.000217512 | 0.339351546 | 0.494253863 |
| cg18286127 | C10orf84;C10c | 10 | 0.010735691 | 0.222874458 | 0.379479052 |
| cg19879537 | C12orf34      | 12 | 0.007824342 | 0.526739615 | 0.65651567  |
| cg06530347 | C12orf77      | 12 | 0.00026754  | 0.618410716 | 0.733483487 |
| cg22591875 | C13orf33      | 13 | 0.005138295 | 0.494050238 | 0.607373143 |
| cg26938159 | C13orf35      | 13 | 0.001269672 | 0.647696238 | 0.753300335 |
| cg01904243 | C14orf43      | 14 | 0.000208387 | 0.214770498 | 0.355603503 |
| cg21032266 | C14orf43;C14c | 14 | 0.014218123 | 0.38659397  | 0.527635511 |
| cg03536657 | C15orf28;ANP1 | 15 | 0.000237192 | 0.408040359 | 0.564096638 |
| cg20352178 | C15orf28;ANP1 | 15 | 0.000655334 | 0.552767514 | 0.661979608 |
| cg20602300 | C15orf57;C15c | 15 | 0.000133328 | 0.351343012 | 0.591664273 |
| cg17140476 | C15orf57;C15c | 15 | 0.015678312 | 0.315261173 | 0.471591556 |
| cg16900255 | C15orf59      | 15 | 0.016271618 | 0.266430482 | 0.392019072 |
| cg14346202 | C15orf60      | 15 | 1.04E-05    | 0.487084515 | 0.60149343  |
| cg26967566 | C16orf74      | 16 | 0.022761836 | 0.338914542 | 0.45359506  |
| cg25657222 | C17orf100;ME  | 17 | 0.048466059 | 0.574782288 | 0.679139625 |
| cg25309567 | C17orf70;C17c | 17 | 0.003849887 | 0.319855168 | 0.449221623 |
| cg24780966 | C18orf1;C18or | 18 | 0.01592013  | 0.325689676 | 0.48287764  |
| cg17344770 | C19orf71      | 19 | 0.000189329 | 0.23012407  | 0.436102054 |
| cg07582892 | C1orf21       | 1  | 0.005433865 | 0.22493364  | 0.403873718 |
| cg21777154 | C1orf21       | 1  | 0.005955261 | 0.439545649 | 0.591733548 |
| cg11855643 | C1orf21       | 1  | 0.001759282 | 0.438917939 | 0.587225118 |
| cg22039357 | C1orf21       | 1  | 0.026818805 | 0.63673327  | 0.753947368 |
| cg09753749 | C1orf21       | 1  | 0.000368649 | 0.603598679 | 0.715184333 |
| cg05392323 | C1orf213;C1or | 1  | 0.00444225  | 0.385905319 | 0.498072197 |
| cg15644413 | C1orf216      | 1  | 0.000746003 | 0.364688752 | 0.504862113 |
| cg26227225 | C1orf86;LOC10 | 1  | 0.023836608 | 0.098698122 | 0.235367571 |
| cg05337761 | C1orf86;LOC10 | 1  | 0.049461315 | 0.119666089 | 0.229732836 |
| cg09695996 | C1QTNF8       | 16 | 0.000329603 | 0.269937715 | 0.388152904 |
| cg16125816 | C20orf117;C20 | 20 | 0.023430112 | 0.612110895 | 0.721611557 |
| cg06893362 | C20orf199;C20 | 20 | 0.006517278 | 0.4454841   | 0.549918425 |
| cg02341197 | C21orf62;C21c | 21 | 0.000424824 | 0.447878452 | 0.581621823 |
| cg10007534 | C21orf70      | 21 | 0.03009756  | 0.330573594 | 0.449699575 |
| cg05644223 | C21orf96;RUN  | 21 | 0.03391153  | 0.340482383 | 0.462158921 |

|            |                |    |             |             |             |
|------------|----------------|----|-------------|-------------|-------------|
| cg22948077 | C2orf40        | 2  | 0.020517788 | 0.412586923 | 0.541260583 |
| cg16171392 | C2orf54;C2orf1 | 2  | 0.000452509 | 0.529042889 | 0.655691615 |
| cg05486924 | C3orf21        | 3  | 0.000823477 | 0.245412821 | 0.355949765 |
| cg05966699 | C3orf52;MIR56  | 3  | 0.006251956 | 0.539843203 | 0.640616322 |
| cg22690884 | C3orf74        | 3  | 0.003101712 | 0.456754192 | 0.578847834 |
| cg06005199 | C4orf23        | 4  | 0.001248994 | 0.39969434  | 0.601540893 |
| cg11036672 | C4orf23        | 4  | 0.004054434 | 0.178116008 | 0.300692167 |
| cg01278041 | C4orf38        | 4  | 0.000327845 | 0.442364229 | 0.596349804 |
| cg15466157 | C4orf44;C4orf4 | 4  | 0.001628074 | 0.683899697 | 0.81393543  |
| cg15841665 | C4orf50        | 4  | 0.015443007 | 0.569476043 | 0.674505266 |
| cg06838283 | C5orf13;C5orf1 | 5  | 0.00019977  | 0.447065987 | 0.609405829 |
| cg26837896 | C5orf13;C5orf1 | 5  | 0.011893118 | 0.505159623 | 0.643561389 |
| cg08927631 | C5orf33;C5orf1 | 5  | 0.001774731 | 0.268972347 | 0.430695728 |
| cg19593009 | C5orf36        | 5  | 0.035162545 | 0.395703501 | 0.50227626  |
| cg13948857 | C5orf56        | 5  | 0.028591098 | 0.490031342 | 0.594924404 |
| cg14704780 | C6orf10        | 6  | 0.004221989 | 0.177885522 | 0.294663819 |
| cg17767198 | C6orf170       | 6  | 0.005813349 | 0.681152169 | 0.806566827 |
| cg03626892 | C6orf176       | 6  | 0.039652293 | 0.333168996 | 0.435172711 |
| cg22410568 | C6orf176;C6orf | 6  | 0.031280668 | 0.435089441 | 0.575677495 |
| cg10938046 | C6orf223       | 6  | 0.012766495 | 0.621466314 | 0.726267323 |
| cg16672203 | C6orf27        | 6  | 0.000194154 | 0.402983266 | 0.58301393  |
| cg11360546 | C7orf50;C7orf1 | 7  | 0.000114303 | 0.354420285 | 0.552881434 |
| cg09526129 | C7orf50;C7orf1 | 7  | 0.019863353 | 0.591914157 | 0.742371832 |
| cg01343703 | C7orf50;C7orf1 | 7  | 0.025108643 | 0.540744168 | 0.645176902 |
| cg24777710 | C7orf54;SND1   | 7  | 0.001704963 | 0.348758169 | 0.54406001  |
| cg02923831 | C8orf86        | 8  | 0.011583908 | 0.287601265 | 0.391802502 |
| cg05823563 | C9orf125       | 9  | 0.005403247 | 0.368372137 | 0.482170307 |
| cg14394451 | C9orf135       | 9  | 0.000851517 | 0.321030856 | 0.513569161 |
| cg21189849 | C9orf3         | 9  | 0.004677788 | 0.35423567  | 0.457816083 |
| cg25919221 | CA6            | 1  | 0.007117331 | 0.292301628 | 0.458730529 |
| cg09890339 | CACNA1C;CAC    | 12 | 4.30E-05    | 0.505864468 | 0.651473699 |
| cg23475725 | CACNA1C;CAC    | 12 | 0.002856736 | 0.224950168 | 0.330356333 |
| cg19685491 | CACNA1C;CAC    | 12 | 0.002318658 | 0.219289652 | 0.323637098 |
| cg19542445 | CACNA1C;CAC    | 12 | 0.001529019 | 0.525335525 | 0.628861283 |
| cg21793437 | CACNA1C;CAC    | 12 | 0.00886947  | 0.624505066 | 0.725700052 |
| cg19075717 | CACNA1G;CAC    | 17 | 0.010169218 | 0.314417123 | 0.434798146 |
| cg16922523 | CADM1;CADM     | 11 | 0.008421491 | 0.270636582 | 0.439521678 |
| cg25418947 | CALD1;CALD1;   | 7  | 0.016721689 | 0.39867876  | 0.524010206 |
| cg12097989 | CAMTA1         | 1  | 8.96E-05    | 0.354961473 | 0.527746132 |
| cg12865675 | CANX;CANX      | 5  | 0.024045499 | 0.482701551 | 0.584685492 |
| cg27090078 | CAPG           | 2  | 0.013653684 | 0.439996404 | 0.556729635 |
| cg06970290 | CAPN1          | 11 | 0.044266326 | 0.462950021 | 0.576453724 |
| cg16615776 | CAPN10;CAPN    | 2  | 0.010249789 | 0.276875481 | 0.444642724 |
| cg22428691 | CAPN2;CAPN2    | 1  | 0.001243278 | 0.490870722 | 0.599867437 |
| cg04652208 | CAPN8          | 1  | 0.026910325 | 0.384358325 | 0.528344466 |
| cg27235315 | CAPN8          | 1  | 0.042472639 | 0.472703088 | 0.586893776 |

|            |              |    |             |             |             |
|------------|--------------|----|-------------|-------------|-------------|
| cg11923724 | CARD10       | 22 | 0.03649985  | 0.740783015 | 0.845267043 |
| cg25709335 | CARKD        | 13 | 0.028876778 | 0.478918704 | 0.588935963 |
| cg17374433 | CASC2;CASC2  | 10 | 0.000140776 | 0.267820485 | 0.396371761 |
| cg19405868 | CASP1;CASP1; | 11 | 0.00390264  | 0.625684671 | 0.76925175  |
| cg15064681 | CASQ2        | 1  | 0.00644101  | 0.436473067 | 0.60462632  |
| cg10296496 | CBFA2T3;CBFA | 16 | 0.001068152 | 0.623739316 | 0.734313681 |
| cg01119453 | CBWD6        | 9  | 0.016243112 | 0.55187716  | 0.674331682 |
| cg22421579 | CCDC149;CCDC | 4  | 0.014375818 | 0.348524714 | 0.483609175 |
| cg11134246 | CCDC24       | 1  | 0.019034874 | 0.359020006 | 0.459026676 |
| cg23197939 | CCDC40       | 17 | 0.012363188 | 0.551379663 | 0.696366633 |
| cg13389211 | CCDC40       | 17 | 0.038098826 | 0.302662917 | 0.42738344  |
| cg15394558 | CCDC42;CCDC  | 17 | 0.045776317 | 0.375918456 | 0.482335985 |
| cg14422366 | CCDC88C      | 14 | 5.91E-07    | 0.623984693 | 0.778775846 |
| cg02390084 | CCDC91       | 12 | 0.00162382  | 0.542983501 | 0.703625971 |
| cg06539449 | CCND1        | 11 | 0.026882501 | 0.293737144 | 0.42086744  |
| cg00417288 | CCND2        | 12 | 0.020808739 | 0.537634898 | 0.680460329 |
| cg12594237 | CCND2        | 12 | 0.003656761 | 0.620904266 | 0.753984496 |
| cg09799980 | CCND2        | 12 | 0.02094595  | 0.414620219 | 0.539411113 |
| cg08614201 | CD160        | 1  | 0.004890358 | 0.52154332  | 0.646001002 |
| cg10124993 | CDCA4;CDCA4  | 14 | 0.000832229 | 0.443470551 | 0.562974692 |
| cg06001205 | CDH12        | 5  | 0.01570242  | 0.453924171 | 0.609610699 |
| cg01090433 | CDH13        | 16 | 0.034936174 | 0.478692774 | 0.591954678 |
| cg09723511 | CDH5         | 16 | 0.011024393 | 0.408614679 | 0.509857014 |
| cg03112433 | CDK14        | 7  | 0.008419349 | 0.474600518 | 0.586656599 |
| cg24591042 | CDYL;CDYL    | 6  | 0.000334806 | 0.717271216 | 0.828190861 |
| cg03187073 | CDYL;CDYL;CD | 6  | 0.002310405 | 0.290372753 | 0.453935212 |
| cg27307183 | CDYL;CDYL;CD | 6  | 0.000155409 | 0.207552434 | 0.365691524 |
| cg11356375 | CDYL;CDYL;CD | 6  | 0.000394843 | 0.611524393 | 0.745786667 |
| cg04148753 | CDYL;CDYL;CD | 6  | 0.030775562 | 0.460707841 | 0.574334928 |
| cg03408904 | CECR2        | 22 | 0.025477893 | 0.543552515 | 0.65995428  |
| cg16767221 | CGNL1        | 15 | 0.002946035 | 0.328875219 | 0.517726103 |
| cg22608534 | CHADL        | 22 | 0.031198159 | 0.324391629 | 0.425332527 |
| cg09690040 | CHCHD6       | 3  | 0.014839751 | 0.339016847 | 0.452366757 |
| cg16087630 | CHKA;CHKA    | 11 | 9.24E-05    | 0.528643556 | 0.668732807 |
| cg07583137 | CHMP4C       | 8  | 0.0471879   | 0.614195152 | 0.729046747 |
| cg01186595 | CHORDC1;CHC  | 11 | 0.023580928 | 0.431677242 | 0.536295598 |
| cg11117177 | CHST11       | 12 | 0.046650053 | 0.332359693 | 0.432382712 |
| cg24186506 | CHST15       | 10 | 2.00E-05    | 0.717489793 | 0.826624705 |
| cg13356370 | CILP         | 15 | 0.03416452  | 0.312658185 | 0.432060568 |
| cg12051116 | CLASP1;CLASP | 2  | 0.001298866 | 0.393956669 | 0.516952254 |
| cg10950615 | CLASP1;CLASP | 2  | 0.001406636 | 0.639602679 | 0.750734178 |
| cg23933759 | CLDN14;CLDN: | 21 | 0.001531401 | 0.401800832 | 0.517243203 |
| cg24794906 | CLDN14;CLDN: | 21 | 0.000375805 | 0.668331229 | 0.7689981   |
| cg26597734 | CLEC16A      | 16 | 0.02606354  | 0.136197187 | 0.250298317 |
| cg04952324 | CLIP2;CLIP2  | 7  | 0.000628494 | 0.516259356 | 0.659500271 |
| cg15489693 | CLNK         | 4  | 0.000228772 | 0.414649623 | 0.531585932 |

|            |              |    |             |             |             |
|------------|--------------|----|-------------|-------------|-------------|
| cg02020371 | CLPX         | 15 | 5.95E-05    | 0.647158549 | 0.779657909 |
| cg01995815 | CLSTN2       | 3  | 0.004812298 | 0.275442552 | 0.377062835 |
| cg07751214 | CLUAP1;CLUAF | 16 | 0.012694103 | 0.447119335 | 0.570142328 |
| cg23284609 | CMBL         | 5  | 0.011939689 | 0.329494258 | 0.450842692 |
| cg16353318 | CMIP;CMIP    | 16 | 0.000223459 | 0.35149606  | 0.511186365 |
| cg03031932 | CMIP;CMIP    | 16 | 0.000123727 | 0.633967872 | 0.743999271 |
| cg01033642 | CMIP;CMIP    | 16 | 4.39E-05    | 0.680018772 | 0.786367631 |
| cg05477582 | CMTM1;CMTN   | 16 | 0.029213023 | 0.687402952 | 0.794585068 |
| cg06715352 | CMTM4;CMTN   | 16 | 0.003471425 | 0.581092461 | 0.731677012 |
| cg05226518 | CNIH         | 14 | 0.03144671  | 0.3515399   | 0.486706769 |
| cg27269110 | CNKSR3       | 6  | 0.003669024 | 0.370292382 | 0.537145374 |
| cg16175941 | CNKSR3       | 6  | 0.016436382 | 0.2327608   | 0.382377102 |
| cg12448539 | CNN3         | 1  | 0.04733033  | 0.347662563 | 0.485515199 |
| cg15009198 | CNNM4        | 2  | 0.002034819 | 0.546688811 | 0.679888662 |
| cg20539798 | CNST;CNST    | 1  | 0.036578692 | 0.693751377 | 0.813143985 |
| cg14418582 | CNTLN        | 9  | 0.022794403 | 0.70487093  | 0.80832506  |
| cg04723449 | COG7         | 16 | 0.003129537 | 0.416073864 | 0.53772948  |
| cg15818109 | COL11A2;COL1 | 6  | 1.57E-05    | 0.240196036 | 0.454853905 |
| cg21205776 | COL11A2;COL1 | 6  | 4.85E-05    | 0.303047107 | 0.510847048 |
| cg10736955 | COL11A2;COL1 | 6  | 0.000618311 | 0.409254503 | 0.61359696  |
| cg01180523 | COL11A2;COL1 | 6  | 1.27E-05    | 0.269457519 | 0.470425924 |
| cg18671115 | COL11A2;COL1 | 6  | 0.001585649 | 0.269138742 | 0.469335416 |
| cg22161893 | COL11A2;COL1 | 6  | 0.000452879 | 0.385871315 | 0.582306044 |
| cg18375610 | COL11A2;COL1 | 6  | 0.00015362  | 0.44033603  | 0.61952297  |
| cg15173443 | COL11A2;COL1 | 6  | 0.000183204 | 0.382382739 | 0.560750688 |
| cg26322749 | COL11A2;COL1 | 6  | 0.001036221 | 0.420302049 | 0.598094347 |
| cg20269729 | COL11A2;COL1 | 6  | 0.001149127 | 0.298148627 | 0.475752588 |
| cg00501482 | COL11A2;COL1 | 6  | 0.002116913 | 0.365552018 | 0.541008627 |
| cg02230225 | COL11A2;COL1 | 6  | 0.005212866 | 0.368509913 | 0.543442743 |
| cg12061370 | COL11A2;COL1 | 6  | 0.002154019 | 0.264498017 | 0.428296867 |
| cg09502339 | COL11A2;COL1 | 6  | 0.003017277 | 0.258744677 | 0.419690714 |
| cg22748722 | COL11A2;COL1 | 6  | 0.000658547 | 0.434907201 | 0.594169107 |
| cg17596257 | COL11A2;COL1 | 6  | 0.002405814 | 0.382925779 | 0.539629509 |
| cg24311693 | COL11A2;COL1 | 6  | 0.018888916 | 0.258002998 | 0.410557233 |
| cg09261794 | COL11A2;COL1 | 6  | 0.003157694 | 0.172768919 | 0.325058313 |
| cg20798604 | COL11A2;COL1 | 6  | 0.000360905 | 0.218742842 | 0.369733092 |
| cg22361816 | COL11A2;COL1 | 6  | 3.81E-05    | 0.376995432 | 0.521840027 |
| cg00936309 | COL11A2;COL1 | 6  | 0.00015629  | 0.340170381 | 0.483479933 |
| cg00920162 | COL11A2;COL1 | 6  | 0.009200763 | 0.32599551  | 0.468841657 |
| cg23912266 | COL11A2;COL1 | 6  | 0.000735671 | 0.345589777 | 0.487303182 |
| cg13617209 | COL11A2;COL1 | 6  | 0.007140227 | 0.209804573 | 0.350010882 |
| cg26981781 | COL11A2;COL1 | 6  | 0.001505784 | 0.311744393 | 0.446612095 |
| cg16139380 | COL11A2;COL1 | 6  | 0.000491603 | 0.378562767 | 0.512514534 |
| cg01412022 | COL11A2;COL1 | 6  | 0.026120439 | 0.21657561  | 0.349529321 |
| cg12947757 | COL11A2;COL1 | 6  | 0.001049702 | 0.306315557 | 0.438258482 |
| cg03260211 | COL11A2;COL1 | 6  | 0.00188942  | 0.281599778 | 0.413370036 |



|            |              |    |             |             |             |
|------------|--------------|----|-------------|-------------|-------------|
| cg06113776 | COL11A2;COL1 | 6  | 0.000152843 | 0.542647375 | 0.673266452 |
| cg09344631 | COL11A2;COL1 | 6  | 0.00156435  | 0.18276693  | 0.312582687 |
| cg04653627 | COL11A2;COL1 | 6  | 0.001594662 | 0.478571742 | 0.605412828 |
| cg12228461 | COL11A2;COL1 | 6  | 0.020645512 | 0.283034827 | 0.409514141 |
| cg18624108 | COL11A2;COL1 | 6  | 0.000270856 | 0.510279492 | 0.632920992 |
| cg01320908 | COL11A2;COL1 | 6  | 0.007761837 | 0.5559547   | 0.675151831 |
| cg20427378 | COL11A2;COL1 | 6  | 6.53E-05    | 0.225091827 | 0.344011182 |
| cg13106156 | COL11A2;COL1 | 6  | 1.32E-05    | 0.388854331 | 0.505818357 |
| cg21240420 | COL11A2;COL1 | 6  | 0.000121774 | 0.331164264 | 0.447409349 |
| cg04249605 | COL11A2;COL1 | 6  | 0.018352756 | 0.271919036 | 0.38638074  |
| cg14683730 | COL11A2;COL1 | 6  | 0.036899561 | 0.172297409 | 0.283230843 |
| cg08077736 | COL11A2;COL1 | 6  | 0.010537245 | 0.205190561 | 0.315614249 |
| cg21696987 | COL11A2;COL1 | 6  | 0.005035344 | 0.284957348 | 0.393346622 |
| cg19887293 | COL11A2;COL1 | 6  | 0.004452635 | 0.316650183 | 0.424344414 |
| cg01828813 | COL11A2;COL1 | 6  | 0.002421172 | 0.29891125  | 0.406434435 |
| cg26079695 | COL11A2;COL1 | 6  | 0.00464132  | 0.569213932 | 0.674422067 |
| cg04399205 | COL11A2;COL1 | 6  | 1.50E-05    | 0.453461403 | 0.556639278 |
| cg14466923 | COL11A2;COL1 | 6  | 0.008729858 | 0.312751426 | 0.414892336 |
| cg17636806 | COL11A2;COL1 | 6  | 0.006537063 | 0.334431592 | 0.434680906 |
| cg03790047 | COL11A2;COL1 | 6  | 0.001321098 | 0.374915534 | 0.538362582 |
| cg11835806 | COL11A2;COL1 | 6  | 0.003670959 | 0.252799596 | 0.402508379 |
| cg22501449 | COL11A2;COL1 | 6  | 0.002448996 | 0.182753244 | 0.323429124 |
| cg04182805 | COL11A2;COL1 | 6  | 0.010373042 | 0.4392282   | 0.575070601 |
| cg24864639 | COL11A2;COL1 | 6  | 0.000906451 | 0.257567034 | 0.386117877 |
| cg23704085 | COL11A2;COL1 | 6  | 0.014717196 | 0.148359992 | 0.275578824 |
| cg21509966 | COL11A2;COL1 | 6  | 0.034358171 | 0.31389489  | 0.436447405 |
| cg03783258 | COL11A2;COL1 | 6  | 0.026445757 | 0.177996133 | 0.29802407  |
| cg01806857 | COL11A2;COL1 | 6  | 0.016011862 | 0.188933397 | 0.301427499 |
| cg01680268 | COL11A2;COL1 | 6  | 0.049409418 | 0.164812507 | 0.270187452 |
| cg20436086 | COL13A1;COL1 | 10 | 0.017835394 | 0.212112088 | 0.333300315 |
| cg24705158 | COL23A1      | 5  | 0.000253928 | 0.417345348 | 0.531969035 |
| cg13427810 | COL27A1      | 9  | 0.009446412 | 0.3419053   | 0.533500821 |
| cg08715466 | COL2A1;COL2/ | 12 | 0.010020427 | 0.236100114 | 0.366824199 |
| cg23889772 | COL5A3       | 19 | 2.96E-05    | 0.28816406  | 0.420570212 |
| cg00784153 | COL5A3       | 19 | 0.00031136  | 0.342672729 | 0.44439812  |
| cg22247792 | COL6A2;COL6/ | 21 | 0.018270183 | 0.447764045 | 0.576861452 |
| cg25142479 | COL9A1;COL9/ | 6  | 0.006875534 | 0.440356131 | 0.580407424 |
| cg09961397 | COL9A1;COL9/ | 6  | 0.003468102 | 0.566047808 | 0.68584604  |
| cg20682720 | COL9A1;COL9/ | 6  | 0.030492138 | 0.597546102 | 0.702334676 |
| cg10210510 | COL9A2       | 1  | 0.008941875 | 0.298647509 | 0.419120334 |
| cg07841132 | COL9A3       | 20 | 0.011072151 | 0.414637198 | 0.560317387 |
| cg07400741 | COL9A3       | 20 | 0.009138486 | 0.273108808 | 0.377033726 |
| cg26669806 | COMP         | 19 | 0.000289768 | 0.232621089 | 0.334689612 |
| cg12449974 | CORO2B       | 15 | 0.044589076 | 0.245059421 | 0.404069734 |
| cg26751588 | COX10        | 17 | 0.000524496 | 0.649955456 | 0.796364263 |
| cg24876069 | CP           | 3  | 0.044435532 | 0.442270023 | 0.558641572 |

|            |                |    |             |             |             |
|------------|----------------|----|-------------|-------------|-------------|
| cg23427348 | CPE            | 4  | 0.028977142 | 0.333441633 | 0.498170743 |
| cg01708636 | CPE            | 4  | 0.045150005 | 0.2476915   | 0.367969486 |
| cg03101058 | CPSF4L         | 17 | 0.008509079 | 0.367184724 | 0.491729282 |
| cg02100918 | CPT1A;CPT1A    | 11 | 0.000710639 | 0.718021834 | 0.821066743 |
| cg26906629 | CPT1A;CPT1A    | 11 | 0.038011002 | 0.420160095 | 0.521869394 |
| cg04732324 | CPT1A;CPT1A    | 11 | 0.012878502 | 0.595638694 | 0.696744227 |
| cg23729283 | CPVL;CPVL      | 7  | 0.040482524 | 0.441134909 | 0.568095361 |
| cg01225238 | CPVL;CPVL      | 7  | 0.022794403 | 0.431577139 | 0.55498334  |
| cg05811904 | CREB3L2        | 7  | 0.003215137 | 0.4097235   | 0.560307143 |
| cg09271097 | CREB3L2        | 7  | 0.002270738 | 0.252323184 | 0.395613619 |
| cg19573230 | CREB3L2        | 7  | 0.008437515 | 0.434969117 | 0.549369633 |
| cg15975598 | CREB3L2        | 7  | 0.013090124 | 0.50451555  | 0.606695199 |
| cg12552104 | CREB5;CREB5;C  | 7  | 0.027403566 | 0.268634528 | 0.394072813 |
| cg05194552 | CREBBP;CREBE   | 16 | 0.000229209 | 0.53734173  | 0.680282903 |
| cg09967633 | CRISPLD2       | 16 | 0.01826397  | 0.383143531 | 0.536530503 |
| cg02455706 | CRISPLD2       | 16 | 0.000149402 | 0.719934385 | 0.827952779 |
| cg03379552 | CRTAC1         | 10 | 0.000164066 | 0.389456991 | 0.565323076 |
| cg19421526 | CRTAC1         | 10 | 0.0028976   | 0.170032089 | 0.300275727 |
| cg02455383 | CRYBB1         | 22 | 0.033054401 | 0.446167889 | 0.555804075 |
| cg03244494 | CRYL1          | 13 | 0.024039679 | 0.338922561 | 0.485727559 |
| cg26894278 | CRYL1          | 13 | 0.001367167 | 0.611273646 | 0.712868138 |
| cg07169233 | CSGALNACT1;C   | 8  | 0.002930956 | 0.365862284 | 0.545423153 |
| cg00158770 | CSGALNACT1;C   | 8  | 0.00097795  | 0.337109629 | 0.477421944 |
| cg03651021 | CSGALNACT1;C   | 8  | 0.005573739 | 0.672819607 | 0.777809475 |
| cg21440084 | CSMD2          | 1  | 0.034674001 | 0.345802923 | 0.5491087   |
| cg06734519 | CSPG4          | 15 | 0.012810861 | 0.558860773 | 0.65924638  |
| cg14029169 | CST3           | 20 | 0.001200536 | 0.562024174 | 0.723543776 |
| cg16399632 | CTBP1;CTBP1;C  | 4  | 0.044487352 | 0.658843875 | 0.759570959 |
| cg21373263 | CTBP2;CTBP2    | 10 | 0.035559711 | 0.413030527 | 0.543645754 |
| cg06240209 | CTBP2;CTBP2;C  | 10 | 4.93E-06    | 0.562008759 | 0.777999692 |
| cg07237540 | CTDP1;CTDP1    | 18 | 0.018603039 | 0.440959411 | 0.564936745 |
| cg05726118 | CTNNB1;CTNN    | 3  | 0.000178093 | 0.220269285 | 0.353317664 |
| cg16118839 | CTSC;CTSC;CTSC | 11 | 0.002420727 | 0.397792115 | 0.548641388 |
| cg22720428 | CTTN;CTTN      | 11 | 0.002652377 | 0.266476994 | 0.450464712 |
| cg08914150 | CTTN;CTTN      | 11 | 0.004545573 | 0.584685322 | 0.728804674 |
| cg12450012 | CTTN;CTTN      | 11 | 0.026404377 | 0.434266935 | 0.563802177 |
| cg02011981 | CTTN;CTTN      | 11 | 0.021253833 | 0.554147785 | 0.680577893 |
| cg02743342 | CTXN3          | 5  | 0.007915919 | 0.59155429  | 0.705130279 |
| cg07157169 | CTXN3;CTXN3    | 5  | 0.001102157 | 0.52368192  | 0.643990401 |
| cg11987802 | CUGBP1         | 11 | 0.028173633 | 0.346449388 | 0.484775905 |
| cg25119743 | CUGBP2;CUGB    | 10 | 0.00700107  | 0.332950182 | 0.442129336 |
| cg12349350 | CUX1;CUX1;CL   | 7  | 0.010444241 | 0.26629219  | 0.444943572 |
| cg26570844 | CUX1;CUX1;CL   | 7  | 0.015052525 | 0.186470276 | 0.360515993 |
| cg14466759 | CUX1;CUX1;CL   | 7  | 0.049390062 | 0.222506394 | 0.363643085 |
| cg02911387 | CUX1;CUX1;CL   | 7  | 0.003648471 | 0.216372276 | 0.344255893 |
| cg07266412 | CUX1;CUX1;CL   | 7  | 0.025992121 | 0.277765164 | 0.405205053 |

|            |               |    |             |             |             |
|------------|---------------|----|-------------|-------------|-------------|
| cg14203426 | CUX1;CUX1;CL  | 7  | 0.021558858 | 0.37789772  | 0.491788251 |
| cg18483404 | CUZD1         | 10 | 0.022430727 | 0.257833843 | 0.38665394  |
| cg17793354 | CXCR7         | 2  | 0.009101092 | 0.659374973 | 0.759732366 |
| cg04406620 | CYB5B         | 16 | 0.006591112 | 0.638255212 | 0.73959073  |
| cg07750741 | CYFIP2;CYFIP2 | 5  | 1.28E-05    | 0.408328734 | 0.527723179 |
| cg02603251 | CYFIP2;CYFIP2 | 5  | 0.041602559 | 0.344707247 | 0.445215858 |
| cg21181051 | CYP20A1       | 2  | 0.01856772  | 0.265491009 | 0.397325619 |
| cg15160709 | CYP26B1       | 2  | 0.003886032 | 0.387519934 | 0.502148273 |
| cg01959421 | CYP26B1       | 2  | 0.04414976  | 0.137526491 | 0.248406682 |
| cg02394395 | CYP26C1       | 10 | 0.028439565 | 0.399785524 | 0.515422479 |
| cg20492034 | CYTH3         | 7  | 0.021463918 | 0.245612278 | 0.368123689 |
| cg24921319 | CYTH3         | 7  | 0.015104258 | 0.450245108 | 0.566376849 |
| cg08893109 | CYTH3         | 7  | 0.015131512 | 0.645273532 | 0.75205655  |
| cg25151803 | D2HGDH        | 2  | 0.000763942 | 0.67817515  | 0.778258275 |
| cg05609656 | DAAM2         | 6  | 0.000640551 | 0.333140159 | 0.530725542 |
| cg21115558 | DAAM2         | 6  | 0.000238852 | 0.168315325 | 0.271313946 |
| cg18801045 | DAP           | 5  | 0.006020328 | 0.207926984 | 0.385891116 |
| cg05473987 | DAP           | 5  | 0.000165284 | 0.31311907  | 0.484740366 |
| cg24754277 | DAPK1         | 9  | 0.007100288 | 0.194012339 | 0.2949718   |
| cg11775215 | DAPK2         | 15 | 0.015462241 | 0.443693031 | 0.56021768  |
| cg02973883 | DCAF4;DCAF4;  | 14 | 0.008990691 | 0.574752864 | 0.761410523 |
| cg16177647 | DCAKD;DCAKD   | 17 | 0.013976516 | 0.346892853 | 0.502490853 |
| cg11325273 | DCLK1         | 13 | 0.031822843 | 0.173819227 | 0.29184364  |
| cg18969798 | DCLK2;DCLK2   | 4  | 0.000535104 | 0.558030086 | 0.722623559 |
| cg22806908 | DCP1A         | 3  | 0.018012836 | 0.368753674 | 0.526124927 |
| cg01820584 | DCUN1D4;DCL   | 4  | 0.002173925 | 0.274938338 | 0.515064186 |
| cg16707952 | DDR1;DDR1     | 6  | 0.007493589 | 0.442143387 | 0.570336917 |
| cg07194374 | DDX24         | 14 | 0.010169218 | 0.41249821  | 0.55969771  |
| cg05587627 | DDX6          | 11 | 0.004594394 | 0.307734712 | 0.427034852 |
| cg21156386 | DEAF1         | 11 | 0.016832673 | 0.259016947 | 0.389831628 |
| cg21442881 | DENND3        | 8  | 6.89E-06    | 0.215354365 | 0.450911437 |
| cg07580128 | DENND3        | 8  | 0.009274538 | 0.638161434 | 0.743583926 |
| cg02919712 | DEPDC6        | 8  | 0.02261037  | 0.292596647 | 0.40617829  |
| cg13826055 | DFNB31;DFNB   | 9  | 0.024958832 | 0.446967519 | 0.605887807 |
| cg15815084 | DGKE          | 17 | 0.001583817 | 0.209293392 | 0.341113461 |
| cg02085942 | DGKI          | 7  | 0.001404867 | 0.524745716 | 0.653710468 |
| cg20291423 | DHCR24        | 1  | 0.029828046 | 0.363932581 | 0.483120409 |
| cg10523319 | DHRS3         | 1  | 0.000599105 | 0.571495836 | 0.715136657 |
| cg02228675 | DHX58         | 17 | 0.000321173 | 0.182824368 | 0.288392008 |
| cg10085203 | DIAPH3        | 13 | 0.003508968 | 0.420260037 | 0.558842091 |
| cg15283194 | DIAPH3        | 13 | 0.005557211 | 0.440277039 | 0.543167595 |
| cg10948630 | DICER1;DICER1 | 14 | 0.013425943 | 0.599806175 | 0.734915053 |
| cg25301103 | DIP2C         | 10 | 0.002229165 | 0.492612296 | 0.716151852 |
| cg09782637 | DIP2C         | 10 | 0.006978937 | 0.439992152 | 0.632696554 |
| cg11423998 | DIP2C         | 10 | 0.001711462 | 0.512037297 | 0.693857912 |
| cg04806237 | DIP2C         | 10 | 0.012883452 | 0.63440808  | 0.788830662 |

|            |               |    |             |             |             |
|------------|---------------|----|-------------|-------------|-------------|
| cg08306029 | DIP2C         | 10 | 0.003059973 | 0.577204303 | 0.71082503  |
| cg08079763 | DIP2C         | 10 | 0.000217662 | 0.206311897 | 0.33405585  |
| cg17333886 | DIP2C         | 10 | 0.007894736 | 0.325442995 | 0.451143781 |
| cg04720116 | DIP2C         | 10 | 0.034632307 | 0.457905302 | 0.581514545 |
| cg13477178 | DIP2C         | 10 | 0.006178496 | 0.166358385 | 0.28995157  |
| cg17905091 | DIP2C         | 10 | 0.048113387 | 0.411241162 | 0.53326939  |
| cg06156195 | DIP2C         | 10 | 0.01313551  | 0.54698041  | 0.665401846 |
| cg12519998 | DIP2C         | 10 | 0.005326132 | 0.598237787 | 0.716050823 |
| cg10494981 | DIP2C         | 10 | 0.014904156 | 0.636817595 | 0.75183499  |
| cg20251943 | DIP2C         | 10 | 0.011617554 | 0.25208739  | 0.362545817 |
| cg02594677 | DIP2C         | 10 | 0.014336297 | 0.651240784 | 0.757878091 |
| cg18962750 | DIXDC1;DIXDC  | 11 | 0.015449173 | 0.561451058 | 0.66490248  |
| cg16749785 | DLC1;DLC1;DL  | 8  | 0.042903717 | 0.4801951   | 0.604472075 |
| cg27126505 | DLEU7         | 13 | 0.021888518 | 0.481202859 | 0.59791193  |
| cg24182581 | DLG2;DLG2;DL  | 11 | 0.019209382 | 0.323183909 | 0.452546284 |
| cg25804443 | DLGAP1        | 18 | 0.017332133 | 0.598858774 | 0.709088124 |
| cg00495303 | DLGAP1;DLGA   | 18 | 0.019989075 | 0.338511865 | 0.484746197 |
| cg09803262 | DLX6AS        | 7  | 0.038783312 | 0.328291875 | 0.45902581  |
| cg06710981 | DMPK;DMPK;I   | 19 | 4.45E-05    | 0.210611906 | 0.334157355 |
| cg25700533 | DNAJC17;C15c  | 15 | 0.011074884 | 0.075393319 | 0.179246309 |
| cg10703481 | DNHD1;DNHD    | 11 | 0.000723471 | 0.565888194 | 0.698411621 |
| cg21500354 | DNHD1;DNHD    | 11 | 0.006173779 | 0.289819867 | 0.392255491 |
| cg06748978 | DNMT3A;DNM    | 2  | 0.020540363 | 0.318202567 | 0.442256957 |
| cg15676916 | DOCK1         | 10 | 0.002089357 | 0.48456922  | 0.625545747 |
| cg05046083 | DOCK4         | 7  | 0.018811131 | 0.232907865 | 0.369116331 |
| cg13690241 | DOK1          | 2  | 0.000751549 | 0.518389198 | 0.659556397 |
| cg11800635 | DOK1          | 2  | 0.000270781 | 0.169205954 | 0.29065043  |
| cg14293102 | DOT1L         | 19 | 0.001986558 | 0.530780815 | 0.672639746 |
| cg01901381 | DPF3          | 14 | 0.001438695 | 0.450081127 | 0.562605645 |
| cg14116056 | DPY19L1       | 7  | 0.015985301 | 0.496972013 | 0.603609451 |
| cg04065210 | DPY19L1       | 7  | 0.040120063 | 0.268852236 | 0.370526267 |
| cg02643433 | DSP;DSP       | 6  | 0.020873108 | 0.264654292 | 0.370071529 |
| cg26562772 | DUSP10;DUSP   | 1  | 0.024622862 | 0.48951877  | 0.624626005 |
| cg10539173 | DUSP16        | 12 | 0.000195287 | 0.583748759 | 0.730554372 |
| cg12245706 | DYSF;DYSF;DYS | 2  | 0.001144054 | 0.266287909 | 0.472027377 |
| cg14196395 | DYSF;DYSF;DYS | 2  | 0.003367228 | 0.281715209 | 0.479617196 |
| cg14689456 | DYSF;DYSF;DYS | 2  | 0.027966732 | 0.53350693  | 0.64145085  |
| cg19400179 | DZIP3         | 3  | 0.015526846 | 0.402396744 | 0.53384042  |
| cg22480875 | E2F7          | 12 | 0.04263191  | 0.578801613 | 0.68070041  |
| cg14731044 | E2F8          | 11 | 5.50E-06    | 0.546310578 | 0.717482233 |
| cg11690724 | EBF1          | 5  | 1.90E-05    | 0.42376707  | 0.649688816 |
| cg09172244 | EBF1          | 5  | 0.034365055 | 0.305171117 | 0.445969    |
| cg16093296 | EBF3          | 10 | 0.017917924 | 0.615741051 | 0.771275962 |
| cg13638229 | EBF3          | 10 | 0.017179479 | 0.443908592 | 0.554517704 |
| cg05881068 | EBF3          | 10 | 0.000586806 | 0.780633893 | 0.881538905 |
| cg17906168 | EFNB2         | 13 | 0.000105491 | 0.367059837 | 0.560507659 |

|            |                |    |             |             |              |
|------------|----------------|----|-------------|-------------|--------------|
| cg18815120 | EGLN1          | 1  | 0.010612109 | 0.556787706 | 0.662646399  |
| cg19770715 | EHMT2;SLC44/   | 6  | 0.003175472 | 0.261733101 | 0.395136863  |
| cg13582226 | EIF2C2;EIF2C2  | 8  | 0.004566792 | 0.471316452 | 0.57620146   |
| cg11832601 | EIF3F          | 11 | 0.037210467 | 0.479219905 | 0.583307284  |
| cg25768108 | EIF3H          | 8  | 0.002034819 | 0.707684869 | 0.823068949  |
| cg17868307 | EIF4H;EIF4H    | 7  | 0.002477853 | 0.476625645 | 0.623587288  |
| cg12691679 | ELF1           | 13 | 0.001620224 | 0.326366974 | 0.485052501  |
| cg07897871 | ELF3;ELF3;ELF3 | 1  | 0.003967894 | 0.459618376 | 0.609476661  |
| cg02076020 | ELF3;ELF3;ELF3 | 1  | 0.010237104 | 0.275934371 | 0.41402559   |
| cg26328757 | ELF3;ELF3;ELF3 | 1  | 0.011363075 | 0.447519254 | 0.562308195  |
| cg08044454 | ELMO1;ELMO1    | 7  | 3.63E-05    | 0.318244185 | 0.494269461  |
| cg24859546 | ELOVL4         | 6  | 0.000452509 | 0.493581293 | 0.653145299  |
| cg01389032 | ENHO           | 9  | 0.003545468 | 0.493170057 | 0.615886202  |
| cg26938599 | ENKUR          | 10 | 0.032523466 | 0.310981888 | 0.434733197  |
| cg13777984 | ENOX1;ENOX1    | 13 | 0.047446032 | 0.154342222 | 0.277206142  |
| cg18334681 | ENPP3          | 6  | 0.004324095 | 0.22341212  | 0.357540697  |
| cg19270309 | ENPP7          | 17 | 0.003537857 | 0.244686402 | 0.359056101  |
| cg14090400 | EPB41L3        | 18 | 0.025452908 | 0.582407452 | 0.723787001  |
| cg15447913 | EPHB2;EPHB2    | 1  | 0.000769191 | 0.681399163 | 0.796365503  |
| cg13694876 | EPHB3          | 3  | 0.014770664 | 0.419848446 | 0.546517779  |
| cg15334250 | EPHB3          | 3  | 0.041957427 | 0.34112962  | 0.452328638  |
| cg10378735 | EPHB6          | 7  | 0.007287708 | 0.459925981 | 0.588259766  |
| cg22303758 | EPHX2          | 8  | 0.003867871 | 0.267066992 | 0.4234448284 |
| cg25673598 | EPN2;EPN2;EP   | 17 | 0.002478873 | 0.121780683 | 0.22811589   |
| cg11414610 | EPS15L1        | 19 | 0.002383727 | 0.324856357 | 0.499275616  |
| cg06146977 | EPSTI1;EPSTI1  | 13 | 0.001555562 | 0.339250722 | 0.47611208   |
| cg26108843 | ERG;ERG        | 21 | 0.000981443 | 0.370973774 | 0.518298904  |
| cg06638529 | ERI3           | 1  | 5.55E-05    | 0.201999589 | 0.33482701   |
| cg15858679 | ERP27          | 12 | 0.006227819 | 0.449036378 | 0.623485683  |
| cg15676711 | ERRF1          | 1  | 0.029793288 | 0.419862904 | 0.521689774  |
| cg04044203 | ESAM           | 11 | 0.002568859 | 0.475222971 | 0.602605039  |
| cg04118119 | ESD            | 13 | 0.035993969 | 0.344726198 | 0.457370652  |
| cg09646983 | ESR1;ESR1      | 6  | 0.00816076  | 0.542231265 | 0.645782433  |
| cg07019303 | ETV6           | 12 | 0.000100711 | 0.408392473 | 0.538343351  |
| cg13654884 | EXOC6          | 10 | 0.008377456 | 0.548567593 | 0.655820269  |
| cg26227044 | EXOC8          | 1  | 0.002709433 | 0.320852126 | 0.432467246  |
| cg24892992 | EXT1           | 8  | 0.002431457 | 0.406304462 | 0.563334488  |
| cg04395788 | EXT1           | 8  | 0.011648298 | 0.302142017 | 0.450956258  |
| cg02925848 | EXT1           | 8  | 0.005406175 | 0.315813827 | 0.456842289  |
| cg22271457 | EXT1           | 8  | 0.01473963  | 0.600320929 | 0.730954604  |
| cg07551677 | EXTL3          | 8  | 0.006664699 | 0.626791294 | 0.749958877  |
| cg18817392 | EYA4;EYA4;EY/  | 6  | 0.008425624 | 0.453783582 | 0.559107569  |
| cg02716952 | EZH2;EZH2      | 7  | 0.009849422 | 0.446527276 | 0.564567845  |
| cg18868540 | F2             | 11 | 0.046908283 | 0.330801837 | 0.448198077  |
| cg26667735 | FAAH           | 1  | 1.15E-05    | 0.546208085 | 0.716342054  |
| cg18672389 | FAM101A        | 12 | 0.015605767 | 0.292660853 | 0.450614266  |

|            |               |    |             |             |             |
|------------|---------------|----|-------------|-------------|-------------|
| cg14273093 | FAM101A       | 12 | 0.011466706 | 0.251568681 | 0.391689142 |
| cg05712979 | FAM101A       | 12 | 0.002478873 | 0.466117978 | 0.568480954 |
| cg08608727 | FAM109A       | 12 | 6.77E-05    | 0.514903879 | 0.6255909   |
| cg23013850 | FAM124B;FAM   | 2  | 0.015718313 | 0.503733095 | 0.611394459 |
| cg25182523 | FAM129A       | 1  | 0.000353369 | 0.283603661 | 0.422143708 |
| cg17156402 | FAM131C       | 1  | 0.003664424 | 0.501995103 | 0.607783377 |
| cg04860977 | FAM155A       | 13 | 0.037207114 | 0.320893096 | 0.47609924  |
| cg18345406 | FAM160A1      | 4  | 0.000155381 | 0.285721496 | 0.468704883 |
| cg02564061 | FAM186B;FAM   | 12 | 0.000799207 | 0.425385447 | 0.560090684 |
| cg19619956 | FAM193B;FAM   | 5  | 4.27E-05    | 0.213736455 | 0.31903991  |
| cg24286414 | FAM20C        | 7  | 0.013463222 | 0.484684428 | 0.604960356 |
| cg25929664 | FAM20C        | 7  | 0.038406352 | 0.186945927 | 0.304319061 |
| cg23782833 | FAM20C        | 7  | 0.022344342 | 0.247645469 | 0.35781756  |
| cg18234533 | FAM20C        | 7  | 0.017540877 | 0.348907995 | 0.45841103  |
| cg27539806 | FAM38A        | 16 | 0.013536666 | 0.406708574 | 0.542767515 |
| cg07765262 | FAM53A        | 4  | 0.021964297 | 0.426573707 | 0.561133022 |
| cg19975346 | FAM53B        | 10 | 1.22E-05    | 0.169006579 | 0.387054931 |
| cg24916358 | FAM53B        | 10 | 0.001055398 | 0.368917048 | 0.524591053 |
| cg23088510 | FAM53B        | 10 | 0.026663173 | 0.282562117 | 0.422504016 |
| cg00557402 | FAM55D;FAM!   | 11 | 0.003127665 | 0.426568142 | 0.571342691 |
| cg18086635 | FAM59A        | 18 | 0.000198478 | 0.261774079 | 0.375247542 |
| cg07890785 | FAM64A        | 17 | 0.043587475 | 0.489475247 | 0.602914573 |
| cg21217092 | FAM82A2       | 15 | 0.002487826 | 0.631732544 | 0.751119704 |
| cg21670708 | FAM84B        | 8  | 0.012653379 | 0.484605689 | 0.588502504 |
| cg13791971 | FANCC         | 9  | 0.011392032 | 0.282608648 | 0.393094442 |
| cg04213384 | FARP1         | 13 | 0.007031181 | 0.514135679 | 0.622306804 |
| cg25678270 | FARP1         | 13 | 2.30E-05    | 0.579624539 | 0.681837252 |
| cg16689193 | FARP1;FARP1   | 13 | 0.008377456 | 0.613252516 | 0.721356216 |
| cg06450397 | FAS;FAS;FAS;F | 10 | 0.000789844 | 0.392926024 | 0.578809307 |
| cg01880399 | FAT1          | 4  | 0.027120634 | 0.307944378 | 0.433595812 |
| cg20656964 | FAT1          | 4  | 0.019024706 | 0.507221724 | 0.616345955 |
| cg16251130 | FAT1          | 4  | 0.001494811 | 0.568871676 | 0.677184296 |
| cg04907084 | FAT3          | 11 | 0.00724137  | 0.321202861 | 0.459954322 |
| cg08351489 | FAT3          | 11 | 0.041644088 | 0.301483317 | 0.403869591 |
| cg18183817 | FBLN2;FBLN2;I | 3  | 0.000720479 | 0.650123435 | 0.786446224 |
| cg00498816 | FBLN2;FBLN2;I | 3  | 0.01251511  | 0.67000248  | 0.777251862 |
| cg18982384 | FBLN5         | 14 | 0.000372302 | 0.666835332 | 0.770224162 |
| cg04956944 | FBLN7;FBLN7   | 2  | 0.015756377 | 0.398158459 | 0.519932553 |
| cg20664313 | FBRSL1        | 12 | 0.000942674 | 0.363288265 | 0.484393605 |
| cg23985408 | FBXW11;FBXW   | 5  | 0.012931474 | 0.274403699 | 0.416343173 |
| cg07050611 | FBXW8;FBXW    | 12 | 0.00684948  | 0.380922122 | 0.534445712 |
| cg26549860 | FCHSD2        | 11 | 0.006316824 | 0.302281883 | 0.449382618 |
| cg09718347 | FGD5          | 3  | 0.001768597 | 0.384097451 | 0.561935711 |
| cg20684197 | FGF1;FGF1;FGI | 5  | 0.007611524 | 0.212242885 | 0.38693798  |
| cg07206630 | FGF1;FGF1;FGI | 5  | 0.04292727  | 0.41689146  | 0.558401467 |
| cg19576738 | FGF2          | 4  | 0.013450273 | 0.109739528 | 0.228375218 |

|            |                |    |             |             |             |
|------------|----------------|----|-------------|-------------|-------------|
| cg20336472 | FGFR1;FGFR1;l  | 8  | 0.023256013 | 0.535248673 | 0.648547464 |
| cg17235897 | FGFR2;FGFR2;l  | 10 | 4.52E-05    | 0.218792326 | 0.381433011 |
| cg20277356 | FGFR2;FGFR2;l  | 10 | 0.046787267 | 0.250097653 | 0.383097011 |
| cg14834653 | FGFR2;FGFR2;l  | 10 | 0.031061472 | 0.197725956 | 0.329091366 |
| cg25294906 | FGFR2;FGFR2;l  | 10 | 0.032390375 | 0.36401181  | 0.489791855 |
| cg10280007 | FGFR2;FGFR2;l  | 10 | 0.032822973 | 0.228041146 | 0.350143294 |
| cg13734061 | FGFR2;FGFR2;l  | 10 | 0.04623681  | 0.528892659 | 0.636881275 |
| cg10362842 | FGFR2;FGFR2;l  | 10 | 0.003836569 | 0.300391178 | 0.425620502 |
| cg21311834 | FGFR3;FGFR3;l  | 4  | 0.007094393 | 0.209177882 | 0.404332584 |
| cg08145949 | FGFR3;FGFR3;l  | 4  | 0.006245013 | 0.27719307  | 0.422081412 |
| cg15697036 | FGFR3;FGFR3;l  | 4  | 0.02843986  | 0.390489721 | 0.491028973 |
| cg14869372 | FGFRL1;FGFRL   | 4  | 0.013408793 | 0.397816048 | 0.538015035 |
| cg11411884 | FGFRL1;FGFRL   | 4  | 0.01508316  | 0.543576513 | 0.650744102 |
| cg06839424 | FGFRL1;FGFRL   | 4  | 0.001471131 | 0.373163356 | 0.475303198 |
| cg11815980 | FHIT;FHIT      | 3  | 0.002344105 | 0.416871866 | 0.566480447 |
| cg08223225 | FHIT;FHIT      | 3  | 5.57E-05    | 0.605238464 | 0.719565474 |
| cg20306574 | FITM1          | 14 | 0.047973178 | 0.464993027 | 0.583269519 |
| cg25877553 | FKBP1A;FKBP1   | 20 | 0.002764953 | 0.623263441 | 0.724154547 |
| cg19226017 | FKBP5;LOC285   | 6  | 0.029399116 | 0.280673811 | 0.406512333 |
| cg08373323 | FLJ32810       | 11 | 0.0152083   | 0.209613951 | 0.367799875 |
| cg24579887 | FLJ42709;FLJ4; | 5  | 0.000409889 | 0.348873739 | 0.520920363 |
| cg00434461 | FLJ42709;FLJ4; | 5  | 0.02032421  | 0.573414461 | 0.707822298 |
| cg04837616 | FLJ45079       | 17 | 9.99E-07    | 0.45585316  | 0.57725319  |
| cg03243768 | FLJ46111       | 11 | 0.042222558 | 0.73026029  | 0.83829694  |
| cg05116002 | FLNB;FLNB;FLN  | 3  | 0.010600611 | 0.188884251 | 0.307708618 |
| cg13619277 | FMN1           | 15 | 0.038517968 | 0.15985878  | 0.27586859  |
| cg12495731 | FN3K           | 17 | 0.009138486 | 0.428692256 | 0.591290389 |
| cg04239247 | FNBP1L;FNBP1   | 1  | 6.54E-05    | 0.289084001 | 0.408328196 |
| cg19244312 | FNDC3B;FNDC    | 3  | 0.000586993 | 0.599832265 | 0.713660306 |
| cg13017471 | FNDC3B;FNDC    | 3  | 0.001702436 | 0.561588872 | 0.670730387 |
| cg00360324 | FNDC4          | 2  | 0.007716638 | 0.631709978 | 0.752202675 |
| cg09562426 | FOLR1;FOLR1;l  | 11 | 0.027440743 | 0.378722862 | 0.501936016 |
| cg01243371 | FOXF1          | 16 | 0.016028751 | 0.345830779 | 0.446689147 |
| cg25330264 | FOXK1          | 7  | 0.002268463 | 0.338048291 | 0.498700636 |
| cg06114605 | FOXK1          | 7  | 0.016046364 | 0.408238299 | 0.549250121 |
| cg05102770 | FOXK1          | 7  | 0.023086362 | 0.575457261 | 0.701796947 |
| cg14391345 | FOXN3          | 14 | 0.000223115 | 0.645121937 | 0.768404706 |
| cg24714561 | FOXN3          | 14 | 0.003271439 | 0.513468173 | 0.632917563 |
| cg19484481 | FOXO3;FOXO3    | 6  | 0.004053307 | 0.302628466 | 0.506843402 |
| cg07580479 | FOXO3;FOXO3    | 6  | 0.015309065 | 0.535303115 | 0.659997117 |
| cg20847580 | FOXP4;FOXP4;   | 6  | 6.53E-05    | 0.084631762 | 0.207134704 |
| cg07588430 | FOXP4;FOXP4;   | 6  | 0.011097457 | 0.515743678 | 0.621032486 |
| cg06127202 | FRK            | 6  | 0.042487143 | 0.206391003 | 0.308341932 |
| cg27572370 | FRMD4A         | 10 | 0.019482936 | 0.439162325 | 0.553028578 |
| cg27423627 | FRMD4B         | 3  | 0.006104718 | 0.486885524 | 0.6134399   |
| cg25274185 | FRY            | 13 | 0.008992625 | 0.231500419 | 0.362162137 |

|            |                |    |             |             |             |
|------------|----------------|----|-------------|-------------|-------------|
| cg07352158 | FSTL1          | 3  | 0.011327461 | 0.574134489 | 0.705609912 |
| cg05642923 | FTSJ3          | 17 | 0.004913159 | 0.477807151 | 0.606076926 |
| cg00758797 | FURIN          | 15 | 0.034284584 | 0.386656413 | 0.501333415 |
| cg14738670 | FXVD1;FXVD7;I  | 19 | 7.59E-05    | 0.301745271 | 0.405512122 |
| cg22335223 | FXVD2          | 11 | 0.000261968 | 0.297045311 | 0.414919409 |
| cg00161459 | FZD6;FZD6;FZD  | 8  | 0.0470618   | 0.515523228 | 0.636209482 |
| cg17453767 | GAB1;GAB1      | 4  | 0.008582921 | 0.609256984 | 0.723102379 |
| cg10227830 | GAB1;GAB1      | 4  | 0.006918751 | 0.315825075 | 0.425011023 |
| cg14142817 | GAB1;GAB1      | 4  | 0.005417017 | 0.636642964 | 0.739881929 |
| cg03286735 | GAK            | 4  | 0.049162621 | 0.369189524 | 0.477516387 |
| cg04412054 | GALNS          | 16 | 0.019688739 | 0.777585788 | 0.882484582 |
| cg05784532 | GALNT2         | 1  | 0.000720542 | 0.397273505 | 0.541656885 |
| cg15817769 | GALNT2         | 1  | 0.025441668 | 0.210983093 | 0.354646747 |
| cg11795921 | GALNT2         | 1  | 0.029428352 | 0.351823831 | 0.482066955 |
| cg17954142 | GALNT2         | 1  | 0.002720778 | 0.326741531 | 0.446925952 |
| cg05527856 | GALNTL4        | 11 | 0.031976142 | 0.202359553 | 0.316049483 |
| cg10296867 | GAS7           | 17 | 0.000284686 | 0.604241819 | 0.759313489 |
| cg21089050 | GAS7           | 17 | 0.011846327 | 0.644133964 | 0.747475367 |
| cg17489908 | GATA3;GATA3    | 10 | 0.001256605 | 0.206399274 | 0.308857239 |
| cg00329157 | GCET2;GCET2    | 3  | 0.004264456 | 0.565370299 | 0.666365202 |
| cg02868790 | GCLC           | 6  | 0.019894596 | 0.307823973 | 0.46137705  |
| cg17240133 | GCOM1;GCOM     | 15 | 0.001024842 | 0.363201614 | 0.50485426  |
| cg01804528 | GDPD5          | 11 | 0.000570001 | 0.704617939 | 0.805722946 |
| cg25320328 | GFI1;GFI1      | 1  | 0.000214531 | 0.500805033 | 0.649780641 |
| cg26338723 | GFRA1;GFRA1;   | 10 | 0.024141668 | 0.392322553 | 0.497083383 |
| cg17337670 | GIT2;GIT2;GIT2 | 12 | 0.005431037 | 0.504746587 | 0.613000495 |
| cg08541962 | GJD4           | 10 | 0.0049525   | 0.373946423 | 0.483298475 |
| cg01791238 | GLI2           | 2  | 0.012370893 | 0.202131473 | 0.336109197 |
| cg03962451 | GLS            | 2  | 0.018637241 | 0.350110461 | 0.450544131 |
| cg25605307 | GLT25D2        | 1  | 0.020447901 | 0.291850986 | 0.424089523 |
| cg03704673 | GLTPD2;GLTPC   | 17 | 0.019539651 | 0.294778185 | 0.413243376 |
| cg16762849 | GMDS           | 6  | 0.013849047 | 0.253924246 | 0.398418806 |
| cg13394216 | GMDS           | 6  | 0.020342802 | 0.240610275 | 0.359492963 |
| cg14694205 | GMPS           | 3  | 0.03208434  | 0.31008192  | 0.455177268 |
| cg05308829 | GNA12          | 7  | 0.022529537 | 0.588187776 | 0.714433308 |
| cg06173857 | GNA12          | 7  | 0.019938902 | 0.672480372 | 0.782211394 |
| cg16433737 | GNB3           | 12 | 0.029215239 | 0.283823264 | 0.397062148 |
| cg08001559 | GNG2           | 14 | 0.033917644 | 0.294581467 | 0.400462121 |
| cg03070741 | GNG7           | 19 | 0.005244    | 0.583541193 | 0.709674384 |
| cg12435059 | GOLGA4         | 3  | 0.000260289 | 0.56426631  | 0.697481267 |
| cg16626318 | GOLGA4         | 3  | 0.029586669 | 0.469176121 | 0.569733541 |
| cg17346500 | GOLIM4         | 3  | 0.033598593 | 0.348276651 | 0.503040074 |
| cg27357134 | GOLIM4         | 3  | 0.018908396 | 0.389258104 | 0.525498934 |
| cg25189241 | GORASP2        | 2  | 0.010263693 | 0.627880127 | 0.729184358 |
| cg17676994 | GPC1           | 2  | 0.005115377 | 0.383130756 | 0.48348176  |
| cg11772527 | GPC6           | 13 | 0.011897273 | 0.232716842 | 0.419514527 |



|            |               |    |             |             |             |
|------------|---------------|----|-------------|-------------|-------------|
| cg20091187 | GPC6          | 13 | 0.001551137 | 0.433607046 | 0.580382184 |
| cg18880946 | GPC6          | 13 | 0.001512188 | 0.551882623 | 0.687515604 |
| cg06047020 | GPC6          | 13 | 0.009165681 | 0.232833347 | 0.364705758 |
| cg13393408 | GPR107;GPR10  | 9  | 0.022846725 | 0.43338118  | 0.565714926 |
| cg16204524 | GPR113        | 2  | 0.029572758 | 0.380428759 | 0.49930759  |
| cg27641482 | GPR124        | 8  | 0.001774731 | 0.516896392 | 0.656585043 |
| cg09103234 | GPR133        | 12 | 0.010716335 | 0.639222006 | 0.750794087 |
| cg14211097 | GPR135;GPR13  | 14 | 0.049026647 | 0.570769721 | 0.682466899 |
| cg05361273 | GPR17;LIMS2;G | 2  | 0.000225975 | 0.207032102 | 0.32494758  |
| cg11962524 | GPR44         | 11 | 0.031638296 | 0.634703692 | 0.737095066 |
| cg15390894 | GPR68         | 14 | 0.017176287 | 0.285295641 | 0.386097853 |
| cg04556210 | GPR77         | 19 | 0.009200763 | 0.477535782 | 0.6003914   |
| cg10451565 | GPR77         | 19 | 0.038335178 | 0.544847857 | 0.655276045 |
| cg18421360 | GPR98;GPR98   | 5  | 0.041810732 | 0.378147113 | 0.523722081 |
| cg14213590 | GPSM1         | 9  | 0.000539424 | 0.111618468 | 0.262834548 |
| cg14489965 | GPSM1;GPSM1   | 9  | 0.001909577 | 0.365529227 | 0.526104412 |
| cg14040131 | GPSM1;GPSM1   | 9  | 0.024575095 | 0.230897869 | 0.342201466 |
| cg15983520 | GPT           | 8  | 0.019844552 | 0.385826374 | 0.515836645 |
| cg07658280 | GPT           | 8  | 0.041671212 | 0.328233609 | 0.452718619 |
| cg05380921 | GPT2;GPT2     | 16 | 0.025547603 | 0.194733149 | 0.311614166 |
| cg07041565 | GRAMD2        | 15 | 0.013306894 | 0.486036559 | 0.640382398 |
| cg14605150 | GREM1         | 15 | 0.00754341  | 0.37402972  | 0.544333541 |
| cg00522048 | GRK5          | 10 | 3.82E-05    | 0.29394953  | 0.470931751 |
| cg23537932 | GRK5          | 10 | 0.000145062 | 0.478557084 | 0.653230239 |
| cg17897352 | GRK5          | 10 | 0.007756493 | 0.359228889 | 0.459920738 |
| cg04020590 | G RTP1        | 13 | 0.003537804 | 0.288866178 | 0.433410972 |
| cg01695643 | GSC           | 14 | 0.006207193 | 0.216323272 | 0.414808382 |
| cg23074992 | GSC           | 14 | 0.017475408 | 0.166562851 | 0.348974748 |
| cg15440688 | GSC           | 14 | 0.019412766 | 0.339968524 | 0.466897675 |
| cg13868361 | GTF2B         | 1  | 0.006352695 | 0.241488818 | 0.341520081 |
| cg05426006 | GTF2F2        | 13 | 0.022231612 | 0.611213498 | 0.71781208  |
| cg27372015 | GTF3C1        | 16 | 0.028538415 | 0.18721349  | 0.316676876 |
| cg16335858 | GYLTL1B       | 11 | 0.000249371 | 0.242008229 | 0.383687903 |
| cg27218796 | HAND2         | 4  | 0.014176238 | 0.174153186 | 0.344983105 |
| cg01566965 | HAND2         | 4  | 0.019043329 | 0.165502503 | 0.321042588 |
| cg01967399 | HAND2         | 4  | 0.013557942 | 0.21932438  | 0.369041469 |
| cg08297751 | HAND2         | 4  | 0.018269387 | 0.18182336  | 0.310986239 |
| cg10933003 | HAND2         | 4  | 0.009224042 | 0.13193058  | 0.249495572 |
| cg12828294 | HAS2          | 8  | 0.008316875 | 0.397007862 | 0.553998726 |
| cg24803059 | HCCA2         | 11 | 0.025771717 | 0.511666913 | 0.640324661 |
| cg03565674 | HCCA2         | 11 | 0.004153394 | 0.210017073 | 0.329900981 |
| cg15470102 | HCCA2         | 11 | 0.009888326 | 0.25772723  | 0.375373661 |
| cg25050723 | HCCA2;CTSD    | 11 | 0.023275252 | 0.260906823 | 0.400607307 |
| cg13978447 | HCCA2;LOC40   | 11 | 0.043561731 | 0.478514407 | 0.585057445 |
| cg25893831 | HDAC1         | 1  | 0.021119736 | 0.408740936 | 0.571062279 |
| cg03475776 | HDAC4         | 2  | 0.000628494 | 0.262039383 | 0.36634045  |

|            |                |    |             |             |             |
|------------|----------------|----|-------------|-------------|-------------|
| cg01743658 | HEATR5A        | 14 | 0.014728214 | 0.369317517 | 0.472760006 |
| cg02514318 | HECW2          | 2  | 0.044735102 | 0.32162413  | 0.433072724 |
| cg10839322 | HERC2          | 15 | 0.000114778 | 0.383907764 | 0.611417801 |
| cg25958716 | HIBCH;HIBCH    | 2  | 0.001792882 | 0.436544158 | 0.589635542 |
| cg00911794 | HIC1;HIC1      | 17 | 2.27E-06    | 0.393604629 | 0.554645295 |
| cg23621097 | HIC1;HIC1      | 17 | 2.96E-05    | 0.310951371 | 0.446199966 |
| cg24173182 | HIC1;HIC1      | 17 | 9.92E-06    | 0.572893066 | 0.678768643 |
| cg00008621 | HIF1A;HIF1A    | 14 | 0.00097795  | 0.31908541  | 0.444676202 |
| cg26025557 | HIGD1A;HIGD1   | 3  | 0.013813842 | 0.553299078 | 0.707106013 |
| cg16272084 | HIP1           | 7  | 0.03610927  | 0.30922813  | 0.43659645  |
| cg27169610 | HIVEP3;HIVEP3  | 1  | 0.027680954 | 0.515677169 | 0.628887385 |
| cg00542261 | HK1;HK1;HK1;H  | 10 | 0.031264663 | 0.146713608 | 0.280076742 |
| cg20520115 | HK2            | 2  | 0.000154325 | 0.216686792 | 0.33003044  |
| cg25149637 | HLA-C          | 6  | 0.019409668 | 0.571857126 | 0.694798794 |
| cg24389386 | HLA-H          | 6  | 0.001923522 | 0.600285084 | 0.749288503 |
| cg09515921 | HLX            | 1  | 0.023995    | 0.480093424 | 0.594301035 |
| cg14531576 | HMCN1;MIR54    | 1  | 0.021587425 | 0.167885445 | 0.281422535 |
| cg16965605 | HMGA2          | 12 | 0.029989366 | 0.3882751   | 0.527050402 |
| cg07355069 | HMGCS1;HMG     | 5  | 0.014728116 | 0.462234822 | 0.588253724 |
| cg03107888 | HOXA13         | 7  | 0.036410301 | 0.480527253 | 0.590802312 |
| cg19817912 | HOXA3          | 7  | 0.011081505 | 0.554678142 | 0.682156034 |
| cg07094847 | HOXA3;HOXA3    | 7  | 0.021870617 | 0.458291667 | 0.593921892 |
| cg20712820 | HOXA3;HOXA3    | 7  | 0.030640131 | 0.480989328 | 0.586832393 |
| cg12538674 | HOXA3;HOXA3    | 7  | 0.001018865 | 0.418046495 | 0.577569877 |
| cg26127662 | HOXA3;HOXA3    | 7  | 0.000931875 | 0.618724042 | 0.764982434 |
| cg07917150 | HOXA3;HOXA3    | 7  | 0.028884953 | 0.491087693 | 0.624223167 |
| cg24389585 | HOXA5          | 7  | 0.026069078 | 0.392115751 | 0.529370744 |
| cg19196335 | HOXA5          | 7  | 0.0226678   | 0.685180116 | 0.800419207 |
| cg14044640 | HOXA6          | 7  | 3.38E-06    | 0.114455988 | 0.264854688 |
| cg19183743 | HOXA6          | 7  | 2.22E-05    | 0.142430821 | 0.250541121 |
| cg23129930 | HOXA6          | 7  | 0.000598826 | 0.295563901 | 0.402678137 |
| cg17994139 | HOXA6          | 7  | 0.000213855 | 0.109963275 | 0.212372798 |
| cg00567703 | HOXC4;HOXC5    | 12 | 0.00035739  | 0.163391869 | 0.325590954 |
| cg19164987 | HOXC4;HOXC5    | 12 | 0.003468102 | 0.171974327 | 0.278781148 |
| cg22660542 | HOXC8          | 12 | 0.016232431 | 0.468965244 | 0.605853605 |
| cg02227188 | HOXC9          | 12 | 0.020976635 | 0.202505256 | 0.316163714 |
| cg00036110 | HPCAL4         | 1  | 0.013557063 | 0.28551699  | 0.397524347 |
| cg11416620 | HS6ST1         | 2  | 0.00030776  | 0.333897263 | 0.470047607 |
| cg05315365 | HSD17B2        | 16 | 0.014608055 | 0.25630825  | 0.361253479 |
| cg00672936 | HTRA4          | 8  | 2.84E-05    | 0.336925269 | 0.464973731 |
| cg04771100 | HTRA4          | 8  | 7.85E-05    | 0.118261052 | 0.223835785 |
| cg08898569 | HYLS1;HYLS1    | 11 | 0.038411444 | 0.291686637 | 0.403962641 |
| cg04359753 | ID4            | 6  | 0.000527436 | 0.13488632  | 0.270248282 |
| cg24850296 | IFLTD1;IFLTD1; | 12 | 0.027297399 | 0.534072286 | 0.637960897 |
| cg03065308 | IFNGR1         | 6  | 0.017826227 | 0.219258206 | 0.338385422 |
| cg02102832 | IFT140         | 16 | 0.041429308 | 0.512332496 | 0.647060477 |

|            |                 |    |             |             |             |
|------------|-----------------|----|-------------|-------------|-------------|
| cg12402183 | IGF1R           | 15 | 0.000707955 | 0.172521213 | 0.364509443 |
| cg02350767 | IGF1R           | 15 | 0.001755759 | 0.570295067 | 0.730495892 |
| cg03795574 | IGF1R           | 15 | 0.006624224 | 0.426875861 | 0.585025384 |
| cg08920032 | IGF1R           | 15 | 0.002651473 | 0.594710145 | 0.741500557 |
| cg20388729 | IGF1R           | 15 | 0.00533313  | 0.538566963 | 0.667562313 |
| cg08778287 | IGF1R           | 15 | 0.025160162 | 0.618912619 | 0.728970915 |
| cg00416645 | IGFBP5          | 2  | 0.032505511 | 0.472100879 | 0.586967682 |
| cg27292389 | IL15RA;IL15RA   | 10 | 0.01176566  | 0.496395061 | 0.637882803 |
| cg05042034 | IL16            | 15 | 0.041584254 | 0.379392945 | 0.490267402 |
| cg05860978 | IL17B           | 5  | 0.00604118  | 0.321046874 | 0.424249442 |
| cg26534425 | IL18            | 11 | 0.04257952  | 0.491770458 | 0.608103429 |
| cg13897122 | IL18RAP         | 2  | 0.004653251 | 0.234113381 | 0.371872382 |
| cg24394667 | IL1RL2          | 2  | 0.007570125 | 0.374928879 | 0.510861055 |
| cg06796611 | IL24;IL24;IL24; | 1  | 0.036594286 | 0.387339669 | 0.495281143 |
| cg12602851 | IMPG1           | 6  | 8.79E-05    | 0.565601483 | 0.66664533  |
| cg05132222 | INO80           | 15 | 0.038495104 | 0.278305956 | 0.378957995 |
| cg16228077 | INO80D          | 2  | 0.001521985 | 0.208082457 | 0.311830143 |
| cg16469046 | INPP4A;INPP4A;  | 2  | 0.024045499 | 0.276516449 | 0.408580195 |
| cg11555067 | INPP4A;INPP4A;  | 2  | 0.000264414 | 0.519994373 | 0.649905507 |
| cg03476007 | INPP4B;INPP4I   | 4  | 2.10E-05    | 0.206233553 | 0.365244022 |
| cg14953730 | INPP5A          | 10 | 5.52E-05    | 0.158843474 | 0.35582406  |
| cg12449716 | INPP5A          | 10 | 0.002323061 | 0.454055856 | 0.617089811 |
| cg02836764 | INPP5A          | 10 | 0.001865039 | 0.58475553  | 0.739603488 |
| cg26193427 | INPP5A          | 10 | 0.001610553 | 0.294547592 | 0.416249714 |
| cg12507869 | INPP5A          | 10 | 0.012565081 | 0.329856289 | 0.437582347 |
| cg02465282 | INPP5A          | 10 | 0.012701093 | 0.37669818  | 0.48005186  |
| cg21140843 | INPP5K;INPP5I   | 17 | 0.020078082 | 0.212604934 | 0.328839621 |
| cg06049367 | INSC;INSC       | 11 | 0.005792559 | 0.222414881 | 0.36285595  |
| cg25940517 | IQCD            | 12 | 0.028489212 | 0.274855854 | 0.378725192 |
| cg04919592 | IQCE;IQCE       | 7  | 0.000994434 | 0.238296803 | 0.355436011 |
| cg22581187 | IQGAP2          | 5  | 0.009891909 | 0.401306468 | 0.534649154 |
| cg26348614 | IQGAP2          | 5  | 0.014294088 | 0.400829212 | 0.525299371 |
| cg14283647 | IRS1            | 2  | 0.004774075 | 0.254961504 | 0.408552566 |
| cg13008631 | IRS1            | 2  | 0.002836712 | 0.276345745 | 0.400506982 |
| cg04129548 | IRS1            | 2  | 0.003367544 | 0.215714103 | 0.334823473 |
| cg00912573 | IRS1            | 2  | 0.028337145 | 0.281982258 | 0.390513715 |
| cg17848496 | IRS1            | 2  | 0.031292503 | 0.382213072 | 0.483320893 |
| cg27552679 | ISLR2;ISLR2;ISL | 15 | 0.000480936 | 0.324437409 | 0.430476931 |
| cg19650573 | ITGA11          | 15 | 0.000272237 | 0.568009917 | 0.69609722  |
| cg08446038 | ITGA2           | 5  | 0.021167934 | 0.2784111   | 0.40419095  |
| cg05742728 | ITGB2;ITGB2     | 21 | 0.025794221 | 0.553233158 | 0.67564759  |
| cg21105318 | ITGB6           | 2  | 0.002836712 | 0.622927829 | 0.726361135 |
| cg18994033 | ITM2C;ITM2C;    | 2  | 0.002930956 | 0.160648924 | 0.265517255 |
| cg16426321 | ITPK1;ITPK1;IT  | 14 | 0.018782227 | 0.534938023 | 0.640103775 |
| cg25338454 | ITPR2           | 12 | 0.000150404 | 0.737698138 | 0.845309187 |
| cg17052756 | JAZF1           | 7  | 0.002975878 | 0.504963362 | 0.618149765 |

|            |               |    |             |             |             |
|------------|---------------|----|-------------|-------------|-------------|
| cg06133771 | KATNB1        | 16 | 0.033340723 | 0.384145248 | 0.496117528 |
| cg14983936 | KCNH7         | 2  | 0.015743213 | 0.316756454 | 0.453639205 |
| cg12746557 | KCNJ15;KCNJ1  | 21 | 0.000628781 | 0.401113301 | 0.519594345 |
| cg08320524 | KCNJ15;KCNJ1  | 21 | 0.019267804 | 0.439136775 | 0.539985282 |
| cg21388745 | KCNK5         | 6  | 0.001608251 | 0.277570265 | 0.458690055 |
| cg14691388 | KCNK9         | 8  | 0.007536111 | 0.475810243 | 0.590570454 |
| cg26504422 | KCNN4         | 19 | 0.040921587 | 0.312902777 | 0.476627383 |
| cg04907802 | KCNQ1;KCNQ1   | 11 | 0.010395526 | 0.497955116 | 0.658893014 |
| cg08376310 | KCNQ1;KCNQ1   | 11 | 0.031854847 | 0.222515066 | 0.3231063   |
| cg02969426 | KCTD4;GTF2F2  | 13 | 1.95E-05    | 0.214823719 | 0.405909583 |
| cg19935055 | KDM2A;KDM2    | 11 | 0.009372976 | 0.567308114 | 0.705737065 |
| cg16062733 | KDM2B;KDM2    | 12 | 0.002346105 | 0.231959286 | 0.391280291 |
| cg11724984 | KDM2B;KDM2    | 12 | 0.001512188 | 0.53951669  | 0.651165121 |
| cg03358468 | KDM4B         | 19 | 0.002847458 | 0.349369672 | 0.54974186  |
| cg22079102 | KDM4B         | 19 | 0.009317051 | 0.37411237  | 0.483122411 |
| cg06884029 | KDM4B         | 19 | 0.018122452 | 0.604166054 | 0.712313351 |
| cg11782515 | KDM4B         | 19 | 0.015966223 | 0.763084857 | 0.864475574 |
| cg14161821 | KDM4C;KDM4    | 9  | 0.0007845   | 0.727074653 | 0.830422897 |
| cg24128630 | KDM6B;TMEM    | 17 | 0.007689895 | 0.664647958 | 0.774721288 |
| cg26723054 | KIAA0182;KIAA | 16 | 0.022509615 | 0.461470666 | 0.581013041 |
| cg05441854 | KIAA0182;KIAA | 16 | 0.003022657 | 0.320789606 | 0.425436005 |
| cg22455529 | KIAA0195      | 17 | 0.018861085 | 0.280750469 | 0.4067642   |
| cg03543954 | KIAA0513      | 16 | 0.000836043 | 0.584594121 | 0.703183172 |
| cg06407371 | KIAA0513      | 16 | 0.01982028  | 0.263379035 | 0.373499038 |
| cg05522042 | KIAA0513      | 16 | 0.010825398 | 0.158085221 | 0.260801891 |
| cg27498545 | KIAA0802      | 18 | 0.005847556 | 0.465190528 | 0.604375316 |
| cg03182584 | KIAA0895;KIAA | 7  | 8.51E-06    | 0.354457832 | 0.500815324 |
| cg17226446 | KIAA0922;KIAA | 4  | 0.000884727 | 0.203392878 | 0.385585592 |
| cg15733729 | KIAA1026;KIAA | 1  | 0.000107723 | 0.428195997 | 0.615780148 |
| cg19626253 | KIAA1026;KIAA | 1  | 0.037502775 | 0.602750691 | 0.730710738 |
| cg22723001 | KIAA1026;KIAA | 1  | 0.000293772 | 0.545251104 | 0.672482511 |
| cg02232840 | KIAA1026;KIAA | 1  | 7.97E-06    | 0.724142889 | 0.843088747 |
| cg12380772 | KIAA1161      | 9  | 0.004181989 | 0.169711389 | 0.275966166 |
| cg09579081 | KIAA1199      | 15 | 0.017794066 | 0.673639844 | 0.785262213 |
| cg13732302 | KIAA1267      | 17 | 0.001799405 | 0.399491203 | 0.532163528 |
| cg24350475 | KIAA1462      | 10 | 0.000133159 | 0.159353951 | 0.284188197 |
| cg19603836 | KIAA1462      | 10 | 0.046648757 | 0.48751294  | 0.594095967 |
| cg12478578 | KIAA1522      | 1  | 0.019088102 | 0.418733989 | 0.56077187  |
| cg16007395 | KIAA1522      | 1  | 0.007543009 | 0.510126212 | 0.614203357 |
| cg23977002 | KIDINS220     | 2  | 0.015986586 | 0.565293079 | 0.695156043 |
| cg10091458 | KIF12         | 9  | 0.000729865 | 0.646463532 | 0.754132934 |
| cg20147400 | KIF13B        | 8  | 2.27E-06    | 0.756523675 | 0.872401061 |
| cg09888753 | KIF13B        | 8  | 0.013761811 | 0.501181704 | 0.609165559 |
| cg26186408 | KIF2A;KIF2A   | 5  | 0.026907475 | 0.514607303 | 0.618343395 |
| cg02161701 | KIF7          | 15 | 0.0154304   | 0.46884949  | 0.589657186 |
| cg20176989 | KIR3DL2       | 19 | 0.034118471 | 0.422052548 | 0.529746971 |

|            |                |    |             |             |             |
|------------|----------------|----|-------------|-------------|-------------|
| cg14043104 | KLF12          | 13 | 0.000519283 | 0.50355474  | 0.629558902 |
| cg01179818 | KLHDC4         | 16 | 0.024394336 | 0.611474123 | 0.756118009 |
| cg01304993 | KLHDC4         | 16 | 0.021157388 | 0.448826533 | 0.549374732 |
| cg09502111 | KLHDC8A        | 1  | 0.034285256 | 0.560368534 | 0.669521609 |
| cg03445244 | KLHL29         | 2  | 0.012134422 | 0.282252446 | 0.430428691 |
| cg25560443 | KLHL29         | 2  | 6.01E-06    | 0.180444459 | 0.32040479  |
| cg27297315 | KLHL29         | 2  | 0.010228552 | 0.350981482 | 0.460600131 |
| cg00746446 | KLHL29         | 2  | 0.025624903 | 0.512320455 | 0.617326263 |
| cg14551881 | KLHL29         | 2  | 0.00464132  | 0.187017542 | 0.29118592  |
| cg04747180 | KLHL5;KLHL5;K  | 4  | 0.003652024 | 0.506729508 | 0.629715641 |
| cg15241779 | KLRD1;KLRD1;I  | 12 | 0.004769333 | 0.532803889 | 0.68323212  |
| cg04468334 | KRBA1          | 7  | 0.000640551 | 0.429265007 | 0.546010446 |
| cg04918314 | KRT75          | 12 | 0.016748449 | 0.576742204 | 0.69265019  |
| cg07636477 | KRT79          | 12 | 0.00416437  | 0.401709151 | 0.50379084  |
| cg13506670 | KTN1;C14orf35  | 14 | 0.039367467 | 0.341402196 | 0.442709803 |
| cg10191002 | LAG3           | 12 | 0.002407219 | 0.178345949 | 0.290505328 |
| cg09803764 | LAMB1          | 7  | 0.00218797  | 0.411299793 | 0.558059228 |
| cg19471856 | LAMB4          | 7  | 0.004470123 | 0.540011288 | 0.688414768 |
| cg01550161 | LAMB4          | 7  | 0.002257292 | 0.628745081 | 0.743795066 |
| cg13689073 | LARP1          | 5  | 0.039222094 | 0.124672218 | 0.231821539 |
| cg05380759 | LARS2          | 3  | 0.000424824 | 0.106376883 | 0.223142644 |
| cg09045552 | LASS6          | 2  | 8.15E-06    | 0.606772869 | 0.756928443 |
| cg08822578 | LATS2          | 13 | 0.035513361 | 0.527177264 | 0.636003881 |
| cg25589001 | LCOR;LCOR;LC   | 10 | 0.019590545 | 0.576332407 | 0.681361667 |
| cg00547480 | LDB1;LDB1      | 10 | 0.001532422 | 0.343824948 | 0.445746657 |
| cg17607330 | LDHA;LDHA;LE   | 11 | 0.02555741  | 0.362559008 | 0.472236662 |
| cg27179622 | LEFTY2         | 1  | 0.011696913 | 0.204827789 | 0.313246803 |
| cg14150727 | LGR6;LGR6;LG   | 1  | 0.000632124 | 0.231490752 | 0.350226796 |
| cg06817772 | LIMA1;LIMA1    | 12 | 0.000567209 | 0.305878554 | 0.42422426  |
| cg06354975 | LIMCH1;LIMCH   | 4  | 0.003226746 | 0.645204846 | 0.785231536 |
| cg01578293 | LIMCH1;LIMCH   | 4  | 0.011389263 | 0.517998223 | 0.639721653 |
| cg01942372 | LIMS1          | 2  | 0.003563552 | 0.41779141  | 0.574308776 |
| cg08441822 | LIPC           | 15 | 0.004119243 | 0.488747231 | 0.603767081 |
| cg25416605 | LIPG           | 18 | 0.003309353 | 0.285045295 | 0.41851104  |
| cg08972916 | LLGL2;LLGL2;LI | 17 | 0.026032853 | 0.354114876 | 0.471158639 |
| cg16515546 | LMF1           | 16 | 0.010252716 | 0.426603053 | 0.550759897 |
| cg04554272 | LMF1           | 16 | 0.001866714 | 0.386108827 | 0.495780065 |
| cg23886165 | LMO7           | 13 | 0.01012781  | 0.409875466 | 0.532694474 |
| cg06946543 | LMO7;LMO7      | 13 | 0.00499449  | 0.256464765 | 0.37590908  |
| cg15003194 | LOC100128239   | 11 | 0.000373084 | 0.458509553 | 0.589617166 |
| cg05304979 | LOC100129637   | 16 | 0.004581375 | 0.232351094 | 0.356278143 |
| cg01624637 | LOC100129637   | 16 | 0.036034067 | 0.44031752  | 0.551411298 |
| cg02272576 | LOC100132354   | 6  | 0.034767919 | 0.204106335 | 0.318012267 |
| cg04859117 | LOC100133549   | 11 | 0.01715518  | 0.33348371  | 0.487961523 |
| cg24143374 | LOC100133617   | 1  | 0.008036499 | 0.334787594 | 0.445570259 |
| cg04517258 | LOC100133669   | 8  | 0.031310688 | 0.197045521 | 0.316454563 |

|            |                |    |             |             |             |
|------------|----------------|----|-------------|-------------|-------------|
| cg25265234 | LOC100302640   | 3  | 0.034828721 | 0.330422351 | 0.445132315 |
| cg14892517 | LOC100302657   | 2  | 0.023290837 | 0.518317097 | 0.623291871 |
| cg27053629 | LOC145474      | 14 | 0.01723909  | 0.514385445 | 0.641665239 |
| cg23093870 | LOC145837      | 15 | 0.000247772 | 0.510430535 | 0.615188885 |
| cg22793142 | LOC148696      | 1  | 0.002736654 | 0.483781646 | 0.600784083 |
| cg24921186 | LOC153684      | 5  | 0.00027627  | 0.50107998  | 0.657420097 |
| cg07580867 | LOC283050;LC   | 10 | 0.004940142 | 0.314620283 | 0.467168162 |
| cg01291863 | LOC283332      | 12 | 0.026701761 | 0.493559168 | 0.614295547 |
| cg26616201 | LOC283867      | 16 | 0.001916157 | 0.244747368 | 0.370126784 |
| cg06306519 | LOC285074      | 2  | 0.02420259  | 0.453863538 | 0.565064158 |
| cg03772511 | LOC285419;LC   | 4  | 0.030823657 | 0.55571968  | 0.658216268 |
| cg24288715 | LOC285796      | 6  | 0.015145803 | 0.49255311  | 0.605779162 |
| cg11382529 | LOC401463      | 8  | 0.000253928 | 0.296054973 | 0.437346106 |
| cg00842231 | LOC55908;DO    | 19 | 0.000770524 | 0.518118131 | 0.637250249 |
| cg21424595 | LOC646762      | 7  | 0.000665345 | 0.426065513 | 0.573545866 |
| cg13750802 | LOC646982;LC   | 13 | 0.01210248  | 0.371379157 | 0.507269609 |
| cg08569979 | LOC646982;LC   | 13 | 0.012871732 | 0.387727531 | 0.507733338 |
| cg13159985 | LOC646982;LC   | 13 | 0.000823477 | 0.706285111 | 0.807523996 |
| cg16314851 | LOC723809      | 7  | 0.041155941 | 0.304507406 | 0.450231452 |
| cg06768079 | LOXL2          | 8  | 0.029433901 | 0.41356792  | 0.552112333 |
| cg00326251 | LOXL2          | 8  | 0.000224798 | 0.285225233 | 0.405137984 |
| cg21422605 | LPAR3          | 1  | 0.000683849 | 0.328136599 | 0.451660443 |
| cg00281273 | LPCAT1         | 5  | 0.001232932 | 0.186782475 | 0.314628394 |
| cg15052335 | LPIN2;LPIN2    | 18 | 0.01349356  | 0.328650513 | 0.46226221  |
| cg11198596 | LRIG1          | 3  | 0.001417556 | 0.100650611 | 0.23100465  |
| cg16931822 | LRIG1          | 3  | 0.018338726 | 0.516836188 | 0.641820475 |
| cg16409259 | LRP5           | 11 | 0.008699203 | 0.242221117 | 0.397289926 |
| cg13738327 | LRP5           | 11 | 0.018282774 | 0.302726851 | 0.457044387 |
| cg12832726 | LRP5           | 11 | 0.000463686 | 0.106075792 | 0.21104996  |
| cg11950754 | LRP8;LRP8;LRP  | 1  | 0.002635339 | 0.262220126 | 0.428612617 |
| cg27022531 | LRRC1          | 6  | 0.005710525 | 0.299320628 | 0.415267525 |
| cg26466258 | LRRC14B        | 5  | 0.010066284 | 0.644562321 | 0.747645684 |
| cg17031967 | LRRC16A        | 6  | 0.016176006 | 0.406512776 | 0.548054772 |
| cg16875182 | LRRC2;TDGF1;   | 3  | 0.001080098 | 0.299769225 | 0.423115094 |
| cg07566790 | LRRC48;LRRC4   | 17 | 0.021702738 | 0.255887493 | 0.356944678 |
| cg17718703 | LRRC8D;LRRC8   | 1  | 0.030960168 | 0.359307915 | 0.493490491 |
| cg15579587 | LRRFIP1;LRRFII | 2  | 0.000102627 | 0.367452597 | 0.491224658 |
| cg07165120 | LRRK1          | 15 | 0.02539017  | 0.237359202 | 0.387857695 |
| cg01330815 | LRRN2;LRRN2    | 1  | 0.034674001 | 0.447315491 | 0.555159682 |
| cg09245582 | LSM4           | 19 | 0.015033657 | 0.386861983 | 0.534805485 |
| cg13432911 | LSM6           | 4  | 0.005911757 | 0.60913359  | 0.72932086  |
| cg23272978 | LTBP3;LTBP3;L  | 11 | 0.004978935 | 0.489304387 | 0.597007323 |
| cg19753174 | LYPLAL1        | 1  | 0.014855871 | 0.208057346 | 0.342288899 |
| cg02357637 | LYSMD4         | 15 | 0.009674064 | 0.199590917 | 0.304736125 |
| cg24704593 | MACC1          | 7  | 0.013478846 | 0.484876408 | 0.613280266 |
| cg03840849 | MACC1          | 7  | 0.006591112 | 0.471626391 | 0.579638462 |

|            |              |    |             |             |             |
|------------|--------------|----|-------------|-------------|-------------|
| cg04683210 | MACROD1      | 11 | 0.007920225 | 0.334686037 | 0.515445833 |
| cg19324462 | MACROD1      | 11 | 0.00480381  | 0.36030931  | 0.509343155 |
| cg09705456 | MACROD1      | 11 | 0.005485428 | 0.560523565 | 0.668111357 |
| cg16222367 | MAD1L1;MAD   | 7  | 0.00929332  | 0.350894692 | 0.505266519 |
| cg17103856 | MAD1L1;MAD   | 7  | 0.006508834 | 0.457878021 | 0.596683535 |
| cg21004924 | MAD1L1;MAD   | 7  | 0.008116924 | 0.468033777 | 0.606773764 |
| cg22963979 | MAD1L1;MAD   | 7  | 0.016461817 | 0.213869374 | 0.352525442 |
| cg06994282 | MAD1L1;MAD   | 7  | 1.46E-05    | 0.621386738 | 0.758042007 |
| cg08722586 | MAD1L1;MAD   | 7  | 4.27E-05    | 0.564812845 | 0.693403497 |
| cg25744355 | MAD1L1;MAD   | 7  | 0.036199165 | 0.209144888 | 0.322593343 |
| cg17551891 | MAD1L1;MAD   | 7  | 0.005353266 | 0.642238844 | 0.752718134 |
| cg27238358 | MAD1L1;MAD   | 7  | 0.000947134 | 0.552095672 | 0.661981343 |
| cg24295561 | MAD1L1;MAD   | 7  | 0.015138641 | 0.391702331 | 0.498714905 |
| cg19624444 | MAD1L1;MAD   | 7  | 0.001836677 | 0.233135198 | 0.339726331 |
| cg03043709 | MAD1L1;MAD   | 7  | 0.000106049 | 0.701114003 | 0.80536549  |
| cg26672959 | MAGI1;MAGI1  | 3  | 0.004548588 | 0.43919449  | 0.541297636 |
| cg18405299 | MAGI2        | 7  | 0.030911853 | 0.385469646 | 0.511369764 |
| cg19755714 | MAML3        | 4  | 0.0275256   | 0.428234983 | 0.53762881  |
| cg24661274 | MAP1B        | 5  | 0.002602803 | 0.378657993 | 0.537195572 |
| cg26779305 | MAP2K4;MIR7  | 17 | 0.036214931 | 0.167516519 | 0.277318799 |
| cg02634454 | MAP4;MAP4    | 3  | 0.011067944 | 0.477062082 | 0.587045354 |
| cg18013356 | MAP4K2       | 11 | 0.044305472 | 0.593171457 | 0.69713358  |
| cg18489755 | MAP6D1       | 3  | 0.017360264 | 0.153536294 | 0.263158128 |
| cg14622443 | MARCH10      | 17 | 0.022686524 | 0.329071852 | 0.432199261 |
| cg18640536 | MARCH3       | 5  | 0.025232497 | 0.192554687 | 0.327059082 |
| cg18140824 | MASP1;MASP1  | 3  | 0.043474485 | 0.342809631 | 0.476058435 |
| cg19458529 | MAST4;MAST4  | 5  | 0.000162138 | 0.324055374 | 0.448642117 |
| cg21745307 | MATN4;RBPJL; | 20 | 0.001177156 | 0.385606312 | 0.547608784 |
| cg12429065 | MB           | 22 | 0.019040947 | 0.234409045 | 0.384340043 |
| cg25006077 | MBNL1;MBNL1  | 3  | 0.002787342 | 0.094025953 | 0.224195035 |
| cg11862665 | MBNL2;MBNL2  | 13 | 0.001289184 | 0.438245074 | 0.591938098 |
| cg07289766 | MBNL2;MBNL2  | 13 | 0.036756489 | 0.525632648 | 0.634998951 |
| cg26358590 | MBP;MBP      | 18 | 0.000736656 | 0.690743446 | 0.80218145  |
| cg15730074 | MCF2L;MCF2L  | 13 | 0.009057986 | 0.557678876 | 0.691056004 |
| cg10588471 | MCF2L;MCF2L  | 13 | 0.014722349 | 0.444295606 | 0.551175    |
| cg16043368 | MCF2L;MCF2L  | 13 | 0.004286607 | 0.458157163 | 0.563153929 |
| cg24796644 | MDGA1        | 6  | 3.63E-05    | 0.43231757  | 0.539695171 |
| cg12328429 | ME3;ME3;ME3  | 11 | 0.005469098 | 0.419168253 | 0.569743132 |
| cg21067465 | ME3;ME3;ME3  | 11 | 0.005485142 | 0.439074804 | 0.575642003 |
| cg09416908 | ME3;ME3;ME3  | 11 | 0.035159281 | 0.361734347 | 0.475781672 |
| cg20777829 | MED13L       | 12 | 0.001818583 | 0.238012976 | 0.371447817 |
| cg15412772 | MED24;MED24  | 17 | 7.89E-05    | 0.111332769 | 0.247674956 |
| cg09550083 | MEIS1        | 2  | 0.026269544 | 0.207668346 | 0.391133889 |
| cg05877497 | MEIS1        | 2  | 0.030867531 | 0.096565686 | 0.266988641 |
| cg01271812 | MEIS1        | 2  | 0.025496974 | 0.126579741 | 0.283954263 |
| cg06833110 | MEIS1        | 2  | 0.018507085 | 0.092139825 | 0.242865736 |

|            |               |    |             |             |             |
|------------|---------------|----|-------------|-------------|-------------|
| cg26537478 | MEIS1         | 2  | 0.03446599  | 0.110112135 | 0.256894981 |
| cg09535924 | MEIS1         | 2  | 0.048581068 | 0.218022354 | 0.354196071 |
| cg12082609 | MEIS1         | 2  | 0.034344805 | 0.121548304 | 0.25673156  |
| cg10464312 | MEIS1         | 2  | 0.040577356 | 0.17336793  | 0.306172605 |
| cg23398076 | MEIS1         | 2  | 0.0077635   | 0.093671337 | 0.218742098 |
| cg11433622 | MEIS1         | 2  | 0.023325203 | 0.070867734 | 0.19478847  |
| cg17107572 | MEIS1         | 2  | 0.025217098 | 0.058401566 | 0.178327985 |
| cg22731271 | MEIS1         | 2  | 0.029215239 | 0.107161545 | 0.224043694 |
| cg17945976 | MEIS1         | 2  | 0.045465711 | 0.05555594  | 0.171187531 |
| cg08238215 | MEIS1         | 2  | 0.020620548 | 0.121356212 | 0.233236861 |
| cg00995986 | MEIS1         | 2  | 0.020389595 | 0.068679135 | 0.18027142  |
| cg23972738 | MEIS1         | 2  | 0.046509667 | 0.091202285 | 0.201101177 |
| cg21177426 | MEIS2;MEIS2;I | 15 | 0.002472404 | 0.23197456  | 0.468328285 |
| cg26708220 | MEIS2;MEIS2;I | 15 | 0.003288448 | 0.159023825 | 0.304122211 |
| cg19010490 | MEIS2;MEIS2;I | 15 | 0.026921356 | 0.269010773 | 0.412346205 |
| cg13181164 | MEIS2;MEIS2;I | 15 | 0.017009848 | 0.097028398 | 0.233033178 |
| cg15902390 | MEIS2;MEIS2;I | 15 | 0.007101507 | 0.132876481 | 0.268720003 |
| cg23677243 | MEIS2;MEIS2;I | 15 | 0.000709763 | 0.16468712  | 0.299366272 |
| cg13181974 | MEIS2;MEIS2;I | 15 | 0.017577555 | 0.111983208 | 0.239075434 |
| cg02377544 | MEIS2;MEIS2;I | 15 | 0.028690784 | 0.302145493 | 0.418400411 |
| cg00691830 | MEIS2;MEIS2;I | 15 | 0.007877167 | 0.095929696 | 0.199114487 |
| cg25447144 | MEIS2;MEIS2;I | 15 | 0.019785013 | 0.530562915 | 0.63285265  |
| cg26585007 | MERTK         | 2  | 0.019046024 | 0.539563102 | 0.64998279  |
| cg03260530 | METRNL        | 17 | 0.019651366 | 0.272126709 | 0.401836895 |
| cg01574390 | METTL9;METT   | 16 | 0.000860898 | 0.220022822 | 0.338880305 |
| cg11717597 | MEX3A         | 1  | 0.000539146 | 0.186485023 | 0.308886769 |
| cg09831055 | MEX3A         | 1  | 0.025820492 | 0.460760906 | 0.566697653 |
| cg13870275 | MFAP3L;MFAP   | 4  | 0.000907999 | 0.368615899 | 0.528396504 |
| cg04498801 | MFSD10;MFSC   | 4  | 0.029789719 | 0.476096863 | 0.577490975 |
| cg15394255 | MGAT4C        | 12 | 0.00813935  | 0.439667184 | 0.598992443 |
| cg07382437 | MGC14436;MGC  | 12 | 0.005013231 | 0.436560225 | 0.556463053 |
| cg01254644 | MGC15885      | 15 | 0.006480493 | 0.479989558 | 0.592492172 |
| cg22559013 | MGC27382      | 1  | 0.000244716 | 0.525483394 | 0.653709443 |
| cg17761538 | MGC70857;LR   | 8  | 0.005542799 | 0.472832083 | 0.590676518 |
| cg07638938 | MGMT          | 10 | 0.002836712 | 0.350230983 | 0.500209909 |
| cg10505257 | MGRN1;MGRN    | 16 | 0.031690649 | 0.238280572 | 0.357420573 |
| cg01156249 | MGRN1;MGRN    | 16 | 0.011469181 | 0.309880342 | 0.427236199 |
| cg02492818 | MICALL2       | 7  | 0.039794181 | 0.459350016 | 0.571708833 |
| cg02759751 | MICALL2       | 7  | 0.034543674 | 0.539975137 | 0.647497656 |
| cg15857635 | MICALL2       | 7  | 0.017955692 | 0.602632518 | 0.705620106 |
| cg01940297 | MIR1207;PVT1  | 8  | 0.00339825  | 0.476129292 | 0.62939158  |
| cg07281938 | MIR140;WWP1   | 16 | 0.001407052 | 0.225083561 | 0.395991471 |
| cg00699693 | MIR140;WWP1   | 16 | 0.021194991 | 0.202223502 | 0.338168373 |
| cg03549146 | MIR140;WWP1   | 16 | 0.000310444 | 0.111179875 | 0.233661475 |
| cg03417340 | MIR140;WWP1   | 16 | 0.020168152 | 0.121837363 | 0.230787531 |
| cg15426815 | MIR200C       | 12 | 0.005377492 | 0.400175331 | 0.512824617 |



|            |               |    |             |             |             |
|------------|---------------|----|-------------|-------------|-------------|
| cg02268620 | MIR24-1;C9orf | 9  | 0.009948342 | 0.614183265 | 0.733851431 |
| cg04522625 | MIR548A2      | 3  | 0.008744587 | 0.447612667 | 0.579330594 |
| cg14048837 | MIR548Q;ZNF4  | 9  | 0.001736213 | 0.556649232 | 0.687790624 |
| cg18156845 | MIR744;MAP2   | 17 | 0.000589934 | 0.345719022 | 0.559511427 |
| cg08652499 | MITF;MITF;MI  | 3  | 0.000360517 | 0.367585864 | 0.491188748 |
| cg18503031 | MITF;MITF;MI  | 3  | 5.20E-05    | 0.616382088 | 0.729485218 |
| cg00434573 | MKNK2;MKNK    | 19 | 0.00027078  | 0.256631182 | 0.369188593 |
| cg07746514 | MLEC          | 12 | 0.009120781 | 0.491377664 | 0.620851575 |
| cg25076197 | MLL5;MLL5     | 7  | 0.015499645 | 0.285781865 | 0.428675623 |
| cg06639874 | MLPH;MLPH     | 2  | 0.013332275 | 0.624468004 | 0.747254728 |
| cg07072391 | MLPH;MLPH     | 2  | 0.000938025 | 0.586335105 | 0.699894171 |
| cg12854428 | MMP16;MMP1    | 8  | 0.000205017 | 0.631472558 | 0.745360442 |
| cg05270866 | MMP28         | 17 | 0.033914398 | 0.662742537 | 0.769665377 |
| cg14589810 | MMP28         | 17 | 0.013725329 | 0.388155758 | 0.488185008 |
| cg00514241 | MN1           | 22 | 0.023167291 | 0.434217974 | 0.573590071 |
| cg06004017 | MN1           | 22 | 0.01508316  | 0.323529788 | 0.44058953  |
| cg08868601 | MORN1         | 1  | 0.028924973 | 0.38689338  | 0.499958619 |
| cg02473847 | MORN1;LOC10   | 1  | 5.04E-05    | 0.454944039 | 0.651775916 |
| cg09811127 | MORN1;LOC10   | 1  | 0.001906863 | 0.454496988 | 0.581591138 |
| cg14133850 | MPP7          | 10 | 0.007152857 | 0.394590879 | 0.567340266 |
| cg15406585 | MPP7          | 10 | 0.001774731 | 0.592561121 | 0.711105793 |
| cg16527477 | MPP7          | 10 | 0.042554021 | 0.246109933 | 0.357346215 |
| cg23508908 | MRAP2         | 6  | 0.043136977 | 0.411985938 | 0.523536061 |
| cg10119160 | MREG          | 2  | 0.00124537  | 0.591907235 | 0.69519402  |
| cg15897435 | MRPL1         | 4  | 0.031236217 | 0.145192175 | 0.351981074 |
| cg00510149 | MRVI1;MRVI1;  | 11 | 0.000139435 | 0.40306369  | 0.586298977 |
| cg07861448 | MSC           | 8  | 0.000975879 | 0.198365083 | 0.333438253 |
| cg26794715 | MSC           | 8  | 0.000199677 | 0.24838223  | 0.358074283 |
| cg13654836 | MSI2;MSI2     | 17 | 0.001066383 | 0.202112575 | 0.35338197  |
| cg12441066 | MSI2;MSI2     | 17 | 0.008962803 | 0.634403419 | 0.760968919 |
| cg06966839 | MSI2;MSI2     | 17 | 0.002431457 | 0.698852689 | 0.801874661 |
| cg08677210 | MSI2;MSI2     | 17 | 0.034050048 | 0.377685092 | 0.480135377 |
| cg21538208 | MSX1          | 4  | 0.000140459 | 0.213895058 | 0.367051602 |
| cg09748975 | MSX1          | 4  | 0.011510744 | 0.368606825 | 0.489675366 |
| cg18920088 | MTHFD1L       | 6  | 0.015756377 | 0.25543505  | 0.420359839 |
| cg24683185 | MTMR15        | 15 | 0.021548823 | 0.304185473 | 0.435922794 |
| cg07128900 | MTSS1L        | 16 | 0.019590545 | 0.549594097 | 0.658078232 |
| cg07813065 | MTSS1L        | 16 | 0.019070095 | 0.357756609 | 0.463317406 |
| cg01304894 | MTSS1L        | 16 | 0.028375155 | 0.304900801 | 0.409510176 |
| cg06722630 | MUC12;MUC1    | 7  | 0.000140489 | 0.399766846 | 0.523148213 |
| cg25566714 | MUM1;MUM1     | 19 | 0.002820889 | 0.717590418 | 0.843128367 |
| cg13986417 | MVK;MMAB;N    | 12 | 0.002781413 | 0.514539429 | 0.657832959 |
| cg17797848 | MYBPHL        | 1  | 0.03079154  | 0.527413066 | 0.658248014 |
| cg25930644 | MYH10         | 17 | 0.007684906 | 0.352058837 | 0.472313394 |
| cg10123201 | MYL3          | 3  | 0.007091623 | 0.350229261 | 0.47272583  |
| cg25513776 | MYLK4         | 6  | 0.003623655 | 0.51383964  | 0.669337395 |

|            |              |    |             |             |             |
|------------|--------------|----|-------------|-------------|-------------|
| cg20029153 | MYO18A;MYO   | 17 | 0.004846976 | 0.182920354 | 0.317001115 |
| cg15799605 | MYO1D        | 17 | 0.00442044  | 0.276857694 | 0.407896368 |
| cg22031252 | MYO1D        | 17 | 0.008457061 | 0.367076741 | 0.473766041 |
| cg14100211 | MYO9A;SENP8  | 15 | 0.00361097  | 0.427640425 | 0.579175936 |
| cg11424828 | MYOM2        | 8  | 0.031976142 | 0.142334245 | 0.295426991 |
| cg21847720 | MYOM2        | 8  | 0.00751785  | 0.070570163 | 0.192482211 |
| cg19368031 | MYST4        | 10 | 0.000253928 | 0.387819429 | 0.563799478 |
| cg06098530 | MYST4        | 10 | 0.000931376 | 0.272447609 | 0.414994861 |
| cg11849327 | MYST4        | 10 | 0.018662624 | 0.346107662 | 0.478035537 |
| cg20721467 | MYST4        | 10 | 0.000458204 | 0.327083423 | 0.457072588 |
| cg15067606 | NAA50        | 3  | 0.008910952 | 0.25074182  | 0.379429268 |
| cg16204989 | NALCN        | 13 | 0.016510842 | 0.384127778 | 0.488010592 |
| cg04277574 | NAV1         | 1  | 0.000100772 | 0.639668102 | 0.802920964 |
| cg14969261 | NAV2         | 11 | 0.008408817 | 0.306125067 | 0.463607349 |
| cg24137774 | NAV2         | 11 | 0.005516871 | 0.520699785 | 0.628441482 |
| cg23371436 | NAV2;NAV2;N  | 11 | 0.003016714 | 0.28931753  | 0.426832445 |
| cg01816186 | NBAS         | 2  | 0.002539921 | 0.329554571 | 0.494134259 |
| cg27110054 | NCALD;NCALD  | 8  | 0.00013064  | 0.170298215 | 0.271710809 |
| cg21160372 | NCAM2        | 21 | 0.003713714 | 0.337172835 | 0.437190186 |
| cg19865916 | NCDN;NCDN;N  | 1  | 0.001091572 | 0.398000125 | 0.55653301  |
| cg02099877 | NCEH1;NCEH1  | 3  | 0.006062957 | 0.243987442 | 0.368995542 |
| cg01579216 | NCF2;NCF2    | 1  | 0.009200763 | 0.232264176 | 0.368512035 |
| cg03729042 | NCF2;NCF2    | 1  | 0.032111096 | 0.288147367 | 0.404760839 |
| cg26428069 | NCKAP5;NCKA  | 2  | 0.019377585 | 0.293378395 | 0.41693503  |
| cg27044649 | NCOR2;NCOR2  | 12 | 0.002318658 | 0.293172389 | 0.47231262  |
| cg20494738 | NCOR2;NCOR2  | 12 | 0.000775846 | 0.587482924 | 0.766608323 |
| cg11197258 | NCOR2;NCOR2  | 12 | 0.014774313 | 0.222676092 | 0.387851487 |
| cg10996589 | NCOR2;NCOR2  | 12 | 0.004375526 | 0.293613253 | 0.452284289 |
| cg19341309 | NCOR2;NCOR2  | 12 | 0.01016484  | 0.181225446 | 0.306130313 |
| cg22611259 | NCOR2;NCOR2  | 12 | 5.26E-05    | 0.677247477 | 0.790546104 |
| cg23128949 | NCOR2;NCOR2  | 12 | 0.001811824 | 0.538123368 | 0.643961272 |
| cg11607710 | NCOR2;NCOR2  | 12 | 0.027512219 | 0.413337805 | 0.514579854 |
| cg04579183 | NCRNA00052   | 15 | 0.006893737 | 0.409116932 | 0.616696201 |
| cg17519645 | NCRNA00085   | 19 | 0.000700227 | 0.138612071 | 0.246761193 |
| cg10859327 | NCRNA00093;I | 10 | 0.049743819 | 0.215496547 | 0.377915247 |
| cg02983759 | NCRNA00111   | 21 | 0.001009975 | 0.308780424 | 0.429598636 |
| cg01753209 | NCRNA00111   | 21 | 0.000391538 | 0.369746566 | 0.470682019 |
| cg13049432 | NCRNA00114;I | 21 | 0.032108071 | 0.481862998 | 0.589176014 |
| cg01828328 | NDRG1;NDRG1  | 8  | 0.003228523 | 0.480891341 | 0.582486085 |
| cg16674484 | NDST1        | 5  | 0.002574412 | 0.199817697 | 0.332034354 |
| cg06677890 | NDST1        | 5  | 0.000425843 | 0.115946997 | 0.229263214 |
| cg16018002 | NEDD9        | 6  | 0.004401874 | 0.626960574 | 0.727128435 |
| cg25408950 | NEK7         | 1  | 0.026936379 | 0.675904267 | 0.77672185  |
| cg11706790 | NEU4;NEU4    | 2  | 0.001608251 | 0.380855248 | 0.560310348 |
| cg16660312 | NEU4;NEU4    | 2  | 0.000380013 | 0.271365169 | 0.426032992 |
| cg10504150 | NEU4;NEU4    | 2  | 0.001101047 | 0.509795466 | 0.639419218 |

|            |              |    |             |             |             |
|------------|--------------|----|-------------|-------------|-------------|
| cg24429037 | NEU4;NEU4    | 2  | 0.005714077 | 0.44865005  | 0.577291211 |
| cg18095041 | NEU4;NEU4    | 2  | 0.003200997 | 0.338379335 | 0.463377101 |
| cg22399646 | NEU4;NEU4;NI | 2  | 0.001132461 | 0.593013513 | 0.717157083 |
| cg20791593 | NEU4;NEU4;NI | 2  | 0.030190573 | 0.223241606 | 0.333153218 |
| cg13098379 | NFASC;NFASC; | 1  | 0.048581068 | 0.481849816 | 0.600242718 |
| cg27426044 | NFASC;NFASC; | 1  | 0.010408838 | 0.317955354 | 0.418162253 |
| cg04110750 | NFAT5;NFAT5; | 16 | 0.029176731 | 0.256222674 | 0.410471107 |
| cg14715383 | NFATC1;NFATC | 18 | 0.016620703 | 0.303286296 | 0.452435012 |
| cg16536399 | NFATC1;NFATC | 18 | 0.002547534 | 0.273059589 | 0.415041031 |
| cg05718035 | NFATC1;NFATC | 18 | 0.006226904 | 0.297540745 | 0.414379324 |
| cg15517343 | NFATC1;NFATC | 18 | 0.026148648 | 0.419737333 | 0.527668429 |
| cg23240477 | NFATC1;NFATC | 18 | 0.023382676 | 0.181692389 | 0.287475305 |
| cg07342752 | NFATC1;NFATC | 18 | 0.000930639 | 0.40135632  | 0.596237785 |
| cg23384027 | NFE2;NFE2    | 12 | 0.000266325 | 0.256681993 | 0.385022757 |
| cg09773897 | NFIC         | 19 | 0.008725087 | 0.386752156 | 0.500889679 |
| cg13649253 | NFIX         | 19 | 0.011373085 | 0.262222431 | 0.39622288  |
| cg11135080 | NFYC;NFYC;NF | 1  | 0.021608959 | 0.411480134 | 0.534074059 |
| cg26152051 | NHEJ1        | 2  | 0.002487806 | 0.486040739 | 0.652997188 |
| cg03438773 | NHEJ1        | 2  | 0.000905894 | 0.290459499 | 0.428135939 |
| cg06132620 | NHSL1;NHSL1; | 6  | 0.043412301 | 0.494467954 | 0.61632684  |
| cg07573797 | NIPA1;NIPA1  | 15 | 0.001525471 | 0.737000809 | 0.858715498 |
| cg13386926 | NIPAL4       | 5  | 0.022819511 | 0.634280287 | 0.757165127 |
| cg05475440 | NLK          | 17 | 0.021794138 | 0.382229362 | 0.487266246 |
| cg09624807 | NLRC5        | 16 | 0.001585583 | 0.343417238 | 0.509436738 |
| cg14528979 | NOTCH1       | 9  | 0.01318878  | 0.290437232 | 0.498211046 |
| cg14494733 | NOTCH1       | 9  | 0.007322273 | 0.320045109 | 0.52428962  |
| cg21245132 | NOTCH1       | 9  | 0.000251179 | 0.587406285 | 0.733777424 |
| cg13613245 | NOTCH1       | 9  | 0.019027757 | 0.422010908 | 0.568113103 |
| cg14205001 | NOTCH1       | 9  | 0.0040926   | 0.583805767 | 0.703048394 |
| cg23156439 | NPFFR1       | 10 | 0.007733218 | 0.62113643  | 0.728600905 |
| cg22082015 | NR1D1        | 17 | 0.000254433 | 0.345785538 | 0.499320407 |
| cg02863947 | NR1I2;NR1I2  | 3  | 0.001293444 | 0.687113146 | 0.795047576 |
| cg17841545 | NRAP;NRAP    | 10 | 0.006992343 | 0.3745611   | 0.52925712  |
| cg20712980 | NRF1;NRF1    | 7  | 0.006315762 | 0.254854197 | 0.370819004 |
| cg03896273 | NRF1;NRF1    | 7  | 0.005052758 | 0.563942832 | 0.670744708 |
| cg05802704 | NRG3;NRG3;N  | 10 | 0.0256188   | 0.382042882 | 0.482947293 |
| cg21660452 | NRXN2;NRXN2  | 11 | 0.011486078 | 0.425789969 | 0.580955074 |
| cg09803321 | NT5C2;NT5C2  | 10 | 5.08E-05    | 0.142848961 | 0.243255728 |
| cg25064331 | NT5C3;NT5C3; | 7  | 0.011720613 | 0.33307238  | 0.467778142 |
| cg12620806 | NTF3;NTF3    | 12 | 0.017002334 | 0.420737333 | 0.568843135 |
| cg02926307 | NUAK1        | 12 | 0.014596215 | 0.193335078 | 0.313051361 |
| cg20075675 | NUAK1        | 12 | 3.91E-05    | 0.497371112 | 0.609333347 |
| cg13301931 | NUDCD3       | 7  | 0.006668209 | 0.51514703  | 0.615386029 |
| cg20633370 | NXN          | 17 | 0.007454281 | 0.440772082 | 0.584597964 |
| cg19669385 | NXN          | 17 | 0.041126563 | 0.291782989 | 0.421172492 |
| cg24101979 | NXN          | 17 | 0.009783689 | 0.352114292 | 0.470937289 |

|            |               |    |             |             |             |
|------------|---------------|----|-------------|-------------|-------------|
| cg19956147 | NXN           | 17 | 0.014481784 | 0.172789181 | 0.276477976 |
| cg19775582 | ODZ2          | 5  | 0.000978657 | 0.678618578 | 0.781089892 |
| cg19468534 | OIP5;NUSAP1;  | 15 | 0.018616109 | 0.341369319 | 0.454271478 |
| cg13822849 | OLFM1         | 9  | 0.000700541 | 0.32117516  | 0.487587694 |
| cg04370634 | OSBPL10       | 3  | 0.003880599 | 0.580289896 | 0.684151829 |
| cg05358575 | OTOF          | 2  | 0.000885129 | 0.578464061 | 0.699978285 |
| cg23675000 | OTUD7A        | 15 | 0.000949348 | 0.49113924  | 0.613933527 |
| cg09428340 | PACRG;PACRG   | 6  | 0.012766495 | 0.356455049 | 0.468176267 |
| cg15976636 | PACRG;PARK2;  | 6  | 0.000459882 | 0.489119925 | 0.610484015 |
| cg07521618 | PACS2;PACS2   | 14 | 0.004653975 | 0.278674931 | 0.399488993 |
| cg27545565 | PALLD;PALLD;f | 4  | 0.006269444 | 0.344389274 | 0.505284315 |
| cg16633925 | PALM;PALM     | 19 | 0.004508356 | 0.691162577 | 0.846821203 |
| cg21204870 | PALM2;PALM2   | 9  | 0.015765973 | 0.53787947  | 0.673091706 |
| cg17259761 | PAM;PAM;PAM   | 5  | 0.014737554 | 0.526637065 | 0.628817438 |
| cg22365313 | PAPSS1        | 4  | 0.033657763 | 0.43485468  | 0.545444003 |
| cg09720012 | PAPSS1        | 4  | 0.038145562 | 0.521699188 | 0.625198071 |
| cg11646078 | PARD3         | 10 | 0.000459033 | 0.51790351  | 0.628339861 |
| cg08623277 | PARD3B;PARD   | 2  | 0.031799919 | 0.531353581 | 0.659474212 |
| cg21038418 | PARD3B;PARD   | 2  | 0.001213293 | 0.632830411 | 0.742145595 |
| cg13069815 | PAWR          | 12 | 0.018655282 | 0.395351045 | 0.538720926 |
| cg05923681 | PBRM1;PBRM:   | 3  | 0.012878502 | 0.546446281 | 0.664092852 |
| cg06022884 | PCCB          | 3  | 0.025715583 | 0.499920364 | 0.607125741 |
| cg00160440 | PCDH10        | 4  | 0.000586686 | 0.246341763 | 0.453783327 |
| cg18869485 | PCDHGA4;PCD   | 5  | 0.022027448 | 0.508781849 | 0.625404311 |
| cg14110086 | PCTP;PCTP     | 17 | 0.006338488 | 0.165545654 | 0.265749164 |
| cg19316405 | PDDC1         | 11 | 0.049306185 | 0.257912574 | 0.37550012  |
| cg06492024 | PDE1A;PDE1A   | 2  | 0.011941083 | 0.637401713 | 0.744091221 |
| cg25660428 | PDE4C;PDE4C   | 19 | 0.00248841  | 0.629571953 | 0.74131746  |
| cg23987137 | PDE4D;PDE4D;  | 5  | 0.000581377 | 0.321338516 | 0.48902059  |
| cg25317315 | PDE4DIP;PDE4  | 1  | 0.018766664 | 0.273297417 | 0.379611729 |
| cg24674437 | PDE6B;PDE6B;  | 4  | 0.039213786 | 0.423347441 | 0.538624117 |
| cg07576186 | PDHB          | 3  | 0.005632837 | 0.339148434 | 0.523437094 |
| cg10093934 | PDK1          | 2  | 0.013931325 | 0.344728563 | 0.49166221  |
| cg20714347 | PDLIM1        | 10 | 0.021005211 | 0.317145997 | 0.439996218 |
| cg01244128 | PDPK1;LOC652  | 16 | 0.017762899 | 0.388561053 | 0.494602428 |
| cg00551589 | PDPK1;PDPK1   | 16 | 0.048260354 | 0.726480418 | 0.830168101 |
| cg16590190 | PDPN;PDPN     | 1  | 1.45E-05    | 0.260683785 | 0.394657966 |
| cg24720151 | PDS5A;PDS5A;  | 4  | 0.008509249 | 0.419906311 | 0.529874319 |
| cg16724811 | PDXDC1        | 16 | 0.00010986  | 0.617594371 | 0.738187991 |
| cg11565786 | PDZD2         | 5  | 0.008504995 | 0.635813157 | 0.745432272 |
| cg13019092 | PDZK1         | 1  | 0.005940671 | 0.277543798 | 0.418233238 |
| cg13050115 | PDZRN3        | 3  | 0.031484549 | 0.415619314 | 0.571842727 |
| cg25688523 | PDZRN3        | 3  | 0.007331002 | 0.307547948 | 0.44254502  |
| cg27202075 | PDZRN3        | 3  | 0.001022547 | 0.60994696  | 0.731022945 |
| cg13521002 | PEBP4         | 8  | 0.006548911 | 0.378228194 | 0.518996824 |
| cg09327610 | PER3          | 1  | 0.014720275 | 0.29600778  | 0.469898681 |

|            |                 |    |             |             |             |
|------------|-----------------|----|-------------|-------------|-------------|
| cg25821223 | PERP            | 6  | 0.000726527 | 0.358847235 | 0.536827484 |
| cg08289056 | PFKFB3          | 10 | 4.27E-05    | 0.438207139 | 0.634476816 |
| cg03261682 | PFKFB3          | 10 | 0.015758067 | 0.390776173 | 0.509444677 |
| cg07102808 | PFKFB3;PFKFB3   | 10 | 0.008408703 | 0.231819041 | 0.359455556 |
| cg19084628 | PFKFB3;PFKFB3   | 10 | 0.038416235 | 0.297783075 | 0.413318935 |
| cg13782176 | PFKFB3;PFKFB3   | 10 | 0.036761844 | 0.480204929 | 0.580900008 |
| cg08568670 | PFKFB4          | 3  | 0.010081254 | 0.398642477 | 0.55885131  |
| cg04026948 | PGCP            | 8  | 0.02188311  | 0.183704619 | 0.330061872 |
| cg04839673 | PGM1            | 1  | 0.00143112  | 0.411091172 | 0.584195596 |
| cg03891302 | PHACTR1         | 6  | 0.017036871 | 0.580042667 | 0.704953888 |
| cg01192112 | PHACTR2;PHACTR1 | 6  | 0.008473969 | 0.263429687 | 0.401493499 |
| cg16220788 | PHF21A;PHF21A   | 11 | 0.022750531 | 0.191042409 | 0.330956322 |
| cg13471712 | PHF21A;PHF21A   | 11 | 0.00041814  | 0.445232855 | 0.55250416  |
| cg20131219 | PHLDB2;PHLDB2   | 3  | 0.026569784 | 0.308223355 | 0.456396098 |
| cg21857668 | PHLDB2;PLCX1    | 3  | 0.001990794 | 0.605115167 | 0.711909644 |
| cg00416882 | PIAS2;PIAS2     | 18 | 0.007824392 | 0.343846536 | 0.477872204 |
| cg16508714 | PIK3AP1         | 10 | 0.003115838 | 0.39539319  | 0.514448756 |
| cg03771739 | PIP4K2A         | 10 | 1.19E-06    | 0.319660189 | 0.612229127 |
| cg11327029 | PIP4K2A         | 10 | 0.003356076 | 0.324195195 | 0.560447291 |
| cg19397801 | PIP4K2A         | 10 | 0.004979705 | 0.312127357 | 0.536634509 |
| cg19423978 | PIP5K1C         | 19 | 0.002558931 | 0.30215355  | 0.42338575  |
| cg12148647 | PIP5K1C         | 19 | 0.001252221 | 0.16587788  | 0.278003261 |
| cg15756507 | PITPNC1;PITPNC1 | 17 | 0.000145802 | 0.455022375 | 0.576692421 |
| cg07284476 | PITPNC1;PITPNC1 | 17 | 0.015731543 | 0.637444822 | 0.742753303 |
| cg24967811 | PITPNM2         | 12 | 0.002749537 | 0.324568636 | 0.45925491  |
| cg15466933 | PITPNM2         | 12 | 0.007347152 | 0.530508255 | 0.648306655 |
| cg05399718 | PITPNM2         | 12 | 0.022320841 | 0.230312917 | 0.341187247 |
| cg13037550 | PITPNM2         | 12 | 0.033668449 | 0.560872622 | 0.666951751 |
| cg13168187 | PKP4;PKP4       | 2  | 0.002714744 | 0.322004343 | 0.51530747  |
| cg20438915 | PKP4;PKP4       | 2  | 0.000172829 | 0.690029287 | 0.792066003 |
| cg11131599 | PLEKHA6         | 1  | 9.47E-05    | 0.413062938 | 0.60424367  |
| cg25407979 | PLEKHA6         | 1  | 0.004258657 | 0.520625636 | 0.662677105 |
| cg08445687 | PLEKHF1         | 19 | 0.00901897  | 0.158609142 | 0.275179345 |
| cg16274899 | PLEKHG3         | 14 | 0.000424028 | 0.212551675 | 0.312637803 |
| cg11546777 | PLXDC2          | 10 | 0.003316883 | 0.330958324 | 0.506977293 |
| cg03631457 | PLXDC2          | 10 | 0.005849846 | 0.441451781 | 0.577361413 |
| cg20130744 | PLXDC2          | 10 | 0.02274478  | 0.343140805 | 0.46098483  |
| cg14899131 | PLXDC2          | 10 | 0.001198472 | 0.586181428 | 0.704010075 |
| cg02536263 | PLXDC2          | 10 | 0.007733218 | 0.673027654 | 0.788088138 |
| cg24161018 | PLXNA4          | 7  | 0.002587583 | 0.414553119 | 0.584349364 |
| cg09837648 | PLXNB1;PLXNE1   | 3  | 0.00028008  | 0.254992981 | 0.442641046 |
| cg11602148 | PLXNB1;PLXNE1   | 3  | 0.028361861 | 0.471519707 | 0.608024314 |
| cg27206976 | PLXNB2          | 22 | 0.011331436 | 0.270511199 | 0.380740535 |
| cg23347790 | PLXNC1          | 12 | 5.66E-05    | 0.639325683 | 0.750637471 |
| cg07078269 | PLXND1          | 3  | 0.002706966 | 0.364336608 | 0.54132934  |
| cg15629311 | PLXND1          | 3  | 2.60E-05    | 0.231417513 | 0.379123267 |

|            |               |    |             |             |             |
|------------|---------------|----|-------------|-------------|-------------|
| cg27353085 | PLXND1        | 3  | 0.026076455 | 0.270530785 | 0.413700397 |
| cg07908223 | PMEPA1;PMEF   | 20 | 0.013460264 | 0.320150251 | 0.467093149 |
| cg23148094 | PNLIPRP1      | 10 | 0.016030855 | 0.432523349 | 0.547685255 |
| cg27178772 | PNRC1         | 6  | 0.024972741 | 0.340198019 | 0.448309008 |
| cg14682080 | POLS          | 5  | 0.002008862 | 0.608656299 | 0.737719903 |
| cg18241308 | PON3          | 7  | 0.004909496 | 0.576443821 | 0.682961182 |
| cg21286173 | PPAPDC1B      | 8  | 0.047361191 | 0.217933885 | 0.35281571  |
| cg20484417 | PPFIA2        | 12 | 0.026607516 | 0.447533326 | 0.558165236 |
| cg10952234 | PPFIA4;PPFIA4 | 1  | 0.001469397 | 0.358398732 | 0.478008051 |
| cg24000087 | PPFIA4;PPFIA4 | 1  | 0.008619508 | 0.30556332  | 0.419946202 |
| cg21058511 | PPM1H         | 12 | 0.029337085 | 0.439756558 | 0.562435785 |
| cg06740440 | PPM1J         | 1  | 7.80E-06    | 0.590459011 | 0.815352148 |
| cg24520381 | PPP1R1B;PPP1  | 17 | 0.027816583 | 0.39170584  | 0.506169079 |
| cg25409308 | PPP2R1B       | 11 | 0.00934056  | 0.475434375 | 0.588738982 |
| cg02265810 | PPP2R2D;PPP2  | 10 | 0.045008242 | 0.453160975 | 0.594097053 |
| cg12417775 | PPP2R5A       | 1  | 3.09E-06    | 0.289394907 | 0.482676526 |
| cg09112613 | PRAM1         | 19 | 0.017655149 | 0.63608864  | 0.739201277 |
| cg22731637 | PRDM11        | 11 | 4.81E-06    | 0.140898826 | 0.249804771 |
| cg06911744 | PRDM16;PRDM   | 1  | 0.00708809  | 0.275170452 | 0.432207154 |
| cg26425711 | PRDM16;PRDM   | 1  | 0.002033837 | 0.288334277 | 0.422816982 |
| cg11138362 | PRDM16;PRDM   | 1  | 4.49E-05    | 0.139879799 | 0.267577097 |
| cg11392550 | PRDM16;PRDM   | 1  | 0.039386231 | 0.224213443 | 0.346942031 |
| cg17601209 | PRDM16;PRDM   | 1  | 0.030708578 | 0.308707714 | 0.428816072 |
| cg22497969 | PRDM16;PRDM   | 1  | 0.032957179 | 0.133190072 | 0.245383224 |
| cg23025459 | PRDM16;PRDM   | 1  | 0.000480997 | 0.362722316 | 0.469264513 |
| cg22720392 | PRDM16;PRDM   | 1  | 0.027840903 | 0.19773912  | 0.303224806 |
| cg19644991 | PRDM6         | 5  | 0.007493589 | 0.434906447 | 0.595484036 |
| cg03311556 | PRDM8         | 4  | 0.000612653 | 0.287350346 | 0.497643271 |
| cg04858148 | PRDM8         | 4  | 0.001071656 | 0.345318403 | 0.52653165  |
| cg06440348 | PRDM8         | 4  | 0.027386211 | 0.324678798 | 0.433122427 |
| cg09595050 | PRDM8         | 4  | 0.002466292 | 0.338655923 | 0.439980481 |
| cg02732915 | PRDM8;PRDM    | 4  | 0.020600841 | 0.434701702 | 0.603915208 |
| cg02941135 | PRDM8;PRDM    | 4  | 0.009983483 | 0.504205464 | 0.664035162 |
| cg05522011 | PRDM8;PRDM    | 4  | 0.00157639  | 0.34689371  | 0.499967473 |
| cg05452645 | PRDM8;PRDM    | 4  | 0.000158433 | 0.220573231 | 0.370321893 |
| cg00138041 | PRDM8;PRDM    | 4  | 0.00044896  | 0.210567372 | 0.347187034 |
| cg11388320 | PRDM8;PRDM    | 4  | 0.00033796  | 0.220166546 | 0.334972165 |
| cg27242132 | PRDM8;PRDM    | 4  | 3.02E-05    | 0.147425205 | 0.255553893 |
| cg26403580 | PRDX3;PRDX3   | 10 | 0.009437351 | 0.190648774 | 0.318273089 |
| cg06068369 | PREP          | 6  | 0.012458969 | 0.720732173 | 0.82479602  |
| cg26206598 | PREX1         | 20 | 0.001005528 | 0.355643813 | 0.458331948 |
| cg11409510 | PRICKLE1      | 12 | 0.043302227 | 0.590221325 | 0.693158578 |
| cg20525037 | PRICKLE2      | 3  | 0.019751035 | 0.558842332 | 0.672354257 |
| cg26284782 | PRKAG2;PRKA   | 7  | 0.001361284 | 0.179063015 | 0.326159793 |
| cg26482626 | PRKAG2;PRKA   | 7  | 0.00159655  | 0.376131739 | 0.511167237 |
| cg22719878 | PRKAG2;PRKA   | 7  | 0.004463839 | 0.394585096 | 0.522492493 |

|            |                |    |             |             |             |
|------------|----------------|----|-------------|-------------|-------------|
| cg16581738 | PRKAR1B;PRK/   | 7  | 0.002173925 | 0.437420447 | 0.628730558 |
| cg11315991 | PRKAR1B;PRK/   | 7  | 0.041546874 | 0.379006287 | 0.513882016 |
| cg10127554 | PRKAR1B;PRK/   | 7  | 0.000735199 | 0.456420335 | 0.586886874 |
| cg16808922 | PRKCA          | 17 | 0.002876115 | 0.600562955 | 0.73966764  |
| cg09655520 | PRKCA          | 17 | 0.025652062 | 0.464822404 | 0.603390049 |
| cg10460643 | PRKCD;PRKCD    | 3  | 0.000439528 | 0.349284638 | 0.488037568 |
| cg02840585 | PRKCZ;PRKCZ;I  | 1  | 0.000649711 | 0.40029748  | 0.58995373  |
| cg25727019 | PRKCZ;PRKCZ;I  | 1  | 0.00621812  | 0.340921186 | 0.47102758  |
| cg17156349 | PRKCZ;PRKCZ;I  | 1  | 0.029753134 | 0.264712971 | 0.392501351 |
| cg22128985 | PRKCZ;PRKCZ;I  | 1  | 0.029881076 | 0.341957082 | 0.457994685 |
| cg15121267 | PRL;PRL        | 6  | 0.011900454 | 0.320182342 | 0.437176918 |
| cg09196146 | PRO1768;FOXI   | 14 | 0.040250844 | 0.31997851  | 0.434199821 |
| cg18014186 | PRR16          | 5  | 3.09E-06    | 0.611737787 | 0.714951981 |
| cg13942826 | PRR4;PRR4      | 12 | 0.004704828 | 0.648206184 | 0.762141899 |
| cg00702561 | PRRX2          | 9  | 0.001470507 | 0.197903271 | 0.364694767 |
| cg03251852 | PRX;PRX        | 19 | 0.00040458  | 0.619062175 | 0.743146664 |
| cg01560422 | PSIP1;PSIP1;PS | 9  | 0.027384561 | 0.471452618 | 0.577097345 |
| cg26227523 | PSTPIP1        | 15 | 0.000262392 | 0.449119399 | 0.5754143   |
| cg01025800 | PTBP1;PTBP1;I  | 19 | 0.00305866  | 0.485913125 | 0.620079832 |
| cg13563132 | PTCH1;PTCH1;   | 9  | 0.003628888 | 0.623578814 | 0.732771642 |
| cg15684702 | PTCH2;PTCH2    | 1  | 0.003100403 | 0.377913512 | 0.485231666 |
| cg09267188 | PTDSS1         | 8  | 0.0093943   | 0.331275668 | 0.452429371 |
| cg14914552 | PTDSS1         | 8  | 0.017209964 | 0.503744637 | 0.620677516 |
| cg10575846 | PTDSS2         | 11 | 0.044797926 | 0.448269444 | 0.557003536 |
| cg13712952 | PTENP1         | 9  | 0.045562316 | 0.476467794 | 0.59290123  |
| cg02335533 | PTHLH;PTHLH;   | 12 | 3.02E-05    | 0.153144253 | 0.282651187 |
| cg23913941 | PTK2;PTK2      | 8  | 9.23E-05    | 0.625662555 | 0.745194436 |
| cg17146731 | PTPN13;PTPN1   | 4  | 0.033461147 | 0.336652401 | 0.464779503 |
| cg04956511 | PTPN6          | 12 | 7.72E-05    | 0.093987234 | 0.213988184 |
| cg11073811 | PTPRF;PTPRF    | 1  | 0.000522497 | 0.092030487 | 0.193459858 |
| cg18022607 | PTPRG          | 3  | 0.014191102 | 0.593482531 | 0.696221498 |
| cg07143125 | PTPRJ;PTPRJ    | 11 | 0.0256797   | 0.605407237 | 0.725711539 |
| cg20847701 | PVT1           | 8  | 0.033289933 | 0.116337854 | 0.22680184  |
| cg26691059 | PXMP2          | 12 | 0.014494974 | 0.325670651 | 0.446329696 |
| cg25963540 | RAB11B         | 19 | 0.045978792 | 0.63021541  | 0.737884015 |
| cg09408143 | RAB11FIP3;RA   | 16 | 0.015086074 | 0.324227049 | 0.436302507 |
| cg17833066 | RAB11FIP4      | 17 | 0.013217527 | 0.190555527 | 0.319375865 |
| cg05000339 | RAB11FIP4      | 17 | 0.00566021  | 0.235034343 | 0.351963991 |
| cg25709050 | RAB11FIP4      | 17 | 0.006910414 | 0.224863884 | 0.33948822  |
| cg24174232 | RAB11FIP4      | 17 | 0.005138467 | 0.155361593 | 0.262037299 |
| cg02005758 | RAB7A          | 3  | 0.004113178 | 0.527210205 | 0.630827032 |
| cg18825221 | RAD51L1;RAD!   | 14 | 0.020307383 | 0.33873687  | 0.467543716 |
| cg22283115 | RADIL          | 7  | 0.020531302 | 0.541327698 | 0.649827684 |
| cg19447962 | RAI1           | 17 | 0.000320986 | 0.18861306  | 0.386669687 |
| cg03791861 | RAI1           | 17 | 0.001966561 | 0.444577004 | 0.581074717 |
| cg19147912 | RAI1           | 17 | 0.029275249 | 0.292975186 | 0.39948818  |

|            |               |    |             |             |             |
|------------|---------------|----|-------------|-------------|-------------|
| cg07505049 | RAI14;RAI14;R | 5  | 0.00208543  | 0.555141298 | 0.679285879 |
| cg13993179 | RALBP1        | 18 | 0.01579313  | 0.435115322 | 0.542295454 |
| cg01363736 | RALGAPB       | 20 | 0.013038447 | 0.555902041 | 0.701287946 |
| cg14819160 | RAMP1         | 2  | 0.003105072 | 0.188198962 | 0.3196865   |
| cg02909097 | RAP1GAP2;RAI  | 17 | 0.003899168 | 0.20665221  | 0.330340354 |
| cg07211684 | RAPGEF2       | 4  | 0.009723018 | 0.543678868 | 0.646589071 |
| cg26878655 | RARA;RARA;R/  | 17 | 0.000958508 | 0.485059938 | 0.618970923 |
| cg08977270 | RARRES1;RARF  | 3  | 0.000124995 | 0.449229299 | 0.58871273  |
| cg00502575 | RASA3         | 13 | 0.004603086 | 0.345909642 | 0.510883687 |
| cg07869232 | RASA3         | 13 | 6.81E-05    | 0.31146295  | 0.430345899 |
| cg22730327 | RASAL2;RASAL  | 1  | 0.00518832  | 0.458057714 | 0.577609905 |
| cg06464781 | RASGRP2;RASG  | 11 | 0.02565087  | 0.38336885  | 0.493199746 |
| cg16025118 | RBM19;RBM19   | 12 | 0.003483604 | 0.57389492  | 0.701163938 |
| cg22992279 | RBPJ;RBPJ;RBP | 4  | 0.000285404 | 0.30937668  | 0.487338599 |
| cg10143543 | RCHY1;RCHY1;  | 4  | 5.87E-05    | 0.570072151 | 0.72001748  |
| cg10823566 | RCSD1         | 1  | 0.013153771 | 0.207963864 | 0.333905406 |
| cg01782826 | RCSD1         | 1  | 0.003115838 | 0.339202388 | 0.460989802 |
| cg09354263 | RECQL5;LOC64  | 17 | 0.015834539 | 0.258504736 | 0.374196877 |
| cg11937768 | REEP3         | 10 | 0.01624919  | 0.249631274 | 0.426527458 |
| cg25722041 | RERE;RERE     | 1  | 0.002975878 | 0.364203048 | 0.488489614 |
| cg18645642 | RERE;RERE     | 1  | 0.019574443 | 0.261610715 | 0.373326147 |
| cg02780029 | RET;RET       | 10 | 0.020737701 | 0.375893127 | 0.482616408 |
| cg23527387 | REV1;REV1     | 2  | 0.014791679 | 0.177557451 | 0.293908559 |
| cg04212651 | RFPL4B        | 6  | 0.008656416 | 0.462520924 | 0.633801337 |
| cg15952465 | RFPL4B        | 6  | 0.018953285 | 0.521277715 | 0.634231054 |
| cg12728543 | RFWD2;RFWD2   | 1  | 0.029494    | 0.597288638 | 0.718274314 |
| cg07205154 | RFWD2;RFWD2   | 1  | 0.031310688 | 0.529037757 | 0.63199654  |
| cg26905931 | RGMA;RGMA;I   | 15 | 0.003960981 | 0.185308996 | 0.341632325 |
| cg03462901 | RGMA;RGMA;I   | 15 | 0.003528583 | 0.264704687 | 0.410917689 |
| cg03971808 | RGS12;RGS12   | 4  | 0.000619904 | 0.614765457 | 0.726927253 |
| cg01008894 | RGS12;RGS12   | 4  | 0.000322494 | 0.489719919 | 0.592822944 |
| cg08403043 | RGS12;RGS12;  | 4  | 0.02234362  | 0.32274838  | 0.43287317  |
| cg16324409 | RGS12;RGS12;  | 4  | 0.001866714 | 0.123801517 | 0.225285001 |
| cg24928726 | RGS8;RGS8     | 1  | 0.016220597 | 0.180873431 | 0.292541642 |
| cg07405083 | RHBDF1        | 16 | 0.008375787 | 0.186560649 | 0.303337461 |
| cg26737223 | RHBDF2;RHBD   | 17 | 0.024392358 | 0.663819205 | 0.799708115 |
| cg11164618 | RHBDF2;RHBD   | 17 | 0.0024936   | 0.373481295 | 0.490013086 |
| cg11863380 | RHOBTB3       | 5  | 0.00155473  | 0.470829779 | 0.628117381 |
| cg00219210 | RICH2         | 17 | 0.04877379  | 0.33559662  | 0.473401781 |
| cg06466839 | RICS          | 11 | 0.007761837 | 0.508169153 | 0.615626617 |
| cg23825057 | RILPL1        | 12 | 4.15E-05    | 0.477523395 | 0.610442045 |
| cg22107662 | RIMBP3        | 22 | 0.009214894 | 0.268651064 | 0.393558677 |
| cg01288337 | RIN3          | 14 | 0.00012746  | 0.174512246 | 0.326006012 |
| cg26282025 | RING1         | 6  | 0.001074222 | 0.475613836 | 0.629930239 |
| cg00085061 | RIPK4         | 21 | 0.011278547 | 0.516548997 | 0.641314688 |
| cg20989926 | RLBP1         | 15 | 0.018068354 | 0.352745699 | 0.463608999 |



|            |                 |    |             |             |             |
|------------|-----------------|----|-------------|-------------|-------------|
| cg10173075 | RLBP1;RLBP1     | 15 | 0.012674802 | 0.347326291 | 0.463601599 |
| cg16989837 | RLF             | 1  | 0.013851157 | 0.607575807 | 0.722374286 |
| cg06073041 | RNF14           | 5  | 0.016928397 | 0.556291288 | 0.684734254 |
| cg04182865 | RNF14           | 5  | 0.018251647 | 0.404412931 | 0.512058087 |
| cg13464573 | RNF144A         | 2  | 0.000921354 | 0.263960016 | 0.39607154  |
| cg22163472 | RNF19B;RNF19B   | 1  | 0.005958829 | 0.567667631 | 0.683540387 |
| cg20433382 | RNF217          | 6  | 0.004940263 | 0.651050762 | 0.779132909 |
| cg18196453 | RNF217          | 6  | 0.004622814 | 0.267361932 | 0.385749152 |
| cg12152193 | RNF44           | 5  | 0.00018242  | 0.340804166 | 0.451277335 |
| cg03163812 | RNF5P1          | 8  | 0.002707807 | 0.209295342 | 0.423374525 |
| cg19311055 | RNF5P1          | 8  | 0.012182763 | 0.369063005 | 0.542347848 |
| cg24933651 | ROBO2;ROBO2     | 3  | 0.004276769 | 0.702328385 | 0.821317945 |
| cg14216252 | ROR1;ROR1       | 1  | 0.015921784 | 0.28591056  | 0.405292143 |
| cg14044388 | ROR2            | 9  | 0.012277327 | 0.345424824 | 0.446212779 |
| cg16964728 | RORA            | 15 | 9.28E-06    | 0.664561634 | 0.777525668 |
| cg08106764 | RORA            | 15 | 0.041142705 | 0.342978329 | 0.446832888 |
| cg09021817 | RPA1            | 17 | 0.031683364 | 0.691374767 | 0.795791118 |
| cg21040096 | RPH3AL          | 17 | 0.037506803 | 0.401379133 | 0.537609288 |
| cg01886663 | RPTOR;RPTOR     | 17 | 0.000409178 | 0.34100022  | 0.470028079 |
| cg00549398 | RPTOR;RPTOR     | 17 | 0.004057358 | 0.61036074  | 0.71574183  |
| cg12434898 | RPTOR;RPTOR     | 17 | 0.035313417 | 0.26795581  | 0.372361466 |
| cg01358966 | RRN3P2          | 16 | 0.018947494 | 0.415236428 | 0.539521347 |
| cg17142404 | RTN4RL1         | 17 | 0.005030914 | 0.581008058 | 0.697205792 |
| cg04194479 | RUNDC2C         | 16 | 0.006993475 | 0.308686111 | 0.474548096 |
| cg14545975 | RXRA            | 9  | 1.50E-05    | 0.321599635 | 0.539136372 |
| cg02319187 | RXRA            | 9  | 0.005107042 | 0.415431435 | 0.591199249 |
| cg13425135 | RXRA            | 9  | 0.001702436 | 0.379105102 | 0.499601891 |
| cg10805254 | RYBP            | 3  | 0.013912186 | 0.556398192 | 0.667210067 |
| cg08092515 | RYK;RYK         | 3  | 0.047030345 | 0.552556531 | 0.652990107 |
| cg00299070 | RYR2            | 1  | 0.045325687 | 0.160672657 | 0.273673795 |
| cg17080740 | S100A1;S100A1   | 1  | 0.006908021 | 0.200450721 | 0.306551305 |
| cg14467840 | S100A13;S100A13 | 1  | 0.009274856 | 0.132534004 | 0.251244816 |
| cg10963218 | S100A13;S100A13 | 1  | 0.005706792 | 0.187760465 | 0.345452196 |
| cg15559456 | S100A13;S100A13 | 1  | 0.017045296 | 0.132457878 | 0.237621173 |
| cg09171874 | S100A3          | 1  | 0.003131992 | 0.540538887 | 0.668475734 |
| cg07685786 | S100B           | 21 | 0.000223703 | 0.492976547 | 0.61059706  |
| cg18384226 | S1PR2           | 19 | 0.000696503 | 0.577668847 | 0.690569787 |
| cg21042285 | SACS            | 13 | 0.000195799 | 0.600175711 | 0.717053222 |
| cg01030747 | SAMD4A;SAMD4A   | 14 | 0.029497732 | 0.451858158 | 0.562158122 |
| cg18693051 | SBNO2           | 19 | 0.016784624 | 0.154586735 | 0.263626312 |
| cg01663970 | SCARB1;SCARB1   | 12 | 0.006201051 | 0.756593155 | 0.872658809 |
| cg22091609 | SCARF2;SCARF2   | 22 | 4.09E-05    | 0.164181768 | 0.303138426 |
| cg06059069 | SCG5;SCG5       | 15 | 0.008164371 | 0.531574415 | 0.650818296 |
| cg20341535 | SCN4B;SCN4B     | 11 | 0.000960263 | 0.483710338 | 0.592415179 |
| cg19752565 | SCN7A           | 2  | 0.001742536 | 0.233865574 | 0.348754873 |
| cg23245485 | SCNN1A;SCNN1A   | 12 | 0.000380535 | 0.351780281 | 0.477681973 |

|            |               |    |             |             |             |
|------------|---------------|----|-------------|-------------|-------------|
| cg04858110 | SCRN1;SCRN1;  | 7  | 0.000119848 | 0.503507062 | 0.645265055 |
| cg24733126 | SCUBE2;SCUBE  | 11 | 0.043238875 | 0.434323573 | 0.549942699 |
| cg23356017 | SDC2          | 8  | 0.000720542 | 0.243176564 | 0.417853312 |
| cg12190613 | SDC2          | 8  | 0.048224152 | 0.298167025 | 0.415245075 |
| cg05374982 | SDC3          | 1  | 4.55E-06    | 0.247091504 | 0.377532819 |
| cg14836522 | SDC3          | 1  | 0.001074053 | 0.140238298 | 0.26950232  |
| cg24655777 | SDHAP3        | 5  | 0.002489672 | 0.46471949  | 0.570966336 |
| cg04609841 | SDK1          | 7  | 0.04208757  | 0.218673316 | 0.346552168 |
| cg02491557 | SDK1          | 7  | 0.044168789 | 0.20357939  | 0.30877209  |
| cg22677475 | SDK1;SDK1     | 7  | 0.012974048 | 0.61874337  | 0.721232851 |
| cg00711291 | SDK2          | 17 | 0.008828468 | 0.144825039 | 0.310127024 |
| cg24527434 | SDK2          | 17 | 0.001707833 | 0.266118827 | 0.389657752 |
| cg13699963 | SDK2          | 17 | 0.003944778 | 0.161430581 | 0.275977252 |
| cg18405260 | SEC1;NTN5     | 19 | 0.001448184 | 0.657067891 | 0.765200271 |
| cg15046304 | SEC14L1;SEC14 | 17 | 0.036632746 | 0.210502565 | 0.339673011 |
| cg09943050 | SEMA3A        | 7  | 0.024734612 | 0.275071467 | 0.396002203 |
| cg21578050 | SEMA6A        | 5  | 0.009956236 | 0.678750894 | 0.792052368 |
| cg27157619 | SEMA7A;SEMA   | 15 | 0.009379944 | 0.233404896 | 0.38533826  |
| cg03760308 | SENP6;SENP6   | 6  | 0.012383621 | 0.415338955 | 0.521722937 |
| cg17168428 | SEPT7;SEPT7   | 7  | 0.001673078 | 0.618780911 | 0.72036906  |
| cg03432618 | SEPT9         | 22 | 0.002783328 | 0.299619503 | 0.432654654 |
| cg07827420 | SEPT9;SEPT9;S | 17 | 0.001152671 | 0.298476434 | 0.426299289 |
| cg17112975 | SEPT9;SEPT9;S | 17 | 0.000402097 | 0.158162164 | 0.276249657 |
| cg00871371 | SEPT9;SEPT9;S | 17 | 0.006113277 | 0.407830296 | 0.525848121 |
| cg12858577 | SEPT9;SEPT9;S | 17 | 0.005706449 | 0.472872977 | 0.586443788 |
| cg26079706 | SEPT9;SEPT9;S | 17 | 0.0210806   | 0.466825441 | 0.578537795 |
| cg12194864 | SEPT9;SEPT9;S | 17 | 0.013386935 | 0.634663884 | 0.740334084 |
| cg12673019 | SERGEF        | 11 | 0.046188874 | 0.30147059  | 0.436419379 |
| cg01417313 | SERTAD4       | 1  | 0.030015941 | 0.188030518 | 0.319912107 |
| cg17117243 | SESN1         | 6  | 1.12E-05    | 0.316523238 | 0.559210922 |
| cg04839897 | SESN2         | 1  | 0.008260193 | 0.574371955 | 0.675730297 |
| cg02154585 | SFRP1         | 8  | 0.01099185  | 0.446909558 | 0.568001331 |
| cg14787704 | SFRS12;SFRS12 | 5  | 0.003274592 | 0.541836733 | 0.65740713  |
| cg13036702 | SFRS2B        | 11 | 0.000118996 | 0.588520322 | 0.719916703 |
| cg12181028 | SFRS8         | 12 | 0.00067329  | 0.318126565 | 0.421326666 |
| cg13049997 | SFT2D1        | 6  | 0.022800301 | 0.442564718 | 0.558041917 |
| cg16627285 | SGCA;SGCA     | 17 | 0.010465204 | 0.472868255 | 0.609470821 |
| cg23158475 | SGK3          | 8  | 0.000867845 | 0.623442995 | 0.748281943 |
| cg10362613 | SH2D4A        | 8  | 0.011919432 | 0.252073262 | 0.372516996 |
| cg09042791 | SH3BP4        | 2  | 0.011872615 | 0.259490316 | 0.436274211 |
| cg12559925 | SH3BP4        | 2  | 0.008921451 | 0.228355049 | 0.369719513 |
| cg01854776 | SH3BP4        | 2  | 0.035006754 | 0.195227934 | 0.298231905 |
| cg21283680 | SH3BP5        | 3  | 3.82E-05    | 0.255766529 | 0.434500958 |
| cg02030270 | SH3GL3;SH3GL  | 15 | 0.016642875 | 0.382265915 | 0.525001632 |
| cg12094736 | SH3PXD2A      | 10 | 0.016250065 | 0.350545222 | 0.45217233  |
| cg25693317 | SH3PXD2B      | 5  | 3.31E-06    | 0.149865895 | 0.456547059 |

|            |               |    |             |             |             |
|------------|---------------|----|-------------|-------------|-------------|
| cg02772159 | SH3PXD2B      | 5  | 0.03382585  | 0.354769201 | 0.460591192 |
| cg01642901 | SH3RF1        | 4  | 0.011722546 | 0.508999183 | 0.64747139  |
| cg18949666 | SH3RF1        | 4  | 0.000167529 | 0.566430884 | 0.68658722  |
| cg11367404 | SH3RF1        | 4  | 0.004462322 | 0.655671814 | 0.757966312 |
| cg19024599 | SH3RF3        | 2  | 0.008621085 | 0.341748749 | 0.512767001 |
| cg22092606 | SH3RF3        | 2  | 0.000504234 | 0.654651837 | 0.762917233 |
| cg20706049 | SH3RF3        | 2  | 0.005548102 | 0.550927552 | 0.657980333 |
| cg07248017 | SH3TC1        | 4  | 0.001159697 | 0.373422656 | 0.500181223 |
| cg21437028 | SHOX2;SHOX2   | 3  | 0.000621792 | 0.375357685 | 0.534988599 |
| cg15726154 | SHOX2;SHOX2   | 3  | 0.012404945 | 0.431142517 | 0.570288235 |
| cg21847036 | SHOX2;SHOX2   | 3  | 0.002373878 | 0.309541373 | 0.429558515 |
| cg13824815 | SIAE          | 11 | 0.036499984 | 0.41894577  | 0.567847146 |
| cg11320438 | SIGLEC11;SIGL | 19 | 0.017385038 | 0.523789131 | 0.624685544 |
| cg23286646 | SIM2          | 21 | 0.027740367 | 0.184725384 | 0.303731105 |
| cg27025738 | SIPA1L1       | 14 | 0.003459835 | 0.4290375   | 0.530162312 |
| cg02360367 | SKI           | 1  | 0.003347781 | 0.312450357 | 0.497076    |
| cg24377150 | SKI           | 1  | 0.041788864 | 0.409438572 | 0.529634458 |
| cg06151145 | SLAIN2        | 4  | 6.78E-05    | 0.316495196 | 0.423844136 |
| cg09790628 | SLC12A7       | 5  | 0.002325654 | 0.544273595 | 0.70252835  |
| cg07405771 | SLC12A8       | 3  | 0.000464683 | 0.345514021 | 0.449147785 |
| cg22231400 | SLC17A7       | 19 | 0.002532156 | 0.129709934 | 0.261606975 |
| cg07793724 | SLC1A7        | 1  | 0.001529011 | 0.521286424 | 0.626894882 |
| cg13643060 | SLC25A13;SLC  | 7  | 7.85E-05    | 0.528862738 | 0.712553672 |
| cg25561754 | SLC26A11;SLC  | 17 | 0.026703639 | 0.311582458 | 0.438366696 |
| cg06702884 | SLC29A3       | 10 | 0.003832076 | 0.295089682 | 0.413643626 |
| cg05345039 | SLC2A1        | 1  | 0.003667646 | 0.316047995 | 0.503757667 |
| cg20294984 | SLC2A1        | 1  | 0.000119795 | 0.537047658 | 0.716835486 |
| cg15089806 | SLC2A1        | 1  | 8.89E-05    | 0.233329785 | 0.355667448 |
| cg11381149 | SLC2A12       | 6  | 0.040278844 | 0.300291058 | 0.423271488 |
| cg14115249 | SLC2A6;SLC2A  | 9  | 0.012630755 | 0.691195092 | 0.791985691 |
| cg02339793 | SLC38A10;SLC  | 17 | 0.048746304 | 0.345414062 | 0.45194811  |
| cg21461745 | SLC39A11;SLC  | 17 | 0.014436997 | 0.390395176 | 0.557733952 |
| cg24136932 | SLC39A14      | 8  | 0.01973435  | 0.441652501 | 0.580877585 |
| cg27315497 | SLC43A1       | 11 | 0.00026325  | 0.150898065 | 0.291443979 |
| cg09329516 | SLC43A2       | 17 | 5.67E-06    | 0.543234695 | 0.663188904 |
| cg17207736 | SLC45A4       | 8  | 0.03233377  | 0.503244002 | 0.618130407 |
| cg10752421 | SLC7A1        | 13 | 0.00725486  | 0.450426136 | 0.584729597 |
| cg06690548 | SLC7A11       | 4  | 0.009929722 | 0.350188472 | 0.452506587 |
| cg04171052 | SLC7A5        | 16 | 0.035592865 | 0.287946379 | 0.393532668 |
| cg25073563 | SLC8A1;SLC8A  | 2  | 0.000406007 | 0.32574038  | 0.457084762 |
| cg01346158 | SLC9A3R2;SLC  | 16 | 0.023477619 | 0.609703934 | 0.744700982 |
| cg05906024 | SLIT3         | 5  | 0.011383397 | 0.353001411 | 0.525371683 |
| cg13008977 | SLIT3         | 5  | 0.003347781 | 0.331309202 | 0.489891608 |
| cg17229698 | SLIT3         | 5  | 0.013640075 | 0.331315509 | 0.489708559 |
| cg06236559 | SMAD2;SMAD    | 18 | 0.003256927 | 0.322591246 | 0.45529273  |
| cg25793587 | SMAD3         | 15 | 4.77E-05    | 0.686224593 | 0.806577648 |

|            |               |    |             |             |             |
|------------|---------------|----|-------------|-------------|-------------|
| cg00350432 | SMAD6;SMAD    | 15 | 0.011954801 | 0.352688068 | 0.454574394 |
| cg14636077 | SMCR5;RAI1    | 17 | 0.013122043 | 0.422601401 | 0.547646303 |
| cg22967008 | SMOC2;SMOC    | 6  | 0.000106049 | 0.472484986 | 0.653299118 |
| cg17802216 | SMOC2;SMOC    | 6  | 0.001391128 | 0.481841169 | 0.651763742 |
| cg24114708 | SMOC2;SMOC    | 6  | 0.017116592 | 0.347024156 | 0.485966196 |
| cg10041417 | SMOC2;SMOC    | 6  | 0.039794181 | 0.262895349 | 0.39007523  |
| cg07979566 | SMOC2;SMOC    | 6  | 0.004283081 | 0.545979002 | 0.670935273 |
| cg14806083 | SMOC2;SMOC    | 6  | 0.045258334 | 0.312180445 | 0.434569212 |
| cg13705956 | SMOC2;SMOC    | 6  | 0.006770837 | 0.420408795 | 0.540037873 |
| cg18121962 | SMYD3;SMYD3   | 1  | 0.025425569 | 0.289778832 | 0.413826767 |
| cg05073044 | SNAPC1        | 14 | 0.006588592 | 0.322411967 | 0.50027182  |
| cg11857142 | SND1          | 7  | 0.008579275 | 0.205563859 | 0.317304149 |
| cg22635676 | SNED1         | 2  | 0.001956387 | 0.136668951 | 0.29056462  |
| cg15361291 | SNED1         | 2  | 8.31E-05    | 0.268538622 | 0.406589014 |
| cg25241559 | SNED1         | 2  | 0.011794694 | 0.623489604 | 0.748180569 |
| cg15889424 | SNORA80;URB   | 21 | 0.00057353  | 0.33987481  | 0.490892089 |
| cg15075241 | SNORA80B;OD   | 2  | 1.09E-05    | 0.418969398 | 0.648571476 |
| cg06874326 | SNX31         | 8  | 0.004267364 | 0.591530181 | 0.707596214 |
| cg06583438 | SOBP          | 6  | 0.004700903 | 0.523502633 | 0.666318533 |
| cg17369406 | SON;SON       | 21 | 0.017351113 | 0.320651238 | 0.461949019 |
| cg16433265 | SORBS2        | 4  | 0.012452195 | 0.374727456 | 0.478153854 |
| cg18803251 | SORCS2        | 4  | 0.049592614 | 0.617086892 | 0.720035777 |
| cg06205574 | SOX5;SOX5     | 12 | 0.001610553 | 0.341147043 | 0.561441865 |
| cg20672284 | SOX5;SOX5     | 12 | 6.30E-05    | 0.58391682  | 0.714456239 |
| cg00861695 | SPATA13;MIR2  | 13 | 3.75E-05    | 0.583665198 | 0.744684576 |
| cg07152812 | SPATA13;MIR2  | 13 | 0.013718971 | 0.405006628 | 0.545073963 |
| cg25643223 | SPATA13;SPAT  | 13 | 0.00060514  | 0.634605789 | 0.743556882 |
| cg08855504 | SPATA18       | 4  | 0.027786974 | 0.597353609 | 0.705106139 |
| cg14106933 | SPATS2L;SPAT  | 2  | 0.018325283 | 0.336556373 | 0.44424093  |
| cg20174636 | SPEG          | 2  | 0.002455849 | 0.140481161 | 0.244110199 |
| cg05635923 | SPG20         | 13 | 0.026634847 | 0.265827938 | 0.449396722 |
| cg15754752 | SPG20         | 13 | 0.018469433 | 0.170328632 | 0.347671955 |
| cg14531665 | SPIN1         | 9  | 0.000326398 | 0.577893727 | 0.696037195 |
| cg00401471 | SPINT2;SPINT2 | 19 | 0.010761274 | 0.2394368   | 0.407260021 |
| cg20551922 | SPNS3         | 17 | 0.036900005 | 0.313559295 | 0.421637885 |
| cg04927066 | SPOCK1        | 5  | 2.93E-05    | 0.717784229 | 0.841854723 |
| cg02065148 | SPON2;SPON2   | 4  | 0.000201074 | 0.363972481 | 0.509455728 |
| cg13464059 | SPPL2B;SPPL2B | 19 | 0.001048635 | 0.632900504 | 0.753693861 |
| cg22854448 | SPRED2        | 2  | 3.99E-06    | 0.197189155 | 0.498720403 |
| cg08651590 | SPRED2;SPRED  | 2  | 0.001345964 | 0.173063999 | 0.36255928  |
| cg14406727 | SPRED2;SPRED  | 2  | 0.001103606 | 0.385514755 | 0.525592484 |
| cg26254045 | SPRED3        | 19 | 2.66E-06    | 0.371187203 | 0.501770386 |
| cg27549878 | SPRED3        | 19 | 0.000440605 | 0.188446968 | 0.313638638 |
| cg23632432 | SPSB1         | 1  | 0.007756493 | 0.315820592 | 0.443243563 |
| cg08158518 | SPSB4         | 3  | 0.005477447 | 0.58234759  | 0.69998114  |
| cg24528602 | SPTBN1;SPTBN  | 2  | 0.031837149 | 0.53004887  | 0.648794881 |

|            |                |    |             |             |             |
|------------|----------------|----|-------------|-------------|-------------|
| cg23709902 | SRCIN1         | 17 | 0.001680703 | 0.173307289 | 0.279628217 |
| cg11014073 | SRGAP1         | 12 | 0.017485302 | 0.277984716 | 0.447682724 |
| cg17354987 | SRGAP1         | 12 | 0.026971844 | 0.442852229 | 0.588509492 |
| cg24878115 | SSBP4;SSBP4    | 19 | 0.001042432 | 0.264551681 | 0.438453074 |
| cg26549529 | SSX2IP;SSX2IP; | 1  | 0.029615508 | 0.44106027  | 0.558365863 |
| cg11020894 | ST6GAL1;ST6G   | 3  | 0.028464819 | 0.202954016 | 0.343776944 |
| cg05720226 | ST7;ST7;ST7O1  | 7  | 0.01385968  | 0.404144267 | 0.506092821 |
| cg25490551 | ST8SIA1        | 12 | 0.005564673 | 0.588588984 | 0.695595807 |
| cg01146501 | STARD4         | 5  | 0.029509645 | 0.270103714 | 0.391283372 |
| cg12312086 | STARD9         | 15 | 0.00702893  | 0.329928431 | 0.480992198 |
| cg20173260 | STAT1;STAT1    | 2  | 0.0202551   | 0.220806862 | 0.397524876 |
| cg01004382 | STAT4          | 2  | 0.002163046 | 0.52569128  | 0.646421973 |
| cg19728382 | STC2           | 5  | 0.000145824 | 0.179955462 | 0.307867698 |
| cg03846076 | STC2           | 5  | 0.012331382 | 0.475289834 | 0.599125454 |
| cg07109745 | STIM1          | 11 | 0.007661628 | 0.211423291 | 0.360221775 |
| cg03534504 | STK10          | 5  | 0.000732319 | 0.281769386 | 0.507130973 |
| cg23423191 | STK10          | 5  | 0.004981686 | 0.476316477 | 0.609797739 |
| cg09110502 | STK24          | 13 | 0.000570745 | 0.42199222  | 0.620277753 |
| cg01442200 | STK24;STK24    | 13 | 0.0018195   | 0.502073163 | 0.649152842 |
| cg14582191 | STK32B         | 4  | 0.000310091 | 0.371035229 | 0.568125125 |
| cg24540362 | STK32B         | 4  | 0.000567227 | 0.570180962 | 0.681804395 |
| cg15246131 | STK32C         | 10 | 0.008633711 | 0.197314805 | 0.328624454 |
| cg04209885 | STK32C         | 10 | 0.027496661 | 0.272521879 | 0.390301274 |
| cg03766264 | STK38L         | 12 | 0.006143952 | 0.24290572  | 0.373442263 |
| cg23433370 | STK38L         | 12 | 0.047538591 | 0.285461206 | 0.399559582 |
| cg13345122 | STK39          | 2  | 0.015756377 | 0.234479112 | 0.388126521 |
| cg03351487 | STK39          | 2  | 0.007471687 | 0.195850675 | 0.327598927 |
| cg11775828 | STK39          | 2  | 0.003074477 | 0.198516993 | 0.314386089 |
| cg06631999 | STMN1          | 1  | 0.016614743 | 0.358607412 | 0.510089987 |
| cg00404923 | STOX2          | 4  | 0.00330519  | 0.392890556 | 0.496501729 |
| cg13668495 | STRBP;STRBP;S  | 9  | 0.015537484 | 0.460203199 | 0.58177319  |
| cg08493590 | SUPT3H         | 6  | 0.007116079 | 0.55099778  | 0.677087458 |
| cg07008600 | SUSD5          | 3  | 0.000356707 | 0.566753042 | 0.686254095 |
| cg13747145 | SUSD5          | 3  | 0.016109666 | 0.258028512 | 0.363170176 |
| cg03597463 | SUZ12          | 17 | 0.02910345  | 0.67918521  | 0.781444671 |
| cg18818498 | SVIL           | 10 | 0.020967585 | 0.587776018 | 0.69131929  |
| cg25426867 | SVIL;MIR938;S  | 10 | 0.025773481 | 0.159962378 | 0.262441917 |
| cg08010619 | SWAP70         | 11 | 0.004182972 | 0.203497157 | 0.351695467 |
| cg19987354 | SYNE2;SYNE2    | 14 | 0.021383482 | 0.236576973 | 0.394132577 |
| cg09572125 | SYNGAP1        | 6  | 0.001004472 | 0.391557669 | 0.512871238 |
| cg14533068 | SYNJ2          | 6  | 0.001115116 | 0.248479376 | 0.392123654 |
| cg01228193 | SYNPO          | 5  | 0.036659715 | 0.239016133 | 0.358178203 |
| cg06559925 | SYNPO;SYNPO    | 5  | 0.00970467  | 0.313430715 | 0.415886657 |
| cg13991728 | SYNPO;SYNPO    | 5  | 0.026198667 | 0.208887749 | 0.339992127 |
| cg27039501 | SYNPO;SYNPO    | 5  | 0.04932785  | 0.417431055 | 0.542441526 |
| cg02991753 | SYNPO2         | 4  | 0.012831732 | 0.456290219 | 0.595487856 |

|            |               |    |             |             |             |
|------------|---------------|----|-------------|-------------|-------------|
| cg21544658 | SYT8          | 11 | 0.00025595  | 0.40374698  | 0.550097524 |
| cg02294791 | SYT8          | 11 | 0.000445316 | 0.432533131 | 0.571995952 |
| cg09575189 | SYT8          | 11 | 0.000930639 | 0.389335274 | 0.527821212 |
| cg24331162 | SYT8          | 11 | 0.000808406 | 0.365907195 | 0.492896919 |
| cg08428819 | TACC2;TACC2;  | 10 | 0.019673616 | 0.363868761 | 0.467064937 |
| cg03188793 | TALDO1        | 11 | 0.031824276 | 0.630123448 | 0.78803894  |
| cg02279883 | TANC2         | 17 | 0.003992536 | 0.299920577 | 0.406308715 |
| cg05689267 | TAP2;TAP2     | 6  | 0.000285823 | 0.558705524 | 0.660818953 |
| cg16030878 | TBC1D16       | 17 | 0.000221885 | 0.449424234 | 0.613518181 |
| cg04157865 | TBC1D16       | 17 | 0.005557211 | 0.440890809 | 0.578965499 |
| cg13466546 | TBC1D16       | 17 | 0.000643538 | 0.151501042 | 0.289128373 |
| cg07397612 | TBC1D22A      | 22 | 0.018908396 | 0.262124747 | 0.44484225  |
| cg00472758 | TBC1D24       | 16 | 0.00069418  | 0.355456299 | 0.469453589 |
| cg13304638 | TBCD          | 17 | 0.009153227 | 0.307751047 | 0.459922586 |
| cg15787636 | TBCD          | 17 | 0.000240783 | 0.651069684 | 0.773514993 |
| cg04216936 | TBCK;TBCK;TB  | 4  | 0.002118359 | 0.492747145 | 0.631051128 |
| cg09226275 | TBL1XR1       | 3  | 0.020301511 | 0.406195618 | 0.522447261 |
| cg03656099 | TBX2          | 17 | 7.47E-06    | 0.131375043 | 0.335046838 |
| cg07095230 | TBX2          | 17 | 0.002315441 | 0.334591917 | 0.473606395 |
| cg12999453 | TBX2          | 17 | 0.000185556 | 0.306732446 | 0.430795296 |
| cg16406892 | TBX3;TBX3     | 12 | 0.00057353  | 0.32492532  | 0.54280744  |
| cg22635491 | TBX3;TBX3     | 12 | 0.001081643 | 0.23815619  | 0.423090146 |
| cg16277169 | TBX3;TBX3     | 12 | 0.011528236 | 0.416494659 | 0.567851944 |
| cg13030332 | TBX3;TBX3     | 12 | 0.003525289 | 0.583490365 | 0.734693709 |
| cg01078446 | TBX3;TBX3     | 12 | 0.004014254 | 0.310789699 | 0.455105813 |
| cg09053536 | TBX3;TBX3     | 12 | 0.017312759 | 0.536822326 | 0.680444781 |
| cg13829104 | TBX3;TBX3     | 12 | 0.024036841 | 0.407478527 | 0.53419286  |
| cg11246938 | TBX3;TBX3     | 12 | 0.03079154  | 0.464908063 | 0.580985652 |
| cg00347620 | TBX3;TBX3     | 12 | 0.000430078 | 0.394372212 | 0.509657976 |
| cg26196480 | TBX5;TBX5     | 12 | 0.020849587 | 0.180335718 | 0.341967413 |
| cg06911121 | TBX5;TBX5     | 12 | 0.022096962 | 0.131303212 | 0.276565818 |
| cg16559598 | TBX5;TBX5     | 12 | 0.020459457 | 0.127163798 | 0.264156618 |
| cg05555207 | TBX5;TBX5     | 12 | 0.044318379 | 0.186743963 | 0.320813146 |
| cg17554126 | TBX5;TBX5;TB  | 12 | 0.016914594 | 0.204225148 | 0.379799079 |
| cg08184159 | TBX5;TBX5;TB  | 12 | 0.008111252 | 0.197845926 | 0.357842158 |
| cg06725552 | TBX5;TBX5;TB  | 12 | 0.032276722 | 0.165246164 | 0.32181698  |
| cg25399352 | TBX5;TBX5;TB  | 12 | 0.022747236 | 0.211618953 | 0.362604549 |
| cg18689332 | TBX5;TBX5;TB  | 12 | 0.026659601 | 0.141688419 | 0.288506529 |
| cg22929859 | TBX5;TBX5;TB  | 12 | 0.025178683 | 0.228642238 | 0.375319956 |
| cg14126466 | TBX5;TBX5;TB  | 12 | 0.026334301 | 0.400181086 | 0.536920049 |
| cg03559073 | TBX5;TBX5;TB  | 12 | 0.026285286 | 0.128507384 | 0.254537866 |
| cg03877376 | TBX5;TBX5;TB  | 12 | 0.044171462 | 0.114067664 | 0.219469683 |
| cg07168930 | TCF7L2;TCF7L2 | 10 | 0.031281402 | 0.342533536 | 0.469747382 |
| cg13033054 | TCP10L        | 21 | 0.002844519 | 0.564454567 | 0.67370882  |
| cg27081049 | TCP10L2       | 6  | 0.031928763 | 0.454410086 | 0.556826916 |
| cg15722533 | TEAD1         | 11 | 0.003237433 | 0.283695129 | 0.472216889 |

|            |                |    |             |             |             |
|------------|----------------|----|-------------|-------------|-------------|
| cg25878366 | TEAD1          | 11 | 0.01508316  | 0.29881937  | 0.463222447 |
| cg19127638 | TET1           | 10 | 0.001322364 | 0.409474911 | 0.57910092  |
| cg01093854 | TET1           | 10 | 0.022355514 | 0.312312457 | 0.47916014  |
| cg04066190 | TFAP2A;TFAP2   | 6  | 0.031167922 | 0.144178522 | 0.290664043 |
| cg19163067 | TFAP2E         | 1  | 0.000196741 | 0.329138012 | 0.430407767 |
| cg18335233 | TG             | 8  | 0.011175226 | 0.336967621 | 0.489994208 |
| cg11155356 | TG;SLA;SLA;SL  | 8  | 0.02743285  | 0.386494139 | 0.513975878 |
| cg16967578 | TGFB2;TGFB2    | 1  | 0.031560462 | 0.31718694  | 0.469450123 |
| cg03630790 | TGFBR2;TGFBF   | 3  | 0.006755663 | 0.476503366 | 0.617447137 |
| cg24719910 | TGFBR2;TGFBF   | 3  | 0.029361659 | 0.351554657 | 0.488562957 |
| cg05450916 | TGFBR2;TGFBF   | 3  | 0.02782307  | 0.342018304 | 0.467629974 |
| cg13724812 | TGFBR2;TGFBF   | 3  | 0.000112048 | 0.605810971 | 0.721307979 |
| cg04684014 | THADA;THADA    | 2  | 0.001100483 | 0.375890591 | 0.565697214 |
| cg11066033 | THAP4;THAP4;   | 2  | 0.005598538 | 0.155858864 | 0.281195552 |
| cg01637789 | THBS1          | 15 | 0.022606816 | 0.22702506  | 0.379207542 |
| cg16805094 | THBS2          | 6  | 0.009079894 | 0.266102853 | 0.385874397 |
| cg16504696 | THEMIS;THEM    | 6  | 0.045040713 | 0.576617017 | 0.683340119 |
| cg01190276 | THRB;THRB;TH   | 3  | 0.000693941 | 0.342931022 | 0.504592804 |
| cg16505204 | THRSP          | 11 | 0.032468615 | 0.128037953 | 0.235508887 |
| cg01083652 | THSD4          | 15 | 0.003240632 | 0.646506785 | 0.747490105 |
| cg17730176 | TIAF1;MYO18/   | 17 | 0.008139747 | 0.389015016 | 0.51797054  |
| cg13726166 | TIAF1;MYO18/   | 17 | 0.01625633  | 0.234878946 | 0.340874782 |
| cg06305026 | TIAM2          | 6  | 0.004211582 | 0.558356859 | 0.689172797 |
| cg04228709 | TIAM2;TIAM2    | 6  | 0.000234229 | 0.342539347 | 0.527854902 |
| cg09364590 | TIAM2;TIAM2    | 6  | 3.86E-05    | 0.281529447 | 0.402506261 |
| cg21707172 | TIAM2;TIAM2    | 6  | 0.001553122 | 0.380213281 | 0.484807958 |
| cg21539594 | TIE1           | 1  | 0.000459882 | 0.350107346 | 0.50641251  |
| cg26195652 | TIE1           | 1  | 0.005611337 | 0.468894229 | 0.606819895 |
| cg15106744 | TIPARP         | 3  | 0.02041047  | 0.337506865 | 0.491642036 |
| cg04860291 | TKT;TKT;TKT    | 3  | 0.005372152 | 0.3408344   | 0.472320546 |
| cg13895650 | TLE1           | 9  | 0.011138774 | 0.483474999 | 0.614709478 |
| cg09747445 | TLE3;TLE3;TLE: | 15 | 0.008854576 | 0.363713862 | 0.509338579 |
| cg24772525 | TLK1;TLK1      | 2  | 0.04553394  | 0.606796855 | 0.726579204 |
| cg02007434 | TLL2           | 10 | 0.004741697 | 0.572858063 | 0.706563906 |
| cg06800962 | TM4SF1         | 3  | 2.91E-05    | 0.116750146 | 0.258013177 |
| cg22612590 | TMCO3          | 13 | 0.031012231 | 0.623167767 | 0.732836569 |
| cg13241681 | TMCO3          | 13 | 0.007683147 | 0.674177916 | 0.775073774 |
| cg22355895 | TMED5;TMED!    | 1  | 0.028540428 | 0.456915787 | 0.574732394 |
| cg04223924 | TMEM131        | 2  | 0.029557868 | 0.481018593 | 0.597286025 |
| cg05708073 | TMEM167B       | 1  | 3.20E-05    | 0.334922786 | 0.47192815  |
| cg00584026 | TMEM175        | 4  | 0.041513111 | 0.253886495 | 0.357447421 |
| cg00621084 | TMEM194B       | 2  | 0.020326524 | 0.4765065   | 0.590502281 |
| cg14062152 | TMEM26         | 10 | 0.015075983 | 0.698563266 | 0.798737261 |
| cg14068176 | TMEM8B;TME     | 9  | 0.004979705 | 0.638865508 | 0.747469852 |
| cg25460340 | TMPRSS5        | 11 | 0.005996811 | 0.439629901 | 0.576806077 |
| cg23871994 | TMPRSS5        | 11 | 0.002533906 | 0.335431215 | 0.451943338 |

|            |               |    |             |             |             |
|------------|---------------|----|-------------|-------------|-------------|
| cg03191794 | TMTC2         | 12 | 0.027179809 | 0.471814818 | 0.593938184 |
| cg03406844 | TNFAIP6       | 2  | 0.000566226 | 0.558531486 | 0.679618732 |
| cg17471836 | TNFAIP8;TNFA  | 5  | 0.001200536 | 0.466596866 | 0.641658119 |
| cg07086380 | TNFAIP8;TNFA  | 5  | 0.014382661 | 0.235307874 | 0.38474906  |
| cg00765127 | TNFRSF10C     | 8  | 0.000302552 | 0.574861283 | 0.680080008 |
| cg26691200 | TNFRSF8       | 1  | 0.02680235  | 0.449252899 | 0.566346295 |
| cg15690400 | TNFRSF8;TNFR  | 1  | 0.019761613 | 0.318787785 | 0.481022025 |
| cg10425291 | TNFRSF8;TNFR  | 1  | 0.001467545 | 0.576983104 | 0.685023418 |
| cg09813400 | TNIP1         | 5  | 0.000893491 | 0.398634839 | 0.500574827 |
| cg20371378 | TNNI2;TNNI2;1 | 11 | 0.03647157  | 0.59180988  | 0.705407126 |
| cg17419660 | TNNT3;TNNT3   | 11 | 0.00302892  | 0.672340743 | 0.821333664 |
| cg18314765 | TNP1          | 2  | 0.002431457 | 0.306414039 | 0.527242698 |
| cg20310485 | TNP1          | 2  | 0.018495347 | 0.271902379 | 0.419854925 |
| cg10376763 | TNP1          | 2  | 0.005336393 | 0.557092219 | 0.687931016 |
| cg19673237 | TNP1          | 2  | 0.048937796 | 0.345483238 | 0.467649856 |
| cg06947694 | TNRC18        | 7  | 0.00295633  | 0.431555967 | 0.594211377 |
| cg20025824 | TNRC18        | 7  | 0.000802292 | 0.459723323 | 0.612401808 |
| cg00795125 | TNRC18        | 7  | 0.019563152 | 0.461907225 | 0.579251153 |
| cg03958512 | TNS3          | 7  | 0.000914185 | 0.383318574 | 0.617114119 |
| cg20782724 | TNS3          | 7  | 0.000287071 | 0.515587708 | 0.676068767 |
| cg24661184 | TNS3          | 7  | 0.004705215 | 0.374237523 | 0.52567716  |
| cg27275374 | TNS3          | 7  | 0.003372511 | 0.28912456  | 0.440458084 |
| cg15265085 | TNXB          | 6  | 5.35E-06    | 0.265339158 | 0.516318298 |
| cg24882324 | TNXB          | 6  | 3.09E-06    | 0.164261915 | 0.392961509 |
| cg12694372 | TNXB          | 6  | 4.18E-05    | 0.225016532 | 0.452597183 |
| cg16834823 | TNXB          | 6  | 0.000164298 | 0.203189676 | 0.40563675  |
| cg03556669 | TNXB          | 6  | 2.33E-06    | 0.254755004 | 0.444312066 |
| cg08650890 | TNXB          | 6  | 3.82E-05    | 0.253046948 | 0.436941113 |
| cg10365886 | TNXB          | 6  | 0.004648146 | 0.368642988 | 0.544911141 |
| cg15196197 | TNXB          | 6  | 0.000112747 | 0.143794669 | 0.310429067 |
| cg27081346 | TNXB          | 6  | 6.97E-06    | 0.182721575 | 0.343504273 |
| cg10923662 | TNXB          | 6  | 0.000774541 | 0.162110513 | 0.317941814 |
| cg02151997 | TNXB          | 6  | 0.02151492  | 0.336183797 | 0.490733551 |
| cg00525277 | TNXB          | 6  | 0.000143931 | 0.302302296 | 0.45539877  |
| cg01485117 | TNXB          | 6  | 8.23E-05    | 0.202630325 | 0.350531879 |
| cg14188106 | TNXB          | 6  | 0.004207639 | 0.262276387 | 0.410134884 |
| cg13698691 | TNXB          | 6  | 2.84E-05    | 0.177833548 | 0.324732691 |
| cg01992382 | TNXB          | 6  | 0.002347721 | 0.175075011 | 0.313743699 |
| cg19267551 | TNXB          | 6  | 0.003126277 | 0.25048824  | 0.387329455 |
| cg04757901 | TNXB          | 6  | 0.046851952 | 0.279005534 | 0.413199969 |
| cg00872984 | TNXB          | 6  | 0.002006169 | 0.325768528 | 0.459146621 |
| cg15745284 | TNXB          | 6  | 0.001202377 | 0.462470342 | 0.594296495 |
| cg13400512 | TNXB          | 6  | 1.57E-05    | 0.283841325 | 0.415115937 |
| cg27387193 | TNXB          | 6  | 0.007444809 | 0.305608377 | 0.436695233 |
| cg17662683 | TNXB          | 6  | 0.000260838 | 0.217604506 | 0.3484902   |
| cg01569346 | TNXB          | 6  | 0.000353262 | 0.322651159 | 0.448889853 |



|            |               |    |             |             |             |
|------------|---------------|----|-------------|-------------|-------------|
| cg07524919 | TNXB          | 6  | 0.034110719 | 0.301095013 | 0.425901452 |
| cg21642103 | TNXB          | 6  | 5.91E-05    | 0.217917357 | 0.339025671 |
| cg16385684 | TNXB          | 6  | 0.002150981 | 0.188030176 | 0.30589469  |
| cg26266427 | TNXB          | 6  | 0.015689455 | 0.332121223 | 0.441528511 |
| cg01337207 | TNXB          | 6  | 0.010687614 | 0.334308682 | 0.443510485 |
| cg08660959 | TNXB          | 6  | 0.010393272 | 0.205805007 | 0.309965788 |
| cg20414186 | TNXB          | 6  | 0.000137817 | 0.147411973 | 0.248725427 |
| cg05311626 | TOLLIP        | 11 | 0.048611047 | 0.147831036 | 0.256841014 |
| cg17591574 | TOR3A         | 1  | 0.027685488 | 0.171041029 | 0.286655345 |
| cg18389810 | TPPP2         | 14 | 0.015138509 | 0.167210068 | 0.275160595 |
| cg10096948 | TPPP3;TPPP3;Z | 16 | 0.000168795 | 0.270269057 | 0.419755635 |
| cg00391741 | TPRA1;TPRA1   | 3  | 0.000177392 | 0.548273836 | 0.681599606 |
| cg14392772 | TRAF1         | 9  | 0.000919581 | 0.430183601 | 0.562665361 |
| cg11723904 | TRAP1         | 16 | 0.049708759 | 0.475579263 | 0.581512536 |
| cg18219994 | TRAPPC9;TRAF  | 8  | 0.002975606 | 0.344098577 | 0.50010063  |
| cg08504029 | TRAPPC9;TRAF  | 8  | 0.012515276 | 0.318066119 | 0.426515702 |
| cg02528189 | TRAPPC9;TRAF  | 8  | 0.003258403 | 0.28073745  | 0.38847303  |
| cg09145126 | TRIM13;TRIM1  | 13 | 0.012142941 | 0.235535844 | 0.340762357 |
| cg08322448 | TRIM2;TRIM2   | 4  | 0.001925997 | 0.528065281 | 0.660591805 |
| cg02616418 | TRIM2;TRIM2;  | 4  | 0.029474135 | 0.276067907 | 0.393758325 |
| cg12600843 | TRIM26        | 6  | 0.004284154 | 0.469487088 | 0.573438357 |
| cg27351624 | TRIM31        | 6  | 0.002166606 | 0.426173728 | 0.572120185 |
| cg12077698 | TRIM62        | 1  | 0.024547935 | 0.371776874 | 0.510438561 |
| cg10179300 | TRIO          | 5  | 0.044892995 | 0.576048525 | 0.676148724 |
| cg19017254 | TRPM4         | 19 | 0.007098662 | 0.495177708 | 0.603708128 |
| cg14762845 | TRPV1;TRPV1;  | 17 | 0.001539461 | 0.741802222 | 0.848419131 |
| cg14373396 | TRPV1;TRPV1;  | 17 | 0.005161898 | 0.716066522 | 0.841196199 |
| cg11384744 | TSPAN13       | 7  | 6.99E-06    | 0.174667339 | 0.300191318 |
| cg22800295 | TSPAN9;TSPAN  | 12 | 0.000458204 | 0.661951103 | 0.770019821 |
| cg25672027 | TSPO;TSPO     | 22 | 0.001850478 | 0.301577471 | 0.461394615 |
| cg03025986 | TSSC1         | 2  | 0.002888012 | 0.565608614 | 0.689008141 |
| cg14483162 | TTC1          | 5  | 0.004014103 | 0.341152599 | 0.443376491 |
| cg04176452 | TTC9          | 14 | 0.000482283 | 0.651962278 | 0.754498009 |
| cg04458567 | TTL           | 2  | 0.02072635  | 0.387778102 | 0.539413977 |
| cg05545910 | TLL1;TLL1     | 22 | 0.008638995 | 0.377498304 | 0.523553498 |
| cg10172253 | TLL7          | 1  | 0.002302539 | 0.67444969  | 0.775532739 |
| cg04007987 | TTYH2         | 17 | 0.000240984 | 0.571027398 | 0.716323641 |
| cg05519002 | TUB;TUB       | 11 | 0.014720275 | 0.287101182 | 0.399235788 |
| cg10133610 | TUBB2B        | 6  | 0.047801939 | 0.439267644 | 0.562564415 |
| cg19987965 | TULP4;TULP4;  | 6  | 0.006041489 | 0.305570469 | 0.532888159 |
| cg13068216 | TULP4;TULP4;  | 6  | 0.001752247 | 0.221314454 | 0.43747316  |
| cg12601856 | TULP4;TULP4;  | 6  | 0.00395788  | 0.276342086 | 0.490748073 |
| cg18978680 | TULP4;TULP4;  | 6  | 0.019880237 | 0.240122458 | 0.420977612 |
| cg02060443 | TULP4;TULP4;  | 6  | 0.023623643 | 0.481602432 | 0.653382144 |
| cg23816737 | TULP4;TULP4;  | 6  | 0.031168838 | 0.173192999 | 0.311205952 |
| cg18336854 | TUSC3;TUSC3   | 8  | 0.001754649 | 0.52393731  | 0.64840205  |

|            |               |    |             |             |             |
|------------|---------------|----|-------------|-------------|-------------|
| cg18320111 | TWSG1         | 18 | 0.003647726 | 0.447214185 | 0.610933985 |
| cg13429733 | TXNDC8        | 9  | 2.25E-05    | 0.549664675 | 0.655592464 |
| cg09561830 | UBAC2;MIR62:  | 13 | 0.002854148 | 0.124758534 | 0.227482617 |
| cg21302563 | UBE2F         | 2  | 0.03972677  | 0.546236289 | 0.649781941 |
| cg17869799 | UBE2J2;UBE2J: | 1  | 0.016277314 | 0.585854314 | 0.694977865 |
| cg13453589 | UBE2R2        | 9  | 0.001023386 | 0.303731821 | 0.437108998 |
| cg12934016 | UBE3A;UBE3A   | 15 | 0.039293144 | 0.417510289 | 0.534088527 |
| cg10402321 | UBXN11;UBXN   | 1  | 0.003462783 | 0.282631941 | 0.401395728 |
| cg12407791 | UNC13D        | 17 | 8.99E-05    | 0.29257463  | 0.428347091 |
| cg07151747 | UPP2;UPP2     | 2  | 0.003947685 | 0.306778133 | 0.422301626 |
| cg19985030 | USH1G         | 17 | 0.012485901 | 0.441438343 | 0.560267894 |
| cg04431002 | USP10         | 16 | 0.015161571 | 0.305647224 | 0.442441831 |
| cg24427271 | USP36         | 17 | 0.031513406 | 0.400359632 | 0.544847131 |
| cg18766900 | USP6NL;USP6N  | 10 | 0.014839659 | 0.308968364 | 0.449818295 |
| cg06528737 | USP6NL;USP6N  | 10 | 0.016882675 | 0.433446637 | 0.572497859 |
| cg20625138 | UTS2;UTS2     | 1  | 0.000759639 | 0.248455938 | 0.441364669 |
| cg10262662 | VAC14         | 16 | 0.006841286 | 0.407833921 | 0.507893768 |
| cg17428922 | VARS2;VARS2;  | 6  | 0.022927115 | 0.419405704 | 0.520142497 |
| cg14286025 | VAV2;VAV2     | 9  | 0.002269679 | 0.202500107 | 0.322471825 |
| cg13954067 | VAV2;VAV2     | 9  | 0.014442809 | 0.090885419 | 0.210848983 |
| cg14137625 | VAV2;VAV2     | 9  | 0.001698452 | 0.324224447 | 0.432335372 |
| cg19413693 | VAV3          | 1  | 0.00023862  | 0.496956351 | 0.670555283 |
| cg04223006 | VCAN;VCAN;V   | 5  | 0.007819832 | 0.175852878 | 0.284829702 |
| cg22658311 | VEGFC         | 4  | 0.00024126  | 0.307036364 | 0.480638016 |
| cg08423851 | VGLL4;VGLL4   | 3  | 0.016963456 | 0.325671994 | 0.433873953 |
| cg08815359 | VGLL4;VGLL4;\ | 3  | 0.00150194  | 0.604695857 | 0.72882236  |
| cg13336326 | VIPR2         | 7  | 0.042446614 | 0.383472004 | 0.555573039 |
| cg18576301 | VPS13B;VPS13  | 8  | 0.000668145 | 0.394764552 | 0.554090292 |
| cg18224970 | VPS13B;VPS13  | 8  | 0.048542686 | 0.385526221 | 0.490792603 |
| cg11599718 | VPS37B        | 12 | 0.00055022  | 0.48091741  | 0.638144442 |
| cg09537568 | WDFY3;WDFY:   | 4  | 0.002412627 | 0.34303215  | 0.518524184 |
| cg00598021 | WDR1;WDR1     | 4  | 0.036432795 | 0.402647434 | 0.503236549 |
| cg11093939 | WDR25;WDR2    | 14 | 0.000615468 | 0.494276587 | 0.649639061 |
| cg07822618 | WDR60         | 7  | 0.020073178 | 0.25308405  | 0.377865168 |
| cg23802150 | WDR8          | 1  | 0.003399024 | 0.665981831 | 0.776492313 |
| cg02298472 | WNT5A         | 3  | 0.000141864 | 0.33497003  | 0.531692829 |
| cg01777121 | WNT5A         | 3  | 0.000401455 | 0.206543296 | 0.364069397 |
| cg18562578 | WNT5A         | 3  | 0.000737452 | 0.254969806 | 0.389434556 |
| cg24216596 | WNT5A         | 3  | 0.000496543 | 0.352058053 | 0.485222563 |
| cg04941246 | WNT5A         | 3  | 0.001394535 | 0.200035589 | 0.326047769 |
| cg20746482 | WNT5A         | 3  | 0.000682493 | 0.15692236  | 0.274896378 |
| cg25891078 | WNT5B;WNT5    | 12 | 0.000404921 | 0.639936151 | 0.764989727 |
| cg10716612 | WWC2          | 4  | 0.007554236 | 0.257911325 | 0.377890022 |
| cg17419475 | WWC2          | 4  | 0.004320059 | 0.610507768 | 0.723307994 |
| cg09036558 | WWP2;WWP2     | 16 | 0.002092819 | 0.192642586 | 0.349584684 |
| cg01656717 | WWP2;WWP2     | 16 | 0.014522002 | 0.150160297 | 0.284789171 |

|            |                 |    |             |             |             |
|------------|-----------------|----|-------------|-------------|-------------|
| cg26929355 | WWP2;WWP2       | 16 | 0.002737594 | 0.201314458 | 0.303514332 |
| cg27186420 | WWP2;WWP2       | 16 | 0.002111208 | 0.582869624 | 0.684196382 |
| cg14514120 | XPOT            | 12 | 0.004943552 | 0.309033501 | 0.438639076 |
| cg06635133 | XYLT1           | 16 | 0.00345627  | 0.1396428   | 0.308608385 |
| cg04986899 | XYLT1           | 16 | 0.009430841 | 0.392432266 | 0.560168768 |
| cg22864414 | ZBED4           | 22 | 0.001890577 | 0.652624775 | 0.761881006 |
| cg11049439 | ZBTB12          | 6  | 0.022279047 | 0.184660405 | 0.322755026 |
| cg12026858 | ZBTB16;ZBTB1    | 11 | 0.017682534 | 0.328758618 | 0.488391428 |
| cg14596967 | ZBTB16;ZBTB1    | 11 | 0.002008862 | 0.449723831 | 0.566328251 |
| cg17518710 | ZBTB16;ZBTB1    | 11 | 0.00187536  | 0.294125546 | 0.402885342 |
| cg02936049 | ZBTB38          | 3  | 0.000826841 | 0.287674559 | 0.406346295 |
| cg14918743 | ZBTB42          | 14 | 0.015375556 | 0.294680645 | 0.425880819 |
| cg12688965 | ZC3H3           | 8  | 0.000619127 | 0.254213712 | 0.444922477 |
| cg13191508 | ZC3H3           | 8  | 0.020239885 | 0.22296933  | 0.344918124 |
| cg19972822 | ZC3HAV1;ZC3H3   | 7  | 0.001608276 | 0.327928659 | 0.450247648 |
| cg07875215 | ZDHHC14;ZDHHC14 | 6  | 6.46E-06    | 0.593946477 | 0.737509432 |
| cg17310882 | ZDHHC14;ZDHHC14 | 6  | 0.000690708 | 0.16615574  | 0.307779649 |
| cg16679543 | ZDHHC14;ZDHHC14 | 6  | 0.002189566 | 0.703385959 | 0.807867466 |
| cg22618752 | ZEB2;ZEB2       | 2  | 0.002320213 | 0.450943252 | 0.567321271 |
| cg08858926 | ZFHX3;ZFHX3     | 16 | 0.008526532 | 0.470431724 | 0.607270904 |
| cg13154413 | ZFYVE21         | 14 | 0.008123948 | 0.397150477 | 0.528935422 |
| cg10898258 | ZFYVE21         | 14 | 0.001330207 | 0.54371298  | 0.644016496 |
| cg08489478 | ZFYVE27;ZFYVE27 | 10 | 0.005110068 | 0.459133628 | 0.616375123 |
| cg21571166 | ZIC1            | 3  | 0.010434819 | 0.224041587 | 0.359814185 |
| cg14825905 | ZMIZ1           | 10 | 0.020710001 | 0.204151352 | 0.336241266 |
| cg13676902 | ZMIZ1           | 10 | 0.002826917 | 0.585220983 | 0.713891984 |
| cg03707696 | ZMIZ1           | 10 | 0.001463943 | 0.626066285 | 0.741017139 |
| cg02851873 | ZMIZ1           | 10 | 0.005667891 | 0.301687852 | 0.415505919 |
| cg02743070 | ZMIZ1           | 10 | 0.00174192  | 0.330134288 | 0.438047216 |
| cg15733068 | ZMIZ1           | 10 | 0.010073421 | 0.402126844 | 0.506173547 |
| cg26300785 | ZMIZ1           | 10 | 0.002488849 | 0.58942496  | 0.692647856 |
| cg05141341 | ZMIZ2;ZMIZ2     | 7  | 0.03730084  | 0.214722189 | 0.33219137  |
| cg23596567 | ZNF18           | 17 | 0.022274107 | 0.429174311 | 0.536936029 |
| cg13495227 | ZNF277          | 7  | 0.000532616 | 0.662244507 | 0.769374064 |
| cg25407227 | ZNF331;ZNF331   | 19 | 0.002040885 | 0.609897522 | 0.717919306 |
| cg02712553 | ZNF365;ZNF365   | 10 | 0.003209683 | 0.621570322 | 0.72881681  |
| cg04710768 | ZNF366          | 5  | 0.000261418 | 0.189691072 | 0.332367871 |
| cg15872458 | ZNF385A;ZNF385A | 12 | 0.000657889 | 0.402975988 | 0.592738899 |
| cg06186992 | ZNF423          | 16 | 0.007528712 | 0.497497449 | 0.630341948 |
| cg10030162 | ZNF423          | 16 | 0.005147891 | 0.286670289 | 0.41409451  |
| cg03825158 | ZNF423          | 16 | 0.005996811 | 0.65097195  | 0.762205299 |
| cg10120897 | ZNF469          | 16 | 0.018761417 | 0.334241016 | 0.461215177 |
| cg03487027 | ZNF503          | 10 | 0.003462    | 0.543298178 | 0.657276712 |
| cg13997975 | ZNF503          | 10 | 0.015192523 | 0.580666897 | 0.684974611 |
| cg16284674 | ZNF511;TUBG1    | 10 | 0.00738873  | 0.31127155  | 0.480858474 |
| cg25401010 | ZNF532          | 18 | 0.021727621 | 0.419023717 | 0.558264694 |

|            |              |    |             |             |             |
|------------|--------------|----|-------------|-------------|-------------|
| cg23309969 | ZNF532       | 18 | 0.024531431 | 0.427641327 | 0.546281755 |
| cg18231690 | ZNF592       | 15 | 0.004053472 | 0.194942317 | 0.336108351 |
| cg05957504 | ZNF608       | 5  | 0.005862964 | 0.267055107 | 0.44098458  |
| cg23598573 | ZNF609       | 15 | 0.012515276 | 0.459274595 | 0.605795501 |
| cg08462055 | ZNF609       | 15 | 0.000346137 | 0.518931445 | 0.642285954 |
| cg11964338 | ZNF610;ZNF61 | 19 | 0.049601211 | 0.358650952 | 0.475680966 |
| cg23257184 | ZNF681       | 19 | 0.049806247 | 0.523425202 | 0.626652099 |
| cg14359798 |              | 11 | 5.08E-05    | 0.217125501 | 0.507948996 |
| cg14638919 |              | 9  | 0.026944018 | 0.483545569 | 0.730222494 |
| cg26671988 |              | 5  | 2.57E-06    | 0.344785925 | 0.583494232 |
| cg22305850 |              | 2  | 0.008785623 | 0.356734566 | 0.592553363 |
| cg24697097 |              | 10 | 0.008766843 | 0.498364818 | 0.720352748 |
| cg08773226 |              | 6  | 2.69E-05    | 0.474690428 | 0.695848309 |
| cg23429664 |              | 10 | 0.003967184 | 0.293026718 | 0.51320731  |
| cg04051365 |              | 3  | 0.000240984 | 0.2676817   | 0.484088895 |
| cg07216619 |              | 15 | 0.046880249 | 0.439066929 | 0.654192793 |
| cg02571436 |              | 10 | 0.004114095 | 0.150132444 | 0.356005485 |
| cg04589649 |              | 2  | 0.013958098 | 0.245863733 | 0.450589896 |
| cg19067025 |              | 15 | 0.003115838 | 0.3005343   | 0.503275501 |
| cg24692595 |              | 3  | 0.001042432 | 0.465444902 | 0.668105803 |
| cg19128113 |              | 4  | 0.00735014  | 0.359605527 | 0.560691515 |
| cg04095226 |              | 6  | 0.00114884  | 0.329385252 | 0.530138147 |
| cg13363575 |              | 2  | 0.017692389 | 0.423826829 | 0.622325149 |
| cg23678364 |              | 4  | 0.010961497 | 0.217049114 | 0.413115151 |
| cg22615203 |              | 13 | 0.002858249 | 0.249611659 | 0.445560468 |
| cg18558476 |              | 3  | 0.001394442 | 0.345091158 | 0.540818802 |
| cg14445366 |              | 17 | 0.000106049 | 0.20069928  | 0.396425344 |
| cg05778278 |              | 8  | 7.56E-06    | 0.38374717  | 0.576825916 |
| cg09767588 |              | 1  | 0.006159863 | 0.270181943 | 0.462989815 |
| cg23756265 |              | 11 | 0.000225282 | 0.300968797 | 0.493233521 |
| cg14523804 |              | 17 | 0.00062862  | 0.449116888 | 0.641321562 |
| cg14833626 |              | 4  | 0.000943523 | 0.22262646  | 0.411702354 |
| cg22336669 |              | 12 | 0.001263226 | 0.335235718 | 0.523941467 |
| cg18394648 |              | 5  | 0.009498874 | 0.706668658 | 0.894869251 |
| cg17540450 |              | 13 | 0.000624407 | 0.209534852 | 0.396151217 |
| cg08672919 |              | 6  | 0.000769191 | 0.254362466 | 0.439794362 |
| cg11746048 |              | 11 | 0.01385968  | 0.273397339 | 0.458484432 |
| cg16976599 |              | 2  | 0.003465851 | 0.416154585 | 0.601025892 |
| cg08037719 |              | 1  | 0.001743688 | 0.362348831 | 0.546646939 |
| cg15814150 |              | 4  | 0.002120756 | 0.476348239 | 0.660249771 |
| cg25695992 |              | 2  | 0.00416437  | 0.434500015 | 0.618054197 |
| cg15444831 |              | 10 | 0.000207631 | 0.459819166 | 0.642938917 |
| cg08550517 |              | 16 | 0.000406936 | 0.174164267 | 0.356750175 |
| cg24680439 |              | 10 | 0.024607435 | 0.350287761 | 0.53193421  |
| cg10548805 |              | 14 | 0.005471188 | 0.244256272 | 0.424491354 |
| cg20062681 |              | 11 | 5.87E-05    | 0.318727229 | 0.498913227 |

|            |    |             |             |             |
|------------|----|-------------|-------------|-------------|
| cg10717691 | 1  | 8.85E-05    | 0.146003351 | 0.325549682 |
| cg04908380 | 1  | 3.24E-05    | 0.451912275 | 0.631379979 |
| cg18239481 | 10 | 0.002312355 | 0.180055097 | 0.358180031 |
| cg19907293 | 2  | 0.005008129 | 0.343368619 | 0.520009994 |
| cg18412185 | 1  | 0.000206777 | 0.207647727 | 0.384134269 |
| cg10421739 | 6  | 0.010046064 | 0.307439556 | 0.48389266  |
| cg22653878 | 6  | 9.99E-07    | 0.466254092 | 0.642684002 |
| cg24415066 | 4  | 0.020613189 | 0.365966178 | 0.542117495 |
| cg26472326 | 5  | 0.000952888 | 0.252528094 | 0.428640558 |
| cg06450976 | 6  | 1.15E-05    | 0.563014097 | 0.73861106  |
| cg24823979 | 6  | 0.018688498 | 0.439296053 | 0.61471216  |
| cg27651238 | 12 | 0.000153014 | 0.322171888 | 0.497473861 |
| cg16397176 | 5  | 1.76E-05    | 0.220216336 | 0.395363989 |
| cg07545858 | 16 | 0.003447668 | 0.327617277 | 0.502299635 |
| cg09002358 | 5  | 0.000218031 | 0.22420985  | 0.398840042 |
| cg18064917 | 2  | 0.005224592 | 0.359494825 | 0.534042263 |
| cg07052737 | 2  | 1.79E-05    | 0.322103673 | 0.495437047 |
| cg23201188 | 3  | 0.003260571 | 0.275040268 | 0.44787989  |
| cg16163174 | 6  | 0.00270085  | 0.336541757 | 0.508647241 |
| cg23340777 | 12 | 0.00841208  | 0.217955536 | 0.389577242 |
| cg13419345 | 3  | 0.003297047 | 0.353637064 | 0.525075111 |
| cg26848957 | 17 | 0.006808195 | 0.415393253 | 0.586791505 |
| cg21283066 | 6  | 5.12E-05    | 0.31595492  | 0.485689191 |
| cg16312496 | 7  | 0.002740647 | 0.301813716 | 0.471533323 |
| cg10583319 | 20 | 0.000926995 | 0.277952466 | 0.447348959 |
| cg24529237 | 6  | 0.002765464 | 0.479863792 | 0.648770465 |
| cg05098589 | 10 | 0.000458663 | 0.546049004 | 0.714761668 |
| cg19747659 | 8  | 0.000233009 | 0.527154064 | 0.695797824 |
| cg12809483 | 5  | 0.005930412 | 0.293121025 | 0.46170852  |
| cg07704235 | 18 | 0.000218639 | 0.551166102 | 0.719662482 |
| cg17209471 | 22 | 0.027017742 | 0.268210221 | 0.436011398 |
| cg17017878 | 6  | 0.009720912 | 0.187128117 | 0.354879363 |
| cg24006770 | 1  | 0.008415591 | 0.355367361 | 0.522941149 |
| cg16450677 | 2  | 0.000492257 | 0.265513431 | 0.431839258 |
| cg00792968 | 13 | 0.006596904 | 0.379000724 | 0.544686732 |
| cg23253674 | 6  | 0.008395162 | 0.334440851 | 0.500118727 |
| cg15983072 | 2  | 0.002100686 | 0.354926984 | 0.520590767 |
| cg00927503 | 2  | 0.00078533  | 0.531598364 | 0.696770476 |
| cg02522990 | 16 | 0.000105491 | 0.445666407 | 0.610483449 |
| cg09692670 | 15 | 0.000611787 | 0.377144753 | 0.541908418 |
| cg15257489 | 8  | 0.004150196 | 0.173606661 | 0.33821607  |
| cg19363785 | 8  | 0.000353262 | 0.409841149 | 0.574418447 |
| cg06976222 | 1  | 0.034571995 | 0.487007192 | 0.6511772   |
| cg17969662 | 1  | 0.000735199 | 0.438793664 | 0.602769425 |
| cg03703733 | 6  | 0.004093749 | 0.450716234 | 0.614230725 |
| cg24636944 | 5  | 0.001091572 | 0.377197574 | 0.539776493 |

|            |    |             |             |             |
|------------|----|-------------|-------------|-------------|
| cg00866541 | 16 | 0.007153247 | 0.402220905 | 0.564484919 |
| cg01050429 | 5  | 0.034796026 | 0.338723954 | 0.500900624 |
| cg03529261 | 4  | 1.50E-05    | 0.558656489 | 0.720593254 |
| cg12201544 | 6  | 0.002760908 | 0.263320646 | 0.424969423 |
| cg14256511 | 12 | 0.000360692 | 0.461518668 | 0.623032944 |
| cg14799129 | 3  | 0.001496834 | 0.450394639 | 0.611568699 |
| cg20462493 | 5  | 0.013980478 | 0.279157868 | 0.440129172 |
| cg14328408 | 9  | 0.003753785 | 0.285594264 | 0.446131281 |
| cg04239863 | 16 | 0.000166306 | 0.288832142 | 0.449233849 |
| cg18784875 | 12 | 0.003372511 | 0.325093653 | 0.485222359 |
| cg13375466 | 8  | 0.006988327 | 0.455703226 | 0.615609785 |
| cg23681616 | 17 | 0.003669024 | 0.517273985 | 0.677156065 |
| cg04672622 | 12 | 0.000430877 | 0.447456901 | 0.607164478 |
| cg19480965 | 6  | 0.0160906   | 0.205800201 | 0.36549362  |
| cg15924102 | 1  | 0.032424599 | 0.29962731  | 0.459253633 |
| cg06212297 | 16 | 0.000100772 | 0.459793618 | 0.61928488  |
| cg08211704 | 8  | 0.000141698 | 0.471913174 | 0.631135171 |
| cg14123436 | 9  | 0.01275599  | 0.231274915 | 0.390106227 |
| cg17615115 | 17 | 0.000143376 | 0.327499785 | 0.486243315 |
| cg06213047 | 16 | 0.018340302 | 0.235322503 | 0.393794951 |
| cg23062357 | 14 | 4.79E-06    | 0.616884812 | 0.775149369 |
| cg20073893 | 14 | 0.001967499 | 0.331441727 | 0.489498892 |
| cg10297792 | 12 | 0.006342709 | 0.277083092 | 0.435039392 |
| cg26818573 | 2  | 0.001041068 | 0.474863138 | 0.632595781 |
| cg00942552 | 3  | 0.0039736   | 0.467333484 | 0.624895605 |
| cg16426034 | 11 | 0.02148766  | 0.203683816 | 0.360886981 |
| cg09437523 | 16 | 0.009642773 | 0.409284574 | 0.566186825 |
| cg23417171 | 7  | 5.93E-06    | 0.605684671 | 0.76209413  |
| cg00879824 | 6  | 0.001055398 | 0.267150192 | 0.423161494 |
| cg21800284 | 12 | 0.000164066 | 0.237893724 | 0.393850652 |
| cg13755270 | 3  | 0.003471294 | 0.189583956 | 0.345279413 |
| cg17008160 | 1  | 0.000146694 | 0.437402605 | 0.593057307 |
| cg06228407 | 2  | 0.027543249 | 0.355349353 | 0.510977981 |
| cg16362189 | 11 | 0.029958102 | 0.289741258 | 0.444525432 |
| cg01744607 | 15 | 0.005564673 | 0.337096822 | 0.491853735 |
| cg22117825 | 4  | 0.005657979 | 0.41056211  | 0.564815477 |
| cg08726846 | 4  | 0.007923249 | 0.501373351 | 0.655365811 |
| cg00723994 | 12 | 0.000190588 | 0.243886952 | 0.397806691 |
| cg00750630 | 14 | 0.002025917 | 0.472210906 | 0.626062304 |
| cg15224626 | 6  | 0.004209718 | 0.476182171 | 0.629338072 |
| cg00060800 | 5  | 0.000504405 | 0.335673692 | 0.488564084 |
| cg03160656 | 4  | 0.028453477 | 0.375540228 | 0.5281754   |
| cg00909401 | 2  | 0.002462493 | 0.488757446 | 0.64105895  |
| cg25464265 | 1  | 0.028550465 | 0.332786624 | 0.484757474 |
| cg25552018 | 1  | 0.012270287 | 0.331974845 | 0.483655569 |
| cg15824962 | 1  | 0.043222327 | 0.159489751 | 0.31069931  |

|            |    |             |             |             |
|------------|----|-------------|-------------|-------------|
| cg07099073 | 6  | 0.003704761 | 0.591352514 | 0.74217205  |
| cg03464765 | 11 | 0.009166232 | 0.494836715 | 0.645332386 |
| cg15942368 | 7  | 0.026510956 | 0.362645985 | 0.513065139 |
| cg16864819 | 11 | 0.009436366 | 0.419922906 | 0.570260317 |
| cg21470704 | 2  | 0.002926135 | 0.284316695 | 0.434468095 |
| cg23362032 | 7  | 0.000405691 | 0.257742932 | 0.407582243 |
| cg07621853 | 2  | 0.007644645 | 0.539071567 | 0.68888654  |
| cg02140384 | 1  | 0.025220526 | 0.284531005 | 0.434274567 |
| cg17082026 | 13 | 0.012503105 | 0.404965506 | 0.554345308 |
| cg20101110 | 11 | 0.014491706 | 0.230461039 | 0.379733148 |
| cg00392155 | 2  | 0.002687479 | 0.374692738 | 0.523914293 |
| cg16277843 | 6  | 1.16E-05    | 0.404100091 | 0.552956112 |
| cg03155825 | 7  | 0.021173676 | 0.228303166 | 0.37700518  |
| cg20951255 | 7  | 1.36E-05    | 0.138361206 | 0.286987153 |
| cg06250886 | 6  | 0.010745432 | 0.52126985  | 0.669575373 |
| cg16912563 | 10 | 0.009153227 | 0.336243538 | 0.48429481  |
| cg09214892 | 16 | 0.005768267 | 0.501110717 | 0.648979471 |
| cg21814185 | 4  | 0.004247068 | 0.333582296 | 0.481044973 |
| cg07591229 | 2  | 3.00E-05    | 0.229657353 | 0.377069465 |
| cg03893901 | 6  | 0.001336707 | 0.493590827 | 0.640753837 |
| cg06597413 | 11 | 0.000241291 | 0.333071419 | 0.480041917 |
| cg22237668 | 12 | 0.022302457 | 0.16748146  | 0.314208247 |
| cg18135489 | 11 | 0.006994834 | 0.249110209 | 0.395725558 |
| cg11938832 | 2  | 0.00132737  | 0.594011887 | 0.740597293 |
| cg04213390 | 2  | 8.29E-05    | 0.124857644 | 0.271398265 |
| cg24720008 | 10 | 0.000243956 | 0.204434191 | 0.350711554 |
| cg17144548 | 2  | 3.82E-05    | 0.588010119 | 0.734199906 |
| cg04658679 | 12 | 0.039314296 | 0.238309072 | 0.384166551 |
| cg15699099 | 2  | 0.015646008 | 0.2742963   | 0.420057135 |
| cg20886660 | 13 | 0.008528299 | 0.445682972 | 0.591376403 |
| cg05192538 | 10 | 0.008779973 | 0.541757144 | 0.686995859 |
| cg19718306 | 3  | 0.000302712 | 0.32589437  | 0.470913907 |
| cg08549390 | 7  | 0.009783689 | 0.128366775 | 0.273075405 |
| cg20933897 | 17 | 0.007327355 | 0.415463566 | 0.560145929 |
| cg12756312 | 11 | 0.005623759 | 0.555347868 | 0.699593385 |
| cg06575772 | 8  | 0.000325526 | 0.494086396 | 0.638008747 |
| cg14482712 | 15 | 0.000644812 | 0.262664336 | 0.406462233 |
| cg06521347 | 8  | 0.017204335 | 0.335892029 | 0.479673443 |
| cg01976921 | 8  | 2.14E-05    | 0.322853572 | 0.466493394 |
| cg04063906 | 7  | 0.003219762 | 0.467605984 | 0.611212003 |
| cg26944426 | 7  | 9.66E-05    | 0.354636137 | 0.498129429 |
| cg13802981 | 13 | 0.000599864 | 0.302485919 | 0.445973698 |
| cg26994894 | 16 | 2.78E-05    | 0.685921089 | 0.829125914 |
| cg27099293 | 10 | 0.025728914 | 0.557679727 | 0.700484767 |
| cg19987900 | 14 | 0.015325225 | 0.421659352 | 0.564209106 |
| cg04075986 | 7  | 1.94E-05    | 0.212517133 | 0.355005862 |

|            |    |             |             |             |
|------------|----|-------------|-------------|-------------|
| cg16924929 | 3  | 0.024179559 | 0.335787954 | 0.478052549 |
| cg18493761 | 11 | 0.001120008 | 0.346025781 | 0.488251113 |
| cg01975934 | 8  | 0.02528983  | 0.31277772  | 0.454749722 |
| cg22687766 | 1  | 1.76E-05    | 0.267025652 | 0.408349358 |
| cg21737020 | 17 | 6.66E-05    | 0.428521633 | 0.569784254 |
| cg06214869 | 7  | 0.039588283 | 0.270139472 | 0.411163671 |
| cg15192041 | 11 | 0.003515937 | 0.468476777 | 0.609463594 |
| cg09089118 | 7  | 0.00118493  | 0.250004297 | 0.390940641 |
| cg18631996 | 5  | 0.000109188 | 0.190845436 | 0.331760293 |
| cg05843312 | 7  | 0.003274621 | 0.227340041 | 0.368253063 |
| cg12668649 | 3  | 0.006433436 | 0.418802286 | 0.559493234 |
| cg08301211 | 6  | 0.001752969 | 0.485681434 | 0.626032506 |
| cg07584582 | 22 | 0.03053534  | 0.270779909 | 0.411101224 |
| cg27057027 | 7  | 0.001196981 | 0.321917704 | 0.462146016 |
| cg13897222 | 1  | 3.69E-05    | 0.692190596 | 0.832350105 |
| cg18469813 | 6  | 0.00342365  | 0.327482824 | 0.467537102 |
| cg00931957 | 1  | 0.00684948  | 0.520221794 | 0.660046224 |
| cg27392395 | 8  | 0.00174192  | 0.627934796 | 0.767321338 |
| cg01243072 | 2  | 0.000378619 | 0.22730929  | 0.366584039 |
| cg14380474 | 1  | 0.038335178 | 0.460101384 | 0.599190319 |
| cg10932916 | 5  | 0.013506588 | 0.320359919 | 0.459364636 |
| cg22996742 | 6  | 0.001421175 | 0.416715968 | 0.555595898 |
| cg09579989 | 12 | 0.00134302  | 0.469818591 | 0.608611855 |
| cg06139749 | 7  | 0.013847018 | 0.187465908 | 0.325966452 |
| cg21342910 | 17 | 3.91E-06    | 0.126052129 | 0.264529435 |
| cg12109883 | 15 | 0.012925929 | 0.179510614 | 0.317804609 |
| cg17793497 | 15 | 0.031840976 | 0.274485254 | 0.412634763 |
| cg12182580 | 11 | 0.000586881 | 0.525872425 | 0.663983526 |
| cg02067239 | 16 | 0.047690224 | 0.221939373 | 0.360050141 |
| cg20076301 | 8  | 0.007915919 | 0.4691052   | 0.607049704 |
| cg06720014 | 1  | 0.018655282 | 0.361796793 | 0.499461959 |
| cg22442352 | 5  | 0.000126336 | 0.622685007 | 0.760239501 |
| cg13852730 | 15 | 1.24E-05    | 0.605205768 | 0.742749646 |
| cg26509250 | 2  | 0.004716669 | 0.43756608  | 0.575094866 |
| cg05998301 | 2  | 0.017589762 | 0.383275525 | 0.520766225 |
| cg24757926 | 3  | 0.002774568 | 0.524371947 | 0.661845389 |
| cg17489750 | 8  | 1.21E-05    | 0.327863442 | 0.465298397 |
| cg20249252 | 12 | 0.022615068 | 0.12001825  | 0.257320488 |
| cg25149122 | 18 | 0.002619995 | 0.30114227  | 0.438234357 |
| cg02613809 | 10 | 0.001620224 | 0.569823473 | 0.706839858 |
| cg10852861 | 4  | 0.020435772 | 0.138363176 | 0.275376029 |
| cg11869862 | 15 | 0.011428718 | 0.264343949 | 0.401293544 |
| cg18017482 | 1  | 0.000200905 | 0.28431722  | 0.421089742 |
| cg11286742 | 3  | 0.010212531 | 0.531019166 | 0.667724262 |
| cg17074989 | 15 | 0.019751404 | 0.21846053  | 0.354740763 |
| cg19248958 | 10 | 0.015738947 | 0.516670042 | 0.652809417 |



|            |    |             |             |             |
|------------|----|-------------|-------------|-------------|
| cg14304674 | 9  | 0.006476546 | 0.387287595 | 0.523180497 |
| cg16278514 | 3  | 0.001902748 | 0.269213144 | 0.404614335 |
| cg08675565 | 4  | 3.20E-05    | 0.366570234 | 0.501868451 |
| cg15305352 | 6  | 0.013485176 | 0.174131642 | 0.309409677 |
| cg14210119 | 2  | 0.00416261  | 0.50485866  | 0.640098987 |
| cg17164513 | 19 | 0.017787644 | 0.270008476 | 0.405154356 |
| cg06002476 | 3  | 0.018643548 | 0.271957747 | 0.406920609 |
| cg17635080 | 12 | 0.008126764 | 0.332422716 | 0.467318566 |
| cg22375757 | 3  | 0.010112517 | 0.359129572 | 0.493555844 |
| cg04601957 | 2  | 0.011397263 | 0.365080583 | 0.499427705 |
| cg26853787 | 2  | 0.019989075 | 0.272841188 | 0.406955196 |
| cg09265016 | 12 | 0.000247762 | 0.505800952 | 0.63982245  |
| cg22107147 | 2  | 0.011558602 | 0.514806421 | 0.64867225  |
| cg27120405 | 2  | 9.38E-06    | 0.649520519 | 0.783222181 |
| cg08787698 | 2  | 0.041322676 | 0.347612819 | 0.481170098 |
| cg17855390 | 1  | 0.011450171 | 0.332394192 | 0.4658384   |
| cg09976157 | 6  | 0.032158683 | 0.286148426 | 0.419435958 |
| cg23202167 | 19 | 7.63E-05    | 0.283319107 | 0.416584235 |
| cg16681649 | 11 | 0.017752035 | 0.619037453 | 0.752259286 |
| cg00614617 | 17 | 3.07E-05    | 0.363063747 | 0.496244438 |
| cg13767779 | 17 | 0.005199138 | 0.396049658 | 0.529149646 |
| cg01269702 | 2  | 0.031942418 | 0.242830136 | 0.375929496 |
| cg04853995 | 12 | 0.018105648 | 0.344674797 | 0.477718535 |
| cg18384190 | 10 | 0.022617969 | 0.351138014 | 0.483974957 |
| cg17213713 | 7  | 0.004857875 | 0.550381213 | 0.683178804 |
| cg23499779 | 12 | 0.008286634 | 0.535924249 | 0.668599501 |
| cg04249642 | 10 | 0.020049088 | 0.46590655  | 0.598524695 |
| cg12050175 | 10 | 0.000548766 | 0.547126787 | 0.679672928 |
| cg05753629 | 1  | 0.032998427 | 0.382623462 | 0.515143642 |
| cg19412663 | 4  | 0.001134013 | 0.347890659 | 0.480407217 |
| cg26987928 | 15 | 0.001495184 | 0.551556418 | 0.683942685 |
| cg16311740 | 3  | 0.000864546 | 0.304725532 | 0.436701155 |
| cg10461261 | 15 | 0.001455242 | 0.574015501 | 0.705975837 |
| cg21507153 | 7  | 0.00016271  | 0.669470497 | 0.801223529 |
| cg26710983 | 16 | 0.035230119 | 0.325653053 | 0.457052817 |
| cg01962750 | 2  | 0.011812378 | 0.329418701 | 0.460631519 |
| cg05222995 | 12 | 0.000677447 | 0.158413799 | 0.289529974 |
| cg25033380 | 12 | 0.009577294 | 0.241534753 | 0.372638065 |
| cg26597838 | 10 | 0.033406242 | 0.189531692 | 0.320616559 |
| cg17010895 | 2  | 0.025232497 | 0.471693922 | 0.602693451 |
| cg27360992 | 22 | 0.04263191  | 0.224715442 | 0.355674107 |
| cg05261299 | 12 | 0.001174228 | 0.255789041 | 0.386203645 |
| cg17485988 | 7  | 0.020518884 | 0.273306415 | 0.403688482 |
| cg14226702 | 9  | 0.004176324 | 0.519369274 | 0.649747492 |
| cg11646762 | 5  | 0.009785482 | 0.427309664 | 0.55762507  |
| cg00018850 | 14 | 0.00801806  | 0.483417936 | 0.613727628 |

|            |    |             |             |             |
|------------|----|-------------|-------------|-------------|
| cg07967531 | 1  | 0.002876115 | 0.497623453 | 0.627814172 |
| cg21664281 | 3  | 0.003960623 | 0.686254377 | 0.816253815 |
| cg04920214 | 16 | 0.000627016 | 0.674083714 | 0.804049002 |
| cg27657363 | 22 | 0.022101596 | 0.288124542 | 0.417972671 |
| cg18749015 | 6  | 0.00024308  | 0.090317287 | 0.220042164 |
| cg21242508 | 22 | 0.001333438 | 0.607637302 | 0.737171724 |
| cg22036872 | 1  | 0.009171004 | 0.438451957 | 0.567626301 |
| cg27095222 | 11 | 0.027982234 | 0.559482602 | 0.688590519 |
| cg00432953 | 3  | 0.032758553 | 0.319167766 | 0.448216696 |
| cg17297696 | 11 | 0.020588976 | 0.616581455 | 0.745600751 |
| cg19738121 | 12 | 0.011623191 | 0.407973388 | 0.536925505 |
| cg13593562 | 9  | 0.001439995 | 0.369877257 | 0.498534557 |
| cg21170682 | 11 | 0.008679037 | 0.252958861 | 0.381584257 |
| cg21997746 | 6  | 0.001002977 | 0.45549812  | 0.583986036 |
| cg02274236 | 7  | 0.042114301 | 0.184890571 | 0.313351364 |
| cg03113254 | 4  | 0.01488726  | 0.25258772  | 0.380852234 |
| cg24983752 | 11 | 0.002881582 | 0.271094206 | 0.399034798 |
| cg15337521 | 5  | 0.016011862 | 0.511238363 | 0.639024559 |
| cg19859445 | 8  | 0.003094523 | 0.521422535 | 0.649179852 |
| cg17479898 | 1  | 0.042115337 | 0.439785097 | 0.567400149 |
| cg06761167 | 16 | 0.006013434 | 0.249661911 | 0.377276705 |
| cg05479109 | 16 | 0.000757331 | 0.592602743 | 0.720067815 |
| cg13796936 | 1  | 0.036604793 | 0.193411668 | 0.320864761 |
| cg04079215 | 1  | 0.002169448 | 0.528369999 | 0.655387694 |
| cg07230078 | 4  | 0.009888326 | 0.224381487 | 0.351344363 |
| cg06000330 | 7  | 0.000221568 | 0.318437258 | 0.445227103 |
| cg21393885 | 17 | 0.006596904 | 0.518824423 | 0.645534998 |
| cg22495968 | 2  | 0.048564693 | 0.578115581 | 0.704618769 |
| cg13493546 | 9  | 0.000164633 | 0.526977478 | 0.653397711 |
| cg04962865 | 8  | 0.034307428 | 0.147770528 | 0.273958577 |
| cg23279756 | 6  | 4.14E-05    | 0.203618904 | 0.329735607 |
| cg02064798 | 4  | 0.023671768 | 0.336213693 | 0.462322958 |
| cg22063654 | 8  | 0.000182362 | 0.152275957 | 0.278256629 |
| cg21351437 | 4  | 0.011899251 | 0.291956964 | 0.417829591 |
| cg23899450 | 2  | 0.012677507 | 0.385813676 | 0.511653457 |
| cg07188523 | 6  | 0.00034587  | 0.147858547 | 0.273616337 |
| cg05453411 | 16 | 0.005769223 | 0.557008519 | 0.682687352 |
| cg23610041 | 20 | 0.000928831 | 0.184378341 | 0.309956559 |
| cg05707211 | 8  | 0.0105324   | 0.448907596 | 0.574298895 |
| cg18869244 | 17 | 0.029843447 | 0.179826143 | 0.305215171 |
| cg13460850 | 3  | 0.007400477 | 0.202852425 | 0.328115373 |
| cg10985970 | 11 | 0.001130199 | 0.525484699 | 0.650568314 |
| cg06829686 | 1  | 0.000395355 | 0.375586797 | 0.50062233  |
| cg01231009 | 8  | 0.001367167 | 0.533498421 | 0.658512335 |
| cg02116283 | 2  | 0.031513406 | 0.5655402   | 0.690453555 |
| cg21188409 | 3  | 0.018644836 | 0.291788862 | 0.416671868 |

|            |    |             |             |             |
|------------|----|-------------|-------------|-------------|
| cg01471428 | 12 | 0.039606745 | 0.285278545 | 0.410014824 |
| cg14210817 | 13 | 0.003464831 | 0.221407479 | 0.345929751 |
| cg11724590 | 14 | 0.00406     | 0.381398771 | 0.50587177  |
| cg23220897 | 3  | 0.004180479 | 0.316501819 | 0.440951565 |
| cg13998223 | 9  | 0.014935579 | 0.273116822 | 0.397542841 |
| cg21392435 | 8  | 0.000247344 | 0.278442282 | 0.402818211 |
| cg14987787 | 12 | 0.004481925 | 0.193855296 | 0.317894572 |
| cg25351763 | 5  | 0.000109819 | 0.66852779  | 0.792482647 |
| cg12107466 | 10 | 0.02281975  | 0.468881196 | 0.592670269 |
| cg04586928 | 5  | 0.026203838 | 0.424170975 | 0.54791249  |
| cg08026493 | 8  | 0.013050434 | 0.337022608 | 0.460423125 |
| cg04234923 | 5  | 0.00619707  | 0.383686098 | 0.507084536 |
| cg26702098 | 8  | 0.022391023 | 0.371187418 | 0.49457633  |
| cg26893699 | 17 | 0.038312213 | 0.296502517 | 0.419805384 |
| cg04229930 | 2  | 0.000736065 | 0.181425936 | 0.304481668 |
| cg02467382 | 8  | 0.022464206 | 0.400891949 | 0.523792507 |
| cg17511968 | 2  | 0.001692837 | 0.462054007 | 0.584840388 |
| cg11524773 | 6  | 0.012986339 | 0.22975324  | 0.352457086 |
| cg08127108 | 2  | 0.045435171 | 0.300297382 | 0.422936578 |
| cg20597127 | 1  | 0.030679281 | 0.233404228 | 0.355809241 |
| cg06929583 | 10 | 0.023051461 | 0.251668971 | 0.374011316 |
| cg04135198 | 8  | 0.000195317 | 0.281496256 | 0.40365411  |
| cg13235761 | 1  | 0.002067588 | 0.13975643  | 0.261855961 |
| cg00432262 | 7  | 1.10E-05    | 0.502384634 | 0.624354258 |
| cg04141975 | 5  | 0.02028305  | 0.39243635  | 0.514398065 |
| cg05897122 | 4  | 0.019182134 | 0.534649723 | 0.656500036 |
| cg21386766 | 12 | 0.023942232 | 0.410123907 | 0.531942479 |
| cg09941601 | 16 | 0.03210859  | 0.234806653 | 0.35656807  |
| cg22138219 | 8  | 0.018685129 | 0.504516035 | 0.626082932 |
| cg12277789 | 10 | 0.021161123 | 0.285134027 | 0.406586903 |
| cg07133097 | 2  | 0.000248287 | 0.694754215 | 0.816071662 |
| cg17098979 | 2  | 0.043138161 | 0.328443907 | 0.449651453 |
| cg14651936 | 9  | 0.000125477 | 0.350544261 | 0.471693206 |
| cg15174906 | 6  | 0.000461539 | 0.254241585 | 0.37534004  |
| cg26373051 | 2  | 0.011432324 | 0.159412906 | 0.280487059 |
| cg27535538 | 7  | 0.002303651 | 0.42420117  | 0.545247394 |
| cg04229986 | 10 | 0.007683743 | 0.524563796 | 0.645568976 |
| cg20051875 | 12 | 0.000711928 | 0.382120995 | 0.503072787 |
| cg11701367 | 5  | 0.010139755 | 0.517668017 | 0.63854501  |
| cg16302916 | 14 | 0.00954094  | 0.557472244 | 0.678217964 |
| cg17630138 | 3  | 0.018125145 | 0.488610053 | 0.60921424  |
| cg08374552 | 5  | 0.016592835 | 0.364989308 | 0.485545662 |
| cg01289290 | 3  | 0.003191386 | 0.591032454 | 0.711499169 |
| cg01286665 | 5  | 0.002389976 | 0.371283198 | 0.49147942  |
| cg05565697 | 15 | 0.001661982 | 0.415553729 | 0.53550213  |
| cg21578397 | 3  | 0.013692044 | 0.482822186 | 0.602724929 |

|            |    |             |             |             |
|------------|----|-------------|-------------|-------------|
| cg26884359 | 17 | 0.020871144 | 0.170294567 | 0.290146562 |
| cg01550810 | 1  | 0.04418854  | 0.553060748 | 0.672815704 |
| cg25249728 | 2  | 0.019556653 | 0.146078253 | 0.265789967 |
| cg23096806 | 10 | 0.004996921 | 0.247800534 | 0.36745514  |
| cg14335159 | 9  | 0.013230475 | 0.449976719 | 0.569622441 |
| cg17476285 | 1  | 0.005471188 | 0.470612751 | 0.59021527  |
| cg19742687 | 11 | 0.043474776 | 0.318384601 | 0.437970018 |
| cg04293770 | 5  | 0.031952695 | 0.546132032 | 0.665714309 |
| cg11302988 | 13 | 0.002772877 | 0.588199512 | 0.707739831 |
| cg09501314 | 15 | 0.014674435 | 0.145314576 | 0.26482552  |
| cg07599713 | 6  | 0.006645607 | 0.504855224 | 0.624323958 |
| cg14460008 | 2  | 0.013040092 | 0.546462316 | 0.665853976 |
| cg06748060 | 4  | 0.000313121 | 0.626365051 | 0.745737817 |
| cg00256155 | 1  | 0.000184837 | 0.244022229 | 0.363346054 |
| cg01627475 | 2  | 0.009696819 | 0.410803854 | 0.529985132 |
| cg10632966 | 10 | 0.000726218 | 0.609083903 | 0.728105658 |
| cg11988253 | 2  | 0.009561915 | 0.281993189 | 0.400942418 |
| cg26621770 | 12 | 0.005139071 | 0.196569443 | 0.315380732 |
| cg14588003 | 15 | 0.01193442  | 0.428376187 | 0.547161474 |
| cg11794956 | 5  | 0.013606725 | 0.294389644 | 0.413131039 |
| cg20635389 | 2  | 0.008976304 | 0.344648326 | 0.463365779 |
| cg19595295 | 17 | 0.019658199 | 0.222101848 | 0.340502569 |
| cg06103243 | 3  | 0.008857328 | 0.405427536 | 0.523732031 |
| cg07920381 | 12 | 0.029428352 | 0.350668629 | 0.468931863 |
| cg10476950 | 7  | 0.018987936 | 0.576675415 | 0.694835059 |
| cg01128025 | 4  | 0.045357901 | 0.32460228  | 0.442601293 |
| cg16698845 | 7  | 0.0015091   | 0.657676821 | 0.775641173 |
| cg04181032 | 4  | 0.007147513 | 0.461095226 | 0.579051336 |
| cg19699170 | 2  | 0.004730381 | 0.30031971  | 0.418044155 |
| cg02772711 | 12 | 0.000217512 | 0.610097228 | 0.727809532 |
| cg09077443 | 11 | 0.013845423 | 0.314433834 | 0.432116497 |
| cg01008680 | 22 | 0.005549499 | 0.398075813 | 0.51575079  |
| cg12369091 | 12 | 0.009987298 | 0.36114143  | 0.478698983 |
| cg02244233 | 10 | 0.009176459 | 0.232949851 | 0.350462196 |
| cg21171610 | 4  | 0.01088863  | 0.429154578 | 0.546544047 |
| cg07126126 | 16 | 0.042526218 | 0.550635832 | 0.66800574  |
| cg21884122 | 14 | 0.00033013  | 0.558746128 | 0.676088407 |
| cg18952546 | 6  | 0.00111353  | 0.460389603 | 0.577487258 |
| cg01116425 | 2  | 0.01394443  | 0.299700464 | 0.416714608 |
| cg06821999 | 14 | 0.015402786 | 0.154298222 | 0.27130143  |
| cg11996860 | 8  | 0.002452411 | 0.417766824 | 0.534696211 |
| cg27508055 | 2  | 0.006267491 | 0.405285223 | 0.52215251  |
| cg11692124 | 17 | 0.002475708 | 0.150174074 | 0.266999881 |
| cg02272429 | 15 | 3.18E-05    | 0.668106233 | 0.784929257 |
| cg13376438 | 7  | 0.001925983 | 0.62044712  | 0.737200452 |
| cg04607671 | 16 | 0.00346502  | 0.398748287 | 0.515358297 |

|            |    |             |             |             |
|------------|----|-------------|-------------|-------------|
| cg09050372 | 2  | 0.004091327 | 0.504433472 | 0.620950482 |
| cg27511461 | 10 | 0.026987223 | 0.472687035 | 0.588972626 |
| cg23393800 | 15 | 0.001417305 | 0.638736749 | 0.755006932 |
| cg01595262 | 12 | 0.000168795 | 0.617059409 | 0.733308281 |
| cg20824201 | 2  | 0.036279715 | 0.319386077 | 0.435564895 |
| cg04615460 | 12 | 0.000981512 | 0.258427224 | 0.374521597 |
| cg23922804 | 12 | 0.001079313 | 0.507486406 | 0.623562761 |
| cg26608486 | 16 | 0.00067076  | 0.647228332 | 0.763293377 |
| cg19735151 | 10 | 0.027219196 | 0.418422689 | 0.534477943 |
| cg01092108 | 5  | 0.001717771 | 0.618883132 | 0.734849846 |
| cg14434755 | 12 | 0.002721527 | 0.187377367 | 0.303283324 |
| cg08498747 | 17 | 0.001499053 | 0.329940948 | 0.44580227  |
| cg08278108 | 17 | 1.16E-05    | 0.193104605 | 0.308890088 |
| cg26107642 | 5  | 0.048830078 | 0.233278765 | 0.349063595 |
| cg14434601 | 7  | 0.017204335 | 0.534604072 | 0.650311113 |
| cg01184975 | 12 | 0.014218123 | 0.080090092 | 0.195792979 |
| cg25988321 | 14 | 0.013477394 | 0.167425225 | 0.283111873 |
| cg14145896 | 14 | 0.000492104 | 0.530274242 | 0.645909276 |
| cg12163955 | 15 | 0.001372606 | 0.456298456 | 0.57192633  |
| cg20926679 | 4  | 0.021594543 | 0.375731086 | 0.491226546 |
| cg20784391 | 17 | 0.046440886 | 0.377557633 | 0.492907115 |
| cg00454592 | 2  | 0.008511291 | 0.557649076 | 0.67297085  |
| cg11268280 | 8  | 9.04E-06    | 0.138713199 | 0.253977808 |
| cg19086497 | 11 | 0.019383965 | 0.499753556 | 0.614964713 |
| cg03973379 | 7  | 0.03073955  | 0.310102541 | 0.425274813 |
| cg04754683 | 8  | 0.048348455 | 0.476324431 | 0.591459692 |
| cg16927416 | 8  | 0.000390528 | 0.317828828 | 0.432845408 |
| cg05348366 | 1  | 0.022922863 | 0.495510636 | 0.610451674 |
| cg19996420 | 13 | 0.036170359 | 0.371057709 | 0.485998576 |
| cg17404640 | 6  | 0.035474127 | 0.400818108 | 0.515721264 |
| cg00615941 | 3  | 0.035738232 | 0.399752399 | 0.514520924 |
| cg03130530 | 2  | 0.013394365 | 0.35665978  | 0.471415047 |
| cg17870997 | 2  | 0.020968545 | 0.323001153 | 0.437712843 |
| cg15171155 | 3  | 0.018887822 | 0.50933964  | 0.623970353 |
| cg11915444 | 2  | 0.007816464 | 0.598565237 | 0.713186516 |
| cg24384120 | 10 | 0.035053651 | 0.144978624 | 0.25959018  |
| cg06154005 | 6  | 0.037850169 | 0.402344634 | 0.516867254 |
| cg09696115 | 15 | 0.033604111 | 0.378586492 | 0.493089231 |
| cg26866349 | 16 | 0.003741374 | 0.644909608 | 0.7594078   |
| cg24352299 | 13 | 0.018603039 | 0.559357828 | 0.673848704 |
| cg19747745 | 21 | 0.000894923 | 0.364526992 | 0.478999139 |
| cg19482885 | 18 | 0.020523329 | 0.641774656 | 0.75624402  |
| cg11254532 | 1  | 0.003371215 | 0.265534193 | 0.380003183 |
| cg20562447 | 11 | 0.000573486 | 0.114991198 | 0.229443549 |
| cg07765595 | 16 | 0.011840482 | 0.336833595 | 0.451205974 |
| cg25051510 | 12 | 0.008403189 | 0.342229421 | 0.456530133 |

|            |    |             |             |             |
|------------|----|-------------|-------------|-------------|
| cg06443678 | 17 | 0.011510744 | 0.48039949  | 0.594630684 |
| cg07970325 | 6  | 4.77E-05    | 0.481630621 | 0.595835858 |
| cg12248807 | 6  | 0.00772057  | 0.55637876  | 0.670540506 |
| cg01227246 | 2  | 0.001494811 | 0.6384091   | 0.752452882 |
| cg09148630 | 6  | 0.025890944 | 0.180506231 | 0.294524934 |
| cg03221837 | 16 | 0.031952695 | 0.292112879 | 0.406127009 |
| cg10891959 | 13 | 0.018580763 | 0.413467143 | 0.52727921  |
| cg12389397 | 1  | 0.021570223 | 0.393138087 | 0.506946743 |
| cg27065717 | 16 | 0.000809526 | 0.619262454 | 0.732907888 |
| cg21457856 | 3  | 0.008134663 | 0.566088246 | 0.679622879 |
| cg12115800 | 3  | 0.000519979 | 0.606950734 | 0.720481288 |
| cg09320079 | 16 | 0.037653444 | 0.165518662 | 0.27896608  |
| cg26888463 | 16 | 0.001679886 | 0.208085161 | 0.321406107 |
| cg03909983 | 8  | 5.55E-05    | 0.328645558 | 0.441907244 |
| cg24202221 | 2  | 0.039193071 | 0.477077    | 0.590310907 |
| cg05801374 | 1  | 0.003913259 | 0.334659851 | 0.447847263 |
| cg20321270 | 4  | 0.00480381  | 0.596665848 | 0.709736539 |
| cg25556051 | 4  | 0.042689979 | 0.397065297 | 0.510016083 |
| cg20202760 | 8  | 0.01251511  | 0.296394154 | 0.409342684 |
| cg00594191 | 10 | 0.005915442 | 0.145636205 | 0.258578455 |
| cg13625388 | 13 | 0.01723909  | 0.35957109  | 0.472493289 |
| cg18011188 | 2  | 0.048113387 | 0.415138176 | 0.528018844 |
| cg10020890 | 16 | 0.004613918 | 0.39808535  | 0.510934961 |
| cg17877600 | 1  | 0.00028039  | 0.48201052  | 0.594815173 |
| cg15642380 | 1  | 0.004385253 | 0.58898201  | 0.701695111 |
| cg06034711 | 8  | 0.000257636 | 0.535164891 | 0.647727236 |
| cg02084467 | 17 | 0.026799648 | 0.145163913 | 0.257673578 |
| cg02433979 | 7  | 0.025190479 | 0.221832714 | 0.334286961 |
| cg06192592 | 6  | 0.011347374 | 0.196647349 | 0.309024485 |
| cg17657459 | 5  | 0.001672028 | 0.262350282 | 0.374644132 |
| cg09011316 | 1  | 0.002223488 | 0.380919926 | 0.493090031 |
| cg09334977 | 6  | 0.005598305 | 0.451548686 | 0.563690062 |
| cg04017512 | 10 | 0.000995156 | 0.574380886 | 0.686488323 |
| cg16322269 | 8  | 0.007810357 | 0.426691778 | 0.538741587 |
| cg08743313 | 4  | 0.014302124 | 0.411010008 | 0.523025187 |
| cg03773183 | 17 | 0.036601551 | 0.624923379 | 0.736872114 |
| cg05033560 | 5  | 0.003689656 | 0.530616692 | 0.642524118 |
| cg23424407 | 12 | 0.002459665 | 0.159767638 | 0.271435158 |
| cg07579884 | 14 | 0.039510799 | 0.319332274 | 0.430947163 |
| cg13051263 | 3  | 0.026490792 | 0.527095719 | 0.638677122 |
| cg09695851 | 17 | 0.004192769 | 0.302473329 | 0.414004361 |
| cg20957370 | 5  | 0.025650419 | 0.2976761   | 0.409115965 |
| cg03736795 | 4  | 0.033248296 | 0.17259326  | 0.283839584 |
| cg11170998 | 4  | 0.018659326 | 0.534350503 | 0.645596496 |
| cg24056365 | 1  | 0.023446341 | 0.564102166 | 0.675237611 |
| cg07554408 | 14 | 0.043231788 | 0.175327935 | 0.286425847 |

|            |    |             |             |             |
|------------|----|-------------|-------------|-------------|
| cg15757019 | 4  | 0.019320874 | 0.382255117 | 0.493318582 |
| cg12772314 | 18 | 0.015848259 | 0.268889589 | 0.379876244 |
| cg03076855 | 6  | 0.012164625 | 0.199738346 | 0.310701301 |
| cg03581797 | 14 | 0.008124109 | 0.22140404  | 0.332303963 |
| cg02204521 | 2  | 0.026284764 | 0.115680259 | 0.226484373 |
| cg03073691 | 13 | 0.005996811 | 0.501501483 | 0.612251635 |
| cg10174683 | 16 | 0.028688988 | 0.343342938 | 0.454040562 |
| cg25943481 | 15 | 0.047645073 | 0.355216841 | 0.465841561 |
| cg14994947 | 1  | 0.001736157 | 0.595071779 | 0.705677828 |
| cg18879198 | 2  | 0.009290674 | 0.364011723 | 0.474597649 |
| cg09115225 | 13 | 0.007718181 | 0.563597676 | 0.674134426 |
| cg15806569 | 2  | 0.015402786 | 0.551647743 | 0.662137706 |
| cg23856536 | 7  | 0.000939507 | 0.086825395 | 0.197279513 |
| cg07211476 | 18 | 0.027767181 | 0.659506392 | 0.769945769 |
| cg05437476 | 16 | 0.007547871 | 0.406802754 | 0.517233398 |
| cg12354056 | 3  | 0.028183081 | 0.389408074 | 0.499661601 |
| cg04348643 | 3  | 0.003143153 | 0.424627906 | 0.534856591 |
| cg05599759 | 20 | 0.024930969 | 0.243576574 | 0.353744566 |
| cg14521077 | 3  | 0.012300301 | 0.596222861 | 0.706329755 |
| cg00277714 | 13 | 0.000853957 | 0.458086981 | 0.56819157  |
| cg11584284 | 6  | 0.00401677  | 0.594819707 | 0.704797323 |
| cg05590921 | 11 | 0.041946993 | 0.364807514 | 0.474648313 |
| cg12853656 | 7  | 0.00346667  | 0.503050778 | 0.612885863 |
| cg02299497 | 14 | 0.002076339 | 0.579757491 | 0.689535743 |
| cg18169505 | 4  | 0.043181192 | 0.304539747 | 0.414313504 |
| cg05612654 | 6  | 0.000893003 | 0.629783206 | 0.739552056 |
| cg11532433 | 2  | 0.017107867 | 0.331829697 | 0.441512451 |
| cg18097872 | 2  | 0.002772877 | 0.315766804 | 0.425408497 |
| cg14678654 | 20 | 0.002414966 | 0.245865805 | 0.355456983 |
| cg03511513 | 12 | 0.016493892 | 0.608034128 | 0.717597241 |
| cg11423909 | 3  | 0.00174192  | 0.616157039 | 0.72568544  |
| cg05453924 | 13 | 0.044797926 | 0.423744451 | 0.533247303 |
| cg10228981 | 16 | 0.002033219 | 0.581663716 | 0.690996465 |
| cg18780021 | 17 | 0.013537662 | 0.379946053 | 0.489114086 |
| cg22964758 | 12 | 0.01843103  | 0.5440483   | 0.653176353 |
| cg00299396 | 11 | 5.50E-06    | 0.621971183 | 0.731020132 |
| cg23006227 | 4  | 0.028314977 | 0.375881131 | 0.484860382 |
| cg00512459 | 15 | 0.023378987 | 0.430317887 | 0.539239571 |
| cg18985738 | 11 | 0.027498322 | 0.138572888 | 0.247342538 |
| cg16063018 | 12 | 0.049187088 | 0.344463121 | 0.453190651 |
| cg07870914 | 1  | 0.04798691  | 0.423857242 | 0.532533414 |
| cg22959827 | 5  | 0.020513196 | 0.432126952 | 0.540650215 |
| cg02203714 | 16 | 0.004466345 | 0.427370045 | 0.535826957 |
| cg00269725 | 6  | 0.003217337 | 0.710454478 | 0.818891058 |
| cg21924472 | 4  | 0.001869951 | 0.42211677  | 0.530509871 |
| cg01953615 | 16 | 0.000194243 | 0.643697603 | 0.752071188 |

|            |    |             |             |             |
|------------|----|-------------|-------------|-------------|
| cg24690715 | 20 | 0.049464849 | 0.325098446 | 0.433434767 |
| cg06388363 | 6  | 0.001571045 | 0.385370709 | 0.493669071 |
| cg26504440 | 12 | 0.000489959 | 0.293029779 | 0.401288361 |
| cg01471264 | 2  | 0.0192307   | 0.253178911 | 0.361340197 |
| cg02627405 | 5  | 0.000275472 | 0.642908423 | 0.75102955  |
| cg20778022 | 7  | 0.025093768 | 0.546200476 | 0.654304137 |
| cg10484693 | 10 | 0.049063229 | 0.185150502 | 0.293251426 |
| cg06139794 | 10 | 0.001373359 | 0.52764419  | 0.63570793  |
| cg02330719 | 17 | 0.014345754 | 0.654989308 | 0.763020145 |
| cg21897970 | 17 | 0.024918847 | 0.314663402 | 0.422652531 |
| cg05479618 | 11 | 0.04163769  | 0.462646939 | 0.570558158 |
| cg10626792 | 11 | 0.028090831 | 0.394579374 | 0.50242166  |
| cg09187505 | 6  | 0.000268047 | 0.199624827 | 0.307407108 |
| cg15514393 | 10 | 0.019700266 | 0.52037238  | 0.628067037 |
| cg19014214 | 11 | 0.008162847 | 0.244180286 | 0.351772484 |
| cg14156498 | 9  | 0.029810359 | 0.290255449 | 0.397840227 |
| cg07504763 | 1  | 0.006135737 | 0.352651798 | 0.460215505 |
| cg06910580 | 12 | 0.03690421  | 0.316961342 | 0.424517552 |
| cg20463533 | 10 | 0.043780121 | 0.519241931 | 0.626764645 |
| cg06530563 | 12 | 0.022223863 | 0.152858207 | 0.26033586  |
| cg17729072 | 6  | 0.018756486 | 0.144217474 | 0.251615926 |
| cg01061714 | 5  | 0.030337974 | 0.358506765 | 0.465801903 |
| cg04017102 | 5  | 3.01E-07    | 0.632695662 | 0.739944657 |
| cg23819144 | 10 | 0.01918528  | 0.561561957 | 0.668792283 |
| cg14461273 | 14 | 0.00045972  | 0.690583198 | 0.797801123 |
| cg23591463 | 12 | 0.028185853 | 0.09893554  | 0.206151511 |
| cg01044025 | 3  | 0.003927599 | 0.291746724 | 0.398927571 |
| cg11073382 | 4  | 0.002870444 | 0.388288205 | 0.495455044 |
| cg03677126 | 5  | 0.039655428 | 0.36414841  | 0.471284505 |
| cg04852323 | 16 | 0.026419004 | 0.426356286 | 0.533460945 |
| cg21123519 | 14 | 0.001868748 | 0.625871565 | 0.732919707 |
| cg08478672 | 8  | 0.029774141 | 0.342437973 | 0.449442969 |
| cg07858848 | 2  | 0.036299795 | 0.539008092 | 0.645913384 |
| cg14244013 | 17 | 0.000135111 | 0.160332991 | 0.267167883 |
| cg25402979 | 12 | 0.007585428 | 0.593514217 | 0.700234212 |
| cg10529555 | 1  | 0.000170116 | 0.182054835 | 0.288737019 |
| cg11603201 | 12 | 0.004323729 | 0.681879195 | 0.78846587  |
| cg16329589 | 4  | 0.035773184 | 0.259313909 | 0.365882254 |
| cg02516703 | 5  | 0.04659576  | 0.369977043 | 0.476280928 |
| cg25138327 | 2  | 0.037728941 | 0.44903245  | 0.555278836 |
| cg21662240 | 8  | 0.017641816 | 0.423299527 | 0.529545717 |
| cg25526960 | 10 | 0.032569229 | 0.249406434 | 0.355624474 |
| cg26921881 | 17 | 0.00104487  | 0.348998599 | 0.455172954 |
| cg17017189 | 6  | 1.94E-05    | 0.129987331 | 0.235871929 |
| cg02596508 | 16 | 0.013061959 | 0.48925135  | 0.595127844 |
| cg10492240 | 4  | 0.015903617 | 0.210208134 | 0.316062582 |



|            |    |             |             |             |
|------------|----|-------------|-------------|-------------|
| cg20481247 | 10 | 0.036083107 | 0.519491669 | 0.62519913  |
| cg02383285 | 6  | 0.030333582 | 0.211503785 | 0.317183592 |
| cg19502359 | 11 | 0.000626319 | 0.151203231 | 0.256800444 |
| cg11064034 | 12 | 0.042090597 | 0.172049117 | 0.277586764 |
| cg04610187 | 17 | 0.012290369 | 0.580840455 | 0.686367241 |
| cg01413548 | 6  | 0.048750894 | 0.32172553  | 0.42706319  |
| cg17153133 | 6  | 0.01963187  | 0.57846605  | 0.683724827 |
| cg12043145 | 14 | 0.010198095 | 0.332353029 | 0.43758615  |
| cg13972366 | 7  | 0.007091199 | 0.268491911 | 0.373570239 |
| cg09263516 | 12 | 0.002155124 | 0.377656886 | 0.482724543 |
| cg21821684 | 15 | 0.023299373 | 0.327785544 | 0.432809355 |
| cg22372285 | 11 | 0.001787749 | 0.62789622  | 0.732894509 |
| cg18913924 | 7  | 0.00650558  | 0.424099276 | 0.529033894 |
| cg22740634 | 2  | 0.000631705 | 0.495105142 | 0.599980435 |
| cg08155625 | 21 | 0.008636785 | 0.505363027 | 0.610075425 |
| cg05482603 | 10 | 0.03083473  | 0.596646495 | 0.701326279 |
| cg24527636 | 1  | 0.042832477 | 0.198877169 | 0.303508453 |
| cg27387573 | 16 | 0.000452155 | 0.550790625 | 0.655399749 |
| cg00834923 | 16 | 0.003462783 | 0.20801481  | 0.312590364 |
| cg20668221 | 2  | 0.000880511 | 0.189158717 | 0.293671191 |
| cg10406759 | 17 | 0.030569079 | 0.567269246 | 0.671771438 |
| cg09313140 | 12 | 0.001351625 | 0.428196909 | 0.532695419 |
| cg19265919 | 7  | 0.003824894 | 0.707434992 | 0.81185251  |
| cg00908813 | 3  | 0.015259556 | 0.548226087 | 0.652597267 |
| cg16355771 | 3  | 0.007950948 | 0.492773431 | 0.597118746 |
| cg15516052 | 11 | 0.037381178 | 0.304678504 | 0.40898122  |
| cg09430518 | 8  | 0.028550465 | 0.397296744 | 0.501581652 |
| cg08452095 | 3  | 0.013987191 | 0.487017367 | 0.591262005 |
| cg14313315 | 12 | 0.024763637 | 0.213951334 | 0.318178825 |
| cg00423598 | 7  | 0.049667672 | 0.329264065 | 0.43346171  |
| cg14706317 | 5  | 0.003399024 | 0.398315198 | 0.502511479 |
| cg24794669 | 10 | 0.008627592 | 0.419058421 | 0.523218442 |
| cg19513492 | 12 | 0.012582026 | 0.232343003 | 0.336443657 |
| cg16598508 | 16 | 0.012729144 | 0.211517613 | 0.315618019 |
| cg25800753 | 10 | 0.004687258 | 0.510177969 | 0.614222627 |
| cg16144883 | 17 | 0.000155071 | 0.150760886 | 0.254799855 |
| cg23385248 | 15 | 0.038340938 | 0.420232368 | 0.524236881 |
| cg20430631 | 11 | 0.02371878  | 0.314251646 | 0.41824972  |
| cg21686386 | 1  | 0.005128879 | 0.518902651 | 0.622891011 |
| cg10546817 | 14 | 0.016403302 | 0.15790246  | 0.261819564 |
| cg21430752 | 17 | 0.010916727 | 0.559692285 | 0.663538768 |
| cg13604150 | 21 | 0.034299463 | 0.642374424 | 0.746203793 |
| cg22919538 | 3  | 0.017422507 | 0.549649067 | 0.653471829 |
| cg16075940 | 6  | 0.000618311 | 0.629506575 | 0.733071395 |
| cg02744699 | 17 | 0.012121576 | 0.675544574 | 0.779105199 |
| cg15956558 | 11 | 0.043223379 | 0.647394512 | 0.750766715 |

|            |    |             |             |             |
|------------|----|-------------|-------------|-------------|
| cg10218510 | 16 | 0.019563152 | 0.404513525 | 0.507879235 |
| cg17177599 | 2  | 0.024987608 | 0.565975335 | 0.669317951 |
| cg03005191 | 11 | 0.006328613 | 0.485068436 | 0.588396796 |
| cg00360761 | 2  | 7.02E-05    | 0.315001143 | 0.418275672 |
| cg02335251 | 2  | 0.018452476 | 0.193467537 | 0.296739437 |
| cg24211006 | 20 | 0.002161173 | 0.281030758 | 0.384278379 |
| cg05475627 | 6  | 0.017443274 | 0.546537489 | 0.649685018 |
| cg09151131 | 17 | 0.000249696 | 0.159536493 | 0.26266874  |
| cg08490246 | 4  | 0.019500176 | 0.419503064 | 0.522538601 |
| cg01433527 | 7  | 0.041642871 | 0.374204065 | 0.477184404 |
| cg11433866 | 12 | 0.006440357 | 0.200425177 | 0.30326933  |
| cg19290938 | 11 | 0.020047599 | 0.365518286 | 0.468283779 |
| cg11197630 | 5  | 0.048215267 | 0.24540529  | 0.34814385  |
| cg07347205 | 16 | 0.008179353 | 0.20199722  | 0.304658179 |
| cg23226249 | 1  | 0.038270787 | 0.258033481 | 0.360650693 |
| cg17305672 | 8  | 0.002840857 | 0.606353383 | 0.708953819 |
| cg11813265 | 14 | 0.014355264 | 0.164326591 | 0.266924016 |
| cg23606162 | 1  | 0.013711414 | 0.536454137 | 0.639025555 |
| cg05748238 | 16 | 0.011876608 | 0.414174783 | 0.516744467 |
| cg22112075 | 2  | 0.000581289 | 0.220893221 | 0.32328001  |
| cg19298400 | 17 | 0.048111291 | 0.381181927 | 0.483487009 |
| cg14886850 | 14 | 0.020724117 | 0.228705111 | 0.330973353 |
| cg23218354 | 1  | 0.000139674 | 0.307341643 | 0.409581392 |
| cg01951879 | 16 | 0.000343747 | 0.27918016  | 0.381167195 |
| cg17833265 | 17 | 0.00034587  | 0.235352538 | 0.337250667 |
| cg20436458 | 2  | 0.010797541 | 0.505846946 | 0.607670313 |
| cg14073497 | 11 | 0.000448976 | 0.110251223 | 0.212047142 |
| cg08688907 | 5  | 0.01120718  | 0.57655604  | 0.678190373 |
| cg08780680 | 13 | 0.000777078 | 0.630853488 | 0.73228033  |
| cg05081908 | 4  | 0.005360925 | 0.239393007 | 0.340696985 |
| cg04609694 | 6  | 0.049518048 | 0.236478226 | 0.337733904 |
| cg19998332 | 6  | 0.022781905 | 0.635737814 | 0.736915117 |
| cg19102120 | 5  | 0.020109534 | 0.652060686 | 0.753168912 |
| cg13537774 | 9  | 0.01746835  | 0.566154835 | 0.667230714 |
| cg19674851 | 2  | 0.010846928 | 0.625333942 | 0.726333715 |
| cg09744374 | 5  | 0.023002022 | 0.527239864 | 0.62821922  |
| cg18122493 | 1  | 9.93E-05    | 0.517741165 | 0.61871971  |
| cg08326300 | 10 | 0.046036823 | 0.148817288 | 0.249767543 |
| cg14202791 | 9  | 0.01471214  | 0.573595684 | 0.674484597 |
| cg03860530 | 2  | 0.000406936 | 0.481005275 | 0.581866517 |
| cg08461760 | 7  | 0.019299614 | 0.478296017 | 0.579144    |
| cg13207606 | 6  | 0.002776511 | 0.648516132 | 0.749340026 |
| cg08317243 | 16 | 0.000131759 | 0.615006109 | 0.715742387 |
| cg20063095 | 2  | 0.020143821 | 0.285959422 | 0.386658204 |
| cg24032056 | 12 | 0.003473769 | 0.534072116 | 0.634636264 |
| cg16685313 | 1  | 0.045579379 | 0.206022893 | 0.306566713 |

|            |    |             |             |             |
|------------|----|-------------|-------------|-------------|
| cg16237297 | 14 | 0.00271586  | 0.736131149 | 0.836638579 |
| cg21742975 | 15 | 0.038511227 | 0.140682712 | 0.241188285 |
| cg03810376 | 1  | 0.030543463 | 0.140876537 | 0.241318009 |
| cg11843673 | 2  | 0.022300174 | 0.570154463 | 0.670508898 |
| cg24800630 | 6  | 1.76E-05    | 0.69379444  | 0.793924627 |
| cg09885505 | 16 | 0.004123063 | 0.173398188 | 0.27352611  |
| cg17111166 | 11 | 0.000784518 | 0.36488688  | 0.464979701 |
| cg15947910 | 4  | 0.000956971 | 0.672986302 | 0.773062667 |

## Hypomethylated in Osteo

| Delta.Beta | Probe      | Gene        | CHR | adj.P-value |
|------------|------------|-------------|-----|-------------|
| -0.1445462 | cg16981346 | AARSD1;AAR  | 17  | 0.000382786 |
| -0.1194807 | cg04105716 | AATK        | 17  | 0.010216949 |
| -0.113312  | cg22081096 | ABCA6;ABCA  | 17  | 0.000153014 |
| -0.138377  | cg09648454 | ABCC12      | 16  | 2.39E-06    |
| -0.1184854 | cg07861968 | ABCC12;ABC  | 16  | 0.000247688 |
| -0.1552873 | cg13617376 | ABCC2       | 10  | 0.001347896 |
| -0.1240559 | cg25928474 | ABCC3;ABCC  | 17  | 0.001242878 |
| -0.1252736 | cg11237362 | ABCD3;ABCD  | 1   | 0.000247778 |
| -0.133075  | cg17574812 | ABHD6       | 3   | 0.018097917 |
| -0.1216324 | cg23196919 | ABHD6       | 3   | 0.00230369  |
| -0.1067329 | cg17941109 | ABHD8       | 19  | 0.000106067 |
| -0.1039831 | cg03471346 | ABL2;ABL2;A | 1   | 0.009704225 |
| -0.1029173 | cg01658815 | ABLIM1;ABLI | 10  | 0.000184837 |
| -0.1560956 | cg06848487 | ABLIM1;ABLI | 10  | 9.16E-05    |
| -0.1128319 | cg17056676 | ABLIM1;ABLI | 10  | 0.000137226 |
| -0.1360897 | cg19676285 | ABLIM2;ABLI | 4   | 0.000320999 |
| -0.1045825 | cg08837344 | ABRA        | 8   | 3.08E-05    |
| -0.1190392 | cg23302998 | ACCN1       | 17  | 0.004182832 |
| -0.1521152 | cg06956006 | ACLY;ACLY   | 17  | 0.022509615 |
| -0.1285184 | cg09249800 | ACOT7;ACOT  | 1   | 7.14E-06    |
| -0.1804021 | cg23230478 | ACOT7;ACOT  | 1   | 0.009577156 |
| -0.1236818 | cg11699125 | ACOT7;ACOT  | 1   | 6.97E-06    |
| -0.1775708 | cg24187645 | ACPL2;ACPL2 | 3   | 0.000109491 |
| -0.1030565 | cg14685946 | ACSL3;ACSL3 | 2   | 3.01E-07    |
| -0.1087205 | cg08734527 | ACTL8       | 1   | 0.003592231 |
| -0.134006  | cg13777668 | ACTN1;ACTN  | 14  | 7.81E-05    |
| -0.1055928 | cg06177278 | ACTN2       | 1   | 0.004590343 |
| -0.1472348 | cg26831416 | ACTN4       | 19  | 0.027017742 |
| -0.1068946 | cg13287763 | ACVR1;ACVR  | 2   | 0.000961229 |
| -0.1067029 | cg06001734 | ACYP2       | 2   | 0.004313925 |
| -0.1552701 | cg00952789 | ADAMTS1     | 21  | 0.00252796  |
| -0.1079797 | cg02827007 | ADAMTS10    | 19  | 0.001870636 |
| -0.1502802 | cg27015773 | ADAMTS10    | 19  | 0.00078909  |
| -0.1399307 | cg09918751 | ADAMTS17    | 15  | 0.001235342 |
| -0.1294046 | cg25357666 | ADAMTS17    | 15  | 0.000145062 |
| -0.1874233 | cg09046370 | ADAMTS2;AI  | 5   | 0.001055595 |
| -0.1216573 | cg00646084 | ADAMTS5     | 21  | 0.013036335 |
| -0.1095037 | cg05529278 | ADAMTS5     | 21  | 3.09E-06    |
| -0.1432851 | cg14740657 | ADAMTS5     | 21  | 0.003056913 |

|            |            |              |    |             |
|------------|------------|--------------|----|-------------|
| -0.12993   | cg03294207 | ADAMTS5      | 21 | 0.000907611 |
| -0.122669  | cg21033632 | ADAMTS6      | 5  | 0.006573215 |
| -0.1035131 | cg14502847 | ADAMTSL1;A   | 9  | 9.39E-05    |
| -0.125243  | cg22731190 | ADAMTSL2;A   | 9  | 0.024515185 |
| -0.1274403 | cg13687274 | ADAP1        | 7  | 0.039911715 |
| -0.1184768 | cg04012681 | ADARB2       | 10 | 0.012050744 |
| -0.1120971 | cg25379549 | ADARB2       | 10 | 0.000455759 |
| -0.1089341 | cg01918604 | ADORA3       | 1  | 0.004613958 |
| -0.1008493 | cg07572251 | ADRA1A;ADF   | 8  | 0.000257388 |
| -0.1285837 | cg23328194 | ADRA1A;ADF   | 8  | 0.000209255 |
| -0.1061265 | cg02158392 | AFAP1L2;AFAP | 10 | 3.27E-05    |
| -0.1534474 | cg17593384 | AFF1;AFF1    | 4  | 0.012115137 |
| -0.1138916 | cg21368566 | AGAP1;AGAP   | 2  | 0.000830212 |
| -0.1233572 | cg20975733 | AGBL1        | 15 | 0.006011887 |
| -0.1111806 | cg14953379 | AGK          | 7  | 0.036194651 |
| -0.1520474 | cg12483930 | AGRN         | 1  | 0.001564324 |
| -0.1141048 | cg13663303 | AGXT2        | 5  | 0.004073948 |
| -0.1383289 | cg09513758 | AHCYL1       | 1  | 0.017457761 |
| -0.1052275 | cg15797527 | AHI1;AHI1;AI | 6  | 0.000793648 |
| -0.1218636 | cg11138227 | AHNAK2       | 14 | 0.009111783 |
| -0.1238595 | cg01513078 | AHNAK2       | 14 | 0.000117501 |
| -0.1235203 | cg06799735 | AHNAK2       | 14 | 3.87E-05    |
| -0.1003584 | cg00691586 | AKAP13;AKA   | 15 | 0.001321098 |
| -0.1797119 | cg03884543 | AKNAD1       | 1  | 0.008879517 |
| -0.129609  | cg00863716 | AKR1C2;AKR   | 10 | 0.002214513 |
| -0.1084835 | cg00784105 | AKR7A2       | 1  | 0.001120516 |
| -0.1031431 | cg06400255 | ALDOA        | 16 | 0.020940341 |
| -0.1395403 | cg13306478 | ALOX5AP      | 13 | 0.000598826 |
| -0.1388482 | cg22129111 | ALOXE3;ALOX  | 17 | 0.000171491 |
| -0.1143904 | cg16413687 | ALX1         | 12 | 0.002787491 |
| -0.1011541 | cg03781931 | ALX1         | 12 | 0.038006786 |
| -0.1420129 | cg06809252 | ALX3         | 1  | 0.010110134 |
| -0.1372285 | cg07736627 | ALX4         | 11 | 1.05E-07    |
| -0.1070688 | cg10063575 | AMHR2;AMH    | 12 | 0.017358392 |
| -0.1352247 | cg14655905 | AMPD3;AMP    | 11 | 5.67E-06    |
| -0.1255773 | cg21823502 | ANAPC11;AN   | 17 | 0.00297012  |
| -0.1468707 | cg21193744 | ANGPT2;ANG   | 8  | 0.000186709 |
| -0.1110404 | cg05885688 | ANK1;ANK1;A  | 8  | 0.002012146 |
| -0.1511177 | cg08521995 | ANK1;ANK1;A  | 8  | 1.61E-06    |
| -0.1423353 | cg25212578 | ANK3         | 10 | 0.007299725 |
| -0.1157271 | cg26110900 | ANK3         | 10 | 0.002759594 |
| -0.1632521 | cg08067983 | ANKRD10      | 13 | 6.02E-05    |
| -0.1147947 | cg24065504 | ANKRD22      | 10 | 0.037402932 |
| -0.2476351 | cg10581071 | ANKRD33B     | 5  | 0.00014814  |
| -0.1371094 | cg12623145 | ANKRD36      | 2  | 0.019939278 |
| -0.126369  | cg10664971 | ANXA11;ANX   | 10 | 0.001522528 |

|            |            |             |    |             |
|------------|------------|-------------|----|-------------|
| -0.1082466 | cg25515997 | ANXA2;ANXA  | 15 | 0.001034385 |
| -0.1136841 | cg02415661 | AP1M1;AP1M  | 19 | 0.011725961 |
| -0.1190021 | cg02349866 | AP3S2;AP3S2 | 15 | 0.003471425 |
| -0.1415438 | cg10656128 | APBA2;APBA  | 15 | 0.026397677 |
| -0.1575054 | cg25354657 | APLP2;APLP2 | 11 | 0.000686369 |
| -0.1440936 | cg20032056 | APLP2;APLP2 | 11 | 0.00132737  |
| -0.1256034 | cg23729763 | APLP2;APLP2 | 11 | 0.000121998 |
| -0.1576819 | cg16066354 | APOBEC3D;A  | 22 | 0.006826185 |
| -0.1005319 | cg07713361 | APOL1;APOL  | 22 | 0.003338433 |
| -0.1549592 | cg14690065 | APOL6       | 22 | 0.011925795 |
| -0.1067352 | cg13494887 | APPL2       | 12 | 0.000288067 |
| -0.177815  | cg09676669 | AQP1        | 7  | 0.034857406 |
| -0.1898605 | cg15373767 | AQP1        | 7  | 0.016886865 |
| -0.1791145 | cg25230363 | AQP1        | 7  | 0.049450289 |
| -0.1565559 | cg07135629 | AQP1        | 7  | 0.000233085 |
| -0.1500976 | cg10132917 | AQP1        | 7  | 0.000169012 |
| -0.1500682 | cg04372674 | AQP1        | 7  | 0.036024679 |
| -0.1367679 | cg18307978 | AQP1        | 7  | 0.001580156 |
| -0.1357797 | cg00729275 | AQP4;C18orf | 18 | 0.043751503 |
| -0.1323405 | cg08554554 | ARFRP1;ARFR | 20 | 0.004713983 |
| -0.1038883 | cg03206044 | ARHGAP10    | 4  | 0.008934147 |
| -0.1006823 | cg01782668 | ARHGAP10    | 4  | 0.000930639 |
| -0.1430966 | cg24506434 | ARHGAP22    | 10 | 4.45E-06    |
| -0.1317418 | cg14555350 | ARHGAP26;A  | 5  | 0.000975879 |
| -0.1037556 | cg08339023 | ARHGAP9;AR  | 12 | 0.014119275 |
| -0.1089616 | cg04894027 | ARHGEF10L;A | 1  | 1.85E-06    |
| -0.1551419 | cg07233343 | ARHGEF10L;A | 1  | 0.000553072 |
| -0.1564934 | cg22524332 | ARHGEF10L;A | 1  | 4.85E-05    |
| -0.140183  | cg11587191 | ARHGEF16    | 1  | 0.003248193 |
| -0.1401361 | cg02311801 | ARHGEF17    | 11 | 8.87E-06    |
| -0.1230702 | cg11229273 | ARHGEF3     | 3  | 0.000106049 |
| -0.1205782 | cg05300440 | ARID1A;ARID | 1  | 0.000996708 |
| -0.1202852 | cg18973247 | ARID1A;ARID | 1  | 0.001134013 |
| -0.1438965 | cg02384859 | ARID3B      | 15 | 0.008515281 |
| -0.1228968 | cg08782899 | ARL16;HGS   | 17 | 3.88E-05    |
| -0.1212687 | cg18599155 | ARL8B       | 3  | 0.025202563 |
| -0.1190394 | cg18575863 | ARMC2       | 6  | 0.00019694  |
| -0.1378238 | cg19708986 | ARNT2       | 15 | 0.004647715 |
| -0.121936  | cg01446731 | ARNT2       | 15 | 3.05E-06    |
| -0.166114  | cg26165146 | ARNTL2      | 12 | 0.022750531 |
| -0.1298903 | cg21756647 | ARRB1;ARRB  | 11 | 1.44E-05    |
| -0.1766683 | cg05845141 | ARRDC2;ARR  | 19 | 9.99E-07    |
| -0.1360963 | cg00970435 | ARSG        | 17 | 0.03141223  |
| -0.1439055 | cg06404572 | ASAP1       | 8  | 0.004719708 |
| -0.1317357 | cg00013804 | ASAP2;ASAP  | 2  | 0.000701251 |
| -0.1151433 | cg23902076 | ASAP2;ASAP  | 2  | 8.30E-05    |

|            |            |              |    |             |
|------------|------------|--------------|----|-------------|
| -0.1116555 | cg06609004 | ATF6B;ATF6E  | 6  | 0.000282053 |
| -0.1063674 | cg17174275 | ATP10A       | 15 | 0.001123255 |
| -0.1055336 | cg15275965 | ATP10A       | 15 | 1.76E-05    |
| -0.1052112 | cg03525467 | ATP1A2       | 1  | 0.001052856 |
| -0.165423  | cg06956052 | ATP1A4       | 1  | 2.96E-05    |
| -0.1375686 | cg01948978 | ATP2B4;ATP2  | 1  | 0.005128879 |
| -0.1021595 | cg27484320 | ATP6V1B2     | 8  | 0.000634914 |
| -0.1724516 | cg22274117 | ATXN1;ATXN   | 6  | 0.036367986 |
| -0.1226085 | cg01898553 | AUTS2;AUTS:  | 7  | 0.024439381 |
| -0.1603923 | cg13881790 | AUTS2;AUTS:  | 7  | 3.88E-05    |
| -0.1358187 | cg04046364 | AVIL         | 12 | 0.008962054 |
| -0.1277806 | cg12807275 | AVPR1A       | 12 | 0.008521519 |
| -0.1940074 | cg15456115 | B3GNT3       | 19 | 0.000402171 |
| -0.1067746 | cg01706991 | BAALC;BAALC  | 8  | 1.22E-05    |
| -0.1105275 | cg17486314 | BACH2;BACH   | 6  | 0.010706295 |
| -0.1182672 | cg24859648 | BANF2;BANF   | 20 | 0.043751503 |
| -0.141964  | cg22902266 | BARX1        | 9  | 0.008768327 |
| -0.1403181 | cg04536765 | BAT3;BAT3;B  | 6  | 0.007158023 |
| -0.1372378 | cg14474158 | BAT3;BAT3;B  | 6  | 5.34E-06    |
| -0.1269508 | cg16175906 | BAT3;BAT3;B  | 6  | 5.52E-05    |
| -0.1142746 | cg27014438 | BAT3;BAT3;B  | 6  | 0.000350386 |
| -0.1301716 | cg23175322 | BATF2        | 11 | 0.003190565 |
| -0.1286652 | cg24965479 | BCAS3;BCAS:  | 17 | 0.046007068 |
| -0.1506475 | cg08724310 | BCAT1        | 12 | 0.014692291 |
| -0.10692   | cg09800500 | BCAT1        | 12 | 0.000952411 |
| -0.1004361 | cg19778647 | BCAT1        | 12 | 0.000443725 |
| -0.1005957 | cg21606696 | BCL3         | 19 | 0.000473555 |
| -0.1119442 | cg27087650 | BCL3         | 19 | 0.019947172 |
| -0.1560839 | cg01015175 | BCO2;BCO2    | 11 | 0.001282585 |
| -0.1142658 | cg12041459 | BEND6        | 6  | 0.000316335 |
| -0.1647999 | cg09970511 | BEND6        | 6  | 0.000138939 |
| -0.1148079 | cg00658449 | BEYLA;BEYLA  | 8  | 0.015250566 |
| -0.2014409 | cg13282594 | BGLAP        | 1  | 0.00047992  |
| -0.1002469 | cg07567376 | BICC1        | 10 | 0.000473559 |
| -0.1393904 | cg22641201 | BICC1        | 10 | 0.045514573 |
| -0.191206  | cg14200211 | BICD1;BICD1  | 12 | 0.000537896 |
| -0.1013469 | cg02887598 | BIN1;BIN1;BI | 2  | 0.000953716 |
| -0.2487811 | cg02023138 | BIN2         | 12 | 0.016417332 |
| -0.1734874 | cg24824842 | BIN3         | 8  | 0.006074175 |
| -0.1166919 | cg10002131 | BIRC8;BIRC8  | 19 | 0.003663943 |
| -0.1080475 | cg24062389 | BIVM;BIVM    | 13 | 0.000721711 |
| -0.1057241 | cg21863334 | BLCAP;BLCAF  | 20 | 0.000223852 |
| -0.1310585 | cg24890964 | BLCAP;BLCAF  | 20 | 0.025923832 |
| -0.1914666 | cg00920938 | BMP1;BMP1;   | 8  | 3.01E-07    |
| -0.1531435 | cg00359661 | BMP6         | 6  | 0.000603178 |
| -0.1391579 | cg26193418 | BMPER        | 7  | 0.000671064 |

|            |            |              |    |             |
|------------|------------|--------------|----|-------------|
| -0.1337277 | cg09807875 | BMPER        | 7  | 8.24E-05    |
| -0.1286802 | cg03291755 | BNC2         | 9  | 0.008575864 |
| -0.1223189 | cg06024391 | BPGM;BPGM    | 7  | 0.005672985 |
| -0.1021982 | cg13299824 | BRDT         | 1  | 0.023045656 |
| -0.1003171 | cg14732540 | BRDT         | 1  | 0.012182763 |
| -0.124696  | cg22719871 | BRMS1;BRM!   | 11 | 7.44E-06    |
| -0.1159585 | cg19651003 | BSG;BSG;BSC  | 19 | 2.96E-05    |
| -0.1369458 | cg20092122 | BST2         | 19 | 0.000793426 |
| -0.177229  | cg01686739 | BTBD11       | 12 | 0.000908097 |
| -0.1246794 | cg04909432 | BTBD17       | 17 | 0.002641526 |
| -0.1937864 | cg02923972 | BTBD19       | 1  | 6.50E-05    |
| -0.134859  | cg22690339 | BTBD9;BTBD!  | 6  | 0.044264427 |
| -0.1549023 | cg12238593 | BTN3A3;BTN   | 6  | 0.019986405 |
| -0.1566046 | cg03292206 | BUB1         | 2  | 0.000162203 |
| -0.1297761 | cg03970483 | C10orf28     | 10 | 0.000509655 |
| -0.1150728 | cg24842260 | C10orf41;C10 | 10 | 0.006294565 |
| -0.1133229 | cg03936104 | C10orf41;C10 | 10 | 0.030118369 |
| -0.1056041 | cg22618337 | C10orf81     | 10 | 6.99E-06    |
| -0.140833  | cg11204562 | C10orf81     | 10 | 0.000228772 |
| -0.1410415 | cg10627429 | C10orf81     | 10 | 0.001270878 |
| -0.1560563 | cg15579389 | C11orf21;C11 | 11 | 0.027034664 |
| -0.1092121 | cg02375832 | C11orf48     | 11 | 0.000970872 |
| -0.2403213 | cg07188648 | C11orf88;C11 | 11 | 0.039036459 |
| -0.1563304 | cg09166410 | C13orf16     | 13 | 0.004670741 |
| -0.1255886 | cg14973892 | C13orf18     | 13 | 0.006293052 |
| -0.1144089 | cg01533082 | C14orf37     | 14 | 0.003367228 |
| -0.1146805 | cg13017813 | C14orf4;C14c | 14 | 5.99E-05    |
| -0.1043573 | cg01456491 | C15orf62;DN  | 15 | 0.000498767 |
| -0.1293665 | cg09596762 | C16orf62     | 16 | 0.003288448 |
| -0.157188  | cg27153327 | C16orf73;C16 | 16 | 0.025216157 |
| -0.205978  | cg27638057 | C18orf45     | 18 | 0.000195317 |
| -0.1789401 | cg03214420 | C19orf61     | 19 | 6.75E-05    |
| -0.1521879 | cg24661168 | C1orf107     | 1  | 1.04E-05    |
| -0.1483072 | cg22341848 | C1orf128     | 1  | 0.000367672 |
| -0.1172141 | cg04486839 | C1orf192     | 1  | 0.008288455 |
| -0.1115857 | cg19729188 | C1orf52;C10r | 1  | 0.016137959 |
| -0.1121669 | cg16545954 | C1orf86      | 1  | 0.020902791 |
| -0.1401734 | cg06963192 | C1orf9;C1orf | 1  | 0.000538044 |
| -0.1366695 | cg07109332 | C1QA         | 1  | 0.009814268 |
| -0.1100667 | cg17807001 | C1QTNF1;C10  | 17 | 0.004037422 |
| -0.1182152 | cg22258892 | C1QTNF1;C10  | 17 | 0.000124554 |
| -0.1095007 | cg15013617 | C20orf141    | 20 | 0.005704961 |
| -0.1044343 | cg11800608 | C20orf85     | 20 | 8.32E-05    |
| -0.1337434 | cg03175417 | C22orf25     | 22 | 3.23E-05    |
| -0.119126  | cg06492283 | C2orf39      | 2  | 9.57E-05    |
| -0.1216765 | cg06709297 | C2orf48      | 2  | 0.002051738 |



|            |            |                   |    |             |
|------------|------------|-------------------|----|-------------|
| -0.1286737 | cg11277143 | C2orf48           | 2  | 0.000135153 |
| -0.1266487 | cg16421411 | C2orf48           | 2  | 0.000250423 |
| -0.1105369 | cg23005797 | C2orf48           | 2  | 6.79E-05    |
| -0.1007731 | cg04499514 | C3AR1             | 12 | 0.010181914 |
| -0.1220936 | cg05878887 | C3orf26;FILIF     | 3  | 0.004924544 |
| -0.2018466 | cg08350549 | C3orf26;FILIF     | 3  | 0.00223404  |
| -0.1225762 | cg04246167 | C3orf67           | 3  | 0.003436288 |
| -0.1539856 | cg00287773 | C5orf32           | 5  | 0.01326696  |
| -0.1300357 | cg03653573 | C5orf56           | 5  | 0.024946162 |
| -0.1050292 | cg26130669 | C6orf105;C6orf105 | 6  | 0.000799958 |
| -0.1623398 | cg01129238 | C6orf105;C6orf105 | 6  | 0.000128628 |
| -0.1384018 | cg08421910 | C6orf105;C6orf105 | 6  | 0.000828795 |
| -0.1617234 | cg15601361 | C6orf105;C6orf105 | 6  | 6.36E-05    |
| -0.1065728 | cg00483640 | C6orf195          | 6  | 0.025538855 |
| -0.1048931 | cg04405211 | C6orf195          | 6  | 0.000276767 |
| -0.1167783 | cg02379549 | C6orf89           | 6  | 0.040351037 |
| -0.1254147 | cg13565461 | C7orf11           | 7  | 0.019391677 |
| -0.1020037 | cg19543867 | C7orf53;C7orf53   | 7  | 0.020303505 |
| -0.1405881 | cg22920873 | C7orf55           | 7  | 3.38E-06    |
| -0.104801  | cg24340898 | C8orf45;C8orf45   | 8  | 0.037206652 |
| -0.1800307 | cg15947176 | C8orf46           | 8  | 0.000110917 |
| -0.1984611 | cg13869648 | C9orf98;C9orf98   | 9  | 0.000259418 |
| -0.1504577 | cg25221092 | CABLES1;CAE       | 18 | 0.000210109 |
| -0.1044327 | cg01288184 | CABLES1;CAE       | 18 | 0.000742139 |
| -0.1953018 | cg19966472 | CABYR;CABYL       | 18 | 0.014596215 |
| -0.1042012 | cg04400131 | CACHD1            | 1  | 0.026429272 |
| -0.1137982 | cg26995942 | CACNA1H;CACNA1H   | 16 | 0.003681655 |
| -0.1925383 | cg07890233 | CACNA1H;CACNA1H   | 16 | 0.029077611 |
| -0.1035804 | cg00383793 | CACNA2D2;CACNA2D2 | 3  | 0.002193247 |
| -0.1664289 | cg03364832 | CACNA2D3          | 3  | 0.018077958 |
| -0.1456092 | cg25626166 | CAMK1D;CAMK1D     | 10 | 0.021507833 |
| -0.1054062 | cg12273284 | CAMK1D;CAMK1D     | 10 | 0.014452417 |
| -0.1043474 | cg26177041 | CAMK2D;CAMK2D     | 4  | 4.66E-06    |
| -0.1035258 | cg17541002 | CAMKK2;CAMKK2     | 12 | 0.014273084 |
| -0.101195  | cg13202213 | CAMTA1            | 1  | 0.000320442 |
| -0.120381  | cg21583016 | CAMTA1            | 1  | 0.005955261 |
| -0.1688851 | cg07173049 | CAMTA1            | 1  | 0.000405691 |
| -0.1253314 | cg02275084 | CAMTA1            | 1  | 0.000114303 |
| -0.1727847 | cg02923485 | CAPN2;CAPN2       | 1  | 3.87E-05    |
| -0.1019839 | cg17081867 | CAPZB             | 1  | 0.00017321  |
| -0.1167332 | cg05820435 | CAPZB             | 1  | 0.000143421 |
| -0.1135037 | cg06360604 | CAPZB             | 1  | 1.30E-05    |
| -0.1677672 | cg11613157 | CARD8             | 19 | 0.006366548 |
| -0.1089967 | cg13415078 | CARKD             | 13 | 0.001332259 |
| -0.1439861 | cg25388715 | CASP7;CASP7       | 10 | 0.00423696  |
| -0.1141907 | cg14590325 | CBLL1;CBLL1       | 7  | 0.011533517 |

|            |            |             |    |             |
|------------|------------|-------------|----|-------------|
| -0.104484  | cg07220903 | CCDC12      | 3  | 0.016148289 |
| -0.1100173 | cg19805160 | CCDC19      | 1  | 0.000342352 |
| -0.1285513 | cg17482963 | CCDC25      | 8  | 0.002651903 |
| -0.1435671 | cg02708758 | CCDC33      | 15 | 0.001822197 |
| -0.1681533 | cg25939630 | CCDC50;CCD  | 3  | 0.003157276 |
| -0.1105744 | cg06394820 | CCDC86      | 11 | 0.015219002 |
| -0.1224545 | cg22693266 | CCDC91      | 12 | 0.000986862 |
| -0.1350845 | cg02932854 | CCL24       | 7  | 0.000897318 |
| -0.1000067 | cg11303839 | CCL26       | 7  | 0.0086713   |
| -0.144987  | cg08656816 | CCL5        | 17 | 0.000216127 |
| -0.1247205 | cg07740894 | CCNY;CCNY   | 10 | 0.001541759 |
| -0.1064175 | cg23817981 | CCR4        | 3  | 0.019180425 |
| -0.1547912 | cg07248223 | CCR7        | 17 | 0.033335824 |
| -0.1606425 | cg16047279 | CCR7        | 17 | 0.002613347 |
| -0.1271303 | cg18599081 | CCRL2;CCRL2 | 3  | 0.014251275 |
| -0.1428254 | cg23350385 | CCRL2;CCRL2 | 3  | 0.020517788 |
| -0.1330802 | cg01606773 | CD109;CD109 | 6  | 4.49E-05    |
| -0.1247909 | cg03976366 | CD207       | 2  | 0.00025595  |
| -0.1244577 | cg19090861 | CD248       | 11 | 0.017524533 |
| -0.1195041 | cg14910296 | CD276;CD276 | 15 | 0.009976326 |
| -0.1556865 | cg06601993 | CD36        | 7  | 0.030328896 |
| -0.1132619 | cg14082886 | CD44;CD44;C | 11 | 0.013204527 |
| -0.1012423 | cg13332350 | CD44;CD44;C | 11 | 0.029283126 |
| -0.1120561 | cg12467404 | CD55;CD55   | 1  | 0.010641765 |
| -0.1109196 | cg07440264 | CD59;CD59;C | 11 | 0.001445022 |
| -0.1635625 | cg23903301 | CD59;CD59;C | 11 | 0.000113754 |
| -0.1581391 | cg11848173 | CD63;CD63   | 12 | 0.017006793 |
| -0.1342623 | cg09944616 | CD7         | 17 | 0.000117501 |
| -0.1136271 | cg05175803 | CD82;CD82   | 11 | 8.66E-05    |
| -0.1164018 | cg21108085 | CD82;CD82   | 11 | 0.003476565 |
| -0.1888509 | cg07341609 | CDC42EP1    | 22 | 0.023709815 |
| -0.1009409 | cg23386895 | CDC42EP2    | 11 | 0.000257577 |
| -0.1133499 | cg12617598 | CDC73       | 1  | 0.014590335 |
| -0.1400893 | cg25624887 | CDCP1       | 3  | 0.003402242 |
| -0.1148516 | cg09220326 | CDCP1;CDCP  | 3  | 0.012121576 |
| -0.1046184 | cg09415485 | CDH13       | 16 | 0.000124176 |
| -0.100023  | cg10677324 | CDH29       | 3  | 0.000566042 |
| -0.1091349 | cg20026633 | CDH29       | 3  | 3.56E-06    |
| -0.1194024 | cg16325421 | CDH4        | 20 | 0.015523291 |
| -0.1229956 | cg15830572 | CDK11B;CDK  | 1  | 1.57E-05    |
| -0.1111315 | cg07571022 | CDK18;CDK18 | 1  | 0.004012961 |
| -0.1154424 | cg05101437 | CDK6;CDK6   | 7  | 0.020920281 |
| -0.1006669 | cg00908631 | CDKN2C      | 1  | 0.003678851 |
| -0.1141011 | cg06682875 | CDO1        | 5  | 0.00132649  |
| -0.1432409 | cg06726231 | CECR1;CECR1 | 22 | 0.000218031 |
| -0.1169363 | cg04026927 | CEP55;CEP55 | 10 | 0.002100686 |

|            |            |              |    |             |
|------------|------------|--------------|----|-------------|
| -0.1324994 | cg12124018 | CFB          | 6  | 0.000284425 |
| -0.1016203 | cg19446264 | CGB8         | 19 | 0.001525188 |
| -0.123023  | cg22819369 | CHAT;CHAT;(  | 10 | 0.002504259 |
| -0.1213484 | cg02070740 | CHD1L        | 1  | 0.015991481 |
| -0.1596903 | cg17143643 | CHIA;CHIA    | 1  | 0.007598743 |
| -0.1100314 | cg23202388 | CHID1;CHID1  | 11 | 0.006530427 |
| -0.1063489 | cg26531231 | CHRNA9       | 4  | 0.000978978 |
| -0.1071821 | cg16861964 | CHST11       | 12 | 0.036502264 |
| -0.1505846 | cg00608661 | CHST11       | 12 | 0.003073212 |
| -0.1351669 | cg18664965 | CHST13       | 3  | 0.001567906 |
| -0.166853  | cg08327038 | CIRH1A       | 16 | 0.000466499 |
| -0.1496163 | cg00685314 | CIT          | 12 | 9.82E-06    |
| -0.1378526 | cg00407062 | CIZ1;DNM1;I  | 9  | 0.002248436 |
| -0.1331999 | cg02295216 | CKLF;CKLF;Ck | 16 | 0.003885811 |
| -0.1193926 | cg10447615 | CLCC1;CLCC1  | 1  | 0.023817934 |
| -0.1034541 | cg25856090 | CLCN1        | 7  | 7.96E-05    |
| -0.1216556 | cg11571124 | CLIP1;CLIP1  | 12 | 0.029419331 |
| -0.2146579 | cg05239310 | CLMN         | 14 | 0.016294735 |
| -0.2077999 | cg00865429 | CLNK         | 4  | 0.000329603 |
| -0.2043425 | cg00220335 | CLPTM1L      | 5  | 3.84E-05    |
| -0.2009684 | cg22566694 | CMBL         | 5  | 0.007390255 |
| -0.2001967 | cg08834989 | CNGA3;CNGA   | 2  | 0.045661203 |
| -0.1964347 | cg15708127 | CNIH3        | 1  | 5.67E-06    |
| -0.1791869 | cg02825887 | CNTRF;CNTFI  | 9  | 0.015408714 |
| -0.178368  | cg15447971 | COL14A1      | 8  | 0.004632233 |
| -0.1777923 | cg00937175 | COL18A1      | 21 | 0.005923343 |
| -0.177604  | cg22809726 | COL1A1       | 17 | 0.005161898 |
| -0.1754566 | cg00638021 | COL1A1       | 17 | 0.00036351  |
| -0.1749328 | cg00439089 | COL1A1       | 17 | 0.000114417 |
| -0.1637989 | cg21847118 | COL1A1       | 17 | 9.91E-06    |
| -0.160946  | cg02827061 | COL1A1       | 17 | 1.09E-05    |
| -0.1592619 | cg25026926 | COL1A1       | 17 | 0.000263618 |
| -0.1567037 | cg14832352 | COL1A1       | 17 | 0.000271004 |
| -0.1525542 | cg14700325 | COL1A1       | 17 | 1.53E-05    |
| -0.1522894 | cg10368049 | COL1A2       | 7  | 0.033885569 |
| -0.1509903 | cg23348014 | COL1A2       | 7  | 0.015219002 |
| -0.1448446 | cg06299997 | COL1A2       | 7  | 0.002178742 |
| -0.1433096 | cg13327911 | COL21A1      | 6  | 0.027794267 |
| -0.1428461 | cg16930728 | COL22A1      | 8  | 0.004038795 |
| -0.1417134 | cg06485308 | COL23A1      | 5  | 0.001270878 |
| -0.1402063 | cg10275917 | COL28A1      | 7  | 0.000156205 |
| -0.1348677 | cg04815713 | COL4A2       | 13 | 0.000865639 |
| -0.1339518 | cg01493379 | COL6A3;COL   | 2  | 0.000931875 |
| -0.1329537 | cg18656024 | COL7A1       | 3  | 2.49E-05    |
| -0.1319429 | cg21175685 | COL8A1;MIR   | 3  | 0.00054979  |
| -0.1317703 | cg03073218 | COLEC10      | 8  | 0.001819666 |

|            |            |              |    |             |
|------------|------------|--------------|----|-------------|
| -0.1306191 | cg13569424 | COLEC12      | 18 | 0.02041047  |
| -0.1298158 | cg04395006 | CORO7        | 16 | 0.000164066 |
| -0.1268411 | cg20441135 | CPEB3        | 10 | 0.015146428 |
| -0.1264793 | cg24238409 | CPEB3        | 10 | 0.009020195 |
| -0.1226415 | cg19464524 | CPEB3        | 10 | 0.014419763 |
| -0.1191971 | cg16460727 | CPLX2;CPLX2  | 5  | 0.016945518 |
| -0.1189194 | cg19015686 | CPN1         | 10 | 0.041809033 |
| -0.116964  | cg06880930 | CPNE2        | 16 | 1.73E-05    |
| -0.1162451 | cg22881750 | CPNE5        | 6  | 0.018270183 |
| -0.1144617 | cg02558162 | CRABP1       | 15 | 0.002775493 |
| -0.1109334 | cg27183823 | CRAMP1L      | 16 | 0.00596693  |
| -0.1104237 | cg09709565 | CREB3L1      | 11 | 1.23E-06    |
| -0.1083893 | cg04072597 | CRLF1        | 19 | 0.007882933 |
| -0.1076942 | cg20737500 | CRMP1;CRM1   | 4  | 0.002395778 |
| -0.1075232 | cg16294414 | CROCC        | 1  | 0.038384945 |
| -0.1052081 | cg21531389 | CRYBB1       | 22 | 6.50E-05    |
| -0.1031779 | cg20450123 | CSGALNACT1   | 8  | 0.004825821 |
| -0.1021409 | cg06784232 | CSGALNACT1   | 8  | 0.00360901  |
| -0.1002493 | cg14722693 | CSGALNACT1   | 8  | 0.000285404 |
| -0.163447  | cg25581222 | CSNK1G1      | 15 | 0.020085497 |
| -0.1497088 | cg01473602 | CSRP2        | 12 | 6.01E-06    |
| -0.1406759 | cg00148286 | CTBP1;CTBP1  | 4  | 0.014624601 |
| -0.1358424 | cg16734845 | CTDSPL2      | 15 | 0.00216     |
| -0.1285508 | cg06968859 | CTNNA2;CTN   | 2  | 0.044247658 |
| -0.1272188 | cg13685506 | CTNND2       | 5  | 0.000369944 |
| -0.1225525 | cg08012294 | CTSB;CTSB;C  | 8  | 0.031438692 |
| -0.1200279 | cg23679724 | CTSZ         | 20 | 0.000104915 |
| -0.1124941 | cg25913882 | CUBN         | 10 | 0.000192032 |
| -0.1053749 | cg18965179 | CUX1;CUX1;C  | 7  | 0.038659201 |
| -0.1211882 | cg23261443 | CUX1;CUX1;C  | 7  | 0.007813656 |
| -0.1146237 | cg23217940 | CYFIP1;CYFIP | 15 | 6.40E-05    |
| -0.1915955 | cg02162897 | CYP1B1       | 2  | 0.017391395 |
| -0.1307241 | cg20408276 | CYP1B1       | 2  | 0.003896998 |
| -0.1324062 | cg14407177 | CYP1B1       | 2  | 0.00117359  |
| -0.1017254 | cg21637761 | CYTBS;CYTSB  | 17 | 1.29E-05    |
| -0.1290974 | cg25406518 | DAK;DDB1     | 11 | 0.001651259 |
| -0.1400513 | cg10156302 | DAPK2        | 15 | 0.003066477 |
| -0.1197982 | cg09597022 | DAXX;DAXX;I  | 6  | 0.005109301 |
| -0.1047886 | cg09365002 | DAXX;DAXX;I  | 6  | 0.006715896 |
| -0.1204728 | cg24498636 | DAXX;DAXX;I  | 6  | 0.018620714 |
| -0.1456802 | cg07905975 | DAXX;DAXX;I  | 6  | 0.008689117 |
| -0.1039249 | cg22904406 | DAXX;DAXX;I  | 6  | 0.00078336  |
| -0.1020685 | cg11151251 | DCAF5        | 14 | 2.45E-05    |
| -0.1590103 | cg02465887 | DCHS2        | 4  | 0.00719451  |
| -0.1464088 | cg08514408 | DCK          | 4  | 0.000240984 |
| -0.1163715 | cg17470143 | DCLK1        | 13 | 0.001443219 |

|            |            |             |    |             |
|------------|------------|-------------|----|-------------|
| -0.1647291 | cg23574583 | DCLK1       | 13 | 0.001830271 |
| -0.120278  | cg26932364 | DDC;DDC     | 7  | 0.001975684 |
| -0.1245446 | cg11972626 | DDX60L      | 4  | 0.000710639 |
| -0.1030449 | cg14585967 | DEC1        | 9  | 4.39E-05    |
| -0.1017093 | cg19931902 | DEFB129     | 20 | 0.010249789 |
| -0.1011055 | cg05226729 | DEFB135     | 8  | 0.005111119 |
| -0.1269605 | cg15591803 | DENND2D     | 1  | 5.91E-05    |
| -0.1234062 | cg03400695 | DENND3      | 8  | 1.22E-05    |
| -0.1505836 | cg00674995 | DGKH;DGKH   | 13 | 0.000953716 |
| -0.1432904 | cg02920600 | DGKI        | 7  | 1.03E-05    |
| -0.1144005 | cg10177197 | DHCR24      | 1  | 0.000257577 |
| -0.1021796 | cg17475467 | DHCR24      | 1  | 7.44E-06    |
| -0.1254383 | cg13624631 | DHRS7       | 14 | 0.005293338 |
| -0.1429412 | cg06115576 | DIP2C       | 10 | 0.000556904 |
| -0.153387  | cg09874796 | DIP2C       | 10 | 9.22E-05    |
| -0.1080184 | cg15123499 | DIP2C       | 10 | 0.000147617 |
| -0.1758661 | cg12596243 | DIRC3       | 2  | 1.21E-07    |
| -0.1302436 | cg08467371 | DIS3L2      | 2  | 0.02084264  |
| -0.1096362 | cg07328664 | DIS3L2      | 2  | 0.00052936  |
| -0.146805  | cg00550040 | DKFZp566F09 | 19 | 0.034367248 |
| -0.1015945 | cg26446832 | DKK3;DKK3;E | 11 | 4.93E-06    |
| -0.1795609 | cg10364881 | DKK3;DKK3;E | 11 | 0.010443146 |
| -0.1403123 | cg27395342 | DLC1;DLC1   | 8  | 0.000364322 |
| -0.1049899 | cg15681239 | DLEC1;DLEC1 | 3  | 0.028924973 |
| -0.2033058 | cg09179691 | DLGAP4;DLG  | 20 | 7.05E-06    |
| -0.1003856 | cg12626882 | DNAH9;DNAI  | 17 | 0.045970226 |
| -0.1615196 | cg14443182 | DNAJB5;DNA  | 9  | 0.000228772 |
| -0.1007271 | cg18126802 | DNM3;DNM3   | 1  | 0.017116775 |
| -0.1306152 | cg20420249 | DNM3;DNM3   | 1  | 0.017692389 |
| -0.2159909 | cg07802362 | DNM3;DNM3   | 1  | 0.00308293  |
| -0.1239773 | cg05363955 | DOCK10      | 2  | 0.001295248 |
| -0.1330484 | cg01818776 | DOCK5       | 8  | 0.023051461 |
| -0.1508493 | cg13760060 | DPF3        | 14 | 0.000899717 |
| -0.1839877 | cg26187031 | DPYSL2      | 8  | 0.000102627 |
| -0.1441194 | cg09075484 | DST         | 6  | 0.002767025 |
| -0.1295352 | cg17759095 | DST         | 6  | 0.027023509 |
| -0.1264301 | cg00136547 | DST;DST;DST | 6  | 0.025584255 |
| -0.113576  | cg18517540 | DTNA;DTNA;  | 18 | 4.42E-05    |
| -0.1203085 | cg20236089 | DTNBP1;DTN  | 6  | 0.004065792 |
| -0.1383265 | cg10888811 | DTYMK;DTYM  | 2  | 9.91E-06    |
| -0.1091792 | cg13570892 | DUOX1;DUOX  | 15 | 6.02E-05    |
| -0.1786514 | cg03290131 | DUSP5       | 10 | 0.02586869  |
| -0.1740457 | cg02927679 | DUSP5       | 10 | 0.000661035 |
| -0.1411367 | cg09357462 | DUSP5       | 10 | 0.000678114 |
| -0.1278836 | cg10080966 | DUSP5       | 10 | 6.81E-05    |
| -0.1274399 | cg10077746 | DUSP6;DUSP  | 12 | 0.030751631 |

|            |            |              |    |             |
|------------|------------|--------------|----|-------------|
| -0.1138905 | cg12127149 | DYNC1H1      | 14 | 0.001463943 |
| -0.1288201 | cg01670714 | DYNLRB1      | 20 | 0.008229354 |
| -0.1003574 | cg14784820 | DYSF;DYSF;D  | 2  | 1.55E-07    |
| -0.1013355 | cg11526198 | E2F2         | 1  | 0.001061054 |
| -0.1193944 | cg07616828 | EBF2         | 8  | 0.006857578 |
| -0.1005086 | cg05825244 | EBF4         | 20 | 0.00285512  |
| -0.1318346 | cg21005416 | ECE1;ECE1;E  | 1  | 0.010469132 |
| -0.1146283 | cg13447099 | ECE1;ECE1;E  | 1  | 0.001180179 |
| -0.1108802 | cg16386293 | ECM1;ECM1    | 1  | 0.000611947 |
| -0.115637  | cg10112943 | EDNRA;EDNF   | 4  | 0.001658877 |
| -0.1225114 | cg16264526 | EDNRA;EDNF   | 4  | 0.00815938  |
| -0.1161317 | cg03224812 | EFCAB4B;EFC  | 12 | 0.000169695 |
| -0.106783  | cg11401820 | EFTUD1;EFTL  | 15 | 0.033601869 |
| -0.1000831 | cg25625968 | EGFLAM;EGF   | 5  | 0.008038969 |
| -0.1975854 | cg04625338 | EGFR;EGFR;E  | 7  | 5.06E-05    |
| -0.1029986 | cg20682143 | EGLN1        | 1  | 0.001134013 |
| -0.1779641 | cg15945999 | EHBP1L1      | 11 | 3.33E-06    |
| -0.1716213 | cg05150973 | EHD1         | 11 | 0.000155587 |
| -0.1009595 | cg00648955 | EHD3         | 2  | 0.018534263 |
| -0.1165246 | cg09204108 | EHD4         | 15 | 0.026148648 |
| -0.1866577 | cg13632520 | EHMT1        | 9  | 0.011313915 |
| -0.155598  | cg19766988 | EIF3G        | 19 | 0.004027674 |
| -0.1180244 | cg05328461 | EIF3G        | 19 | 1.05E-07    |
| -0.1645935 | cg20044923 | EIF3H        | 8  | 0.000300624 |
| -0.1573713 | cg08822118 | EIF4G1;EIF4C | 3  | 0.004779284 |
| -0.2401258 | cg10776533 | EIF4G1;EIF4C | 3  | 3.82E-05    |
| -0.1281935 | cg04509882 | EIF4G1;EIF4C | 3  | 0.005909129 |
| -0.1471995 | cg01291854 | ELK3         | 12 | 0.000146694 |
| -0.1193001 | cg19028997 | ELK4;ELK4    | 1  | 0.001788548 |
| -0.1308147 | cg26245202 | ELK4;ELK4    | 1  | 0.001209181 |
| -0.2355571 | cg03773862 | ELMO1        | 7  | 0.000410834 |
| -0.1054225 | cg16353851 | ENC1         | 5  | 0.028303979 |
| -0.1135816 | cg22109370 | ENGASE       | 17 | 0.000151929 |
| -0.1589203 | cg11978634 | ENOX1;ENOX   | 13 | 1.68E-05    |
| -0.1318201 | cg07236691 | ENPP2;ENPP   | 8  | 0.00078788  |
| -0.1289648 | cg21211882 | EPB41L1;EPB  | 20 | 0.020195536 |
| -0.1191878 | cg24327877 | EPB41L2;EPB  | 6  | 0.010129277 |
| -0.1436408 | cg13678551 | EPB41L4B;EP  | 9  | 0.010779697 |
| -0.1055676 | cg21647035 | EPHA2        | 1  | 0.004282053 |
| -0.1385821 | cg10835083 | EPHA4        | 2  | 0.016159731 |
| -0.1028906 | cg14475913 | EPPK1        | 8  | 0.030402049 |
| -0.1351089 | cg01970336 | EPS15        | 1  | 0.020905735 |
| -0.2235396 | cg13696545 | ERC2         | 3  | 5.63E-05    |
| -0.1927044 | cg08488318 | ERGIC1       | 5  | 0.000376735 |
| -0.1818206 | cg13582457 | ERGIC1       | 5  | 0.021267599 |
| -0.1544226 | cg03321829 | ERGIC1       | 5  | 1.41E-06    |

|            |            |              |    |             |
|------------|------------|--------------|----|-------------|
| -0.1336207 | cg22709362 | ERI3         | 1  | 0.003025206 |
| -0.127744  | cg21376454 | ERN1         | 17 | 0.04205808  |
| -0.1257008 | cg21211780 | ESPN         | 1  | 0.003452433 |
| -0.1236092 | cg01395667 | ESPNP        | 1  | 0.003067028 |
| -0.1235932 | cg26180469 | ESRRA        | 11 | 3.31E-05    |
| -0.1220282 | cg27160968 | ESRRA        | 11 | 4.41E-05    |
| -0.1184214 | cg27428520 | ETNK2        | 1  | 1.76E-05    |
| -0.117813  | cg04165073 | ETS1;ETS1;ET | 11 | 0.000543212 |
| -0.1150174 | cg15256387 | ETV1;ETV1    | 7  | 0.010795225 |
| -0.1104584 | cg21463790 | ETV1;ETV1;E  | 7  | 0.025209755 |
| -0.1066373 | cg06518884 | ETV5         | 3  | 0.001548244 |
| -0.1034514 | cg11655490 | ETV6         | 12 | 0.034749333 |
| -0.124277  | cg08483376 | EVX1         | 7  | 0.006470209 |
| -0.1167091 | cg23298114 | EXT1         | 8  | 0.004115953 |
| -0.1293624 | cg15694987 | EXT1         | 8  | 1.41E-05    |
| -0.1102294 | cg18595324 | FABP3        | 1  | 5.35E-05    |
| -0.1462343 | cg16520965 | FAM109A      | 12 | 0.000274081 |
| -0.1307339 | cg06547285 | FAM113B      | 12 | 5.35E-05    |
| -0.1235455 | cg25123566 | FAM113B;LO   | 12 | 0.014413751 |
| -0.103853  | cg17320378 | FAM129C      | 19 | 0.002299711 |
| -0.1325234 | cg18006637 | FAM13A;FAM   | 4  | 0.000106516 |
| -0.1024356 | cg02771117 | FAM167A;C8   | 8  | 0.015756377 |
| -0.1240544 | cg13576290 | FAM179A      | 2  | 0.000244183 |
| -0.1409765 | cg13436110 | FAM188B      | 7  | 0.001768597 |
| -0.1362085 | cg12239580 | FAM198A      | 3  | 0.000756721 |
| -0.1411672 | cg12539917 | FAM19A5      | 22 | 0.00176452  |
| -0.1214445 | cg05006211 | FAM19A5      | 22 | 0.008702433 |
| -0.1418589 | cg08859215 | FAM20A       | 17 | 0.001419606 |
| -0.1125245 | cg18069356 | FAM20A       | 17 | 0.000161549 |
| -0.1066374 | cg08798862 | FAM38A       | 16 | 0.000387783 |
| -0.101674  | cg09115713 | FAM38A       | 16 | 8.30E-05    |
| -0.1054172 | cg06829760 | FAM49A       | 2  | 0.0055508   |
| -0.1351072 | cg04163638 | FAM49A       | 2  | 0.007644645 |
| -0.1468056 | cg04463607 | FAM55B       | 11 | 0.011397263 |
| -0.2057395 | cg27050407 | FAM65B       | 6  | 6.97E-06    |
| -0.197902  | cg03913278 | FAM66D;USF   | 8  | 0.046985565 |
| -0.1079439 | cg08893087 | FAM69A       | 1  | 0.011090081 |
| -0.1314437 | cg16689937 | FAM71D;FAM   | 14 | 0.00713872  |
| -0.1018988 | cg10624729 | FAM73A       | 1  | 0.000433964 |
| -0.1711717 | cg08256536 | FAM83A;FAM   | 8  | 0.005860211 |
| -0.2259217 | cg00831735 | FAM83A;FAM   | 8  | 0.000552257 |
| -0.1407979 | cg22223119 | FARP1        | 13 | 0.001512188 |
| -0.1555349 | cg17301987 | FARS2        | 6  | 0.000778556 |
| -0.1106091 | cg13456138 | FAS;FAS;FAS; | 10 | 0.000261403 |
| -0.100905  | cg03301671 | FAT1         | 4  | 0.000101608 |
| -0.1934478 | cg21061071 | FAT1         | 4  | 8.57E-05    |

|            |            |              |    |             |
|------------|------------|--------------|----|-------------|
| -0.1058587 | cg02325160 | FAT1         | 4  | 0.000458204 |
| -0.1334038 | cg04304779 | FAT1         | 4  | 0.000105601 |
| -0.104885  | cg23000950 | FBN1         | 15 | 0.006365318 |
| -0.1040874 | cg17835606 | FBN1         | 15 | 0.001444345 |
| -0.1153841 | cg18880986 | FBXL18       | 7  | 1.41E-05    |
| -0.1469616 | cg06639923 | FBXL18       | 7  | 0.017522802 |
| -0.1586855 | cg00456685 | FBXL2        | 3  | 0.022421327 |
| -0.1498583 | cg15894581 | FBXL22       | 15 | 0.000232779 |
| -0.1380912 | cg26233084 | FBXL7        | 5  | 0.010141485 |
| -0.1147889 | cg12897164 | FBXO32;FBXC  | 8  | 0.000246287 |
| -0.1760253 | cg17765387 | FBXW8;FBXV   | 12 | 0.000122221 |
| -0.159564  | cg16729555 | FCAMR;FCAM   | 1  | 0.002069295 |
| -0.1227161 | cg20806175 | FCER1G       | 1  | 0.006450112 |
| -0.1237513 | cg01612158 | FCRL4        | 1  | 0.007093571 |
| -0.1228639 | cg24664855 | FCRLA        | 1  | 0.016600202 |
| -0.1341286 | cg16174681 | FER          | 5  | 0.008288855 |
| -0.1143697 | cg20312012 | FER1L5       | 2  | 0.041548993 |
| -0.1413795 | cg20890440 | FER1L6       | 8  | 0.007027195 |
| -0.1149663 | cg00912772 | FGD6         | 12 | 0.000153939 |
| -0.1266693 | cg13724550 | FGF1;FGF1;F  | 5  | 1.41E-05    |
| -0.111199  | cg10220544 | FGGY;FGGY    | 1  | 0.002226428 |
| -0.1283338 | cg14279345 | FGGY;FGGY    | 1  | 5.24E-05    |
| -0.1563813 | cg03055021 | FHAD1        | 1  | 4.12E-06    |
| -0.1063352 | cg19652483 | FILIP1       | 6  | 0.00022218  |
| -0.1744193 | cg07061368 | FKBP5;FKBP5  | 6  | 0.00093487  |
| -0.1368614 | cg02832512 | FLJ22536     | 6  | 0.007763569 |
| -0.1473251 | cg05925497 | FLJ32810     | 11 | 0.04116896  |
| -0.1328274 | cg10051588 | FLJ39653;FLJ | 4  | 4.39E-05    |
| -0.1744493 | cg20228731 | FLJ43663;FLJ | 7  | 0.001391128 |
| -0.1018269 | cg15928106 | FLJ43663;FLJ | 7  | 0.00342599  |
| -0.1273821 | cg04219001 | FLOT1        | 6  | 0.000151929 |
| -0.1126445 | cg04070601 | FMNL3;FMNL   | 12 | 4.57E-05    |
| -0.1035512 | cg22803510 | FNBP1L;FNBP  | 1  | 0.005518696 |
| -0.1299509 | cg07739841 | FNDC1        | 6  | 0.012305037 |
| -0.1072527 | cg10064525 | FNDC7        | 1  | 9.91E-06    |
| -0.1116151 | cg11637968 | FNIP2        | 4  | 0.001362977 |
| -0.15703   | cg15691862 | FOXD2;FOXD   | 1  | 0.002530347 |
| -0.1488142 | cg14513071 | FOXD2;FOXD   | 1  | 0.003682719 |
| -0.1410285 | cg21496519 | FOXK1        | 7  | 0.008809446 |
| -0.1306337 | cg01808969 | FOXK1        | 7  | 0.003700783 |
| -0.1231676 | cg20710824 | FOXK2        | 17 | 0.000603403 |
| -0.105324  | cg25481160 | FOXP1        | 3  | 0.004293498 |
| -0.1180406 | cg20115117 | FOXP1;FOXP   | 3  | 0.029586445 |
| -0.1173962 | cg25356639 | FOXP1;FOXP   | 3  | 0.022345317 |
| -0.170134  | cg17803993 | FOXP1;FOXP   | 3  | 0.013845423 |
| -0.1579534 | cg22876402 | FOXP1;FOXP   | 3  | 0.007233891 |



|            |            |                 |    |             |
|------------|------------|-----------------|----|-------------|
| -0.1401205 | cg18996141 | FOXP1;FOXP1     | 3  | 0.000349224 |
| -0.102363  | cg09611620 | FOXP1;FOXP1     | 3  | 0.007479631 |
| -0.110687  | cg26785702 | FOXR1           | 11 | 3.45E-05    |
| -0.1076614 | cg22152605 | FPR1            | 19 | 0.002941769 |
| -0.13854   | cg11377213 | FRMD4B          | 3  | 0.030357774 |
| -0.1057883 | cg20789620 | FSD1            | 19 | 0.001227023 |
| -0.1552061 | cg26717066 | FSTL4           | 5  | 0.001083173 |
| -0.1829834 | cg02544257 | FUK             | 16 | 3.56E-06    |
| -0.1347052 | cg05618183 | FUS;FUS;FUS     | 16 | 0.04312022  |
| -0.1053035 | cg17682828 | FXVD1;FXVD1     | 19 | 0.016493892 |
| -0.1202759 | cg08061598 | FYN;FYN         | 6  | 8.04E-05    |
| -0.1173731 | cg16860392 | FYN;FYN;FYN     | 6  | 0.008784945 |
| -0.1101721 | cg16139912 | GADL1           | 3  | 1.25E-05    |
| -0.109503  | cg13579752 | GALNT10         | 5  | 0.001950451 |
| -0.1360589 | cg26201434 | GALNT10         | 5  | 0.023681761 |
| -0.1345593 | cg24556382 | GALNT7          | 4  | 0.001755759 |
| -0.2180484 | cg08912860 | GALNT9          | 12 | 0.015672303 |
| -0.155674  | cg20076126 | GALNTL1;GALNTL1 | 14 | 3.20E-05    |
| -0.1399419 | cg09573761 | GALR3           | 22 | 0.022268495 |
| -0.1447745 | cg23738585 | GAS7;GAS7       | 17 | 0.000309345 |
| -0.1134735 | cg23972785 | GATA4           | 8  | 0.033396408 |
| -0.1134393 | cg08202226 | GATAD2B         | 1  | 0.026713845 |
| -0.1193872 | cg03125765 | GATSL3          | 22 | 0.001002758 |
| -0.1038968 | cg22074858 | GBP3;GBP3       | 1  | 0.01445142  |
| -0.1104858 | cg00437411 | GCNT3           | 15 | 2.54E-05    |
| -0.1081711 | cg02335376 | GDPD3;LOC1      | 16 | 1.04E-07    |
| -0.1022127 | cg13002506 | GDPD4           | 11 | 0.035972375 |
| -0.1081037 | cg08268692 | GDPD4           | 11 | 0.002181429 |
| -0.1858833 | cg01522592 | GDPD5           | 11 | 0.002200279 |
| -0.1256514 | cg16874185 | GDPD5           | 11 | 0.000902988 |
| -0.1091242 | cg27601906 | GEM;GEM         | 8  | 0.021586482 |
| -0.1083126 | cg21638357 | GIGYF1          | 7  | 7.02E-05    |
| -0.1387515 | cg03538383 | GIT2;GIT2;GIT2  | 12 | 0.001016296 |
| -0.1023863 | cg02580095 | GJA1            | 6  | 0.000113754 |
| -0.1363228 | cg24425972 | GJB2            | 13 | 3.99E-07    |
| -0.1072494 | cg07999953 | GJB3;GJB3       | 1  | 0.00490877  |
| -0.1033888 | cg06644638 | GLB1L2          | 11 | 0.00023493  |
| -0.1217741 | cg12080831 | GLI2            | 2  | 0.00118493  |
| -0.1211053 | cg13168314 | GLIS1           | 1  | 0.008756106 |
| -0.1419395 | cg24741609 | GLIS1           | 1  | 0.008335631 |
| -0.1535236 | cg06935438 | GLIS3;GLIS3     | 9  | 0.000113973 |
| -0.1471007 | cg14325112 | GLIS3;GLIS3     | 9  | 1.60E-05    |
| -0.1778383 | cg03852144 | GLRX;GLRX       | 5  | 0.01560847  |
| -0.1746951 | cg22689909 | GLRX;GLRX       | 5  | 0.033260238 |
| -0.14151   | cg16677191 | GLRX;GLRX       | 5  | 0.041429925 |
| -0.1186357 | cg18131582 | GLT25D2         | 1  | 0.035987265 |

|            |            |             |    |             |
|------------|------------|-------------|----|-------------|
| -0.1132988 | cg01708377 | GMDS        | 6  | 0.008375787 |
| -0.1626407 | cg14863265 | GNA12       | 7  | 0.001638832 |
| -0.1329994 | cg22647996 | GNPDA1      | 5  | 3.48E-06    |
| -0.1313654 | cg15058852 | GNS         | 12 | 0.000974455 |
| -0.12578   | cg21809054 | GOLGA3      | 12 | 0.000259418 |
| -0.1221021 | cg18963763 | GOLGA7B     | 10 | 0.001255229 |
| -0.1079886 | cg02165670 | GPC6        | 13 | 1.43E-05    |
| -0.1252293 | cg11294750 | GPC6        | 13 | 0.006532443 |
| -0.1951547 | cg17274742 | GPNMB;GPN   | 7  | 0.004474888 |
| -0.1448883 | cg14444376 | GPNMB;GPN   | 7  | 0.026731449 |
| -0.1005393 | cg05790960 | GPR153      | 1  | 0.001585649 |
| -0.140199  | cg09626634 | GPR183;UBA  | 13 | 5.45E-05    |
| -0.1071676 | cg19182423 | GPR19       | 12 | 0.000504961 |
| -0.1021398 | cg05875421 | GPR68       | 14 | 0.003221222 |
| -0.1496086 | cg19374752 | GRASP       | 12 | 0.008254693 |
| -0.114327  | cg12358041 | GRB10;GRB1  | 7  | 0.000206569 |
| -0.1182765 | cg22834542 | GRM5;GRM5   | 11 | 0.011793067 |
| -0.1008911 | cg11566152 | GTF2E1      | 3  | 0.001682222 |
| -0.1258385 | cg11606195 | GTF2H3      | 12 | 0.000650739 |
| -0.1581859 | cg06745001 | GYS1;GYS1;G | 19 | 0.003568461 |
| -0.1720466 | cg11571702 | H2AFY;H2AF' | 5  | 0.001714376 |
| -0.1344078 | cg16356013 | H2AFY;H2AF' | 5  | 0.001470257 |
| -0.1214    | cg00245885 | H2AFY;H2AF' | 5  | 1.88E-05    |
| -0.1080367 | cg19449565 | HDAC4       | 2  | 0.030740654 |
| -0.1188244 | cg13531637 | HDAC4       | 2  | 0.000114417 |
| -0.1160098 | cg10515232 | HDAC4       | 2  | 0.000418227 |
| -0.1625981 | cg23462687 | HDAC4       | 2  | 0.000183675 |
| -0.1192442 | cg16348668 | HDAC4       | 2  | 0.001352229 |
| -0.113828  | cg04892643 | HDAC9;HDAC  | 7  | 0.001529541 |
| -0.1091415 | cg00332048 | HDAC9;HDAC  | 7  | 0.018419408 |
| -0.1204927 | cg03611265 | HEBP1       | 12 | 0.002893505 |
| -0.1232132 | cg23280720 | HECA        | 6  | 0.002157906 |
| -0.1008584 | cg08140114 | HECA        | 6  | 1.03E-05    |
| -0.1606523 | cg01213645 | HECW1       | 7  | 0.001322404 |
| -0.1410118 | cg23786580 | HECW1       | 7  | 0.000820432 |
| -0.1263397 | cg06931356 | HECW1       | 7  | 0.000360517 |
| -0.1232828 | cg09907068 | HECW2       | 2  | 0.025211973 |
| -0.1194494 | cg11029367 | HEG1        | 3  | 0.026818805 |
| -0.2042149 | cg13102889 | HES5        | 1  | 7.14E-06    |
| -0.124694  | cg03301084 | HEY1;HEY1   | 8  | 0.018277049 |
| -0.1225029 | cg14277677 | HIP1R       | 12 | 1.13E-05    |
| -0.1052888 | cg14848772 | HIST1H2AG   | 6  | 0.000309345 |
| -0.1019509 | cg09606421 | HIVEP2      | 6  | 0.000145062 |
| -0.1138663 | cg05519606 | HIVEP2      | 6  | 6.00E-05    |
| -0.1265544 | cg17575314 | HK1;HK1;HK1 | 10 | 0.000284425 |
| -0.1306617 | cg03221073 | HMCN1;MIR!  | 1  | 5.35E-05    |

|            |            |               |    |             |
|------------|------------|---------------|----|-------------|
| -0.1314754 | cg04890607 | HMGA2;HMC     | 12 | 0.006568327 |
| -0.1282698 | cg02123091 | HMGA2;HMC     | 12 | 4.30E-05    |
| -0.114677  | cg02836478 | HOXB3         | 17 | 0.010836593 |
| -0.1037669 | cg24963001 | HOXB3         | 17 | 0.047517013 |
| -0.1178741 | cg12570134 | HOXB3         | 17 | 0.007923249 |
| -0.1206863 | cg13280788 | HOXB3         | 17 | 0.04424622  |
| -0.1138454 | cg09720701 | HOXC4;HOXC    | 12 | 0.040547319 |
| -0.1091859 | cg16745930 | HPSE2;HPSE2   | 10 | 0.028568339 |
| -0.103239  | cg23247337 | HRH1          | 3  | 2.90E-05    |
| -0.1083269 | cg13593758 | HRH1          | 3  | 7.57E-05    |
| -0.1048988 | cg11702866 | HRH1;HRH1;I   | 3  | 0.001672238 |
| -0.1443834 | cg01420491 | HS1BP3        | 2  | 1.03E-05    |
| -0.1436637 | cg24888257 | HSPA1A;HSP    | 6  | 0.011564537 |
| -0.1302431 | cg22701672 | HTRA1         | 10 | 0.000364406 |
| -0.1201844 | cg00701951 | HTRA1         | 10 | 0.017204335 |
| -0.1136899 | cg15719652 | HTRA1         | 10 | 0.000628781 |
| -0.1550717 | cg11157691 | HTRA1         | 10 | 0.00835589  |
| -0.1033414 | cg23791011 | HTRA1         | 10 | 0.010979507 |
| -0.102458  | cg21121843 | HTT           | 4  | 0.035045749 |
| -0.1009949 | cg09386073 | ICT1          | 17 | 0.017631101 |
| -0.1535531 | cg21440776 | IFFO1;IFFO1;  | 12 | 0.01294105  |
| -0.1416526 | cg26550235 | IFFO2         | 1  | 0.007145812 |
| -0.101105  | cg07196514 | IFI16         | 1  | 0.043587475 |
| -0.1489756 | cg01342196 | IFI16         | 1  | 0.011354016 |
| -0.1047608 | cg24979161 | IFI27L1;IFI27 | 14 | 0.004078993 |
| -0.1082539 | cg06872964 | IFI44L        | 1  | 4.32E-05    |
| -0.1093521 | cg05526364 | IFT122;IFT12  | 3  | 0.001805755 |
| -0.1339777 | cg03163545 | IFT140;TMEM   | 16 | 0.014749254 |
| -0.1004337 | cg10236261 | IFT81;IFT81;I | 12 | 0.025698761 |
| -0.1322385 | cg18158670 | IGF1R         | 15 | 0.009038899 |
| -0.1184652 | cg25754852 | IGF2R         | 6  | 0.000394536 |
| -0.1444946 | cg17980404 | IGFBP4        | 17 | 0.001500709 |
| -0.1188827 | cg27409154 | IGFBP6        | 12 | 2.25E-05    |
| -0.1450953 | cg06559575 | IGFBP6        | 12 | 0.000288582 |
| -0.1262455 | cg10923036 | IGFBP7        | 4  | 0.000632074 |
| -0.109731  | cg11070420 | IGSF9B        | 11 | 3.91E-05    |
| -0.1132389 | cg26149678 | IL18BP;IL18B  | 11 | 0.026609204 |
| -0.1058807 | cg26788216 | IL1RL2        | 2  | 0.000353262 |
| -0.1261332 | cg11270633 | IL28B         | 19 | 0.015473777 |
| -0.133215  | cg04245540 | IL31RA        | 5  | 0.020314069 |
| -0.1005574 | cg16649560 | IL4R;IL4R     | 16 | 0.001477437 |
| -0.1547634 | cg04312209 | IL7R          | 5  | 0.011376575 |
| -0.1362408 | cg11854227 | ILDR1         | 3  | 0.000114417 |
| -0.1013042 | cg00694560 | ILDR1         | 3  | 0.001644819 |
| -0.100351  | cg25742037 | INS-IGF2;IGF  | 11 | 0.011735485 |
| -0.1867977 | cg22677858 | IPO9          | 1  | 0.021402589 |

|            |            |                |    |             |
|------------|------------|----------------|----|-------------|
| -0.1467751 | cg21055554 | IQCD           | 12 | 7.02E-05    |
| -0.135633  | cg05075308 | IRF2           | 4  | 0.004502863 |
| -0.1318724 | cg25312054 | IRS2           | 13 | 0.001882904 |
| -0.1323337 | cg10824810 | IRX5           | 16 | 0.019027757 |
| -0.1188788 | cg26293019 | ISL1           | 5  | 0.034360278 |
| -0.1396887 | cg24488317 | ISM1           | 20 | 4.85E-05    |
| -0.1115721 | cg09788003 | ISM2;ISM2      | 14 | 3.33E-06    |
| -0.1116972 | cg19801256 | ITGA1          | 5  | 0.000155166 |
| -0.1179155 | cg05377733 | ITGA11         | 15 | 0.000369233 |
| -0.1023914 | cg19185637 | ITGA11         | 15 | 0.000106662 |
| -0.1008022 | cg26184501 | ITGA3;ITGA3    | 17 | 1.50E-07    |
| -0.1228556 | cg04479212 | ITGA9          | 3  | 0.004182519 |
| -0.1104282 | cg08821998 | ITGA9          | 3  | 0.015654857 |
| -0.145575  | cg02225720 | ITGAE          | 17 | 0.008201784 |
| -0.1512161 | cg09149118 | ITGAV;ITGAV    | 2  | 0.009715656 |
| -0.1605752 | cg27296308 | ITGB1BP1;ITC   | 2  | 0.000232198 |
| -0.1113036 | cg22699620 | ITGB2;ITGB2    | 21 | 0.00048804  |
| -0.1300103 | cg00871980 | ITGB5          | 3  | 0.020976635 |
| -0.124485  | cg26689077 | ITGB7          | 12 | 0.001682695 |
| -0.116881  | cg04261556 | ITGB8          | 7  | 0.001252221 |
| -0.1543458 | cg05480883 | ITIH5;ITIH5;IT | 10 | 0.003288448 |
| -0.1703038 | cg01354782 | ITPR2          | 12 | 0.001758287 |
| -0.1769822 | cg04935278 | ITPRIP         | 10 | 0.000601007 |
| -0.1746732 | cg23523388 | ITPRIP         | 10 | 0.007964223 |
| -0.1006918 | cg24199006 | ITPRIP         | 10 | 0.007287708 |
| -0.1445448 | cg22888181 | ITPRIP         | 10 | 0.007843076 |
| -0.1984851 | cg22945413 | JAK1           | 1  | 0.008333197 |
| -0.1824119 | cg26797722 | JARID2         | 6  | 0.001495536 |
| -0.1269292 | cg01675238 | JMJD7-PLA2C    | 15 | 0.000137404 |
| -0.1000313 | cg12024811 | KALRN;KALRI    | 3  | 0.00240437  |
| -0.1065986 | cg10464130 | KALRN;KALRI    | 3  | 6.53E-05    |
| -0.1294634 | cg22550815 | KANK2;KANK     | 19 | 0.001289184 |
| -0.1416797 | cg17107691 | KANK2;KANK     | 19 | 3.88E-05    |
| -0.1708299 | cg22807822 | KANK2;KANK     | 19 | 2.19E-08    |
| -0.1555401 | cg20953257 | KANK2;KANK     | 19 | 7.67E-07    |
| -0.1497171 | cg25250013 | KANK2;KANK     | 19 | 0.000186651 |
| -0.1291629 | cg22626506 | KANK2;KANK     | 19 | 2.39E-06    |
| -0.117565  | cg14200574 | KCNA3          | 1  | 0.024983006 |
| -0.1569909 | cg16053064 | KCNAB2;KCN     | 1  | 0.000353262 |
| -0.1286577 | cg12705326 | KCNAB2;KCN     | 1  | 0.00023191  |
| -0.1198839 | cg05238695 | KCNE1;KCNE     | 21 | 1.16E-05    |
| -0.1176464 | cg09551019 | KCNH1;KCNH     | 1  | 7.73E-05    |
| -0.1397005 | cg09248613 | KCNH1;KCNH     | 1  | 0.000114266 |
| -0.106543  | cg01627597 | KCNK3          | 2  | 0.002767025 |
| -0.1623213 | cg11273176 | KCNK3          | 2  | 0.000921582 |
| -0.1043011 | cg19972648 | KCNMA1;KCN     | 10 | 1.85E-06    |

|            |            |               |    |             |
|------------|------------|---------------|----|-------------|
| -0.1034425 | cg22646937 | KCNMB1;KCN    | 5  | 0.011648298 |
| -0.1114486 | cg03291996 | KCNMB2;KCN    | 3  | 0.00070167  |
| -0.22751   | cg07830086 | KCNN1         | 19 | 3.09E-06    |
| -0.1530914 | cg05343739 | KCNN3;KCNN    | 1  | 0.001124295 |
| -0.1610407 | cg23750514 | KCNQ1;KCNC    | 11 | 6.17E-05    |
| -0.1352486 | cg12776287 | KCTD1;KCTD    | 18 | 0.026599141 |
| -0.1058756 | cg24193140 | KCTD16        | 5  | 0.000589408 |
| -0.1255908 | cg06254425 | KCTD2         | 17 | 0.034477546 |
| -0.1538069 | cg21400851 | KCTD2         | 17 | 0.003158336 |
| -0.1273683 | cg26475911 | KCTD2         | 17 | 0.000223793 |
| -0.1132102 | cg01678472 | KCTD2         | 17 | 0.009528462 |
| -0.1333631 | cg10016358 | KCTD2         | 17 | 5.08E-07    |
| -0.1133436 | cg09185884 | KCTD2         | 17 | 0.003368554 |
| -0.1229417 | cg09175485 | KDM2A;KDM     | 11 | 0.013043488 |
| -0.1490034 | cg19764940 | KDM4B         | 19 | 0.002529136 |
| -0.1142076 | cg21031917 | KHDRBS2       | 6  | 0.014271275 |
| -0.1135371 | cg24471894 | KIAA0020      | 9  | 0.016997002 |
| -0.1387753 | cg03535079 | KIAA0146      | 8  | 0.044004685 |
| -0.1260189 | cg16328023 | KIAA0895;KI   | 7  | 0.028186025 |
| -0.1102751 | cg00101629 | KIAA1026;KI   | 1  | 0.010471399 |
| -0.1274779 | cg26526047 | KIAA1217      | 10 | 0.021876351 |
| -0.1356302 | cg07814122 | KIAA1467      | 12 | 0.007276414 |
| -0.1058431 | cg08908131 | KIAA1598;KI   | 10 | 0.001282329 |
| -0.1595234 | cg11165619 | KIAA1644      | 22 | 0.000457471 |
| -0.1462584 | cg17889356 | KIAA1671      | 22 | 0.006911462 |
| -0.1331355 | cg02790458 | KIAA1683;KI   | 19 | 0.003251176 |
| -0.137255  | cg01413582 | KIAA1949;KI   | 6  | 0.007233891 |
| -0.1152391 | cg11554650 | KIAA1949;KI   | 6  | 0.000901201 |
| -0.1503987 | cg18427856 | KIAA1949;KI   | 6  | 0.012771384 |
| -0.1081103 | cg00278359 | KIAA1949;KI   | 6  | 0.001260378 |
| -0.1071142 | cg12105190 | KIAA1949;KI   | 6  | 0.001964579 |
| -0.1024095 | cg12036303 | KIAA1949;KI   | 6  | 0.004566792 |
| -0.1621991 | cg01662942 | KIF1A         | 2  | 0.004724451 |
| -0.1068068 | cg17500202 | KIF1A         | 2  | 0.000308815 |
| -0.1368884 | cg12468119 | KIF26A        | 14 | 0.027601907 |
| -0.1136585 | cg01078772 | KIF3B         | 20 | 0.000403289 |
| -0.1120074 | cg17275551 | KIF6          | 6  | 9.82E-06    |
| -0.1361503 | cg16429725 | KIFC3;KIFC3;I | 16 | 5.35E-06    |
| -0.1049452 | cg17422915 | KIRREL3;KIRF  | 11 | 4.96E-05    |
| -0.1280485 | cg07171504 | KLF10;KLF10   | 8  | 0.000163045 |
| -0.1055747 | cg06724409 | KLF6;KLF6;KL  | 10 | 6.42E-05    |
| -0.112276  | cg24074448 | KLHL26        | 19 | 1.53E-05    |
| -0.135362  | cg13168117 | KLHL30        | 2  | 0.000564104 |
| -0.1038886 | cg15792367 | KLK11;KLK11   | 19 | 0.027136001 |
| -0.1191272 | cg05377120 | KLRD1         | 12 | 0.000250061 |
| -0.134728  | cg00033834 | KNDC1         | 10 | 0.009814268 |

|            |            |              |    |             |
|------------|------------|--------------|----|-------------|
| -0.1919882 | cg20063450 | KRT32        | 17 | 0.000401143 |
| -0.1602008 | cg19092735 | KRT80;KRT8C  | 12 | 0.002815188 |
| -0.1581495 | cg11051139 | KRT80;KRT8C  | 12 | 0.010875201 |
| -0.1467904 | cg07925587 | KRT80;KRT8C  | 12 | 0.009935931 |
| -0.1289954 | cg14588606 | KRTAP1-5     | 17 | 0.008392504 |
| -0.1100583 | cg19055323 | KRTAP4-1     | 17 | 0.010032752 |
| -0.1148668 | cg03041510 | LAMB1        | 7  | 0.033189324 |
| -0.1414877 | cg07168232 | LAMB3;LAMI   | 1  | 0.00032747  |
| -0.1108745 | cg22809683 | LAMC1        | 1  | 0.003301155 |
| -0.1032026 | cg18030943 | LAMP3        | 3  | 0.002787667 |
| -0.116333  | cg20645232 | LARP6;LARPE  | 15 | 0.005696888 |
| -0.137759  | cg21211645 | LARS2        | 3  | 4.79E-06    |
| -0.1359322 | cg18793512 | LBH          | 2  | 0.016748449 |
| -0.1079415 | cg02379079 | LBP          | 20 | 0.001452178 |
| -0.1010438 | cg08895932 | LCE1C        | 1  | 0.03379578  |
| -0.100652  | cg10991454 | LCLAT1;LCLA  | 2  | 0.015766612 |
| -0.1037477 | cg06818159 | LDB2;LDB2    | 4  | 0.042478589 |
| -0.1320637 | cg19286437 | LDB3;LDB3;L  | 10 | 0.000599864 |
| -0.1299111 | cg06180729 | DLRAD3       | 11 | 0.000465399 |
| -0.1590105 | cg15466952 | LEPR;LEPR;LE | 1  | 0.003281388 |
| -0.1969806 | cg18072282 | LGALS2       | 22 | 0.029638053 |
| -0.163034  | cg08962888 | LGALS3BP     | 17 | 0.040437541 |
| -0.154848  | cg27110877 | LHFPL2       | 5  | 0.016180639 |
| -0.1217021 | cg26658897 | LHFPL2       | 5  | 0.017534636 |
| -0.1077261 | cg21525176 | LHFPL2       | 5  | 0.000292125 |
| -0.1033537 | cg05497253 | LHFPL2       | 5  | 1.76E-05    |
| -0.1162347 | cg16326367 | LHFPL2       | 5  | 0.000112048 |
| -0.1404411 | cg13420848 | LHX9;LHX9    | 1  | 0.010547386 |
| -0.1038693 | cg08463788 | LHX9;LHX9    | 1  | 0.031984492 |
| -0.1171392 | cg06661450 | LHX9;LHX9    | 1  | 0.015700627 |
| -0.1333427 | cg05365532 | LILRB1       | 19 | 0.005529764 |
| -0.1244702 | cg01761729 | LIMS2;LIMS2  | 2  | 8.24E-06    |
| -0.1535911 | cg27307975 | LIPC         | 15 | 0.001811904 |
| -0.1241612 | cg12581682 | LIPC         | 15 | 0.000143421 |
| -0.1191094 | cg20701183 | LMO4         | 1  | 0.021307147 |
| -0.1085315 | cg04757411 | LMO7         | 13 | 0.017470581 |
| -0.1011078 | cg26400954 | LMO7         | 13 | 0.000773305 |
| -0.1060395 | cg18560915 | LNX1         | 4  | 0.004816627 |
| -0.1280873 | cg12303160 | LNX1;LNX1    | 4  | 0.001492235 |
| -0.1257799 | cg18052274 | LOC1001267   | 11 | 0.040064911 |
| -0.1224144 | cg05003908 | LOC1001302   | 8  | 0.020902791 |
| -0.1034333 | cg20756245 | LOC1001308   | 4  | 0.010352099 |
| -0.1048683 | cg00130808 | LOC145845    | 15 | 0.006294914 |
| -0.1051658 | cg11965311 | LOC145845    | 15 | 0.03631063  |
| -0.107611  | cg06451900 | LOC145845    | 15 | 0.014885338 |
| -0.1131864 | cg02938422 | LOC255025    | 3  | 0.035640972 |

|            |            |              |    |             |
|------------|------------|--------------|----|-------------|
| -0.1119723 | cg00945409 | LOC283050;L  | 10 | 0.018925506 |
| -0.1368828 | cg07092135 | LOC285419;L  | 4  | 0.002138024 |
| -0.118481  | cg09483595 | LOC285627    | 5  | 0.043771663 |
| -0.1008485 | cg27250427 | LOC285768;L  | 6  | 1.65E-06    |
| -0.1811198 | cg01751584 | LOC286359    | 9  | 0.034824446 |
| -0.1147602 | cg01277890 | LOC389333    | 5  | 0.000200353 |
| -0.1637246 | cg05487507 | LOC404266;L  | 17 | 0.021858677 |
| -0.1609379 | cg15908709 | LOC404266;L  | 17 | 0.038818226 |
| -0.1005912 | cg24550933 | LOC441897    | 1  | 0.000155381 |
| -0.1910859 | cg00071887 | LOXL1        | 15 | 0.000246542 |
| -0.138429  | cg02524983 | LPP;LPP;LPP  | 3  | 0.008889067 |
| -0.159321  | cg00902153 | LPP;LPP;LPP  | 3  | 0.001365946 |
| -0.1116484 | cg02044895 | LPXN;LPXN;L  | 11 | 0.021383482 |
| -0.2003722 | cg18454510 | LRFN2        | 6  | 4.32E-05    |
| -0.10901   | cg18005280 | LRIG1        | 3  | 0.011694247 |
| -0.1081473 | cg03678566 | LRP5         | 11 | 0.003615508 |
| -0.1013907 | cg25366155 | LRP5         | 11 | 0.020741254 |
| -0.1033482 | cg19204693 | LRP5         | 11 | 0.002214005 |
| -0.1100733 | cg09670263 | LRRC2;LRRC2  | 3  | 5.03E-05    |
| -0.1195424 | cg05076755 | LRRC32;LRRC  | 11 | 0.036546542 |
| -0.1046464 | cg04348023 | LRRC7;PIN1L  | 1  | 0.005792559 |
| -0.1260137 | cg26233651 | LRRC8C       | 1  | 0.001029239 |
| -0.1185891 | cg19497511 | LRRFIP1;LRRF | 2  | 0.002344105 |
| -0.11012   | cg15819128 | LRRFIP1;LRRF | 2  | 0.045579379 |
| -0.1027167 | cg14340889 | LTBP2        | 14 | 0.000251572 |
| -0.1391848 | cg03491087 | LTBP2        | 14 | 0.002542208 |
| -0.1463575 | cg16056219 | LTBP2        | 14 | 0.000513836 |
| -0.1821927 | cg25298596 | LUM          | 12 | 0.003271439 |
| -0.1875842 | cg14276794 | LYVE1        | 11 | 0.000745288 |
| -0.12796   | cg26864766 | MACF1;MAC    | 1  | 0.038546185 |
| -0.1272314 | cg27292099 | MACF1;MAC    | 1  | 0.00019977  |
| -0.1189459 | cg00502509 | MAD1L1;MA    | 7  | 0.00142078  |
| -0.1062548 | cg27109748 | MAD1L1;MA    | 7  | 0.000532616 |
| -0.1116224 | cg04277993 | MAEA;MAEA    | 4  | 0.001342398 |
| -0.1326723 | cg00575665 | MAFB;MAFB    | 20 | 0.005627745 |
| -0.1248342 | cg14649449 | MAMDC2       | 9  | 0.00023493  |
| -0.106583  | cg01093786 | MAML2        | 11 | 0.017692389 |
| -0.1420379 | cg15521790 | MAML2        | 11 | 0.001424322 |
| -0.1040771 | cg23206160 | MAML3        | 4  | 0.020557993 |
| -0.129863  | cg03597159 | MAML3        | 4  | 0.000272007 |
| -0.1076694 | cg08880153 | MAP1A        | 15 | 0.00040458  |
| -0.1158774 | cg14573876 | MAP2K2       | 19 | 0.02809595  |
| -0.1079839 | cg14321936 | MAPKAPK3     | 3  | 0.005507364 |
| -0.1037361 | cg16805068 | MAPRE1       | 20 | 0.004601226 |
| -0.1208077 | cg13963033 | MARCH3       | 5  | 0.027567175 |
| -0.1076944 | cg02224164 | MARS         | 12 | 0.000217662 |

|            |            |             |    |             |
|------------|------------|-------------|----|-------------|
| -0.1260042 | cg25818109 | MASP1       | 3  | 0.004391788 |
| -0.1446439 | cg16762684 | MBP;MBP     | 18 | 0.043077156 |
| -0.1005482 | cg24446429 | MBP;MBP     | 18 | 0.009081216 |
| -0.1091531 | cg22422251 | MCC;MCC     | 5  | 0.003311419 |
| -0.1481762 | cg06062378 | MCC;MCC     | 5  | 0.015227466 |
| -0.1399603 | cg08213909 | MCC;MCC     | 5  | 0.000243837 |
| -0.1096186 | cg23668581 | ME3;ME3;MI  | 11 | 0.013845726 |
| -0.1050058 | cg14572252 | MECOM       | 3  | 0.014157995 |
| -0.1041684 | cg04754652 | MED12L;GPR  | 3  | 0.022652347 |
| -0.1229861 | cg05689413 | MED20       | 6  | 0.025129614 |
| -0.1504282 | cg19390582 | MED26       | 19 | 0.005573739 |
| -0.1167454 | cg03301498 | MED29       | 19 | 0.01156845  |
| -0.115908  | cg03919650 | MEFV        | 16 | 0.034280915 |
| -0.1020817 | cg26846864 | MEFV        | 16 | 0.000756031 |
| -0.1013076 | cg01909364 | MEOX1;MEO   | 17 | 0.000159318 |
| -0.1121594 | cg11056055 | MET;MET     | 7  | 0.001558637 |
| -0.1467594 | cg24197567 | MET;MET     | 7  | 0.00051766  |
| -0.1484035 | cg02633149 | METRNL      | 17 | 0.002405086 |
| -0.11505   | cg19306948 | MFAP2;MFAI  | 1  | 0.007353717 |
| -0.1071493 | cg17744878 | MFAP2;MFAI  | 1  | 0.024415526 |
| -0.1167658 | cg12695612 | MFAP2;MFAI  | 1  | 0.000218031 |
| -0.1501556 | cg08477744 | MFAP2;MFAI  | 1  | 0.000353369 |
| -0.1088266 | cg07086226 | MFSD7       | 4  | 8.41E-06    |
| -0.1050293 | cg06040925 | MFSD9       | 2  | 0.004178968 |
| -0.1019217 | cg01476044 | MGAM        | 7  | 0.002326914 |
| -0.1096777 | cg17376299 | MGAT5B;MG   | 17 | 0.000574146 |
| -0.108419  | cg10435609 | MGC27382    | 1  | 0.000305871 |
| -0.118736  | cg16027775 | MGLL;MGLL   | 3  | 0.000481276 |
| -0.1183457 | cg22575127 | MGMT        | 10 | 0.000511988 |
| -0.1400267 | cg03421014 | MGST2       | 4  | 0.008707287 |
| -0.1217234 | cg03821121 | MICAL2      | 11 | 0.029627362 |
| -0.1565174 | cg09371112 | MICAL2      | 11 | 4.75E-05    |
| -0.1150198 | cg02614016 | MINPP1      | 10 | 0.001512188 |
| -0.1334657 | cg24199384 | MIPEP       | 13 | 0.00191677  |
| -0.1170438 | cg02206323 | MIR1180;B9I | 17 | 0.000668212 |
| -0.1241568 | cg22492271 | MIR1200;ELN | 7  | 0.00917043  |
| -0.1096712 | cg07018107 | MIR1208     | 8  | 0.014338604 |
| -0.122819  | cg19312305 | MIR122      | 18 | 0.001433468 |
| -0.1194443 | cg15759721 | MIR21       | 17 | 0.019463215 |
| -0.1311076 | cg04276626 | MIR21       | 17 | 3.91E-06    |
| -0.123927  | cg02515217 | MIR21       | 17 | 0.002388453 |
| -0.1110938 | cg03184776 | MIR2117     | 17 | 0.002706772 |
| -0.1139059 | cg25687874 | MIR2117     | 17 | 0.000234229 |
| -0.1544778 | cg06961429 | MIR329-2    | 14 | 0.001674676 |
| -0.1107827 | cg11780042 | MIR329-2    | 14 | 0.005994218 |
| -0.119409  | cg26664528 | MIR548H4;N  | 15 | 0.000155903 |



|            |            |              |    |             |
|------------|------------|--------------|----|-------------|
| -0.11471   | cg20587874 | MIR548N      | 2  | 0.010798128 |
| -0.1049748 | cg04811592 | MITF;MITF    | 3  | 0.00013906  |
| -0.1272798 | cg05632420 | MKLN1;FLJ43  | 7  | 0.004295214 |
| -0.1047584 | cg10085326 | MMP13        | 11 | 0.002455849 |
| -0.1170024 | cg24938761 | MOBKL2A      | 19 | 0.015917143 |
| -0.1563401 | cg14643264 | MOBKL2B      | 9  | 0.039844021 |
| -0.1525479 | cg11027707 | MON1A;MOI    | 3  | 0.01540203  |
| -0.1207364 | cg01422009 | MPG          | 16 | 0.000327845 |
| -0.1253794 | cg18936620 | MPL          | 1  | 0.029918335 |
| -0.1112006 | cg17327331 | MPP5         | 14 | 0.000109944 |
| -0.1024966 | cg02543159 | MPPED1       | 22 | 0.005273124 |
| -0.1132261 | cg11733958 | MPRIIP;MPRII | 17 | 0.00724137  |
| -0.1412911 | cg03289072 | MRC2         | 17 | 0.006431636 |
| -0.1191321 | cg23882131 | MRGPRF;MR    | 11 | 0.001410566 |
| -0.1474804 | cg13734833 | MRGPRF;MR    | 11 | 0.000458121 |
| -0.1358905 | cg19716170 | MRPL19       | 2  | 0.024138776 |
| -0.1200058 | cg04713108 | MRPS30       | 5  | 0.000879469 |
| -0.1012389 | cg26966828 | MSRA;MSRA    | 8  | 0.0006122   |
| -0.145724  | cg16773768 | MSRA;MSRA    | 8  | 0.000562384 |
| -0.1385444 | cg00791074 | MTHFD1L      | 6  | 0.000450965 |
| -0.1199128 | cg20694147 | MTHFD2;MT    | 2  | 0.001521985 |
| -0.1235238 | cg11750962 | MTOR         | 1  | 0.001346819 |
| -0.1278459 | cg05013438 | MTSS1        | 8  | 0.002160293 |
| -0.1336117 | cg09351308 | MVD          | 16 | 0.006880224 |
| -0.130354  | cg25368647 | MXD3;MXD3    | 5  | 0.010524949 |
| -0.1249843 | cg12583369 | MYCL1;MYCL   | 1  | 0.000606677 |
| -0.1550688 | cg00421089 | MYH1         | 17 | 0.009268759 |
| -0.1543175 | cg20482145 | MYH10        | 17 | 0.000221885 |
| -0.1049742 | cg26086902 | MYH13        | 17 | 9.10E-07    |
| -0.1663925 | cg19611163 | MYLK;MYLK;l  | 3  | 0.006302431 |
| -0.1159469 | cg01894985 | MYLK;MYLK;l  | 3  | 0.001741661 |
| -0.1030834 | cg06742628 | MYO10        | 5  | 0.002367785 |
| -0.141542  | cg06844526 | MYO1B;MYO    | 2  | 0.028246161 |
| -0.1233459 | cg12404831 | MYO1B;MYO    | 2  | 0.000221568 |
| -0.1010572 | cg02920604 | MYO1E        | 15 | 0.00139102  |
| -0.1341826 | cg17430370 | MYO3B;MYO    | 2  | 0.00047641  |
| -0.1237721 | cg02589604 | MYT1L        | 2  | 0.000790082 |
| -0.1504985 | cg18700744 | NAA25        | 12 | 6.93E-05    |
| -0.1078442 | cg06934394 | NALCN        | 13 | 0.000981512 |
| -0.1479435 | cg08468577 | NAP1L4       | 11 | 0.004038049 |
| -0.1201873 | cg05312104 | NAV2         | 11 | 2.17E-05    |
| -0.1077029 | cg02849401 | NAV2         | 11 | 0.009503409 |
| -0.1342316 | cg14534803 | NAV2         | 11 | 5.15E-05    |
| -0.1051452 | cg18422632 | NAV2         | 11 | 2.31E-06    |
| -0.1284039 | cg02959112 | NBL1;NBL1    | 1  | 0.000159769 |
| -0.1080121 | cg06389574 | NCKAP5;NCK   | 2  | 0.021883179 |

|            |            |             |    |             |
|------------|------------|-------------|----|-------------|
| -0.1807598 | cg27431877 | NCOR2;NCOF  | 12 | 0.005112924 |
| -0.1490338 | cg12157156 | NCOR2;NCOF  | 12 | 3.02E-05    |
| -0.1075878 | cg04804139 | NCOR2;NCOF  | 12 | 4.34E-05    |
| -0.1543718 | cg11798406 | NCRNA00114  | 21 | 0.006972796 |
| -0.1388055 | cg21327826 | NDOR1;NDO   | 9  | 0.012182763 |
| -0.13874   | cg09028166 | NDST1       | 5  | 0.000944702 |
| -0.1386561 | cg04436964 | NDUFS2;ADA  | 1  | 0.00040458  |
| -0.1366553 | cg17280514 | NEU4;NEU4;l | 2  | 0.000589694 |
| -0.1285907 | cg14247287 | NEURL3      | 2  | 0.001384761 |
| -0.1134485 | cg14557268 | NF1;NF1     | 17 | 0.00100609  |
| -0.1104793 | cg10186605 | NF1;NF1     | 17 | 0.002515451 |
| -0.1098857 | cg14193653 | NFIL3       | 9  | 0.018556062 |
| -0.1070126 | cg14290576 | NFIL3       | 9  | 5.04E-06    |
| -0.1065911 | cg25309493 | NGEF        | 2  | 0.000106516 |
| -0.1042515 | cg04237618 | NGF         | 1  | 0.000424824 |
| -0.1021031 | cg11087503 | NID2        | 14 | 0.001448836 |
| -0.1259001 | cg16303048 | NID2        | 14 | 0.017209964 |
| -0.1093938 | cg24575128 | NISCH       | 3  | 0.022027448 |
| -0.1585376 | cg03029752 | NLRX1;NLRX: | 11 | 8.64E-06    |
| -0.1098023 | cg14520913 | NNMT        | 11 | 0.003257212 |
| -0.1099833 | cg18367578 | NNMT        | 11 | 0.000574102 |
| -0.1039621 | cg03250947 | NOTCH4      | 6  | 0.034796026 |
| -0.1096218 | cg21609584 | NPAS2       | 2  | 0.005095591 |
| -0.1031274 | cg06850660 | NPFF        | 12 | 0.016682258 |
| -0.1345044 | cg07813275 | NPL         | 1  | 0.006850057 |
| -0.1332488 | cg26647771 | NPR3        | 5  | 3.84E-05    |
| -0.1245867 | cg19321696 | NPS         | 10 | 0.019343683 |
| -0.1620025 | cg17826834 | NR2F2       | 15 | 0.036390997 |
| -0.149931  | cg02853418 | NR5A1       | 9  | 0.002372595 |
| -0.1301691 | cg23964820 | NRG1        | 8  | 0.045552659 |
| -0.153693  | cg17519477 | NRG3;NRG3;  | 10 | 0.002922015 |
| -0.1093663 | cg14157435 | NRP2;NRP2;f | 2  | 0.006015595 |
| -0.111438  | cg11114141 | NRP2;NRP2;f | 2  | 3.86E-05    |
| -0.1333771 | cg06285439 | NRP2;NRP2;f | 2  | 0.002083658 |
| -0.1068794 | cg19731541 | NRP2;NRP2;f | 2  | 0.009818796 |
| -0.1049968 | cg26422981 | NRP2;NRP2;f | 2  | 4.71E-07    |
| -0.1073776 | cg08623810 | NRXN2;NRXN  | 11 | 0.000135636 |
| -0.1505749 | cg00925339 | NT5E        | 6  | 0.021703122 |
| -0.1365672 | cg12445309 | NTM         | 11 | 0.001659997 |
| -0.1140473 | cg15370309 | NTN1        | 17 | 0.000372302 |
| -0.1334348 | cg17410313 | NUB1        | 7  | 0.001868748 |
| -0.1363422 | cg03287527 | NUBP1       | 16 | 0.00019509  |
| -0.1834655 | cg08306614 | NUDCD3      | 7  | 6.99E-06    |
| -0.170423  | cg25505880 | NXF1;NXF1   | 11 | 0.01225008  |
| -0.1573745 | cg18618206 | NXN         | 17 | 0.001180491 |
| -0.1507259 | cg25364619 | NXN         | 17 | 0.002405086 |

|            |            |              |    |             |
|------------|------------|--------------|----|-------------|
| -0.1467828 | cg19987768 | NXN          | 17 | 0.001946274 |
| -0.1361737 | cg08520443 | NXN          | 17 | 0.01121819  |
| -0.1351833 | cg18760502 | NXN          | 17 | 0.000191625 |
| -0.1328047 | cg26713109 | NXN          | 17 | 0.002205026 |
| -0.1250708 | cg24355809 | NXN          | 17 | 0.000335854 |
| -0.1239207 | cg13383734 | NXN          | 17 | 0.002598206 |
| -0.1199264 | cg08510234 | NXN          | 17 | 0.002478442 |
| -0.1168821 | cg22237425 | NXN          | 17 | 0.002916976 |
| -0.1156316 | cg27147785 | OAS2;OAS2;C  | 12 | 0.005908385 |
| -0.1118806 | cg15714223 | ODZ4         | 11 | 0.004039173 |
| -0.1115923 | cg09966895 | ODZ4         | 11 | 0.000110917 |
| -0.1098989 | cg04256834 | OPCML;OPCM   | 11 | 0.00044616  |
| -0.2363537 | cg12646029 | OR2H1        | 6  | 0.000308651 |
| -0.1450984 | cg02211735 | OR52A4       | 11 | 0.006165672 |
| -0.1433354 | cg23228178 | PADI4        | 1  | 0.002571641 |
| -0.1360048 | cg01923775 | PALLD;PALLD  | 4  | 0.000880091 |
| -0.1358435 | cg15542639 | PANX1        | 11 | 0.003178218 |
| -0.1346792 | cg24101009 | PANX1        | 11 | 7.57E-05    |
| -0.1270922 | cg19017553 | PARD3        | 10 | 0.002587583 |
| -0.1162549 | cg15459822 | PARD3B;PAR   | 2  | 0.041700585 |
| -0.1031848 | cg20765408 | PARP4        | 13 | 0.01272047  |
| -0.1022897 | cg01997270 | PARVB        | 22 | 0.020530085 |
| -0.1104197 | cg11163555 | PATZ1;PATZ1  | 22 | 0.026588839 |
| -0.1297102 | cg26558862 | PBRM1;PBRM   | 3  | 5.63E-05    |
| -0.1188575 | cg15690379 | PBRM1;PBRM   | 3  | 1.65E-05    |
| -0.1224017 | cg27149567 | PCBP3;PCBP3  | 21 | 0.007572043 |
| -0.1059367 | cg02006915 | PCDH24       | 5  | 4.51E-05    |
| -0.1597806 | cg25600472 | PCDHGA4;PC   | 5  | 0.000113598 |
| -0.1013941 | cg09075968 | PCID2;PCID2; | 13 | 3.48E-06    |
| -0.1593253 | cg14205864 | PCID2;PCID2; | 13 | 0.000116519 |
| -0.1199028 | cg27529037 | PCIF1        | 20 | 0.002635811 |
| -0.1125026 | cg14009504 | PCNX         | 14 | 0.010262974 |
| -0.1282261 | cg14453145 | PDCD1        | 2  | 0.000287921 |
| -0.1178444 | cg06160606 | PDE4B;PDE4I  | 1  | 0.000803324 |
| -0.1499789 | cg02711128 | PDE4C;PDE4C  | 19 | 0.006109814 |
| -0.11914   | cg10505902 | PDE4DIP;PDE  | 1  | 0.001398229 |
| -0.1173559 | cg06135425 | PDE7B        | 6  | 0.004486356 |
| -0.1123588 | cg24777101 | PDE7B        | 6  | 0.000261422 |
| -0.1075225 | cg22935422 | PDE7B        | 6  | 9.91E-06    |
| -0.1029876 | cg20070933 | PDGFA;PDGF   | 7  | 0.002076945 |
| -0.1532623 | cg05892024 | PDGFA;PDGF   | 7  | 0.023604176 |
| -0.1709079 | cg24240349 | PDGFA;PDGF   | 7  | 0.002406298 |
| -0.1359449 | cg20063728 | PDGFA;PDGF   | 7  | 4.42E-05    |
| -0.1224816 | cg15957807 | PDGFC        | 4  | 0.000766326 |
| -0.1089502 | cg08284233 | PDILT        | 16 | 0.045232082 |
| -0.1126493 | cg13242090 | PDLIM1       | 10 | 0.016684728 |

|            |            |              |    |             |
|------------|------------|--------------|----|-------------|
| -0.1196682 | cg02484352 | PDLIM4;PDLI  | 5  | 6.93E-05    |
| -0.1317179 | cg00653870 | PDLIM7;PDLI  | 5  | 1.04E-05    |
| -0.1311414 | cg20210051 | PDZRN4;PDZ   | 12 | 0.033627689 |
| -0.2137924 | cg09026722 | PEAR1        | 1  | 0.000354599 |
| -0.1236029 | cg17468855 | PEX10;RER1;  | 1  | 0.000355121 |
| -0.1131031 | cg07875121 | PFDN1        | 5  | 0.000297797 |
| -0.1125574 | cg27355501 | PFDN6;WDR4   | 6  | 0.009390783 |
| -0.1294739 | cg08994060 | PFKFB3       | 10 | 0.016046382 |
| -0.1428938 | cg26262157 | PFKFB3       | 10 | 0.034844488 |
| -0.1227867 | cg05014727 | PFKFB3       | 10 | 0.020787632 |
| -0.1135591 | cg17185622 | PGCP         | 8  | 0.001302932 |
| -0.1138879 | cg22669656 | PGS1         | 17 | 0.00028204  |
| -0.1069228 | cg09063835 | PHACTR3      | 20 | 0.00825849  |
| -0.1000293 | cg25631489 | PHC3         | 3  | 0.009033992 |
| -0.1393721 | cg16213217 | PHF11;PHF11  | 13 | 0.00015813  |
| -0.1170597 | cg05476182 | PHF15        | 5  | 2.39E-06    |
| -0.1130652 | cg21723559 | PIGT         | 20 | 0.00225296  |
| -0.1968319 | cg15021292 | PIK3R1       | 5  | 0.044705624 |
| -0.1270942 | cg14062643 | PIP5KL1;PIP5 | 9  | 4.27E-07    |
| -0.1727494 | cg19910327 | PIPSL        | 10 | 0.000383026 |
| -0.1185447 | cg05171952 | PITX1        | 5  | 0.048018536 |
| -0.1112363 | cg09781994 | PITX2;PITX2  | 4  | 0.032570554 |
| -0.1115501 | cg03184290 | PITX2;PITX2  | 4  | 0.037475758 |
| -0.1032868 | cg19304088 | PITX2;PITX2  | 4  | 0.01593518  |
| -0.2067889 | cg21726372 | PITX2;PITX2; | 4  | 0.032957179 |
| -0.1832353 | cg12858593 | PIWIL2;PIWIL | 8  | 0.021287665 |
| -0.1350732 | cg24960118 | PKHD1;PKHD   | 6  | 0.000587378 |
| -0.1096921 | cg18981758 | PLA2G6;PLA2  | 22 | 0.000491607 |
| -0.1512694 | cg09920804 | PLAT;PLAT    | 8  | 0.001333438 |
| -0.1265655 | cg17168630 | PLAUR;PLAUI  | 19 | 0.02497556  |
| -0.103022  | cg01846046 | PLCB3        | 11 | 0.000265781 |
| -0.1024503 | cg12636785 | PLD5         | 1  | 0.002224784 |
| -0.1531565 | cg02861056 | PLEK;PLEK    | 2  | 0.02542234  |
| -0.1210685 | cg13060970 | PLEK;PLEK    | 2  | 0.013828747 |
| -0.1649248 | cg10812236 | PLEK;PLEK    | 2  | 0.048967347 |
| -0.1317373 | cg04872689 | PLEK;PLEK    | 2  | 0.036319968 |
| -0.1084841 | cg02556345 | PLEKHA1;PLE  | 10 | 0.001198195 |
| -0.1055608 | cg06349754 | PLEKHG4;PLE  | 16 | 5.97E-05    |
| -0.1046094 | cg05155047 | PLEKHG4B     | 5  | 0.005939186 |
| -0.1233814 | cg19774351 | PLEKHG6;PLE  | 12 | 0.000152447 |
| -0.125538  | cg07533239 | PLEKHG6;PLE  | 12 | 0.009102843 |
| -0.1432935 | cg11524454 | PLEKHG7      | 12 | 0.004168179 |
| -0.1308349 | cg27583604 | PLK3         | 1  | 0.000791053 |
| -0.1202546 | cg24291309 | PLOD2;PLOD   | 3  | 0.000684396 |
| -0.1224966 | cg05652225 | PLXDC1       | 17 | 0.0018195   |
| -0.1554978 | cg02895948 | PLXNA2       | 1  | 1.85E-06    |

|            |            |             |    |             |
|------------|------------|-------------|----|-------------|
| -0.1340808 | cg21144009 | PLXNA2      | 1  | 0.000339035 |
| -0.1310387 | cg01117384 | PMEPA1;PMI  | 20 | 0.001471131 |
| -0.1066893 | cg00587342 | PMM1        | 22 | 0.004445696 |
| -0.1515355 | cg27018309 | PMM2        | 16 | 0.000106516 |
| -0.1530927 | cg25734089 | PNMAL1;PNM  | 19 | 1.85E-05    |
| -0.121912  | cg22027204 | PNPLA1;PNP  | 6  | 0.047832617 |
| -0.17598   | cg17921363 | POFUT2;POF  | 21 | 0.046049461 |
| -0.1425473 | cg05673882 | POLK        | 5  | 0.00572135  |
| -0.1319279 | cg16509336 | POLR3A      | 10 | 0.012114382 |
| -0.1299892 | cg06738169 | POP4;POP4   | 19 | 0.000571267 |
| -0.1286874 | cg24966958 | POPDC2      | 3  | 0.008638995 |
| -0.1038828 | cg17311022 | POPDC2      | 3  | 0.004293232 |
| -0.1632529 | cg10955995 | PPARGC1A    | 4  | 0.001707833 |
| -0.1574823 | cg01192554 | PPFIA1      | 11 | 0.001691719 |
| -0.1077417 | cg24376793 | PPP1R12B;PF | 1  | 9.30E-05    |
| -0.1375149 | cg03478610 | PPP2R3A     | 3  | 0.010631309 |
| -0.1645797 | cg19948457 | PPP3CA;PPP3 | 4  | 0.049179277 |
| -0.1014126 | cg19064302 | PRDM1       | 6  | 0.0077635   |
| -0.1000174 | cg03527274 | PRDM16;PRC  | 1  | 0.028911322 |
| -0.1585329 | cg24256745 | PRDM16;PRC  | 1  | 0.016988039 |
| -0.1250081 | cg17861161 | PRDM16;PRC  | 1  | 0.001888594 |
| -0.1362479 | cg24878051 | PRDM16;PRC  | 1  | 0.011922837 |
| -0.1166135 | cg04974499 | PRDM16;PRC  | 1  | 1.44E-05    |
| -0.1235566 | cg01647724 | PRDM16;PRC  | 1  | 0.000634757 |
| -0.1791402 | cg27544405 | PRDM2;PRDM  | 1  | 0.001968733 |
| -0.1791254 | cg09560763 | PRDM8       | 4  | 0.003644673 |
| -0.1651754 | cg20584157 | PRICKLE2    | 3  | 0.007740258 |
| -0.158671  | cg07650392 | PRICKLE2    | 3  | 0.042253061 |
| -0.1249049 | cg03567939 | PRKAG2;PRK  | 7  | 3.24E-05    |
| -0.1132986 | cg08265392 | PRKAG2;PRK  | 7  | 0.001456402 |
| -0.1058379 | cg06728793 | PRKAR1B;PRI | 7  | 0.041408501 |
| -0.101242  | cg10117599 | PRKAR1B;PRI | 7  | 0.037327012 |
| -0.2075793 | cg04733951 | PRKCA       | 17 | 0.002477677 |
| -0.1081491 | cg04961042 | PRKD1       | 14 | 0.02606354  |
| -0.1624187 | cg18594724 | PRKG1;PRKG  | 10 | 0.008000206 |
| -0.1208182 | cg02026306 | PRMT1;PRMT  | 19 | 3.33E-06    |
| -0.1009355 | cg19407392 | PRNP;PRNP;F | 20 | 5.35E-05    |
| -0.107313  | cg04286737 | PRNP;PRNP;F | 20 | 1.01E-05    |
| -0.1015947 | cg14055655 | PRR12       | 19 | 4.52E-05    |
| -0.1322167 | cg02630628 | PRR12       | 19 | 0.003886032 |
| -0.1133162 | cg05348216 | PRSS16      | 6  | 0.012529473 |
| -0.1001679 | cg17522935 | PRX;PRX     | 19 | 7.30E-05    |
| -0.1008176 | cg25875163 | PSCA        | 8  | 0.002062201 |
| -0.1794551 | cg18369034 | PTGDR       | 14 | 0.00025272  |
| -0.1546678 | cg16060930 | PTGFRN      | 1  | 0.045083249 |
| -0.1296238 | cg14176942 | PTGS1;PTGS1 | 9  | 0.018603039 |

|            |            |             |    |             |
|------------|------------|-------------|----|-------------|
| -0.1286412 | cg11641102 | PTK2B;PTK2E | 8  | 0.012294274 |
| -0.1249978 | cg20386404 | PTPN14      | 1  | 0.027982234 |
| -0.1241436 | cg07986469 | PTPRE       | 10 | 0.013835322 |
| -0.1099116 | cg00238353 | PTPRE       | 10 | 0.012269102 |
| -0.1183929 | cg19688761 | PTPRE       | 10 | 0.028724023 |
| -0.1002069 | cg07215975 | PTPRE       | 10 | 0.00638741  |
| -0.1542484 | cg00974944 | PTPRG       | 3  | 0.005095886 |
| -0.1491487 | cg18411660 | PTPRN2;PTPF | 7  | 0.000312949 |
| -0.1419814 | cg22128328 | PTPRN2;PTPF | 7  | 0.012383621 |
| -0.1168386 | cg00235442 | PTPRN2;PTPF | 7  | 0.011740381 |
| -0.1079311 | cg09365094 | PTPRN2;PTPF | 7  | 0.000314632 |
| -0.1057829 | cg26075259 | PTPRN2;PTPF | 7  | 0.010424711 |
| -0.1948815 | cg22950899 | PTPRS;PTPRS | 19 | 0.003306987 |
| -0.1283408 | cg08462941 | PTPRS;PTPRS | 19 | 0.000549295 |
| -0.1141375 | cg00499837 | PVRL1;PVRL1 | 11 | 0.000634118 |
| -0.1340004 | cg26753608 | PVT1        | 8  | 0.001858552 |
| -0.1225939 | cg08216099 | PXDN        | 2  | 4.34E-05    |
| -0.1669565 | cg23018448 | QTRT1       | 19 | 0.026387782 |
| -0.1376764 | cg10211776 | RAB11FIP1;R | 8  | 0.018258516 |
| -0.1218589 | cg02395396 | RAB3B       | 1  | 1.52E-05    |
| -0.1217147 | cg17546817 | RAB3C       | 5  | 0.025028524 |
| -0.1228848 | cg07437024 | RAB40C      | 16 | 0.002930956 |
| -0.1050369 | cg25603108 | RAD51L1;RAI | 14 | 0.014000275 |
| -0.1660195 | cg00715197 | RAD51L1;RAI | 14 | 0.000116018 |
| -0.2077738 | cg19979896 | RAET1E      | 6  | 0.009956236 |
| -0.2042445 | cg06205333 | RAP1A;RAP1  | 1  | 0.046202694 |
| -0.1463711 | cg03727673 | RAP1GAP;RA  | 1  | 0.004312181 |
| -0.1461022 | cg05492387 | RAP1GDS1;R  | 4  | 0.005350326 |
| -0.1192426 | cg14576291 | RAPGEF1;RAI | 9  | 0.001184203 |
| -0.1074645 | cg21330727 | RAPGEFL1    | 17 | 3.51E-05    |
| -0.1535349 | cg23518541 | RARB;RARB   | 3  | 0.002826224 |
| -0.1079344 | cg14986890 | RARRES1;RAI | 3  | 0.00035991  |
| -0.154696  | cg21521758 | RARRES2     | 7  | 0.001394535 |
| -0.1159648 | cg13643184 | RASA3       | 13 | 0.002641526 |
| -0.1068019 | cg16087432 | RASA3       | 13 | 0.001553122 |
| -0.1009044 | cg04402088 | RASA3       | 13 | 1.45E-05    |
| -0.1551651 | cg10976218 | RASA3       | 13 | 0.009742261 |
| -0.1004068 | cg16046375 | RASA3       | 13 | 0.034280915 |
| -0.1347058 | cg03349935 | RASL12      | 15 | 0.000194859 |
| -0.1481058 | cg10992219 | RB1CC1;RB1C | 8  | 0.022283539 |
| -0.1197163 | cg10582795 | RBMS1;RBM!  | 2  | 0.006275632 |
| -0.1119622 | cg16258657 | RBMS3;RBM!  | 3  | 0.00099782  |
| -0.100239  | cg19083007 | RCAN2       | 6  | 0.011957456 |
| -0.1438259 | cg26017874 | REG4;REG4   | 1  | 0.002187688 |
| -0.1293895 | cg24021846 | RELN;RELN   | 7  | 0.025115349 |
| -0.118823  | cg13474998 | RFT1        | 3  | 0.00034221  |

|            |            |             |    |             |
|------------|------------|-------------|----|-------------|
| -0.1036888 | cg11184109 | RFT1        | 3  | 0.022662418 |
| -0.1024713 | cg17851046 | RFX4        | 12 | 0.03098425  |
| -0.1129022 | cg24896460 | RGNEF       | 5  | 0.011044023 |
| -0.1664125 | cg06357908 | RGS1        | 1  | 0.012340073 |
| -0.1038619 | cg15611912 | RGS10       | 10 | 0.009209982 |
| -0.1215142 | cg18944752 | RGS12;RGS1  | 4  | 0.000182719 |
| -0.1227943 | cg05111779 | RGS6        | 14 | 0.013864729 |
| -0.1117212 | cg12412775 | RHCE;RHCE;F | 1  | 1.13E-05    |
| -0.1213641 | cg06674117 | RHOT1;RHOT  | 17 | 0.000102846 |
| -0.1208141 | cg06002952 | RICS        | 11 | 0.000119306 |
| -0.160895  | cg03512414 | RIN2        | 20 | 0.000786071 |
| -0.1556586 | cg15487725 | RNASE8      | 14 | 0.034606009 |
| -0.1352122 | cg01715025 | RNF115      | 1  | 0.007428987 |
| -0.1021804 | cg03191504 | RNF149      | 2  | 0.000424511 |
| -0.1105893 | cg03577157 | RNU5E;SSBP  | 5  | 0.037219187 |
| -0.1034989 | cg03572680 | ROBO4       | 11 | 0.001089496 |
| -0.1104364 | cg06100161 | RORA        | 15 | 0.033865242 |
| -0.1281206 | cg06191571 | RPL21P44    | 4  | 9.28E-06    |
| -0.1093152 | cg03849851 | RPS6KA2;RPS | 6  | 8.99E-05    |
| -0.1433699 | cg24667756 | RPTOR;RPTO  | 17 | 0.005570396 |
| -0.1176466 | cg26932790 | RRN3P1      | 16 | 1.50E-05    |
| -0.1072054 | cg12132508 | RRP15       | 1  | 0.000733666 |
| -0.2074416 | cg24249648 | RSPH3       | 6  | 9.71E-05    |
| -0.1166225 | cg08432509 | RTEL1;RTEL1 | 20 | 2.25E-05    |
| -0.1002035 | cg06586763 | RUNDC2C     | 16 | 0.007016496 |
| -0.1175875 | cg05973398 | RUNX1       | 21 | 0.033343969 |
| -0.1066895 | cg15091747 | RUNX1       | 21 | 0.011006084 |
| -0.1117455 | cg08443845 | RUNX1       | 21 | 0.006155725 |
| -0.1676821 | cg13030790 | RUNX1;RUN   | 21 | 0.000502932 |
| -0.1063143 | cg01519261 | RUNX1;RUN   | 21 | 0.007158023 |
| -0.1152767 | cg04915566 | RUNX1;RUN   | 21 | 0.004617799 |
| -0.1842887 | cg16943019 | RYK;RYK     | 3  | 0.000704546 |
| -0.1469336 | cg13445177 | S100A10     | 1  | 0.000100449 |
| -0.1228502 | cg18273417 | S100A4;S100 | 1  | 0.001910105 |
| -0.1060414 | cg13091627 | S100A4;S100 | 1  | 0.020277761 |
| -0.1036877 | cg24691453 | S100A4;S100 | 1  | 0.007943708 |
| -0.1339742 | cg01411912 | S100A4;S100 | 1  | 0.000307159 |
| -0.109968  | cg26303281 | S100A5      | 1  | 0.003399486 |
| -0.1205936 | cg00002646 | S100A5      | 1  | 8.93E-05    |
| -0.1096191 | cg21217846 | S100A5      | 1  | 0.000904598 |
| -0.1406894 | cg15484375 | SAA1;SAA1   | 11 | 0.047017397 |
| -0.1562234 | cg14921326 | SAMD12      | 8  | 0.00228189  |
| -0.1349971 | cg17018082 | SAMD12;SAM  | 8  | 0.031140684 |
| -0.121076  | cg17069828 | SAMD12;SAM  | 8  | 5.91E-05    |
| -0.1407686 | cg15473329 | SAMD4B      | 19 | 2.15E-05    |
| -0.1738909 | cg20938708 | SAP30BP     | 17 | 0.000586881 |

|            |            |              |    |             |
|------------|------------|--------------|----|-------------|
| -0.1779802 | cg16640450 | SASH1        | 6  | 0.0150566   |
| -0.1962697 | cg09680149 | SCNN1A       | 12 | 0.001043048 |
| -0.1186685 | cg03033182 | SCOC         | 4  | 0.000843463 |
| -0.1276365 | cg06968788 | SDC4P        | 22 | 0.000465399 |
| -0.1155359 | cg21482176 | SDCCAG10     | 5  | 0.012142941 |
| -0.1006951 | cg00295780 | SDCCAG8      | 1  | 0.021842455 |
| -0.1602088 | cg16250868 | SDK1         | 7  | 0.011933901 |
| -0.1463573 | cg27262821 | SEC1         | 19 | 1.33E-05    |
| -0.1731044 | cg10167316 | SEC61A1      | 3  | 0.000719259 |
| -0.1249112 | cg24599709 | SELI         | 2  | 0.031484549 |
| -0.1380638 | cg05343289 | SELP         | 1  | 1.07E-05    |
| -0.1399139 | cg11344744 | SEMA4C       | 2  | 0.002454015 |
| -0.1072713 | cg01477253 | SEMA4F       | 2  | 0.001022547 |
| -0.1481727 | cg17679604 | SEMA6A       | 5  | 0.024583702 |
| -0.1067945 | cg05474605 | SEPP1;SEPP1  | 5  | 0.033782185 |
| -0.1340257 | cg04548336 | SEPT9        | 17 | 0.047553443 |
| -0.1190556 | cg12098949 | SEPT9;SEPT9  | 17 | 0.003669024 |
| -0.2925689 | cg03909356 | SEPT9;SEPT9  | 17 | 0.000463451 |
| -0.2362521 | cg14773822 | SEPT9;SEPT9  | 17 | 0.006366548 |
| -0.2245072 | cg01292299 | SERGEF       | 11 | 0.000233842 |
| -0.1212322 | cg01231381 | SESTD1       | 2  | 0.01061224  |
| -0.1121254 | cg00864954 | SF3B3        | 16 | 3.13E-05    |
| -0.12167   | cg16536739 | SFRP5        | 10 | 8.22E-05    |
| -0.1053085 | cg20054157 | SFTA1P       | 10 | 0.014276696 |
| -0.1346863 | cg11059873 | SGCD;SGCD;S  | 5  | 2.26E-06    |
| -0.1177984 | cg09404376 | SGK1;SGK1    | 6  | 0.018832671 |
| -0.1108743 | cg08640361 | SGK1;SGK1;S  | 6  | 0.004470123 |
| -0.1060791 | cg01464186 | SGMS1        | 10 | 0.000357215 |
| -0.1933031 | cg19189864 | SH3PXD2A     | 10 | 0.019738949 |
| -0.1020367 | cg23786152 | SH3PXD2A     | 10 | 0.000804719 |
| -0.1911807 | cg07168060 | SH3PXD2A     | 10 | 7.05E-06    |
| -0.1420515 | cg06888746 | SH3PXD2A     | 10 | 0.011052566 |
| -0.1165702 | cg18135683 | SH3PXD2B     | 5  | 0.015199153 |
| -0.1000861 | cg16572224 | SH3PXD2B     | 5  | 0.001858092 |
| -0.176019  | cg05168015 | SH3PXD2B     | 5  | 0.003064742 |
| -0.1359096 | cg07576525 | SHANK3       | 22 | 0.000336124 |
| -0.117844  | cg04503593 | SHROOM3      | 4  | 0.002293192 |
| -0.1178286 | cg11615509 | SHROOM3      | 4  | 0.009142192 |
| -0.1150605 | cg27417997 | SHROOM3;SI   | 4  | 0.025434556 |
| -0.1697962 | cg12013571 | SIGLEC12     | 19 | 0.040564623 |
| -0.1876481 | cg10682155 | SIM2         | 21 | 0.012768493 |
| -0.1365046 | cg14972228 | SIPA1L3      | 19 | 1.03E-05    |
| -0.1102293 | cg07862461 | SIRPA;SIRPA; | 20 | 0.000166873 |
| -0.1113118 | cg09936839 | SIRT6;ANKRC  | 19 | 1.57E-05    |
| -0.1769927 | cg22845912 | SLA;TG;SLA;S | 8  | 0.00040578  |
| -0.1477058 | cg04275881 | SLAMF8       | 1  | 0.037952891 |



|            |            |             |    |             |
|------------|------------|-------------|----|-------------|
| -0.1431696 | cg06764092 | SLAMF8;SLAI | 1  | 0.034083429 |
| -0.1469429 | cg21301505 | SLAMF8;SLAI | 1  | 0.007836022 |
| -0.1151619 | cg07625783 | SLAMF8;SLAI | 1  | 0.006675243 |
| -0.108111  | cg26417912 | SLAMF9;SLAI | 1  | 0.000360517 |
| -0.1290636 | cg20872692 | SLC11A2     | 12 | 0.010088769 |
| -0.1065174 | cg00087274 | SLC12A8     | 3  | 0.000205978 |
| -0.1348818 | cg13844463 | SLC1A2      | 11 | 0.035112979 |
| -0.1106319 | cg25475999 | SLC1A2      | 11 | 0.000458663 |
| -0.1196093 | cg21818891 | SLC1A2      | 11 | 0.000416953 |
| -0.1143829 | cg07254421 | SLC1A3;SLC1 | 5  | 0.013668083 |
| -0.1226792 | cg00532936 | SLC1A7      | 1  | 0.009580074 |
| -0.2248931 | cg26137286 | SLC22A18;SL | 11 | 0.032557882 |
| -0.1144632 | cg16087826 | SLC22A4     | 5  | 0.001710793 |
| -0.1133046 | cg19040266 | SLC22A5     | 5  | 0.009498874 |
| -0.1409361 | cg16547579 | SLC23A2;SLC | 20 | 0.004529848 |
| -0.1932816 | cg19811934 | SLC24A4;SLC | 14 | 0.021500518 |
| -0.1031126 | cg16267322 | SLC24A4;SLC | 14 | 4.01E-05    |
| -0.1089059 | cg20554277 | SLC25A21;SL | 14 | 0.02261037  |
| -0.1570367 | cg26801445 | SLC25A37    | 8  | 0.001554325 |
| -0.1344827 | cg20207276 | SLC25A37    | 8  | 0.000543212 |
| -0.1276973 | cg07659624 | SLC25A37    | 8  | 7.53E-05    |
| -0.1227286 | cg14646244 | SLC26A4;LOC | 7  | 0.004182972 |
| -0.1201084 | cg12302621 | SLC28A1;SLC | 15 | 0.010411738 |
| -0.1121932 | cg21145248 | SLC34A1;SLC | 5  | 0.003399486 |
| -0.1065422 | cg08454563 | SLC35E4     | 22 | 0.000266325 |
| -0.1054857 | cg27406472 | SLC38A10;SL | 17 | 3.20E-05    |
| -0.1605776 | cg13990980 | SLC39A9     | 14 | 7.21E-07    |
| -0.2102929 | cg12178904 | SLC45A3     | 1  | 0.002378417 |
| -0.1812132 | cg04658357 | SLC5A10;SLC | 17 | 9.99E-07    |
| -0.1084436 | cg00472281 | SLC6A19     | 5  | 0.010635994 |
| -0.1013246 | cg10586672 | SLC6A6;SLC6 | 3  | 0.001679478 |
| -0.1692135 | cg15155209 | SLC6A6;SLC6 | 3  | 3.20E-05    |
| -0.1598297 | cg15454698 | SLC6A6;SLC6 | 3  | 0.040507986 |
| -0.1530738 | cg03987842 | SLC7A6;SLC7 | 16 | 0.000350779 |
| -0.1497487 | cg19015847 | SLC8A1;SLC8 | 2  | 0.001263632 |
| -0.1366197 | cg08780166 | SLC8A1;SLC8 | 2  | 5.08E-05    |
| -0.1148056 | cg20816789 | SLC9A1      | 1  | 3.06E-05    |
| -0.1081287 | cg13408795 | SLC9A9      | 3  | 0.045215402 |
| -0.1276243 | cg27132471 | SLCO3A1;SLC | 15 | 0.001548324 |
| -0.1040638 | cg26168643 | SLITRK5     | 13 | 0.025232497 |
| -0.1026881 | cg16476427 | SLN         | 11 | 0.00091675  |
| -0.1029373 | cg23480341 | SLPI        | 20 | 0.015199968 |
| -0.1135119 | cg12379307 | SMPDL3A     | 6  | 0.005487644 |
| -0.1470968 | cg27601574 | SMTN;SMTN   | 22 | 7.24E-05    |
| -0.1350355 | cg10153733 | SMU1        | 9  | 0.033374264 |
| -0.1279074 | cg11667301 | SNORD70;NC  | 2  | 0.003178162 |

|            |            |             |    |             |
|------------|------------|-------------|----|-------------|
| -0.1913101 | cg22208536 | SNX25       | 4  | 0.006749349 |
| -0.1348757 | cg03204907 | SNX29       | 16 | 0.006652011 |
| -0.1304665 | cg17507897 | SNX5;SNORD  | 20 | 0.010512471 |
| -0.1391047 | cg25804773 | SORBS1;SORI | 10 | 0.00052105  |
| -0.1385676 | cg01582937 | SORBS3      | 8  | 0.001644819 |
| -0.1387529 | cg18431297 | SORCS2      | 4  | 0.039031849 |
| -0.1896563 | cg14239983 | SORL1       | 11 | 0.000833457 |
| -0.1301064 | cg11586591 | SORL1       | 11 | 0.003856232 |
| -0.1277884 | cg05075579 | SORL1       | 11 | 0.00628498  |
| -0.1160376 | cg17510957 | SORL1       | 11 | 0.0150566   |
| -0.1169946 | cg06360527 | SOX15       | 17 | 3.88E-05    |
| -0.1142213 | cg11606261 | SP1;SP1     | 12 | 0.025190479 |
| -0.1032142 | cg05730975 | SPAG16      | 2  | 0.000476674 |
| -0.1139357 | cg03394909 | SPEG        | 2  | 6.36E-05    |
| -0.1667915 | cg22862112 | SPINLW1;SPI | 20 | 0.00270059  |
| -0.1240845 | cg05944260 | SPOCD1      | 1  | 0.012922682 |
| -0.1056447 | cg12401953 | SPOCK1      | 5  | 0.000114417 |
| -0.1262949 | cg03943115 | SPRR2D      | 1  | 0.030249586 |
| -0.1341667 | cg10929758 | SPTBN1;SPT  | 2  | 0.000123303 |
| -0.1091928 | cg21313830 | SQRDL       | 15 | 2.22E-05    |
| -0.1073182 | cg01668352 | SRGAP1      | 12 | 0.008956868 |
| -0.1211537 | cg10165689 | SSBP3;SSBP3 | 1  | 0.03427285  |
| -0.1169329 | cg13909661 | SSPN;SSPN   | 12 | 1.39E-05    |
| -0.1087341 | cg09586924 | ST14        | 11 | 0.015462241 |
| -0.1164334 | cg22110158 | ST14        | 11 | 0.00024126  |
| -0.1295069 | cg00640719 | ST3GAL2     | 16 | 1.41E-05    |
| -0.1195319 | cg14624546 | ST5;ST5;ST5 | 11 | 0.001055221 |
| -0.1281271 | cg08710564 | ST5;ST5;ST5 | 11 | 0.000381663 |
| -0.120001  | cg08726522 | ST5;ST5;ST5 | 11 | 0.013779776 |
| -0.1014294 | cg23195547 | ST5;ST5;ST5 | 11 | 0.001842738 |
| -0.102739  | cg16777510 | STAT5A      | 17 | 0.046382435 |
| -0.1203043 | cg26904169 | STEAP2;STE  | 7  | 0.008348925 |
| -0.110464  | cg04439862 | STIM2;STIM2 | 4  | 0.027795451 |
| -0.120659  | cg00913954 | STK40       | 1  | 3.24E-05    |
| -0.1076686 | cg03328299 | STOML1      | 15 | 1.05E-07    |
| -0.1120755 | cg12253931 | STX18       | 4  | 0.004449093 |
| -0.1288203 | cg02770724 | STX1A;STX1A | 7  | 0.000154325 |
| -0.1169296 | cg01712428 | STX1A;STX1A | 7  | 0.000885129 |
| -0.1146243 | cg01225788 | SULF1;SULF1 | 8  | 0.001333438 |
| -0.1066757 | cg18110822 | SUMF1;SUM   | 3  | 0.010859514 |
| -0.1036168 | cg00850552 | SUMO3       | 21 | 3.29E-05    |
| -0.1288068 | cg25743622 | SUSD4       | 1  | 0.003416044 |
| -0.1085    | cg23601468 | SYN3;SYN3;T | 22 | 0.004291913 |
| -0.1980566 | cg09516930 | SYNE1;SYNE1 | 6  | 0.005864775 |
| -0.1364977 | cg12002139 | SYNJ2       | 6  | 0.001635745 |
| -0.106513  | cg00089453 | SYNPO;SYNP  | 5  | 0.001126381 |

|            |            |               |    |             |
|------------|------------|---------------|----|-------------|
| -0.1241446 | cg11569478 | SYNPO2;SYN    | 4  | 9.47E-05    |
| -0.1071801 | cg20515580 | SYT12         | 11 | 0.028069865 |
| -0.1453859 | cg15731317 | SYTL2;SYTL2;  | 11 | 0.021158277 |
| -0.1314875 | cg11065271 | SYTL3         | 6  | 0.010866365 |
| -0.1236881 | cg02345321 | TACC1         | 8  | 0.00055022  |
| -0.1029102 | cg16652855 | TACC2;TACC;   | 10 | 0.001583247 |
| -0.133911  | cg09700337 | TAOK3         | 12 | 0.0145843   |
| -0.1394834 | cg13693517 | TASP1         | 20 | 0.025794221 |
| -0.164974  | cg20834178 | TBC1D14;TBC   | 4  | 0.000586686 |
| -0.1188829 | cg15437231 | TBC1D15;TBC   | 12 | 1.87E-05    |
| -0.1195522 | cg08455089 | TBC1D22B      | 6  | 0.000100711 |
| -0.1098309 | cg15740507 | TBC1D23       | 3  | 0.007733218 |
| -0.127269  | cg20893936 | TBC1D8        | 2  | 0.001774731 |
| -0.1779619 | cg19016694 | TBCD          | 17 | 0.005649433 |
| -0.1499453 | cg03683087 | TCF7L2;TCF7   | 10 | 0.024542251 |
| -0.1259415 | cg24032269 | TCOF1;TCOF:   | 5  | 0.00022332  |
| -0.1217874 | cg03709468 | TDO2          | 4  | 6.99E-06    |
| -0.1156921 | cg02097120 | TDRD10;TDR    | 1  | 1.84E-05    |
| -0.1768962 | cg09861057 | TDRD10;TDR    | 1  | 0.000119091 |
| -0.1242866 | cg15805337 | TEAD1         | 11 | 0.003182632 |
| -0.1117154 | cg21198586 | TEAD1         | 11 | 3.91E-06    |
| -0.1067233 | cg16574643 | TERT;TERT     | 5  | 0.013355487 |
| -0.1163511 | cg19208681 | TEX14;RAD5:   | 17 | 0.037667108 |
| -0.1712804 | cg15339605 | TFEC;TFEC;TF  | 7  | 0.033598593 |
| -0.1129533 | cg11947187 | TG            | 8  | 0.002431222 |
| -0.1209857 | cg11883141 | TG;SLA;SLA    | 8  | 0.00395003  |
| -0.1029588 | cg15735736 | TGFB1         | 19 | 0.007375179 |
| -0.1563233 | cg05838308 | TGFB1         | 5  | 0.002924916 |
| -0.146213  | cg21583694 | TGFB1         | 5  | 0.001585583 |
| -0.1121618 | cg25769732 | TGFBR3        | 1  | 0.015622526 |
| -0.103103  | cg00857921 | TGFBR3        | 1  | 0.035375568 |
| -0.1101248 | cg20629315 | THADA;THAC    | 2  | 0.022522267 |
| -0.1014835 | cg23105419 | THADA;THAC    | 2  | 0.003502124 |
| -0.1116682 | cg03495053 | THBS2         | 6  | 2.39E-05    |
| -0.1167768 | cg02255983 | THOP1         | 19 | 4.82E-05    |
| -0.1358889 | cg19763108 | THRB;THRB;T   | 3  | 0.002641526 |
| -0.1165318 | cg07536328 | TIMM23        | 10 | 0.000981512 |
| -0.1572876 | cg00466492 | TIMM44;CTX    | 19 | 0.008861342 |
| -0.1378052 | cg14255824 | TJP2;TJP2;TJF | 9  | 0.008293181 |
| -0.1074575 | cg02934719 | TK2           | 16 | 0.002114719 |
| -0.1329187 | cg20956411 | TLK1          | 2  | 0.0001366   |
| -0.1249076 | cg22839308 | TLR1          | 4  | 0.00627354  |
| -0.1514938 | cg14578677 | TLR6          | 4  | 0.008878201 |
| -0.1543164 | cg13314965 | TM4SF19       | 3  | 0.026120798 |
| -0.1247657 | cg06285909 | TMCO7         | 16 | 0.000793051 |
| -0.1108633 | cg06507678 | TMED7-TICAI   | 5  | 0.008504995 |

|            |            |             |    |             |
|------------|------------|-------------|----|-------------|
| -0.1162753 | cg27641628 | TMEM140     | 7  | 0.046911778 |
| -0.1147985 | cg07972322 | TMEM140;TM  | 7  | 0.02606354  |
| -0.128443  | cg15139596 | TMEM149     | 19 | 0.031806918 |
| -0.1076452 | cg04232128 | TMEM173     | 5  | 0.002477677 |
| -0.1321115 | cg04969878 | TMEM19      | 12 | 0.017030779 |
| -0.1158728 | cg02782634 | TMEM49      | 17 | 0.000952637 |
| -0.1280821 | cg01409343 | TMEM49      | 17 | 0.000280167 |
| -0.1183872 | cg14032089 | TMEM49;MII  | 17 | 0.001883678 |
| -0.1104732 | cg19897979 | TMEM50A     | 1  | 0.000128162 |
| -0.2140792 | cg10054641 | TMEM71;TM   | 8  | 0.01687009  |
| -0.1732848 | cg23313885 | TMEM71;TM   | 8  | 0.00933569  |
| -0.1189896 | cg14288903 | TMEM95      | 17 | 0.020787632 |
| -0.1193816 | cg13672106 | TMEM99      | 17 | 0.002357967 |
| -0.100788  | cg26673722 | TMPRSS11A;  | 4  | 0.035993669 |
| -0.112964  | cg19974120 | TMPRSS2;TV  | 21 | 2.22E-05    |
| -0.1038546 | cg17318719 | TMPRSS4;TV  | 11 | 0.019899079 |
| -0.1044164 | cg06488678 | TMPRSS9     | 19 | 0.000307206 |
| -0.1362302 | cg04264002 | TNFAIP2;TNF | 14 | 0.000153891 |
| -0.1290279 | cg02233197 | TNFAIP8L3   | 15 | 0.01557142  |
| -0.1053811 | cg24427243 | TNFRSF8     | 1  | 0.017710204 |
| -0.1044057 | cg18025409 | TNFRSF9     | 1  | 0.015998899 |
| -0.1242849 | cg14153654 | TNFRSF9     | 1  | 0.008534468 |
| -0.1161977 | cg02099194 | TNFSF11;TNF | 13 | 5.60E-05    |
| -0.165862  | cg00741986 | TNIP2;TNIP2 | 4  | 0.000753173 |
| -0.2175367 | cg02481714 | TNRC6B      | 22 | 0.022911595 |
| -0.1757678 | cg12338137 | TNS1        | 2  | 0.005909596 |
| -0.1204968 | cg03204140 | TNXB        | 6  | 0.001454598 |
| -0.1108119 | cg04344233 | TNXB        | 6  | 0.000617911 |
| -0.1004336 | cg24504289 | TNXB        | 6  | 1.23E-05    |
| -0.1130011 | cg11606877 | TNXB        | 6  | 0.038731075 |
| -0.1061006 | cg23636802 | TNXB        | 6  | 1.14E-05    |
| -0.1187108 | cg20152300 | TNXB;TNXB   | 6  | 0.001213301 |
| -0.1576917 | cg03376089 | TOM1L2;TOM  | 17 | 0.000375805 |
| -0.1051633 | cg24429974 | TOMM40L     | 1  | 0.000212784 |
| -0.1279368 | cg07238439 | TPCN1;TPCN  | 12 | 0.00423696  |
| -0.1176205 | cg20554822 | TPH1        | 11 | 0.000599488 |
| -0.1129009 | cg22270364 | TPM4;TPM4   | 19 | 0.000996286 |
| -0.1168775 | cg20168849 | TPRG1       | 3  | 0.030145876 |
| -0.1103    | cg16704530 | TRAF3IP2;TR | 6  | 0.00024126  |
| -0.1090396 | cg11756029 | TRAFD1;TRAI | 12 | 0.011194967 |
| -0.1160657 | cg19143211 | TRDN        | 6  | 0.001417305 |
| -0.1389567 | cg21328082 | TREM1       | 6  | 0.014338701 |
| -0.1192439 | cg10981439 | TREM1;TREM  | 6  | 0.029864486 |
| -0.1087048 | cg07507418 | TRERF1      | 6  | 0.000138821 |
| -0.1148893 | cg05264377 | TRERF1      | 6  | 0.000106049 |
| -0.1259017 | cg09103187 | TRERF1      | 6  | 1.40E-05    |

|            |            |             |    |             |
|------------|------------|-------------|----|-------------|
| -0.141758  | cg14905634 | TRHDE       | 12 | 0.000894923 |
| -0.1156191 | cg25746489 | TRIM26      | 6  | 0.001975155 |
| -0.1746767 | cg14606478 | TRIM26      | 6  | 0.000897454 |
| -0.1170781 | cg19365697 | TRIM26      | 6  | 0.000594187 |
| -0.1304413 | cg14741870 | TRIM26      | 6  | 0.000239079 |
| -0.129264  | cg01505556 | TRIM26      | 6  | 4.86E-05    |
| -0.1062468 | cg01591152 | TRIM29      | 11 | 2.96E-05    |
| -0.1278789 | cg22064048 | TRIM59      | 3  | 0.004901893 |
| -0.1051927 | cg22510509 | TRIM6       | 11 | 0.000378446 |
| -0.1024895 | cg21531038 | TRIO        | 5  | 0.01081316  |
| -0.165302  | cg05590156 | TRIO        | 5  | 0.01235598  |
| -0.1235389 | cg11421768 | TRIP13      | 5  | 0.000362857 |
| -0.1145467 | cg17510385 | TRIP13      | 5  | 0.000553047 |
| -0.1081324 | cg12705693 | TRIP13      | 5  | 0.000303973 |
| -0.1291704 | cg01154966 | TRPC4AP;TRF | 20 | 3.84E-05    |
| -0.1209307 | cg03388266 | TRPM8       | 2  | 2.66E-07    |
| -0.1133015 | cg26719625 | TRPV2       | 17 | 0.008196842 |
| -0.1519334 | cg09093656 | TRPV2       | 17 | 0.016779244 |
| -0.106384  | cg10122294 | TSNAX-DISC1 | 1  | 0.004931991 |
| -0.1015881 | cg05946353 | TSPAN10     | 17 | 0.002124755 |
| -0.1330352 | cg24328142 | TSPAN15     | 10 | 0.001089496 |
| -0.1278229 | cg18247223 | TSPAN18     | 11 | 9.75E-06    |
| -0.1180875 | cg12620005 | TTC39A;TTC3 | 1  | 0.004934317 |
| -0.1180178 | cg02048220 | TTC7B       | 14 | 6.85E-05    |
| -0.1135708 | cg08280368 | TTC9        | 14 | 0.000221885 |
| -0.1117124 | cg26282283 | TTYH3       | 7  | 0.048078672 |
| -0.1056702 | cg13756273 | TUBB1;TUBB  | 20 | 8.97E-05    |
| -0.1349488 | cg09057412 | TULP4;TULP4 | 6  | 8.08E-05    |
| -0.1318816 | cg16096836 | TXN2        | 22 | 4.71E-05    |
| -0.2426877 | cg15985533 | TYW3;TYW3;  | 1  | 0.019209645 |
| -0.1013583 | cg14557690 | UAP1L1      | 9  | 0.003248193 |
| -0.1210918 | cg25943661 | UBASH3B     | 11 | 7.14E-06    |
| -0.1155704 | cg05249460 | UBE2G1      | 17 | 0.000551256 |
| -0.1313964 | cg11554335 | UBE2L6      | 11 | 0.000155166 |
| -0.1032001 | cg06635797 | UHRF1;UHRF  | 19 | 0.01883993  |
| -0.1154772 | cg02527375 | ULK4        | 3  | 0.002385179 |
| -0.1366026 | cg25483907 | ULK4        | 3  | 0.000717526 |
| -0.1248389 | cg20724032 | ULK4        | 3  | 0.000532616 |
| -0.1204437 | cg20434422 | UOX         | 1  | 0.00677094  |
| -0.1767839 | cg15717250 | UPK1B       | 3  | 0.023410059 |
| -0.1413645 | cg01165661 | USP19       | 3  | 0.013311838 |
| -0.103004  | cg19024575 | USP36       | 17 | 0.000146694 |
| -0.1787344 | cg24759654 | USP36       | 17 | 0.000277886 |
| -0.1427357 | cg27049539 | USP40       | 2  | 3.75E-05    |
| -0.1016271 | cg20728419 | USP47       | 11 | 0.005545148 |
| -0.3066812 | cg23982392 | UST         | 6  | 0.003352016 |

|            |            |             |    |             |
|------------|------------|-------------|----|-------------|
| -0.105822  | cg17567602 | UXS1        | 2  | 0.037419034 |
| -0.1384722 | cg06710195 | VAV3        | 1  | 0.005703495 |
| -0.1201563 | cg17910564 | VDAC3;VDAC  | 8  | 0.005768312 |
| -0.1022945 | cg21617903 | VGLL4;VGLL4 | 3  | 0.000175305 |
| -0.1710183 | cg06878663 | VIPR2       | 7  | 0.001581645 |
| -0.1082654 | cg13860281 | VOPP1       | 7  | 0.012278882 |
| -0.1070528 | cg06889086 | VOPP1       | 7  | 0.000632074 |
| -0.1267586 | cg23654401 | VOPP1       | 7  | 0.01794335  |
| -0.1596309 | cg10039523 | VPS13D;VPS1 | 1  | 0.00162725  |
| -0.1391457 | cg26738024 | VPS52       | 6  | 0.047575531 |
| -0.1200171 | cg04689606 | VWA2        | 10 | 6.01E-06    |
| -0.1489014 | cg21689902 | VWA5A;VWA   | 11 | 0.015953762 |
| -0.1008964 | cg25884442 | VWF         | 12 | 0.003407064 |
| -0.1190057 | cg00187692 | WDFY2       | 13 | 0.003790072 |
| -0.1011248 | cg20576322 | WDFY3       | 4  | 0.006398099 |
| -0.1846256 | cg18009653 | WDR1;WDR1   | 4  | 0.000122798 |
| -0.1201959 | cg20469502 | WDR25;WDR   | 14 | 0.000301844 |
| -0.1073489 | cg19774788 | WDR51A;WC   | 3  | 0.000353189 |
| -0.1582548 | cg08103216 | WDR69       | 2  | 2.83E-05    |
| -0.1036338 | cg09775648 | WDR75       | 2  | 0.000285218 |
| -0.131897  | cg10080732 | WDR81;WDR   | 17 | 0.004753254 |
| -0.1056085 | cg09433910 | WDR81;WDR   | 17 | 0.000737452 |
| -0.1836909 | cg08007074 | WFDC1       | 16 | 0.000344398 |
| -0.1267842 | cg07982740 | WFDC3       | 20 | 0.006992475 |
| -0.1185539 | cg15558558 | WHAMM       | 15 | 0.017116775 |
| -0.1877097 | cg17165848 | WIPF1;WIPF  | 2  | 0.004219922 |
| -0.1797878 | cg03562120 | WISP2;WISP  | 20 | 0.001771663 |
| -0.1223377 | cg02179982 | WNT7B       | 22 | 0.005900176 |
| -0.1229804 | cg18377133 | WTIP        | 19 | 0.000414488 |
| -0.1007906 | cg24115019 | WWC1;WWC    | 5  | 0.007759534 |
| -0.106534  | cg07493562 | WWOX;WWC    | 16 | 0.029864768 |
| -0.1673388 | cg18484958 | WWTR1;WW    | 3  | 0.000105491 |
| -0.1392251 | cg10353683 | XCR1;XCR1   | 3  | 0.022917778 |
| -0.1405459 | cg07140459 | XRN1;XRN1   | 3  | 0.020672002 |
| -0.1199542 | cg14201946 | YDJC        | 22 | 2.39E-06    |
| -0.1148864 | cg04498511 | ZC3H11A     | 1  | 1.95E-05    |
| -0.1343035 | cg19872095 | ZC3H12A     | 1  | 0.000309345 |
| -0.1023181 | cg00859858 | ZC3H12A     | 1  | 0.008990691 |
| -0.1055863 | cg06762457 | ZC3H12D     | 6  | 0.023537895 |
| -0.1313444 | cg00073460 | ZC3H12D     | 6  | 0.002539921 |
| -0.134997  | cg09678939 | ZC3H12D;ZC  | 6  | 0.011834922 |
| -0.1723703 | cg09580859 | ZC3H3       | 8  | 0.000657944 |
| -0.1585824 | cg19598713 | ZC3H3       | 8  | 0.002707807 |
| -0.1583931 | cg02433509 | ZC3HAV1L    | 7  | 0.00464132  |
| -0.1327015 | cg08565003 | ZCCHC14     | 16 | 0.000210554 |
| -0.1203531 | cg00569808 | ZCCHC14     | 16 | 0.014136996 |

|            |            |              |    |             |
|------------|------------|--------------|----|-------------|
| -0.1018863 | cg09596336 | ZEB2;ZEB2;Zl | 2  | 6.59E-05    |
| -0.1250449 | cg00602811 | ZEB2;ZEB2;Zl | 2  | 0.002325654 |
| -0.1808141 | cg04640885 | ZEB2;ZEB2;Zl | 2  | 0.000926125 |
| -0.1699226 | cg17594003 | ZEB2;ZEB2;Zl | 2  | 0.005849417 |
| -0.138942  | cg10298741 | ZFHx3;ZFHx3  | 16 | 0.000238856 |
| -0.1271799 | cg01155325 | ZFP106       | 15 | 0.001252221 |
| -0.1249563 | cg23186952 | ZFP91;ZFP91  | 11 | 5.84E-06    |
| -0.1223888 | cg04884025 | ZFYVE9;ZFYV  | 1  | 5.07E-06    |
| -0.1196291 | cg19408207 | ZMAT3;ZMA    | 3  | 0.000784581 |
| -0.1240479 | cg16996242 | ZMYM4        | 1  | 0.000157049 |
| -0.1778599 | cg02872693 | ZNF133;ZNF1  | 20 | 0.001830253 |
| -0.1117403 | cg01855245 | ZNF19        | 16 | 0.007780725 |
| -0.1538957 | cg27474223 | ZNF19        | 16 | 0.005461498 |
| -0.1380504 | cg15176338 | ZNF212       | 7  | 2.69E-05    |
| -0.124691  | cg01105418 | ZNF238;ZNF2  | 1  | 3.24E-05    |
| -0.1510173 | cg27118035 | ZNF267       | 16 | 0.015192523 |
| -0.2296021 | cg14690467 | ZNF282       | 7  | 0.000796056 |
| -0.116066  | cg25224992 | ZNF354A      | 5  | 6.01E-06    |
| -0.1428159 | cg03861065 | ZNF365;ZNF3  | 10 | 0.004106978 |
| -0.1412978 | cg22961459 | ZNF385A;ZNI  | 12 | 3.99E-06    |
| -0.1034264 | cg06043820 | ZNF592       | 15 | 4.55E-06    |
| -0.1029489 | cg17501774 | ZNF697       | 1  | 3.82E-05    |
| -0.2202948 | cg26029292 | ZNF7         | 8  | 0.000371849 |
| -0.1305394 | cg15029037 | ZNF827       | 4  | 0.000104741 |
| -0.1610194 | cg26550214 |              | 5  | 0.026200765 |
| -0.1400673 | cg11404945 |              | 1  | 0.029166004 |
| -0.1089511 | cg16329658 |              | 7  | 0.000639913 |
| -0.1077525 | cg20123355 |              | 6  | 0.000102511 |
| -0.1076846 | cg15509286 |              | 3  | 0.041000269 |
| -0.103629  | cg05607079 |              | 3  | 0.001709369 |
| -0.1835688 | cg24837084 |              | 12 | 0.010733781 |
| -0.1773433 | cg25354587 |              | 12 | 0.016555883 |
| -0.1181435 | cg07480446 |              | 2  | 0.001606255 |
| -0.1678232 | cg03389046 |              | 1  | 0.000823477 |
| -0.1080786 | cg01471572 |              | 8  | 0.007057242 |
| -0.1240705 | cg06183244 |              | 6  | 0.007027195 |
| -0.1454832 | cg00760950 |              | 13 | 0.006727096 |
| -0.1207934 | cg08474164 |              | 2  | 0.00662313  |
| -0.3015312 | cg03024791 |              | 11 | 0.005578856 |
| -0.1894953 | cg19634252 |              | 4  | 0.014524491 |
| -0.1400777 | cg11691825 |              | 1  | 0.048229301 |
| -0.1305832 | cg19358608 |              | 20 | 0.00469715  |
| -0.1251917 | cg20813139 |              | 2  | 0.004857875 |
| -0.127423  | cg13426642 |              | 12 | 0.021196227 |
| -0.1176336 | cg04121938 |              | 1  | 0.000195694 |
| -0.118746  | cg20426881 |              | 1  | 0.000641141 |

|            |            |    |             |
|------------|------------|----|-------------|
| -0.1063209 | cg18360755 | 2  | 0.005996811 |
| -0.169698  | cg08913410 | 7  | 0.001905778 |
| -0.1456573 | cg05823812 | 13 | 0.019808242 |
| -0.1739014 | cg25019503 | 11 | 8.23E-05    |
| -0.1173056 | cg04895475 | 6  | 2.52E-05    |
| -0.1408229 | cg10215323 | 17 | 0.007245628 |
| -0.1019486 | cg09651708 | 5  | 0.000106049 |
| -0.1070068 | cg13854341 | 7  | 0.027423293 |
| -0.1211797 | cg20011940 | 11 | 0.002367048 |
| -0.1510638 | cg15984596 | 14 | 0.000678327 |
| -0.176718  | cg19565094 | 15 | 0.001260863 |
| -0.1207307 | cg25545598 | 8  | 0.019782976 |
| -0.1279122 | cg19695386 | 5  | 0.021128352 |
| -0.1238356 | cg22770916 | 13 | 0.019440293 |
| -0.1487985 | cg23195687 | 10 | 0.000180852 |
| -0.2253616 | cg14493181 | 6  | 0.001994151 |
| -0.1334813 | cg05792169 | 15 | 0.011953013 |
| -0.1982855 | cg25911123 | 17 | 0.000466602 |
| -0.1470797 | cg03834467 | 2  | 0.005324321 |
| -0.1970899 | cg19789047 | 5  | 0.000129107 |
| -0.1116234 | cg13879954 | 4  | 0.005804113 |
| -0.1313096 | cg12197573 | 18 | 0.005025696 |
| -0.1177794 | cg00742098 | 16 | 0.006901745 |
| -0.1305365 | cg24710503 | 11 | 0.014494509 |
| -0.1140984 | cg12253071 | 4  | 0.031637626 |
| -0.1536474 | cg09071280 | 1  | 0.00464132  |
| -0.1317483 | cg02093951 | 5  | 0.001686143 |
| -0.1158691 | cg19579005 | 6  | 0.01982028  |
| -0.1514826 | cg07143623 | 5  | 0.002013388 |
| -0.1036112 | cg05464291 | 6  | 0.010798048 |
| -0.12157   | cg01463644 | 16 | 1.45E-05    |
| -0.1260897 | cg07809831 | 16 | 0.000487403 |
| -0.1195011 | cg04822278 | 12 | 0.021068843 |
| -0.1051417 | cg03755872 | 11 | 0.009990054 |
| -0.1022595 | cg25476130 | 8  | 0.048159974 |
| -0.1035433 | cg22861317 | 19 | 0.016767118 |
| -0.1024795 | cg02520399 | 8  | 0.048082418 |
| -0.1481983 | cg12076915 | 19 | 9.82E-06    |
| -0.1575556 | cg15613991 | 7  | 0.033427874 |
| -0.1213136 | cg13788625 | 9  | 7.44E-06    |
| -0.1436443 | cg22228142 | 11 | 0.002709433 |
| -0.1191621 | cg06730183 | 5  | 0.047280367 |
| -0.1024559 | cg17126947 | 4  | 0.040927285 |
| -0.1311044 | cg09932730 | 7  | 0.044066296 |
| -0.1250105 | cg12453623 | 2  | 0.029913204 |
| -0.1391976 | cg25611057 | 3  | 1.31E-05    |



|            |            |    |             |
|------------|------------|----|-------------|
| -0.1463505 | cg02046247 | 12 | 0.005657979 |
| -0.1394628 | cg04234597 | 5  | 0.004133362 |
| -0.1384859 | cg21146170 | 8  | 0.010669019 |
| -0.1269897 | cg05731218 | 2  | 0.005289898 |
| -0.1031962 | cg07213771 | 6  | 0.000592412 |
| -0.1579155 | cg27110206 | 12 | 0.013443042 |
| -0.1063881 | cg04189320 | 15 | 0.00393463  |
| -0.1021134 | cg01942776 | 14 | 0.025988173 |
| -0.1640939 | cg10818657 | 2  | 0.005433865 |
| -0.1380747 | cg02219601 | 14 | 0.00882994  |
| -0.1376273 | cg20168495 | 4  | 0.014618761 |
| -0.1827175 | cg19235974 | 12 | 0.021449299 |
| -0.1139973 | cg18995788 | 8  | 0.011221829 |
| -0.1521715 | cg25401612 | 12 | 0.006777909 |
| -0.1224453 | cg05255994 | 3  | 0.004411437 |
| -0.138304  | cg15684661 | 5  | 0.003385632 |
| -0.1162516 | cg09911316 | 6  | 0.033158942 |
| -0.2036718 | cg14665062 | 5  | 0.031036513 |
| -0.1390145 | cg13559235 | 9  | 0.002031428 |
| -0.1240628 | cg07694621 | 2  | 0.00295633  |
| -0.2178821 | cg02192281 | 13 | 0.007245628 |
| -0.184934  | cg25750209 | 2  | 0.00216     |
| -0.1513573 | cg16072777 | 5  | 0.015169582 |
| -0.1512033 | cg24121967 | 11 | 0.00155429  |
| -0.1443161 | cg02713319 | 13 | 0.014268673 |
| -0.1436225 | cg08702879 | 10 | 0.003385632 |
| -0.1267143 | cg04011474 | 2  | 0.002230749 |
| -0.1160776 | cg02134839 | 17 | 0.043223379 |
| -0.1152858 | cg25764623 | 1  | 0.002057479 |
| -0.1616317 | cg04478698 | 4  | 0.014294088 |
| -0.1452626 | cg21141318 | 5  | 0.048623237 |
| -0.1369928 | cg14799457 | 18 | 0.036451209 |
| -0.1340692 | cg21306588 | 1  | 0.034281294 |
| -0.1755739 | cg17064870 | 14 | 0.021267599 |
| -0.1599962 | cg14507533 | 13 | 0.000121743 |
| -0.1565708 | cg22746333 | 5  | 0.000114303 |
| -0.1509856 | cg10281340 | 10 | 0.039652689 |
| -0.1468181 | cg19026817 | 20 | 0.001004472 |
| -0.1466777 | cg21658968 | 11 | 0.038898671 |
| -0.136739  | cg21101759 | 6  | 0.023650579 |
| -0.1260305 | cg04085896 | 1  | 0.0014137   |
| -0.105402  | cg17862146 | 5  | 0.006412751 |
| -0.1272138 | cg01502301 | 4  | 0.012158806 |
| -0.1092543 | cg19086570 | 3  | 0.009331388 |
| -0.1024168 | cg11111372 | 7  | 0.012466814 |
| -0.1885218 | cg24428389 | 1  | 0.005028521 |

|            |            |    |             |
|------------|------------|----|-------------|
| -0.1644031 | cg26473548 | 5  | 0.007067412 |
| -0.169626  | cg21805731 | 1  | 0.003039445 |
| -0.1668477 | cg25840608 | 15 | 0.003101712 |
| -0.1464855 | cg08854586 | 13 | 0.002557361 |
| -0.1012698 | cg24499677 | 17 | 0.003477073 |
| -0.1530266 | cg22172610 | 5  | 0.000183994 |
| -0.1274817 | cg03834116 | 2  | 0.029918335 |
| -0.1522632 | cg16781502 | 10 | 0.015084308 |
| -0.1409438 | cg04214938 | 2  | 0.010802054 |
| -0.1370083 | cg11834170 | 7  | 0.007036215 |
| -0.1256117 | cg18814699 | 7  | 0.014175583 |
| -0.115497  | cg10663897 | 2  | 0.027179809 |
| -0.1898066 | cg13753946 | 17 | 0.008648459 |
| -0.1253367 | cg10606620 | 4  | 0.003177515 |
| -0.1521825 | cg07145664 | 6  | 0.000284425 |
| -0.1197715 | cg16675485 | 2  | 0.001515598 |
| -0.1067231 | cg22006060 | 4  | 0.036327876 |
| -0.1616618 | cg08033998 | 14 | 0.000623721 |
| -0.1074709 | cg18019509 | 6  | 0.008195203 |
| -0.1009833 | cg03660096 | 8  | 0.034360278 |
| -0.1289555 | cg05850870 | 2  | 0.002092819 |
| -0.1059958 | cg08945340 | 16 | 0.042063015 |
| -0.1308159 | cg15744108 | 6  | 0.02173225  |
| -0.1853156 | cg03788952 | 18 | 0.000253928 |
| -0.1209768 | cg05134325 | 13 | 0.027888813 |
| -0.1045947 | cg03524147 | 10 | 0.011073927 |
| -0.1563052 | cg17126924 | 17 | 0.004502863 |
| -0.1379257 | cg17680211 | 10 | 0.007733218 |
| -0.1541352 | cg03720745 | 8  | 0.006162763 |
| -0.1314861 | cg20685713 | 1  | 0.0427136   |
| -0.1312345 | cg07502892 | 14 | 0.000164121 |
| -0.1456247 | cg06012748 | 11 | 0.002120577 |
| -0.1197823 | cg15602359 | 22 | 0.018861774 |
| -0.1337058 | cg14911766 | 6  | 0.014422833 |
| -0.141263  | cg23148948 | 11 | 0.00469489  |
| -0.1096688 | cg05331334 | 18 | 0.003794838 |
| -0.1008959 | cg24251218 | 11 | 0.001644971 |
| -0.1178166 | cg01765416 | 12 | 0.029401888 |
| -0.1162674 | cg08098420 | 16 | 0.018221957 |
| -0.1370054 | cg13942103 | 1  | 0.007501528 |
| -0.1035609 | cg25675673 | 6  | 0.001365539 |
| -0.1139958 | cg25631033 | 5  | 0.026194968 |
| -0.100174  | cg13401658 | 2  | 0.014061883 |
| -0.1086043 | cg09164426 | 2  | 0.017928343 |
| -0.1371762 | cg17933224 | 19 | 0.000607458 |
| -0.1165121 | cg22851694 | 1  | 0.002451815 |

|            |            |    |             |
|------------|------------|----|-------------|
| -0.1221234 | cg20708282 | 5  | 0.038421492 |
| -0.1210872 | cg25642955 | 5  | 1.82E-05    |
| -0.1750613 | cg13670898 | 14 | 0.042649731 |
| -0.1494412 | cg03719984 | 1  | 0.013280549 |
| -0.1052187 | cg20947259 | 1  | 0.000279227 |
| -0.1170934 | cg26119731 | 7  | 0.001201048 |
| -0.1622342 | cg25341313 | 1  | 0.025584255 |
| -0.1080403 | cg25215047 | 13 | 0.000607303 |
| -0.10194   | cg05144620 | 17 | 0.002635222 |
| -0.1135972 | cg27297558 | 14 | 0.002842356 |
| -0.1489929 | cg11797364 | 6  | 0.000727418 |
| -0.2208287 | cg26851984 | 5  | 0.001198472 |
| -0.1479525 | cg10549071 | 2  | 1.04E-05    |
| -0.1308388 | cg05786140 | 4  | 0.021222907 |
| -0.1221666 | cg19145082 | 3  | 0.002464643 |
| -0.1626554 | cg18244483 | 4  | 0.000632765 |
| -0.1526785 | cg01722566 | 16 | 0.029365498 |
| -0.1173439 | cg08023442 | 3  | 0.004387178 |
| -0.2337955 | cg01553231 | 5  | 0.000782226 |
| -0.1604811 | cg05191919 | 5  | 0.036219705 |
| -0.1514396 | cg09938273 | 7  | 0.001934365 |
| -0.1513335 | cg11895596 | 3  | 0.002278776 |
| -0.2509791 | cg04231042 | 4  | 0.001204437 |
| -0.2286996 | cg20431748 | 1  | 0.002711825 |
| -0.2275807 | cg08241401 | 20 | 0.008383082 |
| -0.2024471 | cg18067096 | 2  | 0.017631101 |
| -0.1895571 | cg09412707 | 4  | 0.001433798 |
| -0.1838942 | cg22399703 | 2  | 0.007740258 |
| -0.1762682 | cg17104766 | 2  | 0.000952637 |
| -0.1666344 | cg10253639 | 17 | 0.00144402  |
| -0.1607827 | cg01449756 | 4  | 0.045495251 |
| -0.1558313 | cg01063579 | 16 | 0.006129601 |
| -0.1545498 | cg24314564 | 3  | 0.007098415 |
| -0.1530965 | cg24522768 | 11 | 0.020041644 |
| -0.1479016 | cg19674722 | 2  | 0.021192738 |
| -0.1478585 | cg00248242 | 2  | 0.029565923 |
| -0.1468991 | cg19589396 | 8  | 0.008107837 |
| -0.1386687 | cg11791052 | 4  | 0.040136753 |
| -0.1368412 | cg08940378 | 2  | 0.001161101 |
| -0.1341944 | cg09944434 | 16 | 0.001173271 |
| -0.1333781 | cg26074025 | 14 | 0.001886903 |
| -0.1318262 | cg13725826 | 14 | 0.01408812  |
| -0.1312746 | cg02864638 | 17 | 0.003073337 |
| -0.1310869 | cg19765196 | 3  | 0.032875552 |
| -0.1308857 | cg23697406 | 7  | 0.007273009 |
| -0.1262387 | cg27228272 | 2  | 0.01282277  |

|            |                |    |             |
|------------|----------------|----|-------------|
| -0.1248064 | cg10579941     | 1  | 0.027107225 |
| -0.1211083 | cg06255006     | 16 | 0.000455066 |
| -0.1178645 | cg25877512     | 11 | 0.010937186 |
| -0.1094073 | cg04719721     | 11 | 0.001958021 |
| -0.1092018 | cg07969668     | 8  | 0.036842527 |
| -0.1041608 | cg22036894     | 1  | 0.027084146 |
| -0.1013135 | cg07696354     | 4  | 0.001394535 |
| -0.10901   | cg22672060     | 4  | 0.009031022 |
| -0.1156143 | cg18291422     | 6  | 0.00049738  |
| -0.1079505 | cg10441909     | 12 | 0.029918335 |
| -0.1494866 | cg08837481     | 8  | 0.002318658 |
| -0.1333258 | cg04228742     | 16 | 0.038262081 |
| -0.1324818 | cg23095243     | 14 | 0.000427251 |
| -0.1059333 | cg08866665     | 6  | 0.030012836 |
| -0.1560021 | cg13423054     | 3  | 0.003029838 |
| -0.1084496 | cg18234224     | 1  | 0.01003364  |
| -0.1077356 | cg13797468     | 3  | 0.009030275 |
| -0.1052265 | cg17472800     | 5  | 0.001821398 |
| -0.1325265 | cg25002152     | 10 | 0.016049864 |
| -0.1176904 | cg23521140     | 2  | 0.012826226 |
| -0.1039513 | ch.2.71774667F | 2  | 0.006336467 |
| -0.1459465 | cg02598430     | 6  | 2.09E-05    |
| -0.1386617 | cg01473038     | 2  | 0.001644819 |
| -0.1001002 | cg22876901     | 2  | 0.021717342 |
| -0.1085304 | cg09514588     | 10 | 0.001345638 |
| -0.1066169 | cg21981144     | 19 | 0.000226704 |
| -0.1251297 | cg18914751     | 5  | 0.003606401 |
| -0.125524  | cg08595592     | 7  | 0.000440599 |
| -0.1080687 | cg26404226     | 10 | 0.011350088 |
| -0.1598171 | cg00622516     | 13 | 0.023601029 |
| -0.1233995 | cg12071775     | 14 | 0.007995799 |
| -0.1022239 | cg08814536     | 13 | 0.016988039 |
| -0.1025357 | cg14790115     | 13 | 0.005831888 |
| -0.1516359 | cg10650729     | 22 | 5.17E-05    |
| -0.1460552 | cg26429381     | 2  | 0.000234011 |
| -0.101083  | cg22044408     | 17 | 0.00041922  |
| -0.1452962 | cg03078141     | 4  | 0.001284277 |
| -0.1121346 | cg00023750     | 16 | 0.003608081 |
| -0.1232968 | cg00347746     | 19 | 6.01E-06    |
| -0.2273177 | cg14895540     | 2  | 0.001458273 |
| -0.2161587 | cg24848452     | 8  | 0.004055374 |
| -0.214406  | cg07701307     | 5  | 0.000260163 |
| -0.1808552 | cg06528645     | 1  | 0.03373196  |
| -0.1717797 | cg00583068     | 1  | 0.047054719 |
| -0.138013  | cg15688980     | 3  | 0.001177156 |
| -0.1244647 | cg07786355     | 10 | 0.005237641 |

|            |            |    |             |
|------------|------------|----|-------------|
| -0.1637198 | cg15323253 | 6  | 0.00116793  |
| -0.1059278 | cg14334258 | 9  | 0.002317975 |
| -0.1027241 | cg10817669 | 6  | 0.001956924 |
| -0.1035457 | cg23104436 | 11 | 0.003414465 |
| -0.1091236 | cg07537152 | 12 | 0.011214466 |
| -0.1333772 | cg08529744 | 1  | 0.003462783 |
| -0.1165782 | cg25486618 | 11 | 0.000233842 |
| -0.1187638 | cg15765546 | 3  | 0.000765209 |
| -0.1357725 | cg12703333 | 10 | 0.0122688   |
| -0.1155235 | cg14221851 | 12 | 0.036346442 |
| -0.1188296 | cg16721489 | 2  | 0.012203805 |
| -0.1367946 | cg20641675 | 7  | 0.000574146 |
| -0.1444875 | cg26962618 | 15 | 0.042795948 |
| -0.1408499 | cg04329088 | 2  | 0.0381592   |
| -0.1390512 | cg09626054 | 7  | 0.020200468 |
| -0.1929087 | cg25546651 | 4  | 0.001885138 |
| -0.1000598 | cg09764611 | 12 | 0.028312937 |
| -0.1007368 | cg24753988 | 14 | 0.005930412 |
| -0.1199717 | cg06570967 | 10 | 0.00755339  |
| -0.1199636 | cg22427208 | 12 | 0.001940182 |
| -0.1081109 | cg26123532 | 2  | 0.001230241 |
| -0.1735989 | cg26109093 | 4  | 0.001384411 |
| -0.1089768 | cg07505018 | 16 | 0.049187754 |
| -0.1736017 | cg20367258 | 8  | 0.000649711 |
| -0.108202  | cg03906681 | 15 | 0.0479834   |
| -0.1241265 | cg26028440 | 1  | 7.97E-06    |
| -0.172101  | cg01826025 | 1  | 0.000197047 |
| -0.1593257 | cg08198071 | 2  | 0.036389046 |
| -0.1052664 | cg03879160 | 2  | 0.000306963 |
| -0.157227  | cg06798115 | 3  | 0.017443274 |
| -0.175492  | cg11819702 | 5  | 0.003360586 |
| -0.1005891 | cg17046141 | 5  | 0.007825738 |
| -0.1553625 | cg07339138 | 3  | 0.005023861 |
| -0.1247811 | cg20142213 | 8  | 0.021678172 |
| -0.1105105 | cg01430103 | 13 | 0.03527929  |
| -0.1967228 | cg14456490 | 3  | 9.91E-06    |
| -0.1575261 | cg09373102 | 16 | 0.00044896  |
| -0.1344647 | cg24757778 | 10 | 0.000839298 |
| -0.1331645 | cg01364674 | 1  | 0.000790082 |
| -0.1260122 | cg05146536 | 4  | 7.85E-05    |
| -0.117974  | cg00962707 | 16 | 0.000261418 |
| -0.1250536 | cg01556275 | 1  | 0.001391348 |
| -0.1199787 | cg12121166 | 11 | 0.006532443 |
| -0.1128002 | cg18837542 | 4  | 0.004823764 |
| -0.1569421 | cg11964099 | 17 | 0.041685146 |
| -0.1346289 | cg07191524 | 16 | 0.024002302 |

|            |            |    |             |
|------------|------------|----|-------------|
| -0.1021999 | cg24882709 | 10 | 0.002711825 |
| -0.1013268 | cg08655662 | 6  | 0.003144743 |
| -0.1296056 | cg23540272 | 14 | 0.031938491 |
| -0.1689656 | cg06755427 | 2  | 0.010417465 |
| -0.1677365 | cg06936290 | 7  | 0.000100924 |
| -0.1092562 | cg16865953 | 2  | 0.010497348 |
| -0.1380946 | cg17159058 | 8  | 0.019558528 |
| -0.1596328 | cg04094838 | 2  | 2.68E-06    |
| -0.1166044 | cg15321306 | 12 | 0.016513977 |
| -0.1087598 | cg20068510 | 15 | 0.000769191 |
| -0.1186717 | cg18391127 | 15 | 0.024849151 |
| -0.1312002 | cg02953529 | 16 | 0.001105594 |
| -0.1907088 | cg13017983 | 8  | 0.00725475  |
| -0.1219488 | cg26118643 | 1  | 0.002431222 |
| -0.122319  | cg09718071 | 3  | 0.000194243 |
| -0.143563  | cg13432945 | 1  | 0.008521354 |
| -0.1416239 | cg12025181 | 14 | 0.001960632 |
| -0.1044815 | cg26539455 | 6  | 0.007570412 |
| -0.116378  | cg08800670 | 6  | 0.007105958 |
| -0.1368392 | cg23899057 | 12 | 0.000111082 |
| -0.1317849 | cg23512231 | 17 | 0.028801392 |
| -0.1003035 | cg07316846 | 2  | 0.022200414 |
| -0.1572415 | cg11481582 | 10 | 0.000627016 |
| -0.1357726 | cg26763394 | 3  | 0.00069418  |
| -0.1320899 | cg25996077 | 2  | 0.001428812 |
| -0.128671  | cg11554566 | 21 | 0.000481276 |
| -0.1149509 | cg20309975 | 8  | 0.004934317 |
| -0.1138181 | cg19266329 | 1  | 0.016838186 |
| -0.1079129 | cg16295461 | 4  | 0.014922992 |
| -0.1040467 | cg08494738 | 16 | 4.89E-05    |
| -0.1032229 | cg24881334 | 17 | 0.001964107 |
| -0.1174692 | cg06829584 | 10 | 0.033785609 |
| -0.1077617 | cg19670610 | 4  | 0.000260163 |
| -0.1071296 | cg23552820 | 17 | 0.003306987 |
| -0.1080218 | cg10234693 | 12 | 0.000893003 |
| -0.1072465 | cg02563916 | 12 | 0.000840454 |
| -0.1426768 | cg09763439 | 6  | 0.000151925 |
| -0.1897629 | cg02104392 | 2  | 0.001040384 |
| -0.1328445 | cg16058274 | 14 | 0.012118611 |
| -0.1274242 | cg18061711 | 5  | 0.013518536 |
| -0.1112333 | cg09476092 | 21 | 7.99E-05    |
| -0.1269742 | cg06034336 | 4  | 2.10E-05    |
| -0.1139785 | cg01005425 | 13 | 0.030724206 |
| -0.1043077 | cg21694161 | 17 | 0.012004412 |
| -0.1695869 | cg10466548 | 16 | 0.041180278 |
| -0.139241  | cg02670637 | 1  | 0.024744186 |

|            |            |    |             |
|------------|------------|----|-------------|
| -0.1186404 | cg08429815 | 2  | 0.000281415 |
| -0.141166  | cg11906021 | 17 | 1.20E-05    |
| -0.1739295 | cg07638009 | 12 | 0.031464852 |
| -0.1465209 | cg08615354 | 5  | 0.001509746 |
| -0.1233545 | cg18564881 | 11 | 0.001018302 |
| -0.11703   | cg06484123 | 19 | 5.11E-05    |
| -0.1032269 | cg26232359 | 14 | 0.002370304 |
| -0.2908235 | cg02803141 | 16 | 0.002122283 |
| -0.2466769 | cg13316054 | 10 | 0.024041377 |
| -0.2387083 | cg23583501 | 14 | 0.002368923 |
| -0.2358188 | cg19683417 | 5  | 0.000388814 |
| -0.2219879 | cg20263901 | 6  | 0.001691719 |
| -0.2211579 | cg26295786 | 14 | 0.008221405 |
| -0.2201806 | cg16125725 | 15 | 0.008804594 |
| -0.2164072 | cg20587808 | 3  | 0.012370893 |
| -0.2151259 | cg26109393 | 14 | 0.000627016 |
| -0.205873  | cg02922879 | 1  | 0.010824512 |
| -0.2047262 | cg22013019 | 6  | 0.010083842 |
| -0.2027412 | cg10500084 | 5  | 7.35E-05    |
| -0.2026609 | cg11419575 | 2  | 7.72E-05    |
| -0.201086  | cg03570577 | 6  | 0.017451527 |
| -0.2007529 | cg16625119 | 16 | 9.65E-05    |
| -0.1984983 | cg02389180 | 7  | 0.000211243 |
| -0.196066  | cg00232535 | 7  | 0.000585421 |
| -0.1959488 | cg25568241 | 3  | 0.009296992 |
| -0.1957276 | cg21238234 | 15 | 0.007644645 |
| -0.1957261 | cg12246922 | 7  | 0.020873108 |
| -0.1930787 | cg03762802 | 8  | 0.002687536 |
| -0.1928079 | cg16393905 | 1  | 0.002100554 |
| -0.1922647 | cg14449958 | 14 | 0.032236169 |
| -0.1922047 | cg19354017 | 2  | 0.02207648  |
| -0.1890759 | cg23091549 | 1  | 0.003655203 |
| -0.1887057 | cg23662331 | 1  | 0.000544135 |
| -0.1882006 | cg13808936 | 9  | 0.000175375 |
| -0.1866164 | cg13332142 | 3  | 0.004652268 |
| -0.1854319 | cg10902850 | 3  | 0.000212407 |
| -0.1850871 | cg03879971 | 11 | 0.000215349 |
| -0.1848713 | cg13714378 | 11 | 0.000904598 |
| -0.1842981 | cg24002653 | 1  | 0.022610561 |
| -0.1839015 | cg02974204 | 16 | 0.001289184 |
| -0.1835542 | cg01577029 | 12 | 0.002395098 |
| -0.1831198 | cg21707089 | 8  | 0.002388453 |
| -0.1825859 | cg02655361 | 3  | 0.008196481 |
| -0.1816464 | cg13996610 | 4  | 0.011103946 |
| -0.1802351 | cg18007641 | 4  | 0.01736055  |
| -0.180186  | cg06388350 | 4  | 0.029880441 |

|            |            |    |             |
|------------|------------|----|-------------|
| -0.1795463 | cg17715141 | 4  | 0.008069014 |
| -0.1794677 | cg15999887 | 6  | 1.14E-05    |
| -0.1781249 | cg26300517 | 4  | 0.000321856 |
| -0.1766414 | cg11304968 | 21 | 0.00409258  |
| -0.1764865 | cg07972716 | 20 | 0.002045394 |
| -0.1764531 | cg15808795 | 2  | 0.002564482 |
| -0.1764299 | cg24993140 | 2  | 0.000191767 |
| -0.1761513 | cg21221767 | 14 | 0.027039056 |
| -0.1761125 | cg18226915 | 11 | 0.001761938 |
| -0.175597  | cg21131711 | 3  | 0.002948037 |
| -0.1754161 | cg15136913 | 10 | 0.011383397 |
| -0.175302  | cg13923696 | 1  | 0.007756493 |
| -0.1751477 | cg04526480 | 1  | 0.005375931 |
| -0.1746824 | cg17343184 | 2  | 0.000684762 |
| -0.1746302 | cg00176043 | 1  | 0.012655007 |
| -0.1745474 | cg19269093 | 2  | 0.015703165 |
| -0.1733334 | cg20644554 | 13 | 7.72E-05    |
| -0.1728396 | cg05389236 | 6  | 0.019001105 |
| -0.1721055 | cg10416784 | 2  | 0.002634754 |
| -0.1716217 | cg21369890 | 6  | 0.003067983 |
| -0.171438  | cg15921887 | 10 | 0.000921638 |
| -0.1713983 | cg04757350 | 10 | 5.20E-05    |
| -0.1697343 | cg01413671 | 16 | 0.001222635 |
| -0.1697196 | cg03316934 | 2  | 0.000248085 |
| -0.1693965 | cg14360405 | 11 | 0.001054912 |
| -0.1689067 | cg19382019 | 19 | 0.00223404  |
| -0.1687127 | cg01854676 | 14 | 0.00043262  |
| -0.1686438 | cg07712710 | 11 | 0.000181789 |
| -0.1685875 | cg10060191 | 16 | 0.000330298 |
| -0.1684964 | cg13860928 | 1  | 0.000922364 |
| -0.1678012 | cg17253981 | 4  | 0.029240392 |
| -0.1677512 | cg26025505 | 11 | 0.000156495 |
| -0.1675738 | cg14234912 | 11 | 0.020433744 |
| -0.1663258 | cg03913859 | 2  | 0.00085855  |
| -0.165686  | cg23695131 | 11 | 5.50E-05    |
| -0.1656779 | cg10240139 | 6  | 0.000487514 |
| -0.1656638 | cg23640925 | 1  | 0.003563313 |
| -0.1651721 | cg11905324 | 8  | 0.001602175 |
| -0.164817  | cg00418071 | 1  | 2.27E-06    |
| -0.1647637 | cg16933229 | 4  | 0.037691935 |
| -0.1646094 | cg23349326 | 7  | 0.020267757 |
| -0.1645773 | cg05363382 | 17 | 0.000123211 |
| -0.16417   | cg25617028 | 22 | 3.23E-05    |
| -0.1639758 | cg25483123 | 12 | 0.014226522 |
| -0.1635145 | cg05091585 | 13 | 0.001365582 |
| -0.1625789 | cg18334977 | 3  | 0.010311471 |



|            |            |    |             |
|------------|------------|----|-------------|
| -0.162264  | cg22086536 | 11 | 3.82E-05    |
| -0.1621767 | cg26325867 | 6  | 0.02677954  |
| -0.1619368 | cg07780762 | 1  | 0.001002736 |
| -0.1616488 | cg02897366 | 1  | 0.001069347 |
| -0.1615143 | cg11310639 | 10 | 0.003576484 |
| -0.1611741 | cg21106719 | 3  | 0.014680447 |
| -0.1609713 | cg13498757 | 1  | 0.002530728 |
| -0.160537  | cg04758329 | 16 | 0.000336124 |
| -0.1604017 | cg00283986 | 2  | 0.000360517 |
| -0.1601287 | cg16523850 | 6  | 0.029238774 |
| -0.1599066 | cg02700194 | 10 | 0.012607794 |
| -0.1598821 | cg22779896 | 4  | 0.002265209 |
| -0.1597076 | cg20300541 | 17 | 0.000225282 |
| -0.1596934 | cg24778004 | 2  | 0.004272583 |
| -0.1596263 | cg12658387 | 17 | 1.11E-05    |
| -0.1594913 | cg21451309 | 20 | 0.000116193 |
| -0.159222  | cg13167862 | 2  | 4.58E-05    |
| -0.1588313 | cg06452558 | 8  | 0.004431192 |
| -0.1587435 | cg16797473 | 6  | 5.91E-07    |
| -0.1584724 | cg09435170 | 4  | 0.003615508 |
| -0.1582646 | cg20790798 | 5  | 0.019139811 |
| -0.1580572 | cg08375396 | 11 | 0.00076673  |
| -0.1579563 | cg01998856 | 11 | 0.00653379  |
| -0.1577326 | cg22780193 | 13 | 0.028017116 |
| -0.1575621 | cg25961952 | 5  | 0.020137824 |
| -0.1572032 | cg00556100 | 1  | 0.021311242 |
| -0.1569023 | cg04035553 | 8  | 0.019209382 |
| -0.1564095 | cg17785202 | 1  | 0.036144525 |
| -0.1560113 | cg16039142 | 7  | 0.014919317 |
| -0.1559569 | cg17328839 | 1  | 0.004774667 |
| -0.1556955 | cg01432692 | 1  | 0.005212866 |
| -0.1556547 | cg04398893 | 6  | 0.000353262 |
| -0.1556286 | cg05467828 | 10 | 0.000390888 |
| -0.1547842 | cg13457741 | 10 | 0.003718366 |
| -0.1547569 | cg23201812 | 11 | 0.028312937 |
| -0.1542534 | cg04510459 | 1  | 0.031264663 |
| -0.1539925 | cg02588283 | 7  | 0.000397505 |
| -0.1539197 | cg00071012 | 15 | 0.001438544 |
| -0.1538514 | cg03002735 | 8  | 3.26E-05    |
| -0.1531559 | cg17745339 | 5  | 0.007427243 |
| -0.1528904 | cg13359161 | 4  | 0.003233882 |
| -0.1526352 | cg08312765 | 12 | 0.005815911 |
| -0.1523015 | cg01119374 | 2  | 3.88E-05    |
| -0.1519709 | cg21049397 | 12 | 0.002189566 |
| -0.1516807 | cg24140528 | 17 | 0.000632074 |
| -0.1512096 | cg12790424 | 14 | 0.016642997 |

|            |            |    |             |
|------------|------------|----|-------------|
| -0.1508195 | cg02896757 | 8  | 0.00911261  |
| -0.1504957 | cg20415947 | 1  | 5.90E-05    |
| -0.1504192 | cg15457718 | 14 | 0.003449434 |
| -0.1503374 | cg21393124 | 17 | 0.002242871 |
| -0.1501514 | cg10431802 | 6  | 0.003758807 |
| -0.1498393 | cg18403852 | 21 | 0.001868252 |
| -0.149815  | cg05464506 | 2  | 0.047936977 |
| -0.1497436 | cg12569835 | 2  | 0.008375787 |
| -0.1493798 | cg20559385 | 6  | 0.00210651  |
| -0.1492721 | cg22626675 | 11 | 0.000285404 |
| -0.1492216 | cg08468401 | 3  | 0.022012789 |
| -0.148856  | cg26037936 | 11 | 2.17E-05    |
| -0.148702  | cg08257009 | 14 | 0.01942293  |
| -0.1486259 | cg14016418 | 2  | 0.006260743 |
| -0.1483055 | cg25286679 | 1  | 0.002855633 |
| -0.1480513 | cg21697667 | 2  | 1.84E-05    |
| -0.1478688 | cg05317600 | 13 | 0.009538221 |
| -0.1474627 | cg01282174 | 11 | 0.000586806 |
| -0.1474121 | cg10828561 | 8  | 0.001009975 |
| -0.147163  | cg15831285 | 5  | 0.000634863 |
| -0.1469705 | cg16882472 | 2  | 0.003474669 |
| -0.1467268 | cg14272084 | 14 | 0.016757564 |
| -0.1466153 | cg11324467 | 8  | 0.024860997 |
| -0.1465854 | cg25673591 | 17 | 0.007249029 |
| -0.1465406 | cg14830371 | 8  | 0.001606255 |
| -0.1462774 | cg08388802 | 2  | 0.000201538 |
| -0.1461898 | cg10420150 | 10 | 0.000149663 |
| -0.1458575 | cg24298578 | 6  | 0.012007457 |
| -0.1457608 | cg01812571 | 12 | 0.000285417 |
| -0.1456934 | cg13393678 | 2  | 0.018505186 |
| -0.1452387 | cg13322037 | 7  | 0.010473586 |
| -0.1450195 | cg15581944 | 11 | 0.001300548 |
| -0.1447086 | cg05421464 | 15 | 0.000532616 |
| -0.1446824 | cg06177459 | 8  | 0.016560059 |
| -0.1442455 | cg26994377 | 4  | 0.004119243 |
| -0.1439224 | cg24098131 | 10 | 4.96E-05    |
| -0.1437979 | cg17375248 | 2  | 0.027902633 |
| -0.1437814 | cg14210790 | 15 | 0.001596501 |
| -0.1436398 | cg10233830 | 12 | 0.037129861 |
| -0.143606  | cg04057599 | 11 | 0.001411403 |
| -0.1434933 | cg04528720 | 16 | 0.00052227  |
| -0.1434878 | cg03143046 | 6  | 0.018002812 |
| -0.1432048 | cg01213342 | 7  | 0.00031754  |
| -0.142805  | cg12444298 | 1  | 0.002847458 |
| -0.1425498 | cg01830154 | 17 | 0.007344938 |
| -0.1424887 | cg18729133 | 13 | 0.028974986 |

|            |            |    |             |
|------------|------------|----|-------------|
| -0.1422646 | cg03455284 | 5  | 0.011506243 |
| -0.1422253 | cg11958234 | 1  | 0.000355121 |
| -0.141972  | cg14420953 | 6  | 0.001227051 |
| -0.1413237 | cg25954269 | 15 | 0.016700792 |
| -0.1412626 | cg07993363 | 13 | 0.000643748 |
| -0.1410242 | cg03384920 | 2  | 0.016401383 |
| -0.1409868 | cg09726198 | 3  | 0.008333666 |
| -0.1409363 | cg12431891 | 3  | 0.001002758 |
| -0.1409149 | cg17654419 | 2  | 0.005061071 |
| -0.140913  | cg01164574 | 21 | 0.010112766 |
| -0.1406909 | cg01882113 | 2  | 0.000272392 |
| -0.1403511 | cg21202276 | 1  | 0.003190184 |
| -0.1403213 | cg16592101 | 2  | 0.020383101 |
| -0.1402283 | cg22122321 | 4  | 0.039635985 |
| -0.1401595 | cg23138250 | 5  | 0.000931875 |
| -0.1400543 | cg27306680 | 2  | 0.00078909  |
| -0.1398244 | cg00619263 | 5  | 0.000153611 |
| -0.1393865 | cg21557087 | 2  | 0.000907611 |
| -0.1392747 | cg01542423 | 8  | 0.000157749 |
| -0.1390889 | cg12165219 | 8  | 0.01592013  |
| -0.1390047 | cg00120332 | 6  | 0.000239757 |
| -0.1388799 | cg08367573 | 3  | 0.001303222 |
| -0.1387933 | cg23391288 | 13 | 0.005546895 |
| -0.1385005 | cg19106326 | 8  | 0.003545468 |
| -0.1384773 | cg13758186 | 2  | 0.001243767 |
| -0.138294  | cg03850811 | 2  | 3.88E-05    |
| -0.1381495 | cg13441524 | 1  | 0.030000387 |
| -0.1381111 | cg22378095 | 6  | 0.001391128 |
| -0.1381108 | cg04500909 | 5  | 0.000953716 |
| -0.1379445 | cg05033952 | 16 | 0.015393842 |
| -0.1376652 | cg01811583 | 14 | 0.000223459 |
| -0.1375545 | cg16408820 | 8  | 0.00045719  |
| -0.1375439 | cg19247654 | 18 | 0.021068843 |
| -0.1375288 | cg18650237 | 4  | 0.00061268  |
| -0.1374907 | cg11225089 | 5  | 0.010028367 |
| -0.1374734 | cg13632630 | 15 | 0.000662664 |
| -0.137435  | cg02932364 | 1  | 0.002446241 |
| -0.1373022 | cg09216236 | 1  | 0.005935737 |
| -0.1370921 | cg09870385 | 17 | 0.001840124 |
| -0.1370164 | cg04461678 | 12 | 7.67E-07    |
| -0.1370129 | cg06587435 | 16 | 4.99E-05    |
| -0.1369496 | cg25705266 | 17 | 4.48E-05    |
| -0.1367725 | cg26648024 | 3  | 0.014442809 |
| -0.1367051 | cg21552063 | 6  | 0.001608251 |
| -0.1362802 | cg12785993 | 2  | 3.86E-05    |
| -0.1361394 | cg19258177 | 1  | 0.01079527  |

|            |                 |    |             |
|------------|-----------------|----|-------------|
| -0.1358929 | cg09501717      | 2  | 0.000319007 |
| -0.1354012 | cg13945880      | 5  | 0.000712187 |
| -0.1352982 | cg14918300      | 14 | 0.002236397 |
| -0.135278  | cg16703420      | 14 | 0.01402418  |
| -0.1352403 | cg15149205      | 8  | 0.008288855 |
| -0.1351459 | cg21286117      | 17 | 4.13E-05    |
| -0.1349629 | cg21498326      | 21 | 0.002329573 |
| -0.1348959 | cg08939394      | 1  | 0.041430388 |
| -0.1344263 | cg10108710      | 14 | 0.000420019 |
| -0.1343471 | cg06853836      | 6  | 0.000720165 |
| -0.134114  | cg20427318      | 6  | 0.00010815  |
| -0.1340215 | cg26727231      | 8  | 0.00024564  |
| -0.1338658 | cg06639053      | 12 | 0.002747045 |
| -0.1337017 | cg22775600      | 20 | 0.000195317 |
| -0.1335573 | cg24549912      | 5  | 0.030337974 |
| -0.1334442 | cg04134096      | 3  | 7.42E-05    |
| -0.1332875 | cg11013714      | 3  | 0.000145092 |
| -0.1332651 | cg10979364      | 5  | 2.50E-05    |
| -0.1332218 | cg14241836      | 7  | 0.015111672 |
| -0.1331807 | cg21807262      | 14 | 6.71E-05    |
| -0.1331    | cg08474859      | 4  | 0.036592483 |
| -0.1330994 | cg15476396      | 15 | 0.002422292 |
| -0.1330437 | cg04239548      | 1  | 0.000347361 |
| -0.1328369 | cg02184226      | 17 | 0.003831073 |
| -0.1327976 | cg03183618      | 2  | 0.001634255 |
| -0.1326753 | cg07958689      | 17 | 0.001190573 |
| -0.1326181 | ch.3.82259654F  | 3  | 0.001463761 |
| -0.1325461 | cg18211761      | 8  | 0.037828772 |
| -0.1325202 | cg08365609      | 19 | 0.024583702 |
| -0.1325166 | cg14671011      | 5  | 0.016154162 |
| -0.1323863 | cg04137004      | 11 | 0.0020448   |
| -0.1319756 | cg02049833      | 2  | 0.007164961 |
| -0.1319603 | cg25898192      | 15 | 0.012083071 |
| -0.131753  | cg22588983      | 5  | 0.000833457 |
| -0.1313998 | cg15559833      | 2  | 0.031711256 |
| -0.1312128 | cg07243762      | 12 | 0.00135578  |
| -0.1311162 | cg04244152      | 10 | 0.000435045 |
| -0.1311033 | cg09030187      | 1  | 0.002438391 |
| -0.1310849 | cg03262802      | 2  | 0.000802595 |
| -0.1309995 | cg10601624      | 12 | 0.003477073 |
| -0.1309587 | ch.2.105901354F | 2  | 0.002003235 |
| -0.1304146 | cg09528494      | 8  | 0.012329326 |
| -0.1303821 | cg10660848      | 8  | 0.000749019 |
| -0.1303782 | cg02495743      | 11 | 0.005030378 |
| -0.1303154 | cg02322889      | 4  | 0.000249732 |
| -0.1303097 | cg00566961      | 5  | 0.001182611 |

|            |            |    |             |
|------------|------------|----|-------------|
| -0.1301907 | cg23184653 | 3  | 0.013463389 |
| -0.1299994 | cg09410512 | 2  | 0.01666243  |
| -0.1299653 | cg23920246 | 2  | 0.005664349 |
| -0.1298481 | cg03663556 | 7  | 0.049572713 |
| -0.1297249 | cg24392939 | 3  | 1.48E-05    |
| -0.1295344 | cg16251016 | 19 | 0.000558651 |
| -0.1291743 | cg05605980 | 7  | 0.007964429 |
| -0.1291079 | cg27325820 | 5  | 0.033531164 |
| -0.1290489 | cg04718050 | 14 | 0.018417111 |
| -0.1290193 | cg17947364 | 6  | 0.000458663 |
| -0.1289521 | cg23280506 | 17 | 0.001042432 |
| -0.1286573 | cg09729012 | 3  | 0.01491347  |
| -0.1286254 | cg16243532 | 3  | 0.008286462 |
| -0.1284879 | cg12048965 | 10 | 0.034325962 |
| -0.1284608 | cg03252770 | 4  | 0.022105002 |
| -0.1282645 | cg21544415 | 12 | 0.00903254  |
| -0.1279406 | cg13993197 | 1  | 0.000599864 |
| -0.1277862 | cg21199629 | 14 | 0.032318829 |
| -0.1277573 | cg00602295 | 16 | 0.025217828 |
| -0.1276151 | cg19616339 | 2  | 0.007607727 |
| -0.1276148 | cg26607258 | 1  | 3.88E-05    |
| -0.1274651 | cg11464297 | 10 | 0.000246448 |
| -0.1274531 | cg19726711 | 10 | 0.000524026 |
| -0.1270177 | cg06465851 | 2  | 0.006251956 |
| -0.1269629 | cg07216436 | 3  | 0.006841286 |
| -0.1267898 | cg24339574 | 1  | 3.75E-06    |
| -0.1267106 | cg01736164 | 14 | 0.000202684 |
| -0.1265032 | cg14487111 | 9  | 0.000163344 |
| -0.1264202 | cg09338148 | 16 | 0.005335686 |
| -0.1261881 | cg00172872 | 12 | 0.007179232 |
| -0.1261167 | cg22304705 | 2  | 0.000233546 |
| -0.1261093 | cg20706315 | 17 | 0.006251612 |
| -0.1259807 | cg23051091 | 8  | 0.014211334 |
| -0.1258726 | cg09227277 | 6  | 0.001561183 |
| -0.1258398 | cg01905967 | 5  | 0.005251844 |
| -0.1257578 | cg05871756 | 5  | 0.014367327 |
| -0.1256788 | cg25343618 | 1  | 0.004175084 |
| -0.1255782 | cg09558425 | 10 | 0.000394416 |
| -0.1253913 | cg01941278 | 5  | 0.00023862  |
| -0.125389  | cg25778661 | 19 | 1.95E-05    |
| -0.1252629 | cg20216309 | 3  | 0.001373359 |
| -0.1250836 | cg13536080 | 11 | 0.024025326 |
| -0.1250355 | cg13468767 | 17 | 0.017685131 |
| -0.1250139 | cg18765405 | 5  | 0.001265336 |
| -0.1249134 | cg05468458 | 5  | 0.000302552 |
| -0.124883  | cg00038020 | 1  | 0.003129544 |

|            |            |    |             |
|------------|------------|----|-------------|
| -0.1247363 | cg21943117 | 1  | 0.008948857 |
| -0.1245223 | cg12895857 | 6  | 0.000124944 |
| -0.124473  | cg14276133 | 9  | 0.000775618 |
| -0.1244497 | cg22726373 | 15 | 0.000864546 |
| -0.124426  | cg19399285 | 10 | 0.000406447 |
| -0.1243759 | cg01577678 | 16 | 0.002446209 |
| -0.1240393 | cg04014685 | 3  | 0.002214513 |
| -0.1239549 | cg14111334 | 11 | 1.07E-05    |
| -0.1237891 | cg10564001 | 13 | 4.61E-05    |
| -0.1237415 | cg18082362 | 3  | 0.00393868  |
| -0.1234005 | cg06915667 | 3  | 0.000498237 |
| -0.1233984 | cg19791637 | 2  | 4.16E-05    |
| -0.1233889 | cg16428517 | 16 | 3.73E-05    |
| -0.1233029 | cg27282397 | 2  | 0.003134502 |
| -0.1230557 | cg04522310 | 16 | 0.048880089 |
| -0.1229006 | cg07611933 | 16 | 0.001777565 |
| -0.1227864 | cg12807764 | 5  | 0.003644673 |
| -0.1227038 | cg19440115 | 15 | 3.86E-05    |
| -0.1226392 | cg14403090 | 7  | 0.000229467 |
| -0.122405  | cg05091997 | 17 | 0.000360517 |
| -0.1223423 | cg22929787 | 5  | 0.005765853 |
| -0.1221579 | cg13636014 | 9  | 3.84E-05    |
| -0.1220995 | cg15244778 | 11 | 0.004413762 |
| -0.1219696 | cg10519417 | 17 | 0.019547028 |
| -0.1219617 | cg26248066 | 11 | 0.039137841 |
| -0.1218503 | cg25747670 | 1  | 0.002317071 |
| -0.1218186 | cg25738326 | 15 | 0.006696499 |
| -0.1217614 | cg05494668 | 11 | 0.000968712 |
| -0.1215669 | cg27449200 | 15 | 0.017891239 |
| -0.1214529 | cg09749788 | 8  | 2.27E-06    |
| -0.1213174 | cg09362047 | 17 | 0.001345899 |
| -0.1212075 | cg09135529 | 11 | 0.00078394  |
| -0.1211489 | cg11586930 | 1  | 0.000902822 |
| -0.1210985 | cg06993307 | 16 | 0.046057301 |
| -0.1210742 | cg13155421 | 3  | 0.000761669 |
| -0.1210462 | cg25806932 | 2  | 0.006810177 |
| -0.1210052 | cg05306029 | 2  | 0.000163894 |
| -0.1209518 | cg00722081 | 10 | 1.58E-05    |
| -0.120877  | cg01627212 | 16 | 0.00225941  |
| -0.1207457 | cg14758525 | 18 | 7.14E-06    |
| -0.1206042 | cg00050294 | 1  | 0.00276963  |
| -0.1205564 | cg04003883 | 2  | 0.000275594 |
| -0.1204667 | cg02369775 | 12 | 4.12E-06    |
| -0.1201962 | cg23010507 | 5  | 6.57E-05    |
| -0.1199484 | cg24680415 | 17 | 4.85E-05    |
| -0.1199027 | cg12593746 | 1  | 0.036553908 |

|            |            |    |             |
|------------|------------|----|-------------|
| -0.119852  | cg12591668 | 1  | 0.040532132 |
| -0.119755  | cg02608831 | 8  | 0.004314121 |
| -0.1197117 | cg09588074 | 13 | 1.90E-05    |
| -0.1196546 | cg09564361 | 8  | 0.040131304 |
| -0.1196457 | cg07463445 | 8  | 0.000221885 |
| -0.1196025 | cg20170943 | 10 | 0.000519596 |
| -0.1195854 | cg00351119 | 6  | 0.00754341  |
| -0.1195823 | cg02352281 | 3  | 0.02526254  |
| -0.1195403 | cg02223135 | 3  | 0.003199912 |
| -0.1195109 | cg20223392 | 8  | 0.000911945 |
| -0.1194687 | cg00902464 | 1  | 0.000449312 |
| -0.1193917 | cg15624719 | 4  | 0.004948866 |
| -0.1193728 | cg17411016 | 2  | 0.004200864 |
| -0.1193238 | cg27365991 | 5  | 0.009772245 |
| -0.1191813 | cg03453870 | 15 | 0.001208256 |
| -0.1190218 | cg03411579 | 12 | 0.001166971 |
| -0.1189492 | cg00960906 | 5  | 0.000458204 |
| -0.1188113 | cg02914097 | 3  | 0.008994964 |
| -0.1187853 | cg22846991 | 10 | 0.000261067 |
| -0.1187414 | cg09478002 | 2  | 0.000433918 |
| -0.1187175 | cg14183602 | 14 | 6.91E-05    |
| -0.1184007 | cg03201337 | 10 | 0.0008993   |
| -0.1183045 | cg00259234 | 17 | 4.66E-06    |
| -0.1182632 | cg00960147 | 1  | 0.002361328 |
| -0.1181596 | cg00302763 | 15 | 4.52E-06    |
| -0.117999  | cg07698039 | 10 | 0.000155381 |
| -0.1179644 | cg09989996 | 1  | 7.64E-05    |
| -0.1179561 | cg18671932 | 6  | 2.72E-05    |
| -0.1177244 | cg16765129 | 3  | 0.002274906 |
| -0.1177123 | cg03781748 | 10 | 8.19E-05    |
| -0.1176827 | cg18764358 | 7  | 6.38E-05    |
| -0.117675  | cg11422851 | 8  | 0.000161977 |
| -0.1175576 | cg27492584 | 17 | 0.024389975 |
| -0.1175123 | cg27227317 | 2  | 0.003896998 |
| -0.1173895 | cg10284310 | 11 | 6.24E-05    |
| -0.1173699 | cg10290728 | 7  | 8.81E-07    |
| -0.1173423 | cg14189441 | 10 | 0.000580049 |
| -0.1170977 | cg07673979 | 17 | 0.009425331 |
| -0.1170141 | cg01619416 | 16 | 0.005730768 |
| -0.1170032 | cg07356549 | 1  | 0.024112931 |
| -0.1169294 | cg11630152 | 7  | 0.002749537 |
| -0.1168673 | cg21197796 | 9  | 0.000564595 |
| -0.1168258 | cg10728473 | 3  | 4.98E-05    |
| -0.116823  | cg14186944 | 9  | 4.27E-05    |
| -0.1167533 | cg07708521 | 5  | 0.001479341 |
| -0.11661   | cg03466587 | 3  | 0.001668307 |

|            |            |    |             |
|------------|------------|----|-------------|
| -0.116517  | cg14223856 | 9  | 8.45E-05    |
| -0.1162856 | cg21653474 | 6  | 0.000119091 |
| -0.1162702 | cg01871631 | 8  | 0.002194818 |
| -0.1162489 | cg12176793 | 8  | 0.000231434 |
| -0.1161788 | cg20676788 | 13 | 0.001308849 |
| -0.1160944 | cg06484100 | 17 | 0.000634863 |
| -0.1160764 | cg25773259 | 12 | 0.001327793 |
| -0.116065  | cg22453826 | 6  | 2.39E-06    |
| -0.1160553 | cg25233271 | 17 | 9.45E-06    |
| -0.1159667 | cg18332838 | 8  | 0.000505877 |
| -0.115906  | cg16308270 | 1  | 0.000287837 |
| -0.1158613 | cg07404223 | 16 | 3.87E-05    |
| -0.1157855 | cg16161415 | 4  | 6.38E-06    |
| -0.1157848 | cg11435651 | 7  | 0.00044364  |
| -0.115707  | cg08454015 | 1  | 0.002533906 |
| -0.1157029 | cg08858426 | 17 | 0.003029607 |
| -0.1156866 | cg04031093 | 1  | 0.033054401 |
| -0.115635  | cg18866210 | 15 | 0.001467991 |
| -0.1156279 | cg03176917 | 19 | 0.03566574  |
| -0.1154955 | cg13306815 | 6  | 1.73E-05    |
| -0.1153495 | cg02142926 | 6  | 0.009522128 |
| -0.1153218 | cg23172080 | 5  | 0.00021291  |
| -0.1152646 | cg07812957 | 19 | 0.002709433 |
| -0.1152112 | cg03002688 | 4  | 0.02490717  |
| -0.1151723 | cg20421940 | 6  | 0.003551009 |
| -0.1151353 | cg03185794 | 13 | 0.002270183 |
| -0.1150166 | cg06932535 | 14 | 0.000123119 |
| -0.114941  | cg22373770 | 1  | 0.004648552 |
| -0.1149409 | cg18257574 | 2  | 0.002684987 |
| -0.1149032 | cg01768201 | 5  | 0.014850775 |
| -0.1147685 | cg11539857 | 6  | 7.30E-05    |
| -0.1147553 | cg03568607 | 13 | 1.60E-06    |
| -0.1147117 | cg07201475 | 2  | 0.028278877 |
| -0.1146307 | cg18886274 | 7  | 0.000489605 |
| -0.1146213 | cg22614521 | 6  | 4.64E-05    |
| -0.1146116 | cg11176481 | 5  | 0.016532882 |
| -0.1145226 | cg17418276 | 11 | 0.011006084 |
| -0.1145027 | cg01723892 | 1  | 8.11E-05    |
| -0.1144982 | cg24939196 | 6  | 0.006613291 |
| -0.1144909 | cg12192282 | 2  | 0.008582921 |
| -0.1144721 | cg10017260 | 10 | 0.009832319 |
| -0.1144694 | cg11018604 | 5  | 0.000106049 |
| -0.114469  | cg25439798 | 21 | 2.75E-05    |
| -0.1144524 | cg04810745 | 2  | 0.000913792 |
| -0.1143724 | cg10149296 | 2  | 0.003938556 |
| -0.1143007 | cg03491895 | 2  | 0.002076945 |



|            |            |    |             |
|------------|------------|----|-------------|
| -0.1142312 | cg26426334 | 1  | 0.001290577 |
| -0.1142052 | cg10134799 | 6  | 0.002649747 |
| -0.1141617 | cg11370814 | 2  | 0.002794734 |
| -0.1140438 | cg19072957 | 10 | 0.001339446 |
| -0.1140187 | cg18816426 | 14 | 9.34E-05    |
| -0.1140141 | cg13017929 | 7  | 0.000135153 |
| -0.1138121 | cg08717751 | 13 | 8.96E-05    |
| -0.1138087 | cg24876404 | 2  | 3.24E-05    |
| -0.1136454 | cg12378001 | 7  | 0.000119091 |
| -0.1135346 | cg13106758 | 15 | 0.015155096 |
| -0.1135306 | cg11234688 | 2  | 0.010933348 |
| -0.1134474 | cg25104233 | 2  | 0.001753556 |
| -0.1133209 | cg13105110 | 13 | 3.99E-06    |
| -0.1132617 | cg24979203 | 2  | 0.000112048 |
| -0.1132339 | cg17165759 | 1  | 0.001383402 |
| -0.1131874 | cg05575505 | 15 | 3.75E-05    |
| -0.1130707 | cg07979348 | 20 | 1.41E-05    |
| -0.1129508 | cg26971423 | 15 | 0.002445585 |
| -0.1129485 | cg25983901 | 7  | 0.001726262 |
| -0.1129423 | cg16598679 | 14 | 0.005487644 |
| -0.1129222 | cg08878651 | 17 | 0.001836068 |
| -0.1128807 | cg18263166 | 7  | 0.016455782 |
| -0.1128496 | cg20405742 | 6  | 0.00100776  |
| -0.1128047 | cg10598503 | 3  | 0.004077911 |
| -0.1127131 | cg06065019 | 2  | 2.73E-05    |
| -0.1125623 | cg01608731 | 20 | 0.001605539 |
| -0.1125097 | cg23542902 | 3  | 0.000459237 |
| -0.1124542 | cg06581409 | 19 | 0.000350404 |
| -0.1123771 | cg10855978 | 8  | 0.000106307 |
| -0.1122939 | cg02698668 | 19 | 0.00040578  |
| -0.1121701 | cg06966245 | 1  | 2.30E-05    |
| -0.1121414 | cg07807757 | 7  | 0.009764315 |
| -0.1121074 | cg03165356 | 2  | 0.011428068 |
| -0.1120498 | cg16783186 | 2  | 0.011913044 |
| -0.1120152 | cg12079115 | 2  | 0.000390528 |
| -0.1119487 | cg17922998 | 8  | 0.033615702 |
| -0.1119074 | cg24178897 | 14 | 0.002658413 |
| -0.1116675 | cg19530168 | 11 | 0.001176063 |
| -0.1116149 | cg23883632 | 14 | 0.036423645 |
| -0.1115814 | cg07980854 | 20 | 0.000881661 |
| -0.111531  | cg07144408 | 5  | 0.000270952 |
| -0.1114399 | cg10577819 | 2  | 9.76E-05    |
| -0.1112463 | cg21946631 | 7  | 0.002100571 |
| -0.111246  | cg03896685 | 7  | 0.00035757  |
| -0.1111354 | cg07485423 | 4  | 0.002911753 |
| -0.1110979 | cg11986760 | 2  | 1.04E-07    |

|            |            |    |             |
|------------|------------|----|-------------|
| -0.1110635 | cg18810022 | 2  | 4.51E-05    |
| -0.1109867 | cg04981501 | 16 | 0.000535375 |
| -0.110963  | cg05979457 | 8  | 0.020459457 |
| -0.1108999 | cg06761220 | 2  | 3.88E-05    |
| -0.1108041 | cg24870483 | 2  | 3.33E-05    |
| -0.1107502 | cg03097134 | 6  | 0.000208802 |
| -0.1106976 | cg19778236 | 5  | 0.000704546 |
| -0.1106247 | cg17033891 | 3  | 0.043751503 |
| -0.1106061 | cg12217954 | 11 | 0.000227122 |
| -0.1105859 | cg08564522 | 19 | 0.000122798 |
| -0.1105368 | cg00874032 | 3  | 6.29E-06    |
| -0.11049   | cg20609883 | 10 | 0.000331857 |
| -0.1104541 | cg10600730 | 20 | 0.000309345 |
| -0.1104394 | cg20387775 | 6  | 8.65E-06    |
| -0.1104306 | cg25388800 | 5  | 0.033360492 |
| -0.1102535 | cg08035694 | 1  | 5.98E-05    |
| -0.1102287 | cg26182406 | 14 | 9.53E-05    |
| -0.110168  | cg14691971 | 8  | 0.000581533 |
| -0.1101069 | cg24980709 | 2  | 0.000360517 |
| -0.1101046 | cg08447373 | 5  | 0.000338621 |
| -0.1099776 | cg20312077 | 8  | 0.000149204 |
| -0.1098408 | cg14702960 | 12 | 1.21E-07    |
| -0.1098351 | cg03312117 | 2  | 0.007096509 |
| -0.1097783 | cg18489994 | 4  | 0.007277752 |
| -0.1097738 | cg10900663 | 14 | 0.000585552 |
| -0.1097689 | cg02924234 | 2  | 0.005766009 |
| -0.1096828 | cg12307200 | 3  | 0.000382786 |
| -0.1096417 | cg01974549 | 2  | 0.000799207 |
| -0.1095912 | cg21324402 | 6  | 0.000210925 |
| -0.1095631 | cg15317049 | 21 | 0.002348902 |
| -0.1095284 | cg13366863 | 5  | 1.41E-05    |
| -0.1095029 | cg15025379 | 11 | 6.26E-05    |
| -0.1093327 | cg25361506 | 1  | 1.06E-05    |
| -0.109168  | cg13410764 | 9  | 0.002205934 |
| -0.1091281 | cg21255880 | 6  | 8.43E-05    |
| -0.109049  | cg23425762 | 18 | 0.012122753 |
| -0.1089793 | cg26196626 | 8  | 0.001199262 |
| -0.1089217 | cg26113233 | 5  | 9.90E-05    |
| -0.1087697 | cg24632480 | 10 | 0.00025232  |
| -0.1087275 | cg12534147 | 5  | 0.013004762 |
| -0.1086762 | cg11721349 | 6  | 0.000301958 |
| -0.1085233 | cg08381046 | 5  | 0.000511724 |
| -0.1084569 | cg14414911 | 6  | 6.49E-05    |
| -0.1084366 | cg11667061 | 14 | 0.002962072 |
| -0.1083931 | cg02138953 | 10 | 0.00162401  |
| -0.1083736 | cg26572896 | 2  | 0.00056504  |

|            |            |    |             |
|------------|------------|----|-------------|
| -0.1083363 | cg04476427 | 5  | 3.49E-05    |
| -0.1082984 | cg04399631 | 3  | 0.000671376 |
| -0.1082586 | cg14054279 | 3  | 2.49E-05    |
| -0.1081613 | cg16596317 | 1  | 0.017139524 |
| -0.1081211 | cg02849956 | 19 | 0.001419606 |
| -0.1081037 | cg02235918 | 6  | 0.001039433 |
| -0.1081009 | cg26456304 | 15 | 1.01E-06    |
| -0.1080637 | cg04799980 | 2  | 0.000417853 |
| -0.1080308 | cg00986910 | 3  | 5.50E-05    |
| -0.1079891 | cg04926881 | 7  | 0.008941875 |
| -0.1079112 | cg09232358 | 14 | 1.91E-06    |
| -0.1078423 | cg12457659 | 21 | 0.000978993 |
| -0.1077823 | cg10327067 | 8  | 0.000134906 |
| -0.1076947 | cg14059464 | 2  | 1.88E-05    |
| -0.1075922 | cg21832142 | 3  | 4.25E-05    |
| -0.1075848 | cg11645465 | 8  | 5.65E-07    |
| -0.1075637 | cg01993552 | 19 | 3.24E-05    |
| -0.1075562 | cg11760395 | 10 | 0.000360273 |
| -0.1075227 | cg26123824 | 10 | 5.12E-05    |
| -0.1074777 | cg24486958 | 1  | 0.000211115 |
| -0.1073985 | cg19532942 | 14 | 8.49E-05    |
| -0.1072951 | cg04139043 | 1  | 0.00015009  |
| -0.107249  | cg00657780 | 16 | 0.000947364 |
| -0.1072303 | cg08474826 | 1  | 0.002043631 |
| -0.1072179 | cg09654261 | 11 | 5.42E-05    |
| -0.107216  | cg16074990 | 2  | 0.036756489 |
| -0.1071808 | cg10097313 | 14 | 0.000629342 |
| -0.1071668 | cg07617237 | 6  | 0.002069295 |
| -0.1071361 | cg17396797 | 2  | 0.000168465 |
| -0.1071047 | cg13988455 | 10 | 0.000357448 |
| -0.1070481 | cg02153681 | 2  | 1.75E-05    |
| -0.107005  | cg14378231 | 1  | 0.00071545  |
| -0.1069053 | cg14434062 | 15 | 0.038668233 |
| -0.1068349 | cg15457481 | 4  | 0.000225975 |
| -0.10672   | cg09221159 | 10 | 9.93E-05    |
| -0.1066822 | cg12232146 | 12 | 8.26E-06    |
| -0.1065867 | cg07817608 | 12 | 0.00063919  |
| -0.1065683 | cg16747928 | 6  | 1.22E-05    |
| -0.1063039 | cg07866909 | 2  | 5.62E-05    |
| -0.1062464 | cg15840891 | 2  | 0.007005897 |
| -0.1062462 | cg01117339 | 11 | 0.004024883 |
| -0.106218  | cg02974085 | 1  | 4.07E-05    |
| -0.1061744 | cg07243202 | 8  | 0.001090862 |
| -0.1058846 | cg05979766 | 5  | 0.001622305 |
| -0.1058765 | cg24045357 | 2  | 0.002412627 |
| -0.1058544 | cg22192489 | 5  | 0.01256261  |

|            |            |    |             |
|------------|------------|----|-------------|
| -0.1057075 | cg25616869 | 3  | 1.04E-05    |
| -0.1056798 | cg13076829 | 18 | 6.30E-05    |
| -0.1055972 | cg21308365 | 6  | 0.004769362 |
| -0.1055376 | cg06677367 | 11 | 2.46E-05    |
| -0.1055268 | cg18100045 | 3  | 0.000417719 |
| -0.1053377 | cg15835664 | 1  | 2.14E-05    |
| -0.1052588 | cg14713217 | 1  | 1.85E-06    |
| -0.1052331 | cg26557617 | 17 | 0.000223226 |
| -0.1050783 | cg16578085 | 4  | 0.002941958 |
| -0.1050677 | cg00998372 | 2  | 0.003547283 |
| -0.1050238 | cg04783450 | 6  | 5.99E-05    |
| -0.1049983 | cg07559178 | 14 | 7.57E-05    |
| -0.1049346 | cg05234552 | 6  | 0.002174245 |
| -0.1048753 | cg00975624 | 3  | 0.005219152 |
| -0.1047124 | cg01889956 | 6  | 5.02E-05    |
| -0.1046798 | cg00150785 | 20 | 0.000115284 |
| -0.1046313 | cg25500001 | 10 | 0.000246542 |
| -0.1046091 | cg25827670 | 17 | 0.000378148 |
| -0.1045756 | cg03772020 | 6  | 0.042823396 |
| -0.1045125 | cg05176551 | 10 | 4.13E-06    |
| -0.1045022 | cg13638282 | 9  | 4.39E-05    |
| -0.1044985 | cg16704703 | 10 | 0.002910801 |
| -0.1044175 | cg05581878 | 3  | 0.000899717 |
| -0.1043712 | cg16700163 | 16 | 0.015706693 |
| -0.1043453 | cg12028646 | 20 | 0.000251572 |
| -0.1043027 | cg14184954 | 12 | 3.33E-05    |
| -0.1042849 | cg23598010 | 12 | 4.44E-06    |
| -0.1042446 | cg16479476 | 6  | 1.19E-05    |
| -0.1042275 | cg17186132 | 15 | 7.05E-06    |
| -0.1041976 | cg16651768 | 1  | 6.97E-06    |
| -0.1041963 | cg05626644 | 16 | 0.000153891 |
| -0.10416   | cg27109912 | 17 | 3.02E-05    |
| -0.1041007 | cg09244312 | 13 | 0.000473603 |
| -0.1041004 | cg12341429 | 2  | 9.63E-06    |
| -0.1040447 | cg01806427 | 5  | 0.022800301 |
| -0.104039  | cg22950831 | 10 | 4.32E-05    |
| -0.1040045 | cg01957897 | 15 | 3.33E-06    |
| -0.1039981 | cg07081245 | 11 | 1.39E-05    |
| -0.1039884 | cg08698943 | 10 | 0.003388913 |
| -0.1039171 | cg16973527 | 15 | 0.012741015 |
| -0.1038465 | cg19867579 | 2  | 0.000324294 |
| -0.1038294 | cg03254336 | 10 | 2.00E-06    |
| -0.1038228 | cg13446584 | 7  | 0.000281141 |
| -0.1035648 | cg06223926 | 10 | 0.000257397 |
| -0.1035606 | cg24232510 | 2  | 9.23E-05    |
| -0.1033722 | cg20788020 | 8  | 3.06E-05    |

|            |            |    |             |
|------------|------------|----|-------------|
| -0.1033657 | cg06361606 | 1  | 0.000410602 |
| -0.1033426 | cg05977333 | 16 | 0.00735014  |
| -0.1033284 | cg09884419 | 15 | 0.00257954  |
| -0.1032745 | cg01510278 | 16 | 0.005571346 |
| -0.1032719 | cg14684854 | 2  | 1.49E-05    |
| -0.1032476 | cg13052638 | 1  | 3.02E-05    |
| -0.1031475 | cg06480353 | 7  | 9.99E-07    |
| -0.1031322 | cg26118358 | 14 | 0.006679142 |
| -0.1030355 | cg03278514 | 15 | 0.002733853 |
| -0.1029803 | cg08913523 | 8  | 0.005084296 |
| -0.1028442 | cg09051342 | 8  | 4.82E-05    |
| -0.1027655 | cg11818589 | 10 | 0.0222961   |
| -0.1027386 | cg22021794 | 5  | 1.22E-05    |
| -0.102661  | cg25765315 | 12 | 9.59E-05    |
| -0.1026172 | cg15867307 | 2  | 6.01E-06    |
| -0.1026004 | cg25467833 | 1  | 0.000277755 |
| -0.1025974 | cg02744632 | 2  | 0.000114347 |
| -0.1025714 | cg14488466 | 9  | 0.001331339 |
| -0.1025697 | cg27661394 | 4  | 3.43E-05    |
| -0.1023868 | cg20485607 | 1  | 0.013433453 |
| -0.1023051 | cg16474118 | 2  | 0.000693941 |
| -0.1022682 | cg01878963 | 1  | 1.01E-06    |
| -0.1022397 | cg07285237 | 6  | 0.000277931 |
| -0.101987  | cg05273533 | 16 | 0.000135153 |
| -0.1018981 | cg04143120 | 11 | 3.33E-06    |
| -0.1018234 | cg03127349 | 10 | 3.91E-06    |
| -0.1017959 | cg16171290 | 13 | 3.99E-06    |
| -0.1016343 | cg15812586 | 7  | 0.004591146 |
| -0.1014268 | cg03666350 | 2  | 3.56E-06    |
| -0.101304  | cg27621721 | 3  | 1.04E-05    |
| -0.1012557 | cg17477578 | 8  | 0.000140489 |
| -0.1011773 | cg15732079 | 7  | 8.69E-06    |
| -0.1011082 | cg22534374 | 1  | 0.000140947 |
| -0.1010759 | cg11601932 | 3  | 0.000248194 |
| -0.1009998 | cg24822529 | 5  | 1.17E-06    |
| -0.1009794 | cg07484739 | 2  | 1.01E-06    |
| -0.1009785 | cg04362790 | 14 | 4.27E-07    |
| -0.1009503 | cg16440978 | 14 | 3.38E-06    |
| -0.1008889 |            |    |             |
| -0.1008612 |            |    |             |
| -0.100848  |            |    |             |
| -0.1008239 |            |    |             |
| -0.1007363 |            |    |             |
| -0.1006988 |            |    |             |
| -0.1005641 |            |    |             |
| -0.1005438 |            |    |             |

-0.1005074  
-0.1005056  
-0.1004415  
-0.1003544  
-0.1001302  
-0.1001279  
-0.1000928  
-0.1000764

**oarthritis**

| <b>Mean <math>\beta</math>-value<br/>NOF</b> | <b>Mean <math>\beta</math>-value<br/>OA.Hip<br/>samples</b> | <b>Delta.Beta</b> |
|----------------------------------------------|-------------------------------------------------------------|-------------------|
| 0.747286665                                  | 0.638203026                                                 | 0.10908364        |
| 0.796189794                                  | 0.694108513                                                 | 0.10208128        |
| 0.730878993                                  | 0.582625886                                                 | 0.14825311        |
| 0.532159139                                  | 0.309109791                                                 | 0.22304935        |
| 0.864218943                                  | 0.746730216                                                 | 0.11748873        |
| 0.88448214                                   | 0.772916359                                                 | 0.11156578        |
| 0.873924421                                  | 0.713285565                                                 | 0.16063886        |
| 0.665249913                                  | 0.556882755                                                 | 0.10836716        |
| 0.371465412                                  | 0.268629481                                                 | 0.10283593        |
| 0.57171392                                   | 0.420613216                                                 | 0.1511007         |
| 0.657310127                                  | 0.493716683                                                 | 0.16359344        |
| 0.868325038                                  | 0.745967181                                                 | 0.12235786        |
| 0.505959944                                  | 0.387461515                                                 | 0.11849843        |
| 0.785679773                                  | 0.658552864                                                 | 0.12712691        |
| 0.523511062                                  | 0.384448656                                                 | 0.13906241        |
| 0.704441614                                  | 0.4766596                                                   | 0.22778201        |
| 0.352490571                                  | 0.235502437                                                 | 0.11698813        |
| 0.518765218                                  | 0.374800525                                                 | 0.14396469        |
| 0.898178494                                  | 0.791553024                                                 | 0.10662547        |
| 0.844861629                                  | 0.718564699                                                 | 0.12629693        |
| 0.791151616                                  | 0.661357951                                                 | 0.12979367        |
| 0.837977775                                  | 0.683669579                                                 | 0.1543082         |
| 0.601372889                                  | 0.435976765                                                 | 0.16539612        |
| 0.386301913                                  | 0.224754845                                                 | 0.16154707        |
| 0.659798805                                  | 0.522164835                                                 | 0.13763397        |
| 0.858220685                                  | 0.755943706                                                 | 0.10227698        |
| 0.546115869                                  | 0.428345945                                                 | 0.11776992        |
| 0.758618619                                  | 0.607877797                                                 | 0.15074082        |
| 0.865451892                                  | 0.763338203                                                 | 0.10211369        |
| 0.586325619                                  | 0.451918071                                                 | 0.13440755        |
| 0.545545837                                  | 0.408797388                                                 | 0.13674845        |
| 0.667523002                                  | 0.522091923                                                 | 0.14543108        |
| 0.816931383                                  | 0.646152363                                                 | 0.17077902        |
| 0.813256967                                  | 0.68293604                                                  | 0.13032093        |
| 0.586855414                                  | 0.428216997                                                 | 0.15863842        |
| 0.719158411                                  | 0.613756597                                                 | 0.10540181        |
| 0.748512039                                  | 0.619176735                                                 | 0.1293353         |
| 0.748558945                                  | 0.603344742                                                 | 0.1452142         |
| 0.699175187                                  | 0.52880733                                                  | 0.17036786        |

|             |             |            |
|-------------|-------------|------------|
| 0.832383947 | 0.658188263 | 0.17419568 |
| 0.678661469 | 0.570914759 | 0.10774671 |
| 0.635490302 | 0.45855755  | 0.17693275 |
| 0.602927802 | 0.47874684  | 0.12418096 |
| 0.817566199 | 0.713451589 | 0.10411461 |
| 0.636078264 | 0.531473553 | 0.10460471 |
| 0.843808003 | 0.732203797 | 0.11160421 |
| 0.698827711 | 0.597706551 | 0.10112116 |
| 0.296434475 | 0.164040885 | 0.13239359 |
| 0.66898478  | 0.465270067 | 0.20371471 |
| 0.849700283 | 0.736313846 | 0.11338644 |
| 0.502216722 | 0.378064989 | 0.12415173 |
| 0.368648075 | 0.21901243  | 0.14963564 |
| 0.783679623 | 0.674524716 | 0.10915491 |
| 0.561250169 | 0.453428932 | 0.10782124 |
| 0.827327582 | 0.726688928 | 0.10063865 |
| 0.794694164 | 0.689801248 | 0.10489292 |
| 0.598084502 | 0.48110588  | 0.11697862 |
| 0.523271238 | 0.369305226 | 0.15396601 |
| 0.700019981 | 0.585979691 | 0.11404029 |
| 0.522360767 | 0.344429944 | 0.17793082 |
| 0.706690334 | 0.521015664 | 0.18567467 |
| 0.754910265 | 0.623437862 | 0.1314724  |
| 0.303694668 | 0.193545089 | 0.11014958 |
| 0.709771051 | 0.607716933 | 0.10205412 |
| 0.383532181 | 0.279118505 | 0.10441368 |
| 0.845841479 | 0.698638241 | 0.14720324 |
| 0.760312515 | 0.549052922 | 0.21125959 |
| 0.461170962 | 0.357243137 | 0.10392783 |
| 0.777002577 | 0.655737598 | 0.12126498 |
| 0.558208451 | 0.431145231 | 0.12706322 |
| 0.602385072 | 0.501970427 | 0.10041465 |
| 0.595254153 | 0.372521741 | 0.22273241 |
| 0.49850826  | 0.367493368 | 0.13101489 |
| 0.502379589 | 0.378255975 | 0.12412361 |
| 0.79677765  | 0.691277755 | 0.10549989 |
| 0.628954905 | 0.442951154 | 0.18600375 |
| 0.803605439 | 0.701058419 | 0.10254702 |
| 0.689054966 | 0.424058877 | 0.26499609 |
| 0.79305347  | 0.690598928 | 0.10245454 |
| 0.78772045  | 0.661773063 | 0.12594739 |
| 0.510393725 | 0.340299925 | 0.1700938  |
| 0.60643681  | 0.483846135 | 0.12259068 |
| 0.493227212 | 0.362526393 | 0.13070082 |
| 0.471672263 | 0.368600978 | 0.10307129 |
| 0.623161321 | 0.490071728 | 0.13308959 |



|             |             |            |
|-------------|-------------|------------|
| 0.274161859 | 0.147816229 | 0.12634563 |
| 0.696998603 | 0.545260395 | 0.15173821 |
| 0.811104986 | 0.623517633 | 0.18758735 |
| 0.663333625 | 0.560588075 | 0.10274555 |
| 0.869182312 | 0.738176082 | 0.13100623 |
| 0.456397774 | 0.29379921  | 0.16259856 |
| 0.681044144 | 0.450169662 | 0.23087448 |
| 0.343099187 | 0.21781431  | 0.12528488 |
| 0.411537476 | 0.2480278   | 0.16350968 |
| 0.624443052 | 0.48613807  | 0.13830498 |
| 0.691293831 | 0.561811194 | 0.12948264 |
| 0.417602661 | 0.301693132 | 0.11590953 |
| 0.518178026 | 0.375222221 | 0.14295581 |
| 0.635557097 | 0.491426025 | 0.14413107 |
| 0.867221752 | 0.719405578 | 0.14781617 |
| 0.855610658 | 0.699402895 | 0.15620776 |
| 0.670021693 | 0.50010762  | 0.16991407 |
| 0.757458486 | 0.576839505 | 0.18061898 |
| 0.67663281  | 0.559967438 | 0.11666537 |
| 0.32338835  | 0.214947769 | 0.10844058 |
| 0.618522552 | 0.502979049 | 0.1155435  |
| 0.89026363  | 0.754277063 | 0.13598657 |
| 0.769683841 | 0.541163652 | 0.22852019 |
| 0.87413897  | 0.768998179 | 0.10514079 |
| 0.348503892 | 0.238815101 | 0.10968879 |
| 0.501250465 | 0.354382491 | 0.14686798 |
| 0.709108794 | 0.550066698 | 0.1590421  |
| 0.789517861 | 0.613534734 | 0.17598313 |
| 0.680250102 | 0.571467715 | 0.10878239 |
| 0.832370468 | 0.683003187 | 0.14936728 |
| 0.514345185 | 0.265703891 | 0.24864129 |
| 0.786894417 | 0.683677128 | 0.10321729 |
| 0.335279428 | 0.186872994 | 0.14840643 |
| 0.73843535  | 0.620740014 | 0.11769534 |
| 0.677880466 | 0.577115773 | 0.10076469 |
| 0.486929696 | 0.386301102 | 0.10062859 |
| 0.48807209  | 0.381350061 | 0.10672203 |
| 0.728036885 | 0.624358962 | 0.10367792 |
| 0.693488648 | 0.399212877 | 0.29427577 |
| 0.883598025 | 0.770376194 | 0.11322183 |
| 0.607919277 | 0.405418359 | 0.20250092 |
| 0.572256063 | 0.420635138 | 0.15162093 |
| 0.576030316 | 0.414906933 | 0.16112338 |
| 0.741229856 | 0.638483735 | 0.10274612 |
| 0.865844645 | 0.70071848  | 0.16512617 |
| 0.883187993 | 0.712428809 | 0.17075918 |

|             |             |            |
|-------------|-------------|------------|
| 0.604119424 | 0.493118923 | 0.1110005  |
| 0.754602937 | 0.650123846 | 0.10447909 |
| 0.436350186 | 0.268125334 | 0.16822485 |
| 0.547882416 | 0.420272153 | 0.12761026 |
| 0.496105056 | 0.372941077 | 0.12316398 |
| 0.540096165 | 0.416964474 | 0.12313169 |
| 0.521007156 | 0.370440193 | 0.15056696 |
| 0.641756614 | 0.468279493 | 0.17347712 |
| 0.928188905 | 0.827823096 | 0.10036581 |
| 0.750453773 | 0.589801861 | 0.16065191 |
| 0.366350476 | 0.24190704  | 0.12444344 |
| 0.822873465 | 0.722426346 | 0.10044712 |
| 0.562351842 | 0.454468786 | 0.10788306 |
| 0.44379587  | 0.24396611  | 0.19982976 |
| 0.554131008 | 0.423642655 | 0.13048835 |
| 0.235864978 | 0.093593019 | 0.14227196 |
| 0.665248266 | 0.458419611 | 0.20682866 |
| 0.820731207 | 0.709672399 | 0.11105881 |
| 0.699296249 | 0.550029593 | 0.14926666 |
| 0.5428676   | 0.37532864  | 0.16753896 |
| 0.385597939 | 0.186402573 | 0.19919537 |
| 0.731841185 | 0.630591313 | 0.10124987 |
| 0.448717529 | 0.309161046 | 0.13955648 |
| 0.316115152 | 0.212853096 | 0.10326206 |
| 0.594835722 | 0.478251009 | 0.11658471 |
| 0.511969477 | 0.334842699 | 0.17712678 |
| 0.4959665   | 0.367506817 | 0.12845968 |
| 0.584381967 | 0.450277926 | 0.13410404 |
| 0.420874688 | 0.289514295 | 0.13136039 |
| 0.76118112  | 0.635854216 | 0.1253269  |
| 0.756729445 | 0.570289274 | 0.18644017 |
| 0.479256117 | 0.367728344 | 0.11152777 |
| 0.776956488 | 0.673228698 | 0.10372779 |
| 0.87499173  | 0.75476676  | 0.12022497 |
| 0.471012734 | 0.337202395 | 0.13381034 |
| 0.875528213 | 0.756957523 | 0.11857069 |
| 0.467977108 | 0.275626003 | 0.1923511  |
| 0.666222049 | 0.558164335 | 0.10805771 |
| 0.44437028  | 0.3254257   | 0.11894458 |
| 0.76969201  | 0.657821849 | 0.11187016 |
| 0.733890471 | 0.62430506  | 0.10958541 |
| 0.602741585 | 0.492099785 | 0.1106418  |
| 0.671134348 | 0.559043172 | 0.11209118 |
| 0.334505424 | 0.22498324  | 0.10952218 |
| 0.33735616  | 0.21786269  | 0.11949347 |
| 0.490762229 | 0.380332471 | 0.11042976 |

|             |             |            |
|-------------|-------------|------------|
| 0.532938338 | 0.314981357 | 0.21795698 |
| 0.739772192 | 0.62375732  | 0.11601487 |
| 0.839352045 | 0.729930274 | 0.10942177 |
| 0.668849772 | 0.544336007 | 0.12451377 |
| 0.648430651 | 0.501148476 | 0.14728218 |
| 0.373224025 | 0.237041392 | 0.13618263 |
| 0.664198896 | 0.560450588 | 0.10374831 |
| 0.378997193 | 0.196075943 | 0.18292125 |
| 0.333770844 | 0.19481575  | 0.13895509 |
| 0.584269094 | 0.4811846   | 0.1030845  |
| 0.401508327 | 0.257824618 | 0.14368371 |
| 0.560269346 | 0.431886506 | 0.12838284 |
| 0.687152841 | 0.565107933 | 0.12204491 |
| 0.773120327 | 0.643866527 | 0.1292538  |
| 0.518570974 | 0.378193338 | 0.14037764 |
| 0.4951089   | 0.379242767 | 0.11586613 |
| 0.657248817 | 0.489099195 | 0.16814962 |
| 0.89970244  | 0.78957544  | 0.110127   |
| 0.895838411 | 0.775852201 | 0.11998621 |
| 0.75574296  | 0.633800793 | 0.12194217 |
| 0.277305125 | 0.163998887 | 0.11330624 |
| 0.612422237 | 0.455583855 | 0.15683838 |
| 0.492640034 | 0.373889546 | 0.11875049 |
| 0.580701746 | 0.456134724 | 0.12456702 |
| 0.439600781 | 0.298079002 | 0.14152178 |
| 0.733455916 | 0.621069216 | 0.1123867  |
| 0.407493583 | 0.292729629 | 0.11476395 |
| 0.815545781 | 0.713666646 | 0.10187914 |
| 0.486244155 | 0.344785554 | 0.1414586  |
| 0.81335877  | 0.70856889  | 0.10478988 |
| 0.74025109  | 0.554266335 | 0.18598476 |
| 0.431739567 | 0.229643532 | 0.20209603 |
| 0.371275036 | 0.228953548 | 0.14232149 |
| 0.606487609 | 0.463936592 | 0.14255102 |
| 0.814848413 | 0.687111292 | 0.12773712 |
| 0.541886802 | 0.409930522 | 0.13195628 |
| 0.787242163 | 0.685209861 | 0.1020323  |
| 0.758462175 | 0.55448858  | 0.2039736  |
| 0.667817202 | 0.566794058 | 0.10102314 |
| 0.559038116 | 0.434605569 | 0.12443255 |
| 0.531297489 | 0.405474942 | 0.12582255 |
| 0.353685026 | 0.234800437 | 0.11888459 |
| 0.275799261 | 0.172665352 | 0.10313391 |
| 0.313371692 | 0.189971782 | 0.12339991 |
| 0.469692401 | 0.329404377 | 0.14028802 |
| 0.880494202 | 0.778219599 | 0.1022746  |

|             |             |            |
|-------------|-------------|------------|
| 0.594879545 | 0.491070442 | 0.1038091  |
| 0.889870262 | 0.780288574 | 0.10958169 |
| 0.868767884 | 0.7504257   | 0.11834218 |
| 0.56528626  | 0.396644503 | 0.16864176 |
| 0.568907191 | 0.449110637 | 0.11979655 |
| 0.713526862 | 0.590478078 | 0.12304878 |
| 0.588847398 | 0.432695952 | 0.15615145 |
| 0.617087726 | 0.430858277 | 0.18622945 |
| 0.487558155 | 0.346771551 | 0.1407866  |
| 0.388553882 | 0.280210799 | 0.10834308 |
| 0.550859307 | 0.438258531 | 0.11260078 |
| 0.834969943 | 0.703944057 | 0.13102589 |
| 0.581949576 | 0.387071348 | 0.19487823 |
| 0.514886423 | 0.406721376 | 0.10816505 |
| 0.66941637  | 0.515142313 | 0.15427406 |
| 0.768172897 | 0.610774354 | 0.15739854 |
| 0.795113333 | 0.676542755 | 0.11857058 |
| 0.345239741 | 0.205715655 | 0.13952409 |
| 0.230826129 | 0.113024806 | 0.11780132 |
| 0.457457583 | 0.347738568 | 0.10971902 |
| 0.540640594 | 0.374433386 | 0.16620721 |
| 0.639549241 | 0.533770467 | 0.10577877 |
| 0.275998902 | 0.160811143 | 0.11518776 |
| 0.380531301 | 0.199906211 | 0.18062509 |
| 0.666936303 | 0.564555579 | 0.10238072 |
| 0.682689311 | 0.578819297 | 0.10387002 |
| 0.595606463 | 0.488479167 | 0.1071273  |
| 0.773683392 | 0.656342013 | 0.11734138 |
| 0.382596748 | 0.260143642 | 0.12245311 |
| 0.689732095 | 0.542905803 | 0.14682629 |
| 0.738345679 | 0.637245205 | 0.10110047 |
| 0.547978576 | 0.407974544 | 0.14000403 |
| 0.28618478  | 0.169259035 | 0.11692575 |
| 0.765245985 | 0.580710539 | 0.18453545 |
| 0.483510315 | 0.340118633 | 0.14339168 |
| 0.874034443 | 0.730008972 | 0.14402547 |
| 0.802558975 | 0.64479381  | 0.15776517 |
| 0.752095301 | 0.581833493 | 0.17026181 |
| 0.655531013 | 0.471971129 | 0.18355988 |
| 0.794660937 | 0.686435267 | 0.10822567 |
| 0.736519937 | 0.555406905 | 0.18111303 |
| 0.799484185 | 0.523495851 | 0.27598833 |
| 0.704931596 | 0.588188652 | 0.11674294 |
| 0.824291184 | 0.701129747 | 0.12316144 |
| 0.800487103 | 0.678934052 | 0.12155305 |
| 0.493955587 | 0.39182531  | 0.10213028 |

|             |             |            |
|-------------|-------------|------------|
| 0.596627221 | 0.423981583 | 0.17264564 |
| 0.472460407 | 0.344954934 | 0.12750547 |
| 0.5045844   | 0.363760855 | 0.14082355 |
| 0.881814472 | 0.745893543 | 0.13592093 |
| 0.404312881 | 0.292423211 | 0.11188967 |
| 0.368226957 | 0.238621629 | 0.12960533 |
| 0.751896265 | 0.604151918 | 0.14774435 |
| 0.450773937 | 0.340551468 | 0.11022247 |
| 0.778126699 | 0.598275928 | 0.17985077 |
| 0.469748983 | 0.293292171 | 0.17645681 |
| 0.790486809 | 0.667816999 | 0.12266981 |
| 0.551887269 | 0.390693979 | 0.16119329 |
| 0.751128236 | 0.601973282 | 0.14915495 |
| 0.73112071  | 0.575337016 | 0.15578369 |
| 0.798898307 | 0.640408502 | 0.1584898  |
| 0.652994986 | 0.494447238 | 0.15854775 |
| 0.688639546 | 0.447484591 | 0.24115496 |
| 0.483747679 | 0.360770801 | 0.12297688 |
| 0.471576287 | 0.354011441 | 0.11756485 |
| 0.810650064 | 0.689804257 | 0.12084581 |
| 0.747190821 | 0.644606275 | 0.10258455 |
| 0.846262888 | 0.715579542 | 0.13068335 |
| 0.764798458 | 0.569368532 | 0.19542993 |
| 0.738443859 | 0.621605555 | 0.11683831 |
| 0.812742924 | 0.620668291 | 0.19207463 |
| 0.731892068 | 0.509912108 | 0.22197996 |
| 0.622683383 | 0.460086464 | 0.16259692 |
| 0.570225829 | 0.460889176 | 0.10933665 |
| 0.605642922 | 0.466612194 | 0.13903073 |
| 0.379085154 | 0.226942827 | 0.15214233 |
| 0.724162816 | 0.527713651 | 0.19644917 |
| 0.578558503 | 0.41968433  | 0.15887417 |
| 0.824447129 | 0.723841282 | 0.10060585 |
| 0.683417939 | 0.578140484 | 0.10527746 |
| 0.379734921 | 0.260456462 | 0.11927846 |
| 0.605579967 | 0.414568541 | 0.19101143 |
| 0.807042522 | 0.703184636 | 0.10385789 |
| 0.467101524 | 0.291276145 | 0.17582538 |
| 0.598942398 | 0.494315929 | 0.10462647 |
| 0.676220823 | 0.479930807 | 0.19629002 |
| 0.722911102 | 0.568417007 | 0.1544941  |
| 0.550288191 | 0.353380657 | 0.19690754 |
| 0.449204424 | 0.326557059 | 0.12264737 |
| 0.667694654 | 0.499348102 | 0.16834655 |
| 0.563195756 | 0.400059733 | 0.16313602 |
| 0.480171482 | 0.341484015 | 0.13868747 |

|             |             |            |
|-------------|-------------|------------|
| 0.728963268 | 0.579963086 | 0.14900018 |
| 0.551689103 | 0.442140519 | 0.10954858 |
| 0.80261849  | 0.698093059 | 0.10452543 |
| 0.424809712 | 0.314762156 | 0.11004756 |
| 0.789279823 | 0.679616408 | 0.10966342 |
| 0.544028398 | 0.424805308 | 0.11922309 |
| 0.819372238 | 0.709791021 | 0.10958122 |
| 0.442457397 | 0.310635969 | 0.13182143 |
| 0.834935085 | 0.696233944 | 0.13870114 |
| 0.529227415 | 0.373160605 | 0.15606681 |
| 0.545568325 | 0.392965932 | 0.15260239 |
| 0.560336545 | 0.372371646 | 0.1879649  |
| 0.767344886 | 0.663544034 | 0.10380085 |
| 0.481177785 | 0.293135383 | 0.1880424  |
| 0.650572485 | 0.548017446 | 0.10255504 |
| 0.31901067  | 0.199175275 | 0.1198354  |
| 0.383853908 | 0.278144619 | 0.10570929 |
| 0.584350137 | 0.402648708 | 0.18170143 |
| 0.731282317 | 0.534608809 | 0.19667351 |
| 0.360359219 | 0.217392433 | 0.14296679 |
| 0.498091029 | 0.392971279 | 0.10511975 |
| 0.36104458  | 0.253912991 | 0.10713159 |
| 0.380892946 | 0.202630206 | 0.17826274 |
| 0.536242117 | 0.357872814 | 0.1783693  |
| 0.489776784 | 0.344556955 | 0.14521983 |
| 0.812167498 | 0.687097293 | 0.12507021 |
| 0.24443534  | 0.142297557 | 0.10213778 |
| 0.874015088 | 0.770153505 | 0.10386158 |
| 0.894466787 | 0.772480673 | 0.12198611 |
| 0.855443757 | 0.732109564 | 0.12333419 |
| 0.880036071 | 0.751698134 | 0.12833794 |
| 0.703493007 | 0.547476547 | 0.15601646 |
| 0.883337141 | 0.721726075 | 0.16161107 |
| 0.846827416 | 0.642695894 | 0.20413152 |
| 0.620720505 | 0.476686303 | 0.1440342  |
| 0.621616883 | 0.46395781  | 0.15765907 |
| 0.58161413  | 0.422096208 | 0.15951792 |
| 0.282204997 | 0.154931731 | 0.12727327 |
| 0.493852659 | 0.376032951 | 0.11781971 |
| 0.697317314 | 0.558196798 | 0.13912052 |
| 0.602374192 | 0.41796201  | 0.18441218 |
| 0.816039491 | 0.712420522 | 0.10361897 |
| 0.572673759 | 0.436987772 | 0.13568599 |
| 0.35541292  | 0.235183961 | 0.12022896 |
| 0.795808832 | 0.661211712 | 0.13459712 |
| 0.476886558 | 0.353909907 | 0.12297665 |

|             |             |            |
|-------------|-------------|------------|
| 0.422719084 | 0.316174322 | 0.10654476 |
| 0.519933358 | 0.414980872 | 0.10495249 |
| 0.430029976 | 0.315844148 | 0.11418583 |
| 0.647107982 | 0.512300369 | 0.13480761 |
| 0.439419003 | 0.291008788 | 0.14841022 |
| 0.670509913 | 0.566027431 | 0.10448248 |
| 0.392577297 | 0.286503441 | 0.10607386 |
| 0.65218865  | 0.494952304 | 0.15723635 |
| 0.509376369 | 0.362429624 | 0.14694675 |
| 0.705283757 | 0.590836125 | 0.11444763 |
| 0.703540891 | 0.552815791 | 0.1507251  |
| 0.726368102 | 0.402077943 | 0.32429016 |
| 0.359796125 | 0.251325649 | 0.10847048 |
| 0.393762982 | 0.283454245 | 0.11030874 |
| 0.725704729 | 0.612700139 | 0.11300459 |
| 0.383407058 | 0.21500481  | 0.16840225 |
| 0.321670323 | 0.215625099 | 0.10604523 |
| 0.656451559 | 0.535270363 | 0.1211812  |
| 0.504531587 | 0.360524491 | 0.1440071  |
| 0.765770917 | 0.605958758 | 0.15981216 |
| 0.395088803 | 0.24925445  | 0.14583435 |
| 0.63598854  | 0.513312667 | 0.12267587 |
| 0.37976056  | 0.276532247 | 0.10322831 |
| 0.703343425 | 0.580005624 | 0.1233378  |
| 0.670110181 | 0.551428536 | 0.11868165 |
| 0.824258489 | 0.704434022 | 0.11982447 |
| 0.548556894 | 0.39705936  | 0.15149753 |
| 0.868664777 | 0.73323523  | 0.13542955 |
| 0.389426361 | 0.285152965 | 0.1042734  |
| 0.596696224 | 0.487778889 | 0.10891733 |
| 0.776030809 | 0.595110919 | 0.18091989 |
| 0.841799154 | 0.707777448 | 0.13402171 |
| 0.822779515 | 0.679185823 | 0.14359369 |
| 0.723729245 | 0.562895995 | 0.16083325 |
| 0.783472181 | 0.585838792 | 0.19763339 |
| 0.580746408 | 0.465421598 | 0.11532481 |
| 0.792059672 | 0.688409958 | 0.10364972 |
| 0.818329146 | 0.699033454 | 0.11929569 |
| 0.829391356 | 0.706674181 | 0.12271718 |
| 0.558794231 | 0.431364313 | 0.12742992 |
| 0.737368583 | 0.595256303 | 0.14211228 |
| 0.547644772 | 0.375975018 | 0.17166975 |
| 0.819651762 | 0.684590986 | 0.13506078 |
| 0.808755476 | 0.695519724 | 0.11323575 |
| 0.545996885 | 0.373109163 | 0.17288772 |
| 0.537009643 | 0.413551644 | 0.123458   |

|             |             |            |
|-------------|-------------|------------|
| 0.778161155 | 0.646257085 | 0.13190407 |
| 0.903232419 | 0.795098625 | 0.10813379 |
| 0.686876935 | 0.550370368 | 0.13650657 |
| 0.679587377 | 0.503528277 | 0.1760591  |
| 0.733445404 | 0.626347742 | 0.10709766 |
| 0.850079415 | 0.73737156  | 0.11270786 |
| 0.35294356  | 0.187687421 | 0.16525614 |
| 0.768832509 | 0.594826554 | 0.17400596 |
| 0.774431483 | 0.648236885 | 0.1261946  |
| 0.731824063 | 0.460331436 | 0.27149263 |
| 0.883194056 | 0.696390903 | 0.18680315 |
| 0.724750822 | 0.503198104 | 0.22155272 |
| 0.289539269 | 0.165690803 | 0.12384847 |
| 0.55792827  | 0.445347306 | 0.11258097 |
| 0.602091172 | 0.48937394  | 0.11271723 |
| 0.577379548 | 0.422410435 | 0.15496911 |
| 0.373895414 | 0.221034895 | 0.15286052 |
| 0.479166254 | 0.375227808 | 0.10393845 |
| 0.841157116 | 0.687459807 | 0.15369731 |
| 0.705041198 | 0.597324105 | 0.10771709 |
| 0.834186227 | 0.713942235 | 0.12024399 |
| 0.474234561 | 0.353870039 | 0.12036452 |
| 0.483899077 | 0.314985054 | 0.16891402 |
| 0.796843806 | 0.618768176 | 0.17807563 |
| 0.711014547 | 0.555612881 | 0.15540167 |
| 0.665037531 | 0.553836778 | 0.11120075 |
| 0.517321305 | 0.415023518 | 0.10229779 |
| 0.664038316 | 0.562182774 | 0.10185554 |
| 0.286082921 | 0.174188271 | 0.11189465 |
| 0.833260172 | 0.683829924 | 0.14943025 |
| 0.86681225  | 0.716248046 | 0.1505642  |
| 0.428718635 | 0.28501333  | 0.14370531 |
| 0.553111281 | 0.394497006 | 0.15861427 |
| 0.715222033 | 0.50461443  | 0.2106076  |
| 0.555999708 | 0.428973431 | 0.12702628 |
| 0.748570988 | 0.604469244 | 0.14410175 |
| 0.376089255 | 0.271428957 | 0.1046603  |
| 0.761778973 | 0.659882061 | 0.10189691 |
| 0.314050595 | 0.186388477 | 0.12766212 |
| 0.669214619 | 0.467265451 | 0.20194917 |
| 0.794033775 | 0.648820671 | 0.1452131  |
| 0.425310809 | 0.30797883  | 0.11733198 |
| 0.572215571 | 0.435290375 | 0.1369252  |
| 0.65522994  | 0.497367287 | 0.15786265 |
| 0.418689664 | 0.257183446 | 0.16150622 |
| 0.449015867 | 0.313734389 | 0.13528148 |



|             |             |            |
|-------------|-------------|------------|
| 0.497294577 | 0.328727173 | 0.1685674  |
| 0.533657654 | 0.430880784 | 0.10277687 |
| 0.874686111 | 0.684689715 | 0.1899964  |
| 0.250802902 | 0.132056378 | 0.11874652 |
| 0.425008202 | 0.321553495 | 0.10345471 |
| 0.563816393 | 0.421026839 | 0.14278955 |
| 0.55034947  | 0.4193186   | 0.13103087 |
| 0.570857278 | 0.44245336  | 0.12840392 |
| 0.59405931  | 0.465218145 | 0.12884117 |
| 0.711774112 | 0.559216131 | 0.15255798 |
| 0.736333745 | 0.569973123 | 0.16636062 |
| 0.621371819 | 0.388104864 | 0.23326696 |
| 0.719707696 | 0.604161035 | 0.11554666 |
| 0.4804421   | 0.352269507 | 0.12817259 |
| 0.625154305 | 0.486647512 | 0.13850679 |
| 0.674833027 | 0.558085361 | 0.11674767 |
| 0.391960471 | 0.288082391 | 0.10387808 |
| 0.874542182 | 0.713803249 | 0.16073893 |
| 0.623545372 | 0.514512928 | 0.10903244 |
| 0.653360638 | 0.546705207 | 0.10665543 |
| 0.84591405  | 0.742665772 | 0.10324828 |
| 0.322592033 | 0.220041235 | 0.1025508  |
| 0.475411263 | 0.27670412  | 0.19870714 |
| 0.351168769 | 0.232986303 | 0.11818247 |
| 0.632044975 | 0.518434609 | 0.11361037 |
| 0.441373044 | 0.293648284 | 0.14772476 |
| 0.519215563 | 0.413922403 | 0.10529316 |
| 0.813677769 | 0.597905358 | 0.21577241 |
| 0.802447917 | 0.677955379 | 0.12449254 |
| 0.625633988 | 0.439285233 | 0.18634875 |
| 0.816341719 | 0.685511855 | 0.13082987 |
| 0.439104055 | 0.315725612 | 0.12337844 |
| 0.791898859 | 0.669472315 | 0.12242654 |
| 0.824128822 | 0.624727689 | 0.19940113 |
| 0.504733522 | 0.36099623  | 0.14373729 |
| 0.599950312 | 0.446083775 | 0.15386654 |
| 0.539730708 | 0.429069619 | 0.11066109 |
| 0.444753225 | 0.343826088 | 0.10092714 |
| 0.567025832 | 0.41252885  | 0.15449698 |
| 0.765931139 | 0.655064338 | 0.1108668  |
| 0.642167939 | 0.538114853 | 0.10405309 |
| 0.63736985  | 0.530619381 | 0.10675047 |
| 0.845474134 | 0.718904845 | 0.12656929 |
| 0.829620461 | 0.714606716 | 0.11501375 |
| 0.444381057 | 0.329192281 | 0.11518878 |
| 0.465608965 | 0.282776842 | 0.18283212 |

|             |             |            |
|-------------|-------------|------------|
| 0.890179512 | 0.778735855 | 0.11144366 |
| 0.557130339 | 0.441597986 | 0.11553235 |
| 0.77245324  | 0.626998361 | 0.14545488 |
| 0.486255903 | 0.343284475 | 0.14297143 |
| 0.847853959 | 0.737115344 | 0.11073862 |
| 0.849244597 | 0.717501867 | 0.13174273 |
| 0.442637321 | 0.306985706 | 0.13565162 |
| 0.458725866 | 0.33366064  | 0.12506523 |
| 0.685206673 | 0.563833417 | 0.12137326 |
| 0.612223963 | 0.488617242 | 0.12360672 |
| 0.42008959  | 0.299861574 | 0.12022802 |
| 0.699824797 | 0.599437229 | 0.10038757 |
| 0.51987836  | 0.330470569 | 0.18940779 |
| 0.758556604 | 0.642692803 | 0.1158638  |
| 0.564489124 | 0.366290038 | 0.19819909 |
| 0.763768515 | 0.629707492 | 0.13406102 |
| 0.752250366 | 0.651843663 | 0.1004067  |
| 0.748811492 | 0.515654443 | 0.23315705 |
| 0.675154615 | 0.468530973 | 0.20662364 |
| 0.566684935 | 0.420961621 | 0.14572331 |
| 0.645356585 | 0.449041272 | 0.19631531 |
| 0.350363545 | 0.229070711 | 0.12129283 |
| 0.485748515 | 0.369284789 | 0.11646373 |
| 0.876674606 | 0.719034534 | 0.15764007 |
| 0.574396488 | 0.41090873  | 0.16348776 |
| 0.505429842 | 0.393158749 | 0.11227109 |
| 0.609512754 | 0.473718689 | 0.13579407 |
| 0.838623446 | 0.71156533  | 0.12705812 |
| 0.86758192  | 0.717599788 | 0.14998213 |
| 0.887488863 | 0.777438832 | 0.11005003 |
| 0.88678085  | 0.763920877 | 0.12285997 |
| 0.40169696  | 0.297107527 | 0.10458943 |
| 0.760289234 | 0.642964986 | 0.11732425 |
| 0.354381589 | 0.22722159  | 0.12716    |
| 0.817541679 | 0.593205195 | 0.22433648 |
| 0.703691819 | 0.596511224 | 0.1071806  |
| 0.675574316 | 0.538805185 | 0.13676913 |
| 0.47106073  | 0.32856083  | 0.1424999  |
| 0.879937289 | 0.756834497 | 0.12310279 |
| 0.705951951 | 0.573290076 | 0.13266188 |
| 0.633221666 | 0.478147054 | 0.15507461 |
| 0.548501761 | 0.364034784 | 0.18446698 |
| 0.410072445 | 0.299311342 | 0.1107611  |
| 0.736734769 | 0.589734297 | 0.14700047 |
| 0.458194799 | 0.344694218 | 0.11350058 |
| 0.45558462  | 0.305482639 | 0.15010198 |

|             |             |            |
|-------------|-------------|------------|
| 0.525689083 | 0.33751124  | 0.18817784 |
| 0.519416852 | 0.318868319 | 0.20054853 |
| 0.545863333 | 0.430318906 | 0.11554443 |
| 0.526702349 | 0.37139177  | 0.15531058 |
| 0.713094474 | 0.598228507 | 0.11486597 |
| 0.707858748 | 0.566140583 | 0.14171817 |
| 0.813357496 | 0.703519186 | 0.10983831 |
| 0.605207208 | 0.456156598 | 0.14905061 |
| 0.723310605 | 0.610286532 | 0.11302407 |
| 0.543422769 | 0.333987509 | 0.20943526 |
| 0.648250547 | 0.473298619 | 0.17495193 |
| 0.528679295 | 0.416986298 | 0.111693   |
| 0.348850361 | 0.235900496 | 0.11294987 |
| 0.588862597 | 0.480610347 | 0.10825225 |
| 0.637274151 | 0.503915627 | 0.13335852 |
| 0.682364159 | 0.474889758 | 0.2074744  |
| 0.574513866 | 0.442331416 | 0.13218245 |
| 0.804646243 | 0.70288269  | 0.10176355 |
| 0.31502595  | 0.208865961 | 0.10615999 |
| 0.607213357 | 0.428372724 | 0.17884063 |
| 0.391341294 | 0.256257197 | 0.1350841  |
| 0.821858415 | 0.676494216 | 0.1453642  |
| 0.831332368 | 0.65801208  | 0.17332029 |
| 0.541388398 | 0.373877957 | 0.16751044 |
| 0.754588324 | 0.63457011  | 0.12001821 |
| 0.796138167 | 0.626020708 | 0.17011746 |
| 0.500305363 | 0.336621587 | 0.16368378 |
| 0.306842926 | 0.171761987 | 0.13508094 |
| 0.865162962 | 0.739230237 | 0.12593273 |
| 0.789355255 | 0.628514017 | 0.16084124 |
| 0.342531626 | 0.221793495 | 0.12073813 |
| 0.498687863 | 0.366556813 | 0.13213105 |
| 0.644969752 | 0.536460182 | 0.10850957 |
| 0.847283052 | 0.711385494 | 0.13589756 |
| 0.404107234 | 0.250281059 | 0.15382618 |
| 0.724484095 | 0.548142242 | 0.17634185 |
| 0.724486044 | 0.618100581 | 0.10638546 |
| 0.855493795 | 0.713485281 | 0.14200851 |
| 0.722347858 | 0.611063469 | 0.11128439 |
| 0.88058513  | 0.723805105 | 0.15678002 |
| 0.539013962 | 0.429098005 | 0.10991596 |
| 0.508284397 | 0.351828635 | 0.15645576 |
| 0.604934471 | 0.503664948 | 0.10126952 |
| 0.80298173  | 0.69012853  | 0.1128532  |
| 0.405077895 | 0.282013585 | 0.12306431 |
| 0.784288379 | 0.659889777 | 0.1243986  |

0.410638387 0.283210454 0.12742793  
0.863562188 0.719821301 0.14374089  
0.305861776 0.157357438 0.14850434  
0.707283554 0.570208821 0.13707473  
0.433357901 0.29372258 0.13963532  
0.541744275 0.439875939 0.10186834  
0.513462128 0.38332463 0.1301375  
0.358137624 0.178606426 0.1795312  
0.538862944 0.437298628 0.10156432  
0.615074464 0.458634867 0.1564396  
0.611048894 0.422559036 0.18848986  
0.519853975 0.339694017 0.18015996  
0.298622714 0.144040588 0.15458213  
0.871990196 0.748473331 0.12351687  
0.720384291 0.534789678 0.18559461  
0.71687613 0.610848466 0.10602766  
0.387815648 0.282589919 0.10522573  
0.632659671 0.406378335 0.22628134  
0.643600345 0.534017028 0.10958332  
0.515043771 0.374897528 0.14014624  
0.42403517 0.310545398 0.11348977  
0.59304027 0.476266197 0.11677407  
0.48453761 0.343005334 0.14153228  
0.586178527 0.425797212 0.16038132  
0.499231097 0.322484001 0.1767471  
0.366314798 0.253927312 0.11238749  
0.76700276 0.665647144 0.10135562  
0.745608393 0.62932896 0.11627943  
0.802441538 0.686638939 0.1158026  
0.889906797 0.76334833 0.12655847  
0.392066698 0.287383465 0.10468323  
0.613620304 0.470824736 0.14279557  
0.47410748 0.373180441 0.10092704  
0.827285102 0.686938268 0.14034684  
0.470000705 0.26878101 0.2012197  
0.687492842 0.5604861 0.12700674  
0.656843366 0.527240007 0.12960336  
0.415737188 0.259648305 0.15608888  
0.451105087 0.31979832 0.13130677  
0.453779839 0.320943378 0.13283646  
0.384036805 0.201392748 0.18264406  
0.763188804 0.527837565 0.23535124  
0.22778749 0.126131737 0.10165575  
0.332398816 0.206035442 0.12636338  
0.704062728 0.535319822 0.16874291  
0.7199304 0.597157 0.1227734

|             |             |            |
|-------------|-------------|------------|
| 0.815092077 | 0.690296287 | 0.12479579 |
| 0.798551892 | 0.610509462 | 0.18804243 |
| 0.828490095 | 0.673110508 | 0.15537959 |
| 0.603784105 | 0.434322748 | 0.16946136 |
| 0.523162386 | 0.418262384 | 0.1049     |
| 0.439027029 | 0.331057522 | 0.10796951 |
| 0.872112889 | 0.757794168 | 0.11431872 |
| 0.425435592 | 0.288899478 | 0.13653611 |
| 0.295070312 | 0.185375696 | 0.10969462 |
| 0.352343973 | 0.228703073 | 0.1236409  |
| 0.512701171 | 0.406732237 | 0.10596893 |
| 0.593146965 | 0.415175488 | 0.17797148 |
| 0.355087002 | 0.213032317 | 0.14205469 |
| 0.773992407 | 0.551779395 | 0.22221301 |
| 0.510984103 | 0.382845663 | 0.12813844 |
| 0.562146778 | 0.401947044 | 0.16019973 |
| 0.717805886 | 0.608655058 | 0.10915083 |
| 0.793539723 | 0.68424817  | 0.10929155 |
| 0.765007696 | 0.620155682 | 0.14485201 |
| 0.485704605 | 0.370161269 | 0.11554334 |
| 0.753470372 | 0.649362016 | 0.10410836 |
| 0.868419366 | 0.69755981  | 0.17085956 |
| 0.840611681 | 0.650713262 | 0.18989842 |
| 0.42184561  | 0.294019497 | 0.12782611 |
| 0.594284102 | 0.451328369 | 0.14295573 |
| 0.561932012 | 0.412377541 | 0.14955447 |
| 0.63442127  | 0.461013942 | 0.17340733 |
| 0.639831729 | 0.463322443 | 0.17650929 |
| 0.335804876 | 0.210373852 | 0.12543102 |
| 0.394610984 | 0.289591918 | 0.10501907 |
| 0.266293598 | 0.149827119 | 0.11646648 |
| 0.840754367 | 0.716545107 | 0.12420926 |
| 0.357171883 | 0.197839649 | 0.15933223 |
| 0.873484564 | 0.758453178 | 0.11503139 |
| 0.319568009 | 0.173339267 | 0.14622874 |
| 0.359566422 | 0.192086975 | 0.16747945 |
| 0.854330592 | 0.737397327 | 0.11693327 |
| 0.798398959 | 0.632859167 | 0.16553979 |
| 0.658049648 | 0.537656213 | 0.12039344 |
| 0.445589078 | 0.321352234 | 0.12423685 |
| 0.669676318 | 0.489794578 | 0.17988174 |
| 0.406479552 | 0.264782342 | 0.14169721 |
| 0.851902056 | 0.718790003 | 0.13311205 |
| 0.588414866 | 0.376225604 | 0.21218926 |
| 0.905964939 | 0.801816318 | 0.10414862 |
| 0.64981524  | 0.44119699  | 0.20861825 |

|             |             |            |
|-------------|-------------|------------|
| 0.448211063 | 0.338844604 | 0.10936646 |
| 0.851636437 | 0.687571041 | 0.1640654  |
| 0.390527904 | 0.279216384 | 0.11131152 |
| 0.5054052   | 0.389878484 | 0.11552672 |
| 0.59492551  | 0.455790725 | 0.13913479 |
| 0.648268066 | 0.503397231 | 0.14487084 |
| 0.470435216 | 0.364879687 | 0.10555553 |
| 0.703035917 | 0.595197139 | 0.10783878 |
| 0.849255171 | 0.748870514 | 0.10038466 |
| 0.655265733 | 0.530410308 | 0.12485543 |
| 0.476981184 | 0.357334748 | 0.11964644 |
| 0.585362557 | 0.460291779 | 0.12507078 |
| 0.627561199 | 0.513124407 | 0.11443679 |
| 0.648003883 | 0.537272506 | 0.11073138 |
| 0.865129818 | 0.737983844 | 0.12714598 |
| 0.893192473 | 0.746359944 | 0.14683253 |
| 0.825312126 | 0.668402046 | 0.15691008 |
| 0.779188387 | 0.563870205 | 0.21531818 |
| 0.832057793 | 0.703923158 | 0.12813464 |
| 0.543031004 | 0.427011601 | 0.1160194  |
| 0.736052145 | 0.58435918  | 0.15169297 |
| 0.38218939  | 0.234246615 | 0.14794278 |
| 0.879218933 | 0.764635895 | 0.11458304 |
| 0.748275332 | 0.570103304 | 0.17817203 |
| 0.833376478 | 0.710744938 | 0.12263154 |
| 0.279055287 | 0.161827812 | 0.11722748 |
| 0.735971687 | 0.565901065 | 0.17007062 |
| 0.699138277 | 0.508810243 | 0.19032803 |
| 0.764800247 | 0.647467838 | 0.11733241 |
| 0.865801303 | 0.744326087 | 0.12147522 |
| 0.748834983 | 0.631643076 | 0.11719191 |
| 0.741539213 | 0.505506284 | 0.23603293 |
| 0.384748706 | 0.255402916 | 0.12934579 |
| 0.426108428 | 0.241570856 | 0.18453757 |
| 0.497770215 | 0.348818621 | 0.14895159 |
| 0.493923465 | 0.369481774 | 0.12444169 |
| 0.345942217 | 0.239375183 | 0.10656704 |
| 0.402516519 | 0.25891665  | 0.14359987 |
| 0.553660749 | 0.448132881 | 0.10552787 |
| 0.289038061 | 0.179678093 | 0.10935997 |
| 0.526085787 | 0.340916726 | 0.18516906 |
| 0.480684275 | 0.354925787 | 0.12575849 |
| 0.343151126 | 0.206027331 | 0.1371238  |
| 0.496259593 | 0.309240744 | 0.18701885 |
| 0.427712229 | 0.300936571 | 0.12677566 |
| 0.368606194 | 0.267088309 | 0.10151789 |

|             |             |            |
|-------------|-------------|------------|
| 0.253453629 | 0.126112303 | 0.12734133 |
| 0.755043919 | 0.612572052 | 0.14247187 |
| 0.860984394 | 0.70089874  | 0.16008565 |
| 0.750650198 | 0.596562384 | 0.15408781 |
| 0.533907783 | 0.407246625 | 0.12666116 |
| 0.719537958 | 0.549351344 | 0.17018661 |
| 0.420605931 | 0.302395879 | 0.11821005 |
| 0.619221859 | 0.450944698 | 0.16827716 |
| 0.630567628 | 0.490698253 | 0.13986938 |
| 0.79624159  | 0.625232849 | 0.17100874 |
| 0.694045889 | 0.507745972 | 0.18629992 |
| 0.356390359 | 0.246955188 | 0.10943517 |
| 0.727096767 | 0.546745706 | 0.18035106 |
| 0.563153139 | 0.349650096 | 0.21350304 |
| 0.584301936 | 0.468759443 | 0.11554249 |
| 0.674265045 | 0.535198588 | 0.13906646 |
| 0.356949288 | 0.241332155 | 0.11561713 |
| 0.527953958 | 0.392254983 | 0.13569898 |
| 0.415041846 | 0.281285533 | 0.13375631 |
| 0.702554426 | 0.578488462 | 0.12406596 |
| 0.287657429 | 0.168531442 | 0.11912599 |
| 0.320837979 | 0.210342929 | 0.11049505 |
| 0.460994313 | 0.358315334 | 0.10267898 |
| 0.401844837 | 0.282270029 | 0.11957481 |
| 0.609120727 | 0.42609238  | 0.18302835 |
| 0.723820248 | 0.51977913  | 0.20404112 |
| 0.304117949 | 0.188864556 | 0.11525339 |
| 0.798994288 | 0.641936135 | 0.15705815 |
| 0.486176485 | 0.273186647 | 0.21298984 |
| 0.80280556  | 0.65870384  | 0.14410172 |
| 0.604922672 | 0.438983122 | 0.16593955 |
| 0.621362755 | 0.504024269 | 0.11733849 |
| 0.470431584 | 0.330108745 | 0.14032284 |
| 0.686572367 | 0.542137916 | 0.14443445 |
| 0.5749623   | 0.40420693  | 0.17075537 |
| 0.561169198 | 0.365656445 | 0.19551275 |
| 0.421054849 | 0.225068002 | 0.19598685 |
| 0.635877926 | 0.516541667 | 0.11933626 |
| 0.77332906  | 0.638853914 | 0.13447515 |
| 0.462009481 | 0.299327356 | 0.16268213 |
| 0.600884648 | 0.422320205 | 0.17856444 |
| 0.778305289 | 0.664608894 | 0.1136964  |
| 0.511980751 | 0.336321117 | 0.17565963 |
| 0.4920953   | 0.389807037 | 0.10228826 |
| 0.734549945 | 0.59178854  | 0.14276141 |
| 0.429672196 | 0.208915131 | 0.22075706 |

|             |             |            |
|-------------|-------------|------------|
| 0.517822078 | 0.402457857 | 0.11536422 |
| 0.844042958 | 0.706096118 | 0.13794684 |
| 0.279915653 | 0.156502053 | 0.1234136  |
| 0.432289284 | 0.275017494 | 0.15727179 |
| 0.669123567 | 0.514317821 | 0.15480575 |
| 0.658184451 | 0.546275488 | 0.11190896 |
| 0.763166854 | 0.630219421 | 0.13294743 |
| 0.583846708 | 0.48139651  | 0.1024502  |
| 0.648925514 | 0.538238702 | 0.11068681 |
| 0.25717231  | 0.138654838 | 0.11851747 |
| 0.603221582 | 0.482269009 | 0.12095257 |
| 0.609210877 | 0.485341012 | 0.12386987 |
| 0.392696705 | 0.23889891  | 0.1537978  |
| 0.559528731 | 0.397413357 | 0.16211537 |
| 0.74031747  | 0.570934293 | 0.16938318 |
| 0.50887141  | 0.393699856 | 0.11517155 |
| 0.43331747  | 0.290243738 | 0.14307373 |
| 0.285786647 | 0.170473608 | 0.11531304 |
| 0.411906562 | 0.30051918  | 0.11138738 |
| 0.746606623 | 0.598293719 | 0.1483129  |
| 0.647424247 | 0.518943603 | 0.12848064 |
| 0.369585089 | 0.254540822 | 0.11504427 |
| 0.653794187 | 0.481031415 | 0.17276277 |
| 0.799809159 | 0.651809071 | 0.14800009 |
| 0.885022064 | 0.775126147 | 0.10989592 |
| 0.435575674 | 0.329651661 | 0.10592401 |
| 0.319167751 | 0.216241931 | 0.10292582 |
| 0.738709398 | 0.589619357 | 0.14909004 |
| 0.538607854 | 0.369801174 | 0.16880668 |
| 0.456254424 | 0.284331814 | 0.17192261 |
| 0.643608357 | 0.462220685 | 0.18138767 |
| 0.680610587 | 0.484841118 | 0.19576947 |
| 0.812437132 | 0.676483706 | 0.13595343 |
| 0.564090414 | 0.410103052 | 0.15398736 |
| 0.656328043 | 0.547202148 | 0.1091259  |
| 0.775438954 | 0.637373442 | 0.13806551 |
| 0.809729811 | 0.672554139 | 0.13717567 |
| 0.307404661 | 0.178191834 | 0.12921283 |
| 0.346325048 | 0.230006336 | 0.11631871 |
| 0.487209588 | 0.370012404 | 0.11719718 |
| 0.86067134  | 0.703889233 | 0.15678211 |
| 0.563893135 | 0.439111367 | 0.12478177 |
| 0.700431908 | 0.579518238 | 0.12091367 |
| 0.565609328 | 0.463567906 | 0.10204142 |
| 0.547588503 | 0.362009585 | 0.18557892 |
| 0.739752788 | 0.626386894 | 0.11336589 |



|             |             |            |
|-------------|-------------|------------|
| 0.389503233 | 0.262250703 | 0.12725253 |
| 0.539959246 | 0.429005891 | 0.11095336 |
| 0.818323308 | 0.658391429 | 0.15993188 |
| 0.688649921 | 0.475746825 | 0.2129031  |
| 0.842012708 | 0.735851396 | 0.10616131 |
| 0.709631655 | 0.60756026  | 0.1020714  |
| 0.658429097 | 0.55766945  | 0.10075965 |
| 0.590503674 | 0.345615237 | 0.24488844 |
| 0.852261598 | 0.73311185  | 0.11914975 |
| 0.646338904 | 0.525697143 | 0.12064176 |
| 0.583014592 | 0.407219363 | 0.17579523 |
| 0.503301891 | 0.312191272 | 0.19111062 |
| 0.844894031 | 0.720956571 | 0.12393746 |
| 0.498077636 | 0.37692927  | 0.12114837 |
| 0.84167936  | 0.737759137 | 0.10392022 |
| 0.797334644 | 0.641000224 | 0.15633442 |
| 0.474116642 | 0.367408794 | 0.10670785 |
| 0.657726218 | 0.531941988 | 0.12578423 |
| 0.901533843 | 0.798176248 | 0.1033576  |
| 0.595624986 | 0.439321831 | 0.15630315 |
| 0.462453457 | 0.337226008 | 0.12522745 |
| 0.589228983 | 0.479014008 | 0.11021498 |
| 0.697991666 | 0.596436347 | 0.10155532 |
| 0.783609657 | 0.672571205 | 0.11103845 |
| 0.733458422 | 0.612987923 | 0.1204705  |
| 0.4394817   | 0.261704585 | 0.17777712 |
| 0.788745587 | 0.585875544 | 0.20287004 |
| 0.354551029 | 0.253650439 | 0.10090059 |
| 0.607082688 | 0.50497689  | 0.1021058  |
| 0.418394524 | 0.313262522 | 0.105132   |
| 0.573896313 | 0.463777547 | 0.11011877 |
| 0.523418493 | 0.348955348 | 0.17446315 |
| 0.615022902 | 0.511682912 | 0.10333999 |
| 0.884590987 | 0.763976698 | 0.12061429 |
| 0.399902601 | 0.27863653  | 0.12126607 |
| 0.849759782 | 0.732797271 | 0.11696251 |
| 0.713381038 | 0.546578528 | 0.16680251 |
| 0.772349831 | 0.633857014 | 0.13849282 |
| 0.292872132 | 0.172071436 | 0.1208007  |
| 0.386272862 | 0.280203112 | 0.10606975 |
| 0.649445743 | 0.511205105 | 0.13824064 |
| 0.717856242 | 0.614228796 | 0.10362745 |
| 0.815931608 | 0.704828172 | 0.11110344 |
| 0.859605512 | 0.704055374 | 0.15555014 |
| 0.745931691 | 0.570914146 | 0.17501755 |
| 0.801036253 | 0.68834586  | 0.11269039 |

|             |             |            |
|-------------|-------------|------------|
| 0.505083912 | 0.3503161   | 0.15476781 |
| 0.441847384 | 0.301103332 | 0.14074405 |
| 0.740176603 | 0.610805935 | 0.12937067 |
| 0.32613278  | 0.207200778 | 0.118932   |
| 0.824102655 | 0.705542818 | 0.11855984 |
| 0.402786139 | 0.294490102 | 0.10829604 |
| 0.540097907 | 0.424107371 | 0.11599054 |
| 0.458777393 | 0.339530032 | 0.11924736 |
| 0.679426214 | 0.49612893  | 0.18329728 |
| 0.46288306  | 0.328611382 | 0.13427168 |
| 0.419519744 | 0.306658916 | 0.11286083 |
| 0.478720182 | 0.296642143 | 0.18207804 |
| 0.338838242 | 0.214469574 | 0.12436867 |
| 0.699406754 | 0.56119735  | 0.13820941 |
| 0.724337982 | 0.614492786 | 0.1098452  |
| 0.827848902 | 0.697935879 | 0.12991302 |
| 0.521459271 | 0.389776355 | 0.13168292 |
| 0.632192215 | 0.440191624 | 0.19200059 |
| 0.881656387 | 0.683588818 | 0.19806757 |
| 0.706121262 | 0.554816323 | 0.15130494 |
| 0.476922876 | 0.363565124 | 0.11335775 |
| 0.870445458 | 0.759126146 | 0.11131931 |
| 0.487192794 | 0.38192938  | 0.10526341 |
| 0.482737877 | 0.325719621 | 0.15701826 |
| 0.637167254 | 0.48793222  | 0.14923503 |
| 0.689216106 | 0.523490563 | 0.16572554 |
| 0.503582617 | 0.296807928 | 0.20677469 |
| 0.720007362 | 0.60634065  | 0.11366671 |
| 0.388228843 | 0.24300017  | 0.14522867 |
| 0.70168998  | 0.580668162 | 0.12102182 |
| 0.517666205 | 0.368435439 | 0.14923077 |
| 0.913325175 | 0.802277121 | 0.11104805 |
| 0.821631736 | 0.673939731 | 0.14769201 |
| 0.731529064 | 0.597292328 | 0.13423674 |
| 0.523497717 | 0.353267492 | 0.17023023 |
| 0.675555586 | 0.4701213   | 0.20543429 |
| 0.290592411 | 0.186514642 | 0.10407777 |
| 0.477462637 | 0.30421454  | 0.1732481  |
| 0.392167148 | 0.269286384 | 0.12288076 |
| 0.711015327 | 0.532393056 | 0.17862227 |
| 0.801165007 | 0.659532377 | 0.14163263 |
| 0.65067968  | 0.479577014 | 0.17110267 |
| 0.722806251 | 0.614441529 | 0.10836472 |
| 0.836311303 | 0.732038728 | 0.10427258 |
| 0.639797827 | 0.525926739 | 0.11387109 |
| 0.670955157 | 0.483546694 | 0.18740846 |

|             |             |            |
|-------------|-------------|------------|
| 0.585350325 | 0.453597346 | 0.13175298 |
| 0.381301719 | 0.278336343 | 0.10296538 |
| 0.792174436 | 0.630113204 | 0.16206123 |
| 0.446158627 | 0.280765478 | 0.16539315 |
| 0.770732618 | 0.586709632 | 0.18402299 |
| 0.84164233  | 0.654064261 | 0.18757807 |
| 0.642639018 | 0.517335487 | 0.12530353 |
| 0.365190027 | 0.244750829 | 0.1204392  |
| 0.697809708 | 0.580232392 | 0.11757732 |
| 0.439571309 | 0.326750189 | 0.11282112 |
| 0.715292123 | 0.602665264 | 0.11262686 |
| 0.778065645 | 0.618992347 | 0.1590733  |
| 0.398489419 | 0.294625211 | 0.10386421 |
| 0.672766347 | 0.52022574  | 0.15254061 |
| 0.699098975 | 0.587674655 | 0.11142432 |
| 0.772613284 | 0.647498917 | 0.12511437 |
| 0.570597742 | 0.436684384 | 0.13391336 |
| 0.786442828 | 0.644160816 | 0.14228201 |
| 0.724807859 | 0.615626962 | 0.1091809  |
| 0.717898754 | 0.557863877 | 0.16003488 |
| 0.884133736 | 0.700048093 | 0.18408564 |
| 0.896628703 | 0.767793018 | 0.12883569 |
| 0.630338808 | 0.36681007  | 0.26352874 |
| 0.69231546  | 0.556003803 | 0.13631166 |
| 0.805662425 | 0.704064474 | 0.10159795 |
| 0.574909028 | 0.406236995 | 0.16867203 |
| 0.856882347 | 0.69743242  | 0.15944993 |
| 0.641105813 | 0.402848614 | 0.2382572  |
| 0.899714128 | 0.784067522 | 0.11564661 |
| 0.678182375 | 0.577924997 | 0.10025738 |
| 0.720157946 | 0.551342562 | 0.16881538 |
| 0.537113045 | 0.352425598 | 0.18468745 |
| 0.546184166 | 0.415223859 | 0.13096031 |
| 0.724867145 | 0.567543057 | 0.15732409 |
| 0.785763501 | 0.652971988 | 0.13279151 |
| 0.787835712 | 0.660957648 | 0.12687806 |
| 0.871081329 | 0.730826448 | 0.14025488 |
| 0.586655259 | 0.460433041 | 0.12622222 |
| 0.709049016 | 0.567833602 | 0.14121541 |
| 0.685004418 | 0.527925644 | 0.15707877 |
| 0.787441906 | 0.617571567 | 0.16987034 |
| 0.488726537 | 0.345257679 | 0.14346886 |
| 0.585442559 | 0.433285059 | 0.1521575  |
| 0.346043593 | 0.214336963 | 0.13170663 |
| 0.640500329 | 0.501660382 | 0.13883995 |
| 0.814331864 | 0.6190878   | 0.19524406 |

|             |             |            |
|-------------|-------------|------------|
| 0.528556018 | 0.379912606 | 0.14864341 |
| 0.623788967 | 0.49524709  | 0.12854188 |
| 0.309081907 | 0.185639887 | 0.12344202 |
| 0.733967639 | 0.599579894 | 0.13438775 |
| 0.757083843 | 0.596499166 | 0.16058468 |
| 0.736128322 | 0.625635012 | 0.11049331 |
| 0.488162247 | 0.384422855 | 0.10373939 |
| 0.567468522 | 0.383405447 | 0.18406308 |
| 0.681718832 | 0.540425228 | 0.1412936  |
| 0.604085092 | 0.411410415 | 0.19267468 |
| 0.759890835 | 0.65014723  | 0.10974361 |
| 0.630226754 | 0.528871806 | 0.10135495 |
| 0.568842147 | 0.413627359 | 0.15521479 |
| 0.44876093  | 0.334241226 | 0.1145197  |
| 0.5851015   | 0.466272667 | 0.11882883 |
| 0.777706599 | 0.674784768 | 0.10292183 |
| 0.560727546 | 0.426702032 | 0.13402551 |
| 0.32145829  | 0.198078992 | 0.1233793  |
| 0.78742415  | 0.602057189 | 0.18536696 |
| 0.712604504 | 0.454762211 | 0.25784229 |
| 0.348166521 | 0.198095751 | 0.15007077 |
| 0.718174456 | 0.588729296 | 0.12944516 |
| 0.701006078 | 0.593352438 | 0.10765364 |
| 0.625320318 | 0.507826422 | 0.1174939  |
| 0.865194806 | 0.711571551 | 0.15362326 |
| 0.473738255 | 0.368462434 | 0.10527582 |
| 0.745593699 | 0.586726141 | 0.15886756 |
| 0.47086909  | 0.359634128 | 0.11123496 |
| 0.489846774 | 0.355196054 | 0.13465072 |
| 0.786942154 | 0.682521342 | 0.10442081 |
| 0.403139562 | 0.25623575  | 0.14690381 |
| 0.621697485 | 0.510612401 | 0.11108508 |
| 0.406119688 | 0.278619141 | 0.12750055 |
| 0.31813759  | 0.176506358 | 0.14163123 |
| 0.325204199 | 0.194007966 | 0.13119623 |
| 0.468581605 | 0.286882636 | 0.18169897 |
| 0.555117184 | 0.42950886  | 0.12560832 |
| 0.724278699 | 0.499339941 | 0.22493876 |
| 0.518393871 | 0.33481594  | 0.18357793 |
| 0.73003481  | 0.625715368 | 0.10431944 |
| 0.254892494 | 0.149159584 | 0.10573291 |
| 0.886267301 | 0.732184648 | 0.15408265 |
| 0.801455015 | 0.606218984 | 0.19523603 |
| 0.761531103 | 0.553959765 | 0.20757134 |
| 0.820327289 | 0.664810207 | 0.15551708 |
| 0.497675154 | 0.375391025 | 0.12228413 |

|             |             |            |
|-------------|-------------|------------|
| 0.578451862 | 0.471734392 | 0.10671747 |
| 0.415272566 | 0.296136806 | 0.11913576 |
| 0.889964893 | 0.671118962 | 0.21884593 |
| 0.435069497 | 0.296195195 | 0.1388743  |
| 0.771242248 | 0.650511386 | 0.12073086 |
| 0.694848458 | 0.586465139 | 0.10838332 |
| 0.649391762 | 0.52176755  | 0.12762421 |
| 0.671332007 | 0.522350124 | 0.14898188 |
| 0.385136072 | 0.269038358 | 0.11609771 |
| 0.776812113 | 0.658549667 | 0.11826245 |
| 0.764060831 | 0.637843271 | 0.12621756 |
| 0.517820099 | 0.398084038 | 0.11973606 |
| 0.486846901 | 0.221012342 | 0.26583456 |
| 0.848755148 | 0.703693503 | 0.14506164 |
| 0.825207022 | 0.711392681 | 0.11381434 |
| 0.786889    | 0.663157745 | 0.12373126 |
| 0.464947186 | 0.293211257 | 0.17173593 |
| 0.534812884 | 0.399510763 | 0.13530212 |
| 0.385275018 | 0.273850612 | 0.11142441 |
| 0.53441396  | 0.382680417 | 0.15173354 |
| 0.470788789 | 0.31101172  | 0.15977707 |
| 0.66998825  | 0.56770377  | 0.10228448 |
| 0.766237182 | 0.64156291  | 0.12467427 |
| 0.376964842 | 0.273870265 | 0.10309458 |
| 0.317082023 | 0.212821621 | 0.1042604  |
| 0.688906828 | 0.48746056  | 0.20144627 |
| 0.486700768 | 0.367572312 | 0.11912846 |
| 0.53610499  | 0.404199006 | 0.13190598 |
| 0.490250515 | 0.379715259 | 0.11053526 |
| 0.363514876 | 0.213836557 | 0.14967832 |
| 0.740567004 | 0.609115649 | 0.13145135 |
| 0.73595324  | 0.631727186 | 0.10422605 |
| 0.821338594 | 0.715284439 | 0.10605416 |
| 0.432605126 | 0.303242676 | 0.12936245 |
| 0.686686465 | 0.552963873 | 0.13372259 |
| 0.863824436 | 0.70115612  | 0.16266832 |
| 0.78684987  | 0.508805312 | 0.27804456 |
| 0.523306937 | 0.420056688 | 0.10325025 |
| 0.543023433 | 0.40717976  | 0.13584367 |
| 0.650787384 | 0.453031391 | 0.19775599 |
| 0.78187118  | 0.662077858 | 0.11979332 |
| 0.757641495 | 0.625620942 | 0.13202055 |
| 0.622271731 | 0.412216342 | 0.21005539 |
| 0.634362622 | 0.481603693 | 0.15275893 |
| 0.350275563 | 0.247872105 | 0.10240346 |
| 0.762157533 | 0.655988197 | 0.10616934 |

|             |             |            |
|-------------|-------------|------------|
| 0.242718511 | 0.126294285 | 0.11642423 |
| 0.61669165  | 0.493012948 | 0.1236787  |
| 0.663857544 | 0.529893098 | 0.13396445 |
| 0.650543156 | 0.513277853 | 0.1372653  |
| 0.682320041 | 0.536032375 | 0.14628767 |
| 0.887092383 | 0.717307042 | 0.16978534 |
| 0.838848573 | 0.655064511 | 0.18378406 |
| 0.657599501 | 0.470389382 | 0.18721012 |
| 0.377638493 | 0.247280797 | 0.1303577  |
| 0.416829283 | 0.25705855  | 0.15977073 |
| 0.523166443 | 0.241715208 | 0.28145124 |
| 0.774479185 | 0.670625164 | 0.10385402 |
| 0.514532324 | 0.401615785 | 0.11291654 |
| 0.634605758 | 0.498011466 | 0.13659429 |
| 0.583785717 | 0.463809039 | 0.11997668 |
| 0.783731233 | 0.636398742 | 0.14733249 |
| 0.891459938 | 0.784187144 | 0.10727279 |
| 0.674475155 | 0.491801768 | 0.18267339 |
| 0.846310673 | 0.723425778 | 0.1228849  |
| 0.542450244 | 0.429126605 | 0.11332364 |
| 0.370993623 | 0.262981728 | 0.10801189 |
| 0.75599629  | 0.638174888 | 0.1178214  |
| 0.358480647 | 0.242926086 | 0.11555456 |
| 0.811733252 | 0.666528619 | 0.14520463 |
| 0.82526234  | 0.678409807 | 0.14685253 |
| 0.57034481  | 0.414089547 | 0.15625526 |
| 0.475828426 | 0.349951197 | 0.12587723 |
| 0.449140469 | 0.326615583 | 0.12252489 |
| 0.293226335 | 0.176899165 | 0.11632717 |
| 0.812565165 | 0.575534489 | 0.23703068 |
| 0.695464176 | 0.531158294 | 0.16430588 |
| 0.759155192 | 0.650706661 | 0.10844853 |
| 0.604785559 | 0.455561017 | 0.14922454 |
| 0.726758514 | 0.605171687 | 0.12158683 |
| 0.684596171 | 0.577726975 | 0.1068692  |
| 0.755827627 | 0.648568043 | 0.10725958 |
| 0.76466226  | 0.658359725 | 0.10630254 |
| 0.391285035 | 0.270063347 | 0.12122169 |
| 0.706966413 | 0.535601081 | 0.17136533 |
| 0.930517548 | 0.81669263  | 0.11382492 |
| 0.348806509 | 0.227951302 | 0.12085521 |
| 0.793926114 | 0.654675109 | 0.139251   |
| 0.494940005 | 0.297765983 | 0.19717402 |
| 0.858156916 | 0.699368666 | 0.15878825 |
| 0.460310003 | 0.356562194 | 0.10374781 |
| 0.817417385 | 0.706174966 | 0.11124242 |

|             |             |            |
|-------------|-------------|------------|
| 0.671896287 | 0.477625894 | 0.19427039 |
| 0.579700091 | 0.383933463 | 0.19576663 |
| 0.55562777  | 0.448306582 | 0.10732119 |
| 0.794277664 | 0.686574103 | 0.10770356 |
| 0.470378777 | 0.360609372 | 0.10976941 |
| 0.415801703 | 0.296658922 | 0.11914278 |
| 0.562110753 | 0.456980132 | 0.10513062 |
| 0.784969415 | 0.655337768 | 0.12963165 |
| 0.748470054 | 0.598468989 | 0.15000107 |
| 0.776425811 | 0.624226153 | 0.15219966 |
| 0.892008213 | 0.769510031 | 0.12249818 |
| 0.747069186 | 0.608811326 | 0.13825786 |
| 0.410252274 | 0.296630789 | 0.11362149 |
| 0.669695449 | 0.55518356  | 0.11451189 |
| 0.86343935  | 0.711159745 | 0.15227961 |
| 0.386104871 | 0.229927587 | 0.15617728 |
| 0.816456676 | 0.708755727 | 0.10770095 |
| 0.846328863 | 0.734842726 | 0.11148614 |
| 0.773999041 | 0.486298095 | 0.28770095 |
| 0.77755793  | 0.655650868 | 0.12190706 |
| 0.544172823 | 0.439508925 | 0.1046639  |
| 0.553520059 | 0.416445149 | 0.13707491 |
| 0.538206916 | 0.397442789 | 0.14076413 |
| 0.382518365 | 0.241593316 | 0.14092505 |
| 0.697322469 | 0.563986236 | 0.13333623 |
| 0.642776471 | 0.485827191 | 0.15694928 |
| 0.789385912 | 0.688111829 | 0.10127408 |
| 0.779318085 | 0.637141369 | 0.14217672 |
| 0.789534415 | 0.615803724 | 0.17373069 |
| 0.503971404 | 0.401211407 | 0.10276    |
| 0.854584709 | 0.742380399 | 0.11220431 |
| 0.438576378 | 0.335096101 | 0.10348028 |
| 0.671481472 | 0.569394528 | 0.10208694 |
| 0.691596959 | 0.589207953 | 0.10238901 |
| 0.710311567 | 0.56645387  | 0.1438577  |
| 0.700590473 | 0.554424649 | 0.14616582 |
| 0.659490636 | 0.498738597 | 0.16075204 |
| 0.367005044 | 0.245743099 | 0.12126194 |
| 0.288620944 | 0.187155421 | 0.10146552 |
| 0.421240857 | 0.297961558 | 0.1232793  |
| 0.688593725 | 0.585657494 | 0.10293623 |
| 0.626073844 | 0.478948285 | 0.14712556 |
| 0.819114727 | 0.701963824 | 0.1171509  |
| 0.888157161 | 0.781898806 | 0.10625836 |
| 0.517899674 | 0.40973359  | 0.10816608 |
| 0.29512911  | 0.175992533 | 0.11913658 |

|             |             |            |
|-------------|-------------|------------|
| 0.500648242 | 0.341696032 | 0.15895221 |
| 0.494341293 | 0.357921559 | 0.13641973 |
| 0.699716117 | 0.556753697 | 0.14296242 |
| 0.659274112 | 0.466019438 | 0.19325467 |
| 0.657378541 | 0.469716309 | 0.18766223 |
| 0.639863057 | 0.497356462 | 0.1425066  |
| 0.753005812 | 0.636770344 | 0.11623547 |
| 0.514402874 | 0.347975379 | 0.1664275  |
| 0.611948533 | 0.502021244 | 0.10992729 |
| 0.721801271 | 0.613117048 | 0.10868422 |
| 0.512374233 | 0.397606619 | 0.11476761 |
| 0.483865169 | 0.348625413 | 0.13523976 |
| 0.33806529  | 0.226988911 | 0.11107638 |
| 0.335081142 | 0.225216733 | 0.10986441 |
| 0.782630785 | 0.653926319 | 0.12870447 |
| 0.764984633 | 0.643838181 | 0.12114645 |
| 0.826482508 | 0.710271132 | 0.11621138 |
| 0.633074461 | 0.523948006 | 0.10912646 |
| 0.748415071 | 0.646739001 | 0.10167607 |
| 0.808120008 | 0.698812106 | 0.1093079  |
| 0.56534963  | 0.452282829 | 0.1130668  |
| 0.842794039 | 0.728922908 | 0.11387113 |
| 0.70126512  | 0.560555389 | 0.14070973 |
| 0.73269826  | 0.544238283 | 0.18845998 |
| 0.411873524 | 0.293472988 | 0.11840054 |
| 0.393621177 | 0.24325732  | 0.15036386 |
| 0.734260782 | 0.602107778 | 0.132153   |
| 0.619882455 | 0.463564148 | 0.15631831 |
| 0.805543086 | 0.635361741 | 0.17018134 |
| 0.554763199 | 0.406564492 | 0.14819871 |
| 0.772364451 | 0.657314799 | 0.11504965 |
| 0.503420858 | 0.272085601 | 0.23133526 |
| 0.571519935 | 0.44224995  | 0.12926999 |
| 0.579761917 | 0.478209366 | 0.10155255 |
| 0.667554722 | 0.558660239 | 0.10889448 |
| 0.277253315 | 0.140988195 | 0.13626512 |
| 0.411049365 | 0.295145213 | 0.11590415 |
| 0.776239188 | 0.641900952 | 0.13433824 |
| 0.750648477 | 0.644057275 | 0.1065912  |
| 0.573719598 | 0.44677033  | 0.12694927 |
| 0.60918104  | 0.484857242 | 0.1243238  |
| 0.493673408 | 0.380982234 | 0.11269117 |
| 0.789961604 | 0.680206871 | 0.10975473 |
| 0.708593591 | 0.467949362 | 0.24064423 |
| 0.748057876 | 0.496943477 | 0.2511144  |
| 0.676147151 | 0.548311607 | 0.12783554 |



|             |             |            |
|-------------|-------------|------------|
| 0.551476761 | 0.385848699 | 0.16562806 |
| 0.464948431 | 0.331677144 | 0.13327129 |
| 0.58550193  | 0.43935225  | 0.14614968 |
| 0.415049022 | 0.268055215 | 0.14699381 |
| 0.673708578 | 0.524149027 | 0.14955955 |
| 0.803673978 | 0.641619413 | 0.16205456 |
| 0.555590353 | 0.427974785 | 0.12761557 |
| 0.86845177  | 0.767332365 | 0.10111941 |
| 0.537328157 | 0.426555536 | 0.11077262 |
| 0.523149888 | 0.405714236 | 0.11743565 |
| 0.450698918 | 0.324262211 | 0.12643671 |
| 0.770078836 | 0.629710826 | 0.14036801 |
| 0.425716536 | 0.294520054 | 0.13119648 |
| 0.470123258 | 0.32259602  | 0.14752724 |
| 0.521087683 | 0.359844156 | 0.16124353 |
| 0.860672752 | 0.730712231 | 0.12996052 |
| 0.76029726  | 0.493913197 | 0.26638406 |
| 0.530083001 | 0.410535397 | 0.1195476  |
| 0.40711122  | 0.304802503 | 0.10230872 |
| 0.690044189 | 0.556721741 | 0.13332245 |
| 0.802558117 | 0.69300465  | 0.10955347 |
| 0.568420246 | 0.40922593  | 0.15919432 |
| 0.420958846 | 0.29311155  | 0.1278473  |
| 0.778890182 | 0.608620312 | 0.17026987 |
| 0.396187034 | 0.276800489 | 0.11938654 |
| 0.713636828 | 0.589801514 | 0.12383531 |
| 0.735181066 | 0.628141524 | 0.10703954 |
| 0.730614677 | 0.621855448 | 0.10875923 |
| 0.870173707 | 0.755405082 | 0.11476863 |
| 0.639139756 | 0.503617732 | 0.13552202 |
| 0.269130199 | 0.141663895 | 0.12746631 |
| 0.564622726 | 0.306284124 | 0.2583386  |
| 0.65685689  | 0.536343786 | 0.1205131  |
| 0.720931399 | 0.617267351 | 0.10366405 |
| 0.862683162 | 0.752054278 | 0.11062888 |
| 0.867574345 | 0.730308452 | 0.13726589 |
| 0.723553445 | 0.577635372 | 0.14591807 |
| 0.758828005 | 0.561695399 | 0.19713261 |
| 0.62608487  | 0.483207502 | 0.14287737 |
| 0.767327511 | 0.637920824 | 0.12940669 |
| 0.689008146 | 0.57799599  | 0.11101216 |
| 0.803275327 | 0.694516017 | 0.10875931 |
| 0.391515011 | 0.273583708 | 0.1179313  |
| 0.499085778 | 0.356137944 | 0.14294783 |
| 0.507733987 | 0.403823844 | 0.10391014 |
| 0.310633338 | 0.184672829 | 0.12596051 |

0.592759015 0.441750826 0.15100819  
0.439019693 0.327477384 0.11154231  
0.460189228 0.351324227 0.108865  
0.669462043 0.544854461 0.12460758  
0.585012591 0.440578601 0.14443399  
0.415329271 0.238109725 0.17721955  
0.622906193 0.478103411 0.14480278  
0.446199184 0.24776469 0.1984345  
0.884434987 0.758799248 0.12563574  
0.527462359 0.326751997 0.20071036  
0.505823988 0.367282113 0.13854188  
0.428565384 0.315867158 0.11269823  
0.732280671 0.609204561 0.12307611  
0.835748121 0.672635543 0.16311258  
0.498359388 0.357113605 0.14124578  
0.584008174 0.445701318 0.13830686  
0.762973736 0.658601092 0.10437264  
0.797390993 0.634990851 0.16240014  
0.852808522 0.675061889 0.17774663  
0.688583453 0.550335734 0.13824772  
0.462091248 0.270444289 0.19164696  
0.750604321 0.571001974 0.17960235  
0.874662119 0.66319881 0.21146331  
0.44181215 0.306330294 0.13548186  
0.528221941 0.41332719 0.11489475  
0.496964109 0.370777888 0.12618622  
0.626595581 0.460525099 0.16607048  
0.56252662 0.396026254 0.16650037  
0.349210837 0.167963061 0.18124778  
0.690566833 0.481856363 0.20871047  
0.71689281 0.447148444 0.26974437  
0.582754823 0.445578075 0.13717675  
0.551782649 0.354608694 0.19717395  
0.284565153 0.172363632 0.11220152  
0.56776114 0.429954157 0.13780698  
0.425365927 0.275687327 0.1496786  
0.719087979 0.562118345 0.15696964  
0.407017456 0.293990319 0.11302714  
0.766168258 0.632087456 0.1340808  
0.849400465 0.678751075 0.17064939  
0.528519248 0.4014762 0.12704305  
0.481555401 0.356942934 0.12461247  
0.740495998 0.640285718 0.10021028  
0.644703278 0.442002334 0.20270094  
0.255056693 0.153714087 0.10134261  
0.842077546 0.738665889 0.10341166

|             |             |            |
|-------------|-------------|------------|
| 0.70498001  | 0.591768628 | 0.11321138 |
| 0.427375269 | 0.29797785  | 0.12939742 |
| 0.584154313 | 0.40184955  | 0.18230476 |
| 0.811851475 | 0.676631728 | 0.13521975 |
| 0.816215853 | 0.713611398 | 0.10260445 |
| 0.604724555 | 0.478152135 | 0.12657242 |
| 0.507211536 | 0.349425149 | 0.15778639 |
| 0.54358273  | 0.400386506 | 0.14319622 |
| 0.477944914 | 0.329980812 | 0.1479641  |
| 0.701002804 | 0.590258913 | 0.11074389 |
| 0.334958313 | 0.196925389 | 0.13803292 |
| 0.497647205 | 0.386234577 | 0.11141263 |
| 0.906788828 | 0.777610333 | 0.1291785  |
| 0.429651681 | 0.269613438 | 0.16003824 |
| 0.436213249 | 0.296985159 | 0.13922809 |
| 0.556123687 | 0.451346067 | 0.10477762 |
| 0.668714012 | 0.563668502 | 0.10504551 |
| 0.325407745 | 0.216590656 | 0.10881709 |
| 0.654899186 | 0.481649749 | 0.17324944 |
| 0.490821242 | 0.330854491 | 0.15996675 |
| 0.517084014 | 0.377346368 | 0.13973765 |
| 0.761352901 | 0.649570812 | 0.11178209 |
| 0.732743415 | 0.598338314 | 0.1344051  |
| 0.49976516  | 0.325345874 | 0.17441929 |
| 0.716966323 | 0.530161705 | 0.18680462 |
| 0.451558557 | 0.326768034 | 0.12479052 |
| 0.723324534 | 0.583394256 | 0.13993028 |
| 0.717320539 | 0.5803277   | 0.13699284 |
| 0.735906915 | 0.62407329  | 0.11183363 |
| 0.694815716 | 0.513464555 | 0.18135116 |
| 0.536744215 | 0.35123989  | 0.18550433 |
| 0.737109278 | 0.538504721 | 0.19860456 |
| 0.653310226 | 0.534390907 | 0.11891932 |
| 0.800386601 | 0.672349564 | 0.12803704 |
| 0.512006068 | 0.373803631 | 0.13820244 |
| 0.605845504 | 0.443057624 | 0.16278788 |
| 0.833708029 | 0.721468029 | 0.11224    |
| 0.559388763 | 0.433019259 | 0.1263695  |
| 0.544235272 | 0.431765755 | 0.11246952 |
| 0.610710804 | 0.491001132 | 0.11970967 |
| 0.537711987 | 0.411247624 | 0.12646436 |
| 0.461472011 | 0.311314827 | 0.15015718 |
| 0.288626534 | 0.178831283 | 0.10979525 |
| 0.483939398 | 0.31890849  | 0.16503091 |
| 0.717507849 | 0.56545371  | 0.15205414 |
| 0.460147052 | 0.341825412 | 0.11832164 |

|             |             |            |
|-------------|-------------|------------|
| 0.635800935 | 0.521123693 | 0.11467724 |
| 0.627000053 | 0.491807558 | 0.1351925  |
| 0.595501444 | 0.419433828 | 0.17606762 |
| 0.745038049 | 0.623571549 | 0.1214665  |
| 0.581461485 | 0.44755654  | 0.13390495 |
| 0.748087114 | 0.625474851 | 0.12261226 |
| 0.596356181 | 0.490175901 | 0.10618028 |
| 0.537091301 | 0.39241486  | 0.14467644 |
| 0.628230809 | 0.43685871  | 0.1913721  |
| 0.601142061 | 0.418993893 | 0.18214817 |
| 0.686376071 | 0.559776656 | 0.12659942 |
| 0.481451693 | 0.381447889 | 0.1000038  |
| 0.503436191 | 0.386898478 | 0.11653771 |
| 0.445538324 | 0.341970571 | 0.10356775 |
| 0.286210438 | 0.162125232 | 0.12408521 |
| 0.623398437 | 0.490422797 | 0.13297564 |
| 0.358744464 | 0.215219523 | 0.14352494 |
| 0.449646279 | 0.320564875 | 0.1290814  |
| 0.675972365 | 0.574529859 | 0.10144251 |
| 0.400113341 | 0.293567668 | 0.10654567 |
| 0.780854986 | 0.613532715 | 0.16732227 |
| 0.822963781 | 0.655381304 | 0.16758248 |
| 0.33954134  | 0.231302452 | 0.10823889 |
| 0.649498097 | 0.547866885 | 0.10163121 |
| 0.312306155 | 0.175880521 | 0.13642563 |
| 0.861881042 | 0.757833309 | 0.10404773 |
| 0.867206345 | 0.752531011 | 0.11467533 |
| 0.847972173 | 0.737803204 | 0.11016897 |
| 0.67135972  | 0.530843001 | 0.14051672 |
| 0.612171449 | 0.5031462   | 0.10902525 |
| 0.789841591 | 0.65052712  | 0.13931447 |
| 0.609406109 | 0.379004102 | 0.23040201 |
| 0.577984508 | 0.436744961 | 0.14123955 |
| 0.759136867 | 0.521910721 | 0.23722615 |
| 0.838230342 | 0.701020453 | 0.13720989 |
| 0.518065695 | 0.35083796  | 0.16722774 |
| 0.703306134 | 0.593612532 | 0.1096936  |
| 0.726513804 | 0.587112916 | 0.13940089 |
| 0.286862683 | 0.147245669 | 0.13961701 |
| 0.590197299 | 0.468646899 | 0.1215504  |
| 0.586056192 | 0.458607756 | 0.12744844 |
| 0.289814991 | 0.177873714 | 0.11194128 |
| 0.537118446 | 0.430335308 | 0.10678314 |
| 0.333837252 | 0.193635041 | 0.14020221 |
| 0.675300887 | 0.55308515  | 0.12221574 |
| 0.856384407 | 0.715434648 | 0.14094976 |

|             |             |            |
|-------------|-------------|------------|
| 0.511627392 | 0.35563956  | 0.15598783 |
| 0.504142756 | 0.339386264 | 0.16475649 |
| 0.298377169 | 0.19480986  | 0.10356731 |
| 0.568503946 | 0.439143293 | 0.12936065 |
| 0.516411466 | 0.39496001  | 0.12145146 |
| 0.742816072 | 0.612483077 | 0.130333   |
| 0.370273588 | 0.250190685 | 0.1200829  |
| 0.702372215 | 0.581229574 | 0.12114264 |
| 0.774554188 | 0.634545687 | 0.1400085  |
| 0.783283951 | 0.631192938 | 0.15209101 |
| 0.544750383 | 0.44417928  | 0.1005711  |
| 0.635719434 | 0.481541201 | 0.15417823 |
| 0.619945334 | 0.4549813   | 0.16496403 |
| 0.673240281 | 0.491803391 | 0.18143689 |
| 0.364332984 | 0.231714445 | 0.13261854 |
| 0.455909668 | 0.354442038 | 0.10146763 |
| 0.597185209 | 0.390782859 | 0.20640235 |
| 0.46171199  | 0.359422364 | 0.10228963 |
| 0.59998867  | 0.451206047 | 0.14878262 |
| 0.555837544 | 0.39197055  | 0.16386699 |
| 0.880446157 | 0.762610521 | 0.11783564 |
| 0.69659254  | 0.590484636 | 0.1061079  |
| 0.786686451 | 0.658826078 | 0.12786037 |
| 0.424853811 | 0.28198412  | 0.14286969 |
| 0.785222362 | 0.569257347 | 0.21596502 |
| 0.401042233 | 0.26558593  | 0.1354563  |
| 0.586273383 | 0.466204224 | 0.12006916 |
| 0.870093418 | 0.739323304 | 0.13077011 |
| 0.348295244 | 0.216793818 | 0.13150143 |
| 0.700133762 | 0.563717826 | 0.13641594 |
| 0.46277442  | 0.353996364 | 0.10877806 |
| 0.721653719 | 0.583988824 | 0.1376649  |
| 0.665315884 | 0.545338888 | 0.119977   |
| 0.452798062 | 0.277420886 | 0.17537718 |
| 0.377435044 | 0.138771037 | 0.23866401 |
| 0.786944151 | 0.670830955 | 0.1161132  |
| 0.364287172 | 0.192692495 | 0.17159468 |
| 0.489928151 | 0.305647329 | 0.18428082 |
| 0.741146317 | 0.617176235 | 0.12397008 |
| 0.572586176 | 0.470549961 | 0.10203622 |
| 0.533797648 | 0.355640779 | 0.17815687 |
| 0.748113652 | 0.644226429 | 0.10388722 |
| 0.592049896 | 0.459755398 | 0.1322945  |
| 0.554695267 | 0.393078601 | 0.16161667 |
| 0.861433243 | 0.649470518 | 0.21196273 |
| 0.358759867 | 0.256528655 | 0.10223121 |

|             |             |            |
|-------------|-------------|------------|
| 0.748237543 | 0.604090734 | 0.14414681 |
| 0.382059007 | 0.276437914 | 0.10562109 |
| 0.466974035 | 0.352527401 | 0.11444663 |
| 0.741604726 | 0.605233179 | 0.13637155 |
| 0.758053012 | 0.642710187 | 0.11534283 |
| 0.697085986 | 0.545638241 | 0.15144774 |
| 0.820324551 | 0.717087266 | 0.10323729 |
| 0.526733685 | 0.419272029 | 0.10746166 |
| 0.286837218 | 0.156705389 | 0.13013183 |
| 0.636485462 | 0.469478066 | 0.1670074  |
| 0.684124837 | 0.55547843  | 0.12864641 |
| 0.78987367  | 0.679382641 | 0.11049103 |
| 0.571227967 | 0.409153138 | 0.16207483 |
| 0.780236879 | 0.648540462 | 0.13169642 |
| 0.326014238 | 0.191355979 | 0.13465826 |
| 0.543818442 | 0.426798587 | 0.11701986 |
| 0.618952108 | 0.339411999 | 0.27954011 |
| 0.32253754  | 0.191398722 | 0.13113882 |
| 0.566522967 | 0.388688435 | 0.17783453 |
| 0.590371589 | 0.472405678 | 0.11796591 |
| 0.513194877 | 0.338347722 | 0.17484716 |
| 0.745681448 | 0.635147561 | 0.11053389 |
| 0.589210549 | 0.4844889   | 0.10472165 |
| 0.472294029 | 0.301835982 | 0.17045805 |
| 0.622104909 | 0.440132433 | 0.18197248 |
| 0.698024722 | 0.547814843 | 0.15020988 |
| 0.417043552 | 0.275114792 | 0.14192876 |
| 0.668544243 | 0.541870993 | 0.12667325 |
| 0.633921527 | 0.474996131 | 0.1589254  |
| 0.386026985 | 0.282019352 | 0.10400763 |
| 0.607398202 | 0.482501417 | 0.12489679 |
| 0.50155535  | 0.396449846 | 0.1051055  |
| 0.8885377   | 0.695750224 | 0.19278748 |
| 0.689999591 | 0.483854658 | 0.20614493 |
| 0.385280549 | 0.267063979 | 0.11821657 |
| 0.496954905 | 0.352852332 | 0.14410257 |
| 0.550834094 | 0.419192293 | 0.1316418  |
| 0.62888157  | 0.517185381 | 0.11169619 |
| 0.803101294 | 0.690704924 | 0.11239637 |
| 0.834606086 | 0.700447751 | 0.13415834 |
| 0.63331377  | 0.45274357  | 0.1805702  |
| 0.307766852 | 0.192155439 | 0.11561141 |
| 0.24198411  | 0.12824995  | 0.11373416 |
| 0.796396467 | 0.688158771 | 0.1082377  |
| 0.778564963 | 0.671851916 | 0.10671305 |
| 0.773427458 | 0.650616189 | 0.12281127 |

|             |             |            |
|-------------|-------------|------------|
| 0.459842429 | 0.327977779 | 0.13186465 |
| 0.375865975 | 0.254682745 | 0.12118323 |
| 0.584250279 | 0.474333877 | 0.1099164  |
| 0.394325147 | 0.256030495 | 0.13829465 |
| 0.585016554 | 0.429482623 | 0.15553393 |
| 0.544634754 | 0.380781678 | 0.16385308 |
| 0.603334399 | 0.436564505 | 0.1667699  |
| 0.435041308 | 0.284183097 | 0.15085821 |
| 0.872307535 | 0.710218515 | 0.16208902 |
| 0.479400879 | 0.358674755 | 0.12072612 |
| 0.471725972 | 0.348183213 | 0.12354276 |
| 0.575881896 | 0.456541534 | 0.11934036 |
| 0.71971563  | 0.597672519 | 0.12204311 |
| 0.678679572 | 0.56791923  | 0.11076034 |
| 0.394952829 | 0.254888825 | 0.140064   |
| 0.504845581 | 0.36144539  | 0.14340019 |
| 0.538895763 | 0.384315382 | 0.15458038 |
| 0.707428456 | 0.599387611 | 0.10804085 |
| 0.589070087 | 0.471226893 | 0.11784319 |
| 0.565161781 | 0.461067236 | 0.10409455 |
| 0.427753042 | 0.300914527 | 0.12683852 |
| 0.538617882 | 0.391489351 | 0.14712853 |
| 0.393851749 | 0.242120157 | 0.15173159 |
| 0.622789623 | 0.498152051 | 0.12463757 |
| 0.830376567 | 0.728289079 | 0.10208749 |
| 0.842383131 | 0.68242486  | 0.15995827 |
| 0.586537125 | 0.471738617 | 0.11479851 |
| 0.744493265 | 0.62794544  | 0.11654783 |
| 0.642162111 | 0.523426021 | 0.11873609 |
| 0.416426482 | 0.285411427 | 0.13101505 |
| 0.438167981 | 0.242406673 | 0.19576131 |
| 0.558424057 | 0.437295366 | 0.12112869 |
| 0.846534602 | 0.661962145 | 0.18457246 |
| 0.579629732 | 0.460628739 | 0.11900099 |
| 0.614393458 | 0.483003986 | 0.13138947 |
| 0.759481365 | 0.621417811 | 0.13806355 |
| 0.712834102 | 0.532657943 | 0.18017616 |
| 0.517361396 | 0.402001695 | 0.1153597  |
| 0.838449914 | 0.695213582 | 0.14323633 |
| 0.559588332 | 0.389305418 | 0.17028291 |
| 0.50356026  | 0.390893464 | 0.1126668  |
| 0.625416273 | 0.440888659 | 0.18452761 |
| 0.707128186 | 0.541344638 | 0.16578355 |
| 0.335131935 | 0.232142692 | 0.10298924 |
| 0.610919039 | 0.463491445 | 0.14742759 |
| 0.57469083  | 0.331780562 | 0.24291027 |

|             |             |            |
|-------------|-------------|------------|
| 0.39154603  | 0.280337183 | 0.11120885 |
| 0.802861911 | 0.69965146  | 0.10321045 |
| 0.581025508 | 0.43536613  | 0.14565938 |
| 0.739132526 | 0.591682928 | 0.1474496  |
| 0.789824464 | 0.609912654 | 0.17991181 |
| 0.561229436 | 0.358205162 | 0.20302427 |
| 0.617927718 | 0.425844728 | 0.19208299 |
| 0.775532408 | 0.669114004 | 0.10641841 |
| 0.82090973  | 0.678252776 | 0.14265695 |
| 0.796766354 | 0.696347421 | 0.10041893 |
| 0.476441667 | 0.375581162 | 0.10086051 |
| 0.856606058 | 0.727665888 | 0.12894017 |
| 0.840114571 | 0.709923453 | 0.13019112 |
| 0.459688369 | 0.31562581  | 0.14406256 |
| 0.232107003 | 0.129116841 | 0.10299016 |
| 0.602368169 | 0.363619248 | 0.23874892 |
| 0.824861176 | 0.690633235 | 0.13422794 |
| 0.74274585  | 0.569419685 | 0.17332617 |
| 0.390430474 | 0.288839701 | 0.10159077 |
| 0.773225423 | 0.648906278 | 0.12431915 |
| 0.83158218  | 0.673704667 | 0.15787751 |
| 0.788544172 | 0.59192272  | 0.19662145 |
| 0.472849898 | 0.334716034 | 0.13813386 |
| 0.682267605 | 0.504484308 | 0.1777833  |
| 0.761544331 | 0.62701324  | 0.13453109 |
| 0.470175295 | 0.363053261 | 0.10712203 |
| 0.873258561 | 0.711467178 | 0.16179138 |
| 0.539325313 | 0.384093227 | 0.15523209 |
| 0.685449572 | 0.494720093 | 0.19072948 |
| 0.408589711 | 0.303970992 | 0.10461872 |
| 0.686716542 | 0.548451265 | 0.13826528 |
| 0.729843188 | 0.561016434 | 0.16882675 |
| 0.707300726 | 0.571926711 | 0.13537402 |
| 0.546810913 | 0.345334866 | 0.20147605 |
| 0.353415333 | 0.246080416 | 0.10733492 |
| 0.898310746 | 0.77672669  | 0.12158406 |
| 0.829510051 | 0.704708938 | 0.12480111 |
| 0.493938377 | 0.333801591 | 0.16013679 |
| 0.845734854 | 0.722823541 | 0.12291131 |
| 0.533137819 | 0.428172166 | 0.10496565 |
| 0.565288545 | 0.461033953 | 0.10425459 |
| 0.509107876 | 0.397872931 | 0.11123495 |
| 0.560052171 | 0.397093847 | 0.16295832 |
| 0.507634483 | 0.318735113 | 0.18889937 |
| 0.827249307 | 0.719114471 | 0.10813484 |
| 0.772521123 | 0.650465457 | 0.12205567 |



|             |             |            |
|-------------|-------------|------------|
| 0.792625899 | 0.687338407 | 0.10528749 |
| 0.623235435 | 0.500518714 | 0.12271672 |
| 0.660709545 | 0.524004819 | 0.13670473 |
| 0.619927186 | 0.467661762 | 0.15226542 |
| 0.692580727 | 0.589148155 | 0.10343257 |
| 0.29242962  | 0.176521659 | 0.11590796 |
| 0.756094464 | 0.601692253 | 0.15440221 |
| 0.67734235  | 0.514496564 | 0.16284579 |
| 0.827156669 | 0.699631321 | 0.12752535 |
| 0.504930569 | 0.380503822 | 0.12442675 |
| 0.523110899 | 0.361946538 | 0.16116436 |
| 0.554857085 | 0.392009673 | 0.16284741 |
| 0.503055252 | 0.382698014 | 0.12035724 |
| 0.609235512 | 0.445453513 | 0.163782   |
| 0.648597066 | 0.515273095 | 0.13332397 |
| 0.629770404 | 0.515089768 | 0.11468064 |
| 0.90734638  | 0.772471035 | 0.13487535 |
| 0.773446588 | 0.641253597 | 0.13219299 |
| 0.681393948 | 0.50812594  | 0.17326801 |
| 0.902288478 | 0.79363917  | 0.10864931 |
| 0.372298342 | 0.236814452 | 0.13548389 |
| 0.540261818 | 0.315446188 | 0.22481563 |
| 0.566356895 | 0.463025529 | 0.10333137 |
| 0.747080259 | 0.636476746 | 0.11060351 |
| 0.47297773  | 0.346547084 | 0.12643065 |
| 0.458502219 | 0.288031259 | 0.17047096 |
| 0.764414367 | 0.640674238 | 0.12374013 |
| 0.763673962 | 0.605803732 | 0.15787023 |
| 0.447792406 | 0.307877852 | 0.13991455 |
| 0.523733484 | 0.422207171 | 0.10152631 |
| 0.376795657 | 0.243678668 | 0.13311699 |
| 0.784456166 | 0.609458547 | 0.17499762 |
| 0.622535744 | 0.49264399  | 0.12989175 |
| 0.513197374 | 0.383904654 | 0.12929272 |
| 0.605231989 | 0.441994149 | 0.16323784 |
| 0.720441213 | 0.517732053 | 0.20270916 |
| 0.756334492 | 0.64929929  | 0.1070352  |
| 0.834692315 | 0.699486359 | 0.13520596 |
| 0.5590526   | 0.446425645 | 0.11262696 |
| 0.381296729 | 0.24506803  | 0.1362287  |
| 0.301620165 | 0.186034681 | 0.11558548 |
| 0.719158268 | 0.615899298 | 0.10325897 |
| 0.406019394 | 0.273929242 | 0.13209015 |
| 0.83416527  | 0.701460714 | 0.13270456 |
| 0.874068303 | 0.767660277 | 0.10640803 |
| 0.853599756 | 0.724447326 | 0.12915243 |

|             |             |            |
|-------------|-------------|------------|
| 0.283082066 | 0.172017418 | 0.11106465 |
| 0.281651443 | 0.16134718  | 0.12030426 |
| 0.322621861 | 0.201576818 | 0.12104504 |
| 0.625457604 | 0.466994937 | 0.15846267 |
| 0.656029059 | 0.514936996 | 0.14109206 |
| 0.282962062 | 0.174395215 | 0.10856685 |
| 0.891372069 | 0.757685806 | 0.13368626 |
| 0.678667352 | 0.476023676 | 0.20264368 |
| 0.532355102 | 0.383702899 | 0.1486522  |
| 0.822009814 | 0.712059828 | 0.10994999 |
| 0.893935323 | 0.76577143  | 0.12816389 |
| 0.792541624 | 0.687032452 | 0.10550917 |
| 0.786910134 | 0.652698227 | 0.13421191 |
| 0.587839461 | 0.439087573 | 0.14875189 |
| 0.674033673 | 0.464571848 | 0.20946182 |
| 0.303427349 | 0.197635939 | 0.10579141 |
| 0.622323641 | 0.475262719 | 0.14706092 |
| 0.277153444 | 0.13831069  | 0.13884275 |
| 0.874581456 | 0.769319548 | 0.10526191 |
| 0.508063949 | 0.377634654 | 0.1304293  |
| 0.819043407 | 0.638496635 | 0.18054677 |
| 0.829996139 | 0.697626562 | 0.13236958 |
| 0.652772188 | 0.528781673 | 0.12399052 |
| 0.908682978 | 0.802882513 | 0.10580047 |
| 0.271974798 | 0.171881344 | 0.10009345 |
| 0.637770239 | 0.537669481 | 0.10010076 |
| 0.496713324 | 0.396611326 | 0.100102   |
| 0.799524301 | 0.699389638 | 0.10013466 |
| 0.681205958 | 0.580916247 | 0.10028971 |
| 0.89482356  | 0.79451746  | 0.1003061  |
| 0.371053083 | 0.270696767 | 0.10035632 |
| 0.401673611 | 0.301316228 | 0.10035738 |
| 0.840123524 | 0.739754862 | 0.10036866 |
| 0.674800217 | 0.574391123 | 0.10040909 |
| 0.504336328 | 0.403853052 | 0.10048328 |
| 0.693129158 | 0.592641708 | 0.10048745 |
| 0.78634942  | 0.685846238 | 0.10050318 |
| 0.362094041 | 0.261553015 | 0.10054103 |
| 0.515794443 | 0.415225635 | 0.10056881 |
| 0.532344275 | 0.431763022 | 0.10058125 |
| 0.380040039 | 0.27942347  | 0.10061657 |
| 0.327017372 | 0.226384501 | 0.10063287 |
| 0.854272162 | 0.753564997 | 0.10070717 |
| 0.725990633 | 0.625277236 | 0.1007134  |
| 0.261429144 | 0.160672373 | 0.10075677 |
| 0.804268936 | 0.703414905 | 0.10085403 |

|             |             |            |
|-------------|-------------|------------|
| 0.746630207 | 0.645679613 | 0.1009506  |
| 0.660270916 | 0.559275393 | 0.10099552 |
| 0.62757409  | 0.526452372 | 0.10112172 |
| 0.272981664 | 0.171817481 | 0.10116418 |
| 0.247767702 | 0.146568557 | 0.10119915 |
| 0.283066866 | 0.181826989 | 0.10123988 |
| 0.838125339 | 0.736875149 | 0.10125019 |
| 0.457331333 | 0.356047402 | 0.10128393 |
| 0.603554759 | 0.502182056 | 0.1013727  |
| 0.320964575 | 0.219547742 | 0.10141683 |
| 0.247336311 | 0.145791532 | 0.10154478 |
| 0.547666745 | 0.446083466 | 0.10158328 |
| 0.841817002 | 0.74021844  | 0.10159856 |
| 0.868591907 | 0.766965901 | 0.10162601 |
| 0.256879603 | 0.155178971 | 0.10170063 |
| 0.79562588  | 0.693922492 | 0.10170339 |
| 0.50105039  | 0.399330983 | 0.10171941 |
| 0.693975224 | 0.592143417 | 0.10183181 |
| 0.828773741 | 0.726927827 | 0.10184591 |
| 0.882559131 | 0.780713049 | 0.10184608 |
| 0.377773754 | 0.275831651 | 0.1019421  |
| 0.513630497 | 0.411663475 | 0.10196702 |
| 0.775098843 | 0.673080943 | 0.1020179  |
| 0.831980033 | 0.729920822 | 0.10205921 |
| 0.745181501 | 0.642875438 | 0.10230606 |
| 0.621788417 | 0.519477835 | 0.10231058 |
| 0.669232061 | 0.566857704 | 0.10237436 |
| 0.323556774 | 0.221120635 | 0.10243614 |
| 0.260456252 | 0.157960817 | 0.10249544 |
| 0.725813653 | 0.623311508 | 0.10250215 |
| 0.337772841 | 0.235161618 | 0.10261122 |
| 0.664322136 | 0.561669142 | 0.10265299 |
| 0.741043392 | 0.638367648 | 0.10267574 |
| 0.631005638 | 0.528286857 | 0.10271878 |
| 0.62967103  | 0.526848163 | 0.10282287 |
| 0.791518977 | 0.688645863 | 0.10287311 |
| 0.306665164 | 0.20377756  | 0.1028876  |
| 0.445268234 | 0.342336413 | 0.10293182 |
| 0.540373006 | 0.437358343 | 0.10301466 |
| 0.80933378  | 0.706216788 | 0.10311699 |
| 0.754823963 | 0.651683497 | 0.10314047 |
| 0.389902372 | 0.286735501 | 0.10316687 |
| 0.797226115 | 0.69398338  | 0.10324274 |
| 0.440346611 | 0.337091707 | 0.1032549  |
| 0.364697832 | 0.261442625 | 0.10325521 |
| 0.695844468 | 0.592519825 | 0.10332464 |

|             |             |            |
|-------------|-------------|------------|
| 0.718292201 | 0.61495228  | 0.10333992 |
| 0.704804797 | 0.601433475 | 0.10337132 |
| 0.730142812 | 0.626737149 | 0.10340566 |
| 0.80697787  | 0.70351114  | 0.10346673 |
| 0.842449315 | 0.738927244 | 0.10352207 |
| 0.413092002 | 0.309569198 | 0.1035228  |
| 0.447061968 | 0.343505932 | 0.10355604 |
| 0.4585501   | 0.35491115  | 0.10363895 |
| 0.798993462 | 0.695349212 | 0.10364425 |
| 0.279489372 | 0.175800589 | 0.10368878 |
| 0.829211847 | 0.725478502 | 0.10373334 |
| 0.344520761 | 0.240753062 | 0.1037677  |
| 0.829004987 | 0.725232764 | 0.10377222 |
| 0.776097425 | 0.672221097 | 0.10387633 |
| 0.71675648  | 0.61287217  | 0.10388431 |
| 0.574813336 | 0.470921537 | 0.1038918  |
| 0.582615186 | 0.478651324 | 0.10396386 |
| 0.848799458 | 0.74482358  | 0.10397588 |
| 0.589493785 | 0.485499409 | 0.10399438 |
| 0.39808321  | 0.294085598 | 0.10399761 |
| 0.765071862 | 0.661068536 | 0.10400333 |
| 0.842742342 | 0.738722096 | 0.10402025 |
| 0.286211471 | 0.182094203 | 0.10411727 |
| 0.857543174 | 0.753361067 | 0.10418211 |
| 0.271034707 | 0.166718275 | 0.10431643 |
| 0.707107192 | 0.60278416  | 0.10432303 |
| 0.865759052 | 0.761423361 | 0.10433569 |
| 0.719701856 | 0.615348942 | 0.10435291 |
| 0.432127954 | 0.327726994 | 0.10440096 |
| 0.265958636 | 0.161543737 | 0.1044149  |
| 0.7023836   | 0.597908962 | 0.10447464 |
| 0.582116228 | 0.477504611 | 0.10461162 |
| 0.646104407 | 0.541476442 | 0.10462797 |
| 0.442955867 | 0.338267509 | 0.10468836 |
| 0.318337266 | 0.21363815  | 0.10469912 |
| 0.875118916 | 0.770368038 | 0.10475088 |
| 0.648854532 | 0.543932643 | 0.10492189 |
| 0.733198859 | 0.628266271 | 0.10493259 |
| 0.503807895 | 0.398838299 | 0.1049696  |
| 0.502568333 | 0.397587663 | 0.10498067 |
| 0.799336032 | 0.694274054 | 0.10506198 |
| 0.751914783 | 0.646820683 | 0.1050941  |
| 0.869616123 | 0.764463213 | 0.10515291 |
| 0.745964694 | 0.640802395 | 0.1051623  |
| 0.48192799  | 0.376758818 | 0.10516917 |
| 0.479007472 | 0.37383607  | 0.1051714  |

|             |             |            |
|-------------|-------------|------------|
| 0.444517419 | 0.339326179 | 0.10519124 |
| 0.626215306 | 0.520972942 | 0.10524236 |
| 0.711122932 | 0.605865249 | 0.10525768 |
| 0.510048653 | 0.404700194 | 0.10534846 |
| 0.695162831 | 0.589777691 | 0.10538514 |
| 0.682410626 | 0.577024611 | 0.10538602 |
| 0.584487727 | 0.479038001 | 0.10544973 |
| 0.747965643 | 0.642451493 | 0.10551415 |
| 0.626529433 | 0.5210005   | 0.10552893 |
| 0.578565079 | 0.472996988 | 0.10556809 |
| 0.794166327 | 0.688515695 | 0.10565063 |
| 0.581385749 | 0.475697547 | 0.1056882  |
| 0.631302145 | 0.525611225 | 0.10569092 |
| 0.860704784 | 0.754976313 | 0.10572847 |
| 0.818535975 | 0.712752152 | 0.10578382 |
| 0.287474306 | 0.181644485 | 0.10582982 |
| 0.314698278 | 0.208832571 | 0.10586571 |
| 0.839607778 | 0.733700582 | 0.1059072  |
| 0.800218798 | 0.694117373 | 0.10610143 |
| 0.814168439 | 0.708047428 | 0.10612101 |
| 0.891362472 | 0.785118494 | 0.10624398 |
| 0.654207063 | 0.547847086 | 0.10635998 |
| 0.709210187 | 0.602822242 | 0.10638795 |
| 0.263220123 | 0.156792119 | 0.10642801 |
| 0.314725229 | 0.208274961 | 0.10645027 |
| 0.633556605 | 0.527052173 | 0.10650443 |
| 0.34659875  | 0.240090452 | 0.1065083  |
| 0.409921077 | 0.303396788 | 0.10652429 |
| 0.54635072  | 0.439708092 | 0.10664263 |
| 0.613345755 | 0.506702412 | 0.10664334 |
| 0.47685872  | 0.370204217 | 0.1066545  |
| 0.817358753 | 0.710696492 | 0.10666226 |
| 0.782447852 | 0.675770712 | 0.10667714 |
| 0.428040002 | 0.32134837  | 0.10669163 |
| 0.730030429 | 0.623214478 | 0.10681595 |
| 0.791593594 | 0.684763541 | 0.10683005 |
| 0.630945738 | 0.524079347 | 0.10686639 |
| 0.613538286 | 0.506640659 | 0.10689763 |
| 0.383607396 | 0.276620296 | 0.1069871  |
| 0.694206782 | 0.587148334 | 0.10705845 |
| 0.769828389 | 0.662738595 | 0.10708979 |
| 0.558375302 | 0.451276232 | 0.10709907 |
| 0.848415625 | 0.741175242 | 0.10724038 |
| 0.500099714 | 0.392847706 | 0.10725201 |
| 0.732855865 | 0.625547226 | 0.10730864 |
| 0.557174207 | 0.449689203 | 0.107485   |

|             |             |            |
|-------------|-------------|------------|
| 0.755428634 | 0.647845002 | 0.10758363 |
| 0.259713488 | 0.152089794 | 0.10762369 |
| 0.64715337  | 0.539431904 | 0.10772147 |
| 0.561044031 | 0.453299998 | 0.10774403 |
| 0.387126719 | 0.279378858 | 0.10774786 |
| 0.776459037 | 0.668685854 | 0.10777318 |
| 0.468060116 | 0.36027923  | 0.10778089 |
| 0.785702308 | 0.677920195 | 0.10778211 |
| 0.493548704 | 0.385760264 | 0.10778844 |
| 0.754769172 | 0.646942067 | 0.1078271  |
| 0.860956211 | 0.753069825 | 0.10788639 |
| 0.381530424 | 0.273627409 | 0.10790302 |
| 0.621641449 | 0.513663993 | 0.10797746 |
| 0.276054712 | 0.167959705 | 0.10809501 |
| 0.344723931 | 0.236620065 | 0.10810387 |
| 0.283869406 | 0.175668864 | 0.10820054 |
| 0.759273371 | 0.651051443 | 0.10822193 |
| 0.709658543 | 0.601327125 | 0.10833142 |
| 0.826909746 | 0.718577782 | 0.10833196 |
| 0.387085364 | 0.278717936 | 0.10836743 |
| 0.704225394 | 0.595816284 | 0.10840911 |
| 0.806917878 | 0.698467078 | 0.1084508  |
| 0.891472795 | 0.782956696 | 0.1085161  |
| 0.658856502 | 0.550263434 | 0.10859307 |
| 0.83746983  | 0.728840657 | 0.10862917 |
| 0.451567882 | 0.342905179 | 0.1086627  |
| 0.728471848 | 0.619738063 | 0.10873379 |
| 0.662619953 | 0.553852043 | 0.10876791 |
| 0.870453965 | 0.761671824 | 0.10878214 |
| 0.740186098 | 0.631397648 | 0.10878845 |
| 0.49312106  | 0.384328716 | 0.10879234 |
| 0.672319302 | 0.563505322 | 0.10881398 |
| 0.257326368 | 0.148465243 | 0.10886113 |
| 0.318775516 | 0.209905848 | 0.10886967 |
| 0.500688009 | 0.391787803 | 0.10890021 |
| 0.416550966 | 0.307638702 | 0.10891226 |
| 0.765801089 | 0.656835343 | 0.10896575 |
| 0.613750362 | 0.504672209 | 0.10907815 |
| 0.74233026  | 0.633225655 | 0.10910461 |
| 0.624959316 | 0.515796307 | 0.10916301 |
| 0.244134382 | 0.134950039 | 0.10918434 |
| 0.652319832 | 0.543134187 | 0.10918565 |
| 0.625654516 | 0.516423181 | 0.10923134 |
| 0.742885295 | 0.633581712 | 0.10930358 |
| 0.849268609 | 0.739866648 | 0.10940196 |
| 0.55509098  | 0.44563837  | 0.10945261 |

|             |             |            |
|-------------|-------------|------------|
| 0.544879081 | 0.435388992 | 0.10949009 |
| 0.791746766 | 0.682251714 | 0.10949505 |
| 0.626285721 | 0.516790563 | 0.10949516 |
| 0.617373051 | 0.507821991 | 0.10955106 |
| 0.746121976 | 0.636529759 | 0.10959222 |
| 0.840293049 | 0.730582699 | 0.10971035 |
| 0.322190911 | 0.212430141 | 0.10976077 |
| 0.333295587 | 0.223484617 | 0.10981097 |
| 0.619326233 | 0.509430919 | 0.10989531 |
| 0.396843964 | 0.286839889 | 0.11000408 |
| 0.371456153 | 0.261416391 | 0.11003976 |
| 0.758734605 | 0.64865535  | 0.11007925 |
| 0.471823779 | 0.361707818 | 0.11011596 |
| 0.516193946 | 0.406058858 | 0.11013509 |
| 0.823948232 | 0.713803204 | 0.11014503 |
| 0.904069735 | 0.793888305 | 0.11018143 |
| 0.295467098 | 0.185211832 | 0.11025527 |
| 0.313318327 | 0.20296925  | 0.11034908 |
| 0.462014757 | 0.351660153 | 0.1103546  |
| 0.424286865 | 0.31392877  | 0.1103581  |
| 0.336631938 | 0.226135889 | 0.11049605 |
| 0.857252629 | 0.746623787 | 0.11062884 |
| 0.859484044 | 0.74885236  | 0.11063169 |
| 0.727819012 | 0.617068197 | 0.11075082 |
| 0.788962754 | 0.678193316 | 0.11076944 |
| 0.425662384 | 0.314890071 | 0.11077231 |
| 0.8501981   | 0.739425367 | 0.11077273 |
| 0.732595453 | 0.621793827 | 0.11080163 |
| 0.737241803 | 0.626419429 | 0.11082237 |
| 0.822405963 | 0.711558415 | 0.11084755 |
| 0.382892651 | 0.272043456 | 0.1108492  |
| 0.561440532 | 0.450564297 | 0.11087623 |
| 0.761405499 | 0.650448598 | 0.1109569  |
| 0.365181867 | 0.254181747 | 0.11100012 |
| 0.335934526 | 0.224915583 | 0.11101894 |
| 0.696754587 | 0.585726504 | 0.11102808 |
| 0.763709193 | 0.652657583 | 0.11105161 |
| 0.55398111  | 0.442914306 | 0.1110668  |
| 0.320701444 | 0.209593629 | 0.11110782 |
| 0.751970064 | 0.640826824 | 0.11114324 |
| 0.491292268 | 0.380053125 | 0.11123914 |
| 0.442553202 | 0.331288216 | 0.11126499 |
| 0.399792148 | 0.288497756 | 0.11129439 |
| 0.764965997 | 0.653639435 | 0.11132656 |
| 0.821194908 | 0.709798004 | 0.1113969  |
| 0.84945631  | 0.73799764  | 0.11145867 |

|             |             |            |
|-------------|-------------|------------|
| 0.307535421 | 0.196021923 | 0.1115135  |
| 0.269655941 | 0.158059457 | 0.11159648 |
| 0.727063842 | 0.615451529 | 0.11161231 |
| 0.892394637 | 0.780757799 | 0.11163684 |
| 0.461598148 | 0.349936111 | 0.11166204 |
| 0.632275551 | 0.520608258 | 0.11166729 |
| 0.321387585 | 0.209637099 | 0.11175049 |
| 0.464863732 | 0.35309344  | 0.11177029 |
| 0.442534378 | 0.330755745 | 0.11177863 |
| 0.774528226 | 0.662690203 | 0.11183802 |
| 0.640546683 | 0.528652305 | 0.11189438 |
| 0.791826832 | 0.679926804 | 0.11190003 |
| 0.75199307  | 0.640029498 | 0.11196357 |
| 0.714097383 | 0.602095889 | 0.11200149 |
| 0.489163063 | 0.377133311 | 0.11202975 |
| 0.779112268 | 0.666796595 | 0.11231567 |
| 0.577661336 | 0.465312565 | 0.11234877 |
| 0.667944039 | 0.555564674 | 0.11237937 |
| 0.559778051 | 0.447341464 | 0.11243659 |
| 0.324880665 | 0.212236579 | 0.11264409 |
| 0.653149551 | 0.540486285 | 0.11266327 |
| 0.694428395 | 0.581684749 | 0.11274365 |
| 0.698604906 | 0.585855718 | 0.11274919 |
| 0.455227671 | 0.342376721 | 0.11285095 |
| 0.721119872 | 0.608245872 | 0.112874   |
| 0.266942563 | 0.154032745 | 0.11290982 |
| 0.58955037  | 0.476589949 | 0.11296042 |
| 0.311716208 | 0.198650441 | 0.11306577 |
| 0.729884525 | 0.616799242 | 0.11308528 |
| 0.597476261 | 0.484368569 | 0.11310769 |
| 0.848186699 | 0.735041352 | 0.11314535 |
| 0.489814713 | 0.376580966 | 0.11323375 |
| 0.818822618 | 0.705574404 | 0.11324821 |
| 0.458743424 | 0.345469433 | 0.11327399 |
| 0.590141425 | 0.476844564 | 0.11329686 |
| 0.313680199 | 0.20034878  | 0.11333142 |
| 0.464778028 | 0.351436382 | 0.11334165 |
| 0.604931872 | 0.491506714 | 0.11342516 |
| 0.610944635 | 0.497437511 | 0.11350712 |
| 0.19469656  | 0.081142185 | 0.11355437 |
| 0.683421236 | 0.569627507 | 0.11379373 |
| 0.844490215 | 0.730684161 | 0.11380605 |
| 0.360647471 | 0.246623032 | 0.11402444 |
| 0.764630242 | 0.650562212 | 0.11406803 |
| 0.628103235 | 0.513999626 | 0.11410361 |
| 0.742085046 | 0.627857078 | 0.11422797 |



|             |             |            |
|-------------|-------------|------------|
| 0.843695986 | 0.729358617 | 0.11433737 |
| 0.685861892 | 0.571488387 | 0.11437351 |
| 0.662525911 | 0.548113045 | 0.11441287 |
| 0.606630372 | 0.49214411  | 0.11448626 |
| 0.203953716 | 0.089451273 | 0.11450244 |
| 0.565303124 | 0.450766923 | 0.1145362  |
| 0.290522281 | 0.175881435 | 0.11464085 |
| 0.279846781 | 0.165178207 | 0.11466857 |
| 0.901515742 | 0.786718247 | 0.11479749 |
| 0.889966958 | 0.774973052 | 0.11499391 |
| 0.754917931 | 0.639898483 | 0.11501945 |
| 0.86570675  | 0.750683006 | 0.11502374 |
| 0.326145356 | 0.211111911 | 0.11503345 |
| 0.714298864 | 0.599179229 | 0.11511964 |
| 0.758511127 | 0.643292415 | 0.11521871 |
| 0.688554792 | 0.573304274 | 0.11525052 |
| 0.871262757 | 0.755867525 | 0.11539523 |
| 0.364628858 | 0.249195397 | 0.11543346 |
| 0.718163798 | 0.602637092 | 0.11552671 |
| 0.88817134  | 0.772577977 | 0.11559336 |
| 0.62909418  | 0.51344962  | 0.11564456 |
| 0.750093463 | 0.634436327 | 0.11565714 |
| 0.337108427 | 0.221449554 | 0.11565887 |
| 0.510942459 | 0.395275469 | 0.11566699 |
| 0.598305705 | 0.482326325 | 0.11597938 |
| 0.524967273 | 0.40894982  | 0.11601745 |
| 0.65709775  | 0.541023923 | 0.11607383 |
| 0.569676276 | 0.45357008  | 0.1161062  |
| 0.638284739 | 0.522147608 | 0.11613713 |
| 0.553899827 | 0.437732794 | 0.11616703 |
| 0.390482345 | 0.27418664  | 0.11629571 |
| 0.85434709  | 0.738044282 | 0.11630281 |
| 0.734869203 | 0.618547726 | 0.11632148 |
| 0.292376774 | 0.17604829  | 0.11632849 |
| 0.302767944 | 0.186430136 | 0.11633781 |
| 0.469662965 | 0.353113392 | 0.11654957 |
| 0.8704997   | 0.753921356 | 0.11657834 |
| 0.838671229 | 0.722047489 | 0.11662374 |
| 0.557363371 | 0.440570703 | 0.11679267 |
| 0.807171844 | 0.690226999 | 0.11694485 |
| 0.87244486  | 0.755466706 | 0.11697815 |
| 0.848124087 | 0.731133752 | 0.11699034 |
| 0.719928533 | 0.602860795 | 0.11706774 |
| 0.680498675 | 0.563371955 | 0.11712672 |
| 0.432576168 | 0.31544516  | 0.11713101 |
| 0.712219846 | 0.594995212 | 0.11722464 |

|             |             |            |
|-------------|-------------|------------|
| 0.842843057 | 0.725588146 | 0.11725491 |
| 0.265369108 | 0.148060657 | 0.11730845 |
| 0.636773841 | 0.519384461 | 0.11738938 |
| 0.57158831  | 0.454171158 | 0.11741715 |
| 0.558780785 | 0.441354063 | 0.11742672 |
| 0.262115837 | 0.144638429 | 0.11747741 |
| 0.669151426 | 0.551643697 | 0.11750773 |
| 0.888155692 | 0.77064475  | 0.11751094 |
| 0.721943532 | 0.604426803 | 0.11751673 |
| 0.321514168 | 0.203963335 | 0.11755083 |
| 0.733738886 | 0.616165158 | 0.11757373 |
| 0.429822364 | 0.312242067 | 0.1175803  |
| 0.738694846 | 0.621075119 | 0.11761973 |
| 0.36579122  | 0.248130312 | 0.11766091 |
| 0.41700637  | 0.299318542 | 0.11768783 |
| 0.353065687 | 0.235357063 | 0.11770862 |
| 0.461557433 | 0.343807705 | 0.11774973 |
| 0.716050333 | 0.598290183 | 0.11776015 |
| 0.357520746 | 0.239755825 | 0.11776492 |
| 0.327998472 | 0.210203656 | 0.11779482 |
| 0.600380903 | 0.482469249 | 0.11791165 |
| 0.818487911 | 0.700518578 | 0.11796933 |
| 0.83583134  | 0.717805481 | 0.11802586 |
| 0.742631272 | 0.624530124 | 0.11810115 |
| 0.647502248 | 0.529397436 | 0.11810481 |
| 0.3620784   | 0.243932488 | 0.11814591 |
| 0.725381556 | 0.607228297 | 0.11815326 |
| 0.812142241 | 0.693823616 | 0.11831863 |
| 0.731433201 | 0.613090831 | 0.11834237 |
| 0.667233676 | 0.548602745 | 0.11863093 |
| 0.46482424  | 0.346135349 | 0.11868889 |
| 0.759384956 | 0.640677438 | 0.11870752 |
| 0.604644506 | 0.485924786 | 0.11871972 |
| 0.676457381 | 0.557575126 | 0.11888226 |
| 0.477928724 | 0.359024446 | 0.11890428 |
| 0.831551768 | 0.712537463 | 0.11901431 |
| 0.698218239 | 0.579132531 | 0.11908571 |
| 0.662678393 | 0.543511803 | 0.11916659 |
| 0.374458129 | 0.255266281 | 0.11919185 |
| 0.363732116 | 0.244526802 | 0.11920531 |
| 0.639209262 | 0.519890607 | 0.11931866 |
| 0.48936768  | 0.37004696  | 0.11932072 |
| 0.771857904 | 0.652472227 | 0.11938568 |
| 0.794851934 | 0.675125232 | 0.1197267  |
| 0.681462742 | 0.561696325 | 0.11976642 |
| 0.372333869 | 0.252359743 | 0.11997413 |

|             |             |            |
|-------------|-------------|------------|
| 0.782364631 | 0.662290342 | 0.12007429 |
| 0.799537362 | 0.679462035 | 0.12007533 |
| 0.90519229  | 0.785106131 | 0.12008616 |
| 0.647828209 | 0.527714963 | 0.12011325 |
| 0.499134161 | 0.379006473 | 0.12012769 |
| 0.844601828 | 0.724323875 | 0.12027795 |
| 0.854954813 | 0.734501882 | 0.12045293 |
| 0.767745593 | 0.647161072 | 0.12058452 |
| 0.644287657 | 0.523702198 | 0.12058546 |
| 0.709947868 | 0.58931419  | 0.12063368 |
| 0.564135946 | 0.443398105 | 0.12073784 |
| 0.714344472 | 0.59357548  | 0.12076899 |
| 0.467551376 | 0.346619925 | 0.12093145 |
| 0.853382788 | 0.732360363 | 0.12102243 |
| 0.437579762 | 0.316516636 | 0.12106313 |
| 0.377780705 | 0.25665029  | 0.12113042 |
| 0.331910881 | 0.210758868 | 0.12115201 |
| 0.7021694   | 0.58095809  | 0.12121131 |
| 0.53448267  | 0.413270803 | 0.12121187 |
| 0.609216969 | 0.487953433 | 0.12126354 |
| 0.532387932 | 0.411111236 | 0.1212767  |
| 0.563101454 | 0.441820147 | 0.12128131 |
| 0.831304466 | 0.709986527 | 0.12131794 |
| 0.675670172 | 0.554342869 | 0.1213273  |
| 0.566457249 | 0.445126946 | 0.1213303  |
| 0.749056963 | 0.62762304  | 0.12143392 |
| 0.677481861 | 0.556026056 | 0.12145581 |
| 0.883604976 | 0.762141248 | 0.12146373 |
| 0.60038407  | 0.478882838 | 0.12150123 |
| 0.568763903 | 0.447223126 | 0.12154078 |
| 0.338773857 | 0.217224369 | 0.12154949 |
| 0.635795348 | 0.514237866 | 0.12155748 |
| 0.638271625 | 0.51668809  | 0.12158354 |
| 0.880592696 | 0.758900274 | 0.12169242 |
| 0.715450526 | 0.593707243 | 0.12174328 |
| 0.593174339 | 0.471301016 | 0.12187332 |
| 0.464272201 | 0.342283672 | 0.12198853 |
| 0.90408328  | 0.782068501 | 0.12201478 |
| 0.661664693 | 0.539518219 | 0.12214647 |
| 0.514438977 | 0.392276507 | 0.12216247 |
| 0.846601044 | 0.72424271  | 0.12235834 |
| 0.435025506 | 0.312613553 | 0.12241195 |
| 0.876576808 | 0.754131986 | 0.12244482 |
| 0.813664322 | 0.691176088 | 0.12248823 |
| 0.575599969 | 0.453089282 | 0.12251069 |
| 0.770988419 | 0.648395473 | 0.12259295 |

|             |             |            |
|-------------|-------------|------------|
| 0.77011277  | 0.647491857 | 0.12262091 |
| 0.50849596  | 0.385866336 | 0.12262962 |
| 0.52213093  | 0.399473493 | 0.12265744 |
| 0.365759101 | 0.243090078 | 0.12266902 |
| 0.346331702 | 0.223528001 | 0.1228037  |
| 0.510569321 | 0.387675959 | 0.12289336 |
| 0.289144309 | 0.166199504 | 0.12294481 |
| 0.491210199 | 0.368232732 | 0.12297747 |
| 0.403822254 | 0.280714858 | 0.1231074  |
| 0.475163653 | 0.351955016 | 0.12320864 |
| 0.800937771 | 0.677611114 | 0.12332666 |
| 0.571444158 | 0.448106741 | 0.12333742 |
| 0.296293804 | 0.17291421  | 0.12337959 |
| 0.819683236 | 0.696294472 | 0.12338876 |
| 0.784862331 | 0.661336793 | 0.12352554 |
| 0.868428202 | 0.744866649 | 0.12356155 |
| 0.807247042 | 0.683585192 | 0.12366185 |
| 0.381271832 | 0.25755487  | 0.12371696 |
| 0.27652265  | 0.152787099 | 0.12373555 |
| 0.317212671 | 0.193449891 | 0.12376278 |
| 0.470754004 | 0.346660622 | 0.12409338 |
| 0.847842902 | 0.723747665 | 0.12409524 |
| 0.625694365 | 0.501424086 | 0.12427028 |
| 0.786549005 | 0.662270085 | 0.12427892 |
| 0.838697287 | 0.714247558 | 0.12444973 |
| 0.781174342 | 0.656563739 | 0.1246106  |
| 0.486313528 | 0.361694701 | 0.12461883 |
| 0.715852954 | 0.591145247 | 0.12470771 |
| 0.470789004 | 0.345999913 | 0.12478909 |
| 0.383783254 | 0.258873494 | 0.12490976 |
| 0.882045872 | 0.756999774 | 0.1250461  |
| 0.875335311 | 0.750283161 | 0.12505215 |
| 0.882978721 | 0.757915547 | 0.12506317 |
| 0.686844233 | 0.561635674 | 0.12520856 |
| 0.287412213 | 0.162181646 | 0.12523057 |
| 0.631948492 | 0.506682523 | 0.12526597 |
| 0.806338941 | 0.680920226 | 0.12541872 |
| 0.619979525 | 0.494524909 | 0.12545462 |
| 0.723391484 | 0.597850745 | 0.12554074 |
| 0.61224145  | 0.486661822 | 0.12557963 |
| 0.336123633 | 0.210507042 | 0.12561659 |
| 0.442889191 | 0.317202559 | 0.12568663 |
| 0.322542019 | 0.196791523 | 0.1257505  |
| 0.571603318 | 0.445818951 | 0.12578437 |
| 0.495510712 | 0.369369555 | 0.12614116 |
| 0.703472747 | 0.577237116 | 0.12623563 |

|             |             |            |
|-------------|-------------|------------|
| 0.750735747 | 0.624430558 | 0.12630519 |
| 0.856998947 | 0.730614681 | 0.12638427 |
| 0.61237597  | 0.485924795 | 0.12645118 |
| 0.705983382 | 0.579494538 | 0.12648884 |
| 0.77129866  | 0.644674022 | 0.12662464 |
| 0.698506197 | 0.571869817 | 0.12663638 |
| 0.623846596 | 0.497201361 | 0.12664524 |
| 0.697076286 | 0.570266172 | 0.12681011 |
| 0.374388562 | 0.247409324 | 0.12697924 |
| 0.688378951 | 0.561388918 | 0.12699003 |
| 0.360079605 | 0.233082576 | 0.12699703 |
| 0.297592267 | 0.170482724 | 0.12710954 |
| 0.705208244 | 0.578022138 | 0.12718611 |
| 0.400570575 | 0.273361958 | 0.12720862 |
| 0.618571488 | 0.491359027 | 0.12721246 |
| 0.509780497 | 0.382565207 | 0.12721529 |
| 0.835738416 | 0.708354262 | 0.12738415 |
| 0.248261043 | 0.120798488 | 0.12746256 |
| 0.719432211 | 0.591947234 | 0.12748498 |
| 0.740218284 | 0.612545338 | 0.12767295 |
| 0.352418063 | 0.224649566 | 0.1277685  |
| 0.594638129 | 0.466849236 | 0.12778889 |
| 0.648653859 | 0.520535994 | 0.12811787 |
| 0.608765923 | 0.48062504  | 0.12814088 |
| 0.29050781  | 0.162191308 | 0.1283165  |
| 0.747682668 | 0.619343641 | 0.12833903 |
| 0.641356746 | 0.512978619 | 0.12837813 |
| 0.765416735 | 0.637003619 | 0.12841312 |
| 0.788560187 | 0.66013481  | 0.12842538 |
| 0.559091194 | 0.430650985 | 0.12844021 |
| 0.802035484 | 0.673595079 | 0.12844041 |
| 0.790675886 | 0.662179027 | 0.12849686 |
| 0.526248563 | 0.397586504 | 0.12866206 |
| 0.546711449 | 0.417903893 | 0.12880756 |
| 0.343341477 | 0.214528993 | 0.12881248 |
| 0.701708465 | 0.572830783 | 0.12887768 |
| 0.554571455 | 0.425577958 | 0.1289935  |
| 0.631154428 | 0.502071563 | 0.12908287 |
| 0.431799763 | 0.302629711 | 0.12917005 |
| 0.876391967 | 0.746966198 | 0.12942577 |
| 0.774586033 | 0.64508902  | 0.12949701 |
| 0.399777995 | 0.270089448 | 0.12968855 |
| 0.443833041 | 0.31411195  | 0.12972109 |
| 0.564651453 | 0.434794659 | 0.12985679 |
| 0.481593115 | 0.351606169 | 0.12998695 |
| 0.79310411  | 0.662915245 | 0.13018887 |

|             |             |            |
|-------------|-------------|------------|
| 0.643338664 | 0.513123109 | 0.13021556 |
| 0.904050872 | 0.773764873 | 0.130286   |
| 0.670824978 | 0.540367014 | 0.13045796 |
| 0.33806129  | 0.207361387 | 0.1306999  |
| 0.582341654 | 0.451554099 | 0.13078756 |
| 0.730119042 | 0.599316856 | 0.13080219 |
| 0.519770402 | 0.388864526 | 0.13090588 |
| 0.655808022 | 0.524868076 | 0.13093995 |
| 0.792038791 | 0.661094503 | 0.13094429 |
| 0.499838667 | 0.368894292 | 0.13094438 |
| 0.629224983 | 0.498250603 | 0.13097438 |
| 0.565390754 | 0.434394994 | 0.13099576 |
| 0.78664139  | 0.655427417 | 0.13121397 |
| 0.752913273 | 0.621614783 | 0.13129849 |
| 0.528244829 | 0.396877288 | 0.13136754 |
| 0.555986938 | 0.42460221  | 0.13138473 |
| 0.843904656 | 0.712499044 | 0.13140561 |
| 0.847444387 | 0.715960644 | 0.13148374 |
| 0.630133726 | 0.498585627 | 0.1315481  |
| 0.804772479 | 0.673223527 | 0.13154895 |
| 0.771352219 | 0.639765928 | 0.13158629 |
| 0.480346605 | 0.34873098  | 0.13161563 |
| 0.894033976 | 0.762399378 | 0.1316346  |
| 0.363547251 | 0.231901354 | 0.1316459  |
| 0.550735197 | 0.419086725 | 0.13164847 |
| 0.716004788 | 0.58412612  | 0.13187867 |
| 0.352295362 | 0.220318273 | 0.13197709 |
| 0.683238272 | 0.551244696 | 0.13199358 |
| 0.877869698 | 0.745768951 | 0.13210075 |
| 0.646432185 | 0.514039479 | 0.13239271 |
| 0.559218142 | 0.426781732 | 0.13243641 |
| 0.899631688 | 0.767128961 | 0.13250273 |
| 0.753853486 | 0.621338679 | 0.13251481 |
| 0.569843409 | 0.436964605 | 0.13287881 |
| 0.732474676 | 0.599585236 | 0.13288944 |
| 0.408258787 | 0.27530321  | 0.13295558 |
| 0.67336256  | 0.540278817 | 0.13308374 |
| 0.327819496 | 0.194567252 | 0.13325224 |
| 0.601332443 | 0.468070444 | 0.133262   |
| 0.300478436 | 0.167089711 | 0.13338873 |
| 0.589997766 | 0.456589914 | 0.13340785 |
| 0.593691835 | 0.460266266 | 0.13342557 |
| 0.606095046 | 0.472664694 | 0.13343035 |
| 0.739966079 | 0.606519265 | 0.13344681 |
| 0.313910173 | 0.180459806 | 0.13345037 |
| 0.477133331 | 0.34363712  | 0.13349621 |

|             |             |            |
|-------------|-------------|------------|
| 0.859542281 | 0.725923559 | 0.13361872 |
| 0.859629722 | 0.725991543 | 0.13363818 |
| 0.446504432 | 0.312795004 | 0.13370943 |
| 0.446796368 | 0.313052883 | 0.13374349 |
| 0.492757419 | 0.358968117 | 0.1337893  |
| 0.85299351  | 0.719119234 | 0.13387428 |
| 0.794107424 | 0.660199424 | 0.133908   |
| 0.635765468 | 0.501727112 | 0.13403836 |
| 0.893518649 | 0.759115209 | 0.13440344 |
| 0.601575629 | 0.466965816 | 0.13460981 |
| 0.761352694 | 0.626559914 | 0.13479278 |
| 0.638253069 | 0.503448788 | 0.13480428 |
| 0.705611485 | 0.570745777 | 0.13486571 |
| 0.450810028 | 0.315554016 | 0.13525601 |
| 0.501096283 | 0.365826284 | 0.13527    |
| 0.750837347 | 0.615464584 | 0.13537276 |
| 0.819487781 | 0.68408414  | 0.13540364 |
| 0.87581546  | 0.740123198 | 0.13569226 |
| 0.885633829 | 0.749768427 | 0.1358654  |
| 0.781698769 | 0.645790486 | 0.13590828 |
| 0.564258696 | 0.428298375 | 0.13596032 |
| 0.572696596 | 0.436507268 | 0.13618933 |
| 0.856383107 | 0.720145259 | 0.13623785 |
| 0.764017328 | 0.627586135 | 0.13643119 |
| 0.718140934 | 0.581638571 | 0.13650236 |
| 0.799068935 | 0.66254573  | 0.13652321 |
| 0.31188829  | 0.175359964 | 0.13652833 |
| 0.652982936 | 0.516403347 | 0.13657959 |
| 0.78925974  | 0.652648037 | 0.1366117  |
| 0.773874895 | 0.63719277  | 0.13668213 |
| 0.839736394 | 0.702748637 | 0.13698776 |
| 0.517837251 | 0.380813597 | 0.13702365 |
| 0.301533312 | 0.164451153 | 0.13708216 |
| 0.805490879 | 0.66825281  | 0.13723807 |
| 0.424226002 | 0.286765086 | 0.13746092 |
| 0.727017383 | 0.589528184 | 0.1374892  |
| 0.834290709 | 0.696777336 | 0.13751337 |
| 0.651414491 | 0.513861954 | 0.13755254 |
| 0.839358086 | 0.701786131 | 0.13757196 |
| 0.581432603 | 0.44364045  | 0.13779215 |
| 0.388696599 | 0.25074302  | 0.13795358 |
| 0.578921675 | 0.440938072 | 0.1379836  |
| 0.719280024 | 0.581256473 | 0.13802355 |
| 0.328407954 | 0.190130169 | 0.13827778 |
| 0.782872013 | 0.644580487 | 0.13829153 |
| 0.799080317 | 0.660641776 | 0.13843854 |

|             |             |            |
|-------------|-------------|------------|
| 0.604799041 | 0.466349177 | 0.13844986 |
| 0.410003624 | 0.271515416 | 0.13848821 |
| 0.309734221 | 0.17123346  | 0.13850076 |
| 0.441018767 | 0.302482692 | 0.13853608 |
| 0.856601467 | 0.718030614 | 0.13857085 |
| 0.632385872 | 0.493702145 | 0.13868373 |
| 0.634436756 | 0.495453508 | 0.13898325 |
| 0.74645631  | 0.607422733 | 0.13903358 |
| 0.568226574 | 0.429060446 | 0.13916613 |
| 0.901975638 | 0.762716766 | 0.13925887 |
| 0.511420054 | 0.371989429 | 0.13943063 |
| 0.409579219 | 0.26996504  | 0.13961418 |
| 0.547935353 | 0.40831074  | 0.13962461 |
| 0.821142389 | 0.681267486 | 0.1398749  |
| 0.50273778  | 0.362720217 | 0.14001756 |
| 0.570470565 | 0.430421549 | 0.14004902 |
| 0.581758643 | 0.441649495 | 0.14010915 |
| 0.626485612 | 0.486317876 | 0.14016774 |
| 0.517873854 | 0.377546358 | 0.1403275  |
| 0.719582666 | 0.578990086 | 0.14059258 |
| 0.498113203 | 0.357507693 | 0.14060551 |
| 0.51736871  | 0.376542099 | 0.14082661 |
| 0.557921093 | 0.41702696  | 0.14089413 |
| 0.451473285 | 0.310558988 | 0.1409143  |
| 0.521822891 | 0.380856125 | 0.14096677 |
| 0.759123321 | 0.618024082 | 0.14109924 |
| 0.687765505 | 0.546421619 | 0.14134389 |
| 0.507769727 | 0.366368118 | 0.14140161 |
| 0.375056109 | 0.233644008 | 0.1414121  |
| 0.874184048 | 0.732710369 | 0.14147368 |
| 0.909242581 | 0.767622601 | 0.14161998 |
| 0.511306321 | 0.369413876 | 0.14189245 |
| 0.441139691 | 0.299215416 | 0.14192428 |
| 0.425950816 | 0.283936659 | 0.14201416 |
| 0.584016947 | 0.441976951 | 0.14204    |
| 0.529066752 | 0.386998798 | 0.14206795 |
| 0.380957784 | 0.238664887 | 0.1422929  |
| 0.670500491 | 0.528082668 | 0.14241782 |
| 0.356915188 | 0.214454012 | 0.14246118 |
| 0.676472459 | 0.533991076 | 0.14248138 |
| 0.598103333 | 0.455595945 | 0.14250739 |
| 0.529730142 | 0.387162518 | 0.14256762 |
| 0.375004119 | 0.232308124 | 0.142696   |
| 0.760626832 | 0.617911923 | 0.14271491 |
| 0.807147546 | 0.664334419 | 0.14281313 |
| 0.564921326 | 0.421905794 | 0.14301553 |



|             |             |            |
|-------------|-------------|------------|
| 0.724368177 | 0.581340772 | 0.14302741 |
| 0.799682814 | 0.656449273 | 0.14323354 |
| 0.781165346 | 0.63783219  | 0.14333316 |
| 0.532371765 | 0.389013178 | 0.14335859 |
| 0.423914562 | 0.280247877 | 0.14366668 |
| 0.809883006 | 0.666186012 | 0.14369699 |
| 0.617495367 | 0.473751904 | 0.14374346 |
| 0.877722547 | 0.733918751 | 0.1438038  |
| 0.315780338 | 0.171919313 | 0.14386102 |
| 0.551880734 | 0.407919389 | 0.14396135 |
| 0.746085442 | 0.601801844 | 0.1442836  |
| 0.79042806  | 0.645975848 | 0.14445221 |
| 0.740940776 | 0.596429517 | 0.14451126 |
| 0.86430541  | 0.719456211 | 0.1448492  |
| 0.716349429 | 0.571388256 | 0.14496117 |
| 0.786917588 | 0.641901826 | 0.14501576 |
| 0.434740682 | 0.289703696 | 0.14503699 |
| 0.687754991 | 0.542541547 | 0.14521344 |
| 0.691599557 | 0.546323778 | 0.14527578 |
| 0.394518327 | 0.249026677 | 0.14549165 |
| 0.482727578 | 0.337077096 | 0.14565048 |
| 0.862022728 | 0.716285444 | 0.14573729 |
| 0.446175933 | 0.300348166 | 0.14582777 |
| 0.720919083 | 0.575066935 | 0.14585215 |
| 0.654215957 | 0.508331015 | 0.14588494 |
| 0.7317607   | 0.585794567 | 0.14596613 |
| 0.422019612 | 0.276040002 | 0.14597961 |
| 0.721861455 | 0.575872146 | 0.14598931 |
| 0.645070614 | 0.499001844 | 0.14606877 |
| 0.615220732 | 0.468921795 | 0.14629894 |
| 0.897440157 | 0.751062584 | 0.14637757 |
| 0.520572661 | 0.374183319 | 0.14638934 |
| 0.836646863 | 0.690170982 | 0.14647588 |
| 0.483710504 | 0.337035129 | 0.14667537 |
| 0.799810089 | 0.65280596  | 0.14700413 |
| 0.602586144 | 0.455535217 | 0.14705093 |
| 0.758144093 | 0.611063292 | 0.1470808  |
| 0.320358545 | 0.173045182 | 0.14731336 |
| 0.583709432 | 0.436349899 | 0.14735953 |
| 0.319919493 | 0.172297641 | 0.14762185 |
| 0.856222334 | 0.708413949 | 0.14780839 |
| 0.640219749 | 0.492242633 | 0.14797712 |
| 0.361127663 | 0.213094911 | 0.14803275 |
| 0.418649779 | 0.270586009 | 0.14806377 |
| 0.837945505 | 0.689780627 | 0.14816488 |
| 0.442173371 | 0.293977712 | 0.14819566 |

|             |             |            |
|-------------|-------------|------------|
| 0.797929928 | 0.649734211 | 0.14819572 |
| 0.728328598 | 0.580122334 | 0.14820626 |
| 0.4777884   | 0.329379926 | 0.14840848 |
| 0.515489984 | 0.366933387 | 0.14855566 |
| 0.543144162 | 0.394587078 | 0.14855708 |
| 0.54178726  | 0.393130065 | 0.1486572  |
| 0.362610117 | 0.213908835 | 0.14870128 |
| 0.744279636 | 0.59515371  | 0.14912593 |
| 0.563091676 | 0.413861986 | 0.14922969 |
| 0.77675759  | 0.627332109 | 0.14942548 |
| 0.831280138 | 0.681751555 | 0.14952858 |
| 0.603713186 | 0.454150638 | 0.14956255 |
| 0.478825567 | 0.329174055 | 0.14965151 |
| 0.633178018 | 0.483481321 | 0.1496967  |
| 0.865089143 | 0.715202298 | 0.14988685 |
| 0.558331979 | 0.408425908 | 0.14990607 |
| 0.488118248 | 0.33810315  | 0.1500151  |
| 0.479854037 | 0.329832628 | 0.15002141 |
| 0.723662335 | 0.573256053 | 0.15040628 |
| 0.378768654 | 0.228350676 | 0.15041798 |
| 0.596606338 | 0.445962746 | 0.15064359 |
| 0.410824244 | 0.260072122 | 0.15075212 |
| 0.82107405  | 0.670055902 | 0.15101815 |
| 0.513942043 | 0.362859122 | 0.15108292 |
| 0.447291612 | 0.296192026 | 0.15109959 |
| 0.649969295 | 0.498845385 | 0.15112391 |
| 0.754083435 | 0.602851056 | 0.15123238 |
| 0.869854565 | 0.718463739 | 0.15139083 |
| 0.663518634 | 0.511996873 | 0.15152176 |
| 0.370268973 | 0.21869498  | 0.15157399 |
| 0.517155489 | 0.365321551 | 0.15183394 |
| 0.908160703 | 0.756226909 | 0.15193379 |
| 0.514783855 | 0.362825993 | 0.15195786 |
| 0.608745253 | 0.456754383 | 0.15199087 |
| 0.755920451 | 0.603539984 | 0.15238047 |
| 0.384365341 | 0.231818704 | 0.15254664 |
| 0.800912018 | 0.64785282  | 0.1530592  |
| 0.426157159 | 0.27302142  | 0.15313574 |
| 0.682565364 | 0.528862419 | 0.15370295 |
| 0.546438873 | 0.392666827 | 0.15377205 |
| 0.823305444 | 0.669517224 | 0.15378822 |
| 0.682581529 | 0.528746804 | 0.15383473 |
| 0.660213991 | 0.506370177 | 0.15384381 |
| 0.787967396 | 0.633751518 | 0.15421588 |
| 0.838930847 | 0.684711252 | 0.1542196  |
| 0.384788703 | 0.230494071 | 0.15429463 |

|             |             |            |
|-------------|-------------|------------|
| 0.752258355 | 0.597780316 | 0.15447804 |
| 0.574774476 | 0.420059673 | 0.1547148  |
| 0.500663355 | 0.345792577 | 0.15487078 |
| 0.405512253 | 0.250551985 | 0.15496027 |
| 0.588900115 | 0.433893622 | 0.15500649 |
| 0.532511308 | 0.377394978 | 0.15511633 |
| 0.46017582  | 0.30466724  | 0.15550858 |
| 0.698307041 | 0.542304    | 0.15600304 |
| 0.701912842 | 0.54547948  | 0.15643336 |
| 0.354097695 | 0.197510225 | 0.15658747 |
| 0.461681733 | 0.30497595  | 0.15670578 |
| 0.732049801 | 0.575338648 | 0.15671115 |
| 0.715673907 | 0.55894563  | 0.15672828 |
| 0.487378619 | 0.330647985 | 0.15673063 |
| 0.817558716 | 0.660446866 | 0.15711185 |
| 0.789113686 | 0.631967779 | 0.15714591 |
| 0.544636282 | 0.387380569 | 0.15725571 |
| 0.407047755 | 0.249643985 | 0.15740377 |
| 0.427931745 | 0.270495815 | 0.15743593 |
| 0.862340343 | 0.704709977 | 0.15763037 |
| 0.571501146 | 0.413854552 | 0.15764659 |
| 0.4908011   | 0.33314642  | 0.15765468 |
| 0.665247221 | 0.507562008 | 0.15768521 |
| 0.710103698 | 0.552350509 | 0.15775319 |
| 0.588642666 | 0.430827276 | 0.15781539 |
| 0.783537299 | 0.625393104 | 0.1581442  |
| 0.688262263 | 0.530020963 | 0.1582413  |
| 0.369200631 | 0.210924021 | 0.15827661 |
| 0.444309251 | 0.285832768 | 0.15847648 |
| 0.573006788 | 0.414524808 | 0.15848198 |
| 0.878826904 | 0.719983148 | 0.15884376 |
| 0.814146326 | 0.655197417 | 0.15894891 |
| 0.643147154 | 0.484119908 | 0.15902725 |
| 0.405917694 | 0.24680841  | 0.15910928 |
| 0.725981632 | 0.566714934 | 0.1592667  |
| 0.493985859 | 0.334620078 | 0.15936578 |
| 0.681887208 | 0.522444041 | 0.15944317 |
| 0.306764994 | 0.147217006 | 0.15954799 |
| 0.573809537 | 0.413870124 | 0.15993941 |
| 0.657756882 | 0.497807248 | 0.15994963 |
| 0.652329853 | 0.492262904 | 0.16006695 |
| 0.724973587 | 0.564740969 | 0.16023262 |
| 0.906620941 | 0.746379016 | 0.16024193 |
| 0.846599939 | 0.686178673 | 0.16042127 |
| 0.822394682 | 0.661949123 | 0.16044556 |
| 0.524830707 | 0.364184946 | 0.16064576 |

|             |             |            |
|-------------|-------------|------------|
| 0.565703974 | 0.404981324 | 0.16072265 |
| 0.69019278  | 0.529455002 | 0.16073778 |
| 0.604525765 | 0.443717257 | 0.16080851 |
| 0.790562806 | 0.629672859 | 0.16088995 |
| 0.401714942 | 0.240670699 | 0.16104424 |
| 0.734563934 | 0.573192024 | 0.16137191 |
| 0.351081669 | 0.189665267 | 0.1614164  |
| 0.382706356 | 0.221145252 | 0.1615611  |
| 0.855134671 | 0.693259527 | 0.16187514 |
| 0.649313086 | 0.486672344 | 0.16264074 |
| 0.682637975 | 0.519632142 | 0.16300583 |
| 0.495610101 | 0.332498351 | 0.16311175 |
| 0.747536932 | 0.584406286 | 0.16313065 |
| 0.61436858  | 0.451222248 | 0.16314633 |
| 0.732361523 | 0.569106259 | 0.16325527 |
| 0.309405478 | 0.145996898 | 0.16340858 |
| 0.621851364 | 0.458246966 | 0.1636044  |
| 0.766412513 | 0.602631468 | 0.16378105 |
| 0.752605515 | 0.588602465 | 0.16400305 |
| 0.681115321 | 0.516907554 | 0.16420777 |
| 0.563777473 | 0.399529662 | 0.16424781 |
| 0.501873272 | 0.337495315 | 0.16437796 |
| 0.744295242 | 0.579610432 | 0.16468481 |
| 0.788464043 | 0.623295782 | 0.16516826 |
| 0.41608399  | 0.250722127 | 0.16536186 |
| 0.652096625 | 0.486328384 | 0.16576824 |
| 0.408743587 | 0.242665588 | 0.166078   |
| 0.642154118 | 0.476045193 | 0.16610893 |
| 0.378066793 | 0.211889538 | 0.16617726 |
| 0.394423412 | 0.228235262 | 0.16618815 |
| 0.351205228 | 0.184812769 | 0.16639246 |
| 0.755347873 | 0.588922818 | 0.16642506 |
| 0.553051748 | 0.386240725 | 0.16681102 |
| 0.660873745 | 0.493736484 | 0.16713726 |
| 0.696503376 | 0.529209033 | 0.16729434 |
| 0.793773811 | 0.62647616  | 0.16729765 |
| 0.606875962 | 0.439529459 | 0.1673465  |
| 0.625419412 | 0.457748073 | 0.16767134 |
| 0.697242827 | 0.529095777 | 0.16814705 |
| 0.579561373 | 0.411248553 | 0.16831282 |
| 0.483678911 | 0.315334873 | 0.16834404 |
| 0.85844594  | 0.690074582 | 0.16837136 |
| 0.69501753  | 0.526007084 | 0.16901045 |
| 0.723365168 | 0.554291371 | 0.1690738  |
| 0.492881246 | 0.323256432 | 0.16962482 |
| 0.328448843 | 0.158616359 | 0.16983248 |

|             |             |            |
|-------------|-------------|------------|
| 0.810262336 | 0.640425647 | 0.16983669 |
| 0.775471572 | 0.605506519 | 0.16996505 |
| 0.500882362 | 0.330640721 | 0.17024164 |
| 0.743958842 | 0.573568076 | 0.17039077 |
| 0.767582494 | 0.596621578 | 0.17096092 |
| 0.564650609 | 0.393567613 | 0.171083   |
| 0.66570507  | 0.49434722  | 0.17135785 |
| 0.681079522 | 0.509557136 | 0.17152239 |
| 0.521984741 | 0.350263701 | 0.17172104 |
| 0.501965804 | 0.329914333 | 0.17205147 |
| 0.547085531 | 0.374698584 | 0.17238695 |
| 0.450435532 | 0.277508444 | 0.17292709 |
| 0.771976357 | 0.598873058 | 0.1731033  |
| 0.804175168 | 0.630981824 | 0.17319334 |
| 0.516347315 | 0.342910171 | 0.17343715 |
| 0.593482523 | 0.419491844 | 0.17399068 |
| 0.346458303 | 0.171954183 | 0.17450412 |
| 0.524246487 | 0.349396128 | 0.17485036 |
| 0.726040474 | 0.550868176 | 0.1751723  |
| 0.521605882 | 0.346257287 | 0.1753486  |
| 0.677048731 | 0.501482046 | 0.17556669 |
| 0.445503614 | 0.269598572 | 0.17590504 |
| 0.663661903 | 0.48754633  | 0.17611557 |
| 0.465554035 | 0.289173077 | 0.17638096 |
| 0.480038941 | 0.303537111 | 0.17650183 |
| 0.760890174 | 0.584142587 | 0.17674759 |
| 0.551670956 | 0.374633427 | 0.17703753 |
| 0.385933061 | 0.208872446 | 0.17706062 |
| 0.491605894 | 0.31440726  | 0.17719863 |
| 0.785002614 | 0.607717622 | 0.17728499 |
| 0.529360232 | 0.351979229 | 0.177381   |
| 0.634336518 | 0.456907854 | 0.17742866 |
| 0.538858827 | 0.361268231 | 0.1775906  |
| 0.626703686 | 0.449083122 | 0.17762056 |
| 0.607799474 | 0.429688341 | 0.17811113 |
| 0.643545578 | 0.464613284 | 0.17893229 |
| 0.525430402 | 0.346468552 | 0.17896185 |
| 0.710025047 | 0.53100857  | 0.17901648 |
| 0.565906992 | 0.386535744 | 0.17937125 |
| 0.564485457 | 0.384521628 | 0.17996383 |
| 0.398582151 | 0.218241534 | 0.18034062 |
| 0.643082095 | 0.462023147 | 0.18105895 |
| 0.383808468 | 0.201983517 | 0.18182495 |
| 0.576034611 | 0.394199488 | 0.18183512 |
| 0.767440404 | 0.585089809 | 0.1823506  |
| 0.688270349 | 0.505420242 | 0.18285011 |

|             |             |            |
|-------------|-------------|------------|
| 0.776599162 | 0.593536361 | 0.1830628  |
| 0.764913671 | 0.581164412 | 0.18374926 |
| 0.742745003 | 0.558843562 | 0.18390144 |
| 0.675235886 | 0.4912859   | 0.18394999 |
| 0.469773353 | 0.285384183 | 0.18438917 |
| 0.826320439 | 0.641458513 | 0.18486193 |
| 0.754417061 | 0.568258437 | 0.18615862 |
| 0.625528398 | 0.439341103 | 0.1861873  |
| 0.538962074 | 0.352740076 | 0.186222   |
| 0.532400534 | 0.346048471 | 0.18635206 |
| 0.444643292 | 0.258250824 | 0.18639247 |
| 0.637758531 | 0.451360948 | 0.18639758 |
| 0.430719334 | 0.244159691 | 0.18655964 |
| 0.624661776 | 0.437131106 | 0.18753067 |
| 0.469347522 | 0.281674718 | 0.1876728  |
| 0.637367367 | 0.449544551 | 0.18782282 |
| 0.698373471 | 0.510300664 | 0.18807281 |
| 0.696992473 | 0.508855395 | 0.18813708 |
| 0.733522125 | 0.545214495 | 0.18830763 |
| 0.623060849 | 0.434602112 | 0.18845874 |
| 0.616431084 | 0.427666528 | 0.18876456 |
| 0.71566823  | 0.526775674 | 0.18889256 |
| 0.782022326 | 0.592855637 | 0.18916669 |
| 0.823359936 | 0.63394442  | 0.18941552 |
| 0.742429252 | 0.552974656 | 0.1894546  |
| 0.806662305 | 0.617164181 | 0.18949812 |
| 0.782324067 | 0.59261254  | 0.18971153 |
| 0.569672537 | 0.379892145 | 0.18978039 |
| 0.680279566 | 0.490422307 | 0.18985726 |
| 0.655442548 | 0.465416623 | 0.19002593 |
| 0.545818854 | 0.355370806 | 0.19044805 |
| 0.583163913 | 0.392417066 | 0.19074685 |
| 0.700533554 | 0.509739705 | 0.19079385 |
| 0.823153056 | 0.631985196 | 0.19116786 |
| 0.399858434 | 0.207841317 | 0.19201712 |
| 0.55769226  | 0.364287959 | 0.1934043  |
| 0.785128939 | 0.59128189  | 0.19384705 |
| 0.702077846 | 0.508209123 | 0.19386872 |
| 0.773417274 | 0.579334938 | 0.19408234 |
| 0.503175378 | 0.309043364 | 0.19413201 |
| 0.790413157 | 0.595954149 | 0.19445901 |
| 0.408842568 | 0.213885549 | 0.19495702 |
| 0.610211691 | 0.415226973 | 0.19498472 |
| 0.426768195 | 0.231720692 | 0.1950475  |
| 0.625361804 | 0.430177303 | 0.1951845  |
| 0.592664745 | 0.397140932 | 0.19552381 |

|             |             |            |
|-------------|-------------|------------|
| 0.613160445 | 0.417454877 | 0.19570557 |
| 0.558864594 | 0.362993012 | 0.19587158 |
| 0.577513197 | 0.381637605 | 0.19587559 |
| 0.758814228 | 0.562780404 | 0.19603382 |
| 0.597690915 | 0.401540138 | 0.19615078 |
| 0.585625511 | 0.389368569 | 0.19625694 |
| 0.524334421 | 0.327381303 | 0.19695312 |
| 0.479346246 | 0.282191597 | 0.19715465 |
| 0.716385936 | 0.51909407  | 0.19729187 |
| 0.559003377 | 0.361338907 | 0.19766447 |
| 0.761966468 | 0.56416545  | 0.19780102 |
| 0.731909618 | 0.533867065 | 0.19804255 |
| 0.589998065 | 0.389913892 | 0.20008417 |
| 0.659448543 | 0.458829156 | 0.20061939 |
| 0.461098607 | 0.260311647 | 0.20078696 |
| 0.675728716 | 0.474837467 | 0.20089125 |
| 0.586938526 | 0.385644792 | 0.20129373 |
| 0.687506549 | 0.48590696  | 0.20159959 |
| 0.783826267 | 0.58220426  | 0.20162201 |
| 0.354526215 | 0.152692861 | 0.20183336 |
| 0.822524004 | 0.620097673 | 0.20242633 |
| 0.657818632 | 0.454412701 | 0.20340593 |
| 0.726080924 | 0.522474962 | 0.20360596 |
| 0.693428456 | 0.489650364 | 0.20377809 |
| 0.540737801 | 0.336005866 | 0.20473194 |
| 0.540945711 | 0.335809364 | 0.20513635 |
| 0.691148504 | 0.485112217 | 0.20603629 |
| 0.832153997 | 0.625871127 | 0.20628287 |
| 0.522903092 | 0.315452431 | 0.20745066 |
| 0.716768227 | 0.508346468 | 0.20842176 |
| 0.786198286 | 0.577775569 | 0.20842272 |
| 0.643671437 | 0.435202944 | 0.20846849 |
| 0.817561727 | 0.60890529  | 0.20865644 |
| 0.689701334 | 0.480971503 | 0.20872983 |
| 0.762069777 | 0.553324323 | 0.20874545 |
| 0.874693909 | 0.665074656 | 0.20961925 |
| 0.741566338 | 0.530703628 | 0.21086271 |
| 0.672619655 | 0.461732789 | 0.21088687 |
| 0.597785179 | 0.386683209 | 0.21110197 |
| 0.619529052 | 0.407976846 | 0.21155221 |
| 0.63434435  | 0.42272583  | 0.21161852 |
| 0.454862379 | 0.24223419  | 0.21262819 |
| 0.459852503 | 0.247159884 | 0.21269262 |
| 0.718193238 | 0.505093084 | 0.21310015 |
| 0.819977619 | 0.606877309 | 0.21310031 |
| 0.740652869 | 0.527297725 | 0.21335514 |

|             |             |            |
|-------------|-------------|------------|
| 0.467814854 | 0.253536871 | 0.21427798 |
| 0.435792593 | 0.221241768 | 0.21455083 |
| 0.522057242 | 0.306039282 | 0.21601796 |
| 0.552730204 | 0.335482819 | 0.21724739 |
| 0.606457816 | 0.38656431  | 0.21989351 |
| 0.71595566  | 0.496046629 | 0.21990903 |
| 0.535616041 | 0.315007955 | 0.22060809 |
| 0.688649471 | 0.467674354 | 0.22097512 |
| 0.80208432  | 0.580692869 | 0.22139145 |
| 0.652325491 | 0.43079989  | 0.2215256  |
| 0.679098505 | 0.45605399  | 0.22304452 |
| 0.431481052 | 0.208413925 | 0.22306713 |
| 0.840247275 | 0.616707624 | 0.22353965 |
| 0.835173648 | 0.611189091 | 0.22398456 |
| 0.648552926 | 0.423640464 | 0.22491246 |
| 0.514460177 | 0.289489278 | 0.2249709  |
| 0.51318058  | 0.286928311 | 0.22625227 |
| 0.515704625 | 0.289047645 | 0.22665698 |
| 0.713170104 | 0.485477961 | 0.22769214 |
| 0.729419582 | 0.501123967 | 0.22829561 |
| 0.838191652 | 0.608764371 | 0.22942728 |
| 0.751020006 | 0.518278648 | 0.23274136 |
| 0.717904457 | 0.482996395 | 0.23490806 |
| 0.439914656 | 0.204909512 | 0.23500514 |
| 0.49170069  | 0.256348074 | 0.23535262 |
| 0.578985116 | 0.342099978 | 0.23688514 |
| 0.740894356 | 0.500833274 | 0.24006108 |
| 0.732679592 | 0.491676533 | 0.24100306 |
| 0.702870007 | 0.458930942 | 0.24393906 |
| 0.662382566 | 0.417733224 | 0.24464934 |
| 0.687803665 | 0.442204516 | 0.24559915 |
| 0.734087401 | 0.487164692 | 0.24692271 |
| 0.800857779 | 0.543854437 | 0.25700334 |
| 0.465910498 | 0.207972293 | 0.25793821 |
| 0.543201222 | 0.268672024 | 0.2745292  |
| 0.765332235 | 0.479288104 | 0.28604413 |
| 0.666484805 | 0.360284376 | 0.30620043 |
| 0.618798622 | 0.254424051 | 0.36437457 |
