# Supplementary material for: Characterization of the Cartilage DNA Methylome in Knee and Hip Osteoarthritis
Source: PubMed Central journal article supplement — Arthritis Rheumatol. 2014 Aug 26;66(9):2450–60. doi: 10.1002/art.38713 (PMC4314681; doi:10.1002/art.38713), 2014-08-26
Supplement: art0066-2450-sd3.pdf [file art0066-2450-sd3.pdf]

**Supplementary Table 4.** DMLs identified between the two OA hip clusters.**Hypermethylated in OA hip cluster 2**

| Probe      | Gene         | CHR | adj.P-val  | Mean $\beta$ -value<br>OA hip cluster 1 | Mean $\beta$ -value<br>OAHip cluster 2 |
|------------|--------------|-----|------------|-----------------------------------------|----------------------------------------|
| cg03630821 | A1BG         | 19  | 0.00250493 | 0.164641216                             | 0.312356088                            |
| cg06705265 | A2BP1;A2BP1  | 16  | 0.03257623 | 0.402753815                             | 0.504963366                            |
| cg04006565 | A2BP1;A2BP1  | 16  | 0.0170157  | 0.479005173                             | 0.647337179                            |
| cg00480381 | A2BP1;A2BP1  | 16  | 0.04103591 | 0.555626159                             | 0.662725325                            |
| cg25710107 | A2LD1        | 13  | 0.00066484 | 0.371051383                             | 0.586512344                            |
| cg13776095 | A2LD1;A2LD1  | 13  | 0.00165428 | 0.549427037                             | 0.69103509                             |
| cg07439546 | ABAT;ABAT;A  | 16  | 0.00187865 | 0.309710137                             | 0.464489856                            |
| cg14151317 | ABCA2;ABCA   | 9   | 0.00061181 | 0.350937892                             | 0.629123051                            |
| cg06400857 | ABCA2;ABCA   | 9   | 7.79E-05   | 0.239323452                             | 0.364374007                            |
| cg01807748 | ABCA4        | 1   | 0.02889682 | 0.094212947                             | 0.239150668                            |
| cg07372195 | ABCA5;ABCA   | 17  | 0.00030589 | 0.632779242                             | 0.82319452                             |
| cg21660392 | ABCA8        | 17  | 0.00878444 | 0.391360066                             | 0.558473815                            |
| cg09330923 | ABCB8        | 7   | 0.00391195 | 0.601901284                             | 0.738543727                            |
| cg18473642 | ABCB9;ABCB   | 12  | 0.00040104 | 0.375679011                             | 0.523069204                            |
| cg06503456 | ABCC1;ABCC   | 16  | 0.00185575 | 0.189057581                             | 0.436965422                            |
| cg00050375 | ABCC10       | 6   | 0.00416923 | 0.335492212                             | 0.499176604                            |
| cg19211382 | ABCC13;ABC   | 21  | 0.00182198 | 0.682838607                             | 0.821210741                            |
| cg00241432 | ABCC4;ABCC   | 13  | 0.00317774 | 0.458338969                             | 0.678836895                            |
| cg09711028 | ABCC9;ABCC   | 12  | 0.01506222 | 0.497396421                             | 0.647062609                            |
| cg04210566 | ABHD14A      | 3   | 0.00761185 | 0.298630733                             | 0.401617202                            |
| cg16569813 | ABHD6        | 3   | 0.03061367 | 0.475301549                             | 0.593974123                            |
| cg10311020 | ABI1;ABI1;AE | 10  | 0.00461618 | 0.442553056                             | 0.626758178                            |
| cg03419646 | ABI3;ABI3    | 17  | 0.02084885 | 0.463946526                             | 0.575121214                            |
| cg27402766 | ABI3BP       | 3   | 0.00279081 | 0.810793598                             | 0.924214809                            |
| cg02493205 | ABI3BP       | 3   | 0.04949919 | 0.580554058                             | 0.685974325                            |
| cg14142977 | ABL1;ABL1    | 9   | 0.00314141 | 0.628172231                             | 0.74387651                             |
| cg14102055 | ABL1;ABL1    | 9   | 0.01525618 | 0.591874343                             | 0.692088401                            |
| cg05733497 | ABLIM2;ABLI  | 4   | 0.0001685  | 0.622329873                             | 0.735497741                            |
| cg14458783 | ABR;ABR      | 17  | 0.00014332 | 0.277073903                             | 0.481898644                            |
| cg04318619 | ABR;ABR      | 17  | 0.00543371 | 0.196732585                             | 0.391792113                            |
| cg08458121 | ABR;ABR      | 17  | 0.00037711 | 0.280949597                             | 0.458242402                            |
| cg22559878 | ABR;ABR      | 17  | 0.00239252 | 0.184939731                             | 0.316282972                            |
| cg23401459 | ABR;ABR      | 17  | 0.00054498 | 0.739561003                             | 0.867537317                            |
| cg10370025 | ABR;ABR;ABF  | 17  | 0.00104964 | 0.191376601                             | 0.406135169                            |
| cg10996148 | ABR;ABR;ABF  | 17  | 0.00110281 | 0.252525637                             | 0.435831639                            |
| cg17298275 | ABR;ABR;ABF  | 17  | 0.0006443  | 0.227663674                             | 0.374440816                            |
| cg05633070 | ABR;ABR;ABF  | 17  | 0.00476815 | 0.500050092                             | 0.637319642                            |
| cg24210280 | ABR;ABR;ABF  | 17  | 0.02498494 | 0.444061726                             | 0.581269547                            |
| cg19029445 | ABR;ABR;ABF  | 17  | 0.02097334 | 0.331313071                             | 0.46768659                             |
| cg23180978 | ABR;ABR;ABF  | 17  | 0.00103662 | 0.31141275                              | 0.43258369                             |

|            |             |    |            |             |             |
|------------|-------------|----|------------|-------------|-------------|
| cg10803453 | ABR;ABR;ABF | 17 | 0.00290103 | 0.504244307 | 0.621335517 |
| cg07493499 | ABR;ABR;ABF | 17 | 0.00539134 | 0.212783439 | 0.326386487 |
| cg24439623 | ABR;ABR;ABF | 17 | 0.01388229 | 0.239942307 | 0.345147577 |
| cg26809043 | ABTB2       | 11 | 0.0038042  | 0.160842479 | 0.29151944  |
| cg08663298 | ABTB2       | 11 | 0.00876901 | 0.569266866 | 0.694875019 |
| cg01369908 | ABTB2       | 11 | 0.01204487 | 0.52188456  | 0.632541164 |
| cg02434541 | ABTB2       | 11 | 0.00596842 | 0.181350698 | 0.290197258 |
| cg10548708 | ACAA1;ACAA  | 3  | 0.00138984 | 0.677775677 | 0.796105406 |
| cg01760189 | ACACA;ACAC  | 17 | 0.00055305 | 0.422327156 | 0.656723973 |
| cg16822666 | ACACA;ACAC  | 17 | 0.00838334 | 0.216817179 | 0.392377832 |
| cg10458080 | ACAD10;ACA  | 12 | 0.04606654 | 0.339322089 | 0.488247096 |
| cg21636577 | ACADVL;DLG  | 17 | 0.00146948 | 0.311352006 | 0.414147858 |
| cg08931456 | ACAP2       | 3  | 0.00029151 | 0.477382139 | 0.646338372 |
| cg19414302 | ACAP3       | 1  | 0.00223446 | 0.445083416 | 0.610889451 |
| cg03003335 | ACAP3       | 1  | 0.00283395 | 0.339636502 | 0.496075801 |
| cg22675767 | ACAP3       | 1  | 0.00082671 | 0.281792873 | 0.402951532 |
| cg25203980 | ACAP3       | 1  | 0.00024151 | 0.535218665 | 0.653691753 |
| cg17475583 | ACBD6       | 1  | 0.01156514 | 0.145996465 | 0.366513713 |
| cg09143318 | ACCN1       | 17 | 0.01343132 | 0.288324091 | 0.43261249  |
| cg26142972 | ACCN4;ACCN  | 2  | 0.00288105 | 0.192501199 | 0.328523173 |
| cg03476105 | ACN9        | 7  | 0.02195899 | 0.649203543 | 0.75355776  |
| cg08172947 | ACO2        | 22 | 0.00854525 | 0.489654681 | 0.619897449 |
| cg18180407 | ACOT11;ACO  | 1  | 0.00060628 | 0.248403516 | 0.446125729 |
| cg02328793 | ACOT7;ACOT  | 1  | 0.00826412 | 0.48472418  | 0.59095226  |
| cg26570804 | ACOT7;ACOT  | 1  | 0.00423319 | 0.224161622 | 0.477782972 |
| cg11654006 | ACOT7;ACOT  | 1  | 0.00033508 | 0.241004058 | 0.459428959 |
| cg11723698 | ACOT7;ACOT  | 1  | 0.01817928 | 0.757920231 | 0.916295454 |
| cg06834177 | ACOT7;ACOT  | 1  | 0.01652881 | 0.351614965 | 0.483314544 |
| cg26869512 | ACOX3;ACOX  | 4  | 0.00042068 | 0.472987533 | 0.720459932 |
| cg09133485 | ACOX3;ACOX  | 4  | 0.0028278  | 0.357061475 | 0.530446365 |
| cg24597207 | ACOX3;ACOX  | 4  | 0.00018166 | 0.602107214 | 0.769547192 |
| cg08529267 | ACOX3;ACOX  | 4  | 0.00461781 | 0.444319606 | 0.60956493  |
| cg17949316 | ACOX3;ACOX  | 4  | 0.00068943 | 0.51568075  | 0.667680562 |
| cg08206079 | ACOX3;ACOX  | 4  | 0.00303663 | 0.476108942 | 0.620384391 |
| cg18038894 | ACSF2       | 17 | 0.00021343 | 0.339116683 | 0.477970004 |
| cg22002216 | ACSF2       | 17 | 0.00920225 | 0.446782501 | 0.557138916 |
| cg12649208 | ACSF2       | 17 | 0.0023201  | 0.135466674 | 0.238122239 |
| cg14906909 | ACSS3       | 12 | 0.02400332 | 0.344800749 | 0.490894429 |
| cg24691835 | ACTG2       | 2  | 0.00358506 | 0.452169894 | 0.559665405 |
| cg08292104 | ACTN1;ACTN  | 14 | 0.04435728 | 0.305097615 | 0.437524171 |
| cg01234517 | ACTR3C;LRR  | 7  | 0.00329933 | 0.381950564 | 0.506558464 |
| cg24474409 | ACTR3C;LRR  | 7  | 0.01038947 | 0.371185095 | 0.489737548 |
| cg00653455 | ACTR8       | 3  | 0.01278775 | 0.420301671 | 0.634079898 |
| cg26808747 | ADAM12;AD   | 10 | 0.00101966 | 0.113903118 | 0.220644483 |
| cg09648467 | ADAM19      | 5  | 0.01113436 | 0.097300219 | 0.204524774 |
| cg03780701 | ADAM32      | 8  | 0.00990569 | 0.16973473  | 0.2814019   |

|            |             |    |            |             |             |
|------------|-------------|----|------------|-------------|-------------|
| cg05945984 | ADAM9;ADA   | 8  | 0.00420014 | 0.726065279 | 0.862571845 |
| cg12845177 | ADAMTS10    | 19 | 0.01734749 | 0.557798494 | 0.73075421  |
| cg26523264 | ADAMTS10    | 19 | 0.00178639 | 0.588922941 | 0.730867475 |
| cg19662846 | ADAMTS10    | 19 | 0.00203269 | 0.264227961 | 0.38650826  |
| cg11990296 | ADAMTS10    | 19 | 0.00067347 | 0.549654502 | 0.661787855 |
| cg06982745 | ADAMTS14;A  | 10 | 0.01591399 | 0.442362271 | 0.586577155 |
| cg16398051 | ADAMTS17    | 15 | 0.03154219 | 0.609799225 | 0.826725764 |
| cg24368226 | ADAMTS17    | 15 | 0.02014055 | 0.222202013 | 0.343087579 |
| cg17212277 | ADAMTS2;AI  | 5  | 0.00333804 | 0.510230732 | 0.646348946 |
| cg27000228 | ADAMTS2;AI  | 5  | 0.0009872  | 0.380894877 | 0.512527339 |
| cg17745098 | ADAMTS2;AI  | 5  | 0.00076565 | 0.249238432 | 0.363866818 |
| cg21901223 | ADAMTS2;AI  | 5  | 0.00575134 | 0.316449622 | 0.428210192 |
| cg10077410 | ADAMTS7     | 15 | 0.00207283 | 0.422267581 | 0.54938843  |
| cg13468759 | ADAMTSL1;A  | 9  | 0.00037618 | 0.382985308 | 0.628178484 |
| cg18127823 | ADAP1       | 7  | 0.0015281  | 0.315317863 | 0.451126162 |
| cg15483084 | ADAP1       | 7  | 0.01043662 | 0.260401803 | 0.363914253 |
| cg00048381 | ADAR        | 1  | 0.02278897 | 0.542447027 | 0.676411417 |
| cg24304309 | ADAR;ADAR;  | 1  | 0.00051121 | 0.35905453  | 0.463130102 |
| cg00927699 | ADARB1;C21  | 21 | 0.00423728 | 0.391007478 | 0.534657805 |
| cg08944086 | ADARB2      | 10 | 0.00799467 | 0.206137899 | 0.338786503 |
| cg26361041 | ADARB2      | 10 | 0.03449503 | 0.325690567 | 0.455399375 |
| cg16990474 | ADARB2      | 10 | 0.03019484 | 0.381855748 | 0.510354633 |
| cg09265586 | ADARB2      | 10 | 0.00951    | 0.207806686 | 0.315401841 |
| cg01397065 | ADAT3;SCAM  | 19 | 0.00273745 | 0.308971266 | 0.519573665 |
| cg19254118 | ADAT3;SCAM  | 19 | 0.00082946 | 0.532927309 | 0.720773351 |
| cg01294521 | ADAT3;SCAM  | 19 | 0.00108372 | 0.374868242 | 0.55555984  |
| cg20243900 | ADAT3;SCAM  | 19 | 0.02284661 | 0.508606074 | 0.655070206 |
| cg06887224 | ADCY2       | 5  | 0.00702457 | 0.199281727 | 0.361333685 |
| cg14418176 | ADCY3       | 2  | 0.00574986 | 0.161712692 | 0.30099399  |
| cg10639428 | ADCY3       | 2  | 0.00764462 | 0.214136675 | 0.321442333 |
| cg08266286 | ADCY3;ADCY  | 2  | 0.00551279 | 0.139952645 | 0.259579755 |
| cg15464481 | ADCY5       | 3  | 0.03847114 | 0.227944189 | 0.337239188 |
| cg00061520 | ADCY9       | 16 | 0.01232696 | 0.425369719 | 0.616336268 |
| cg00162104 | ADD1;ADD1;  | 4  | 0.00275012 | 0.406723022 | 0.590406955 |
| cg02063365 | ADI1        | 2  | 0.00691143 | 0.642953897 | 0.748343124 |
| cg14271690 | ADIG        | 20 | 0.00145929 | 0.206512744 | 0.354234742 |
| cg03532879 | ADIG        | 20 | 0.00236096 | 0.547825477 | 0.678977836 |
| cg27392775 | ADIPOR1;AD  | 1  | 0.01234141 | 0.550501042 | 0.657608291 |
| cg19678564 | ADORA1;ADC  | 1  | 0.00168527 | 0.25508631  | 0.410317426 |
| cg21083556 | ADSSL1      | 14 | 0.00011092 | 0.337632906 | 0.547150284 |
| cg04522949 | ADSSL1;ADSS | 14 | 0.00030045 | 0.422092962 | 0.530057127 |
| cg07406289 | AFAP1;AFAP: | 4  | 0.00823662 | 0.203797978 | 0.325549281 |
| cg01592387 | AFAP1;AFAP: | 4  | 0.03401309 | 0.447765525 | 0.59920691  |
| cg07109358 | AFAP1;AFAP: | 4  | 0.00032083 | 0.332917513 | 0.460244527 |
| cg20147046 | AFAP1;AFAP: | 4  | 0.00111041 | 0.32498188  | 0.434825597 |
| cg00624564 | AFAP1;AFAP: | 4  | 0.03153492 | 0.67252901  | 0.78104111  |

|            |             |    |            |             |             |
|------------|-------------|----|------------|-------------|-------------|
| cg02465859 | AFAP1L2;AFA | 10 | 0.03065544 | 0.205171512 | 0.33166208  |
| cg17875845 | AFF1;AFF1   | 4  | 0.00053355 | 0.362248275 | 0.601250812 |
| cg25350306 | AFF3;AFF3   | 2  | 0.00547429 | 0.193763992 | 0.38150812  |
| cg20965469 | AFF3;AFF3   | 2  | 0.00030197 | 0.594421368 | 0.764613267 |
| cg13353679 | AFF3;AFF3   | 2  | 0.01789311 | 0.169026096 | 0.305539857 |
| cg19542849 | AFF3;AFF3   | 2  | 0.00132293 | 0.3054993   | 0.424786047 |
| cg14941226 | AFF3;AFF3   | 2  | 0.02762688 | 0.582909024 | 0.690897363 |
| cg10140126 | AFF3;AFF3   | 2  | 0.01538294 | 0.468249843 | 0.571461326 |
| cg01254170 | AGAP1;AGAF  | 2  | 0.00272851 | 0.354969107 | 0.539203593 |
| cg09646946 | AGAP1;AGAF  | 2  | 0.04602924 | 0.620554642 | 0.745550701 |
| cg23467747 | AGAP1;AGAF  | 2  | 0.00222897 | 0.655963345 | 0.779146519 |
| cg07164047 | AGAP1;AGAF  | 2  | 0.04893451 | 0.507113761 | 0.611605606 |
| cg15068641 | AGAP1;AGAF  | 2  | 0.00591638 | 0.362968347 | 0.463161308 |
| cg03505148 | AGAP2;AGAF  | 12 | 0.00045743 | 0.298615517 | 0.440972548 |
| cg12253175 | AGAP2;AGAF  | 12 | 0.00329933 | 0.241141695 | 0.368344683 |
| cg14795572 | AGAP2;AGAF  | 12 | 0.00122029 | 0.382787351 | 0.505736043 |
| cg09596958 | AGAP2;AGAF  | 12 | 0.01494635 | 0.255879309 | 0.374993484 |
| cg22507723 | AGAP2;AGAF  | 12 | 0.00139041 | 0.245098527 | 0.349061839 |
| cg23387569 | AGAP2;LOC1  | 12 | 0.00144872 | 0.20523729  | 0.35265241  |
| cg14845962 | AGAP2;LOC1  | 12 | 0.01214237 | 0.116927372 | 0.251252748 |
| cg06314111 | AGAP2;LOC1  | 12 | 0.00040104 | 0.277384282 | 0.395718862 |
| cg16823042 | AGAP2;LOC1  | 12 | 0.00368527 | 0.227523778 | 0.330730545 |
| cg25417842 | AGAP3       | 7  | 0.00300773 | 0.360590965 | 0.494843433 |
| cg11817411 | AGAP3;AGAF  | 7  | 0.01400471 | 0.488400503 | 0.598411259 |
| cg04712895 | AGAP3;AGAF  | 7  | 0.01067648 | 0.172446317 | 0.282156851 |
| cg03743037 | AGBL3       | 7  | 0.01657119 | 0.78158743  | 0.890490886 |
| cg08321684 | AGER;AGER   | 6  | 0.00967567 | 0.324072329 | 0.489310998 |
| cg05914981 | AGER;AGER   | 6  | 0.00039237 | 0.280400375 | 0.402319568 |
| cg19730924 | AGPAT1;AGP  | 6  | 0.00564559 | 0.428070465 | 0.533436851 |
| cg01331461 | AGPAT3;AGP  | 21 | 0.00613872 | 0.176623444 | 0.293757269 |
| cg12466405 | AGPAT3;AGP  | 21 | 0.01194328 | 0.797118083 | 0.900066164 |
| cg23638070 | AGPAT5      | 8  | 0.00886749 | 0.64968304  | 0.835007005 |
| cg24485696 | AGPAT5      | 8  | 0.02624679 | 0.660085226 | 0.770932764 |
| cg12859101 | AGPAT6      | 8  | 0.00093798 | 0.460144965 | 0.62023927  |
| cg18272461 | AGRN        | 1  | 0.00084423 | 0.302720746 | 0.415075317 |
| cg06712559 | AGRN        | 1  | 0.00575542 | 0.075633311 | 0.185699747 |
| cg08057869 | AGXT2L1;AG  | 4  | 6.44E-05   | 0.23200824  | 0.442710695 |
| cg07181257 | AHDC1       | 1  | 0.00022303 | 0.330121645 | 0.506696331 |
| cg13373315 | AHDC1       | 1  | 0.00017473 | 0.393254854 | 0.532952513 |
| cg02283949 | AIG1        | 6  | 0.00921506 | 0.155882031 | 0.347618749 |
| cg03113916 | AIG1        | 6  | 0.00063619 | 0.410680431 | 0.592850051 |
| cg18689454 | AIRE        | 21 | 0.00567394 | 0.255045924 | 0.399923662 |
| cg16717549 | AIRE        | 21 | 0.00484386 | 0.322850234 | 0.449476567 |
| cg11923631 | AIRE        | 21 | 0.00298396 | 0.251442892 | 0.356321212 |
| cg09510531 | AIRE        | 21 | 0.00065681 | 0.312413611 | 0.414907046 |
| cg27251412 | AIRE        | 21 | 0.00135604 | 0.277257234 | 0.377657354 |

|            |             |    |            |             |             |
|------------|-------------|----|------------|-------------|-------------|
| cg06483820 | AKAP1       | 17 | 0.00045961 | 0.507563786 | 0.689442975 |
| cg13263323 | AKAP13;AKA  | 15 | 0.00384471 | 0.175689452 | 0.391486894 |
| cg17133734 | AKAP13;AKA  | 15 | 0.01060528 | 0.230696665 | 0.421858518 |
| cg19792099 | AKAP5       | 14 | 0.01168301 | 0.573374271 | 0.682378471 |
| cg25862117 | AKAP7       | 6  | 0.00240483 | 0.167542712 | 0.306832253 |
| cg19765281 | AKAP8       | 19 | 0.00162288 | 0.377749584 | 0.488074003 |
| cg09794444 | AKD1        | 6  | 0.00139832 | 0.599161025 | 0.757608282 |
| cg14274357 | AKT1;AKT1;A | 14 | 0.00308382 | 0.327610897 | 0.477972537 |
| cg07160992 | AKT1;AKT1;A | 14 | 0.02221094 | 0.376452479 | 0.497788943 |
| cg04820159 | AKT1;AKT1;A | 14 | 0.03608351 | 0.134692812 | 0.239367091 |
| cg13351352 | AKT2        | 19 | 0.00813856 | 0.313597342 | 0.481759052 |
| cg24455383 | AKT3;AKT3   | 1  | 0.00520139 | 0.540084401 | 0.727918321 |
| cg11973514 | AKT3;AKT3   | 1  | 0.00993992 | 0.762790885 | 0.866938376 |
| cg09025274 | ALCAM       | 3  | 0.00038848 | 0.638816505 | 0.765513985 |
| cg19852058 | ALCAM       | 3  | 0.04058092 | 0.719050481 | 0.838523504 |
| cg21832978 | ALCAM       | 3  | 0.01145764 | 0.547632398 | 0.664843966 |
| cg27451508 | ALDH3A1     | 17 | 0.0003098  | 0.613094946 | 0.747476598 |
| cg04088289 | ALDH4A1;ALI | 1  | 0.00101424 | 0.495246036 | 0.623211836 |
| cg00577167 | ALDOB       | 9  | 0.03601201 | 0.273747571 | 0.406511626 |
| cg14908875 | ALKBH3      | 11 | 0.02608533 | 0.625700584 | 0.735599743 |
| cg01928068 | ALKBH3      | 11 | 0.00157885 | 0.606195466 | 0.707535187 |
| cg02493798 | ALOX12      | 17 | 0.01415537 | 0.120834891 | 0.254865208 |
| cg03762994 | ALOX12      | 17 | 0.0427518  | 0.162343788 | 0.296095518 |
| cg12262378 | ALOX12      | 17 | 0.03643743 | 0.134057978 | 0.24624951  |
| cg18007837 | ALOX12P2    | 17 | 0.00220817 | 0.147305798 | 0.2690911   |
| cg11027217 | ALPK1;ALPK1 | 4  | 0.00151625 | 0.352568572 | 0.463715212 |
| cg00031779 | ALPK2       | 18 | 0.00210549 | 0.303876626 | 0.477872153 |
| cg07910680 | ALPK2       | 18 | 0.00036524 | 0.196030007 | 0.360627457 |
| cg27555092 | ALPK2       | 18 | 0.00613024 | 0.115517064 | 0.257460308 |
| cg25407077 | ALPK2       | 18 | 0.00089633 | 0.546546741 | 0.682559251 |
| cg27614534 | ALPK2       | 18 | 0.00322688 | 0.597047239 | 0.710623775 |
| cg14386193 | ALPK2;ALPK2 | 18 | 0.0308337  | 0.29934273  | 0.428016443 |
| cg00894103 | ALPK3       | 15 | 0.01883409 | 0.368047472 | 0.523353153 |
| cg26893816 | AMACR;AMA   | 5  | 0.01260793 | 0.200865883 | 0.331662819 |
| cg23449274 | AMBRA1      | 11 | 0.00520462 | 0.69003337  | 0.794464003 |
| cg01818391 | AMDHD1      | 12 | 0.01896085 | 0.598398794 | 0.703857721 |
| cg16636114 | AMH;AMH     | 19 | 0.00840173 | 0.63693363  | 0.741394213 |
| cg20406747 | AMHR2;AMH   | 12 | 0.00052338 | 0.219521064 | 0.407437119 |
| cg01636354 | AMOTL2      | 3  | 0.01498125 | 0.153791204 | 0.264338542 |
| cg08173606 | AMOTL2      | 3  | 0.0423065  | 0.109545445 | 0.217338924 |
| cg27565899 | AMPD2;AMP   | 1  | 0.00237678 | 0.163010092 | 0.276358924 |
| cg25772143 | AMPD2;AMP   | 1  | 0.00055056 | 0.263212584 | 0.372457804 |
| cg18015301 | AMPH;AMPH   | 7  | 0.00186103 | 0.241032897 | 0.398243395 |
| cg22308970 | AMPH;AMPH   | 7  | 0.01134237 | 0.507245969 | 0.633195932 |
| cg06618764 | AMZ1        | 7  | 6.44E-05   | 0.306094621 | 0.460655027 |
| cg06703803 | ANAPC7      | 12 | 0.00098708 | 0.237159758 | 0.475931096 |

|            |            |    |            |             |             |
|------------|------------|----|------------|-------------|-------------|
| cg25116615 | ANGPT1     | 8  | 0.03852062 | 0.47267511  | 0.597278091 |
| cg03639897 | ANGPT4     | 20 | 0.01307108 | 0.297930803 | 0.401089978 |
| cg05234958 | ANK1;ANK1; | 8  | 0.00043672 | 0.575268542 | 0.709486974 |
| cg07677598 | ANK2       | 4  | 0.00036622 | 0.416422697 | 0.657477315 |
| cg13555290 | ANK2       | 4  | 0.01264439 | 0.297570072 | 0.490906627 |
| cg17665652 | ANK2;ANK2; | 4  | 0.00582835 | 0.087405806 | 0.283746114 |
| cg02296478 | ANK2;ANK2; | 4  | 0.00626215 | 0.134925025 | 0.271243109 |
| cg12055265 | ANK2;ANK2; | 4  | 0.04407341 | 0.763670348 | 0.883837239 |
| cg00294550 | ANK3       | 10 | 0.02428736 | 0.110394254 | 0.229788108 |
| cg01497527 | ANKDD1A    | 15 | 0.0009943  | 0.381008506 | 0.497073255 |
| cg07118895 | ANKFN1     | 17 | 0.03333689 | 0.151789026 | 0.256232043 |
| cg04023742 | ANKLE2     | 12 | 0.00065064 | 0.697276732 | 0.808639861 |
| cg20647656 | ANKMY1;ANI | 2  | 0.00055372 | 0.586297407 | 0.715448071 |
| cg25810938 | ANKMY1;ANI | 2  | 0.02202689 | 0.098602543 | 0.225030956 |
| cg03743720 | ANKMY1;ANI | 2  | 0.00067726 | 0.146987426 | 0.270399275 |
| cg07592361 | ANKMY1;ANI | 2  | 0.00818574 | 0.149929951 | 0.250878727 |
| cg09486407 | ANKRD11    | 16 | 0.00048329 | 0.391947559 | 0.631292361 |
| cg09420319 | ANKRD11    | 16 | 0.0028151  | 0.257499233 | 0.473644106 |
| cg08420923 | ANKRD11    | 16 | 0.00393529 | 0.282726668 | 0.451340197 |
| cg00488747 | ANKRD11    | 16 | 0.00241324 | 0.571554166 | 0.739891576 |
| cg05071195 | ANKRD11    | 16 | 0.00287805 | 0.199011499 | 0.340286542 |
| cg06567829 | ANKRD11    | 16 | 0.04018791 | 0.376131129 | 0.513765874 |
| cg00770754 | ANKRD11    | 16 | 0.00201051 | 0.483001216 | 0.618096741 |
| cg00332509 | ANKRD11    | 16 | 0.00528039 | 0.504253126 | 0.636917112 |
| cg03163759 | ANKRD11    | 16 | 8.30E-05   | 0.239028943 | 0.362143001 |
| cg27468976 | ANKRD11    | 16 | 0.01398076 | 0.16153131  | 0.267966363 |
| cg22889914 | ANKRD2;ANK | 10 | 0.00163987 | 0.430491287 | 0.606947642 |
| cg10343327 | ANKRD2;ANK | 10 | 0.00106511 | 0.441144431 | 0.612031215 |
| cg02950892 | ANKRD2;ANK | 10 | 0.01159322 | 0.327879821 | 0.464269958 |
| cg09114211 | ANKRD23    | 2  | 0.00016884 | 0.550049013 | 0.658221202 |
| cg25290139 | ANKRD23    | 2  | 0.03547733 | 0.626620933 | 0.734453759 |
| cg10284115 | ANKRD28    | 3  | 0.01572505 | 0.759583607 | 0.88155192  |
| cg25612428 | ANKRD33B   | 5  | 0.00053405 | 0.364908679 | 0.522374885 |
| cg16343302 | ANKRD33B   | 5  | 0.00138414 | 0.697957036 | 0.822433228 |
| cg03701266 | ANKRD33B   | 5  | 0.00212896 | 0.410282483 | 0.53189567  |
| cg21167493 | ANKRD33B   | 5  | 0.02601192 | 0.50236312  | 0.621917893 |
| cg13276570 | ANKRD33B   | 5  | 0.00216283 | 0.560715532 | 0.675126287 |
| cg26741686 | ANKRD37    | 4  | 0.02061896 | 0.136339271 | 0.242712093 |
| cg04869949 | ANKRD44    | 2  | 0.0017987  | 0.588091446 | 0.725988376 |
| cg07683388 | ANKRD44    | 2  | 0.00024762 | 0.226947369 | 0.35178921  |
| cg16501561 | ANKRD55    | 5  | 0.03253717 | 0.180292628 | 0.345655302 |
| cg26978611 | ANKRD6     | 6  | 0.00578879 | 0.18604594  | 0.299178831 |
| cg03613003 | ANO1;ANO1  | 11 | 0.00120326 | 0.260606952 | 0.471881408 |
| cg15767218 | ANO1;ANO1  | 11 | 0.00231554 | 0.241699826 | 0.438380509 |
| cg02179492 | ANO1;ANO1  | 11 | 0.0015487  | 0.578788019 | 0.697811215 |
| cg13767135 | ANO1;ANO1  | 11 | 0.02843835 | 0.197953411 | 0.305210194 |

|            |            |    |            |             |             |
|------------|------------|----|------------|-------------|-------------|
| cg04146573 | ANO1;ANO1  | 11 | 0.00747639 | 0.129340911 | 0.23419383  |
| cg04574152 | ANO2       | 12 | 0.02630975 | 0.454784795 | 0.563227429 |
| cg14399475 | ANO2       | 12 | 0.00019215 | 0.598097788 | 0.701949814 |
| cg23336996 | ANO6;ANO6; | 12 | 0.03883076 | 0.163000544 | 0.271258168 |
| cg01410615 | ANO7       | 2  | 0.0005395  | 0.134419961 | 0.317379739 |
| cg25605313 | ANO8       | 19 | 0.02773559 | 0.141089272 | 0.259453234 |
| cg24192660 | ANO8       | 19 | 0.02664812 | 0.226322454 | 0.340649949 |
| cg24530041 | ANPEP      | 15 | 0.00395835 | 0.377934522 | 0.524109981 |
| cg13042288 | ANPEP      | 15 | 0.02657227 | 0.626479377 | 0.750965473 |
| cg21935536 | ANPEP      | 15 | 0.03110225 | 0.465246032 | 0.575193498 |
| cg20836795 | ANTXR1;ANT | 2  | 0.01133182 | 0.186321459 | 0.350050375 |
| cg03164800 | ANTXR2     | 4  | 0.00953655 | 0.502428778 | 0.626775236 |
| cg03730709 | ANXA11;ANX | 10 | 0.00185899 | 0.209334905 | 0.36631891  |
| cg11900509 | ANXA11;ANX | 10 | 0.00129947 | 0.171892946 | 0.312723454 |
| cg15892650 | ANXA6;ANXA | 5  | 0.00727447 | 0.340328371 | 0.452762554 |
| cg20437604 | ANXA9;ANXA | 1  | 0.00197009 | 0.316694483 | 0.474317095 |
| cg18043280 | AOC2;AOC2  | 17 | 0.00719766 | 0.183998214 | 0.333619006 |
| cg14707353 | AOX1       | 2  | 0.00852243 | 0.628392118 | 0.773853935 |
| cg03832197 | AOX2P      | 2  | 0.00522133 | 0.303299207 | 0.482948439 |
| cg14557787 | AP2A1;AP2A | 19 | 0.00024762 | 0.412878655 | 0.520053189 |
| cg27205902 | AP2A2      | 11 | 0.00055215 | 0.337275229 | 0.654611801 |
| cg21185674 | AP2A2      | 11 | 0.0081004  | 0.392061148 | 0.530248853 |
| cg02570643 | AP3B1      | 5  | 0.0007159  | 0.537515085 | 0.679031632 |
| cg17656426 | AP3D1;AP3D | 19 | 0.00119278 | 0.531996752 | 0.699010005 |
| cg23429735 | AP4E1      | 15 | 0.01010298 | 0.631892475 | 0.772145442 |
| cg13917002 | APBA1      | 9  | 0.01609999 | 0.194086661 | 0.323022456 |
| cg27216937 | APBB1;APBB | 11 | 0.01069784 | 0.518329954 | 0.63524097  |
| cg16492341 | APBB1IP    | 10 | 0.00130817 | 0.201046702 | 0.355754884 |
| cg10331073 | APBB1IP    | 10 | 0.00839953 | 0.178768694 | 0.313919043 |
| cg18014277 | APBB1IP    | 10 | 0.00522459 | 0.649907294 | 0.779381118 |
| cg23774717 | APBB1IP    | 10 | 0.01001963 | 0.201215994 | 0.320458344 |
| cg23877017 | APBB2;APBB | 4  | 0.01852405 | 0.234259256 | 0.411412104 |
| cg26865481 | APBB2;APBB | 4  | 0.01164891 | 0.691365705 | 0.80214846  |
| cg04229487 | APCDD1     | 18 | 0.03363239 | 0.570687064 | 0.68282975  |
| cg25611723 | APCDD1     | 18 | 0.01277966 | 0.287775595 | 0.39688662  |
| cg03401480 | APCDD1L    | 20 | 0.01809888 | 0.16133784  | 0.262302084 |
| cg15727249 | APOA4      | 11 | 0.00063697 | 0.200645732 | 0.306278872 |
| cg17548735 | APOBEC2;AP | 6  | 1.74E-05   | 0.275543772 | 0.498286787 |
| cg24424889 | APOBEC3H;A | 22 | 0.01441908 | 0.423831125 | 0.561982428 |
| cg09444226 | APOLD1     | 12 | 0.01696611 | 0.449578849 | 0.587185298 |
| cg05502439 | AQP6       | 12 | 0.00391785 | 0.211541094 | 0.345208008 |
| cg00604736 | AQP6;AQP6  | 12 | 0.00147638 | 0.218103624 | 0.335348651 |
| cg27321325 | ARAP1;ARAP | 11 | 0.02717969 | 0.316581065 | 0.441863902 |
| cg00238848 | ARAP1;ARAP | 11 | 0.00262461 | 0.310500663 | 0.412761361 |
| cg00487506 | ARC        | 8  | 0.00457136 | 0.441580561 | 0.56608734  |
| cg03059876 | ARFGAP1;AR | 20 | 0.00073803 | 0.224687052 | 0.329363558 |

|            |             |    |            |             |             |
|------------|-------------|----|------------|-------------|-------------|
| cg16178743 | ARG1;MED2   | 6  | 0.03077534 | 0.442694397 | 0.583030189 |
| cg24867153 | ARGLU1      | 13 | 0.00168146 | 0.783945671 | 0.893715595 |
| cg26282731 | ARHGAP10    | 4  | 0.00886583 | 0.167758448 | 0.341486785 |
| cg01165159 | ARHGAP10    | 4  | 0.00165587 | 0.248282098 | 0.407273852 |
| cg14780276 | ARHGAP10    | 4  | 0.01294623 | 0.307953785 | 0.451212709 |
| cg01381498 | ARHGAP10    | 4  | 0.04268784 | 0.318465736 | 0.434540954 |
| cg14575356 | ARHGAP18    | 6  | 0.04620986 | 0.209750223 | 0.32447465  |
| cg16775752 | ARHGAP22    | 10 | 0.00486332 | 0.306376976 | 0.447772094 |
| cg25139229 | ARHGAP22    | 10 | 0.00385276 | 0.142419756 | 0.255820455 |
| cg26117265 | ARHGAP22    | 10 | 0.00761795 | 0.367005715 | 0.469771828 |
| cg20028019 | ARHGAP23    | 17 | 0.00043968 | 0.435437576 | 0.590857923 |
| cg03930313 | ARHGAP23    | 17 | 0.00458583 | 0.178109514 | 0.316058556 |
| cg23367339 | ARHGAP23    | 17 | 0.00025547 | 0.642947464 | 0.749903555 |
| cg05204171 | ARHGAP26;A  | 5  | 0.01813132 | 0.669130413 | 0.774098907 |
| cg23659289 | ARHGAP27;A  | 17 | 0.00050716 | 0.10428184  | 0.231328122 |
| cg19943578 | ARHGAP27;A  | 17 | 0.00648112 | 0.294561055 | 0.419293245 |
| cg27244773 | ARHGAP27;A  | 17 | 0.000403   | 0.277116543 | 0.459782395 |
| cg10094238 | ARHGAP27;A  | 17 | 6.44E-05   | 0.270791656 | 0.41338586  |
| cg26074051 | ARHGDI      | 17 | 0.00147345 | 0.674104754 | 0.885381121 |
| cg25141766 | ARHGDI      | 17 | 0.00026045 | 0.440952138 | 0.560474863 |
| cg10236857 | ARHGDI      | 17 | 3.77E-05   | 0.33079401  | 0.449934518 |
| cg11326429 | ARHGDI      | 17 | 0.00253806 | 0.236499626 | 0.348537888 |
| cg24299913 | ARHGEF1;AR  | 19 | 0.03178618 | 0.491802914 | 0.616382233 |
| cg05503433 | ARHGEF1;AR  | 19 | 0.00367549 | 0.382115324 | 0.489228135 |
| cg01824603 | ARHGEF10    | 8  | 0.00064977 | 0.366546864 | 0.618851254 |
| cg07694735 | ARHGEF10    | 8  | 3.61E-05   | 0.347484247 | 0.591467974 |
| cg06807837 | ARHGEF10    | 8  | 0.00011726 | 0.518840438 | 0.741022684 |
| cg03705571 | ARHGEF10    | 8  | 0.00128815 | 0.274187235 | 0.467299394 |
| cg22223001 | ARHGEF10    | 8  | 0.0028501  | 0.5484619   | 0.720933775 |
| cg20690085 | ARHGEF10    | 8  | 0.01214237 | 0.210965048 | 0.383285752 |
| cg23780635 | ARHGEF10    | 8  | 0.00090595 | 0.310520875 | 0.482323737 |
| cg20149022 | ARHGEF10    | 8  | 0.00606751 | 0.325416639 | 0.480548176 |
| cg01607321 | ARHGEF10    | 8  | 0.01599565 | 0.311016773 | 0.450275702 |
| cg08381013 | ARHGEF10    | 8  | 0.00159001 | 0.596496555 | 0.711887308 |
| cg21161403 | ARHGEF10    | 8  | 0.00066183 | 0.269351274 | 0.381918397 |
| cg09915232 | ARHGEF10    | 8  | 0.00047308 | 0.567908967 | 0.677782147 |
| cg15414698 | ARHGEF10    | 8  | 0.0373181  | 0.599435118 | 0.706889533 |
| cg10195336 | ARHGEF10    | 8  | 0.03567034 | 0.325837394 | 0.431528188 |
| cg20294080 | ARHGEF10L;A | 1  | 0.00555981 | 0.248072822 | 0.394127384 |
| cg09754341 | ARHGEF12    | 11 | 0.00394117 | 0.716894462 | 0.858443753 |
| cg24371534 | ARHGEF16    | 1  | 0.00025927 | 0.35765579  | 0.486893246 |
| cg20933326 | ARHGEF16    | 1  | 0.00104964 | 0.31175455  | 0.435630099 |
| cg16017089 | ARHGEF17    | 11 | 0.00901469 | 0.107987528 | 0.223034475 |
| cg18252633 | ARHGEF17    | 11 | 0.00197833 | 0.168078808 | 0.276092112 |
| cg23460145 | ARHGEF17    | 11 | 0.00050336 | 0.328831307 | 0.430683903 |
| cg03887218 | ARHGEF19    | 1  | 7.87E-05   | 0.252699634 | 0.429029832 |



|            |             |    |            |             |             |
|------------|-------------|----|------------|-------------|-------------|
| cg20430773 | ARHGEF19    | 1  | 0.00323249 | 0.099369461 | 0.229873151 |
| cg05400732 | ARHGEF3     | 3  | 0.00056907 | 0.256830513 | 0.513248874 |
| cg05722035 | ARHGEF3     | 3  | 0.01035148 | 0.323638331 | 0.510708448 |
| cg14987175 | ARID1B;ARID | 6  | 0.00052359 | 0.28806615  | 0.441299616 |
| cg03561416 | ARID1B;ARID | 6  | 0.00837599 | 0.204191354 | 0.353665841 |
| cg17596249 | ARID1B;ARID | 6  | 0.04628179 | 0.220993327 | 0.369242306 |
| cg05466469 | ARID1B;ARID | 6  | 0.02919134 | 0.130911618 | 0.260792034 |
| cg02671826 | ARID1B;ARID | 6  | 0.00651901 | 0.68716291  | 0.803086532 |
| cg04606397 | ARID1B;ARID | 6  | 0.03092007 | 0.478031234 | 0.585277316 |
| cg26758131 | ARID5B      | 10 | 0.02321361 | 0.479282892 | 0.582267444 |
| cg10845391 | ARL10       | 5  | 0.00581964 | 0.20145972  | 0.37433558  |
| cg21467371 | ARL16       | 17 | 0.00019723 | 0.294023352 | 0.418156332 |
| cg06876872 | ARL8A       | 1  | 0.00815729 | 0.556195313 | 0.665291795 |
| cg19140602 | ARMC4       | 10 | 0.00690636 | 0.333349108 | 0.531758292 |
| cg18113295 | ARMC9       | 2  | 0.04422834 | 0.123879402 | 0.226649024 |
| cg13295549 | ARNT2       | 15 | 0.0114387  | 0.117813133 | 0.229088936 |
| cg10435282 | ARNTL;ARNT  | 11 | 0.00088792 | 0.444813625 | 0.636857681 |
| cg19536902 | ARNTL;ARNT  | 11 | 0.01976884 | 0.667244359 | 0.78565992  |
| cg11699265 | ARPC1B      | 7  | 0.00109061 | 0.18280202  | 0.314634526 |
| cg22729543 | ARPC1B      | 7  | 0.00710599 | 0.428804083 | 0.530622967 |
| cg21852346 | ARPP-21;ARF | 3  | 0.0022313  | 0.500838777 | 0.690756549 |
| cg25399818 | ARRB2;ARRB  | 17 | 0.00083907 | 0.674706835 | 0.775205878 |
| cg17456851 | ARSB        | 5  | 0.00072247 | 0.442519695 | 0.728502071 |
| cg15922611 | ARSJ        | 4  | 0.04225505 | 0.207289645 | 0.368396445 |
| cg06160171 | ARSJ        | 4  | 0.03271149 | 0.384470387 | 0.493990132 |
| cg13258774 | ASAP2;ASAP: | 2  | 0.00723386 | 0.108894282 | 0.243702697 |
| cg05027258 | ASAP2;ASAP: | 2  | 0.04773034 | 0.725987815 | 0.858826987 |
| cg05991902 | ASAP2;ASAP: | 2  | 0.02048863 | 0.30679695  | 0.423923711 |
| cg10903916 | ASAP2;ASAP: | 2  | 0.01993048 | 0.712929676 | 0.823693196 |
| cg17731409 | ASAP2;ASAP: | 2  | 0.00817439 | 0.187825596 | 0.289621611 |
| cg24580199 | ASAP3;ASAP: | 1  | 0.03710499 | 0.246753081 | 0.408397028 |
| cg24654025 | ASB13;ASB1: | 10 | 0.00967116 | 0.406724687 | 0.541646094 |
| cg05685483 | ASB18       | 2  | 0.01018299 | 0.363766338 | 0.503519669 |
| cg25692621 | ASB4;ASB4   | 7  | 0.01037023 | 0.587987027 | 0.724857683 |
| cg11554605 | ASB4;ASB4   | 7  | 0.02126461 | 0.702187536 | 0.826856838 |
| cg23685969 | ASCC1;C10or | 10 | 0.00898626 | 0.568748265 | 0.674294438 |
| cg10584100 | ASPH;ASPH;A | 8  | 0.02394328 | 0.698581323 | 0.812805144 |
| cg26955287 | ASPSCR1     | 17 | 0.00016594 | 0.35892709  | 0.630854647 |
| cg12374579 | ASPSCR1     | 17 | 0.00043878 | 0.336087007 | 0.565699189 |
| cg14419393 | ASPSCR1     | 17 | 0.00118455 | 0.347562637 | 0.565169696 |
| cg08311321 | ASPSCR1     | 17 | 0.00078528 | 0.250463193 | 0.446862201 |
| cg22949575 | ASPSCR1     | 17 | 0.00093434 | 0.532015216 | 0.726695684 |
| cg01410415 | ASPSCR1     | 17 | 0.0005394  | 0.258230988 | 0.420193652 |
| cg02647835 | ASPSCR1     | 17 | 0.00095439 | 0.343886408 | 0.498159753 |
| cg15438211 | ASPSCR1     | 17 | 0.00253989 | 0.205498126 | 0.357145668 |
| cg06483978 | ASPSCR1     | 17 | 0.00173032 | 0.276253932 | 0.426049543 |

|            |                 |    |            |             |             |
|------------|-----------------|----|------------|-------------|-------------|
| cg11780549 | ASPSCR1         | 17 | 0.0029649  | 0.31247572  | 0.452277352 |
| cg04784499 | ASPSCR1         | 17 | 0.00053355 | 0.435743911 | 0.568671801 |
| cg09925620 | ASPSCR1         | 17 | 0.00015312 | 0.676118506 | 0.803619088 |
| cg23928512 | ASPSCR1         | 17 | 0.0258664  | 0.490040517 | 0.607682614 |
| cg05277504 | ASPSCR1         | 17 | 0.00277881 | 0.381228893 | 0.491388256 |
| cg23135546 | ASPSCR1         | 17 | 0.02649775 | 0.136109403 | 0.236955349 |
| cg14010829 | ASS1;ASS1       | 9  | 0.00157824 | 0.289627978 | 0.480584779 |
| cg14053997 | ASS1;ASS1       | 9  | 0.00976277 | 0.117538208 | 0.220028097 |
| cg13792444 | ASTN2;ASTN1     | 9  | 0.00115842 | 0.24396643  | 0.460734955 |
| cg04372436 | ATCAY           | 19 | 0.01430637 | 0.742756879 | 0.891592939 |
| cg20363931 | ATE1;ATE1       | 10 | 0.00915753 | 0.190222209 | 0.351487041 |
| cg10315420 | ATF1            | 12 | 0.01584036 | 0.663970926 | 0.801037663 |
| cg07238630 | ATG10;ATG1      | 5  | 0.00046317 | 0.512529435 | 0.712877879 |
| cg13771313 | ATG16L2         | 11 | 0.00253806 | 0.124803012 | 0.240122228 |
| cg22214498 | ATG2A           | 11 | 0.00096211 | 0.535925739 | 0.687325214 |
| cg16721106 | ATG4B;ATG4      | 2  | 0.00050349 | 0.661180642 | 0.799688868 |
| cg20707601 | ATG4B;ATG4      | 2  | 0.03269532 | 0.572108483 | 0.682395173 |
| cg05791356 | ATG7;ATG7;ATG7  | 3  | 0.01253457 | 0.698436101 | 0.799631636 |
| cg24434988 | ATHL1           | 11 | 0.01125706 | 0.44668455  | 0.617236794 |
| cg05471373 | ATM;ATM         | 11 | 0.00171446 | 0.662143548 | 0.794984297 |
| cg04770025 | ATM;ATM         | 11 | 0.02460408 | 0.79284003  | 0.910251309 |
| cg12139707 | ATM;ATM         | 11 | 0.00399459 | 0.691922572 | 0.802846298 |
| cg20006729 | ATN1            | 12 | 0.00622214 | 0.635996685 | 0.78443932  |
| cg22548551 | ATN1;ATN1       | 12 | 0.00827889 | 0.441836163 | 0.546808396 |
| cg20839205 | ATOH8           | 2  | 0.00658735 | 0.18347848  | 0.365420927 |
| cg02914235 | ATOH8           | 2  | 0.0018825  | 0.68550358  | 0.788584225 |
| cg18256640 | ATP10A          | 15 | 0.00742106 | 0.198010663 | 0.376808584 |
| cg14381255 | ATP11A;ATP11A   | 13 | 0.00641366 | 0.297262859 | 0.509325867 |
| cg06206670 | ATP11A;ATP11A   | 13 | 0.0028186  | 0.48272756  | 0.674844596 |
| cg10883123 | ATP11A;ATP11A   | 13 | 0.00378412 | 0.382444261 | 0.559981761 |
| cg19970086 | ATP11A;ATP11A   | 13 | 0.00924588 | 0.545589    | 0.687530653 |
| cg02873074 | ATP11A;ATP11A   | 13 | 0.03243493 | 0.347304691 | 0.487951478 |
| cg14649073 | ATP11A;ATP11A   | 13 | 0.01277792 | 0.352940951 | 0.491874109 |
| cg11840467 | ATP11A;ATP11A   | 13 | 0.00079396 | 0.326579935 | 0.465393287 |
| cg14737571 | ATP11A;ATP11A   | 13 | 0.00695928 | 0.493255505 | 0.627146021 |
| cg13858127 | ATP11A;ATP11A   | 13 | 0.01891034 | 0.555261748 | 0.687528152 |
| cg14864184 | ATP11A;ATP11A   | 13 | 0.04784453 | 0.52970944  | 0.641329287 |
| cg11462099 | ATP11A;ATP11A   | 13 | 0.00653093 | 0.114555818 | 0.222498625 |
| cg01233786 | ATP11A;ATP11A   | 13 | 0.00221577 | 0.611861163 | 0.713773068 |
| cg17434062 | ATP13A2;ATP13A2 | 1  | 0.01503288 | 0.280483176 | 0.429351929 |
| cg02545688 | ATP13A3         | 3  | 0.00915601 | 0.754006815 | 0.883369937 |
| cg04403423 | ATP1A1;ATP1A1   | 1  | 0.04599267 | 0.490857556 | 0.613474797 |
| cg01448881 | ATP1A2          | 1  | 0.00969289 | 0.357771988 | 0.493391397 |
| cg26009832 | ATP1B1;ATP1B1   | 1  | 0.0181069  | 0.265293903 | 0.439876831 |
| cg10436792 | ATP2A1;ATP2A1   | 16 | 0.02274929 | 0.298356257 | 0.412448272 |
| cg10095954 | ATP2A3;ATP2A3   | 17 | 0.00187332 | 0.263644595 | 0.418396106 |

|            |              |    |            |             |             |
|------------|--------------|----|------------|-------------|-------------|
| cg25599198 | ATP2A3;ATP2  | 17 | 0.02050788 | 0.243959831 | 0.352178815 |
| cg20235117 | ATP2B2;ATP2  | 3  | 0.01902456 | 0.325076158 | 0.455010135 |
| cg03956243 | ATP5G2;ATP5  | 12 | 0.01838527 | 0.15829204  | 0.303199356 |
| cg07807695 | ATP6AP1L     | 5  | 0.02662691 | 0.135734284 | 0.255916061 |
| cg05883442 | ATP6V0D1     | 16 | 0.00281305 | 0.254518269 | 0.378330841 |
| cg02286270 | ATP8A2       | 13 | 0.00266957 | 0.542796109 | 0.706317923 |
| cg17488500 | ATP8B2;ATP8  | 1  | 0.00624861 | 0.160446775 | 0.310443478 |
| cg22288309 | ATP8B4       | 15 | 0.02283703 | 0.443014793 | 0.643916039 |
| cg19566879 | ATXN1;ATXN   | 6  | 0.00210851 | 0.380078642 | 0.56422627  |
| cg26843612 | ATXN1;ATXN   | 6  | 0.02007087 | 0.393477774 | 0.569386363 |
| cg08045301 | ATXN1L;ATXI  | 16 | 0.03404188 | 0.439912585 | 0.544730001 |
| cg21829116 | ATXN7L1      | 7  | 0.01092857 | 0.518019922 | 0.643128477 |
| cg19053223 | ATXN7L1      | 7  | 0.01830147 | 0.337663897 | 0.441595756 |
| cg03199646 | ATXN7L1;ATX  | 7  | 0.00067309 | 0.627068848 | 0.748266631 |
| cg03619256 | ATXN7L1;ATX  | 7  | 0.02167715 | 0.216078817 | 0.328409638 |
| cg15873112 | ATXN7L1;ATX  | 7  | 0.00195156 | 0.74545991  | 0.847802893 |
| cg09965388 | ATXN7L3;ATX  | 17 | 0.00643881 | 0.334682659 | 0.548333803 |
| cg04601228 | AUTS2;AUTS2  | 7  | 0.00021379 | 0.274380865 | 0.562620983 |
| cg19793499 | AUTS2;AUTS2  | 7  | 0.00410845 | 0.237497993 | 0.391062736 |
| cg08474953 | AUTS2;AUTS2  | 7  | 0.00016024 | 0.660278556 | 0.8063962   |
| cg09009070 | AUTS2;AUTS2  | 7  | 0.00060261 | 0.61711428  | 0.74880582  |
| cg14797899 | AUTS2;AUTS2  | 7  | 0.02383887 | 0.37497964  | 0.5038891   |
| cg14818546 | AUTS2;AUTS2  | 7  | 0.01087168 | 0.255739851 | 0.378812368 |
| cg00012698 | AVEN         | 15 | 0.03152154 | 0.391071818 | 0.512771775 |
| cg08005093 | AXIN2        | 17 | 0.03788517 | 0.389691091 | 0.508102897 |
| cg12255061 | AXIN2        | 17 | 0.01166754 | 0.183508317 | 0.301239923 |
| cg04166638 | AZI1;AZI1    | 17 | 0.02992662 | 0.471330986 | 0.589165636 |
| cg24403487 | AZI1;AZI1    | 17 | 0.00024335 | 0.512417435 | 0.623461098 |
| cg15564207 | AZI2;AZI2;AZ | 3  | 0.00796537 | 0.579937037 | 0.730814439 |
| cg12624040 | B3GALT1;B3G  | 2  | 0.01525618 | 0.675418978 | 0.86735608  |
| cg02413326 | B3GALT5;B3G  | 21 | 0.01989189 | 0.643779386 | 0.75728997  |
| cg05532325 | B3GNT7       | 2  | 0.01118223 | 0.506349102 | 0.715611984 |
| cg03037437 | B3GNT7       | 2  | 0.00085003 | 0.351778931 | 0.487786    |
| cg09235217 | B3GNT7       | 2  | 0.00978258 | 0.664209162 | 0.775216536 |
| cg11472422 | B3GNTL1      | 17 | 0.00066277 | 0.216167405 | 0.456324297 |
| cg24962672 | B3GNTL1      | 17 | 0.00394033 | 0.372209958 | 0.56623344  |
| cg21688152 | B3GNTL1      | 17 | 0.00368531 | 0.192911398 | 0.344001525 |
| cg07200616 | B3GNTL1      | 17 | 0.00084927 | 0.131288897 | 0.267342237 |
| cg24650913 | B3GNTL1      | 17 | 0.03975753 | 0.185743716 | 0.31925667  |
| cg10820736 | B3GNTL1      | 17 | 0.04519918 | 0.215133133 | 0.345223437 |
| cg03591954 | B3GNTL1      | 17 | 0.0117937  | 0.210564397 | 0.330423516 |
| cg06745797 | B3GNTL1      | 17 | 0.00410065 | 0.347220707 | 0.463253947 |
| cg13858803 | B4GALT1      | 9  | 0.00445561 | 0.189733031 | 0.40665628  |
| cg16883145 | B9D2;TGFB1   | 19 | 0.00091316 | 0.6071453   | 0.72701456  |
| cg11523350 | BACE1;BACE1  | 11 | 0.00758789 | 0.280553858 | 0.428656917 |
| cg01923020 | BACE1;BACE1  | 11 | 0.00166356 | 0.414436126 | 0.542314182 |

|            |             |    |            |             |             |
|------------|-------------|----|------------|-------------|-------------|
| cg11559054 | BACH2;BACH  | 6  | 0.046385   | 0.285102559 | 0.429371133 |
| cg09790829 | BACH2;BACH  | 6  | 0.01097323 | 0.27826477  | 0.402108709 |
| cg17624073 | BAHCC1      | 17 | 0.00011415 | 0.158844216 | 0.304328187 |
| cg07016556 | BAHCC1      | 17 | 0.00146582 | 0.160671306 | 0.298708733 |
| cg25348105 | BAHCC1      | 17 | 0.00535461 | 0.272118662 | 0.385097    |
| cg13710969 | BAHCC1      | 17 | 0.0004166  | 0.238013174 | 0.346705255 |
| cg23532322 | BAIAP2;BAIA | 17 | 0.01588728 | 0.354292972 | 0.49988465  |
| cg09840386 | BAIAP2;BAIA | 17 | 0.0006193  | 0.227979088 | 0.443355831 |
| cg11620135 | BAIAP2;BAIA | 17 | 0.00020444 | 0.154920818 | 0.329576247 |
| cg12349181 | BAIAP2;BAIA | 17 | 0.00100722 | 0.465457297 | 0.619599692 |
| cg12475142 | BAIAP2;BAIA | 17 | 0.00405378 | 0.260565056 | 0.39701591  |
| cg03060228 | BAIAP2;BAIA | 17 | 0.00195288 | 0.72576082  | 0.847243238 |
| cg10063663 | BAIAP2;BAIA | 17 | 0.00800911 | 0.162242181 | 0.274402954 |
| cg10030684 | BAIAP2;BAIA | 17 | 0.0282882  | 0.570978417 | 0.68117552  |
| cg22184944 | BAIAP2;BAIA | 17 | 0.03059785 | 0.303424481 | 0.407392508 |
| cg02533364 | BAIAP2;BAIA | 17 | 0.03056703 | 0.61799489  | 0.718514496 |
| cg10531073 | BAIAP2L2    | 22 | 0.00179527 | 0.150314766 | 0.271541169 |
| cg17482424 | BAMBI       | 10 | 0.005363   | 0.782366498 | 0.917522295 |
| cg05762553 | BANP;BANP   | 16 | 0.00120803 | 0.299435958 | 0.50781111  |
| cg27058702 | BANP;BANP   | 16 | 0.00852492 | 0.28094273  | 0.474020973 |
| cg06374794 | BANP;BANP   | 16 | 0.02047922 | 0.358536696 | 0.524848541 |
| cg09870004 | BANP;BANP   | 16 | 0.01043166 | 0.22106068  | 0.38572993  |
| cg01256999 | BANP;BANP   | 16 | 0.00407031 | 0.663075974 | 0.793225414 |
| cg26979299 | BANP;BANP   | 16 | 0.03609563 | 0.483788444 | 0.606046406 |
| cg04081145 | BANP;BANP   | 16 | 0.00079563 | 0.593124186 | 0.708573368 |
| cg06969933 | BANP;BANP   | 16 | 0.00450863 | 0.159010281 | 0.271465305 |
| cg15647614 | BAT1;BAT1   | 6  | 0.01126334 | 0.588253352 | 0.708369424 |
| cg10851350 | BAT2        | 6  | 6.98E-05   | 0.648641659 | 0.776435488 |
| cg13267247 | BAT2        | 6  | 0.01036831 | 0.584957243 | 0.702871522 |
| cg10660666 | BAT2L1      | 9  | 0.0131134  | 0.549430729 | 0.688066635 |
| cg09144098 | BBS2        | 16 | 0.04409157 | 0.280687123 | 0.430957235 |
| cg05891572 | BBS9;BBS9;B | 7  | 0.03085304 | 0.33947158  | 0.539598185 |
| cg20299670 | BCAN        | 1  | 0.00514    | 0.43811699  | 0.72327922  |
| cg08284564 | BCAR1;BCAR  | 16 | 0.02267491 | 0.512810295 | 0.627038734 |
| cg06888900 | BCAR1;BCAR  | 16 | 0.00050336 | 0.268019037 | 0.435142584 |
| cg02853019 | BCAR1;BCAR  | 16 | 0.00889574 | 0.197343026 | 0.333156635 |
| cg21144890 | BCAS3;BCAS3 | 17 | 0.04738928 | 0.553724954 | 0.668119208 |
| cg17192381 | BCL2        | 18 | 0.01291281 | 0.51835405  | 0.630780662 |
| cg26157948 | BCL3        | 19 | 0.03043341 | 0.423325026 | 0.587330308 |
| cg03496157 | BCL7A;BCL7A | 12 | 0.00216283 | 0.481698002 | 0.582441447 |
| cg27616543 | BCL9L       | 11 | 0.00035088 | 0.510887632 | 0.640861559 |
| cg26811705 | BCL9L;BCL9L | 11 | 0.00027054 | 0.15097771  | 0.283585593 |
| cg24988451 | BDH2        | 4  | 0.00283032 | 0.754029772 | 0.86129683  |
| cg20088756 | BEGAIN;BEG  | 14 | 0.00044814 | 0.461815685 | 0.657910555 |
| cg12025832 | BEGAIN;BEG  | 14 | 0.00109578 | 0.196479791 | 0.335354843 |
| cg19883293 | BEGAIN;BEG  | 14 | 0.00969058 | 0.142623444 | 0.252637602 |

|            |              |    |            |             |             |
|------------|--------------|----|------------|-------------|-------------|
| cg01963573 | BEND3        | 6  | 0.00021379 | 0.383811718 | 0.555775216 |
| cg09317928 | BEST1;BEST1  | 11 | 0.01651302 | 0.499200178 | 0.600317103 |
| cg11562596 | BEST1;BEST1  | 11 | 0.00384589 | 0.345908082 | 0.486127606 |
| cg23591609 | BEST3        | 12 | 0.04876936 | 0.15123223  | 0.264281639 |
| cg17277939 | BEST3;BEST3  | 12 | 0.00829866 | 0.457120154 | 0.633766529 |
| cg04609640 | BEST4        | 1  | 0.03903286 | 0.458943813 | 0.55938622  |
| cg13533456 | BET3L        | 6  | 0.04450589 | 0.445498219 | 0.591726358 |
| cg18815565 | BFSP1        | 20 | 0.01254013 | 0.294707641 | 0.461820905 |
| cg18768347 | BHLHE40      | 3  | 0.00011803 | 0.216530935 | 0.384720551 |
| cg26344982 | BHLHE40      | 3  | 6.24E-05   | 0.250184972 | 0.415187588 |
| cg25629905 | BHLHE41      | 12 | 0.00234804 | 0.242987964 | 0.449905237 |
| cg01902605 | BHMT2;DMC    | 5  | 0.00172155 | 0.190078868 | 0.318058572 |
| cg21427464 | BIN1;BIN1;BI | 2  | 0.00312917 | 0.590186866 | 0.775951017 |
| cg08663425 | BIN1;BIN1;BI | 2  | 0.01503598 | 0.606802348 | 0.740398766 |
| cg24791156 | BIN3         | 8  | 0.00166148 | 0.342559704 | 0.514923278 |
| cg15270350 | BIRC5;BIRC5; | 17 | 0.00247965 | 0.175665568 | 0.345275202 |
| cg11971852 | BIRC6        | 2  | 0.03793697 | 0.155768014 | 0.279825301 |
| cg00545886 | BLCAP;BLCAF  | 20 | 0.02027981 | 0.656987882 | 0.763085067 |
| cg14579118 | BLVRA        | 7  | 0.00470667 | 0.24493734  | 0.421652813 |
| cg12616941 | BMI1         | 10 | 0.04185757 | 0.584077577 | 0.732381507 |
| cg18799284 | BMP1;BMP1;   | 8  | 0.02669059 | 0.357015937 | 0.458728388 |
| cg26665274 | BMP2         | 20 | 0.00021379 | 0.276326205 | 0.564579393 |
| cg05923197 | BMP4;BMP4;   | 14 | 0.00450088 | 0.418333104 | 0.537845075 |
| cg22023826 | BMP5         | 6  | 0.04909155 | 0.432695013 | 0.568437583 |
| cg21752295 | BMP6         | 6  | 0.00941054 | 0.687131454 | 0.819901481 |
| cg19798881 | BMP6         | 6  | 0.00904863 | 0.170097849 | 0.279802777 |
| cg25190824 | BMP8B        | 1  | 0.01874479 | 0.258348437 | 0.382622155 |
| cg15476602 | BMPR1A       | 10 | 0.00742891 | 0.311133578 | 0.481408471 |
| cg18483459 | BMPR2        | 2  | 0.04682753 | 0.18404813  | 0.285851432 |
| cg02365648 | BNIP3        | 10 | 0.00791292 | 0.229732812 | 0.429363404 |
| cg06147895 | BNIP3        | 10 | 0.00266417 | 0.209885562 | 0.377158179 |
| cg22987267 | BNIP3L       | 8  | 0.01236186 | 0.367198643 | 0.532888906 |
| cg02858625 | BOC          | 3  | 0.01019291 | 0.31904039  | 0.559556404 |
| cg15111495 | BOC          | 3  | 0.00184237 | 0.288191786 | 0.475928405 |
| cg13071869 | BOC          | 3  | 0.01794224 | 0.466327305 | 0.649745364 |
| cg25132931 | BOC          | 3  | 0.00330033 | 0.438697146 | 0.609403968 |
| cg05122957 | BOC          | 3  | 0.00716142 | 0.154762997 | 0.293923015 |
| cg13272743 | BOC          | 3  | 0.00514318 | 0.563727308 | 0.700585884 |
| cg01908177 | BOC          | 3  | 0.00151625 | 0.494541567 | 0.6273981   |
| cg14333539 | BOK          | 2  | 0.01136488 | 0.174111134 | 0.282208102 |
| cg25958911 | BOP1         | 8  | 0.04362265 | 0.596692559 | 0.75327999  |
| cg02908282 | BOP1         | 8  | 0.00266876 | 0.222140019 | 0.349295329 |
| cg15151778 | BOP1         | 8  | 0.00684934 | 0.59172134  | 0.715408594 |
| cg06354558 | BOP1         | 8  | 0.00280319 | 0.781202625 | 0.89904918  |
| cg16929012 | BPHL;BPHL;B  | 6  | 0.00010163 | 0.536724302 | 0.738699587 |
| cg01294253 | BRD3         | 9  | 0.00866741 | 0.228233311 | 0.374223303 |

|            |              |    |            |             |             |
|------------|--------------|----|------------|-------------|-------------|
| cg03657791 | BRD4         | 19 | 0.00905266 | 0.62761297  | 0.756030927 |
| cg26771969 | BRD4;BRD4    | 19 | 0.00041304 | 0.170439569 | 0.280607158 |
| cg19559114 | BRD4;BRD4    | 19 | 0.00062721 | 0.423298832 | 0.52930453  |
| cg00470044 | BRE;BRE;BRE  | 2  | 0.00399603 | 0.203578021 | 0.347940193 |
| cg17862837 | BRE;BRE;BRE  | 2  | 0.01060429 | 0.542902731 | 0.649364835 |
| cg01446612 | BRI3BP       | 12 | 0.02604003 | 0.262813671 | 0.439159317 |
| cg15161050 | BRI3BP       | 12 | 0.03708194 | 0.568178558 | 0.684811292 |
| cg15549767 | BRIP1        | 17 | 0.02030717 | 0.755447634 | 0.86628624  |
| cg26214765 | BRP44L       | 6  | 0.03320739 | 0.335436743 | 0.447219434 |
| cg24351452 | BRSK1        | 19 | 0.00084676 | 0.483276606 | 0.671899902 |
| cg24206507 | BRSK2        | 11 | 0.00238549 | 0.486377852 | 0.69295053  |
| cg19977004 | BRSK2        | 11 | 0.00097827 | 0.446573504 | 0.597877878 |
| cg10002860 | BRSK2        | 11 | 0.00584138 | 0.346649933 | 0.488221607 |
| cg05551792 | BRSK2        | 11 | 0.01402609 | 0.308097448 | 0.436501572 |
| cg13535416 | BRSK2        | 11 | 0.00509558 | 0.695711398 | 0.820178247 |
| cg03233876 | BSG;BSG;BSC  | 19 | 0.00481959 | 0.133228018 | 0.248232924 |
| cg12152068 | BSN          | 3  | 0.01718386 | 0.447853163 | 0.605822039 |
| cg21757872 | BTBD11;BTBI  | 12 | 0.00499988 | 0.153515453 | 0.300410827 |
| cg21500895 | BTBD11;BTBI  | 12 | 0.00102382 | 0.269487901 | 0.413176247 |
| cg13935577 | BTBD11;BTBI  | 12 | 0.00186273 | 0.293698684 | 0.40733964  |
| cg00530688 | BTBD11;BTBI  | 12 | 0.00334417 | 0.736540884 | 0.837996476 |
| cg06094113 | BTBD18       | 11 | 0.00302894 | 0.263488991 | 0.445939578 |
| cg06766016 | BTBD19       | 1  | 0.02010885 | 0.468837519 | 0.589987697 |
| cg25688060 | BTBD3        | 20 | 0.03299867 | 0.527208407 | 0.642007082 |
| cg13442386 | BTBD9;BTBD   | 6  | 0.00138968 | 0.508265835 | 0.67559373  |
| cg00978102 | BTNL2        | 6  | 0.00367951 | 0.686818783 | 0.787445768 |
| cg26002437 | C10orf10;RA  | 10 | 0.00802616 | 0.302934118 | 0.427529401 |
| cg11914795 | C10orf107    | 10 | 0.0008505  | 0.188208356 | 0.351016805 |
| cg14207539 | C10orf11     | 10 | 0.00626149 | 0.545791398 | 0.704341302 |
| cg23264016 | C10orf11     | 10 | 0.00035088 | 0.343747643 | 0.496437665 |
| cg24280832 | C10orf11     | 10 | 0.01274808 | 0.29647664  | 0.428830372 |
| cg01140247 | C10orf11     | 10 | 0.01455944 | 0.31172503  | 0.436538683 |
| cg05496768 | C10orf11     | 10 | 0.04862525 | 0.638018012 | 0.751670915 |
| cg17238009 | C10orf11;C10 | 10 | 0.01174653 | 0.408895828 | 0.542449994 |
| cg06103397 | C10orf11;C10 | 10 | 0.02041879 | 0.318193871 | 0.42489731  |
| cg17502312 | C10orf18     | 10 | 0.0017987  | 0.211992712 | 0.404827297 |
| cg09411597 | C10orf18     | 10 | 0.03400092 | 0.331196171 | 0.479970869 |
| cg08571020 | C10orf62;DH  | 10 | 0.0002184  | 0.669960869 | 0.812641978 |
| cg24197051 | C10orf62;DH  | 10 | 0.00083907 | 0.521950917 | 0.626235756 |
| cg08732300 | C10orf71;C10 | 10 | 0.01396978 | 0.210237516 | 0.328548372 |
| cg10775039 | C10orf71;C10 | 10 | 0.02020228 | 0.300459584 | 0.469685196 |
| cg18895336 | C10orf72     | 10 | 0.00088739 | 0.409913315 | 0.571566031 |
| cg07260003 | C10orf72;C10 | 10 | 0.0057728  | 0.164993344 | 0.276310137 |
| cg18286127 | C10orf84;C10 | 10 | 0.00035603 | 0.255266952 | 0.493340144 |
| cg24082249 | C11orf30     | 11 | 0.0267679  | 0.400594992 | 0.552730846 |
| cg25422051 | C11orf68;C10 | 11 | 0.00138968 | 0.299264937 | 0.413688347 |

|            |                     |    |            |             |             |
|------------|---------------------|----|------------|-------------|-------------|
| cg03505797 | C11orf84            | 11 | 0.00137675 | 0.772659374 | 0.884151636 |
| cg06579738 | C11orf92            | 11 | 0.01274323 | 0.457791358 | 0.616243655 |
| cg27475923 | C11orf95            | 11 | 0.00015494 | 0.276035662 | 0.442712093 |
| cg04686545 | C12orf23            | 12 | 0.01229094 | 0.267058903 | 0.433749701 |
| cg10082647 | C12orf23            | 12 | 0.00247796 | 0.267883667 | 0.377195904 |
| cg00019678 | C12orf34            | 12 | 0.00581404 | 0.137435802 | 0.300166637 |
| cg19879537 | C12orf34            | 12 | 0.04533001 | 0.597660279 | 0.710466446 |
| cg06252530 | C12orf49            | 12 | 0.00066484 | 0.260587677 | 0.453155511 |
| cg19214184 | C12orf51            | 12 | 0.00331275 | 0.175703355 | 0.297129259 |
| cg03061518 | C12orf65;C11orf10   | 12 | 0.0029676  | 0.176656972 | 0.331471797 |
| cg11727592 | C13orf18            | 13 | 0.00114712 | 0.426592882 | 0.533972136 |
| cg10664305 | C13orf30            | 13 | 0.00884438 | 0.574492324 | 0.680888317 |
| cg17923947 | C14orf138;SOL1orf1  | 14 | 0.04407341 | 0.481559507 | 0.60702943  |
| cg05019583 | C14orf143           | 14 | 0.00082819 | 0.681365377 | 0.80607062  |
| cg10297617 | C14orf159;C14orf158 | 14 | 0.01238904 | 0.099754333 | 0.217979823 |
| cg16220513 | C14orf166           | 14 | 0.03842375 | 0.711024875 | 0.814462624 |
| cg00780666 | C14orf179;C14orf178 | 14 | 0.03844795 | 0.422943381 | 0.579369276 |
| cg08258506 | C14orf43            | 14 | 0.02303894 | 0.235327451 | 0.395940651 |
| cg24128590 | C14orf43;C14orf42   | 14 | 0.00060633 | 0.259159657 | 0.473698646 |
| cg23938483 | C14orf43;C14orf42   | 14 | 0.00111203 | 0.478724175 | 0.674224012 |
| cg21032266 | C14orf43;C14orf42   | 14 | 0.00556435 | 0.436822887 | 0.610880417 |
| cg12861771 | C15orf27            | 15 | 0.00017261 | 0.57392709  | 0.730045688 |
| cg03536657 | C15orf28;AN1orf1    | 15 | 0.00963442 | 0.494593927 | 0.627807457 |
| cg01024668 | C15orf28;AN1orf1    | 15 | 0.01116179 | 0.589822799 | 0.707970294 |
| cg20352178 | C15orf28;AN1orf1    | 15 | 0.01141756 | 0.607346371 | 0.712060076 |
| cg27211935 | C15orf39            | 15 | 0.00215655 | 0.580396161 | 0.747493408 |
| cg22017146 | C15orf39            | 15 | 0.01056705 | 0.618653443 | 0.727135328 |
| cg20602300 | C15orf57;C14orf179  | 15 | 0.00144607 | 0.479949302 | 0.694069663 |
| cg17140476 | C15orf57;C14orf179  | 15 | 0.00581404 | 0.371055673 | 0.563749449 |
| cg09303678 | C16orf11            | 16 | 0.00644394 | 0.298376443 | 0.433960887 |
| cg02642565 | C16orf5             | 16 | 0.00550387 | 0.110548519 | 0.228240224 |
| cg08496964 | C16orf68            | 16 | 0.00736526 | 0.514234331 | 0.63789799  |
| cg26923629 | C16orf71            | 16 | 0.00434532 | 0.190823407 | 0.380337105 |
| cg26967566 | C16orf74            | 16 | 3.77E-05   | 0.361261535 | 0.538234125 |
| cg04558424 | C16orf74            | 16 | 0.00025648 | 0.32092866  | 0.489855276 |
| cg27063540 | C16orf89;C16orf88   | 16 | 0.00618742 | 0.519376919 | 0.623133724 |
| cg25657222 | C17orf100;MIR4467   | 17 | 0.04215874 | 0.61108156  | 0.741526185 |
| cg01248855 | C17orf42            | 17 | 0.04205143 | 0.620921445 | 0.775982746 |
| cg11494841 | C17orf62;C17orf61   | 17 | 0.01905044 | 0.246919207 | 0.401816515 |
| cg09913183 | C17orf65;AS1orf1    | 17 | 0.03162152 | 0.655785366 | 0.814593526 |
| cg25309567 | C17orf70;C17orf69   | 17 | 0.0003561  | 0.35500142  | 0.535590143 |
| cg02698731 | C17orf70;C17orf69   | 17 | 0.0033967  | 0.448854604 | 0.57121285  |
| cg26421997 | C17orf79            | 17 | 0.00158276 | 0.540812517 | 0.665938518 |
| cg21737421 | C18orf1;C18orf2     | 18 | 0.00193717 | 0.487992823 | 0.690867417 |
| cg23508887 | C18orf1;C18orf2     | 18 | 0.01819683 | 0.080244293 | 0.21144227  |
| cg24780966 | C18orf1;C18orf2     | 18 | 0.00168588 | 0.359186306 | 0.596261363 |

|            |              |    |            |             |             |
|------------|--------------|----|------------|-------------|-------------|
| cg27107110 | C18orf1;C18o | 18 | 0.00564265 | 0.455802399 | 0.570209695 |
| cg08233331 | C18orf2;C18o | 18 | 0.03484004 | 0.668303573 | 0.787088755 |
| cg16206090 | C18orf45     | 18 | 0.02657828 | 0.139384878 | 0.256529323 |
| cg02644867 | C19orf23;CIR | 19 | 0.00349705 | 0.283656577 | 0.394382971 |
| cg14558880 | C19orf23;CIR | 19 | 0.00046123 | 0.415261373 | 0.518717634 |
| cg23357435 | C19orf26     | 19 | 3.77E-05   | 0.553675297 | 0.74546335  |
| cg18547849 | C19orf28;C19 | 19 | 0.00419429 | 0.234544523 | 0.349819538 |
| cg07946961 | C19orf34;CSI | 19 | 0.01132204 | 0.336882644 | 0.486876032 |
| cg27345346 | C19orf55     | 19 | 0.00265786 | 0.354001045 | 0.507655893 |
| cg07207742 | C19orf6;C19o | 19 | 0.02547853 | 0.491541252 | 0.608246337 |
| cg09516958 | C19orf6;C19o | 19 | 0.02341062 | 0.562285609 | 0.669834879 |
| cg00570088 | C19orf6;C19o | 19 | 0.00315502 | 0.669580512 | 0.773420002 |
| cg17344770 | C19orf71     | 19 | 0.00051973 | 0.315062379 | 0.54705509  |
| cg06666376 | C19orf77     | 19 | 0.01654557 | 0.373916247 | 0.49130443  |
| cg07720789 | C1orf105;PIC | 1  | 0.02553199 | 0.509037564 | 0.615380941 |
| cg17131183 | C1orf113;C1o | 1  | 0.02444603 | 0.281051455 | 0.439701353 |
| cg19373545 | C1orf113;C1o | 1  | 0.00239793 | 0.262323709 | 0.384661614 |
| cg15926004 | C1orf133;SEF | 1  | 0.02477796 | 0.125398572 | 0.264868764 |
| cg20433455 | C1orf144;C1o | 1  | 0.00363616 | 0.353786953 | 0.482344142 |
| cg23812948 | C1orf159     | 1  | 0.00625881 | 0.405071706 | 0.616343231 |
| cg01722868 | C1orf161     | 1  | 0.00618894 | 0.418421801 | 0.619937715 |
| cg11782208 | C1orf170     | 1  | 0.00052764 | 0.410136993 | 0.510509765 |
| cg27446570 | C1orf174     | 1  | 0.00217814 | 0.221399061 | 0.427259648 |
| cg14853231 | C1orf174     | 1  | 0.0066766  | 0.357620253 | 0.473146799 |
| cg15324917 | C1orf198;C1o | 1  | 0.00937016 | 0.140349768 | 0.310782331 |
| cg26872588 | C1orf198;C1o | 1  | 0.00152032 | 0.135203171 | 0.249660616 |
| cg21777154 | C1orf21      | 1  | 0.00042618 | 0.480088743 | 0.694074619 |
| cg07582892 | C1orf21      | 1  | 0.03561143 | 0.314052088 | 0.486210212 |
| cg11855643 | C1orf21      | 1  | 0.00101776 | 0.509903337 | 0.658103417 |
| cg12550731 | C1orf21      | 1  | 0.00870582 | 0.269487777 | 0.37851828  |
| cg09462269 | C1orf210;C1o | 1  | 0.03473304 | 0.31597356  | 0.418129388 |
| cg15644413 | C1orf216     | 1  | 5.03E-05   | 0.412084048 | 0.589908672 |
| cg21817668 | C1orf53      | 1  | 0.02188465 | 0.648721083 | 0.76668512  |
| cg27528222 | C1orf86      | 1  | 0.00308431 | 0.319729352 | 0.431833373 |
| cg08933000 | C1orf86;LOC  | 1  | 0.03560942 | 0.477147175 | 0.608329064 |
| cg11503104 | C1orf86;LOC  | 1  | 0.00688465 | 0.465409411 | 0.569152091 |
| cg02636585 | C1orf9;C1orf | 1  | 0.00583646 | 0.776500708 | 0.900715371 |
| cg21582311 | C1orf96      | 1  | 0.00012312 | 0.232184045 | 0.501010648 |
| cg13659928 | C1QTNF1;C1o  | 17 | 0.01477505 | 0.567527112 | 0.706500617 |
| cg25330016 | C1QTNF1;C1o  | 17 | 0.04920939 | 0.122400723 | 0.24912817  |
| cg03934354 | C1QTNF3;C1o  | 5  | 0.01383562 | 0.142567837 | 0.298972444 |
| cg18356785 | C1QTNF4      | 11 | 0.00047393 | 0.197936806 | 0.353453434 |
| cg09250458 | C1QTNF8      | 16 | 0.00462236 | 0.137241069 | 0.262249513 |
| cg02726898 | C1QTNF8      | 16 | 0.00798031 | 0.243686237 | 0.367498076 |
| cg09695996 | C1QTNF8      | 16 | 0.03557224 | 0.335053866 | 0.436827022 |
| cg10224476 | C1QTNF8      | 16 | 0.00074104 | 0.250373315 | 0.35117548  |



|            |              |    |            |             |             |
|------------|--------------|----|------------|-------------|-------------|
| cg09576649 | C20orf112    | 20 | 0.01066178 | 0.556235422 | 0.67539742  |
| cg16125816 | C20orf117;C: | 20 | 0.02002767 | 0.65294709  | 0.784553985 |
| cg03904630 | C20orf117;C: | 20 | 0.0221624  | 0.635323443 | 0.759130814 |
| cg02182210 | C20orf160    | 20 | 0.00069853 | 0.211893489 | 0.374267795 |
| cg09203029 | C20orf20     | 20 | 7.39E-05   | 0.147696708 | 0.428685265 |
| cg05097899 | C20orf30;C2: | 20 | 0.00477326 | 0.202066814 | 0.375206409 |
| cg23736024 | C21orf121    | 21 | 0.00032077 | 0.553595239 | 0.71899209  |
| cg10569414 | C21orf121    | 21 | 0.00018021 | 0.466049734 | 0.579307517 |
| cg12947009 | C21orf2      | 21 | 0.00105928 | 0.344699226 | 0.456955561 |
| cg25726756 | C21orf56;C2: | 21 | 0.04865038 | 0.440655699 | 0.589578577 |
| cg19902195 | C21orf67;C2: | 21 | 0.0012818  | 0.392771945 | 0.620122139 |
| cg06684407 | C21orf67;C2: | 21 | 0.00197437 | 0.283052667 | 0.484084644 |
| cg10007534 | C21orf70     | 21 | 0.01240349 | 0.36991601  | 0.52283451  |
| cg05054998 | C21orf70     | 21 | 0.00742961 | 0.258260535 | 0.391755148 |
| cg14723284 | C21orf70     | 21 | 0.04396442 | 0.067620065 | 0.170272643 |
| cg06787912 | C21orf82;C2: | 21 | 0.02210502 | 0.268681244 | 0.477307213 |
| cg12003230 | C21orf84     | 21 | 0.00663484 | 0.318588244 | 0.536578149 |
| cg01042983 | C22orf25     | 22 | 0.0038687  | 0.496270845 | 0.597581679 |
| cg18034295 | C22orf32;FAI | 22 | 0.00758466 | 0.17073804  | 0.270821884 |
| cg15223899 | C22orf45;C2: | 22 | 0.01058405 | 0.324695944 | 0.459551786 |
| cg09246479 | C22orf45;C2: | 22 | 0.00807264 | 0.240129045 | 0.360286197 |
| cg21423557 | C2orf3       | 2  | 0.00401712 | 0.646430102 | 0.771194766 |
| cg01169075 | C2orf34      | 2  | 0.01814858 | 0.553998233 | 0.659076127 |
| cg25819429 | C2orf48      | 2  | 0.00081785 | 0.324442347 | 0.455468351 |
| cg09516237 | C2orf48      | 2  | 0.04272806 | 0.479298898 | 0.603275237 |
| cg02061967 | C2orf48      | 2  | 0.0110047  | 0.568619117 | 0.677007909 |
| cg12789935 | C2orf54;C2o: | 2  | 0.00014645 | 0.204437996 | 0.383286222 |
| cg09994035 | C2orf54;C2o: | 2  | 0.00024734 | 0.316172142 | 0.491754247 |
| cg16171392 | C2orf54;C2o: | 2  | 0.00042483 | 0.573751447 | 0.730803436 |
| cg08517455 | C2orf55      | 2  | 0.00219423 | 0.525095363 | 0.660513614 |
| cg10481134 | C2orf58      | 2  | 0.04320972 | 0.281120424 | 0.467151928 |
| cg04809904 | C2orf62      | 2  | 0.00287222 | 0.546886892 | 0.654715409 |
| cg16083447 | C2orf64;UNC  | 2  | 0.01030429 | 0.382176194 | 0.532832307 |
| cg24478803 | C2orf70      | 2  | 0.00505472 | 0.213885061 | 0.319535883 |
| cg25114245 | C2orf81      | 2  | 0.02748848 | 0.218627064 | 0.323579345 |
| cg04276057 | C2orf82      | 2  | 0.00497072 | 0.188451343 | 0.301261959 |
| cg13047596 | C2orf82;C2o: | 2  | 0.00238823 | 0.418902567 | 0.533628547 |
| cg09491709 | C3orf20      | 3  | 0.02452391 | 0.628750642 | 0.755705077 |
| cg06436504 | C3orf26;C3o: | 3  | 0.00220673 | 0.515587586 | 0.648979939 |
| cg00447769 | C3orf62      | 3  | 0.02435853 | 0.669768327 | 0.790114733 |
| cg22690884 | C3orf74      | 3  | 0.00079924 | 0.498612515 | 0.652396876 |
| cg26044340 | C4BPA        | 1  | 0.01361717 | 0.441594703 | 0.629231448 |
| cg26430305 | C4BPA        | 1  | 0.04099899 | 0.194669235 | 0.315361283 |
| cg26514552 | C4BPA        | 1  | 0.03310212 | 0.181183352 | 0.282257182 |
| cg14740771 | C4BPB;C4BP:  | 1  | 0.01373923 | 0.186565175 | 0.352808643 |
| cg06005199 | C4orf23      | 4  | 0.00011804 | 0.479534738 | 0.713379869 |

|            |                   |   |            |             |             |
|------------|-------------------|---|------------|-------------|-------------|
| cg11036672 | C4orf23           | 4 | 0.00025065 | 0.209443094 | 0.384337151 |
| cg09774649 | C4orf23           | 4 | 0.00165587 | 0.134563207 | 0.279612157 |
| cg27160141 | C4orf23           | 4 | 0.0283446  | 0.748436758 | 0.871126578 |
| cg23210109 | C4orf44;C4orf44   | 4 | 7.39E-05   | 0.336833164 | 0.541316956 |
| cg15466157 | C4orf44;C4orf44   | 4 | 0.00134773 | 0.74303563  | 0.878926913 |
| cg16913361 | C4orf44;C4orf44   | 4 | 0.00230169 | 0.1986629   | 0.30155003  |
| cg01283202 | C4orf45           | 4 | 0.00217219 | 0.634747529 | 0.738012005 |
| cg15841665 | C4orf50           | 4 | 0.04164698 | 0.619312896 | 0.725098272 |
| cg03877829 | C5orf13;C5orf13   | 5 | 0.01499231 | 0.134650747 | 0.248952433 |
| cg01242977 | C5orf13;C5orf13   | 5 | 0.00082523 | 0.505321498 | 0.645784935 |
| cg01860693 | C5orf32           | 5 | 0.02504535 | 0.152103367 | 0.263558689 |
| cg08927631 | C5orf33;C5orf33   | 5 | 0.04017205 | 0.360270554 | 0.495252136 |
| cg18355464 | C5orf36           | 5 | 0.00222195 | 0.746136682 | 0.86295343  |
| cg05432322 | C5orf45;C5orf45   | 5 | 0.01559314 | 0.349483757 | 0.468020902 |
| cg00508855 | C5orf45;C5orf45   | 5 | 0.02701378 | 0.29158692  | 0.403816511 |
| cg01035170 | C5orf49           | 5 | 0.01054056 | 0.165817982 | 0.273135835 |
| cg11976616 | C6;C6             | 5 | 0.00693639 | 0.658165032 | 0.804621929 |
| cg17282428 | C6orf103          | 6 | 0.02707669 | 0.789874943 | 0.895380699 |
| cg02917603 | C6orf129          | 6 | 0.00424467 | 0.277259795 | 0.406284404 |
| cg13011452 | C6orf136;C6orf136 | 6 | 0.00030197 | 0.311623093 | 0.426110254 |
| cg07241170 | C6orf145          | 6 | 0.00975369 | 0.221496321 | 0.385646071 |
| cg19117070 | C6orf145          | 6 | 0.00078802 | 0.539603464 | 0.689869501 |
| cg13617837 | C6orf145          | 6 | 0.00827642 | 0.113160777 | 0.217448835 |
| cg00786256 | C6orf147          | 6 | 0.00650363 | 0.708157886 | 0.84656436  |
| cg24756966 | C6orf154          | 6 | 0.00073719 | 0.550532213 | 0.673497089 |
| cg11523799 | C6orf154;YIP      | 6 | 0.00029745 | 0.451341231 | 0.638384621 |
| cg17767198 | C6orf170          | 6 | 0.00595159 | 0.735491007 | 0.871719662 |
| cg05678462 | C6orf195          | 6 | 0.00760079 | 0.133707506 | 0.243795004 |
| cg16672203 | C6orf27           | 6 | 0.03216454 | 0.518427423 | 0.642218228 |
| cg12554290 | C6orf62           | 6 | 0.02678309 | 0.71678715  | 0.827040801 |
| cg21032074 | C6orf94           | 6 | 0.0004758  | 0.194877631 | 0.487781647 |
| cg21863721 | C6orf94;LTV1      | 6 | 0.00483417 | 0.68026504  | 0.807226381 |
| cg04099158 | C7orf10           | 7 | 0.03667568 | 0.160771338 | 0.342126377 |
| cg11177223 | C7orf20           | 7 | 0.001675   | 0.310079813 | 0.505771856 |
| cg25795026 | C7orf20           | 7 | 0.00023183 | 0.211789788 | 0.37812119  |
| cg24921614 | C7orf20           | 7 | 0.00088894 | 0.42237349  | 0.542061403 |
| cg19837815 | C7orf29;LRRK1     | 7 | 0.01113153 | 0.275524402 | 0.395032587 |
| cg09526129 | C7orf50;C7orf50   | 7 | 0.00022734 | 0.607462946 | 0.866038311 |
| cg21255128 | C7orf50;C7orf50   | 7 | 0.00022274 | 0.390433575 | 0.606414937 |
| cg16542356 | C7orf50;C7orf50   | 7 | 0.04993994 | 0.581027379 | 0.773194172 |
| cg00364696 | C7orf50;C7orf50   | 7 | 0.0075062  | 0.447771415 | 0.630781815 |
| cg08081346 | C7orf50;C7orf50   | 7 | 1.85E-05   | 0.429772781 | 0.610954074 |
| cg11360546 | C7orf50;C7orf50   | 7 | 0.00081421 | 0.461598593 | 0.636557372 |
| cg07153868 | C7orf50;C7orf50   | 7 | 0.00118022 | 0.415716848 | 0.570239901 |
| cg01343703 | C7orf50;C7orf50   | 7 | 0.00340274 | 0.564786931 | 0.718867709 |
| cg14420668 | C7orf50;C7orf50   | 7 | 0.00117067 | 0.341245576 | 0.483065716 |

|            |             |    |            |             |             |
|------------|-------------|----|------------|-------------|-------------|
| cg01687997 | C7orf50;C7o | 7  | 0.00799576 | 0.481813782 | 0.615928143 |
| cg03317820 | C7orf50;C7o | 7  | 0.0004602  | 0.123213699 | 0.256838364 |
| cg08973950 | C7orf50;C7o | 7  | 0.04957816 | 0.257665516 | 0.388130139 |
| cg04498913 | C7orf50;C7o | 7  | 0.00078633 | 0.401063938 | 0.529604993 |
| cg02696561 | C7orf50;C7o | 7  | 0.00175762 | 0.674167391 | 0.798129928 |
| cg02332902 | C7orf50;C7o | 7  | 0.00427162 | 0.819889248 | 0.926036489 |
| cg08472276 | C7orf50;GPE | 7  | 0.03547733 | 0.392511894 | 0.522841682 |
| cg08626653 | C7orf51     | 7  | 0.00211396 | 0.257528127 | 0.417726256 |
| cg24777710 | C7orf54;SND | 7  | 0.02785207 | 0.452403513 | 0.628078466 |
| cg11742898 | C7orf54;SND | 7  | 0.03917133 | 0.15760693  | 0.312847416 |
| cg11869184 | C7orf61     | 7  | 0.00060502 | 0.631604309 | 0.759027613 |
| cg01814565 | C8orf34     | 8  | 0.04119663 | 0.341552172 | 0.488246276 |
| cg00280504 | C8orf34;C8o | 8  | 0.01184607 | 0.742842646 | 0.844144121 |
| cg06890415 | C8orf46     | 8  | 0.0330201  | 0.167451867 | 0.287121398 |
| cg04473280 | C9orf25     | 9  | 0.00754937 | 0.246617247 | 0.355402252 |
| cg00193947 | C9orf27     | 9  | 0.01514773 | 0.690336561 | 0.808416235 |
| cg00542880 | C9orf3      | 9  | 0.00096163 | 0.430718375 | 0.61432324  |
| cg13402635 | C9orf3      | 9  | 0.01322565 | 0.128092339 | 0.304833334 |
| cg13853813 | C9orf3      | 9  | 0.0124988  | 0.201515542 | 0.364054221 |
| cg13972491 | C9orf3      | 9  | 0.00018563 | 0.2736007   | 0.427191585 |
| cg14503441 | C9orf3      | 9  | 0.00106154 | 0.578317677 | 0.727902326 |
| cg14601621 | C9orf3      | 9  | 0.00034463 | 0.310143456 | 0.454752766 |
| cg21189849 | C9orf3      | 9  | 0.02442442 | 0.396521892 | 0.514002425 |
| cg09951047 | C9orf3;MIR2 | 9  | 0.00015312 | 0.150737627 | 0.265258247 |
| cg07763768 | C9orf45     | 9  | 0.02913528 | 0.131531957 | 0.25821719  |
| cg14215338 | C9orf50     | 9  | 0.01200226 | 0.296378659 | 0.40387754  |
| cg06788565 | C9orf69     | 9  | 0.00116875 | 0.221117862 | 0.38514107  |
| cg14224203 | C9orf86;C9o | 9  | 0.00189775 | 0.188768139 | 0.296826936 |
| cg06557985 | CA10;CA10;C | 17 | 0.00701584 | 0.568258048 | 0.730997499 |
| cg06948222 | CA5A        | 16 | 0.00057344 | 0.379550041 | 0.527993897 |
| cg02190618 | CA5A        | 16 | 0.03948226 | 0.470636435 | 0.585886235 |
| cg25919221 | CA6         | 1  | 0.0216631  | 0.367668211 | 0.542204321 |
| cg04874511 | CAB39L;CAB  | 13 | 0.00038472 | 0.500366037 | 0.702767247 |
| cg21157446 | CABC1       | 1  | 0.00352088 | 0.316511221 | 0.468519928 |
| cg13572638 | CABC1       | 1  | 0.00050351 | 0.552514515 | 0.652660001 |
| cg27440150 | CABIN1      | 22 | 0.00021901 | 0.478077681 | 0.660382238 |
| cg22804358 | CABIN1      | 22 | 0.0109863  | 0.164845465 | 0.283379149 |
| cg18793086 | CABLES1;CAE | 18 | 0.03813861 | 0.18044777  | 0.360168934 |
| cg24964110 | CABLES1;CAE | 18 | 0.01935606 | 0.118589573 | 0.242420912 |
| cg01379171 | CABLES2     | 20 | 0.00628873 | 0.379994927 | 0.5549222   |
| cg25021456 | CACHD1      | 1  | 0.04393657 | 0.73864271  | 0.853153149 |
| cg17574877 | CACNA1C;CA  | 12 | 0.03255375 | 0.20239849  | 0.332623656 |
| cg10517230 | CACNA1G;CA  | 17 | 0.00776045 | 0.22486022  | 0.383676171 |
| cg19075717 | CACNA1G;CA  | 17 | 0.0226944  | 0.375742188 | 0.488932775 |
| cg07990390 | CACNA1H;CA  | 16 | 0.00409679 | 0.251192492 | 0.379926056 |
| cg24426822 | CACNA2D1    | 7  | 0.03513705 | 0.522615213 | 0.629820965 |

|            |               |    |            |             |             |
|------------|---------------|----|------------|-------------|-------------|
| cg14585054 | CACNB1;CAC    | 17 | 0.00284217 | 0.175923035 | 0.382949748 |
| cg15828524 | CACNB3        | 12 | 0.00427162 | 0.50736444  | 0.657799931 |
| cg18055623 | CACNG8;MIR    | 19 | 0.00060628 | 0.213389782 | 0.332769267 |
| cg07785717 | CACNG8;MIR    | 19 | 0.00806754 | 0.279755894 | 0.380406248 |
| cg03472610 | CADM2;CADI    | 3  | 0.00776757 | 0.566154177 | 0.736218241 |
| cg15253604 | CADPS;CADP    | 3  | 0.00161707 | 0.240691637 | 0.359376527 |
| cg03625918 | CADPS;CADP    | 3  | 0.01049307 | 0.187757167 | 0.297629091 |
| cg11425149 | CALD1;CALD1   | 7  | 0.00837084 | 0.178828841 | 0.38574832  |
| cg08942004 | CALHM3        | 10 | 0.03500038 | 0.50771777  | 0.622634183 |
| cg09707038 | CALM2         | 2  | 0.04972254 | 0.496564409 | 0.615176744 |
| cg15819352 | CALML6        | 1  | 0.00775251 | 0.4055805   | 0.537922788 |
| cg19513232 | CAMK2A;CAMK2  | 5  | 0.00182237 | 0.292315719 | 0.43371083  |
| cg05379597 | CAMK2G;CAMK2  | 10 | 0.0052358  | 0.150257634 | 0.262344327 |
| cg25834768 | CAMKK1;CAMK2  | 17 | 0.00861243 | 0.269497255 | 0.41964352  |
| cg13839391 | CAMKK2;CAMK2  | 12 | 0.00561549 | 0.409035844 | 0.514092097 |
| cg01643090 | CAMTA1        | 1  | 0.00098798 | 0.570636669 | 0.726338964 |
| cg01912298 | CAMTA2;CAMTA1 | 17 | 0.01425333 | 0.248253298 | 0.388262827 |
| cg24848339 | CAND2;CANDEL  | 3  | 0.00392583 | 0.473820149 | 0.639972479 |
| cg27090078 | CAPG          | 2  | 0.00051439 | 0.462921302 | 0.642720607 |
| cg10664272 | CAPG          | 2  | 0.03615665 | 0.296618114 | 0.419581774 |
| cg04962005 | CAPN1         | 11 | 0.00032917 | 0.261978456 | 0.453845354 |
| cg06970290 | CAPN1         | 11 | 0.00086149 | 0.485780127 | 0.659571187 |
| cg09620688 | CAPN1         | 11 | 0.00297351 | 0.295219122 | 0.441915769 |
| cg13762244 | CAPN1         | 11 | 0.00297362 | 0.184695261 | 0.287620988 |
| cg16615776 | CAPN10;CAPN10 | 2  | 8.30E-05   | 0.298064736 | 0.579005879 |
| cg14086599 | CAPN10;CAPN10 | 2  | 0.0001566  | 0.190754961 | 0.370314873 |
| cg01712700 | CAPN10;CAPN10 | 2  | 0.00177905 | 0.238067953 | 0.408623423 |
| cg10078335 | CAPN10;CAPN10 | 2  | 3.77E-05   | 0.407895666 | 0.52995971  |
| cg24712395 | CAPN12        | 19 | 0.02936798 | 0.365584605 | 0.479276923 |
| cg22428691 | CAPN2;CAPN10  | 1  | 0.00022415 | 0.537316539 | 0.657205761 |
| cg04652208 | CAPN8         | 1  | 0.00054394 | 0.390714215 | 0.654505528 |
| cg19807694 | CAPN8         | 1  | 0.02834939 | 0.277866774 | 0.427704425 |
| cg27235315 | CAPN8         | 1  | 0.03542775 | 0.522978044 | 0.645483198 |
| cg15119640 | CAPN8         | 1  | 0.01882788 | 0.480512596 | 0.594646026 |
| cg13545089 | CAPS;CAPS     | 19 | 4.96E-05   | 0.444592379 | 0.627756583 |
| cg07535740 | CAPS;CAPS     | 19 | 0.00048175 | 0.241883829 | 0.395227201 |
| cg12763668 | CAPZB         | 1  | 0.01109755 | 0.165538552 | 0.33138122  |
| cg17786902 | CAPZB         | 1  | 0.03283677 | 0.230192955 | 0.370290325 |
| cg03534655 | CARD11        | 7  | 0.03894749 | 0.605106115 | 0.712521315 |
| cg13855862 | CARD14        | 17 | 0.01864022 | 0.72733214  | 0.830785534 |
| cg14035368 | CARD9;CARD9   | 9  | 0.00107366 | 0.266563988 | 0.404278094 |
| cg00853853 | CARD9;CARD9   | 9  | 0.01098557 | 0.344993366 | 0.471966349 |
| cg10279148 | CARHSP1;CARD9 | 16 | 0.03731998 | 0.36963483  | 0.508171377 |
| cg17155330 | CARKD         | 13 | 0.00424077 | 0.612744116 | 0.769908275 |
| cg25709335 | CARKD         | 13 | 0.01960128 | 0.516503418 | 0.655332462 |
| cg21664614 | CARKD         | 13 | 9.78E-05   | 0.459462433 | 0.597321741 |

|            |             |    |            |             |             |
|------------|-------------|----|------------|-------------|-------------|
| cg02922734 | CARKD       | 13 | 0.01300324 | 0.566167277 | 0.699477304 |
| cg03615408 | CARM1       | 19 | 0.00067935 | 0.668374902 | 0.842327201 |
| cg02321885 | CARM1       | 19 | 0.00502754 | 0.336498517 | 0.491962127 |
| cg08862742 | CARS;CARS;C | 11 | 0.0024688  | 0.224051076 | 0.424660517 |
| cg14312661 | CARS;CARS;C | 11 | 0.03010462 | 0.129084211 | 0.284610049 |
| cg04532438 | CARS2       | 13 | 0.00621776 | 0.700361907 | 0.82858803  |
| cg15597662 | CASC3       | 17 | 0.00814802 | 0.35984287  | 0.519560042 |
| cg05446253 | CASKIN2;CAS | 17 | 0.00031979 | 0.284278628 | 0.488827154 |
| cg09457470 | CASKIN2;CAS | 17 | 0.00040832 | 0.437453759 | 0.61522461  |
| cg09662798 | CASKIN2;CAS | 17 | 9.83E-05   | 0.255067691 | 0.428403467 |
| cg25525709 | CASKIN2;CAS | 17 | 9.37E-05   | 0.679236459 | 0.825199888 |
| cg19405868 | CASP1;CASP1 | 11 | 0.00475837 | 0.69014884  | 0.841762751 |
| cg01128042 | CASP7;CASP7 | 10 | 0.02884025 | 0.249964046 | 0.487503406 |
| cg26194092 | CASP9;CASP9 | 1  | 0.00842581 | 0.563574393 | 0.671287036 |
| cg15064681 | CASQ2       | 1  | 0.00781546 | 0.524366917 | 0.678197439 |
| cg17158913 | CASZ1;CASZ1 | 1  | 0.00097451 | 0.308952095 | 0.43203323  |
| cg07625774 | CBFA2T3     | 16 | 0.0402362  | 0.270620257 | 0.373818845 |
| cg05540133 | CBFA2T3;CBF | 16 | 0.00163736 | 0.464219336 | 0.632763271 |
| cg08345246 | CBFA2T3;CBF | 16 | 0.00085295 | 0.544135421 | 0.662865291 |
| cg04469016 | CBFA2T3;CBF | 16 | 0.00103619 | 0.187840776 | 0.291444159 |
| cg27460526 | CBLN4       | 20 | 0.03831935 | 0.388867222 | 0.530515609 |
| cg03845745 | CBR4        | 4  | 0.02117268 | 0.431614453 | 0.579304954 |
| cg14436491 | CBWD1;CBW   | 9  | 0.00042158 | 0.206169914 | 0.308813174 |
| cg09257178 | CBWD2;LOC4  | 2  | 5.28E-05   | 0.407046085 | 0.580293008 |
| cg14565914 | CBX3;CBX3   | 7  | 0.00020704 | 0.708925796 | 0.826763626 |
| cg05738585 | CBX6        | 22 | 0.00098544 | 0.324409509 | 0.456426039 |
| cg03755052 | CCDC102A    | 16 | 0.00653478 | 0.651772594 | 0.784314816 |
| cg02102533 | CCDC102A    | 16 | 0.00234622 | 0.38485595  | 0.492075338 |
| cg12580580 | CCDC109A    | 10 | 0.02123832 | 0.396876633 | 0.533390337 |
| cg18251984 | CCDC144NL   | 17 | 0.02352589 | 0.530455623 | 0.673937892 |
| cg10744200 | CCDC149;CCI | 4  | 0.02074857 | 0.33273524  | 0.482794179 |
| cg21646082 | CCDC21      | 1  | 0.02353921 | 0.326816768 | 0.436290042 |
| cg11134246 | CCDC24      | 1  | 0.00188451 | 0.378512085 | 0.532831717 |
| cg03937687 | CCDC27      | 1  | 0.00034186 | 0.661236298 | 0.771485142 |
| cg08879528 | CCDC3       | 10 | 0.02376882 | 0.295547582 | 0.43842182  |
| cg13389211 | CCDC40      | 17 | 0.00333804 | 0.31977175  | 0.52602749  |
| cg23197939 | CCDC40      | 17 | 0.00993262 | 0.610172193 | 0.775378203 |
| cg02484127 | CCDC48      | 3  | 0.00767248 | 0.322149368 | 0.424996529 |
| cg17529890 | CCDC52      | 3  | 0.00767248 | 0.674842821 | 0.835788308 |
| cg17751591 | CCDC57      | 17 | 0.00082872 | 0.462853546 | 0.636484341 |
| cg02967812 | CCDC57      | 17 | 0.00212024 | 0.445136193 | 0.610505693 |
| cg12879038 | CCDC57      | 17 | 0.01843525 | 0.319036005 | 0.482285062 |
| cg22110888 | CCDC57      | 17 | 0.00029099 | 0.479703541 | 0.634436752 |
| cg26507988 | CCDC57      | 17 | 0.02231042 | 0.532144728 | 0.671234602 |
| cg11935831 | CCDC57      | 17 | 0.00161232 | 0.368431702 | 0.491128039 |
| cg20780302 | CCDC57      | 17 | 0.0102351  | 0.218867438 | 0.336336443 |

|            |             |    |            |             |             |
|------------|-------------|----|------------|-------------|-------------|
| cg14352267 | CCDC68      | 18 | 0.03723853 | 0.633199836 | 0.745270711 |
| cg12113740 | CCDC68;CCD  | 18 | 0.01322469 | 0.402252975 | 0.562587553 |
| cg14001165 | CCDC69      | 5  | 0.02241382 | 0.296758968 | 0.434583418 |
| cg11715966 | CCDC8       | 19 | 0.01756164 | 0.250885835 | 0.377723596 |
| cg19463256 | CCDC8       | 19 | 0.00693888 | 0.180421002 | 0.287132827 |
| cg17448223 | CCDC81;CCD  | 11 | 0.00814802 | 0.729203682 | 0.854240094 |
| cg18864926 | CCDC85C     | 14 | 0.02714334 | 0.462620202 | 0.571107213 |
| cg05233289 | CCDC88B     | 11 | 0.00070508 | 0.331313236 | 0.48861063  |
| cg11657323 | CCDC88B     | 11 | 0.0004363  | 0.168042689 | 0.320680227 |
| cg12797157 | CCDC88B     | 11 | 0.00272488 | 0.144571937 | 0.280200482 |
| cg15175716 | CCDC88B     | 11 | 0.00233141 | 0.317025883 | 0.445838351 |
| cg21250436 | CCDC91      | 12 | 0.02525645 | 0.727256962 | 0.83259179  |
| cg00156230 | CCM2;CCM2   | 7  | 0.04896649 | 0.129424321 | 0.280687995 |
| cg06539449 | CCND1       | 11 | 0.00038114 | 0.29565573  | 0.53564484  |
| cg04717045 | CCND1       | 11 | 0.00195139 | 0.406357872 | 0.62410822  |
| cg12263469 | CCND1       | 11 | 0.00076883 | 0.489986076 | 0.627965864 |
| cg09637363 | CCND1       | 11 | 0.00024097 | 0.264389828 | 0.375462681 |
| cg11802013 | CCND1       | 11 | 0.03415718 | 0.556871004 | 0.663109952 |
| cg02723533 | CCND1       | 11 | 0.00851079 | 0.774220812 | 0.879319412 |
| cg00417288 | CCND2       | 12 | 0.00011804 | 0.54192169  | 0.807454082 |
| cg12594237 | CCND2       | 12 | 0.00051123 | 0.665347177 | 0.835235372 |
| cg26491833 | CCND3;TAF8  | 6  | 0.04757084 | 0.356406002 | 0.462333151 |
| cg21475610 | CCNG2       | 4  | 0.02553015 | 0.131008074 | 0.235315059 |
| cg09884635 | CCNI2       | 5  | 0.00831258 | 0.407995982 | 0.508738497 |
| cg13554033 | CCNK;CCNK   | 14 | 0.00360738 | 0.6768882   | 0.78779378  |
| cg15811904 | CCNK;CCNK   | 14 | 0.02302251 | 0.365607601 | 0.47225681  |
| cg02950701 | CCNY;CCNY   | 10 | 0.00424631 | 0.253006931 | 0.434336917 |
| cg09509673 | CCR10;CNTN  | 17 | 0.03970972 | 0.432074145 | 0.557414931 |
| cg09033997 | CCR9;CCR9   | 3  | 0.00057627 | 0.738508349 | 0.856407373 |
| cg24508095 | CD151;CD151 | 11 | 0.00625882 | 0.481634068 | 0.599607544 |
| cg08614201 | CD160       | 1  | 0.00177863 | 0.563158822 | 0.721939668 |
| cg15166089 | CD164L2     | 1  | 0.00631667 | 0.491759964 | 0.59735329  |
| cg07458509 | CD320;CD320 | 19 | 0.00446383 | 0.237427904 | 0.374699261 |
| cg17393635 | CD37;CD37   | 19 | 0.0005211  | 0.322612921 | 0.443723303 |
| cg26289436 | CD37;CD37   | 19 | 0.00551051 | 0.219403259 | 0.321722803 |
| cg11749672 | CD37;CD37   | 19 | 0.00053478 | 0.224874537 | 0.326893767 |
| cg03848831 | CD81        | 11 | 0.03301456 | 0.638962837 | 0.782510804 |
| cg18169610 | CD81        | 11 | 0.00023739 | 0.458159459 | 0.595756674 |
| cg07813265 | CDC14A;CDC  | 1  | 0.0043998  | 0.351633514 | 0.474670515 |
| cg04715649 | CDC42BPB    | 14 | 0.01009667 | 0.159242931 | 0.288478888 |
| cg26975587 | CDC42BPB    | 14 | 0.01221122 | 0.680799705 | 0.804110651 |
| cg14267099 | CDC42BPG    | 11 | 0.01291544 | 0.427919731 | 0.587602307 |
| cg05236720 | CDC42EP3    | 2  | 0.00237273 | 0.360155599 | 0.545120595 |
| cg27613998 | CDC42EP3    | 2  | 0.01820348 | 0.368594006 | 0.520998316 |
| cg15703377 | CDC42EP4    | 17 | 0.00029141 | 0.532862661 | 0.75822143  |
| cg27065254 | CDC42EP4    | 17 | 4.70E-05   | 0.288060127 | 0.47497024  |

|            |             |    |            |             |             |
|------------|-------------|----|------------|-------------|-------------|
| cg17379666 | CDC42EP4    | 17 | 0.04133427 | 0.137967319 | 0.241337334 |
| cg02123767 | CDC42EP4    | 17 | 0.00335726 | 0.635964603 | 0.738105503 |
| cg24527183 | CDC42SE2;CI | 5  | 0.02343511 | 0.556733484 | 0.675111708 |
| cg01093138 | CDH13       | 16 | 0.0393615  | 0.477297015 | 0.641614354 |
| cg27347146 | CDH15       | 16 | 0.00151565 | 0.554245691 | 0.662772232 |
| cg05323683 | CDH17;CDH1  | 8  | 0.02075716 | 0.128006978 | 0.295694879 |
| cg03028769 | CDH23       | 10 | 0.00072228 | 0.663279381 | 0.772060667 |
| cg13714026 | CDH23;CDH2  | 10 | 0.00584883 | 0.178733638 | 0.343762093 |
| cg19615295 | CDH26;CDH2  | 20 | 0.00053711 | 0.222269176 | 0.447159698 |
| cg05376601 | CDH3        | 16 | 0.01759521 | 0.536942932 | 0.664673595 |
| cg05086443 | CDH5        | 16 | 0.00323249 | 0.487645975 | 0.601157231 |
| cg01814495 | CDIPT       | 16 | 0.00033877 | 0.405160509 | 0.571420048 |
| cg14139051 | CDK14       | 7  | 0.00417563 | 0.273521461 | 0.451642178 |
| cg01720722 | CDK18;CDK1  | 1  | 8.66E-05   | 0.200433459 | 0.334682838 |
| cg24060173 | CDK18;CDK1  | 1  | 0.00068256 | 0.203329781 | 0.307260395 |
| cg14948795 | CDK2AP1     | 12 | 0.00621776 | 0.241277494 | 0.387432053 |
| cg13189671 | CDK2AP1     | 12 | 0.00050835 | 0.692590595 | 0.796365894 |
| cg04270264 | CDK5RAP1;CI | 20 | 0.03128913 | 0.260350476 | 0.412807498 |
| cg06028870 | CDKAL1      | 6  | 0.02375683 | 0.581369822 | 0.691466286 |
| cg05426966 | CDKL2       | 4  | 0.0151239  | 0.262529106 | 0.398713453 |
| cg23419490 | CDKN1C;CDK  | 11 | 0.00038731 | 0.495886397 | 0.701130116 |
| cg02953912 | CDKN1C;CDK  | 11 | 0.00047665 | 0.496147452 | 0.680273875 |
| cg11944284 | CDKN1C;CDK  | 11 | 0.00039095 | 0.280511837 | 0.443734381 |
| cg06962787 | CDRT1;CDRT  | 17 | 0.04118865 | 0.225979601 | 0.363522649 |
| cg01838596 | CDYL;CDYL;C | 6  | 0.00057431 | 0.303017008 | 0.530194507 |
| cg04148753 | CDYL;CDYL;C | 6  | 0.00162255 | 0.48233268  | 0.658670322 |
| cg01510990 | CDYL;CDYL;C | 6  | 0.04506986 | 0.252024872 | 0.364359525 |
| cg13248581 | CECR1;CECR1 | 22 | 0.00662118 | 0.126262756 | 0.260494588 |
| cg21830459 | CECR1;CECR1 | 22 | 0.00165021 | 0.207825732 | 0.34198503  |
| cg22910462 | CECR1;CECR1 | 22 | 0.00256404 | 0.189153656 | 0.31921684  |
| cg01972843 | CECR1;CECR1 | 22 | 0.01669423 | 0.181480926 | 0.286941789 |
| cg04963575 | CELA1       | 12 | 0.00637635 | 0.525714984 | 0.6355442   |
| cg02167613 | CELSR1      | 22 | 0.02692274 | 0.521868127 | 0.628573267 |
| cg17530411 | CELSR2      | 1  | 0.04965141 | 0.632313824 | 0.750242984 |
| cg22595230 | CENPB       | 20 | 0.00482282 | 0.211624398 | 0.31334857  |
| cg00018198 | CEP68       | 2  | 0.00695699 | 0.324882881 | 0.456337665 |
| cg09136695 | CEPT1;CEPT1 | 1  | 0.00697099 | 0.680555798 | 0.815823506 |
| cg27469810 | CETN1       | 18 | 0.04427652 | 0.663436254 | 0.777882    |
| cg05922384 | CFH         | 1  | 0.00055056 | 0.623505483 | 0.825778764 |
| cg16767221 | CGNL1       | 15 | 0.00909197 | 0.411967057 | 0.614671896 |
| cg07981370 | CHAC1;CHAC  | 15 | 0.00305184 | 0.640423955 | 0.755076235 |
| cg22608534 | CHADL       | 22 | 0.00072581 | 0.337044126 | 0.506263561 |
| cg16195245 | CHADL       | 22 | 0.00275072 | 0.156346854 | 0.263869292 |
| cg27570892 | CHCHD4;CHC  | 3  | 0.00283871 | 0.47577532  | 0.610323017 |
| cg25011252 | CHD7        | 8  | 0.01359443 | 0.621799613 | 0.724857433 |
| cg04031656 | CHD9        | 16 | 0.00022734 | 0.166665703 | 0.28210632  |

|            |             |    |            |             |             |
|------------|-------------|----|------------|-------------|-------------|
| cg04071104 | CHDH        | 3  | 0.01505319 | 0.14491268  | 0.30665364  |
| cg27567495 | CHDH        | 3  | 0.01591477 | 0.22440946  | 0.350833504 |
| cg21232015 | CHFR;CHFR;C | 12 | 0.00348651 | 0.21255962  | 0.394829378 |
| cg18451156 | CHFR;CHFR;C | 12 | 0.00425639 | 0.304492793 | 0.477513103 |
| cg24532476 | CHFR;CHFR;C | 12 | 0.00861595 | 0.323202385 | 0.485130783 |
| cg20066677 | CHFR;CHFR;C | 12 | 0.02142201 | 0.380747829 | 0.533401687 |
| cg05119810 | CHFR;CHFR;C | 12 | 0.00232517 | 0.638518554 | 0.75179832  |
| cg04002957 | CHID1;CHID1 | 11 | 0.02688214 | 0.742628022 | 0.878842276 |
| cg13318256 | CHKA;CHKA   | 11 | 0.00350029 | 0.211702283 | 0.40494738  |
| cg16087630 | CHKA;CHKA   | 11 | 0.01377931 | 0.612524305 | 0.720257267 |
| cg03964373 | CHML;OPN3   | 1  | 0.03189023 | 0.574294952 | 0.778046564 |
| cg08723459 | CHMP1A;CHI  | 16 | 0.0009756  | 0.580581476 | 0.734272547 |
| cg01497921 | CHMP1A;CHI  | 16 | 0.00514601 | 0.409566164 | 0.561980933 |
| cg05143398 | CHN1;CHN1   | 2  | 0.0120408  | 0.713647757 | 0.83508632  |
| cg25706861 | CHPF        | 2  | 0.02375941 | 0.644829396 | 0.770719834 |
| cg11210878 | CHRM1       | 11 | 0.01300111 | 0.153890789 | 0.271862559 |
| cg07484827 | CHRNA10     | 11 | 0.03415406 | 0.519939923 | 0.621723908 |
| cg02963878 | CHRNA4      | 20 | 0.00552415 | 0.319460286 | 0.425478832 |
| cg09632936 | CHRNA9      | 4  | 0.04436271 | 0.220741157 | 0.347905194 |
| cg18406852 | CHST10      | 2  | 0.00304929 | 0.190533658 | 0.346072563 |
| cg11117177 | CHST11      | 12 | 0.00613676 | 0.35384398  | 0.504376551 |
| cg16255541 | CHST12      | 7  | 0.00112164 | 0.687145819 | 0.804736516 |
| cg02463137 | CHST15      | 10 | 0.04166517 | 0.558525008 | 0.664137689 |
| cg19698242 | CHST3       | 10 | 0.00359852 | 0.1517415   | 0.308838556 |
| cg20048045 | CHST3       | 10 | 0.03755219 | 0.224943288 | 0.341320432 |
| cg13902101 | CHSY1       | 15 | 0.00341549 | 0.421092812 | 0.641123488 |
| cg14496909 | CHSY1       | 15 | 0.00339293 | 0.521131508 | 0.681993361 |
| cg14923652 | CIDEA;CIDEA | 18 | 0.0138302  | 0.380932093 | 0.534656619 |
| cg03186620 | CILP2       | 19 | 0.0018887  | 0.242180074 | 0.385948168 |
| cg26635955 | CILP2       | 19 | 0.02312827 | 0.157011055 | 0.271336421 |
| cg06152070 | CISD3;MLLT6 | 17 | 0.01119064 | 0.59363419  | 0.702027624 |
| cg03339668 | CIT         | 12 | 0.00060815 | 0.20892469  | 0.392072861 |
| cg26097051 | CIT         | 12 | 0.00060246 | 0.238112633 | 0.379365281 |
| cg14312334 | CIT         | 12 | 0.00045455 | 0.268915407 | 0.392350713 |
| cg18881778 | CIT         | 12 | 0.00127763 | 0.134533234 | 0.249002129 |
| cg23307798 | CKB         | 14 | 0.00466407 | 0.29110125  | 0.420474983 |
| cg07180571 | CLASP1;CLAS | 2  | 0.02337882 | 0.25045636  | 0.403872066 |
| cg10950615 | CLASP1;CLAS | 2  | 0.0047161  | 0.689356009 | 0.8069975   |
| cg12051116 | CLASP1;CLAS | 2  | 0.03231657 | 0.46394026  | 0.565546582 |
| cg02784956 | CLASP2      | 3  | 0.00304398 | 0.699265479 | 0.803704364 |
| cg16591681 | CLCNKA;CLCI | 1  | 0.00080657 | 0.300572699 | 0.440916526 |
| cg21660130 | CLCNKB      | 1  | 0.02533883 | 0.270804337 | 0.4908522   |
| cg09808075 | CLCNKB      | 1  | 0.0032325  | 0.260367134 | 0.463623019 |
| cg09413450 | CLCNKB      | 1  | 0.00670264 | 0.210572046 | 0.32169068  |
| cg02571835 | CLDN10;CLDI | 13 | 0.00023192 | 0.772236347 | 0.875320613 |
| cg11744304 | CLDN15      | 7  | 0.00053511 | 0.265008676 | 0.41135061  |



|            |             |    |            |             |             |
|------------|-------------|----|------------|-------------|-------------|
| cg02512860 | CLDN15      | 7  | 0.00170065 | 0.396406231 | 0.516704774 |
| cg27507254 | CLDN19;CLDI | 1  | 0.00063619 | 0.327211197 | 0.452605094 |
| cg02882785 | CLDN22      | 4  | 0.03984929 | 0.632930213 | 0.756321189 |
| cg03038672 | CLDN9       | 16 | 0.00093798 | 0.649493269 | 0.770221216 |
| cg26597734 | CLEC16A     | 16 | 0.00870319 | 0.152999494 | 0.339488904 |
| cg03455828 | CLEC16A     | 16 | 0.00570178 | 0.274307225 | 0.459765709 |
| cg08082763 | CLEC16A     | 16 | 0.00916405 | 0.280042306 | 0.427823443 |
| cg27581211 | CLEC16A     | 16 | 0.0038972  | 0.345172508 | 0.445784385 |
| cg09126659 | CLEC18C     | 16 | 0.01620269 | 0.506708803 | 0.630265905 |
| cg06636831 | CLEC3B      | 3  | 0.00064393 | 0.220166109 | 0.340431544 |
| cg13423383 | CLIC3       | 9  | 0.00292879 | 0.169231402 | 0.300351642 |
| cg11653912 | CLIC4       | 1  | 0.00333912 | 0.425752469 | 0.543818103 |
| cg03603505 | CLIP1;CLIP1 | 12 | 0.00183308 | 0.643051263 | 0.759240762 |
| cg03058520 | CLK3;CLK3   | 15 | 0.00160044 | 0.540524209 | 0.693745414 |
| cg21871232 | CLMN        | 14 | 0.01189457 | 0.129102008 | 0.250674369 |
| cg05348776 | CLMN        | 14 | 0.00676378 | 0.142275032 | 0.245104203 |
| cg02397552 | CLN5        | 13 | 0.03296682 | 0.551518171 | 0.661885855 |
| cg27601809 | CLPB        | 11 | 0.00952355 | 0.103831314 | 0.206455551 |
| cg19981828 | CLRN1;CLRN: | 3  | 0.0467485  | 0.343598645 | 0.459857887 |
| cg12182284 | CLTB;CLTB   | 5  | 0.00030748 | 0.371614053 | 0.548541063 |
| cg24911827 | CLTCL1;CLTC | 22 | 0.00422679 | 0.296174681 | 0.410897155 |
| cg25302704 | CLU;CLU     | 8  | 0.00254153 | 0.695970804 | 0.826376556 |
| cg03129774 | CLUAP1      | 16 | 0.02165944 | 0.131433866 | 0.342692447 |
| cg24852561 | CLYBL       | 13 | 0.00026193 | 0.48767282  | 0.658124115 |
| cg18424717 | CLYBL       | 13 | 0.01381137 | 0.576494728 | 0.713217991 |
| cg23284609 | CMBL        | 5  | 0.00894643 | 0.377071059 | 0.518466688 |
| cg05705335 | CMIP        | 16 | 0.00080849 | 0.279503957 | 0.41971198  |
| cg08344351 | CMIP        | 16 | 0.0071251  | 0.133136112 | 0.263173637 |
| cg05438708 | CMIP        | 16 | 0.00188842 | 0.205754414 | 0.316276887 |
| cg03122201 | CMIP;CMIP   | 16 | 0.00204511 | 0.2006156   | 0.38498464  |
| cg01761552 | CMIP;CMIP   | 16 | 0.01706088 | 0.46485327  | 0.640479744 |
| cg06896529 | CMIP;CMIP   | 16 | 0.00533478 | 0.228075528 | 0.394547295 |
| cg16353318 | CMIP;CMIP   | 16 | 0.00034583 | 0.429961306 | 0.585642669 |
| cg09963814 | CMIP;CMIP   | 16 | 0.00120593 | 0.212530519 | 0.363821117 |
| cg08682723 | CMIP;CMIP   | 16 | 0.0049889  | 0.296938688 | 0.444336657 |
| cg06473941 | CMIP;CMIP   | 16 | 0.00295237 | 0.175836542 | 0.303232023 |
| cg05887079 | CMIP;CMIP   | 16 | 0.00688557 | 0.517185112 | 0.631312703 |
| cg01439753 | CMIP;CMIP   | 16 | 0.02813085 | 0.171452377 | 0.283113862 |
| cg10191399 | CMIP;CMIP   | 16 | 0.00152032 | 0.275378279 | 0.384723184 |
| cg03031932 | CMIP;CMIP   | 16 | 0.00126085 | 0.688861517 | 0.794542213 |
| cg02053054 | CMTM1;CMT   | 16 | 0.00741311 | 0.437813704 | 0.659993861 |
| cg05404009 | CMTM4;CMT   | 16 | 0.03648452 | 0.13320189  | 0.283063406 |
| cg06715352 | CMTM4;CMT   | 16 | 0.00712732 | 0.672645111 | 0.785789587 |
| cg22843111 | CMYA5       | 5  | 0.00922787 | 0.159992892 | 0.358197488 |
| cg05226518 | CNIH        | 14 | 0.00246017 | 0.361975311 | 0.601043939 |
| cg27269110 | CNKS3       | 6  | 0.00088647 | 0.420682317 | 0.643903176 |

|            |            |    |            |             |             |
|------------|------------|----|------------|-------------|-------------|
| cg16175941 | CNKSR3     | 6  | 0.01676147 | 0.289497845 | 0.467516422 |
| cg27390253 | CNN1       | 19 | 0.01524022 | 0.69048013  | 0.800584194 |
| cg12448539 | CNN3       | 1  | 0.00180549 | 0.379633196 | 0.582573701 |
| cg19164761 | CNN3       | 1  | 0.01095959 | 0.247732987 | 0.400344774 |
| cg04267765 | CNN3       | 1  | 0.02407887 | 0.526431308 | 0.6402812   |
| cg14701880 | CNOT2      | 12 | 0.01107106 | 0.776193695 | 0.886201571 |
| cg16563470 | CNP        | 17 | 0.00581964 | 0.153819087 | 0.281017551 |
| cg23687677 | CNP        | 17 | 0.00146582 | 0.226056113 | 0.338049607 |
| cg07871971 | CNTNAP1    | 17 | 0.00406626 | 0.499043062 | 0.64169761  |
| cg21692620 | CNTNAP1    | 17 | 0.01078365 | 0.141975207 | 0.24899717  |
| cg10524687 | COBL       | 7  | 0.01227882 | 0.558569991 | 0.692104347 |
| cg04723449 | COG7       | 16 | 0.00787503 | 0.459591221 | 0.609356217 |
| cg07472159 | COL10A1;NT | 6  | 0.02942534 | 0.712667798 | 0.82526284  |
| cg17820060 | COL11A1;CO | 1  | 0.01682921 | 0.726611862 | 0.882867455 |
| cg24311693 | COL11A2;CO | 6  | 9.51E-05   | 0.277124596 | 0.532870484 |
| cg02230225 | COL11A2;CO | 6  | 0.00044662 | 0.425915819 | 0.651175756 |
| cg18671115 | COL11A2;CO | 6  | 0.00205692 | 0.356918012 | 0.572384703 |
| cg01412022 | COL11A2;CO | 6  | 0.00165735 | 0.238385279 | 0.45141136  |
| cg26322749 | COL11A2;CO | 6  | 0.00013946 | 0.490816645 | 0.696432242 |
| cg21205776 | COL11A2;CO | 6  | 0.00045507 | 0.404330084 | 0.608487599 |
| cg15173443 | COL11A2;CO | 6  | 5.12E-05   | 0.454984651 | 0.65770289  |
| cg10736955 | COL11A2;CO | 6  | 0.00046304 | 0.508126345 | 0.710278358 |
| cg20269729 | COL11A2;CO | 6  | 0.0004969  | 0.371203693 | 0.571589076 |
| cg15818109 | COL11A2;CO | 6  | 0.00072666 | 0.354270068 | 0.547055756 |
| cg22161893 | COL11A2;CO | 6  | 0.00080382 | 0.482985818 | 0.673349586 |
| cg12228461 | COL11A2;CO | 6  | 0.00090174 | 0.310604563 | 0.500181255 |
| cg22748722 | COL11A2;CO | 6  | 4.91E-05   | 0.498096195 | 0.682235943 |
| cg14683730 | COL11A2;CO | 6  | 0.00166356 | 0.187218643 | 0.371242025 |
| cg18375610 | COL11A2;CO | 6  | 9.67E-05   | 0.524475719 | 0.706649617 |
| cg12061370 | COL11A2;CO | 6  | 0.00166554 | 0.335043628 | 0.513779002 |
| cg00920162 | COL11A2;CO | 6  | 0.00509458 | 0.3763785   | 0.55359955  |
| cg12947757 | COL11A2;CO | 6  | 5.40E-05   | 0.34645467  | 0.522411976 |
| cg26981781 | COL11A2;CO | 6  | 0.00076717 | 0.355202359 | 0.530404353 |
| cg09502339 | COL11A2;CO | 6  | 0.00326836 | 0.328515448 | 0.503268042 |
| cg04249605 | COL11A2;CO | 6  | 0.00103239 | 0.295505134 | 0.469683379 |
| cg07457375 | COL11A2;CO | 6  | 0.00646151 | 0.14541176  | 0.31808512  |
| cg13617209 | COL11A2;CO | 6  | 0.00561599 | 0.259968727 | 0.432549525 |
| cg09261794 | COL11A2;CO | 6  | 0.01129803 | 0.238349942 | 0.404540987 |
| cg08077736 | COL11A2;CO | 6  | 0.00083674 | 0.232500073 | 0.391802244 |
| cg01194674 | COL11A2;CO | 6  | 0.00238122 | 0.179694323 | 0.334919734 |
| cg00514307 | COL11A2;CO | 6  | 0.00048037 | 0.561541567 | 0.714819927 |
| cg18384402 | COL11A2;CO | 6  | 0.00097869 | 0.522976204 | 0.674308441 |
| cg01320908 | COL11A2;CO | 6  | 0.00281593 | 0.596469892 | 0.747276942 |
| cg08733307 | COL11A2;CO | 6  | 0.00092408 | 0.183600536 | 0.330109559 |
| cg03260211 | COL11A2;CO | 6  | 0.00386651 | 0.337290908 | 0.483109236 |
| cg15239679 | COL11A2;CO | 6  | 0.01243191 | 0.204889809 | 0.348178576 |

|            |            |    |            |             |             |
|------------|------------|----|------------|-------------|-------------|
| cg20798604 | COL11A2;CO | 6  | 0.00610611 | 0.29583239  | 0.437475402 |
| cg16139380 | COL11A2;CO | 6  | 0.00106511 | 0.441107555 | 0.577970931 |
| cg03500646 | COL11A2;CO | 6  | 0.00995984 | 0.230303403 | 0.365958347 |
| cg00866054 | COL11A2;CO | 6  | 0.00069402 | 0.284075865 | 0.419464338 |
| cg12881453 | COL11A2;CO | 6  | 0.00021562 | 0.171388011 | 0.30642908  |
| cg05738403 | COL11A2;CO | 6  | 0.00048652 | 0.354411555 | 0.48821548  |
| cg18624108 | COL11A2;CO | 6  | 0.00045223 | 0.564212448 | 0.695903825 |
| cg26867987 | COL11A2;CO | 6  | 0.00030084 | 0.199630665 | 0.329514699 |
| cg14466923 | COL11A2;CO | 6  | 0.00261673 | 0.347999338 | 0.476210917 |
| cg25482983 | COL11A2;CO | 6  | 0.01291565 | 0.273708459 | 0.401230429 |
| cg27590742 | COL11A2;CO | 6  | 0.00089898 | 0.698716923 | 0.823751481 |
| cg19887293 | COL11A2;CO | 6  | 0.00122113 | 0.360821421 | 0.482573824 |
| cg17596257 | COL11A2;CO | 6  | 0.02230704 | 0.477070077 | 0.596975656 |
| cg23912266 | COL11A2;CO | 6  | 0.00537957 | 0.425016402 | 0.544399397 |
| cg12312338 | COL11A2;CO | 6  | 0.0001918  | 0.326729863 | 0.442838028 |
| cg15407213 | COL11A2;CO | 6  | 0.00197437 | 0.138577587 | 0.254112808 |
| cg17790159 | COL11A2;CO | 6  | 0.00628575 | 0.204875452 | 0.318536354 |
| cg17636806 | COL11A2;CO | 6  | 0.00179126 | 0.375500061 | 0.488930015 |
| cg02890435 | COL11A2;CO | 6  | 0.00050835 | 0.353735564 | 0.465204552 |
| cg02667414 | COL11A2;CO | 6  | 0.00018382 | 0.608761912 | 0.719565551 |
| cg04653627 | COL11A2;CO | 6  | 0.0110298  | 0.548437212 | 0.657640477 |
| cg00936309 | COL11A2;CO | 6  | 0.01171438 | 0.427042423 | 0.535214317 |
| cg22361816 | COL11A2;CO | 6  | 0.00152272 | 0.46623826  | 0.572808313 |
| cg20427378 | COL11A2;CO | 6  | 0.00100239 | 0.288929128 | 0.394503064 |
| cg21893764 | COL11A2;CO | 6  | 0.0032652  | 0.14638538  | 0.248992039 |
| cg22044585 | COL11A2;CO | 6  | 0.01834097 | 0.710621555 | 0.811682816 |
| cg17591573 | COL11A2;CO | 6  | 0.00098193 | 0.216224496 | 0.449718822 |
| cg11835806 | COL11A2;CO | 6  | 0.00014612 | 0.296202915 | 0.499955053 |
| cg21509966 | COL11A2;CO | 6  | 0.00307913 | 0.335518724 | 0.528965362 |
| cg01680268 | COL11A2;CO | 6  | 0.00059056 | 0.170100183 | 0.361934116 |
| cg04182805 | COL11A2;CO | 6  | 0.00028199 | 0.475379986 | 0.666453665 |
| cg11411509 | COL11A2;CO | 6  | 0.00864448 | 0.172581426 | 0.362230054 |
| cg03790047 | COL11A2;CO | 6  | 0.0004559  | 0.441464161 | 0.627186135 |
| cg22501449 | COL11A2;CO | 6  | 0.00347116 | 0.231202253 | 0.407970422 |
| cg23704085 | COL11A2;CO | 6  | 0.00353612 | 0.183969157 | 0.359554351 |
| cg03783258 | COL11A2;CO | 6  | 0.00706853 | 0.20991235  | 0.378793147 |
| cg00505762 | COL11A2;CO | 6  | 0.00059442 | 0.188393507 | 0.350123273 |
| cg01806857 | COL11A2;CO | 6  | 0.00187795 | 0.218708263 | 0.377253466 |
| cg19628686 | COL11A2;CO | 6  | 0.01011607 | 0.211314406 | 0.364783127 |
| cg24864639 | COL11A2;CO | 6  | 0.00159391 | 0.312597566 | 0.453511496 |
| cg04137133 | COL11A2;CO | 6  | 0.00199742 | 0.156678491 | 0.267438442 |
| cg23231727 | COL11A2;CO | 6  | 0.00583603 | 0.157254016 | 0.261628731 |
| cg15089846 | COL12A1;CO | 6  | 0.00854671 | 0.660532277 | 0.778135411 |
| cg20436086 | COL13A1;CO | 10 | 0.0022409  | 0.232476175 | 0.425722443 |
| cg24488229 | COL16A1    | 1  | 0.0030624  | 0.228326349 | 0.343870909 |
| cg25832305 | COL18A1    | 21 | 0.01329923 | 0.608830543 | 0.751592206 |

|            |             |    |            |             |             |
|------------|-------------|----|------------|-------------|-------------|
| cg25613061 | COL23A1     | 5  | 3.77E-05   | 0.3107405   | 0.442838776 |
| cg18316500 | COL23A1     | 5  | 5.88E-05   | 0.344924787 | 0.464038273 |
| cg13427810 | COL27A1     | 9  | 0.00482435 | 0.406487463 | 0.649929733 |
| cg03758241 | COL27A1     | 9  | 0.01116864 | 0.158324511 | 0.307446343 |
| cg14031246 | COL27A1     | 9  | 0.00042068 | 0.567547268 | 0.70240566  |
| cg04382108 | COL27A1     | 9  | 0.00134255 | 0.208895166 | 0.335001806 |
| cg27301649 | COL29A1;CO  | 3  | 0.00467519 | 0.614111158 | 0.723612944 |
| cg15465823 | COL2A1;COL  | 12 | 0.00242454 | 0.138740917 | 0.326491859 |
| cg08715466 | COL2A1;COL  | 12 | 0.00105563 | 0.269203226 | 0.456310091 |
| cg15108410 | COL2A1;COL  | 12 | 0.00167497 | 0.244505736 | 0.390089788 |
| cg10502244 | COL2A1;COL  | 12 | 0.0012007  | 0.217167173 | 0.340105994 |
| cg01906695 | COL2A1;COL  | 12 | 0.00528291 | 0.25251321  | 0.370675279 |
| cg08234256 | COL4A1      | 13 | 0.01506095 | 0.201200319 | 0.329322434 |
| cg00050792 | COL4A1      | 13 | 0.0164789  | 0.18436037  | 0.306185843 |
| cg13618741 | COL5A1      | 9  | 0.00142373 | 0.239721117 | 0.371889712 |
| cg13567205 | COL5A1      | 9  | 0.00177914 | 0.517465516 | 0.643219226 |
| cg13787768 | COL5A1      | 9  | 0.0255758  | 0.2038368   | 0.306236582 |
| cg24795748 | COL6A1      | 21 | 4.70E-05   | 0.355650331 | 0.473769364 |
| cg11401293 | COL6A1      | 21 | 0.00453888 | 0.292377249 | 0.393103945 |
| cg22247792 | COL6A2;COL  | 21 | 0.0009506  | 0.4795351   | 0.666077274 |
| cg00929658 | COL6A2;COL  | 21 | 0.01620398 | 0.65502195  | 0.816430668 |
| cg20502977 | COL6A3;COL  | 2  | 0.00908975 | 0.310908508 | 0.535289437 |
| cg04869122 | COL6A3;COL  | 2  | 0.00705765 | 0.266825083 | 0.37876147  |
| cg18344769 | COL8A1;MIR  | 3  | 0.00768708 | 0.752173163 | 0.855367624 |
| cg03878567 | COL9A1;COL  | 6  | 0.00146947 | 0.284438259 | 0.538526924 |
| cg06598544 | COL9A3      | 20 | 0.00153943 | 0.350849705 | 0.550510739 |
| cg03059921 | COL9A3      | 20 | 0.00052187 | 0.294996733 | 0.453617371 |
| cg07305723 | COL9A3      | 20 | 0.00050609 | 0.458976758 | 0.571725971 |
| cg20950633 | COLQ;COLQ;  | 3  | 0.00452553 | 0.58922345  | 0.721185746 |
| cg11266863 | COMMD10     | 5  | 0.02667576 | 0.733380051 | 0.8522261   |
| cg26239085 | COMMD7;CC   | 20 | 0.00882184 | 0.478499584 | 0.600577771 |
| cg14132916 | COPS8;COPS  | 2  | 0.00142831 | 0.712091904 | 0.82748011  |
| cg24888814 | COPZ1       | 12 | 0.00703782 | 0.364378517 | 0.548478661 |
| cg18957463 | CORIN       | 4  | 0.04272194 | 0.103716323 | 0.264304123 |
| cg12449974 | CORO2B      | 15 | 0.00014702 | 0.225562997 | 0.56770091  |
| cg08594043 | CORO2B      | 15 | 0.045724   | 0.404198197 | 0.523380952 |
| cg01678309 | CORO2B      | 15 | 0.00468265 | 0.192222498 | 0.310940902 |
| cg02351655 | CORO7       | 16 | 0.00576336 | 0.26343971  | 0.400596008 |
| cg09069446 | CORO7       | 16 | 0.001383   | 0.368225477 | 0.470414324 |
| cg20163085 | CORT;APITD1 | 1  | 0.01591665 | 0.580842636 | 0.686150792 |
| cg25407372 | CORT;APITD1 | 1  | 0.00883074 | 0.156385141 | 0.25997932  |
| cg27299949 | COX7B2      | 4  | 0.01317749 | 0.758518074 | 0.891848863 |
| cg09457255 | CP          | 3  | 0.00641646 | 0.769195861 | 0.872385097 |
| cg16847637 | CPA1;CPA1   | 7  | 0.00313066 | 0.19140215  | 0.328019431 |
| cg03951662 | CPD         | 17 | 0.0136441  | 0.510806243 | 0.682364259 |
| cg01708636 | CPE         | 4  | 0.02505091 | 0.283316362 | 0.445568183 |

|            |             |    |            |             |             |
|------------|-------------|----|------------|-------------|-------------|
| cg11043571 | CPE         | 4  | 0.01231996 | 0.167233513 | 0.303753406 |
| cg17453840 | CPEB1       | 15 | 0.02845699 | 0.203529436 | 0.341933196 |
| cg15341575 | CPEB3       | 10 | 0.01620765 | 0.184584261 | 0.354645963 |
| cg20495964 | CPNE5       | 6  | 0.00682865 | 0.52944998  | 0.631316516 |
| cg16616467 | CPNE7;CPNE  | 16 | 0.00128046 | 0.160951644 | 0.30805779  |
| cg16710448 | CPSF3       | 2  | 0.00952355 | 0.55403017  | 0.706591645 |
| cg23689441 | CPSF3L      | 1  | 0.0389175  | 0.503000499 | 0.609344521 |
| cg23957742 | CPSF4;CPSF4 | 7  | 0.01187959 | 0.477306866 | 0.581818273 |
| cg03101058 | CPSF4L      | 17 | 0.00063254 | 0.400774581 | 0.575104425 |
| cg15211864 | CPT1A;CPT1A | 11 | 0.00589751 | 0.202771378 | 0.394518236 |
| cg26906629 | CPT1A;CPT1A | 11 | 0.0003766  | 0.433791805 | 0.602607183 |
| cg04732324 | CPT1A;CPT1A | 11 | 0.00054026 | 0.632889253 | 0.755277953 |
| cg20285002 | CPT1A;CPT1A | 11 | 0.00170025 | 0.693868867 | 0.800753347 |
| cg08260245 | CPT1B;CPT1E | 22 | 0.0123661  | 0.290969987 | 0.397850587 |
| cg19112186 | CPT1B;CPT1E | 22 | 0.02229186 | 0.187562961 | 0.298845406 |
| cg24363820 | CPT1B;CPT1E | 22 | 0.00828548 | 0.166131569 | 0.266937448 |
| cg23729283 | CPVL;CPVL   | 7  | 0.00613387 | 0.491446895 | 0.638356455 |
| cg20242781 | CPVL;CPVL   | 7  | 0.00383187 | 0.289096824 | 0.399509583 |
| cg26270695 | CRABP1      | 15 | 0.02243168 | 0.169991254 | 0.312824267 |
| cg10333594 | CRAMP1L     | 16 | 0.0020762  | 0.18182853  | 0.293397252 |
| cg19573230 | CREB3L2     | 7  | 0.00138157 | 0.47087931  | 0.621319096 |
| cg04604708 | CREB3L2     | 7  | 0.04146421 | 0.130165921 | 0.23602967  |
| cg12552104 | CREB5;CREB5 | 7  | 0.00244384 | 0.293203459 | 0.486536389 |
| cg20315150 | CREB5;CREB5 | 7  | 0.01701581 | 0.452721439 | 0.639860914 |
| cg07042532 | CREB5;CREB5 | 7  | 0.0009415  | 0.406272746 | 0.556781704 |
| cg14862787 | CREB5;CREB5 | 7  | 0.00084618 | 0.565562837 | 0.695305715 |
| cg13495373 | CREB5;CREB5 | 7  | 0.0182726  | 0.375108136 | 0.501727862 |
| cg19588408 | CREB5;CREB5 | 7  | 0.00062301 | 0.269073551 | 0.478613086 |
| cg21159940 | CREB5;CREB5 | 7  | 0.00200899 | 0.197268334 | 0.399496073 |
| cg19559984 | CREB5;CREB5 | 7  | 0.00201469 | 0.279942394 | 0.441190693 |
| cg20306842 | CREB5;CREB5 | 7  | 0.02520538 | 0.177343249 | 0.30814311  |
| cg09450153 | CREB5;CREB5 | 7  | 0.01764009 | 0.265263542 | 0.382651956 |
| cg13995399 | CREB5;CREB5 | 7  | 0.00837299 | 0.160786468 | 0.271195604 |
| cg09269891 | CREBBP;CREB | 16 | 0.00066546 | 0.737432903 | 0.847864071 |
| cg09967633 | CRISPLD2    | 16 | 0.00175815 | 0.43064311  | 0.633593948 |
| cg04704487 | CRISPLD2    | 16 | 0.00367632 | 0.175168033 | 0.371779042 |
| cg00263677 | CRISPLD2    | 16 | 0.01028941 | 0.170548318 | 0.280128602 |
| cg13407975 | CRLF1       | 19 | 0.01683182 | 0.112042645 | 0.224071626 |
| cg14973240 | CROCC       | 1  | 0.00744491 | 0.09431588  | 0.264133931 |
| cg00094269 | CROCC       | 1  | 0.00115842 | 0.588329391 | 0.693944766 |
| cg10558598 | CROCCL1     | 1  | 0.00131464 | 0.261448797 | 0.410576218 |
| cg25680629 | CRTAP       | 3  | 0.02264387 | 0.125908317 | 0.265744837 |
| cg02961385 | CRTC1;CRTC1 | 19 | 0.00127243 | 0.231387294 | 0.431285686 |
| cg07015183 | CRTC1;CRTC1 | 19 | 0.00258241 | 0.50330789  | 0.693374062 |
| cg23661824 | CRTC1;CRTC1 | 19 | 0.0033089  | 0.501172873 | 0.650193849 |
| cg01874562 | CRTC1;CRTC1 | 19 | 0.00682264 | 0.149516178 | 0.277141991 |

|            |             |    |            |             |             |
|------------|-------------|----|------------|-------------|-------------|
| cg03073714 | CRY1        | 12 | 0.02331332 | 0.462947109 | 0.625593305 |
| cg08688043 | CRYBA1      | 17 | 0.0039966  | 0.408527006 | 0.565150139 |
| cg25221625 | CRYBB3      | 22 | 0.00032348 | 0.56120219  | 0.690769006 |
| cg24580724 | CRYZ;CRYZ;C | 1  | 0.00069769 | 0.23360346  | 0.434377773 |
| cg18636739 | CSDA;CSDA   | 12 | 0.01807169 | 0.143743727 | 0.277329288 |
| cg20704330 | CSF2        | 5  | 0.00154244 | 0.508802835 | 0.654233247 |
| cg01129958 | CSGALNACT1  | 8  | 0.00175137 | 0.382689036 | 0.596410771 |
| cg00158770 | CSGALNACT1  | 8  | 0.00031166 | 0.396701885 | 0.551415331 |
| cg12059540 | CSGALNACT1  | 8  | 0.01448196 | 0.257895434 | 0.402811831 |
| cg05800416 | CSGALNACT1  | 8  | 0.0089938  | 0.20532718  | 0.335310493 |
| cg20552236 | CSK;CSK     | 15 | 0.0039386  | 0.250124981 | 0.35731963  |
| cg01807946 | CSNK1D;CSN  | 17 | 0.00401346 | 0.211019415 | 0.31957441  |
| cg05843621 | CSNK1D;CSN  | 17 | 0.010191   | 0.633439597 | 0.737937938 |
| cg06129556 | CSNK1G1     | 15 | 0.00214074 | 0.333639243 | 0.592825737 |
| cg06470424 | CSNK1G2     | 19 | 0.00044209 | 0.222008458 | 0.378014183 |
| cg07894846 | CSNK1G2     | 19 | 0.00495972 | 0.769729468 | 0.883149971 |
| cg25902666 | CSNK1G2     | 19 | 0.02192636 | 0.716679689 | 0.817091752 |
| cg05208483 | CSPG4       | 15 | 0.00389496 | 0.418906378 | 0.612180909 |
| cg06734519 | CSPG4       | 15 | 0.00025065 | 0.566511467 | 0.744253382 |
| cg23893942 | CSPG4       | 15 | 0.00123011 | 0.394971428 | 0.545062911 |
| cg03238581 | CSPG4       | 15 | 0.01823513 | 0.083337279 | 0.229979676 |
| cg05729827 | CSPG4       | 15 | 0.00181616 | 0.456049918 | 0.582759998 |
| cg21460582 | CSPG4       | 15 | 0.0194448  | 0.116941992 | 0.235040231 |
| cg02400942 | CSPG4       | 15 | 0.03484773 | 0.110489732 | 0.222967189 |
| cg14029169 | CST3        | 20 | 0.00281198 | 0.646156902 | 0.794481745 |
| cg10911844 | CTBP1;CTBP1 | 4  | 0.04801705 | 0.287005056 | 0.448330226 |
| cg00148286 | CTBP1;CTBP1 | 4  | 0.00482704 | 0.439109715 | 0.581332039 |
| cg07928191 | CTBP1;CTBP1 | 4  | 0.0338358  | 0.627405057 | 0.765967052 |
| cg12525219 | CTBP1;CTBP1 | 4  | 0.00043819 | 0.589919757 | 0.710263263 |
| cg04195548 | CTBP1;CTBP1 | 4  | 0.00095422 | 0.342753263 | 0.458934033 |
| cg00814909 | CTBP1;CTBP1 | 4  | 0.00689763 | 0.391337821 | 0.50595128  |
| cg06166341 | CTBP1;CTBP1 | 4  | 0.00089339 | 0.527159491 | 0.632858008 |
| cg09758273 | CTBP1;CTBP1 | 4  | 0.00250268 | 0.540910736 | 0.645493777 |
| cg19936016 | CTBP1;CTBP1 | 4  | 0.00068434 | 0.425072318 | 0.527135549 |
| cg17523415 | CTBP2;CTBP2 | 10 | 0.0038716  | 0.587352322 | 0.711473701 |
| cg09559798 | CTBP2;CTBP2 | 10 | 0.00765351 | 0.433138235 | 0.57656792  |
| cg11285912 | CTBP2;CTBP2 | 10 | 0.00103787 | 0.639291915 | 0.758681728 |
| cg27660388 | CTBP2;CTBP2 | 10 | 0.04160877 | 0.312873735 | 0.414336821 |
| cg06240209 | CTBP2;CTBP2 | 10 | 0.02331048 | 0.724093282 | 0.8274139   |
| cg07237540 | CTDP1;CTDP1 | 18 | 0.01025043 | 0.490184547 | 0.633459593 |
| cg07753598 | CTDSP1;CTDS | 2  | 0.0004559  | 0.410302022 | 0.658224372 |
| cg03228931 | CTDSP2      | 12 | 0.0024427  | 0.518887152 | 0.664027114 |
| cg27606822 | CTDSP2;MIR: | 12 | 8.93E-07   | 0.613136785 | 0.737968923 |
| cg13333722 | CTDSPL;CTDS | 3  | 0.0005373  | 0.636645605 | 0.774335749 |
| cg18499250 | CTDSPL;CTDS | 3  | 0.0083005  | 0.380754738 | 0.50372864  |
| cg08171483 | CTDSPL;CTDS | 3  | 0.04319246 | 0.117781133 | 0.23917393  |

|            |             |    |            |             |             |
|------------|-------------|----|------------|-------------|-------------|
| cg17359975 | CTGF        | 6  | 0.00139298 | 0.331017123 | 0.445297312 |
| cg05740575 | CTHRC1      | 8  | 0.00056518 | 0.145562041 | 0.353376993 |
| cg01156295 | CTNNA1;LRR  | 5  | 0.00632437 | 0.311412689 | 0.529496461 |
| cg06606949 | CTNNA1;LRR  | 5  | 0.02258267 | 0.268854108 | 0.429991188 |
| cg17315014 | CTNNA1;LRR  | 5  | 0.04492345 | 0.152731906 | 0.278187239 |
| cg11677683 | CTNNA1;LRR  | 5  | 0.00832311 | 0.163206428 | 0.333455146 |
| cg27004195 | CTNNA2;CTN  | 2  | 0.02459323 | 0.261167276 | 0.388654557 |
| cg04141648 | CTNNA3      | 10 | 0.03266858 | 0.573887108 | 0.680378375 |
| cg12232373 | CTNS;CTNS   | 17 | 0.0003542  | 0.575388618 | 0.684521346 |
| cg16118839 | CTSC;CTSC;C | 11 | 0.01328479 | 0.482341995 | 0.609415831 |
| cg08914150 | CTTN;CTTN   | 11 | 0.00756735 | 0.652818126 | 0.79845901  |
| cg13096351 | CTTN;CTTN   | 11 | 0.0302548  | 0.167656274 | 0.311893582 |
| cg02011981 | CTTN;CTTN   | 11 | 0.02436399 | 0.606902799 | 0.748113397 |
| cg07663344 | CTTN;CTTN   | 11 | 0.00454139 | 0.588588944 | 0.705994434 |
| cg07005180 | CTTN;CTTN   | 11 | 0.0080998  | 0.224278304 | 0.33857256  |
| cg22559630 | CTTNBP2     | 7  | 0.02700735 | 0.203476223 | 0.332795228 |
| cg10524701 | CTTNBP2     | 7  | 0.0028227  | 0.692019846 | 0.814611384 |
| cg08581745 | CUBN        | 10 | 0.00596055 | 0.158239692 | 0.36509503  |
| cg17436460 | CUBN        | 10 | 0.01340779 | 0.225053566 | 0.334131608 |
| cg12979590 | CUGBP1      | 11 | 0.01663312 | 0.537826171 | 0.69457025  |
| cg06352464 | CUGBP2;CUC  | 10 | 1.54E-06   | 0.198744704 | 0.483703308 |
| cg05833351 | CUGBP2;CUC  | 10 | 0.00844982 | 0.121059406 | 0.240656492 |
| cg26825849 | CUL4A;CUL4  | 13 | 0.01239509 | 0.309939428 | 0.443868622 |
| cg20080282 | CUL5        | 11 | 0.00669566 | 0.160753274 | 0.311728602 |
| cg26570844 | CUX1;CUX1;C | 7  | 0.00150232 | 0.210727701 | 0.497821927 |
| cg14466759 | CUX1;CUX1;C | 7  | 0.00138984 | 0.223167975 | 0.492411935 |
| cg24420432 | CUX1;CUX1;C | 7  | 0.00320482 | 0.186787835 | 0.429265578 |
| cg12349350 | CUX1;CUX1;C | 7  | 0.00426214 | 0.318707988 | 0.560659523 |
| cg20567148 | CUX1;CUX1;C | 7  | 0.00454583 | 0.210731143 | 0.43935017  |
| cg07266412 | CUX1;CUX1;C | 7  | 0.00373949 | 0.300642451 | 0.501054104 |
| cg17713751 | CUX1;CUX1;C | 7  | 0.00110734 | 0.422393975 | 0.593386989 |
| cg14203426 | CUX1;CUX1;C | 7  | 0.01064117 | 0.405859525 | 0.570556249 |
| cg24183566 | CUX1;CUX1;C | 7  | 0.02843492 | 0.199918303 | 0.359255973 |
| cg02911387 | CUX1;CUX1;C | 7  | 0.00695992 | 0.265249465 | 0.416678451 |
| cg17472610 | CUX1;CUX1;C | 7  | 0.00268796 | 0.23777892  | 0.369523506 |
| cg08549332 | CUX1;CUX1;C | 7  | 0.01447027 | 0.502026729 | 0.633688416 |
| cg03141815 | CUX1;CUX1;C | 7  | 0.02821421 | 0.677918051 | 0.781637559 |
| cg06471596 | CUX1;CUX1;C | 7  | 0.00963442 | 0.116770803 | 0.217199612 |
| cg18483404 | CUZD1       | 10 | 0.00230068 | 0.285621817 | 0.479266719 |
| cg20427865 | CX3CL1      | 16 | 0.04146538 | 0.170935903 | 0.307984622 |
| cg05724197 | CX3CL1      | 16 | 0.00092663 | 0.365699702 | 0.482990327 |
| cg22908000 | CXCR7       | 2  | 0.02018458 | 0.19185734  | 0.311315371 |
| cg14876315 | CXXC5       | 5  | 0.00033537 | 0.518897953 | 0.719404988 |
| cg06905511 | CXXC5       | 5  | 0.00491884 | 0.18764234  | 0.360492646 |
| cg05227215 | CXXC5       | 5  | 0.00214555 | 0.213326239 | 0.380617703 |
| cg13707793 | CXXC5       | 5  | 0.00049503 | 0.159290453 | 0.30024645  |

|            |              |    |            |             |             |
|------------|--------------|----|------------|-------------|-------------|
| cg23167035 | CXXC5        | 5  | 0.00202083 | 0.390124258 | 0.530740739 |
| cg17306279 | CXXC5        | 5  | 0.00101083 | 0.334884425 | 0.473754122 |
| cg22741735 | CXXC5        | 5  | 0.00558925 | 0.217094216 | 0.33939374  |
| cg04406620 | CYB5B        | 16 | 0.00765571 | 0.687024822 | 0.787776146 |
| cg15290965 | CYB5R2       | 11 | 0.00310247 | 0.178743053 | 0.337755001 |
| cg20619563 | CYB5R4       | 6  | 0.02379866 | 0.738424734 | 0.857878483 |
| cg02603251 | CYFIP2;CYFIP | 5  | 0.00508244 | 0.362321845 | 0.521202036 |
| cg09464728 | CYGB         | 17 | 0.00047914 | 0.267662185 | 0.38313175  |
| cg04790755 | CYHR1;CYHR   | 8  | 0.01918905 | 0.349958231 | 0.470048155 |
| cg20387172 | CYHR1;CYHR   | 8  | 0.01051487 | 0.533531025 | 0.648841566 |
| cg09201719 | CYP17A1      | 10 | 0.00046317 | 0.315365177 | 0.474549878 |
| cg21181051 | CYP20A1      | 2  | 0.03155373 | 0.307739319 | 0.479446395 |
| cg00999152 | CYP26B1      | 2  | 0.00059111 | 0.287667781 | 0.496431547 |
| cg01959421 | CYP26B1      | 2  | 0.00462227 | 0.144773852 | 0.343403443 |
| cg04586286 | CYP26B1      | 2  | 5.40E-05   | 0.731071484 | 0.850714073 |
| cg14447606 | CYP26B1      | 2  | 0.0065991  | 0.111727299 | 0.219486507 |
| cg09233204 | CYP26C1      | 10 | 0.04824442 | 0.260033623 | 0.401668431 |
| cg11234637 | CYP26C1      | 10 | 0.00471261 | 0.333436318 | 0.450831844 |
| cg25083618 | CYP26C1      | 10 | 0.00031984 | 0.212943675 | 0.328526924 |
| cg04564481 | CYP26C1      | 10 | 0.0017987  | 0.265363893 | 0.380618841 |
| cg07225966 | CYP26C1      | 10 | 0.02849692 | 0.123151569 | 0.227027392 |
| cg20293609 | CYR61        | 1  | 0.00165744 | 0.17348421  | 0.325710978 |
| cg07602008 | CYR61        | 1  | 0.00118704 | 0.139744697 | 0.247203077 |
| cg22123915 | CYR61        | 1  | 0.0101934  | 0.209742716 | 0.316274322 |
| cg06607764 | CYTH1;CYTH:  | 17 | 0.02565014 | 0.196831848 | 0.302643935 |
| cg27566403 | CYTH1;CYTH:  | 17 | 0.00110647 | 0.271974855 | 0.374858602 |
| cg08687948 | CYTH3        | 7  | 0.00163744 | 0.226575374 | 0.426539318 |
| cg20492034 | CYTH3        | 7  | 0.00150061 | 0.274697586 | 0.453764284 |
| cg08893109 | CYTH3        | 7  | 0.00429258 | 0.674908614 | 0.822775491 |
| cg13562102 | CYTH3        | 7  | 0.00021941 | 0.475105409 | 0.610931323 |
| cg05643545 | CYTSB;CYTSB  | 17 | 0.01095803 | 0.188381003 | 0.423441675 |
| cg21045385 | CYTSB;CYTSB  | 17 | 0.00883311 | 0.513903567 | 0.64739875  |
| cg20290367 | CYTSB;CYTSB  | 17 | 0.00692565 | 0.206745618 | 0.392581007 |
| cg09818912 | CYTSB;CYTSB  | 17 | 0.03526159 | 0.357079137 | 0.525044534 |
| cg17365725 | D2HGDH       | 2  | 0.00148819 | 0.491018601 | 0.643894537 |
| cg02386599 | DAAM2        | 6  | 0.03559826 | 0.207170831 | 0.310637733 |
| cg27351239 | DAAM2        | 6  | 0.01807125 | 0.151825663 | 0.253377382 |
| cg14190522 | DAB2IP       | 9  | 0.02891524 | 0.132053986 | 0.274186253 |
| cg06454084 | DACT3        | 19 | 0.00609808 | 0.286623495 | 0.518727742 |
| cg08906015 | DACT3        | 19 | 0.00061006 | 0.157130681 | 0.376619424 |
| cg12472022 | DAGLA        | 11 | 0.02208111 | 0.132407447 | 0.249474503 |
| cg20144359 | DAGLA        | 11 | 0.01214342 | 0.271397326 | 0.388061827 |
| cg16854606 | DAND5        | 19 | 0.00209628 | 0.234602772 | 0.37683388  |
| cg18801045 | DAP          | 5  | 0.00154244 | 0.259126717 | 0.502091815 |
| cg19633004 | DAP          | 5  | 0.00757515 | 0.207599244 | 0.391402408 |
| cg05473987 | DAP          | 5  | 0.00515935 | 0.4015588   | 0.560990136 |



|            |            |    |            |             |             |
|------------|------------|----|------------|-------------|-------------|
| cg24754277 | DAPK1      | 9  | 0.0170157  | 0.232620224 | 0.352127412 |
| cg16447058 | DAPK2      | 15 | 0.00609534 | 0.193497237 | 0.347573222 |
| cg02872476 | DBNDD1     | 16 | 0.00059935 | 0.312611309 | 0.514495982 |
| cg20739396 | DCAF15     | 19 | 0.01456475 | 0.501221731 | 0.645877594 |
| cg03938800 | DCAF6;DCAF | 1  | 0.00555755 | 0.71428963  | 0.861574668 |
| cg16177647 | DKAKD;DKAK | 17 | 3.77E-05   | 0.373557115 | 0.620680113 |
| cg26730025 | DKAKD;DKAK | 17 | 0.03301683 | 0.114769633 | 0.217578132 |
| cg12226735 | DCBLD2     | 3  | 0.00394117 | 0.479980668 | 0.641637447 |
| cg16080643 | DCC        | 18 | 0.00981552 | 0.105167506 | 0.224644267 |
| cg23173301 | DCHS1      | 11 | 0.00112584 | 0.30579213  | 0.492464357 |
| cg09605634 | DCLK1      | 13 | 0.00637635 | 0.14986222  | 0.309480354 |
| cg22806908 | DCP1A      | 3  | 0.00022725 | 0.391241584 | 0.649767992 |
| cg07039975 | DCTN1;DCTN | 2  | 0.02356749 | 0.311518344 | 0.44270828  |
| cg20202112 | DCTN1;DCTN | 2  | 0.00194303 | 0.275223544 | 0.418156582 |
| cg01772663 | DCTN6      | 8  | 0.01721019 | 0.451134891 | 0.608959823 |
| cg26767593 | DCTN6      | 8  | 0.01888804 | 0.387694701 | 0.519049375 |
| cg03941745 | DCTPP1     | 16 | 0.02457281 | 0.544110506 | 0.648938426 |
| cg21238257 | DCUN1D2    | 13 | 0.00838517 | 0.702437022 | 0.820918737 |
| cg10810378 | DCUN1D2    | 13 | 4.98E-05   | 0.662230086 | 0.776417616 |
| cg01145245 | DCUN1D3    | 16 | 0.02128466 | 0.112926601 | 0.249827933 |
| cg01820584 | DCUN1D4;DC | 4  | 0.00117165 | 0.36860926  | 0.649314535 |
| cg04749306 | DDA1       | 19 | 0.01384737 | 0.194304668 | 0.321334203 |
| cg25095032 | DDAH2      | 6  | 0.00067023 | 0.239231304 | 0.38151664  |
| cg04074004 | DDAH2      | 6  | 0.00994401 | 0.321088193 | 0.44594324  |
| cg01066220 | DDAH2      | 6  | 0.02064715 | 0.405900777 | 0.512266602 |
| cg20147224 | DDB2       | 11 | 0.04753207 | 0.077030573 | 0.180687163 |
| cg10771650 | DDR1       | 6  | 0.0017168  | 0.352282432 | 0.546505514 |
| cg19215110 | DDR1;DDR1  | 6  | 0.01216278 | 0.238846233 | 0.383347941 |
| cg16707952 | DDR1;DDR1  | 6  | 0.0161352  | 0.49682024  | 0.637727204 |
| cg12768993 | DDX10      | 11 | 0.00436007 | 0.64562134  | 0.78423805  |
| cg07194374 | DDX24      | 14 | 0.00139299 | 0.462199841 | 0.649070757 |
| cg12499311 | DDX46      | 5  | 0.03596887 | 0.134526546 | 0.276247252 |
| cg14548777 | DDX5       | 17 | 0.03037928 | 0.167154899 | 0.295809922 |
| cg09375756 | DEAF1      | 11 | 0.00116708 | 0.374547514 | 0.604273258 |
| cg21156386 | DEAF1      | 11 | 0.01185514 | 0.302066993 | 0.470282544 |
| cg13569700 | DEAF1      | 11 | 0.00245257 | 0.671632189 | 0.792461542 |
| cg04761824 | DEC1       | 9  | 0.01782241 | 0.536209486 | 0.653986757 |
| cg13220900 | DEF6       | 6  | 0.00177811 | 0.275210863 | 0.388860274 |
| cg26894841 | DEF8;DEF8  | 16 | 0.03488407 | 0.408210956 | 0.525400817 |
| cg19592003 | DEFB114    | 6  | 0.04467914 | 0.720685132 | 0.839336807 |
| cg13618623 | DENND1A;DE | 9  | 0.03117549 | 0.254477945 | 0.41356404  |
| cg08379738 | DENND1C    | 19 | 0.00421359 | 0.300329702 | 0.469095358 |
| cg14798653 | DENND1C    | 19 | 0.00197009 | 0.272308958 | 0.39477905  |
| cg08319291 | DENND2A    | 7  | 0.00011244 | 0.60031484  | 0.705868747 |
| cg26518580 | DENND2D    | 1  | 0.00468356 | 0.431197382 | 0.581861659 |
| cg21442881 | DENND3     | 8  | 0.00370094 | 0.350717053 | 0.542756289 |

|            |              |    |            |             |             |
|------------|--------------|----|------------|-------------|-------------|
| cg07580128 | DENND3       | 8  | 0.00222748 | 0.680366395 | 0.80153333  |
| cg08602861 | DENND3       | 8  | 0.00850201 | 0.496577208 | 0.600925687 |
| cg07428496 | DERL1;DERL1  | 8  | 0.00729124 | 0.633770812 | 0.766821622 |
| cg09622420 | DEXI         | 16 | 0.00416057 | 0.577912227 | 0.683399451 |
| cg12744321 | DFFB         | 1  | 0.02669496 | 0.415959042 | 0.540817084 |
| cg17790129 | DFNA5;DFNA   | 7  | 0.01107216 | 0.141505232 | 0.299912557 |
| cg25577212 | DFNA5;DFNA   | 7  | 0.01014474 | 0.159586503 | 0.294549624 |
| cg13826055 | DFNB31;DFN   | 9  | 0.00093983 | 0.457282876 | 0.742108994 |
| cg22126047 | DGCR9        | 22 | 0.00451777 | 0.462610875 | 0.591367655 |
| cg07679948 | DGKA;DGKA;   | 12 | 0.01938417 | 0.308783326 | 0.42422978  |
| cg25107522 | DGKD;DGKD    | 2  | 0.0103774  | 0.125724139 | 0.277192105 |
| cg23224619 | DGKD;DGKD    | 2  | 0.01256087 | 0.350322572 | 0.485886033 |
| cg08051105 | DGKD;DGKD    | 2  | 0.00047682 | 0.472428658 | 0.582245714 |
| cg15815084 | DGKE         | 17 | 0.03421872 | 0.275025916 | 0.401693711 |
| cg22718636 | DGKQ         | 4  | 0.01986535 | 0.185774817 | 0.290512611 |
| cg08971637 | DGUOK;DGU    | 2  | 0.01229707 | 0.555972218 | 0.659109533 |
| cg10523319 | DHRS3        | 1  | 0.00039956 | 0.634606924 | 0.788955579 |
| cg16432031 | DHRS3        | 1  | 0.01481001 | 0.501098726 | 0.611698958 |
| cg00352872 | DHRS7C       | 17 | 0.02073844 | 0.153871328 | 0.283318092 |
| cg14777519 | DHX30;DHX3   | 3  | 0.00216283 | 0.314673119 | 0.474781635 |
| cg15085006 | DHX30;DHX3   | 3  | 0.03319268 | 0.466121414 | 0.573720833 |
| cg18062196 | DHX40;DHX4   | 17 | 0.03939452 | 0.56086668  | 0.683581741 |
| cg20592691 | DIAPH3;DIAP  | 13 | 0.0163759  | 0.422983646 | 0.606500387 |
| cg23899649 | DICER1;DICEI | 14 | 0.00227306 | 0.616786152 | 0.771537427 |
| cg10948630 | DICER1;DICEI | 14 | 0.00281205 | 0.654246577 | 0.808861156 |
| cg23488578 | DICER1;DICEI | 14 | 0.02016693 | 0.145293422 | 0.262420921 |
| cg20517784 | DIP2C        | 10 | 4.98E-05   | 0.479426071 | 0.720226858 |
| cg17242812 | DIP2C        | 10 | 0.00616796 | 0.594101593 | 0.825476793 |
| cg25301103 | DIP2C        | 10 | 0.00127243 | 0.602354855 | 0.820465766 |
| cg09782637 | DIP2C        | 10 | 0.00778827 | 0.52030014  | 0.7357266   |
| cg26782150 | DIP2C        | 10 | 0.00520043 | 0.198781427 | 0.398612083 |
| cg11423998 | DIP2C        | 10 | 0.00195944 | 0.593246854 | 0.786084716 |
| cg11081275 | DIP2C        | 10 | 0.00040933 | 0.235746089 | 0.421160805 |
| cg04720116 | DIP2C        | 10 | 0.00305422 | 0.486549033 | 0.668566265 |
| cg17608529 | DIP2C        | 10 | 0.00444092 | 0.315323247 | 0.494596953 |
| cg08784934 | DIP2C        | 10 | 0.00024788 | 0.414498197 | 0.593563942 |
| cg04806237 | DIP2C        | 10 | 0.01600952 | 0.701189262 | 0.869168612 |
| cg17905091 | DIP2C        | 10 | 0.02082966 | 0.445782382 | 0.613465815 |
| cg13477178 | DIP2C        | 10 | 0.00114145 | 0.202578335 | 0.370043702 |
| cg10441401 | DIP2C        | 10 | 0.00293974 | 0.225703058 | 0.391184967 |
| cg06492521 | DIP2C        | 10 | 0.0257726  | 0.423950372 | 0.589196905 |
| cg00590260 | DIP2C        | 10 | 0.00037718 | 0.188519598 | 0.353251725 |
| cg27159421 | DIP2C        | 10 | 0.00118207 | 0.549432712 | 0.713715181 |
| cg09961254 | DIP2C        | 10 | 0.00279677 | 0.249325048 | 0.413204079 |
| cg26511507 | DIP2C        | 10 | 0.00920335 | 0.158241574 | 0.308823577 |
| cg01361261 | DIP2C        | 10 | 0.00324171 | 0.531390385 | 0.681265215 |

|            |              |    |            |             |             |
|------------|--------------|----|------------|-------------|-------------|
| cg20251943 | DIP2C        | 10 | 0.00652965 | 0.284763472 | 0.4338463   |
| cg11468148 | DIP2C        | 10 | 0.00359176 | 0.265437788 | 0.411585194 |
| cg05005968 | DIP2C        | 10 | 0.02127546 | 0.109319426 | 0.252077349 |
| cg12531838 | DIP2C        | 10 | 0.00303036 | 0.169597956 | 0.308472526 |
| cg08306029 | DIP2C        | 10 | 0.00405153 | 0.638831031 | 0.776819528 |
| cg04248461 | DIP2C        | 10 | 0.00215379 | 0.182968606 | 0.314696407 |
| cg17861458 | DIP2C        | 10 | 0.00378545 | 0.520450519 | 0.645613135 |
| cg13387972 | DIP2C        | 10 | 0.00114145 | 0.53481505  | 0.657981067 |
| cg08079763 | DIP2C        | 10 | 0.00643729 | 0.270370173 | 0.392434388 |
| cg06156195 | DIP2C        | 10 | 0.00332182 | 0.602996645 | 0.722606613 |
| cg15584954 | DIP2C        | 10 | 0.03189442 | 0.565323385 | 0.676672067 |
| cg26406407 | DIP2C        | 10 | 0.00437409 | 0.464753183 | 0.576052448 |
| cg24502027 | DIP2C        | 10 | 0.00044465 | 0.158806244 | 0.269198927 |
| cg01272967 | DIP2C        | 10 | 0.00180723 | 0.54786062  | 0.658059844 |
| cg25297146 | DIP2C        | 10 | 0.00016652 | 0.795801341 | 0.904583576 |
| cg18442019 | DIP2C        | 10 | 0.04106778 | 0.485150096 | 0.593665286 |
| cg02122937 | DIP2C        | 10 | 0.00790208 | 0.652096926 | 0.758993691 |
| cg20471927 | DIP2C        | 10 | 0.00225599 | 0.41326416  | 0.51347839  |
| cg15713378 | DIP2C;C10ori | 10 | 0.00104891 | 0.453052622 | 0.601074075 |
| cg13660126 | DIP2C;C10ori | 10 | 0.01295548 | 0.48160335  | 0.62636636  |
| cg15516835 | DIP2C;C10ori | 10 | 0.00886583 | 0.151194268 | 0.290045312 |
| cg16682227 | DIRAS3       | 1  | 0.04523771 | 0.329851872 | 0.520273867 |
| cg07934818 | DIRC3        | 2  | 0.00030589 | 0.633308577 | 0.778464305 |
| cg24980995 | DIRC3        | 2  | 0.01017869 | 0.182085307 | 0.287560063 |
| cg19561615 | DIS3L        | 15 | 0.03977121 | 0.489593519 | 0.596593426 |
| cg13952483 | DISP1;DISP1  | 1  | 0.01918216 | 0.10962827  | 0.219610895 |
| cg10942056 | DISP1;DISP1  | 1  | 0.02358182 | 0.136871371 | 0.243474217 |
| cg03803789 | DIXDC1;DIXD  | 11 | 0.00195725 | 0.15700775  | 0.361831466 |
| cg18962750 | DIXDC1;DIXD  | 11 | 0.01874221 | 0.598998231 | 0.725314708 |
| cg05415408 | DKFZP586114  | 7  | 0.03769143 | 0.745942291 | 0.859260943 |
| cg26148020 | DLC1         | 8  | 0.02500717 | 0.193750692 | 0.365787591 |
| cg17989952 | DLC1;DLC1;D  | 8  | 0.00396543 | 0.42907455  | 0.644889795 |
| cg16749785 | DLC1;DLC1;D  | 8  | 0.01058354 | 0.528990553 | 0.67366347  |
| cg20607577 | DLC1;DLC1;D  | 8  | 0.0240206  | 0.448885721 | 0.582306851 |
| cg08274637 | DLEU7        | 13 | 0.00305422 | 0.196805131 | 0.302671981 |
| cg13489576 | DLG1;DLG1    | 3  | 0.0177174  | 0.63780863  | 0.752211481 |
| cg24182581 | DLG2;DLG2;L  | 11 | 0.01398076 | 0.367540797 | 0.53046798  |
| cg25856632 | DLG4;DLG4    | 17 | 0.00207283 | 0.33996581  | 0.455411801 |
| cg27328839 | DLG5         | 10 | 0.00168527 | 0.642199067 | 0.771161576 |
| cg23042540 | DLGAP2       | 8  | 0.00305184 | 0.226615251 | 0.39161616  |
| cg20705812 | DLGAP2       | 8  | 0.00030748 | 0.425691001 | 0.5396903   |
| cg07422669 | DLGAP2       | 8  | 0.03056982 | 0.542932219 | 0.650363593 |
| cg13494348 | DLL1         | 6  | 0.00657201 | 0.451093468 | 0.606729013 |
| cg06432036 | DLL1         | 6  | 0.00149393 | 0.621733883 | 0.728988682 |
| cg14157570 | DLL4         | 15 | 0.00087084 | 0.189010942 | 0.417204112 |
| cg08101303 | DLX5         | 7  | 0.02944385 | 0.21660495  | 0.317117401 |

|            |            |    |            |             |             |
|------------|------------|----|------------|-------------|-------------|
| cg16686429 | DMPK;DMPK  | 19 | 0.0036499  | 0.277728472 | 0.389455108 |
| cg23213876 | DMRTB1     | 1  | 0.030941   | 0.488848105 | 0.610640109 |
| cg20451636 | DMWD       | 19 | 0.00065412 | 0.631376796 | 0.766103072 |
| cg22798468 | DNAH14;DN  | 1  | 0.00773535 | 0.71905965  | 0.849554863 |
| cg00204249 | DNAH17     | 17 | 0.00099477 | 0.444671479 | 0.628750436 |
| cg00735218 | DNAH17     | 17 | 0.02076695 | 0.418804737 | 0.572294131 |
| cg00913879 | DNAH17     | 17 | 0.01478818 | 0.479711195 | 0.623770348 |
| cg05361750 | DNAH17     | 17 | 0.00549253 | 0.654492258 | 0.771483168 |
| cg21631150 | DNAJB11    | 3  | 0.02225155 | 0.554660851 | 0.698377787 |
| cg21554771 | DNAJB2;DNA | 2  | 0.03471576 | 0.728444823 | 0.857776691 |
| cg10161638 | DNAJB6     | 7  | 0.00271384 | 0.347718209 | 0.50504343  |
| cg16081609 | DNAJC1     | 10 | 0.03829163 | 0.42913355  | 0.547896042 |
| cg02993722 | DNAJC11    | 1  | 0.00033683 | 0.37909333  | 0.584738588 |
| cg16842483 | DNAJC13    | 3  | 0.04389845 | 0.570779453 | 0.683968379 |
| cg25700533 | DNAJC17;C1 | 15 | 0.00614086 | 0.095515552 | 0.255999503 |
| cg11174089 | DNAJC3     | 13 | 0.01538294 | 0.578922113 | 0.756278381 |
| cg14830003 | DNALI1     | 1  | 0.00162771 | 0.209762615 | 0.349907583 |
| cg09764984 | DNASE1     | 16 | 0.00832537 | 0.168743489 | 0.374697905 |
| cg27552378 | DNASE1     | 16 | 0.00176071 | 0.232996618 | 0.382343171 |
| cg16656316 | DNER       | 2  | 0.00703278 | 0.706655064 | 0.821559067 |
| cg23068797 | DNM2;MIR1  | 19 | 0.00066642 | 0.238922861 | 0.358281558 |
| cg23009818 | DNMT3A;DN  | 2  | 0.00295532 | 0.236241358 | 0.341625273 |
| cg06748978 | DNMT3A;DN  | 2  | 0.0018962  | 0.35061452  | 0.526262524 |
| cg20702417 | DNMT3A;DN  | 2  | 0.00097696 | 0.522015325 | 0.627180646 |
| cg27482168 | DNPEP      | 2  | 0.02664418 | 0.355184697 | 0.476072649 |
| cg13444670 | DNTT;DNTT  | 10 | 0.03018894 | 0.476021003 | 0.602229768 |
| cg18565023 | DOC2B      | 17 | 0.0306846  | 0.490925428 | 0.591466834 |
| cg26717418 | DOCK1      | 10 | 0.00251006 | 0.442543348 | 0.595290123 |
| cg02614045 | DOCK2      | 5  | 0.01650887 | 0.387096862 | 0.587571052 |
| cg16797901 | DOCK4      | 7  | 0.01941574 | 0.141579837 | 0.273924475 |
| cg01205935 | DOCK9;DOCK | 13 | 0.0418906  | 0.117982085 | 0.22792777  |
| cg11800635 | DOK1       | 2  | 0.00484804 | 0.236147068 | 0.340611844 |
| cg07280936 | DOK7;DOK7  | 4  | 0.00069262 | 0.177970777 | 0.316405077 |
| cg14293102 | DOT1L      | 19 | 0.00030339 | 0.57648386  | 0.760782641 |
| cg21725158 | DOT1L      | 19 | 0.00283619 | 0.418013215 | 0.566504866 |
| cg24430201 | DOT1L      | 19 | 0.00725583 | 0.513807941 | 0.615514349 |
| cg09609051 | DPF2       | 11 | 0.02792001 | 0.193823229 | 0.315886583 |
| cg01901381 | DPF3       | 14 | 0.00175279 | 0.490943844 | 0.628295629 |
| cg09350880 | DPF3       | 14 | 0.00577668 | 0.275123044 | 0.411073652 |
| cg06776201 | DPF3       | 14 | 0.00922157 | 0.231603295 | 0.366514275 |
| cg13588403 | DPF3       | 14 | 0.04286681 | 0.229970901 | 0.338180563 |
| cg04122918 | DPF3       | 14 | 0.04352285 | 0.128163705 | 0.228957173 |
| cg00014900 | DPH2;DPH2  | 1  | 0.00043188 | 0.655928822 | 0.769878411 |
| cg18317135 | DPP9       | 19 | 0.00237209 | 0.428959792 | 0.542069546 |
| cg23057232 | DPYD       | 1  | 0.02729644 | 0.230069948 | 0.393247236 |
| cg26836456 | DPYD;DPYD  | 1  | 0.03237381 | 0.677629889 | 0.782838336 |

|            |             |    |            |             |             |
|------------|-------------|----|------------|-------------|-------------|
| cg03193505 | DPYS        | 8  | 0.00248345 | 0.671093851 | 0.798882745 |
| cg04185123 | DPYSL3      | 5  | 0.02728831 | 0.608539419 | 0.729755644 |
| cg16649728 | DRAP1;C11o  | 11 | 0.00076551 | 0.277561373 | 0.397832695 |
| cg14603539 | DSCAM       | 21 | 0.01079668 | 0.297143738 | 0.434196159 |
| cg22778797 | DSCR8;DSCR: | 21 | 0.00239377 | 0.628289003 | 0.731509923 |
| cg05629781 | DTNA;DTNA;  | 18 | 0.01448983 | 0.124496185 | 0.240389384 |
| cg12561125 | DTX3;GEFT   | 12 | 0.01916167 | 0.329544301 | 0.458353231 |
| cg05941778 | DUSP10;DUS  | 1  | 0.03167759 | 0.684762893 | 0.80300589  |
| cg03913136 | DUSP14      | 17 | 0.00927711 | 0.731762291 | 0.863669544 |
| cg16328400 | DYNC1H1     | 14 | 0.00076898 | 0.654990285 | 0.761760618 |
| cg14069214 | DYNLL1;DYN  | 12 | 0.04251546 | 0.15622924  | 0.26933679  |
| cg01670714 | DYNLRB1     | 20 | 0.02783273 | 0.374312046 | 0.482735461 |
| cg03553434 | DYRK1A;DYR  | 21 | 0.00303012 | 0.79570445  | 0.896353051 |
| cg12245706 | DYSF;DYSF;D | 2  | 0.00030197 | 0.33732722  | 0.595502521 |
| cg14196395 | DYSF;DYSF;D | 2  | 0.00251006 | 0.370330562 | 0.57979661  |
| cg01171786 | DYSF;DYSF;D | 2  | 0.03890911 | 0.288516676 | 0.446337606 |
| cg14689456 | DYSF;DYSF;D | 2  | 0.02803426 | 0.575437347 | 0.701963228 |
| cg00477086 | DYSF;DYSF;D | 2  | 0.00793491 | 0.143614976 | 0.247865156 |
| cg22480875 | E2F7        | 12 | 0.03166736 | 0.617776789 | 0.738380395 |
| cg09172244 | EBF1        | 5  | 0.0034179  | 0.325723634 | 0.55619392  |
| cg11690724 | EBF1        | 5  | 0.00107813 | 0.564770698 | 0.727530424 |
| cg03774288 | EBF3        | 10 | 0.00249428 | 0.308710957 | 0.491712342 |
| cg20161275 | EBF3        | 10 | 0.01348213 | 0.254643209 | 0.432034187 |
| cg27417526 | EBF3        | 10 | 0.0038042  | 0.550633468 | 0.719309141 |
| cg23250262 | EBF3        | 10 | 0.02420833 | 0.258221563 | 0.407195286 |
| cg16093296 | EBF3        | 10 | 0.02621259 | 0.701638236 | 0.835110544 |
| cg12509733 | EBF3        | 10 | 0.01889567 | 0.555177657 | 0.673449888 |
| cg17245223 | EBF3        | 10 | 0.00769848 | 0.183813924 | 0.301906785 |
| cg11834658 | ECE1;ECE1;E | 1  | 0.00029687 | 0.502835997 | 0.640565917 |
| cg13562122 | ECE1;ECE1;E | 1  | 0.0007985  | 0.353494897 | 0.536881987 |
| cg24767131 | ECEL1P2     | 2  | 0.00150188 | 0.28861779  | 0.429441795 |
| cg02812891 | ECEL1P2     | 2  | 0.00307718 | 0.301272579 | 0.426925149 |
| cg13138089 | ECEL1P2     | 2  | 0.00158143 | 0.409482447 | 0.531225302 |
| cg21221557 | EDIL3       | 5  | 0.00085003 | 0.536158834 | 0.75550352  |
| cg16306043 | EDIL3       | 5  | 0.00916855 | 0.225651376 | 0.390604102 |
| cg24182107 | EEF1DP3     | 13 | 0.03873108 | 0.60851967  | 0.728763896 |
| cg00769112 | EEF2        | 19 | 0.0146684  | 0.548611971 | 0.660736472 |
| cg14644846 | EEFSEC      | 3  | 0.01731606 | 0.150501404 | 0.252872513 |
| cg05423018 | EEPD1       | 7  | 5.39E-05   | 0.256728481 | 0.389776346 |
| cg08079806 | EFEMP2      | 11 | 0.01636294 | 0.627219506 | 0.727752527 |
| cg18454133 | EF3;EF3     | 14 | 0.00323826 | 0.223425714 | 0.399265852 |
| cg16681436 | EGFL8       | 6  | 0.00283459 | 0.197293735 | 0.343891324 |
| cg00359087 | EGFL8       | 6  | 0.00081283 | 0.422641283 | 0.568178    |
| cg26785234 | EGFL8       | 6  | 0.03454353 | 0.468089316 | 0.584677508 |
| cg07754347 | EGFL8       | 6  | 5.79E-05   | 0.786335905 | 0.888059597 |
| cg27230140 | EGFL8       | 6  | 0.00253886 | 0.57553876  | 0.676808733 |

|            |              |    |            |             |             |
|------------|--------------|----|------------|-------------|-------------|
| cg26834504 | EHBP1;EHBP   | 2  | 0.00376272 | 0.752113288 | 0.879940716 |
| cg12017745 | EHBP1L1      | 11 | 0.01048046 | 0.175653825 | 0.29902364  |
| cg06154903 | EHD1         | 11 | 0.00527353 | 0.269235962 | 0.382962642 |
| cg23121787 | EHD4         | 15 | 0.00431273 | 0.372841725 | 0.522891359 |
| cg14064959 | EHMT1        | 9  | 0.00050919 | 0.488873925 | 0.715254977 |
| cg21195984 | EHMT1        | 9  | 0.00074918 | 0.263110211 | 0.455423523 |
| cg22810281 | EHMT2;EHM    | 6  | 0.00637635 | 0.480717561 | 0.614123463 |
| cg25853673 | EHMT2;EHM    | 6  | 0.00097949 | 0.447750073 | 0.571537656 |
| cg19770715 | EHMT2;SLC4   | 6  | 6.53E-05   | 0.295717716 | 0.486271082 |
| cg24493649 | EHMT2;SLC4   | 6  | 0.0061569  | 0.201454927 | 0.37670929  |
| cg24251448 | EIF2C2;EIF2C | 8  | 0.00042618 | 0.5510541   | 0.746946346 |
| cg25922279 | EIF2C2;EIF2C | 8  | 0.00010095 | 0.479503894 | 0.672252287 |
| cg18999451 | EIF2C2;EIF2C | 8  | 0.0232098  | 0.422837856 | 0.577558012 |
| cg13582226 | EIF2C2;EIF2C | 8  | 0.00028063 | 0.49802686  | 0.64786151  |
| cg15936375 | EIF2C2;EIF2C | 8  | 0.00041709 | 0.478169906 | 0.622992443 |
| cg02911270 | EIF2C2;EIF2C | 8  | 0.00580368 | 0.507723673 | 0.650931175 |
| cg07701049 | EIF2C2;EIF2C | 8  | 0.0013563  | 0.177599705 | 0.29628893  |
| cg03172341 | EIF2C2;EIF2C | 8  | 0.00149959 | 0.639888294 | 0.755030047 |
| cg10720646 | EIF2C2;EIF2C | 8  | 0.02718027 | 0.41838367  | 0.532773234 |
| cg23119628 | EIF2C2;EIF2C | 8  | 0.04658725 | 0.290643152 | 0.392386155 |
| cg11453190 | EIF2S2       | 20 | 0.01667039 | 0.543275093 | 0.670784369 |
| cg21301240 | EIF3H        | 8  | 0.00331497 | 0.52457107  | 0.713905602 |
| cg17887364 | EIF4EBP1     | 8  | 0.00230751 | 0.225893402 | 0.431829626 |
| cg18429196 | EIF4H;EIF4H  | 7  | 0.001882   | 0.390302236 | 0.552463391 |
| cg17868307 | EIF4H;EIF4H  | 7  | 0.03777302 | 0.559107541 | 0.682693722 |
| cg16450309 | EIF5A2       | 3  | 0.00022984 | 0.286478001 | 0.441523935 |
| cg12691679 | ELF1         | 13 | 0.04666233 | 0.418141282 | 0.546387786 |
| cg03940407 | ELF2         | 4  | 0.04126857 | 0.471573228 | 0.640525072 |
| cg16986578 | ELF3;ELF3    | 1  | 0.00565241 | 0.171020628 | 0.304158546 |
| cg05653018 | ELF3;ELF3    | 1  | 0.00035703 | 0.110010752 | 0.241662702 |
| cg07897871 | ELF3;ELF3;EL | 1  | 0.00012533 | 0.49722061  | 0.712378041 |
| cg02076020 | ELF3;ELF3;EL | 1  | 0.00247399 | 0.314145448 | 0.505582387 |
| cg26328757 | ELF3;ELF3;EL | 1  | 0.00323249 | 0.485487804 | 0.632726887 |
| cg10631356 | ELF5;ELF5    | 11 | 0.0307719  | 0.147464481 | 0.294099194 |
| cg12967164 | ELFN1        | 7  | 3.77E-05   | 0.305028624 | 0.489357984 |
| cg08410691 | ELFN1        | 7  | 0.00581964 | 0.441332572 | 0.548170977 |
| cg26287309 | ELFN2        | 22 | 0.00266938 | 0.377363815 | 0.489764359 |
| cg08721338 | ELMO3        | 16 | 0.01573592 | 0.236235618 | 0.368851968 |
| cg06494642 | ELMO3        | 16 | 0.00307609 | 0.197469529 | 0.311685512 |
| cg07716847 | ELMO3        | 16 | 0.00305538 | 0.142337479 | 0.248109786 |
| cg22925553 | ELMOD2       | 4  | 0.00921957 | 0.86324707  | 0.966338607 |
| cg25729687 | ELN;ELN;ELN  | 7  | 0.01557267 | 0.128020712 | 0.289775235 |
| cg15983182 | ELN;ELN;ELN  | 7  | 0.02017174 | 0.118874859 | 0.273044524 |
| cg09777237 | ELN;ELN;ELN  | 7  | 0.00215713 | 0.479157182 | 0.63179794  |
| cg16867657 | ELOVL2       | 6  | 0.00222642 | 0.247614743 | 0.367028848 |
| cg17363943 | ELOVL6;ELOV  | 4  | 0.01094236 | 0.20606304  | 0.373461895 |

|            |             |    |            |             |             |
|------------|-------------|----|------------|-------------|-------------|
| cg13352306 | EML3;ROM1   | 11 | 0.00030405 | 0.263616593 | 0.432702444 |
| cg27178401 | EMP2        | 16 | 0.02512915 | 0.183239732 | 0.284941486 |
| cg18449135 | EMP3        | 19 | 0.01551227 | 0.186804679 | 0.287641495 |
| cg07790831 | ENAH;ENAH   | 1  | 0.00969058 | 0.22176692  | 0.329147005 |
| cg14055970 | ENG;ENG     | 9  | 0.02654074 | 0.500319193 | 0.650742792 |
| cg00807389 | ENGASE      | 17 | 0.00446383 | 0.515493911 | 0.621687056 |
| cg02865832 | ENGASE      | 17 | 0.01355893 | 0.475827805 | 0.581332261 |
| cg13777984 | ENOX1;ENOX  | 13 | 0.02444089 | 0.174261015 | 0.371572509 |
| cg00049892 | ENPP1       | 6  | 0.00823037 | 0.398245599 | 0.611141086 |
| cg18796704 | ENPP1       | 6  | 0.01410653 | 0.136179104 | 0.284926602 |
| cg19270309 | ENPP7       | 17 | 0.00770748 | 0.293376087 | 0.419262781 |
| cg05629774 | EP400       | 12 | 0.00377309 | 0.462943561 | 0.599066573 |
| cg27007356 | EP400       | 12 | 0.00128046 | 0.584155329 | 0.708960455 |
| cg09075307 | EP400       | 12 | 0.00104901 | 0.644912049 | 0.756568309 |
| cg02148800 | EP400       | 12 | 0.00649647 | 0.478830345 | 0.587510923 |
| cg00097800 | EPAS1       | 2  | 0.02731808 | 0.341599764 | 0.51595764  |
| cg12608132 | EPAS1       | 2  | 0.00042464 | 0.247394072 | 0.402460918 |
| cg13997788 | EPAS1       | 2  | 0.00501233 | 0.298649143 | 0.452820403 |
| cg10507988 | EPAS1       | 2  | 0.03495988 | 0.442626121 | 0.551999526 |
| cg22423984 | EPB41L1     | 20 | 0.01491285 | 0.13817936  | 0.287803946 |
| cg04599041 | EPB41L2;EPB | 6  | 0.01953977 | 0.479805976 | 0.612769653 |
| cg06458086 | EPB41L2;EPB | 6  | 0.00042729 | 0.330697007 | 0.455802449 |
| cg14090400 | EPB41L3     | 18 | 0.02019759 | 0.636835624 | 0.803492429 |
| cg23205365 | EPB41L5     | 2  | 0.00247425 | 0.148880559 | 0.336238237 |
| cg16678564 | EPB49;EPB49 | 8  | 3.61E-05   | 0.396746027 | 0.582059157 |
| cg10970614 | EPC2        | 2  | 0.0032554  | 0.829627246 | 0.935083107 |
| cg09176402 | EPHA10      | 1  | 0.02187264 | 0.760085188 | 0.861096767 |
| cg15517098 | EPHA2       | 1  | 0.00710209 | 0.754811191 | 0.87153491  |
| cg16448847 | EPHB1       | 3  | 0.00653478 | 0.211940111 | 0.335988361 |
| cg02974898 | EPHB2;EPHB2 | 1  | 0.02769821 | 0.110312958 | 0.280400094 |
| cg18156963 | EPHB2;EPHB2 | 1  | 0.03656148 | 0.211208288 | 0.378975855 |
| cg13694876 | EPHB3       | 3  | 0.01965511 | 0.466598736 | 0.619776901 |
| cg15334250 | EPHB3       | 3  | 0.04564389 | 0.387973874 | 0.511320505 |
| cg20438472 | EPHB3       | 3  | 0.00210529 | 0.60816887  | 0.718458609 |
| cg01888306 | EPHB3       | 3  | 0.00760619 | 0.576371472 | 0.686577427 |
| cg22493616 | EPHB4       | 7  | 0.00078117 | 0.463855197 | 0.593058731 |
| cg10350880 | EPHB4       | 7  | 0.03591496 | 0.247920116 | 0.354253496 |
| cg22303758 | EPHX2       | 8  | 0.03323248 | 0.353416011 | 0.487644535 |
| cg24315340 | EPM2A;EPM2A | 6  | 0.03746866 | 0.198399146 | 0.32775079  |
| cg14173476 | EPN2;EPN2;E | 17 | 0.00054402 | 0.242557656 | 0.425703623 |
| cg17742418 | EPN2;EPN2;E | 17 | 4.33E-05   | 0.655781341 | 0.798001475 |
| cg25673598 | EPN2;EPN2;E | 17 | 0.00496621 | 0.15743081  | 0.292910548 |
| cg16597993 | EPS15L1     | 19 | 5.79E-05   | 0.214972496 | 0.370339748 |
| cg03332546 | EPS15L1     | 19 | 0.01697425 | 0.113041926 | 0.255616473 |
| cg04587886 | EPS8L2      | 11 | 7.44E-05   | 0.595918547 | 0.718584976 |
| cg17649115 | EPS8L2      | 11 | 0.00247934 | 0.779917119 | 0.884958177 |

|            |              |    |            |             |             |
|------------|--------------|----|------------|-------------|-------------|
| cg06378010 | ERC1;ERC1;E  | 12 | 0.04893011 | 0.229916055 | 0.362979598 |
| cg17212420 | ERCC2;ERCC2  | 19 | 0.01046589 | 0.565572151 | 0.731369163 |
| cg08296903 | ERCC4        | 16 | 0.04464119 | 0.225368341 | 0.346931236 |
| cg21578987 | ERG;ERG      | 21 | 0.03385347 | 0.250059444 | 0.41448994  |
| cg14536431 | ERG;ERG      | 21 | 0.02663255 | 0.109588558 | 0.260961661 |
| cg15833565 | ERI3         | 1  | 0.00107356 | 0.202717961 | 0.364411276 |
| cg26393977 | ERLIN2       | 8  | 0.00539244 | 0.409565097 | 0.516866671 |
| cg02650323 | ERLIN2;ERLIN | 8  | 0.04132722 | 0.203616014 | 0.332193739 |
| cg06193232 | ERN1         | 17 | 0.00137786 | 0.216208735 | 0.400919016 |
| cg06159484 | ERRFI1       | 1  | 0.0010134  | 0.365880527 | 0.554134253 |
| cg15676711 | ERRFI1       | 1  | 0.01312149 | 0.457527222 | 0.580505447 |
| cg25338972 | ESR1         | 6  | 0.04485229 | 0.105322475 | 0.262051733 |
| cg09646983 | ESR1;ESR1    | 6  | 0.02550769 | 0.593079959 | 0.694093035 |
| cg07455133 | ESR1;ESR1;E  | 6  | 0.02229795 | 0.194908841 | 0.341494804 |
| cg00944421 | ESRP2        | 16 | 0.00130251 | 0.217660677 | 0.361906795 |
| cg05212892 | ESYT2        | 7  | 0.00064711 | 0.309736603 | 0.554325615 |
| cg07600623 | ESYT2        | 7  | 0.02204267 | 0.358891355 | 0.474045999 |
| cg22289694 | ETFA;ETFA    | 15 | 0.03300336 | 0.645962709 | 0.77801797  |
| cg02119577 | ETS2         | 21 | 0.0160284  | 0.275372463 | 0.397374845 |
| cg16354756 | ETV3;CYCSP5  | 1  | 0.01943353 | 0.518484669 | 0.632641215 |
| cg06390643 | ETV5         | 3  | 0.01614493 | 0.465177434 | 0.608843904 |
| cg03609488 | ETV6         | 12 | 0.02058512 | 0.114222865 | 0.216564503 |
| cg07019303 | ETV6         | 12 | 0.00613203 | 0.48495953  | 0.58727852  |
| cg20143393 | EVPL         | 17 | 0.02020228 | 0.690051889 | 0.795560657 |
| cg26889659 | EXOC2        | 6  | 0.00360008 | 0.168137736 | 0.335105659 |
| cg08460580 | EXOC2        | 6  | 0.00697048 | 0.608740001 | 0.732036203 |
| cg08882547 | EXOC3L2      | 19 | 0.00096158 | 0.178446585 | 0.326548049 |
| cg12009516 | EXOC3L2      | 19 | 0.00198166 | 0.249811628 | 0.395105809 |
| cg09450024 | EXOC3L2      | 19 | 0.00173032 | 0.163059809 | 0.306350182 |
| cg00449767 | EXOC3L2      | 19 | 0.00035687 | 0.288711947 | 0.403619486 |
| cg14876077 | EXOC3L2      | 19 | 0.00508215 | 0.223163594 | 0.334667829 |
| cg01565314 | EXOC3L2      | 19 | 0.00015308 | 0.179023148 | 0.286383982 |
| cg13654884 | EXOC6        | 10 | 0.01593079 | 0.59797084  | 0.708848912 |
| cg13314863 | EXOC6;EXOC   | 10 | 0.01296851 | 0.600621354 | 0.722063229 |
| cg11309785 | EXOC6B       | 2  | 0.0003561  | 0.240116273 | 0.477069974 |
| cg22271457 | EXT1         | 8  | 0.00068972 | 0.636222424 | 0.817792435 |
| cg24892992 | EXT1         | 8  | 0.0053542  | 0.471694678 | 0.647337647 |
| cg00332126 | EXT2;EXT2    | 11 | 0.01291694 | 0.231555983 | 0.373748306 |
| cg07551677 | EXTL3        | 8  | 0.00152272 | 0.673547182 | 0.820002931 |
| cg00550493 | EYS          | 6  | 0.00637775 | 0.181397878 | 0.344761725 |
| cg01860271 | EYS          | 6  | 0.03024261 | 0.684383138 | 0.785363532 |
| cg16349616 | EZR;EZR      | 6  | 0.00029265 | 0.624117788 | 0.727035385 |
| cg18868540 | F2           | 11 | 0.00195084 | 0.347381072 | 0.540613666 |
| cg07387634 | F3           | 1  | 0.01109657 | 0.206814466 | 0.309663099 |
| cg26667735 | FAAH         | 1  | 0.00078802 | 0.647579883 | 0.779374044 |
| cg07168328 | FAAH         | 1  | 0.00759687 | 0.299650874 | 0.420450194 |



|            |            |    |            |             |              |
|------------|------------|----|------------|-------------|--------------|
| cg05009047 | FAM100A    | 16 | 0.04893011 | 0.662069585 | 0.767983541  |
| cg18672389 | FAM101A    | 12 | 0.00024762 | 0.313235187 | 0.576545088  |
| cg14273093 | FAM101A    | 12 | 0.00410846 | 0.292639926 | 0.482484257  |
| cg18124134 | FAM101A    | 12 | 0.00062273 | 0.687111034 | 0.809564466  |
| cg05712979 | FAM101A    | 12 | 0.00253806 | 0.507320548 | 0.62454466   |
| cg01924493 | FAM101A    | 12 | 0.03321432 | 0.637120027 | 0.739336979  |
| cg13761284 | FAM102A;FA | 9  | 0.00030197 | 0.368844517 | 0.509776523  |
| cg13692655 | FAM102A;FA | 9  | 0.00091886 | 0.3416669   | 0.470009943  |
| cg08691577 | FAM105B    | 5  | 0.00650967 | 0.207656736 | 0.365255309  |
| cg12354318 | FAM107B    | 10 | 0.01173077 | 0.25199315  | 0.377887031  |
| cg03939371 | FAM108A1;F | 19 | 0.03206111 | 0.495685805 | 0.62132322   |
| cg08608727 | FAM109A    | 12 | 9.60E-05   | 0.567274182 | 0.679047892  |
| cg21184699 | FAM120A    | 9  | 0.00010867 | 0.669491075 | 0.817664262  |
| cg06381463 | FAM125B;FA | 9  | 0.00025542 | 0.411654723 | 0.647628299  |
| cg11970163 | FAM129A    | 1  | 0.01619517 | 0.426811942 | 0.581642579  |
| cg25182523 | FAM129A    | 1  | 0.01172301 | 0.352169401 | 0.486286823  |
| cg21279326 | FAM129A    | 1  | 0.03703531 | 0.808825014 | 0.927769721  |
| cg21169267 | FAM129B;FA | 9  | 0.00091576 | 0.365745209 | 0.526540004  |
| cg06712722 | FAM129B;FA | 9  | 0.027169   | 0.467733325 | 0.598529288  |
| cg14408339 | FAM129B;FA | 9  | 0.00205146 | 0.247928076 | 0.353120148  |
| cg17156402 | FAM131C    | 1  | 0.00014848 | 0.530797585 | 0.678353686  |
| cg07302959 | FAM133B;FA | 7  | 0.01570078 | 0.725332191 | 0.831289853  |
| cg19063834 | FAM134B;FA | 5  | 0.0224437  | 0.164549526 | 0.283039397  |
| cg13782092 | FAM13A;FAM | 4  | 0.00305069 | 0.499554028 | 0.689954757  |
| cg09717352 | FAM13A;FAM | 4  | 0.02671807 | 0.725973689 | 0.833574107  |
| cg04860977 | FAM155A    | 13 | 0.0022313  | 0.354042498 | 0.587984588  |
| cg26215399 | FAM160B2   | 8  | 0.00176071 | 0.372163302 | 0.547964268  |
| cg03520938 | FAM160B2   | 8  | 0.00406408 | 0.241250211 | 0.352095862  |
| cg06551905 | FAM167A    | 8  | 0.01302227 | 0.13285775  | 0.243931091  |
| cg21155609 | FAM167B    | 1  | 0.00207283 | 0.335669882 | 0.4661894    |
| cg16495818 | FAM168A    | 11 | 0.04833217 | 0.227339428 | 0.334824472  |
| cg04939326 | FAM168A    | 11 | 0.0374137  | 0.461312956 | 0.565757536  |
| cg11452043 | FAM168B    | 2  | 0.00093863 | 0.401827739 | 0.597976421  |
| cg01245667 | FAM169B    | 15 | 0.01292714 | 0.267400923 | 0.444584559  |
| cg16512990 | FAM170B    | 10 | 0.02362539 | 0.418157958 | 0.540355676  |
| cg12771178 | FAM170B    | 10 | 0.00240122 | 0.165921585 | 0.28730871   |
| cg27406618 | FAM170B;FA | 10 | 0.00350976 | 0.244264427 | 0.398746179  |
| cg18649133 | FAM172A;FA | 5  | 0.0115552  | 0.712466997 | 0.870067767  |
| cg01948367 | FAM172A;FA | 5  | 0.03111173 | 0.626829328 | 0.73495212   |
| cg16720807 | FAM176A;FA | 2  | 0.00691318 | 0.7206179   | 0.8654972    |
| cg22810403 | FAM176B    | 1  | 0.00512577 | 0.682930574 | 0.80492863   |
| cg18665384 | FAM177B    | 1  | 0.00868275 | 0.291233769 | 0.457546868  |
| cg05368724 | FAM178B;FA | 2  | 0.0005899  | 0.35024088  | 0.517485891  |
| cg26108017 | FAM178B;FA | 2  | 9.83E-05   | 0.445171701 | 0.562043214  |
| cg05557262 | FAM180A    | 7  | 0.00628018 | 0.648850079 | 0.759336226  |
| cg00005619 | FAM180B    | 11 | 0.00100406 | 0.253730189 | 0.4111046804 |

|            |            |    |            |             |             |
|------------|------------|----|------------|-------------|-------------|
| cg24657419 | FAM184A;FA | 6  | 0.0023772  | 0.56613694  | 0.708687396 |
| cg09608383 | FAM189A1   | 15 | 0.00917499 | 0.684696041 | 0.811414344 |
| cg26952618 | FAM18A;FAN | 16 | 0.0029475  | 0.15235248  | 0.264826019 |
| cg03309770 | FAM18A;FAN | 16 | 0.00108886 | 0.150109281 | 0.258628223 |
| cg12801917 | FAM18B2    | 17 | 0.00011374 | 0.247104265 | 0.387646932 |
| cg11117908 | FAM190A    | 4  | 0.03333689 | 0.534513377 | 0.646332336 |
| cg25790133 | FAM193A    | 4  | 0.00061419 | 0.275443757 | 0.546329817 |
| cg05949640 | FAM193A    | 4  | 0.00591777 | 0.301740875 | 0.488099911 |
| cg26981170 | FAM193A    | 4  | 0.02171015 | 0.244652342 | 0.399224665 |
| cg05083414 | FAM193A    | 4  | 0.01004736 | 0.227180537 | 0.375231069 |
| cg22980079 | FAM193A    | 4  | 0.00229327 | 0.624923962 | 0.734893521 |
| cg20163033 | FAM193A;FA | 4  | 5.22E-05   | 0.617705022 | 0.765719227 |
| cg05883695 | FAM198A    | 3  | 0.00480302 | 0.215141274 | 0.323340601 |
| cg16716189 | FAM19A3;FA | 1  | 0.00023272 | 0.307542972 | 0.429885164 |
| cg15187790 | FAM19A5    | 22 | 0.02439117 | 0.19217894  | 0.31437392  |
| cg19579080 | FAM20A     | 17 | 0.04488634 | 0.223890206 | 0.37467988  |
| cg08728302 | FAM20C     | 7  | 0.00048323 | 0.300399645 | 0.572283393 |
| cg25929664 | FAM20C     | 7  | 0.00092129 | 0.197857803 | 0.401908549 |
| cg27640234 | FAM20C     | 7  | 0.00189686 | 0.472221774 | 0.652238122 |
| cg24286414 | FAM20C     | 7  | 0.00146722 | 0.518975156 | 0.683780122 |
| cg26983907 | FAM20C     | 7  | 0.01871993 | 0.310052679 | 0.468060636 |
| cg23782833 | FAM20C     | 7  | 0.00053355 | 0.276249746 | 0.432588056 |
| cg05031931 | FAM20C     | 7  | 0.01283934 | 0.159212546 | 0.306934626 |
| cg18234533 | FAM20C     | 7  | 0.00025542 | 0.381612074 | 0.528810074 |
| cg04256674 | FAM20C     | 7  | 0.00304605 | 0.665031061 | 0.811876695 |
| cg00308560 | FAM20C     | 7  | 0.00041553 | 0.204725184 | 0.349445293 |
| cg12748511 | FAM20C     | 7  | 0.00283856 | 0.14029888  | 0.284536995 |
| cg19476741 | FAM20C     | 7  | 0.00043237 | 0.188842933 | 0.332183867 |
| cg11200568 | FAM20C     | 7  | 0.00034531 | 0.272328613 | 0.415257857 |
| cg19104757 | FAM20C     | 7  | 0.00071142 | 0.244980403 | 0.382181937 |
| cg08616667 | FAM20C     | 7  | 0.00286201 | 0.152473354 | 0.281868282 |
| cg20949644 | FAM20C     | 7  | 0.00256908 | 0.421300163 | 0.545404724 |
| cg00640479 | FAM20C     | 7  | 0.01610703 | 0.400407372 | 0.51689684  |
| cg12012581 | FAM20C     | 7  | 0.00190568 | 0.16139718  | 0.27322141  |
| cg09630706 | FAM20C     | 7  | 0.00188252 | 0.135444102 | 0.243708663 |
| cg19619414 | FAM20C     | 7  | 0.00235505 | 0.156971108 | 0.263032003 |
| cg15683166 | FAM24B     | 10 | 0.00167193 | 0.292847143 | 0.488522935 |
| cg16351002 | FAM24B     | 10 | 0.00064932 | 0.321223199 | 0.444753348 |
| cg03283421 | FAM24B     | 10 | 0.0254833  | 0.156207585 | 0.278551701 |
| cg24248680 | FAM24B     | 10 | 0.02041879 | 0.550504337 | 0.661018585 |
| cg27539806 | FAM38A     | 16 | 0.00077889 | 0.440188777 | 0.636798025 |
| cg06751612 | FAM38A     | 16 | 0.00144872 | 0.435916184 | 0.57799012  |
| cg26828643 | FAM38A     | 16 | 0.00308431 | 0.396335682 | 0.532600788 |
| cg09848947 | FAM38A     | 16 | 0.00294736 | 0.236217004 | 0.366604451 |
| cg16641055 | FAM38A     | 16 | 0.00044198 | 0.29540489  | 0.401231747 |
| cg27630153 | FAM38A     | 16 | 0.02825258 | 0.535803393 | 0.641188801 |

|            |              |    |            |             |             |
|------------|--------------|----|------------|-------------|-------------|
| cg06855137 | FAM38A       | 16 | 0.0013379  | 0.249104342 | 0.353878752 |
| cg15648792 | FAM38B       | 18 | 0.00223227 | 0.329216152 | 0.497250673 |
| cg27552711 | FAM46B       | 1  | 0.00011155 | 0.268717092 | 0.395093981 |
| cg00626702 | FAM53A       | 4  | 0.00325787 | 0.181961549 | 0.322106657 |
| cg19975346 | FAM53B       | 10 | 0.00023669 | 0.276780301 | 0.488140008 |
| cg26725552 | FAM53B       | 10 | 0.03333772 | 0.682098537 | 0.83264799  |
| cg24377826 | FAM53B       | 10 | 0.00643729 | 0.100272538 | 0.206291426 |
| cg22223402 | FAM55D;FAM   | 11 | 0.00544249 | 0.394307379 | 0.537367519 |
| cg01045946 | FAM63A;PRL   | 1  | 0.00566951 | 0.429761747 | 0.555401002 |
| cg01872947 | FAM65A       | 16 | 0.00675259 | 0.207957154 | 0.354408375 |
| cg11407681 | FAM78B       | 1  | 0.00091291 | 0.156068027 | 0.28318722  |
| cg22248750 | FAM82A1      | 2  | 0.01607913 | 0.155069939 | 0.356637592 |
| cg02606596 | FAM82A2      | 15 | 0.00283463 | 0.689524834 | 0.83568374  |
| cg21217092 | FAM82A2      | 15 | 0.00449277 | 0.69701115  | 0.800719211 |
| cg15217784 | FAM83B       | 6  | 0.04193261 | 0.281597326 | 0.384682011 |
| cg00846121 | FAM83E       | 19 | 0.00367951 | 0.207920593 | 0.359452974 |
| cg13791971 | FANCC        | 9  | 0.01590497 | 0.325493839 | 0.455061661 |
| cg12798052 | FANCE        | 6  | 0.04920939 | 0.726745874 | 0.838347209 |
| cg15168958 | FARP1        | 13 | 0.00067158 | 0.349236617 | 0.555267174 |
| cg20750642 | FARP1        | 13 | 0.00135329 | 0.157555257 | 0.341399135 |
| cg17380943 | FARP1        | 13 | 0.00464266 | 0.453162801 | 0.611593193 |
| cg02183491 | FARP1        | 13 | 0.00888148 | 0.127034098 | 0.243718412 |
| cg11829616 | FARP1        | 13 | 0.03542404 | 0.474183474 | 0.590555566 |
| cg16450249 | FARP1;FARP1  | 13 | 0.0091327  | 0.145630896 | 0.280573314 |
| cg19832331 | FARP1;FARP1  | 13 | 0.02637962 | 0.671243363 | 0.789990642 |
| cg06450397 | FAS;FAS;FAS; | 10 | 0.00312839 | 0.466306249 | 0.681937109 |
| cg27131953 | FASTK;TMUB   | 7  | 0.00140413 | 0.256389659 | 0.376898751 |
| cg10702041 | FASTK;TMUB   | 7  | 0.00498265 | 0.324601537 | 0.443995701 |
| cg08070200 | FAT1         | 4  | 0.04130279 | 0.338237747 | 0.510354364 |
| cg27661793 | FAT1         | 4  | 0.00652965 | 0.173246338 | 0.343972219 |
| cg01880399 | FAT1         | 4  | 0.03922042 | 0.350810631 | 0.509482229 |
| cg23334660 | FAT1         | 4  | 0.01148478 | 0.101731425 | 0.244145965 |
| cg20656964 | FAT1         | 4  | 0.01239525 | 0.55565266  | 0.671981476 |
| cg00290101 | FAT3         | 11 | 0.00229712 | 0.630472458 | 0.734722842 |
| cg18183817 | FBLN2;FBLN2  | 3  | 0.00142463 | 0.724833649 | 0.842924418 |
| cg00498816 | FBLN2;FBLN2  | 3  | 0.00599492 | 0.720704593 | 0.82908686  |
| cg04956944 | FBLN7;FBLN7  | 2  | 0.00016424 | 0.405649494 | 0.624692023 |
| cg14549078 | FBN1         | 15 | 0.02689494 | 0.14574032  | 0.294486881 |
| cg06068085 | FBN2         | 5  | 0.02304947 | 0.565210626 | 0.726300636 |
| cg04093645 | FBN2         | 5  | 0.03301683 | 0.242411356 | 0.360195013 |
| cg25750363 | FBRSL1       | 12 | 0.00364365 | 0.209638089 | 0.477176729 |
| cg24621258 | FBRSL1       | 12 | 0.01022347 | 0.182413412 | 0.400232777 |
| cg24462656 | FBRSL1       | 12 | 0.00459395 | 0.149731542 | 0.339920801 |
| cg20664313 | FBRSL1       | 12 | 0.00050073 | 0.404942358 | 0.557223916 |
| cg19510206 | FBRSL1       | 12 | 0.0031185  | 0.543439036 | 0.682980469 |
| cg00960772 | FBRSL1       | 12 | 0.00401725 | 0.334313323 | 0.463489764 |

|            |              |    |            |             |             |
|------------|--------------|----|------------|-------------|-------------|
| cg22044630 | FBRSL1       | 12 | 0.00038114 | 0.530183618 | 0.636207555 |
| cg03378525 | FBXL18       | 7  | 8.60E-05   | 0.483268382 | 0.607732792 |
| cg27041868 | FBXL18       | 7  | 0.02281776 | 0.581787285 | 0.700113558 |
| cg04653928 | FBXL19       | 16 | 0.00876901 | 0.551624194 | 0.660606067 |
| cg04220072 | FBXL19       | 16 | 0.00899022 | 0.615868988 | 0.718873842 |
| cg07599144 | FBXL19;ORAI  | 16 | 0.00854462 | 0.175763111 | 0.303477778 |
| cg01149929 | FBXL7        | 5  | 0.03996539 | 0.549216877 | 0.657920277 |
| cg02160692 | FBXO11;FBXC  | 2  | 0.00933768 | 0.723328688 | 0.829602449 |
| cg12219469 | FBXO18;FBXC  | 10 | 0.01752669 | 0.590079526 | 0.705613435 |
| cg24878594 | FBXO2        | 1  | 0.00378412 | 0.15953626  | 0.264078336 |
| cg19256813 | FBXO21;FBXC  | 12 | 0.00240163 | 0.136453163 | 0.292882087 |
| cg26470309 | FBXO21;FBXC  | 12 | 0.02397374 | 0.327449078 | 0.448502764 |
| cg02312706 | FBXO31;FBXC  | 16 | 0.00313139 | 0.289216415 | 0.472761659 |
| cg21918313 | FBXO41       | 2  | 0.00143987 | 0.226008526 | 0.366350013 |
| cg26829322 | FBXO44;FBXC  | 1  | 0.00074    | 0.324330302 | 0.507754782 |
| cg05796704 | FBXO44;FBXC  | 1  | 0.0003023  | 0.141811468 | 0.290766086 |
| cg04708391 | FBXO8        | 4  | 0.00435552 | 0.731486276 | 0.859411697 |
| cg10523001 | FBXW11;FBX   | 5  | 0.00551546 | 0.307139829 | 0.521935083 |
| cg23985408 | FBXW11;FBX   | 5  | 0.02117189 | 0.329590726 | 0.49586625  |
| cg08361180 | FBXW4        | 10 | 0.01376109 | 0.12821767  | 0.314169121 |
| cg27371456 | FBXW4        | 10 | 0.0184521  | 0.144502681 | 0.324754417 |
| cg07050611 | FBXW8;FBXV   | 12 | 0.00282974 | 0.444847113 | 0.616577762 |
| cg17860133 | FBXW8;FBXV   | 12 | 0.00129139 | 0.597759012 | 0.740619519 |
| cg22942846 | FCGR2B;FCGI  | 1  | 0.00037978 | 0.276057222 | 0.464456976 |
| cg17467108 | FCHSD2       | 11 | 0.00171446 | 0.521478291 | 0.670281844 |
| cg24496021 | FCHSD2       | 11 | 0.01266835 | 0.493923405 | 0.642267911 |
| cg26549860 | FCHSD2       | 11 | 0.02671736 | 0.372826057 | 0.519559465 |
| cg20577477 | FDFT1        | 8  | 0.00305422 | 0.508743141 | 0.673779579 |
| cg06979924 | FDPS;FDPS;FI | 1  | 0.01186504 | 0.217137009 | 0.339918638 |
| cg26827653 | FEZ1;FEZ1    | 11 | 0.00170365 | 0.242655542 | 0.365966012 |
| cg07541160 | FGD2         | 6  | 0.00306503 | 0.159355278 | 0.264676117 |
| cg09718347 | FGD5         | 3  | 0.01229374 | 0.484970045 | 0.632487571 |
| cg05173159 | FGD6         | 12 | 0.00479718 | 0.530976986 | 0.644588857 |
| cg20684197 | FGF1;FGF1;FI | 5  | 0.00795469 | 0.278125429 | 0.486682818 |
| cg19445684 | FGF1;FGF1;FI | 5  | 0.0022721  | 0.223968166 | 0.337359804 |
| cg21619138 | FGF1;FGF1;FI | 5  | 0.00871268 | 0.116934943 | 0.289532705 |
| cg02406096 | FGF1;FGF1;FI | 5  | 0.00896413 | 0.210319411 | 0.352092306 |
| cg12810152 | FGF1;FGF1;FI | 5  | 0.00293746 | 0.784048273 | 0.892835571 |
| cg20602244 | FGF14        | 13 | 0.02696541 | 0.715759676 | 0.817060598 |
| cg19576738 | FGF2         | 4  | 0.03111938 | 0.148017281 | 0.30203666  |
| cg14703482 | FGF2         | 4  | 0.0119636  | 0.12915281  | 0.282293399 |
| cg26955980 | FGF9         | 13 | 0.00985044 | 0.568020536 | 0.697536301 |
| cg17091967 | FGFBP1       | 4  | 0.00461401 | 0.344346578 | 0.49727119  |
| cg27653103 | FGFR1;FGFR1  | 8  | 0.01539186 | 0.132500361 | 0.318263318 |
| cg12226006 | FGFR2;FGFR2  | 10 | 0.00220544 | 0.280973435 | 0.540792306 |
| cg25294906 | FGFR2;FGFR2  | 10 | 0.00048831 | 0.382094965 | 0.588514003 |

|            |              |    |            |             |             |
|------------|--------------|----|------------|-------------|-------------|
| cg03552039 | FGFR2;FGFR2  | 10 | 0.00139778 | 0.308007298 | 0.481501492 |
| cg20277356 | FGFR2;FGFR2  | 10 | 0.02712434 | 0.292880524 | 0.465795458 |
| cg10280007 | FGFR2;FGFR2  | 10 | 0.033075   | 0.264795199 | 0.428379048 |
| cg14834653 | FGFR2;FGFR2  | 10 | 0.0175541  | 0.244431104 | 0.406696607 |
| cg13734061 | FGFR2;FGFR2  | 10 | 0.01744334 | 0.559973179 | 0.707380362 |
| cg13175830 | FGFR2;FGFR2  | 10 | 0.0228628  | 0.129624118 | 0.272851117 |
| cg17337672 | FGFR2;FGFR2  | 10 | 0.00918369 | 0.359029654 | 0.478604968 |
| cg10314760 | FGFR2;FGFR2  | 10 | 0.03407444 | 0.325825961 | 0.515942537 |
| cg10362842 | FGFR2;FGFR2  | 10 | 0.00751459 | 0.359731095 | 0.486019124 |
| cg00730832 | FGFR2;FGFR2  | 10 | 0.00645438 | 0.182878409 | 0.370822272 |
| cg17997363 | FGFR2;FGFR2  | 10 | 0.00400545 | 0.213990887 | 0.368048326 |
| cg10788901 | FGFR2;FGFR2  | 10 | 0.00838658 | 0.226190091 | 0.328113482 |
| cg21311834 | FGFR3;FGFR3  | 4  | 0.00170818 | 0.269728255 | 0.527719885 |
| cg08145949 | FGFR3;FGFR3  | 4  | 0.00014697 | 0.306266407 | 0.528245166 |
| cg15697036 | FGFR3;FGFR3  | 4  | 0.00033097 | 0.393091608 | 0.580804891 |
| cg03262295 | FGFR3;FGFR3  | 4  | 0.02341656 | 0.771355204 | 0.90210097  |
| cg02137691 | FGFR3;FGFR3  | 4  | 0.00785242 | 0.392883558 | 0.5146998   |
| cg18229134 | FGFR4;FGFR4  | 5  | 0.00507162 | 0.458969216 | 0.623341703 |
| cg04849878 | FGFR4;FGFR4  | 5  | 0.00609971 | 0.397406344 | 0.520905657 |
| cg14869372 | FGFRL1;FGFR  | 4  | 0.0010134  | 0.42038985  | 0.64583812  |
| cg02826685 | FGFRL1;FGFR  | 4  | 0.00012656 | 0.58376127  | 0.772100768 |
| cg18699025 | FGFRL1;FGFR  | 4  | 0.00152272 | 0.198473842 | 0.34704631  |
| cg14724492 | FGFRL1;FGFR  | 4  | 0.0010018  | 0.456325216 | 0.603814869 |
| cg08521859 | FGFRL1;FGFR  | 4  | 0.0034389  | 0.184296979 | 0.329181414 |
| cg11411884 | FGFRL1;FGFR  | 4  | 0.01136949 | 0.576977068 | 0.718363883 |
| cg07727358 | FGFRL1;FGFR  | 4  | 0.00123238 | 0.428435433 | 0.550812587 |
| cg02014217 | FGFRL1;FGFR  | 4  | 0.00149795 | 0.494585359 | 0.616024158 |
| cg00160522 | FGFRL1;FGFR  | 4  | 0.0001963  | 0.500654881 | 0.618595623 |
| cg03414932 | FGFRL1;FGFR  | 4  | 0.00542799 | 0.182551502 | 0.299313539 |
| cg06839424 | FGFRL1;FGFR  | 4  | 0.00015759 | 0.415293109 | 0.530312446 |
| cg04145890 | FGFRL1;FGFR  | 4  | 0.00279548 | 0.182948591 | 0.295838815 |
| cg16398581 | FGGY;FGGY    | 1  | 0.02423124 | 0.240928519 | 0.373152321 |
| cg15594444 | FGGY;FGGY    | 1  | 0.04418248 | 0.528872695 | 0.641035607 |
| cg23167456 | FGR;FGR;FGF  | 1  | 0.00081566 | 0.652407383 | 0.76977066  |
| cg13184177 | FGR;FGR;FGF  | 1  | 0.00378545 | 0.519625254 | 0.635577817 |
| cg01783051 | FH           | 1  | 0.00074104 | 0.521267215 | 0.656800153 |
| cg14160480 | FHAD1        | 1  | 0.03886736 | 0.11390285  | 0.261614795 |
| cg11815980 | FHIT;FHIT    | 3  | 0.0222326  | 0.493969733 | 0.632948603 |
| cg16503279 | FHOD1        | 16 | 0.02507998 | 0.2493092   | 0.368676675 |
| cg18262801 | FHOD1        | 16 | 0.04488849 | 0.360269985 | 0.478592538 |
| cg03050473 | FIGNL1;FIGN  | 7  | 0.00730765 | 0.759585147 | 0.897540521 |
| cg02741811 | FIGNL1;FIGN  | 7  | 0.01652217 | 0.78145449  | 0.885464301 |
| cg19977232 | FIP1L1;FIP1L | 4  | 0.00158086 | 0.677801588 | 0.798418918 |
| cg06429887 | FITM1        | 14 | 0.01411881 | 0.183925613 | 0.288161919 |
| cg19226017 | FKBP5;LOC28  | 6  | 0.02474186 | 0.309399245 | 0.495532664 |
| cg07702311 | FLI1;FLI1    | 11 | 0.01009134 | 0.468196164 | 0.627077371 |

|            |              |    |            |             |             |
|------------|--------------|----|------------|-------------|-------------|
| cg27390009 | FLII         | 17 | 0.00059056 | 0.312134303 | 0.435609193 |
| cg09922349 | FLII         | 17 | 0.00018505 | 0.683385679 | 0.79496154  |
| cg01048349 | FLJ10357     | 14 | 0.00434474 | 0.326054958 | 0.46083023  |
| cg26926497 | FLJ22536     | 6  | 0.01345018 | 0.150539524 | 0.321361091 |
| cg22800743 | FLJ22536     | 6  | 0.03083056 | 0.188918924 | 0.346914531 |
| cg15541384 | FLJ22536     | 6  | 0.03583406 | 0.219596194 | 0.326459088 |
| cg08373323 | FLJ32810     | 11 | 0.00300318 | 0.249165861 | 0.47654772  |
| cg14192935 | FLJ35024     | 9  | 0.00446716 | 0.146545762 | 0.267173169 |
| cg14761417 | FLJ43663;FLJ | 7  | 0.00145834 | 0.366214872 | 0.57735033  |
| cg11850276 | FLJ44606;FLJ | 5  | 0.02342458 | 0.612369729 | 0.722745704 |
| cg03243768 | FLJ46111     | 11 | 0.00815301 | 0.767366118 | 0.903316861 |
| cg05116002 | FLNB;FLNB;FL | 3  | 0.01113153 | 0.231450833 | 0.377611587 |
| cg01869548 | FLYWCH2;FL   | 16 | 0.00316342 | 0.455710576 | 0.60385133  |
| cg17802486 | FMN1         | 15 | 0.00870659 | 0.116434435 | 0.331976654 |
| cg13068215 | FMN2         | 1  | 0.04255478 | 0.175676423 | 0.309404372 |
| cg21617353 | FMNL1        | 17 | 0.00219969 | 0.30454503  | 0.498002356 |
| cg20408776 | FMNL1        | 17 | 0.00264642 | 0.256520131 | 0.44482922  |
| cg19735250 | FMNL1        | 17 | 0.00133518 | 0.25948419  | 0.444025692 |
| cg15194531 | FMNL1        | 17 | 0.00139817 | 0.341818842 | 0.46504644  |
| cg06343233 | FMNL2        | 2  | 0.00038103 | 0.31340195  | 0.554435014 |
| cg15705810 | FMNL2        | 2  | 0.01161015 | 0.183132548 | 0.384596952 |
| cg26207245 | FMNL2        | 2  | 0.02692038 | 0.476323142 | 0.660925113 |
| cg21860045 | FMNL2        | 2  | 0.00308431 | 0.566767839 | 0.750396671 |
| cg11173609 | FMNL2        | 2  | 0.03886472 | 0.380909189 | 0.543219889 |
| cg16034517 | FMO1         | 1  | 0.03789589 | 0.123258103 | 0.298067261 |
| cg13081014 | FMO1         | 1  | 0.03719363 | 0.320003166 | 0.420483709 |
| cg12495731 | FN3K         | 17 | 4.66E-05   | 0.456827496 | 0.714548042 |
| cg12202228 | FNDC3B;FND   | 3  | 0.01534992 | 0.346936605 | 0.533125576 |
| cg00000109 | FNDC3B;FND   | 3  | 0.01135229 | 0.299180043 | 0.483752372 |
| cg26334671 | FNDC3B;FND   | 3  | 0.01828038 | 0.336051458 | 0.514778771 |
| cg08495617 | FNDC3B;FND   | 3  | 0.0292433  | 0.434896863 | 0.586271732 |
| cg00360324 | FNDC4        | 2  | 0.00164057 | 0.689245467 | 0.80991345  |
| cg03976754 | FNDC5        | 1  | 0.006918   | 0.41449763  | 0.514863264 |
| cg07630327 | FNIP1;FNIP1  | 5  | 0.01566012 | 0.167813605 | 0.284901739 |
| cg15418509 | FOLR1;FOLR1  | 11 | 0.01524012 | 0.477406755 | 0.586086491 |
| cg16155858 | FOSL2        | 2  | 0.00538325 | 0.311672757 | 0.417250136 |
| cg11244091 | FOXA3        | 19 | 0.01554364 | 0.3930299   | 0.514364804 |
| cg12284789 | FOXJ1        | 17 | 0.00022303 | 0.354179782 | 0.458860204 |
| cg11931953 | FOXK1        | 7  | 0.00151459 | 0.627771469 | 0.819652958 |
| cg06114605 | FOXK1        | 7  | 0.01544883 | 0.458735062 | 0.63222226  |
| cg05237718 | FOXK1        | 7  | 0.00026569 | 0.42461669  | 0.576888893 |
| cg22581896 | FOXK1        | 7  | 0.0265214  | 0.483907352 | 0.630750922 |
| cg23318967 | FOXK1        | 7  | 0.00577668 | 0.386180812 | 0.527109226 |
| cg05066096 | FOXK1        | 7  | 0.0210383  | 0.479738262 | 0.614103156 |
| cg27496570 | FOXK1        | 7  | 0.00353101 | 0.534122303 | 0.640675603 |
| cg06114987 | FOXL1        | 16 | 0.00173908 | 0.591772997 | 0.765296418 |

|            |             |    |            |             |             |
|------------|-------------|----|------------|-------------|-------------|
| cg20921751 | FOXN2       | 2  | 0.00465497 | 0.552828228 | 0.740012741 |
| cg14113778 | FOXN3       | 14 | 0.00041989 | 0.728335924 | 0.856722222 |
| cg24714561 | FOXN3       | 14 | 0.01985488 | 0.578245465 | 0.683033653 |
| cg18359596 | FOXN3;FOXN  | 14 | 0.01232798 | 0.602704023 | 0.743601993 |
| cg01838853 | FOXN4       | 12 | 0.00016369 | 0.225421441 | 0.380701856 |
| cg19484481 | FOXO3;FOXC  | 6  | 0.00063227 | 0.371317495 | 0.631075484 |
| cg15472885 | FOXP1       | 3  | 0.02898967 | 0.233632324 | 0.384326862 |
| cg00201568 | FOXP1       | 3  | 0.02075616 | 0.527483452 | 0.658672793 |
| cg15963983 | FOXP1       | 3  | 0.04552246 | 0.505613137 | 0.633631688 |
| cg21487363 | FOXP1;FOXP  | 3  | 0.0055701  | 0.695103886 | 0.796856965 |
| cg20050108 | FOXP2;FOXP  | 7  | 0.00805535 | 0.585687947 | 0.720795581 |
| cg18871253 | FOXP2;FOXP  | 7  | 0.02853933 | 0.205025788 | 0.360309763 |
| cg07588430 | FOXP4;FOXP  | 6  | 0.00066183 | 0.537561494 | 0.697547561 |
| cg23867085 | FOXP4;FOXP  | 6  | 0.01873649 | 0.220541506 | 0.373842478 |
| cg03127034 | FOXP4;FOXP  | 6  | 0.00023669 | 0.561753522 | 0.696175715 |
| cg11177740 | FOXP4;FOXP  | 6  | 0.00109287 | 0.216828817 | 0.347837734 |
| cg03510041 | FOXP4;FOXP  | 6  | 0.02079217 | 0.245872309 | 0.37173116  |
| cg14615192 | FOXP4;FOXP  | 6  | 0.02077687 | 0.36951004  | 0.494005782 |
| cg10719970 | FOXP4;FOXP  | 6  | 0.00920837 | 0.40202541  | 0.510487644 |
| cg17631429 | FOXS1       | 20 | 0.00185834 | 0.570793636 | 0.788124181 |
| cg15237820 | FRAS1;FRAS1 | 4  | 0.00104901 | 0.423285511 | 0.644432968 |
| cg21713614 | FRAS1;FRAS1 | 4  | 0.00221375 | 0.218211224 | 0.32600199  |
| cg21243750 | FREM1       | 9  | 0.00459939 | 0.44647767  | 0.569663714 |
| cg13426351 | FREQ        | 9  | 0.01244501 | 0.429603902 | 0.581270609 |
| cg07509364 | FRG1B       | 20 | 0.01982578 | 0.629653222 | 0.76995803  |
| cg06127202 | FRK         | 6  | 0.00894899 | 0.229186263 | 0.380901294 |
| cg00430287 | FRK         | 6  | 0.01534992 | 0.109635663 | 0.221565459 |
| cg11813497 | FRMD4A      | 10 | 0.00279035 | 0.248733468 | 0.422415175 |
| cg26334209 | FRMD4A      | 10 | 0.0019705  | 0.475504383 | 0.629303408 |
| cg25344406 | FRMD4A      | 10 | 0.03347989 | 0.090677794 | 0.204941753 |
| cg24008634 | FRMD4A      | 10 | 0.031656   | 0.492624889 | 0.605909283 |
| cg09505746 | FRMD4A      | 10 | 0.04258807 | 0.323375845 | 0.428781679 |
| cg00468670 | FRMD4B      | 3  | 0.02130183 | 0.085018466 | 0.197563776 |
| cg05104995 | FRMPD2;FRM  | 10 | 0.00067935 | 0.499538015 | 0.63040886  |
| cg18937934 | FRY         | 13 | 0.04731212 | 0.5997625   | 0.704339774 |
| cg10374564 | FRYL        | 4  | 0.02492888 | 0.400309257 | 0.54020897  |
| cg01735082 | FRZB        | 2  | 0.00302187 | 0.290507102 | 0.402489305 |
| cg13087761 | FSCN1       | 7  | 0.00040167 | 0.1722949   | 0.423289606 |
| cg09188385 | FSCN1       | 7  | 0.00069592 | 0.188713166 | 0.385625796 |
| cg06969129 | FSCN1       | 7  | 0.00983727 | 0.288373447 | 0.425819892 |
| cg04952186 | FSCN1       | 7  | 0.00829469 | 0.170062085 | 0.27201235  |
| cg01512532 | FSCN2;FSCN  | 17 | 0.00384939 | 0.235506802 | 0.401032581 |
| cg18919720 | FSCN2;FSCN  | 17 | 0.00036501 | 0.176493864 | 0.305038397 |
| cg13694281 | FSCN2;FSCN  | 17 | 0.04573699 | 0.62882693  | 0.734511549 |
| cg23164850 | FSCN2;FSCN  | 17 | 0.0013563  | 0.305331405 | 0.407630792 |
| cg25902889 | FSD1        | 19 | 0.0083029  | 0.132646215 | 0.249350161 |

|            |             |    |            |             |             |
|------------|-------------|----|------------|-------------|-------------|
| cg26166170 | FSIP1       | 15 | 0.01116047 | 0.565794798 | 0.677759264 |
| cg07352158 | FSTL1       | 3  | 0.04959838 | 0.652017801 | 0.754736013 |
| cg27377632 | FSTL3       | 19 | 0.01396978 | 0.220703887 | 0.327427983 |
| cg25322094 | FSTL4       | 5  | 0.02454111 | 0.549767247 | 0.698135743 |
| cg12075901 | FURIN       | 15 | 0.00019723 | 0.696969884 | 0.84934396  |
| cg14231966 | FURIN       | 15 | 0.00429162 | 0.345255757 | 0.463208417 |
| cg08873673 | FUT2;FUT2   | 19 | 0.00723982 | 0.294429235 | 0.405167359 |
| cg24256772 | FUT4        | 11 | 0.00394102 | 0.53555293  | 0.67090674  |
| cg08863777 | FUT4        | 11 | 0.00028216 | 0.216457817 | 0.332944341 |
| cg18554976 | FXYD1;FXYD1 | 19 | 0.00286981 | 0.309119336 | 0.480905275 |
| cg22335223 | FXYD2       | 11 | 0.00331135 | 0.353764108 | 0.470978435 |
| cg07170302 | FXYD2;FXYD2 | 11 | 0.01892162 | 0.164722639 | 0.270964367 |
| cg00480115 | FXYD3;FXYD3 | 19 | 0.00102552 | 0.219462387 | 0.435290586 |
| cg21304163 | FXYD3;FXYD3 | 19 | 0.00139353 | 0.654899873 | 0.760891711 |
| cg02633817 | FXYD3;FXYD3 | 19 | 0.00411559 | 0.127485359 | 0.244828693 |
| cg12055183 | FXYD5;FXYD5 | 19 | 0.02737122 | 0.643958995 | 0.748110819 |
| cg14848289 | FXYD6;FXYD6 | 11 | 0.00671632 | 0.2519568   | 0.427648963 |
| cg00161459 | FZD6;FZD6;F | 8  | 0.01587606 | 0.555871275 | 0.709852838 |
| cg02906915 | FZD8;FZD8   | 10 | 0.04390582 | 0.126727076 | 0.289316742 |
| cg03009240 | FZR1        | 19 | 0.00045865 | 0.179618798 | 0.363642824 |
| cg25742761 | GAB1;GAB1   | 4  | 0.01800327 | 0.541142331 | 0.687811735 |
| cg14142817 | GAB1;GAB1   | 4  | 0.00108523 | 0.667437258 | 0.806289543 |
| cg06704469 | GABRR1      | 6  | 0.035748   | 0.44415464  | 0.574083663 |
| cg18105179 | GAL3ST2     | 2  | 0.0034206  | 0.684594527 | 0.800130563 |
| cg21523719 | GALE;GALE   | 1  | 0.00260955 | 0.326672404 | 0.477662296 |
| cg10961323 | GALE;GALE   | 1  | 0.00713579 | 0.223234889 | 0.348028512 |
| cg13780614 | GALK2;GALK2 | 15 | 0.03034423 | 0.565620387 | 0.674747028 |
| cg08466889 | GALNS       | 16 | 0.00118043 | 0.453673582 | 0.624665573 |
| cg09308897 | GALNS       | 16 | 0.00037711 | 0.360181455 | 0.525316042 |
| cg08894593 | GALNS       | 16 | 0.04244635 | 0.140784654 | 0.283902338 |
| cg06062279 | GALNS       | 16 | 0.00121732 | 0.534451012 | 0.63764811  |
| cg00563858 | GALNT10     | 5  | 0.00015494 | 0.323931855 | 0.562488485 |
| cg14968553 | GALNT10     | 5  | 0.00141404 | 0.493189019 | 0.667804781 |
| cg15817769 | GALNT2      | 1  | 0.01805573 | 0.253610775 | 0.447263055 |
| cg26525772 | GALNT2      | 1  | 0.03115886 | 0.349564344 | 0.530243442 |
| cg16698674 | GALNT2      | 1  | 0.01665941 | 0.327183546 | 0.498594216 |
| cg17954142 | GALNT2      | 1  | 0.00420732 | 0.375608309 | 0.512300458 |
| cg12526197 | GALNT2      | 1  | 0.00044351 | 0.235288265 | 0.352310015 |
| cg00245075 | GALNT6      | 12 | 0.00173908 | 0.154122689 | 0.278721641 |
| cg05410536 | GALNTL1;GA  | 14 | 0.00672071 | 0.095714966 | 0.201434232 |
| cg15438014 | GALNTL2     | 3  | 0.02192945 | 0.609254637 | 0.734193053 |
| cg05527856 | GALNTL4     | 11 | 0.0017168  | 0.213945472 | 0.409644826 |
| cg15094908 | GALNTL4     | 11 | 0.00688115 | 0.156473956 | 0.340628817 |
| cg23678274 | GALNTL4     | 11 | 0.04830176 | 0.10787338  | 0.241702642 |
| cg03299336 | GALNTL4     | 11 | 0.00777701 | 0.539439037 | 0.65200198  |
| cg25451660 | GALNTL4     | 11 | 0.01585199 | 0.108095181 | 0.2159614   |



|            |              |    |            |             |             |
|------------|--------------|----|------------|-------------|-------------|
| cg17679980 | GAS2;GAS2;C  | 11 | 0.00650129 | 0.683579401 | 0.818435982 |
| cg08102611 | GAS7         | 17 | 0.04160664 | 0.331379302 | 0.488210371 |
| cg21089050 | GAS7         | 17 | 9.12E-05   | 0.670458694 | 0.818073985 |
| cg10296867 | GAS7         | 17 | 0.00078095 | 0.694283954 | 0.818923896 |
| cg10237765 | GAS7;GAS7;C  | 17 | 0.03027531 | 0.411876697 | 0.530846527 |
| cg10089865 | GATA3;GATA   | 10 | 0.00377937 | 0.538146605 | 0.751153536 |
| cg25209111 | GBF1         | 10 | 0.03135851 | 0.287063171 | 0.408017842 |
| cg12105183 | GBP6         | 1  | 0.00057103 | 0.419398755 | 0.596559095 |
| cg01779116 | GCA          | 2  | 0.0028186  | 0.768166818 | 0.896814992 |
| cg11817650 | GCH1;GCH1;C  | 14 | 0.04816921 | 0.294154444 | 0.453794174 |
| cg26992186 | GCK          | 7  | 0.00791268 | 0.139597258 | 0.250375265 |
| cg02868790 | GCLC         | 6  | 0.00462227 | 0.343497551 | 0.569433259 |
| cg17240133 | GCOM1;GCO    | 15 | 0.01343519 | 0.451348524 | 0.553901184 |
| cg02704931 | GCOM1;GRIN   | 15 | 0.02119285 | 0.473389907 | 0.58261825  |
| cg20546778 | GDAP1;GDAF   | 8  | 0.03189023 | 0.248051971 | 0.393753119 |
| cg12433084 | GDF10        | 10 | 0.00344835 | 0.186944962 | 0.326369242 |
| cg13565300 | GDF10        | 10 | 0.00790829 | 0.181827512 | 0.302910211 |
| cg19239052 | GDF10        | 10 | 0.00027715 | 0.236778585 | 0.345018172 |
| cg08062713 | GDF5         | 20 | 0.00125005 | 0.615264932 | 0.83143728  |
| cg17417496 | GDF5         | 20 | 5.69E-05   | 0.660940677 | 0.788199223 |
| cg10431651 | GDF5         | 20 | 0.00126315 | 0.256509458 | 0.380328143 |
| cg20226253 | GDF5         | 20 | 0.00590399 | 0.25513853  | 0.378323662 |
| cg05567631 | GDPD5        | 11 | 0.0010513  | 0.403536309 | 0.545515955 |
| cg11211563 | GEFT;GEFT    | 12 | 0.00697742 | 0.328313229 | 0.452597643 |
| cg22610645 | GEFT;GEFT    | 12 | 0.00105011 | 0.258742683 | 0.379361776 |
| cg15409097 | GEFT;GEFT    | 12 | 0.01341478 | 0.161969601 | 0.276095231 |
| cg22885024 | GEM;GEM      | 8  | 0.01220547 | 0.130586158 | 0.239959892 |
| cg18383668 | GEMIN7;GEM   | 19 | 0.00033097 | 0.218045788 | 0.369757708 |
| cg03383006 | GFAP;GFAP    | 17 | 5.22E-05   | 0.37647544  | 0.53766066  |
| cg01769243 | GFAP;GFAP    | 17 | 0.000313   | 0.307925703 | 0.445719066 |
| cg09639715 | GFAP;GFAP    | 17 | 0.00305099 | 0.198893438 | 0.323970347 |
| cg18316974 | GFI1;GFI1;GF | 1  | 0.0008256  | 0.196020058 | 0.327446027 |
| cg18146737 | GFI1;GFI1;GF | 1  | 0.00052979 | 0.214645745 | 0.339436973 |
| cg00318322 | GFOD2;GFOL   | 16 | 0.00684943 | 0.535672815 | 0.666503647 |
| cg06845268 | GFPT1        | 2  | 0.02245484 | 0.53610737  | 0.680376454 |
| cg07591442 | GFPT1        | 2  | 0.0262525  | 0.594383259 | 0.703537419 |
| cg26338723 | GFRA1;GFRA   | 10 | 0.00023272 | 0.417410924 | 0.57011647  |
| cg20626616 | GHRL;GHRL;C  | 3  | 0.01954521 | 0.435619131 | 0.611241932 |
| cg08489410 | GHRL;GHRL;C  | 3  | 0.00114323 | 0.43239094  | 0.668745681 |
| cg11030744 | GHRL;GHRL;C  | 3  | 0.00286657 | 0.453400099 | 0.681066772 |
| cg07871024 | GHRL;GHRL;C  | 3  | 0.00425472 | 0.636279044 | 0.755941159 |
| cg26970800 | GIF          | 11 | 0.00688952 | 0.480563725 | 0.590972195 |
| cg01563502 | GIGYF1       | 7  | 0.00097801 | 0.621952019 | 0.776691904 |
| cg12145783 | GIGYF1       | 7  | 0.00444573 | 0.400897067 | 0.506440089 |
| cg14528319 | GIPC1;GIPC1  | 19 | 0.00049889 | 0.168439077 | 0.300455719 |
| cg13320842 | GIPR         | 19 | 0.00732884 | 0.154331697 | 0.357232993 |

|            |              |    |            |             |             |
|------------|--------------|----|------------|-------------|-------------|
| cg17337670 | GIT2;GIT2;GI | 12 | 0.02321328 | 0.556375602 | 0.664906647 |
| cg03650119 | GJC2         | 1  | 0.00199572 | 0.306532585 | 0.451075442 |
| cg09257635 | GJC2         | 1  | 0.00156854 | 0.189421819 | 0.325380395 |
| cg10950111 | GJC2         | 1  | 0.01086228 | 0.299016964 | 0.410797611 |
| cg22844623 | GJC2;GUK1;C  | 1  | 0.00132552 | 0.373809066 | 0.493462833 |
| cg05930207 | GJD3;GJD3    | 17 | 0.03618258 | 0.479294598 | 0.604086938 |
| cg15868183 | GLB1L2       | 11 | 0.00205706 | 0.200361938 | 0.314452209 |
| cg07501052 | GLB1L2       | 11 | 0.01459084 | 0.53516298  | 0.6434863   |
| cg02774705 | GLI2         | 2  | 1.50E-05   | 0.39734608  | 0.685464504 |
| cg01791238 | GLI2         | 2  | 0.00401309 | 0.236144359 | 0.427743631 |
| cg14773228 | GLI2         | 2  | 0.01025613 | 0.618907568 | 0.778596017 |
| cg11791452 | GLI2         | 2  | 0.00318189 | 0.185346176 | 0.333345442 |
| cg21133992 | GLI2         | 2  | 0.00281769 | 0.228636271 | 0.369436093 |
| cg18843856 | GLI2         | 2  | 0.00200411 | 0.1867518   | 0.31616207  |
| cg05403744 | GLI2         | 2  | 0.02845482 | 0.576570635 | 0.69838871  |
| cg10310616 | GLI2         | 2  | 0.01316248 | 0.407104986 | 0.522179399 |
| cg15078211 | GLI3         | 7  | 0.00709266 | 0.279705642 | 0.498628744 |
| cg10120778 | GLI3         | 7  | 0.00412884 | 0.37747637  | 0.595303976 |
| cg00842259 | GLI3         | 7  | 0.00260757 | 0.407377295 | 0.586112225 |
| cg09008589 | GLI3         | 7  | 0.01745316 | 0.145394605 | 0.32131787  |
| cg01094108 | GLI3         | 7  | 0.0376999  | 0.605319551 | 0.757006598 |
| cg24079811 | GLI3         | 7  | 0.00360208 | 0.3063092   | 0.409316595 |
| cg21466107 | GLI3         | 7  | 0.00117879 | 0.548968594 | 0.651199131 |
| cg14825413 | GLI4         | 8  | 0.0025767  | 0.192280382 | 0.362643313 |
| cg22857963 | GLI4         | 8  | 0.00133255 | 0.132913821 | 0.302211048 |
| cg24510518 | GLI4         | 8  | 0.00325225 | 0.223530888 | 0.339426692 |
| cg27311970 | GLIS1        | 1  | 0.01098767 | 0.226280507 | 0.409363881 |
| cg05040219 | GLIS1        | 1  | 0.01107158 | 0.234817753 | 0.351203375 |
| cg05052407 | GLIS2        | 16 | 6.07E-05   | 0.298815875 | 0.490461972 |
| cg04694492 | GLIS2        | 16 | 0.00050349 | 0.277963192 | 0.466204097 |
| cg08602528 | GLIS2        | 16 | 0.00148332 | 0.352168142 | 0.469225314 |
| cg14590902 | GLT1D1       | 12 | 0.01560033 | 0.565113201 | 0.697359305 |
| cg26736878 | GLT25D1      | 19 | 0.00328298 | 0.36010716  | 0.524389018 |
| cg25605307 | GLT25D2      | 1  | 0.03770783 | 0.345191468 | 0.49641274  |
| cg03704673 | GLTPD2;GLTF  | 17 | 0.00038663 | 0.32304781  | 0.495922644 |
| cg16762849 | GMDS         | 6  | 0.00059935 | 0.266354425 | 0.519477821 |
| cg01465824 | GMDS         | 6  | 0.02275534 | 0.160488777 | 0.332322945 |
| cg07515565 | GMDS         | 6  | 0.00212384 | 0.229950093 | 0.394057514 |
| cg13394216 | GMDS         | 6  | 0.00888148 | 0.275942429 | 0.436080952 |
| cg11786839 | GMDS         | 6  | 0.00083715 | 0.475940857 | 0.620612802 |
| cg23120243 | GMDS         | 6  | 0.03232316 | 0.176731885 | 0.307904811 |
| cg10707788 | GMDS         | 6  | 0.01440455 | 0.377612504 | 0.506514464 |
| cg25936567 | GMDS         | 6  | 0.00073873 | 0.695145691 | 0.811255118 |
| cg17697739 | GMDS         | 6  | 0.04324504 | 0.197776428 | 0.30698595  |
| cg19962434 | GMEB2        | 20 | 0.01663966 | 0.758685085 | 0.860034446 |
| cg07899459 | GMIP         | 19 | 0.00365119 | 0.245172448 | 0.43284697  |

|            |             |    |            |             |             |
|------------|-------------|----|------------|-------------|-------------|
| cg08840441 | GMIP        | 19 | 0.00155457 | 0.333191823 | 0.508147915 |
| cg24366168 | GNA11       | 19 | 0.00013939 | 0.318625846 | 0.476869839 |
| cg06173857 | GNA12       | 7  | 0.00127256 | 0.696783084 | 0.860520678 |
| cg01839603 | GNA12       | 7  | 0.01606867 | 0.387510121 | 0.549911347 |
| cg05308829 | GNA12       | 7  | 0.01778689 | 0.638735648 | 0.783822829 |
| cg02046881 | GNA12       | 7  | 0.01569155 | 0.653059008 | 0.780483161 |
| cg19524238 | GNA12       | 7  | 0.01199142 | 0.211549861 | 0.321694724 |
| cg21028562 | GNAI2;GNAI2 | 3  | 0.0038042  | 0.296246405 | 0.423331819 |
| cg08644463 | GNAI3       | 1  | 0.01101316 | 0.395561448 | 0.542434185 |
| cg04037585 | GNAO1;GNAO1 | 16 | 0.01542163 | 0.42981745  | 0.553910744 |
| cg07786301 | GNAO1;GNAO1 | 16 | 0.04722469 | 0.519765567 | 0.61987366  |
| cg04019914 | GNAS;GNAS;  | 20 | 0.00157943 | 0.300474997 | 0.454431918 |
| cg17658854 | GNAS;GNAS;  | 20 | 0.00875333 | 0.469587542 | 0.601268674 |
| cg20782596 | GNAS;GNAS;  | 20 | 0.01587881 | 0.191305584 | 0.315033887 |
| cg21971807 | GNAS;GNAS;  | 20 | 0.02834175 | 0.339455771 | 0.475940929 |
| cg11021321 | GNAS;GNAS;  | 20 | 0.02273747 | 0.25544883  | 0.380934926 |
| cg13680388 | GNAS;GNAS;  | 20 | 0.04552577 | 0.363831506 | 0.475492194 |
| cg24714094 | GNAZ;RTDR1  | 22 | 0.00197671 | 0.297408075 | 0.458658889 |
| cg15921518 | GNB2L1      | 5  | 0.0002805  | 0.575879567 | 0.691465162 |
| cg16433737 | GNB3        | 12 | 0.00295595 | 0.292966371 | 0.492483277 |
| cg00808175 | GNB3        | 12 | 0.00057103 | 0.621252919 | 0.745558826 |
| cg11871050 | GNB5        | 15 | 0.00422232 | 0.21125058  | 0.328611199 |
| cg00884805 | GNG12       | 1  | 0.01821182 | 0.28489499  | 0.423845133 |
| cg22522961 | GNG12       | 1  | 0.03999208 | 0.575358612 | 0.694750445 |
| cg14011070 | GNG4;GNG4;  | 1  | 0.04734949 | 0.282543635 | 0.406584673 |
| cg08407014 | GNG7        | 19 | 0.01113474 | 0.185494972 | 0.329637284 |
| cg12281620 | GNG7        | 19 | 0.00038862 | 0.215585818 | 0.340696058 |
| cg27176392 | GNG7        | 19 | 0.00644719 | 0.660056829 | 0.782915022 |
| cg24788034 | GNG7        | 19 | 0.00271881 | 0.161539917 | 0.27424209  |
| cg04178634 | GNG7        | 19 | 0.03873108 | 0.16630622  | 0.27218649  |
| cg05616995 | GNPDA1      | 5  | 0.01938417 | 0.286918659 | 0.395486749 |
| cg13478617 | GNPTG       | 16 | 0.00358111 | 0.514989259 | 0.642027376 |
| cg04267184 | GNRH2;GNRI  | 20 | 0.0087458  | 0.128680168 | 0.282006433 |
| cg08436467 | GNRH2;GNRI  | 20 | 0.01719143 | 0.493527062 | 0.616116208 |
| cg16120883 | GOLGA3      | 12 | 0.00198459 | 0.466400902 | 0.692442557 |
| cg23149010 | GOLGA3      | 12 | 0.0036429  | 0.667224089 | 0.850311513 |
| cg16078863 | GOLGA3      | 12 | 0.01156087 | 0.149367877 | 0.310582796 |
| cg05614952 | GOLGA3      | 12 | 0.00121952 | 0.591312967 | 0.728588955 |
| cg08424446 | GOLGA3      | 12 | 0.000313   | 0.657560963 | 0.787877967 |
| cg18189641 | GOLGA3      | 12 | 0.03800603 | 0.18782121  | 0.29823274  |
| cg20765580 | GOLGA3      | 12 | 0.01186455 | 0.586572441 | 0.69188896  |
| cg17346500 | GOLIM4      | 3  | 0.00139857 | 0.378645495 | 0.617068437 |
| cg14574047 | GOLM1;GOLI  | 9  | 0.03280249 | 0.529815058 | 0.647457635 |
| cg13850654 | GOLM1;GOLI  | 9  | 0.01131348 | 0.581096188 | 0.683410088 |
| cg15928742 | GORASP2     | 2  | 0.01073052 | 0.331527595 | 0.469788463 |
| cg00782690 | GORASP2     | 2  | 0.00928796 | 0.380286497 | 0.5066212   |

|            |             |    |            |             |             |
|------------|-------------|----|------------|-------------|-------------|
| cg06752392 | GPATCH1     | 19 | 0.02030471 | 0.362005789 | 0.553410967 |
| cg15011026 | GPATCH2     | 1  | 0.04887758 | 0.151411412 | 0.326342649 |
| cg05087722 | GPC1        | 2  | 1.50E-05   | 0.555873656 | 0.707836282 |
| cg20094506 | GPC1        | 2  | 7.12E-05   | 0.469604312 | 0.590207515 |
| cg17676994 | GPC1        | 2  | 0.00192692 | 0.424770764 | 0.537300174 |
| cg11772527 | GPC6        | 13 | 0.0019705  | 0.279822472 | 0.547565577 |
| cg06047020 | GPC6        | 13 | 0.00452251 | 0.272853854 | 0.448903336 |
| cg26671050 | GPC6        | 13 | 0.00318772 | 0.564339679 | 0.717732608 |
| cg01537769 | GPC6        | 13 | 0.00191641 | 0.676620448 | 0.798704106 |
| cg25679431 | GPD1L       | 3  | 0.00021379 | 0.422288    | 0.698517377 |
| cg15318697 | GPD1L       | 3  | 1.49E-05   | 0.279486433 | 0.533291313 |
| cg20585500 | GPHA2       | 11 | 0.00532175 | 0.590921698 | 0.706320961 |
| cg07537750 | GPHA2       | 11 | 0.00409524 | 0.467521156 | 0.580068919 |
| cg13393408 | GPR107;GPR  | 9  | 0.00243608 | 0.463749475 | 0.659183256 |
| cg23649631 | GPR123      | 10 | 0.02645434 | 0.362095818 | 0.480954687 |
| cg12869334 | GPR124      | 8  | 0.00042068 | 0.247203152 | 0.41807689  |
| cg19861632 | GPR125      | 4  | 0.00843244 | 0.280545431 | 0.390675338 |
| cg26126417 | GPR126;GPR  | 6  | 0.03336697 | 0.231049757 | 0.36411795  |
| cg01008088 | GPR133      | 12 | 0.01481001 | 0.349153207 | 0.593979296 |
| cg01056242 | GPR133      | 12 | 0.01756808 | 0.23643029  | 0.390177479 |
| cg01006048 | GPR158      | 10 | 0.00491727 | 0.724837755 | 0.854034981 |
| cg07632068 | GPR176      | 15 | 0.03514644 | 0.536344007 | 0.664645422 |
| cg12301301 | GPR177      | 1  | 0.00472698 | 0.718791311 | 0.867978949 |
| cg12528056 | GPR44       | 11 | 0.0002162  | 0.342461557 | 0.593153586 |
| cg08343644 | GPR56;GPR5  | 16 | 0.00918682 | 0.26895407  | 0.383672094 |
| cg19592277 | GPR75;LOC1  | 2  | 0.00048329 | 0.211056129 | 0.387360023 |
| cg01400468 | GPR75;LOC1  | 2  | 0.00618695 | 0.223389076 | 0.355143959 |
| cg11939825 | GPR75;LOC1  | 2  | 0.01640123 | 0.390798117 | 0.520982276 |
| cg10124812 | GPR75;LOC1  | 2  | 0.00452553 | 0.288370191 | 0.402249334 |
| cg19961545 | GPR75;LOC1  | 2  | 0.00159592 | 0.251582084 | 0.361952253 |
| cg09167413 | GPR98;GPR9  | 5  | 0.00093071 | 0.52061728  | 0.688878605 |
| cg18421360 | GPR98;GPR9  | 5  | 0.04392076 | 0.437139103 | 0.60308981  |
| cg01768433 | GPR98;GPR9  | 5  | 0.01418429 | 0.752983834 | 0.86816489  |
| cg19212391 | GPRC5C;GPR  | 17 | 0.00030835 | 0.623204979 | 0.781250883 |
| cg25400422 | GPS1;RFNG;C | 17 | 0.00078633 | 0.169599382 | 0.280324675 |
| cg14213590 | GPSM1       | 9  | 0.0023772  | 0.172115551 | 0.345993629 |
| cg14471064 | GPSM1       | 9  | 0.00081747 | 0.313714172 | 0.4772818   |
| cg21195231 | GPSM1       | 9  | 0.00163388 | 0.175672413 | 0.317779664 |
| cg13799504 | GPSM1       | 9  | 0.00600897 | 0.220642869 | 0.355201294 |
| cg13948456 | GPSM1       | 9  | 0.00060628 | 0.242458501 | 0.36409798  |
| cg22984256 | GPSM1       | 9  | 0.0003714  | 0.204464758 | 0.308133512 |
| cg14489965 | GPSM1;GPSM  | 9  | 0.00031979 | 0.411078584 | 0.631544755 |
| cg14555265 | GPSM1;GPSM  | 9  | 0.00267351 | 0.507405399 | 0.717545659 |
| cg14040131 | GPSM1;GPSM  | 9  | 0.00090174 | 0.233098022 | 0.442212957 |
| cg01393841 | GPSM1;GPSM  | 9  | 0.00054059 | 0.411399874 | 0.614480601 |
| cg14271150 | GPSM1;GPSM  | 9  | 0.00070468 | 0.390080149 | 0.551388833 |

|            |             |    |            |             |             |
|------------|-------------|----|------------|-------------|-------------|
| cg13705014 | GPSM1;GPSM  | 9  | 0.00038731 | 0.374786783 | 0.527808475 |
| cg14934821 | GPSM1;GPSM  | 9  | 0.00047393 | 0.221586453 | 0.372829747 |
| cg04305913 | GPSM1;GPSM  | 9  | 0.0033222  | 0.208060044 | 0.319858525 |
| cg14203108 | GPSM1;GPSM  | 9  | 0.00450576 | 0.334403481 | 0.43766704  |
| cg05241828 | GPT         | 8  | 0.00079924 | 0.235876351 | 0.447070598 |
| cg09957864 | GPT         | 8  | 0.00160763 | 0.259327231 | 0.468962509 |
| cg15983520 | GPT         | 8  | 0.00099321 | 0.410019947 | 0.612835284 |
| cg07658280 | GPT         | 8  | 0.0011279  | 0.352555792 | 0.544534544 |
| cg00280345 | GPT         | 8  | 0.01284441 | 0.175992908 | 0.3031778   |
| cg25600446 | GPT         | 8  | 0.00209834 | 0.250462104 | 0.376613351 |
| cg09265054 | GPT         | 8  | 0.00468098 | 0.11344378  | 0.217838868 |
| cg05380921 | GPT2;GPT2   | 16 | 0.01165918 | 0.233669431 | 0.383063507 |
| cg26155983 | GPX2        | 14 | 0.00434167 | 0.552083846 | 0.70853147  |
| cg06733347 | GRAMD2      | 15 | 0.00080874 | 0.40411175  | 0.551348077 |
| cg25356006 | GRAMD2      | 15 | 0.00864397 | 0.19605264  | 0.328294535 |
| cg04955856 | GRAMD4      | 22 | 0.00123805 | 0.397564439 | 0.566340074 |
| cg21811450 | GRAMD4      | 22 | 0.00222824 | 0.338561469 | 0.481486163 |
| cg03711562 | GRAP        | 17 | 0.00421059 | 0.328544799 | 0.443015357 |
| cg09150232 | GRB10       | 7  | 0.00875461 | 0.349804948 | 0.511932489 |
| cg18047172 | GRB10;GRB1  | 7  | 0.00383474 | 0.20530268  | 0.348088068 |
| cg01884715 | GRB2;GRB2   | 17 | 0.00940188 | 0.266710735 | 0.378261572 |
| cg02787989 | GREB1;GREB  | 2  | 0.00124465 | 0.380894887 | 0.511212141 |
| cg14605150 | GREM1       | 15 | 0.0473511  | 0.459798564 | 0.621823937 |
| cg13651876 | GRHPR       | 9  | 0.00122567 | 0.164202048 | 0.417635944 |
| cg07633435 | GRIA1;GRIA1 | 5  | 0.00349127 | 0.332659695 | 0.538577329 |
| cg19670474 | GRID2       | 4  | 0.00185542 | 0.566284472 | 0.703083782 |
| cg24539500 | GRIK2;GRIK2 | 6  | 0.00512572 | 0.764629194 | 0.871108961 |
| cg03866831 | GRIN2A;GRIN | 16 | 0.02481102 | 0.56236617  | 0.665439222 |
| cg16862319 | GRIN2B      | 12 | 0.03646706 | 0.191514792 | 0.29544449  |
| cg18001722 | GRK5        | 10 | 0.02692487 | 0.32106957  | 0.559768366 |
| cg13739115 | GRK5        | 10 | 0.01515434 | 0.137789973 | 0.314873852 |
| cg23537932 | GRK5        | 10 | 0.00178145 | 0.573396132 | 0.726411503 |
| cg17897352 | GRK5        | 10 | 0.00019716 | 0.387448577 | 0.526353553 |
| cg00522048 | GRK5        | 10 | 0.01339192 | 0.400887064 | 0.53513938  |
| cg24807198 | GRK5        | 10 | 0.00757765 | 0.250640711 | 0.379696014 |
| cg16395614 | GRK5        | 10 | 0.01728271 | 0.590609909 | 0.716768331 |
| cg10399824 | GRK5        | 10 | 0.01702839 | 0.621543834 | 0.735911247 |
| cg26759179 | GRK5        | 10 | 0.02191211 | 0.192191909 | 0.294348996 |
| cg00993388 | GRLF1       | 19 | 0.04685878 | 0.464122257 | 0.605519107 |
| cg00664406 | GRM2;GRM2   | 3  | 0.00039229 | 0.169740726 | 0.287779673 |
| cg00269140 | GRM3        | 7  | 0.00985115 | 0.579732563 | 0.719630332 |
| cg01331810 | GRM3        | 7  | 0.04336717 | 0.240075359 | 0.365989736 |
| cg04020590 | G RTP1      | 13 | 0.00832096 | 0.339985566 | 0.519050927 |
| cg26173173 | GSDMD;GSD   | 8  | 0.04974487 | 0.644166818 | 0.754365291 |
| cg10552496 | GSTP1       | 11 | 0.00108372 | 0.516598284 | 0.622058789 |
| cg13702181 | GSTZ1;GSTZ1 | 14 | 0.00015578 | 0.25285454  | 0.439791892 |

|            |            |    |            |             |             |
|------------|------------|----|------------|-------------|-------------|
| cg05738924 | GTDC1;GTDC | 2  | 0.04461663 | 0.183588127 | 0.328785413 |
| cg05878535 | GTF2F2     | 13 | 0.00392583 | 0.673753399 | 0.791488767 |
| cg27372015 | GTF3C1     | 16 | 0.00066002 | 0.207366526 | 0.41687803  |
| cg03598457 | GTF3C1     | 16 | 0.00139778 | 0.168309552 | 0.327086585 |
| cg05997801 | GTF3C1     | 16 | 0.00230721 | 0.500328663 | 0.602998303 |
| cg11386757 | GTPBP3;GTP | 19 | 0.02792649 | 0.426713928 | 0.542856383 |
| cg08058213 | GUCY1B3    | 4  | 0.02360659 | 0.718984187 | 0.84543311  |
| cg04157161 | GUCY2D     | 17 | 0.00224959 | 0.300062201 | 0.426822941 |
| cg19202813 | GULP1      | 2  | 0.01444909 | 0.449019947 | 0.634919269 |
| cg03392710 | GULP1      | 2  | 0.00082546 | 0.692823669 | 0.82858482  |
| cg12452952 | GULP1      | 2  | 0.00086235 | 0.804694041 | 0.907789998 |
| cg16335858 | GYLTL1B    | 11 | 0.00152032 | 0.301577214 | 0.458956035 |
| cg04647234 | H19        | 11 | 0.01333882 | 0.413304821 | 0.554105106 |
| cg09777856 | H2AFY2     | 10 | 0.00080849 | 0.726257882 | 0.831547762 |
| cg04566694 | H6PD       | 1  | 0.00684234 | 0.430750464 | 0.62304419  |
| cg16256342 | H6PD       | 1  | 0.00426214 | 0.562002931 | 0.68918596  |
| cg09025327 | H6PD       | 1  | 0.03912243 | 0.200419263 | 0.322057521 |
| cg17041101 | HACE1      | 6  | 0.0005017  | 0.817186206 | 0.938121387 |
| cg08297751 | HAND2      | 4  | 0.03079839 | 0.227046969 | 0.387930571 |
| cg25325949 | HAPLN1     | 5  | 0.00416419 | 0.332852192 | 0.518999965 |
| cg22006672 | HAPLN1     | 5  | 0.00203614 | 0.473189862 | 0.650802892 |
| cg01045835 | HAPLN1     | 5  | 0.03172666 | 0.262892498 | 0.421201899 |
| cg13420004 | HAPLN3     | 15 | 0.00627459 | 0.225934804 | 0.391446233 |
| cg08317426 | HAPLN3     | 15 | 0.00796999 | 0.451156239 | 0.578147172 |
| cg14544583 | HBB        | 11 | 0.00579668 | 0.703820514 | 0.806953917 |
| cg24803059 | HCCA2      | 11 | 0.000282   | 0.52292277  | 0.747943061 |
| cg22979615 | HCCA2      | 11 | 0.00040719 | 0.505517156 | 0.681344533 |
| cg21051815 | HCCA2      | 11 | 0.00185886 | 0.240310486 | 0.412981837 |
| cg03565674 | HCCA2      | 11 | 0.00091316 | 0.240473441 | 0.411876227 |
| cg15470102 | HCCA2      | 11 | 0.0013563  | 0.28597467  | 0.457322735 |
| cg09947611 | HCCA2      | 11 | 0.0236877  | 0.352106733 | 0.48721166  |
| cg13811955 | HCCA2      | 11 | 0.00451571 | 0.273857459 | 0.387264743 |
| cg26892308 | HCCA2      | 11 | 0.00141139 | 0.433987145 | 0.541512532 |
| cg07635249 | HCCA2      | 11 | 0.02986649 | 0.269128242 | 0.376131233 |
| cg20737909 | HCCA2      | 11 | 0.00462609 | 0.263962635 | 0.364818271 |
| cg25050723 | HCCA2;CTSD | 11 | 0.00015801 | 0.280337003 | 0.510855086 |
| cg10900641 | HCCA2;LOC4 | 11 | 0.00012974 | 0.264053343 | 0.430270972 |
| cg13978447 | HCCA2;LOC4 | 11 | 0.02251805 | 0.50732142  | 0.656315468 |
| cg08966208 | HCCA2;LOC4 | 11 | 0.00899731 | 0.141009793 | 0.247875158 |
| cg03934392 | HCCA2;LOC4 | 11 | 0.00283302 | 0.251427289 | 0.401260922 |
| cg23598212 | HCCA2;LOC4 | 11 | 0.00164383 | 0.242232478 | 0.350075376 |
| cg24764810 | HCG22      | 6  | 0.03794516 | 0.240801154 | 0.375936501 |
| cg15339960 | HCN1       | 5  | 0.02652374 | 0.708361435 | 0.812011677 |
| cg13337307 | HCRT       | 17 | 0.00331104 | 0.376758329 | 0.495384168 |
| cg06568490 | HDAC11;HDA | 3  | 0.00883875 | 0.254067069 | 0.415346742 |
| cg05446471 | HDAC11;HDA | 3  | 0.00079924 | 0.230028834 | 0.371023664 |

|            |            |    |            |             |             |
|------------|------------|----|------------|-------------|-------------|
| cg06855182 | HDAC4      | 2  | 0.00132155 | 0.228583387 | 0.502756162 |
| cg20924425 | HDAC4      | 2  | 0.00014988 | 0.288018816 | 0.555781548 |
| cg04869380 | HDAC4      | 2  | 0.00912511 | 0.232793411 | 0.402166021 |
| cg06609498 | HDAC4      | 2  | 0.00233359 | 0.186696819 | 0.344974634 |
| cg07554496 | HDAC4      | 2  | 0.03370877 | 0.325198921 | 0.475331386 |
| cg15933840 | HDAC4      | 2  | 0.03179853 | 0.287643188 | 0.426926427 |
| cg17410431 | HDAC4      | 2  | 0.02692164 | 0.110714521 | 0.246550419 |
| cg04841245 | HDAC4      | 2  | 0.00099064 | 0.208126815 | 0.343325107 |
| cg09664216 | HDAC4      | 2  | 0.00114335 | 0.617913909 | 0.749629724 |
| cg04216051 | HDAC4      | 2  | 0.0026016  | 0.544421541 | 0.671574739 |
| cg23870168 | HDAC4      | 2  | 0.00402974 | 0.16807524  | 0.292530718 |
| cg19770748 | HDAC4      | 2  | 0.00070108 | 0.420611918 | 0.544131459 |
| cg27012396 | HDAC4      | 2  | 0.01378268 | 0.223864077 | 0.341907364 |
| cg20854286 | HDAC4      | 2  | 0.0155803  | 0.609764037 | 0.721373225 |
| cg21656251 | HDAC4      | 2  | 0.00174523 | 0.563582337 | 0.672740692 |
| cg03475776 | HDAC4      | 2  | 0.01917689 | 0.312452134 | 0.415738074 |
| cg10071550 | HDAC4      | 2  | 0.01888053 | 0.09576615  | 0.198784598 |
| cg01641368 | HDAC4      | 2  | 0.0028302  | 0.454681419 | 0.556612627 |
| cg10138044 | HDAC4      | 2  | 0.0023655  | 0.220385153 | 0.321385621 |
| cg05684907 | HDAC9;HDAC | 7  | 0.00850445 | 0.382559909 | 0.602165456 |
| cg02329886 | HDC;HDC    | 15 | 0.03012148 | 0.226391651 | 0.32917105  |
| cg12853539 | HDDC2      | 6  | 0.0325359  | 0.473440566 | 0.603929698 |
| cg02839351 | HMGF2;HMGF | 19 | 0.04022882 | 0.358707352 | 0.459618042 |
| cg21464220 | HDLBP      | 2  | 0.00091461 | 0.324819744 | 0.531325225 |
| cg18969029 | HDLBP;HDLB | 2  | 0.01131552 | 0.609022387 | 0.723693403 |
| cg21663667 | HDLBP;HDLB | 2  | 0.00012823 | 0.684781822 | 0.788672483 |
| cg09386050 | HEATR2     | 7  | 0.0028151  | 0.402990037 | 0.595927464 |
| cg26014466 | HEATR2     | 7  | 0.00847987 | 0.612714247 | 0.771944211 |
| cg25620901 | HEATR2     | 7  | 0.03308213 | 0.460564032 | 0.580267779 |
| cg07570069 | HEATR5A    | 14 | 0.0006377  | 0.375787268 | 0.554879901 |
| cg01743658 | HEATR5A    | 14 | 0.00750419 | 0.405791039 | 0.534148225 |
| cg08125824 | HECTD1     | 14 | 0.02998441 | 0.773400086 | 0.874431184 |
| cg05606455 | HECW1      | 7  | 3.77E-05   | 0.221252373 | 0.349334915 |
| cg18477666 | HECW1      | 7  | 0.00972936 | 0.505447948 | 0.611192983 |
| cg14706455 | HEG1       | 3  | 0.00058864 | 0.195395665 | 0.348616173 |
| cg00213745 | HEG1       | 3  | 0.00263778 | 0.554794182 | 0.67552667  |
| cg01961092 | HELQ       | 4  | 0.02719647 | 0.57573249  | 0.707482398 |
| cg18432877 | HELZ       | 17 | 0.01190749 | 0.714387217 | 0.847379427 |
| cg13884295 | HEMK1      | 3  | 4.62E-05   | 0.672262207 | 0.777152943 |
| cg00067884 | HERC1      | 15 | 0.02845487 | 0.609841414 | 0.71480452  |
| cg11774232 | HERC2      | 15 | 0.00121139 | 0.499528242 | 0.649698397 |
| cg13166748 | HERC2      | 15 | 0.01223445 | 0.208979218 | 0.339430531 |
| cg10839322 | HERC2      | 15 | 0.01144918 | 0.545334698 | 0.671993979 |
| cg24660635 | HERC2      | 15 | 0.00301135 | 0.130580998 | 0.235062617 |
| cg08240383 | HHAT;HHAT; | 1  | 0.04608023 | 0.131468731 | 0.276597375 |
| cg20695534 | HHAT;HHAT; | 1  | 0.01888332 | 0.313225706 | 0.448090724 |

|            |              |    |            |             |             |
|------------|--------------|----|------------|-------------|-------------|
| cg25734421 | HHAT;HHAT;   | 1  | 0.00664898 | 0.699345554 | 0.823812573 |
| cg01123449 | HHIPL1       | 14 | 0.00661838 | 0.190244986 | 0.399387376 |
| cg20944928 | HIC2         | 22 | 0.0166834  | 0.372565112 | 0.494799583 |
| cg26025557 | HIGD1A;HIGI  | 3  | 0.01112935 | 0.630554575 | 0.777278165 |
| cg04954090 | HIGD1A;HIGI  | 3  | 0.00905266 | 0.766413169 | 0.890762327 |
| cg16272084 | HIP1         | 7  | 0.00033811 | 0.324521355 | 0.539331953 |
| cg02025034 | HIP1R        | 12 | 0.0081061  | 0.109251218 | 0.216063379 |
| cg22763590 | HIPK2;HIPK2  | 7  | 0.04467914 | 0.565037703 | 0.716905977 |
| cg10803309 | HIPK3;HIPK3  | 11 | 0.00012043 | 0.76479159  | 0.87165822  |
| cg22128300 | HIST1H1A     | 6  | 0.0074254  | 0.451729747 | 0.616611319 |
| cg01452110 | HIST1H3A     | 6  | 0.03040479 | 0.279970842 | 0.425070317 |
| cg03234702 | HIST1H3E     | 6  | 0.0027045  | 0.230168527 | 0.413690682 |
| cg11436222 | HIST1H3E     | 6  | 0.00014523 | 0.151790842 | 0.293332094 |
| cg15336091 | HIST1H4B     | 6  | 0.04270801 | 0.368894997 | 0.507499622 |
| cg12616114 | HIVEP2       | 6  | 0.00160315 | 0.56556336  | 0.705608747 |
| cg27169610 | HIVEP3;HIVE  | 1  | 0.00030288 | 0.51868032  | 0.729910529 |
| cg03450107 | HIVEP3;HIVE  | 1  | 0.00205801 | 0.652047546 | 0.804303618 |
| cg00542261 | HK1;HK1;HK1  | 10 | 0.00151723 | 0.1578696   | 0.392099955 |
| cg20520115 | HK2          | 2  | 0.00331902 | 0.27328418  | 0.382047844 |
| cg02010152 | HLA-DOB      | 6  | 0.00514533 | 0.639499746 | 0.752793762 |
| cg10850215 | HLA-DPB1     | 6  | 9.78E-05   | 0.152497573 | 0.334816674 |
| cg20223237 | HLA-DPB1     | 6  | 0.00294047 | 0.156556529 | 0.316203972 |
| cg02197634 | HLA-DPB1     | 6  | 0.01376677 | 0.167286247 | 0.310922974 |
| cg25511667 | HLA-DPB1     | 6  | 0.00288053 | 0.149711711 | 0.282776856 |
| cg13349035 | HLA-DPB1     | 6  | 0.00188995 | 0.159522349 | 0.291905709 |
| cg15829535 | HLA-DPB1     | 6  | 0.00744547 | 0.153518283 | 0.26443509  |
| cg19990651 | HLA-DPB1     | 6  | 0.01893513 | 0.105048571 | 0.215394199 |
| cg12893780 | HLA-DPB1     | 6  | 0.01523792 | 0.184968907 | 0.287147029 |
| cg00995368 | HLA-DQB1     | 6  | 0.01089914 | 0.539338049 | 0.66250576  |
| cg06032479 | HLA-DRB1     | 6  | 0.00215987 | 0.255127627 | 0.440964888 |
| cg17316649 | HLA-DRB1     | 6  | 0.00619877 | 0.143744247 | 0.299797114 |
| cg10765922 | HLA-DRB1     | 6  | 0.00035088 | 0.225242117 | 0.370201843 |
| cg12588917 | HLA-F;HLA-F; | 6  | 0.00771393 | 0.168672119 | 0.275127305 |
| cg27159583 | HLCS         | 21 | 0.02839145 | 0.132138262 | 0.28243154  |
| cg03419014 | HLCS         | 21 | 0.00577668 | 0.152109377 | 0.261540831 |
| cg08655206 | HLX          | 1  | 0.00312563 | 0.306587502 | 0.434965853 |
| cg09515921 | HLX          | 1  | 0.04793522 | 0.536730034 | 0.647074452 |
| cg10975889 | HLX          | 1  | 0.00050837 | 0.254553775 | 0.357295733 |
| cg15450098 | HLX          | 1  | 0.01530168 | 0.232081942 | 0.334563116 |
| cg14531576 | HMCN1;MIR!   | 1  | 0.00431181 | 0.195858456 | 0.359856275 |
| cg09996240 | HMG20B       | 19 | 0.00827157 | 0.725632142 | 0.848747832 |
| cg04939480 | HMGA2;HMC    | 12 | 0.04961421 | 0.296919727 | 0.403682423 |
| cg07355069 | HMGCS1;HM    | 5  | 0.0099287  | 0.514172913 | 0.656161135 |
| cg13976683 | HMGCS2;HM    | 1  | 0.02263157 | 0.209296542 | 0.313764774 |
| cg04587220 | HMHA1        | 19 | 0.00081604 | 0.324105815 | 0.443976175 |
| cg09828010 | HMP19        | 5  | 0.00059981 | 0.620378963 | 0.801079648 |



|            |             |    |            |             |             |
|------------|-------------|----|------------|-------------|-------------|
| cg14818176 | HN1;HN1;HN  | 17 | 0.01757038 | 0.447101749 | 0.629628917 |
| cg15441973 | HNMT;HNMT   | 2  | 0.00402507 | 0.645648434 | 0.759339359 |
| cg04463380 | HNRNPA1L2;  | 13 | 0.04118954 | 0.597167276 | 0.704266478 |
| cg19142553 | HNRNPA2B1;  | 7  | 0.00446668 | 0.293005829 | 0.399932524 |
| cg17002899 | HNRNPC;HNI  | 14 | 0.0034533  | 0.261123364 | 0.399476985 |
| cg10055655 | HNRNPD;HN   | 4  | 0.01868057 | 0.742432369 | 0.85550791  |
| cg03347015 | HNRNPUL2    | 11 | 0.00054057 | 0.501439209 | 0.613838569 |
| cg26983544 | HOMER1      | 5  | 0.04751536 | 0.432280641 | 0.584322021 |
| cg14935646 | HOXA10      | 7  | 0.0004309  | 0.280740797 | 0.39890132  |
| cg19817912 | HOXA3       | 7  | 0.00035207 | 0.581173799 | 0.774723084 |
| cg23876203 | HOXA3;HOXA  | 7  | 0.0144192  | 0.652109215 | 0.877914841 |
| cg07094847 | HOXA3;HOXA  | 7  | 0.00132937 | 0.496586287 | 0.683146197 |
| cg24469729 | HOXA3;HOXA  | 7  | 0.00560963 | 0.171369074 | 0.301818928 |
| cg12538674 | HOXA3;HOXA  | 7  | 0.04586715 | 0.517773063 | 0.632383623 |
| cg24389585 | HOXA5       | 7  | 0.00552988 | 0.419454655 | 0.630127159 |
| cg23245942 | HOXB9       | 17 | 0.00051123 | 0.144410411 | 0.276645032 |
| cg05349837 | HOXC4       | 12 | 0.00159069 | 0.149894232 | 0.29320319  |
| cg00567703 | HOXC4;HOXC  | 12 | 0.03612283 | 0.267392229 | 0.378939785 |
| cg25903363 | HR;HR       | 8  | 0.01552804 | 0.274655464 | 0.402806944 |
| cg12989344 | HRAS;HRAS;f | 11 | 0.00023227 | 0.598041771 | 0.766628037 |
| cg14345676 | HRH2;HRH2;  | 5  | 0.01849442 | 0.227409833 | 0.390036628 |
| cg02376668 | HRNBP3      | 17 | 0.00591777 | 0.237621174 | 0.362248998 |
| cg24366429 | HRNBP3      | 17 | 0.00200052 | 0.27692526  | 0.394012896 |
| cg08319103 | HRNBP3      | 17 | 0.00205432 | 0.316167841 | 0.423401748 |
| cg24895178 | HS3ST3B1;M  | 17 | 0.00308431 | 0.599421457 | 0.756427178 |
| cg17863312 | HS3ST3B1;M  | 17 | 0.02510964 | 0.555381097 | 0.673946306 |
| cg05916059 | HS3ST4      | 16 | 0.00349802 | 0.696415135 | 0.798220296 |
| cg11416620 | HS6ST1      | 2  | 3.75E-05   | 0.381037745 | 0.55163998  |
| cg27405010 | HSBP1       | 16 | 0.00030599 | 0.372023249 | 0.581721017 |
| cg05315365 | HSD17B2     | 16 | 0.00982447 | 0.29485894  | 0.422115141 |
| cg15854333 | HSD17B8;SLC | 6  | 0.01239672 | 0.188533507 | 0.33212718  |
| cg22896793 | HSPA12B     | 20 | 7.91E-05   | 0.315759069 | 0.431828747 |
| cg13320181 | HSPB7       | 1  | 0.00204921 | 0.147694976 | 0.26058347  |
| cg11421972 | HSPB7       | 1  | 0.00682442 | 0.491524234 | 0.601639451 |
| cg16110455 | HSPB7;HSPB  | 1  | 0.00359241 | 0.263935253 | 0.364393683 |
| cg07168142 | HSPB9;KAT2/ | 17 | 0.00821068 | 0.158025315 | 0.292417247 |
| cg21945949 | HSPC159     | 2  | 0.0044971  | 0.244180408 | 0.486712123 |
| cg25138553 | HSPG2       | 1  | 0.02714334 | 0.091719503 | 0.192739023 |
| cg17637877 | HTR3B       | 11 | 0.00342006 | 0.731341115 | 0.832769378 |
| cg02299946 | HTRA1       | 10 | 0.04453161 | 0.283802978 | 0.399721596 |
| cg12636882 | HTT         | 4  | 0.00661079 | 0.557401332 | 0.666239178 |
| cg11173579 | HUNK        | 21 | 0.01381784 | 0.22731867  | 0.365189277 |
| cg11962566 | HYOU1;HYOU  | 11 | 0.04440065 | 0.241972092 | 0.363232981 |
| cg03023900 | ICAM2;ICAM  | 17 | 0.00211073 | 0.695718531 | 0.819603216 |
| cg21901386 | ICAM3       | 19 | 0.00864964 | 0.660200132 | 0.770550581 |
| cg04295144 | ICAM5       | 19 | 0.00556323 | 0.124620167 | 0.2661243   |

|            |                 |    |            |             |             |
|------------|-----------------|----|------------|-------------|-------------|
| cg22871801 | IFFO2           | 1  | 3.77E-05   | 0.669593828 | 0.769985022 |
| cg03065308 | IFNGR1          | 6  | 0.00738291 | 0.243791355 | 0.425096651 |
| cg02102832 | IFT140          | 16 | 0.00166906 | 0.536025135 | 0.748842873 |
| cg07994487 | IFT140;TMEN     | 16 | 4.94E-05   | 0.447655071 | 0.730961633 |
| cg00939684 | IFT140;TMEN     | 16 | 0.00799097 | 0.494428888 | 0.671403782 |
| cg26552163 | IFT140;TMEN     | 16 | 0.00309941 | 0.370867925 | 0.539823894 |
| cg08880369 | IFT140;TMEN     | 16 | 0.00011753 | 0.464470413 | 0.623171322 |
| cg08006309 | IFT140;TMEN     | 16 | 0.04036199 | 0.482295642 | 0.636213521 |
| cg02307681 | IFT140;TMEN     | 16 | 0.00155684 | 0.193600289 | 0.342468068 |
| cg03204177 | IFT81;IFT81;I   | 12 | 0.00317689 | 0.592396403 | 0.722139663 |
| cg12544411 | IGDCC3          | 15 | 0.00597188 | 0.523013464 | 0.664716361 |
| cg24676120 | IGF1;IGF1;IGI   | 12 | 0.03027531 | 0.19506646  | 0.358429098 |
| cg12402183 | IGF1R           | 15 | 0.00589897 | 0.249863714 | 0.469601362 |
| cg06671623 | IGF1R           | 15 | 0.01396845 | 0.197704933 | 0.387696343 |
| cg20388729 | IGF1R           | 15 | 0.00140089 | 0.584539972 | 0.743666125 |
| cg05075416 | IGF1R           | 15 | 0.00899327 | 0.456098331 | 0.602780288 |
| cg20966754 | IGF2BP1;IGF:    | 17 | 0.00808333 | 0.185531889 | 0.323314409 |
| cg23596986 | IGF2BP1;IGF:    | 17 | 0.00289205 | 0.197772622 | 0.298555106 |
| cg12754982 | IGF2R           | 6  | 0.00733833 | 0.473591701 | 0.596120107 |
| cg05830618 | IGSF5           | 21 | 0.00405903 | 0.433146832 | 0.553700187 |
| cg13088568 | IHH             | 2  | 0.04620659 | 0.372513421 | 0.486673012 |
| cg15096505 | IL10            | 1  | 0.01418884 | 0.170769549 | 0.335728501 |
| cg03662459 | IL11RA;IL11R    | 9  | 0.00767435 | 0.429719179 | 0.558254105 |
| cg27292389 | IL15RA;IL15R    | 10 | 0.00151144 | 0.537384649 | 0.730006111 |
| cg25580782 | IL15RA;IL15R    | 10 | 0.00392389 | 0.224325806 | 0.412153784 |
| cg05042034 | IL16            | 15 | 0.03215759 | 0.420398048 | 0.554314309 |
| cg14898127 | IL16;IL16;IL1   | 15 | 0.00743397 | 0.546512605 | 0.700718676 |
| cg03876697 | IL17B           | 5  | 0.00030748 | 0.434803652 | 0.562739763 |
| cg05860978 | IL17B           | 5  | 0.00250087 | 0.359145617 | 0.483927948 |
| cg24394667 | IL1RL2          | 2  | 0.00189474 | 0.42560979  | 0.589008047 |
| cg12663550 | IL1RL2          | 2  | 0.02646067 | 0.530782568 | 0.649131112 |
| cg18145937 | IL4;IL4         | 5  | 0.00615346 | 0.160350969 | 0.266548411 |
| cg12377972 | IL4;IL4;IL4;IL4 | 5  | 0.02968659 | 0.607273077 | 0.715836247 |
| cg05934682 | IL4I1;IL4I1     | 19 | 0.00349736 | 0.232285971 | 0.36104991  |
| cg07998387 | IL6             | 7  | 0.01602576 | 0.435234416 | 0.580652384 |
| cg25089598 | ILK;ILK;ILK     | 11 | 0.00917449 | 0.45875811  | 0.564101981 |
| cg19798735 | IMMP2L;LRR      | 7  | 0.03816377 | 0.332109963 | 0.432736782 |
| cg09640202 | IMP4            | 2  | 0.0044971  | 0.708971466 | 0.811520959 |
| cg05893902 | IMPG2           | 3  | 0.02354739 | 0.506195829 | 0.666043632 |
| cg26122413 | INF2;INF2       | 14 | 0.00026369 | 0.390780678 | 0.659467199 |
| cg16147932 | INF2;INF2;IN    | 14 | 0.0078614  | 0.194155582 | 0.337310672 |
| cg23998240 | INF2;INF2;IN    | 14 | 0.01595764 | 0.318280785 | 0.427859162 |
| cg05877565 | INHBA;LOC2      | 7  | 0.01375833 | 0.293064884 | 0.412114302 |
| cg18676273 | INHBA;LOC2      | 7  | 0.0070625  | 0.158536348 | 0.269129544 |
| cg05132222 | INO80           | 15 | 0.00147517 | 0.298895225 | 0.452348866 |
| cg18767920 | INO80C;INO      | 18 | 0.03956712 | 0.109009133 | 0.248947209 |

|            |               |    |            |             |             |
|------------|---------------|----|------------|-------------|-------------|
| cg01169610 | INPP4A;INPP   | 2  | 0.00302372 | 0.447035049 | 0.626722648 |
| cg16469046 | INPP4A;INPP   | 2  | 0.03447263 | 0.325091626 | 0.485111383 |
| cg03403093 | INPP4A;INPP   | 2  | 0.0028542  | 0.231769457 | 0.359343112 |
| cg10773526 | INPP4B;INPP   | 4  | 0.0012831  | 0.600109263 | 0.729910719 |
| cg12449716 | INPP5A        | 10 | 0.00016884 | 0.513431312 | 0.712110102 |
| cg11740348 | INPP5A        | 10 | 0.02167547 | 0.40060244  | 0.557170262 |
| cg16627236 | INPP5A        | 10 | 0.02235404 | 0.436000201 | 0.580621689 |
| cg07249433 | INPP5A        | 10 | 0.01168599 | 0.401032903 | 0.541431385 |
| cg18121190 | INPP5A        | 10 | 0.00072914 | 0.447711161 | 0.576621491 |
| cg02668055 | INPP5A        | 10 | 0.00315753 | 0.233898805 | 0.354918431 |
| cg02836764 | INPP5A        | 10 | 0.02754193 | 0.678493488 | 0.795620988 |
| cg19649172 | INPP5A        | 10 | 0.00895194 | 0.168111072 | 0.276047084 |
| cg08287211 | INPP5A        | 10 | 0.00652095 | 0.112248003 | 0.21467346  |
| cg21140843 | INPP5K;INPP   | 17 | 0.00255974 | 0.231999097 | 0.417610102 |
| cg20720680 | INPL1         | 11 | 0.00174517 | 0.254468658 | 0.409241826 |
| cg00221747 | INS-IGF2;IGF  | 11 | 0.0012433  | 0.62675305  | 0.730124519 |
| cg06399933 | INSC          | 11 | 0.01530789 | 0.147233866 | 0.305791098 |
| cg06049367 | INSC;INSC     | 11 | 0.00079296 | 0.258960712 | 0.458093251 |
| cg20523653 | INSC;INSC     | 11 | 0.00658257 | 0.148828889 | 0.288863685 |
| cg21528729 | INSIG1;INSIG  | 7  | 0.01911024 | 0.785421986 | 0.935629464 |
| cg09779027 | INSR;INSR     | 19 | 0.01199601 | 0.186984569 | 0.324910754 |
| cg11780053 | INSR;INSR     | 19 | 0.00238262 | 0.168634812 | 0.274165581 |
| cg11396267 | INTS1         | 7  | 0.00036376 | 0.615490242 | 0.721567979 |
| cg16926712 | INTS9;INTS9;  | 8  | 0.00590156 | 0.125653999 | 0.24759512  |
| cg22131726 | IPCEF1;IPCEF  | 6  | 0.02781104 | 0.140036633 | 0.282929806 |
| cg14255700 | IPPK          | 9  | 8.66E-05   | 0.223968352 | 0.499718853 |
| cg13577194 | IPPK          | 9  | 0.00049358 | 0.421076132 | 0.683022687 |
| cg16686273 | IQCE;IQCE     | 7  | 0.0034389  | 0.263268892 | 0.482400138 |
| cg04919592 | IQCE;IQCE     | 7  | 0.01110537 | 0.292291544 | 0.413318439 |
| cg09159452 | IQCE;IQCE     | 7  | 0.0140388  | 0.26346049  | 0.377759876 |
| cg08494871 | IQCK          | 16 | 0.01475413 | 0.269175386 | 0.384706843 |
| cg18459152 | IQGAP2        | 5  | 0.00346346 | 0.457325981 | 0.679913355 |
| cg24380053 | IQSEC1        | 3  | 0.00047393 | 0.203290934 | 0.439892555 |
| cg16192821 | IQSEC1        | 3  | 0.00164505 | 0.135127179 | 0.264629007 |
| cg02109605 | IQSEC1        | 3  | 0.01010697 | 0.116885619 | 0.235518365 |
| cg17554647 | IQSEC1;IQSE   | 3  | 0.01194417 | 0.127585475 | 0.302367237 |
| cg18000764 | IQSEC1;IQSE   | 3  | 0.00048643 | 0.626997594 | 0.751565289 |
| cg27587780 | IRF1          | 5  | 0.00371657 | 0.446825483 | 0.567954473 |
| cg22016995 | IRF7;IRF7;IRF | 11 | 0.00149397 | 0.297399113 | 0.42284007  |
| cg14283647 | IRS1          | 2  | 0.00105476 | 0.301483443 | 0.506699263 |
| cg00912573 | IRS1          | 2  | 0.00555862 | 0.301263799 | 0.472326137 |
| cg00305996 | IRS1          | 2  | 0.03111688 | 0.144149126 | 0.292972484 |
| cg04129548 | IRS1          | 2  | 0.01498945 | 0.264285921 | 0.399482896 |
| cg13008631 | IRS1          | 2  | 0.00405632 | 0.335464632 | 0.460129135 |
| cg05195566 | ISLR          | 15 | 0.01103908 | 0.202099481 | 0.323140975 |
| cg12719753 | ISLR;ISLR;ISL | 15 | 0.00586177 | 0.200995212 | 0.313361888 |

|            |                |    |            |             |             |
|------------|----------------|----|------------|-------------|-------------|
| cg22161383 | ISYNA1;ISYN    | 19 | 0.02269517 | 0.40592137  | 0.530438087 |
| cg01065977 | ISYNA1;ISYN    | 19 | 0.00272757 | 0.274118632 | 0.392353304 |
| cg06462663 | ISYNA1;ISYN    | 19 | 0.03799239 | 0.753801136 | 0.858312016 |
| cg24935345 | ITGA1          | 5  | 0.00239348 | 0.547678375 | 0.733617431 |
| cg05036937 | ITGA2          | 5  | 0.00900175 | 0.434135495 | 0.596182755 |
| cg00522231 | ITGB1BP1;ITC   | 2  | 0.00403952 | 0.131526302 | 0.252825898 |
| cg05742728 | ITGB2;ITGB2    | 21 | 0.02113466 | 0.602491317 | 0.742707507 |
| cg03013554 | ITGB2;ITGB2    | 21 | 0.00508185 | 0.436092449 | 0.568292662 |
| cg22162848 | ITGB4;ITGB4    | 17 | 0.00263407 | 0.172808391 | 0.286475458 |
| cg13613634 | ITGB6          | 2  | 0.01889715 | 0.657598237 | 0.78237882  |
| cg15889057 | ITGB7          | 12 | 0.00703441 | 0.505863297 | 0.651608099 |
| cg22070156 | ITGBL1;ITGBI   | 13 | 0.00713666 | 0.144115398 | 0.27780469  |
| cg21116266 | ITGBL1;ITGBI   | 13 | 0.00714922 | 0.149288675 | 0.262388717 |
| cg07464094 | ITIH3          | 3  | 0.00018759 | 0.44514899  | 0.559273015 |
| cg18994033 | ITM2C;ITM2C    | 2  | 0.01989802 | 0.210210198 | 0.31621539  |
| cg09837298 | ITPK1;ITPK1;I  | 14 | 0.00049241 | 0.615189609 | 0.75638698  |
| cg16426321 | ITPK1;ITPK1;I  | 14 | 0.00437567 | 0.57551281  | 0.699312159 |
| cg19827511 | ITPK1;ITPK1;I  | 14 | 0.01946735 | 0.641237761 | 0.742140129 |
| cg02047547 | ITPRIPL2;ITPFI | 16 | 0.00067214 | 0.227563841 | 0.341858699 |
| cg05139187 | ITSN2;ITSN2;   | 2  | 0.00271886 | 0.217420748 | 0.400205316 |
| cg26005086 | JAG1           | 20 | 0.0003561  | 0.311570476 | 0.548920004 |
| cg05796838 | JAK3           | 19 | 0.00023183 | 0.212393663 | 0.425604921 |
| cg14983763 | JAKMIP3        | 10 | 0.01258668 | 0.292953437 | 0.435319267 |
| cg06493612 | JARID2         | 6  | 0.00185235 | 0.323364417 | 0.492264882 |
| cg14009473 | JARID2         | 6  | 0.03613261 | 0.366412677 | 0.530198284 |
| cg22982811 | JAZF1          | 7  | 0.00466377 | 0.352815191 | 0.572151665 |
| cg17702455 | JAZF1          | 7  | 0.01622933 | 0.196849608 | 0.370398769 |
| cg17052756 | JAZF1          | 7  | 0.00071993 | 0.547521443 | 0.682892395 |
| cg22377814 | JAZF1          | 7  | 0.02215588 | 0.49585027  | 0.630830731 |
| cg01919011 | JDP2;JDP2;JD   | 14 | 0.00866352 | 0.185332242 | 0.305541691 |
| cg07128233 | JMJD1C         | 10 | 0.00117306 | 0.608413103 | 0.766470387 |
| cg19495650 | JMJD1C         | 10 | 0.04614192 | 0.273208509 | 0.382022212 |
| cg13038025 | JMJD7-PLA2C    | 15 | 0.00011921 | 0.424168622 | 0.593856286 |
| cg16668397 | JPH3           | 16 | 0.00204167 | 0.239412834 | 0.403211527 |
| cg02972715 | JPH4;JPH4      | 14 | 0.00672225 | 0.348749655 | 0.458072401 |
| cg15386103 | JUP;JUP        | 17 | 0.04648905 | 0.440462675 | 0.548781288 |
| cg14688451 | KALRN;KALRI    | 3  | 0.00283284 | 0.210187166 | 0.420018166 |
| cg23440058 | KALRN;KALRI    | 3  | 0.04435809 | 0.419556859 | 0.527668751 |
| cg06690085 | KALRN;KALRI    | 3  | 0.03643743 | 0.110299005 | 0.214716931 |
| cg13516362 | KANK2          | 19 | 0.03197183 | 0.159003397 | 0.27021719  |
| cg04211018 | KANK4          | 1  | 0.01467752 | 0.312239769 | 0.439491912 |
| cg07949011 | KANK4          | 1  | 0.01798227 | 0.18242469  | 0.309227961 |
| cg06133771 | KATNB1         | 16 | 0.01142867 | 0.423586474 | 0.562604328 |
| cg05962092 | KCNA7          | 19 | 0.02537165 | 0.13258367  | 0.237284811 |
| cg25731943 | KCNAB1;KCN     | 3  | 7.01E-05   | 0.153914386 | 0.295549825 |
| cg15731035 | KCNAB2;KCN     | 1  | 0.03816104 | 0.53351328  | 0.649309674 |

|            |             |    |            |             |             |
|------------|-------------|----|------------|-------------|-------------|
| cg21017569 | KCNAB3      | 17 | 0.0015398  | 0.310965462 | 0.477602412 |
| cg13407335 | KCNAB3      | 17 | 0.01093878 | 0.199370337 | 0.359290671 |
| cg13377102 | KCNAB3      | 17 | 0.00177863 | 0.285482119 | 0.443866161 |
| cg01323777 | KCNAB3      | 17 | 0.00527678 | 0.184934199 | 0.326566737 |
| cg16513459 | KCNAB3      | 17 | 0.00113189 | 0.190512843 | 0.327016568 |
| cg15951188 | KCNAB3      | 17 | 0.00183826 | 0.382390068 | 0.490135048 |
| cg23365801 | KCNAB3      | 17 | 0.00945506 | 0.169576931 | 0.272698669 |
| cg22572258 | KCND2       | 7  | 0.00637775 | 0.688616123 | 0.816642027 |
| cg26736645 | KCNE1;KCNE  | 21 | 0.00056439 | 0.546334158 | 0.703980685 |
| cg05591210 | KCNE3       | 11 | 0.00928084 | 0.501354738 | 0.636227246 |
| cg17526887 | KCNE4       | 2  | 0.00967651 | 0.270106087 | 0.400814142 |
| cg15510325 | KCNH2;KCNH  | 7  | 0.00169404 | 0.638005511 | 0.766443993 |
| cg19264163 | KCNH8       | 3  | 0.00053355 | 0.488419606 | 0.695550439 |
| cg00948250 | KCNJ10      | 1  | 0.04877197 | 0.327773274 | 0.459153815 |
| cg03746851 | KCNJ12      | 17 | 0.0057909  | 0.349786376 | 0.469231354 |
| cg10222534 | KCNJ14;KCNJ | 19 | 0.00557002 | 0.190953635 | 0.409098934 |
| cg00848374 | KCNK2;KCNK  | 1  | 0.01069337 | 0.297691782 | 0.47557217  |
| cg21388745 | KCNK5       | 6  | 0.01292076 | 0.364924782 | 0.544641556 |
| cg12614113 | KCNMA1;KCN  | 10 | 0.00301135 | 0.375469039 | 0.598740011 |
| cg19427642 | KCNMA1;KCN  | 10 | 0.00409199 | 0.383162373 | 0.585438651 |
| cg07210187 | KCNMA1;KCN  | 10 | 0.00721616 | 0.26892873  | 0.45906892  |
| cg02727484 | KCNMA1;KCN  | 10 | 0.01473008 | 0.13672609  | 0.308279296 |
| cg07029975 | KCNMA1;KCN  | 10 | 0.01577804 | 0.476772218 | 0.62495707  |
| cg07972159 | KCNMA1;KCN  | 10 | 0.00464936 | 0.568936071 | 0.694076337 |
| cg03299991 | KCNMA1;KCN  | 10 | 0.00015929 | 0.201683652 | 0.321312836 |
| cg24529771 | KCNMB3;KCN  | 3  | 0.01418884 | 0.264365122 | 0.431983987 |
| cg13396821 | KCNN3;KCNN  | 1  | 0.00313066 | 0.201973137 | 0.394402124 |
| cg26504422 | KCNN4       | 19 | 0.00078633 | 0.322405353 | 0.617997578 |
| cg22904711 | KCNN4       | 19 | 0.00058797 | 0.200866474 | 0.351592735 |
| cg19698309 | KCNQ1       | 11 | 0.01960128 | 0.297987    | 0.40721927  |
| cg04907802 | KCNQ1;KCNC  | 11 | 0.0004215  | 0.545981755 | 0.762395002 |
| cg08376310 | KCNQ1;KCNC  | 11 | 0.00114461 | 0.245826703 | 0.39394593  |
| cg06960356 | KCNQ1;KCNC  | 11 | 3.89E-05   | 0.299627653 | 0.445285987 |
| cg07979757 | KCNQ1;KCNC  | 11 | 0.0002722  | 0.254184667 | 0.386169711 |
| cg19388050 | KCNQ1;KCNC  | 11 | 0.00030589 | 0.607629762 | 0.734680118 |
| cg24725201 | KCNQ1;KCNC  | 11 | 8.49E-05   | 0.580037513 | 0.690935406 |
| cg15686157 | KCNQ1;KCNC  | 11 | 0.01204026 | 0.287324432 | 0.395043817 |
| cg21752270 | KCNQ1;KCNC  | 11 | 0.00308214 | 0.427944834 | 0.535369469 |
| cg03512098 | KCNQ1;KCNC  | 11 | 0.00108372 | 0.166605418 | 0.272273414 |
| cg12427469 | KCNQ1;KCNC  | 11 | 0.00940268 | 0.218951664 | 0.320046901 |
| cg13880539 | KCNQ1;KCNC  | 11 | 0.00900684 | 0.190395428 | 0.366866467 |
| cg19672982 | KCNQ1;KCNC  | 11 | 0.00120283 | 0.430346125 | 0.575168427 |
| cg02180189 | KCNQ1;KCNC  | 11 | 0.00064112 | 0.43076102  | 0.544590875 |
| cg15861694 | KCNQ1;KCNC  | 11 | 0.00056439 | 0.509076755 | 0.614141076 |
| cg01693193 | KCNQ1;KCNC  | 11 | 0.00565723 | 0.523534576 | 0.626397685 |
| cg14245619 | KCNQ2;KCNC  | 20 | 0.01059878 | 0.391555437 | 0.530706956 |

|            |             |    |            |             |             |
|------------|-------------|----|------------|-------------|-------------|
| cg05165559 | KCNQ2;KCNQ  | 20 | 0.00516398 | 0.471600223 | 0.572380681 |
| cg23109867 | KCNQ4;KCNQ  | 1  | 0.00798787 | 0.441589304 | 0.541872525 |
| cg05203217 | KCNS1       | 20 | 0.0133082  | 0.21109964  | 0.326577345 |
| cg07338584 | KCNU1       | 8  | 0.02084162 | 0.225994027 | 0.347232111 |
| cg00044299 | KCTD1;KCTD  | 18 | 0.04141711 | 0.760154808 | 0.863836483 |
| cg01080424 | KDEL2;KDEL  | 7  | 0.00038095 | 0.190275949 | 0.430758201 |
| cg01640635 | KDEL3;KDEL  | 22 | 0.00102138 | 0.173092577 | 0.327353153 |
| cg03967533 | KDM1A;KDM   | 1  | 0.00411751 | 0.782210646 | 0.887042141 |
| cg21166985 | KDM2B;KDM   | 12 | 3.77E-05   | 0.19858547  | 0.388893563 |
| cg16062733 | KDM2B;KDM   | 12 | 0.01518171 | 0.297772457 | 0.476995806 |
| cg25482146 | KDM2B;KDM   | 12 | 0.0001064  | 0.277937489 | 0.452844262 |
| cg11724984 | KDM2B;KDM   | 12 | 0.00012704 | 0.572104747 | 0.723637131 |
| cg23972735 | KDM2B;KDM   | 12 | 0.0003098  | 0.215358436 | 0.347891532 |
| cg06024930 | KDM2B;KDM   | 12 | 0.00078297 | 0.341020068 | 0.472906223 |
| cg06646494 | KDM2B;KDM   | 12 | 8.11E-05   | 0.402533199 | 0.510162298 |
| cg00946598 | KDM4A       | 1  | 0.00024695 | 0.436632048 | 0.592404934 |
| cg08462360 | KDM4A       | 1  | 0.02487885 | 0.390717713 | 0.503240792 |
| cg20098875 | KDM4B       | 19 | 0.00477806 | 0.563541906 | 0.734077276 |
| cg02577963 | KDM4B       | 19 | 0.00084169 | 0.386911948 | 0.551229259 |
| cg02842850 | KDM4B       | 19 | 0.00011804 | 0.280753393 | 0.442737769 |
| cg03310779 | KDM4B       | 19 | 7.39E-05   | 0.549432525 | 0.703017231 |
| cg15705062 | KDM4B       | 19 | 2.43E-05   | 0.657524556 | 0.80136276  |
| cg10821320 | KDM4B       | 19 | 0.00472683 | 0.58383128  | 0.724021448 |
| cg22079102 | KDM4B       | 19 | 0.01818658 | 0.419873959 | 0.541100158 |
| cg10612065 | KDM4B       | 19 | 0.02483824 | 0.583059471 | 0.696066855 |
| cg14010696 | KDM4B       | 19 | 0.03925071 | 0.389102435 | 0.492720566 |
| cg24214903 | KDM4B       | 19 | 0.01369798 | 0.400406459 | 0.5010492   |
| cg13935079 | KDM4C;KDM   | 9  | 0.04473238 | 0.195739344 | 0.300803355 |
| cg14438634 | KDM4C;KDM   | 9  | 0.01055555 | 0.676619702 | 0.808993026 |
| cg16957323 | KDM6B       | 17 | 9.51E-05   | 0.569844112 | 0.690339641 |
| cg01586432 | KEAP1;KEAP  | 19 | 0.01671624 | 0.181664638 | 0.375489784 |
| cg24936273 | KHDRBS2     | 6  | 0.01407933 | 0.730747004 | 0.839391132 |
| cg26657404 | KIAA0182;KI | 16 | 0.00037711 | 0.313347512 | 0.540615029 |
| cg04372823 | KIAA0182;KI | 16 | 0.00467654 | 0.297639567 | 0.483444605 |
| cg00168118 | KIAA0182;KI | 16 | 0.00220092 | 0.300400772 | 0.445522418 |
| cg03004860 | KIAA0182;KI | 16 | 0.02692682 | 0.643863204 | 0.766940248 |
| cg00128386 | KIAA0182;KI | 16 | 0.00012086 | 0.439488905 | 0.555102791 |
| cg05441854 | KIAA0182;KI | 16 | 0.01113625 | 0.366301421 | 0.479642707 |
| cg08899895 | KIAA0182;KI | 16 | 0.00214085 | 0.190921615 | 0.303059668 |
| cg05245094 | KIAA0182;KI | 16 | 0.01926889 | 0.655042248 | 0.76643718  |
| cg09205083 | KIAA0182;KI | 16 | 0.01004861 | 0.313472372 | 0.423578998 |
| cg22455529 | KIAA0195    | 17 | 0.00083967 | 0.30141661  | 0.503332825 |
| cg27089714 | KIAA0196    | 8  | 0.02720624 | 0.477521292 | 0.608525143 |
| cg25289457 | KIAA0240    | 6  | 0.00451924 | 0.203575792 | 0.409091795 |
| cg03505866 | KIAA0247    | 14 | 0.00088306 | 0.270819365 | 0.474213403 |
| cg18163342 | KIAA0284;KI | 14 | 0.00484728 | 0.122781246 | 0.224418595 |

|            |              |    |            |             |             |
|------------|--------------|----|------------|-------------|-------------|
| cg18618674 | KIAA0528     | 12 | 0.03183468 | 0.855183758 | 0.970160884 |
| cg16964673 | KIAA0562;DF  | 1  | 0.00748977 | 0.23202387  | 0.332166942 |
| cg01132515 | KIAA0664     | 17 | 0.01117589 | 0.604418842 | 0.778787997 |
| cg05389310 | KIAA0664     | 17 | 0.01027243 | 0.324612496 | 0.454299944 |
| cg27498545 | KIAA0802     | 18 | 0.01077128 | 0.528022763 | 0.674365157 |
| cg17226446 | KIAA0922;KI/ | 4  | 0.01767078 | 0.290647272 | 0.472612385 |
| cg15733729 | KIAA1026;KI/ | 1  | 0.01454003 | 0.539209373 | 0.685970025 |
| cg22723001 | KIAA1026;KI/ | 1  | 0.00651901 | 0.620002663 | 0.720589039 |
| cg20958628 | KIAA1026;KI/ | 1  | 0.00523895 | 0.653555272 | 0.768108195 |
| cg08468082 | KIAA1026;KI/ | 1  | 0.00251421 | 0.411952273 | 0.561344639 |
| cg03995434 | KIAA1147     | 7  | 0.00756511 | 0.191136423 | 0.305647127 |
| cg12380772 | KIAA1161     | 9  | 0.01634454 | 0.213468817 | 0.333255403 |
| cg19505458 | KIAA1217;KI/ | 10 | 0.0102351  | 0.123351405 | 0.23598484  |
| cg22192454 | KIAA1267     | 17 | 0.02096601 | 0.616585096 | 0.740329975 |
| cg13732302 | KIAA1267     | 17 | 0.01298554 | 0.468311107 | 0.590694915 |
| cg24775327 | KIAA1274     | 10 | 0.00524184 | 0.300363633 | 0.504131189 |
| cg17239876 | KIAA1274     | 10 | 0.01685642 | 0.265622214 | 0.429394195 |
| cg24812143 | KIAA1274     | 10 | 0.01898072 | 0.311871287 | 0.468037911 |
| cg18295923 | KIAA1409     | 14 | 0.00603754 | 0.463867365 | 0.586134968 |
| cg19603836 | KIAA1462     | 10 | 0.00216053 | 0.504846876 | 0.675907634 |
| cg13661330 | KIAA1462     | 10 | 0.00048607 | 0.493660311 | 0.642257918 |
| cg12478578 | KIAA1522     | 1  | 0.00171005 | 0.450204659 | 0.662125147 |
| cg04892182 | KIAA1522     | 1  | 0.00461952 | 0.249635082 | 0.439379608 |
| cg16007395 | KIAA1522     | 1  | 0.00107003 | 0.539232773 | 0.682926393 |
| cg00528191 | KIAA1522     | 1  | 0.00091054 | 0.41363811  | 0.554135102 |
| cg11197101 | KIAA1522     | 1  | 0.02234066 | 0.090610917 | 0.198754228 |
| cg06786238 | KIAA1522     | 1  | 0.02552774 | 0.183337234 | 0.285633996 |
| cg21182616 | KIAA1530     | 4  | 0.02344121 | 0.420874798 | 0.616662824 |
| cg00731886 | KIAA1530     | 4  | 0.03829625 | 0.520316154 | 0.675284171 |
| cg04173688 | KIAA1530     | 4  | 0.01021616 | 0.660207863 | 0.806871013 |
| cg14029580 | KIAA1530     | 4  | 0.03622791 | 0.493609178 | 0.630188392 |
| cg00395625 | KIAA1549;KI/ | 7  | 0.01489797 | 0.16548335  | 0.330661597 |
| cg09510085 | KIAA1609     | 16 | 0.01131773 | 0.446979248 | 0.626486463 |
| cg04132007 | KIAA1688     | 8  | 0.00489511 | 0.693240599 | 0.821035145 |
| cg00661018 | KIAA1688     | 8  | 0.00464189 | 0.635318883 | 0.738592655 |
| cg06748934 | KIAA1712;KI/ | 4  | 0.00386732 | 0.812957929 | 0.929035527 |
| cg23977002 | KIDINS220    | 2  | 0.0001827  | 0.583992239 | 0.797056197 |
| cg26426395 | KIDINS220    | 2  | 0.01522284 | 0.181304648 | 0.369232215 |
| cg09888753 | KIF13B       | 8  | 0.00078117 | 0.511464784 | 0.698724603 |
| cg19888654 | KIF13B       | 8  | 0.0001566  | 0.366445491 | 0.529444721 |
| cg16821252 | KIF13B       | 8  | 0.00010151 | 0.809398055 | 0.912381039 |
| cg17876641 | KIF21B       | 1  | 0.00011205 | 0.495229807 | 0.631866808 |
| cg24246628 | KIF25;KIF25  | 6  | 0.04439156 | 0.132941284 | 0.259312601 |
| cg04257913 | KIF26A       | 14 | 0.01762984 | 0.431646394 | 0.575071239 |
| cg25011809 | KIF3A        | 5  | 0.03197888 | 0.600278209 | 0.701048465 |
| cg23186534 | KIF5A        | 12 | 0.04960736 | 0.475567221 | 0.603707481 |

|            |               |    |            |             |             |
|------------|---------------|----|------------|-------------|-------------|
| cg02161701 | KIF7          | 15 | 0.00637775 | 0.498619095 | 0.673108769 |
| cg11597157 | KIF7          | 15 | 0.00074287 | 0.60207183  | 0.740960906 |
| cg00917156 | KIFC3;KIFC3;l | 16 | 0.01166754 | 0.291816498 | 0.433481275 |
| cg04445570 | KIRREL3;KIRF  | 11 | 0.01008628 | 0.589981976 | 0.714785351 |
| cg21880903 | KLB           | 4  | 0.01449654 | 0.459646308 | 0.591920509 |
| cg07140250 | KLC1;KLC1;KI  | 14 | 0.02483505 | 0.454334233 | 0.580849855 |
| cg05647197 | KLF11         | 2  | 0.01309423 | 0.343943244 | 0.476754157 |
| cg00540067 | KLF15         | 3  | 0.02164437 | 0.185760323 | 0.290641201 |
| cg02668248 | KLF2          | 19 | 0.00029859 | 0.214021296 | 0.377458278 |
| cg12251895 | KLF7          | 2  | 0.02082424 | 0.287547452 | 0.435433443 |
| cg05214708 | KLF7          | 2  | 0.00795469 | 0.670072332 | 0.798115235 |
| cg01304993 | KLHDC4        | 16 | 0.03876849 | 0.48896973  | 0.604745983 |
| cg05830220 | KLHDC4        | 16 | 0.0322574  | 0.195885997 | 0.307782409 |
| cg09821701 | KLHDC4        | 16 | 0.00863354 | 0.163689683 | 0.272310298 |
| cg08356614 | KLHDC5        | 12 | 0.00213281 | 0.343782322 | 0.477452474 |
| cg22249529 | KLHDC7B       | 22 | 0.00247828 | 0.15938029  | 0.294461361 |
| cg07600533 | KLHDC7B       | 22 | 0.00612278 | 0.132532765 | 0.24146033  |
| cg09502111 | KLHDC8A       | 1  | 0.00016006 | 0.582081667 | 0.74967489  |
| cg00058923 | KLHDC9;KLHI   | 1  | 0.00117522 | 0.486691266 | 0.646819235 |
| cg04359978 | KLHL17        | 1  | 0.00399585 | 0.234658038 | 0.352451332 |
| cg26635367 | KLHL2;KLHL2   | 4  | 0.00061887 | 0.199891745 | 0.426253743 |
| cg15392471 | KLHL21        | 1  | 0.00981589 | 0.488747735 | 0.64490175  |
| cg01120851 | KLHL21        | 1  | 0.00216772 | 0.725725645 | 0.838957876 |
| cg14823363 | KLHL21        | 1  | 0.00716697 | 0.339805649 | 0.440477712 |
| cg06371489 | KLHL25        | 15 | 0.00197009 | 0.506476469 | 0.634348392 |
| cg24215531 | KLHL26        | 19 | 0.00103822 | 0.277819801 | 0.382479211 |
| cg03445244 | KLHL29        | 2  | 0.00217268 | 0.317370219 | 0.534065624 |
| cg00854172 | KLHL29        | 2  | 0.0184521  | 0.130469648 | 0.327489134 |
| cg17952075 | KLHL29        | 2  | 0.01512757 | 0.15048769  | 0.318788147 |
| cg00746446 | KLHL29        | 2  | 0.00302187 | 0.529883978 | 0.697481691 |
| cg14551881 | KLHL29        | 2  | 0.00230751 | 0.219304304 | 0.357077402 |
| cg06676049 | KLHL29        | 2  | 0.00532467 | 0.265137212 | 0.396879945 |
| cg27297315 | KLHL29        | 2  | 0.02806206 | 0.39857055  | 0.517460579 |
| cg17245125 | KLHL29        | 2  | 0.00134668 | 0.297980906 | 0.403087611 |
| cg10982443 | KLHL33        | 14 | 0.00194084 | 0.158759572 | 0.320681825 |
| cg19635505 | KLHL33        | 14 | 0.00019707 | 0.224627295 | 0.357802687 |
| cg08482274 | KLHL36        | 16 | 0.04025036 | 0.520142862 | 0.636509137 |
| cg13388253 | KLK8;KLK8;KI  | 19 | 0.01746779 | 0.508281532 | 0.630032307 |
| cg03404742 | KLKBL4;CCDC   | 16 | 0.01433822 | 0.324763598 | 0.484906939 |
| cg15241779 | KLRD1;KLRD1   | 12 | 0.00536006 | 0.600532032 | 0.759040533 |
| cg01940139 | KLRD1;KLRD1   | 12 | 0.00244384 | 0.309748602 | 0.536518223 |
| cg21474838 | KLRD1;KLRD1   | 12 | 0.04566893 | 0.574795889 | 0.680870426 |
| cg04468334 | KRBA1         | 7  | 0.00036622 | 0.473478171 | 0.612498365 |
| cg14069619 | KRBA2         | 17 | 0.00529535 | 0.496056035 | 0.65066948  |
| cg21877960 | KRR1          | 12 | 0.00958952 | 0.719781495 | 0.845364565 |
| cg21336116 | KRT23;KRT23   | 17 | 0.00755775 | 0.163014386 | 0.35526549  |



|            |             |    |            |             |             |
|------------|-------------|----|------------|-------------|-------------|
| cg24340657 | KRT24       | 17 | 0.00492393 | 0.313848753 | 0.423249654 |
| cg05138546 | KRT36       | 17 | 0.04486402 | 0.542749941 | 0.766753781 |
| cg15136129 | KRT36       | 17 | 0.03392751 | 0.469999181 | 0.614796322 |
| cg07658640 | KRT6C       | 12 | 0.03375516 | 0.680095544 | 0.799717706 |
| cg05762338 | KRTAP1-5    | 17 | 0.00088612 | 0.359516359 | 0.565352868 |
| cg20960642 | KRTAP17-1   | 17 | 0.00119868 | 0.15694772  | 0.257709789 |
| cg15322542 | KRTAP17-1;K | 17 | 0.00684051 | 0.21383914  | 0.335026418 |
| cg12188197 | KRTAP2-4;KR | 17 | 0.03534856 | 0.330898384 | 0.463607263 |
| cg20102877 | KRTCAP3;KR  | 2  | 0.00053405 | 0.315935606 | 0.457180852 |
| cg17158414 | KRTCAP3;KR  | 2  | 0.00846539 | 0.332966734 | 0.459425549 |
| cg02592271 | KRTCAP3;KR  | 2  | 0.00238043 | 0.317460244 | 0.428736739 |
| cg21248554 | KRTCAP3;KR  | 2  | 0.02293103 | 0.209641565 | 0.310738446 |
| cg18428193 | KRTCAP3;NR  | 2  | 0.00401483 | 0.298986641 | 0.404379402 |
| cg10191002 | LAG3        | 12 | 0.00825129 | 0.226901753 | 0.348808605 |
| cg19421125 | LAG3        | 12 | 0.00441943 | 0.116114015 | 0.229560315 |
| cg08844365 | LAMA4;LAMI  | 6  | 0.00904327 | 0.1519213   | 0.282959985 |
| cg12382846 | LAMA5       | 20 | 0.00042947 | 0.474098786 | 0.62452193  |
| cg21170029 | LAMB3;LAMI  | 1  | 0.00103851 | 0.32480529  | 0.439497291 |
| cg12141218 | LAMB3;LAMI  | 1  | 0.00987996 | 0.214082997 | 0.319424419 |
| cg14475554 | LAMB3;LAMI  | 1  | 0.00106344 | 0.393752264 | 0.494843613 |
| cg13689073 | LARP1       | 5  | 0.00773384 | 0.136310802 | 0.319373048 |
| cg02639667 | LARP1       | 5  | 0.00030928 | 0.313653251 | 0.494251622 |
| cg16645907 | LARP1       | 5  | 0.00089065 | 0.188430056 | 0.318329683 |
| cg03519907 | LARP1       | 5  | 0.01632893 | 0.158606469 | 0.274854909 |
| cg23613317 | LARP1       | 5  | 0.01050516 | 0.130665597 | 0.24616509  |
| cg18467841 | LARP1B      | 4  | 0.00170337 | 0.748505749 | 0.878510428 |
| cg05380759 | LARS2       | 3  | 0.01177959 | 0.160078247 | 0.280951675 |
| cg01716603 | LASP1       | 17 | 0.00375537 | 0.301318733 | 0.460786307 |
| cg27053177 | LASS6       | 2  | 0.0023188  | 0.219898895 | 0.51123683  |
| cg26803993 | LASS6       | 2  | 0.00391989 | 0.577360459 | 0.722693462 |
| cg24522085 | LASS6       | 2  | 0.00903746 | 0.585022941 | 0.711766459 |
| cg09045552 | LASS6       | 2  | 0.00025542 | 0.701865049 | 0.80740322  |
| cg27409974 | LATS1       | 6  | 0.00083715 | 0.439229275 | 0.600777299 |
| cg26525870 | LAYN        | 11 | 0.00124871 | 0.471379718 | 0.648491098 |
| cg13754355 | LCN10       | 9  | 0.00222195 | 0.266372294 | 0.381313489 |
| cg09583302 | LDHA;LDHA;I | 11 | 0.0324737  | 0.208972468 | 0.504499959 |
| cg26362257 | LDHB        | 12 | 0.01475387 | 0.764632088 | 0.884028026 |
| cg26597485 | LDLRAD3     | 11 | 0.00577824 | 0.154662676 | 0.374588894 |
| cg15108490 | LDLRAD3     | 11 | 0.01987144 | 0.209363606 | 0.354844655 |
| cg16943934 | LDLRAD3     | 11 | 0.02205743 | 0.400276846 | 0.542118714 |
| cg06359931 | LDLRAP1     | 1  | 0.00615099 | 0.320834357 | 0.486753562 |
| cg25209353 | LDLRAP1     | 1  | 0.02699315 | 0.155662766 | 0.27333832  |
| cg24553728 | LDLRAP1     | 1  | 0.01823019 | 0.75706152  | 0.857265573 |
| cg12565679 | LECT2       | 5  | 0.01725968 | 0.246443803 | 0.451156556 |
| cg10774440 | LEFTY1      | 1  | 0.00615224 | 0.606864679 | 0.727931561 |
| cg16201661 | LEKR1       | 3  | 0.01475782 | 0.578039084 | 0.693400055 |

|            |               |    |            |             |             |
|------------|---------------|----|------------|-------------|-------------|
| cg08002765 | LEMD3;LEMI    | 12 | 0.03476348 | 0.545788052 | 0.685629338 |
| cg19594666 | LEP           | 7  | 4.07E-05   | 0.140671443 | 0.240887043 |
| cg03607891 | LEPR;LEPR     | 1  | 0.0332317  | 0.394235795 | 0.505044823 |
| cg16500874 | LETM1         | 4  | 0.00100718 | 0.501356499 | 0.673520092 |
| cg17104738 | LETM1         | 4  | 0.00401483 | 0.494593962 | 0.65929884  |
| cg23488055 | LETM1         | 4  | 0.02389442 | 0.517710444 | 0.672975584 |
| cg16964946 | LGR4          | 11 | 0.04258264 | 0.352428082 | 0.518562776 |
| cg08824221 | LGR4          | 11 | 0.00592099 | 0.163139465 | 0.323187497 |
| cg21170346 | LGR4          | 11 | 0.01823019 | 0.786569122 | 0.89825599  |
| cg23586835 | LGR4          | 11 | 0.01909896 | 0.68981088  | 0.795431182 |
| cg17995557 | LHPP;LHPP     | 10 | 0.00186393 | 0.18693811  | 0.462927869 |
| cg26284388 | LHPP;LHPP     | 10 | 0.01628553 | 0.327939681 | 0.531688983 |
| cg09690597 | LHPP;LHPP     | 10 | 0.00040028 | 0.178668424 | 0.343533253 |
| cg03499943 | LHPP;LHPP     | 10 | 0.00054925 | 0.394995961 | 0.556179415 |
| cg04949429 | LHPP;LHPP     | 10 | 0.02919799 | 0.26149919  | 0.412044074 |
| cg18593374 | LHPP;LHPP     | 10 | 0.0023101  | 0.243837059 | 0.390187422 |
| cg21390852 | LHPP;LHPP     | 10 | 0.0020735  | 0.190420777 | 0.309710554 |
| cg14496753 | LHX6;LHX6     | 9  | 0.00040104 | 0.217158459 | 0.380536651 |
| cg13571460 | LHX6;LHX6     | 9  | 0.00116473 | 0.158016215 | 0.299921935 |
| cg14476745 | LHX6;LHX6     | 9  | 0.00513514 | 0.22576265  | 0.361185415 |
| cg21573745 | LIG1          | 19 | 0.03399524 | 0.757097805 | 0.869056449 |
| cg21306988 | LIG4;LIG4;LIC | 13 | 0.04236468 | 0.155452945 | 0.271872386 |
| cg01578293 | LIMCH1;LIMC   | 4  | 0.00986921 | 0.570135115 | 0.703509314 |
| cg23291145 | LIMCH1;LIMC   | 4  | 0.00032132 | 0.266757246 | 0.455455553 |
| cg23825522 | LIMD1         | 3  | 0.00354317 | 0.115944146 | 0.343612254 |
| cg00225067 | LIMD1         | 3  | 0.04820092 | 0.142167538 | 0.310995596 |
| cg01942372 | LIMS1         | 2  | 0.04211291 | 0.499499348 | 0.642884085 |
| cg23528975 | LIMS2;GPR17   | 2  | 0.00481491 | 0.647503256 | 0.780191325 |
| cg19724910 | LIMS2;GPR17   | 2  | 0.00542774 | 0.533811273 | 0.636001666 |
| cg18044111 | LIMS2;LIMS2   | 2  | 0.00079581 | 0.280591701 | 0.405762564 |
| cg21869609 | LINGO3        | 19 | 0.00067845 | 0.212454522 | 0.374575295 |
| cg09370594 | LINGO3        | 19 | 0.00041553 | 0.365042582 | 0.485522341 |
| cg09610311 | LIPC          | 15 | 0.00289205 | 0.347606094 | 0.494770272 |
| cg01891736 | LITAF;LITAF;L | 16 | 0.04313496 | 0.294196307 | 0.422059472 |
| cg18380917 | LIX1L         | 1  | 0.04535636 | 0.579566542 | 0.696574339 |
| cg06461408 | LLGL2;LLGL2   | 17 | 0.02834175 | 0.469367168 | 0.594334341 |
| cg26289155 | LLGL2;LLGL2;  | 17 | 0.00267041 | 0.531925819 | 0.677937795 |
| cg08972916 | LLGL2;LLGL2;  | 17 | 0.02074462 | 0.400116606 | 0.536280502 |
| cg17029237 | LLGL2;LLGL2;  | 17 | 0.00061997 | 0.162484596 | 0.270398129 |
| cg05584737 | LMAN1         | 18 | 0.04608023 | 0.716294305 | 0.822904395 |
| cg09013267 | LMAN2         | 5  | 0.00071142 | 0.497642914 | 0.621889612 |
| cg16515546 | LMF1          | 16 | 0.00050349 | 0.456148734 | 0.637486796 |
| cg09091185 | LMF1          | 16 | 0.0031744  | 0.290112558 | 0.463709569 |
| cg04653025 | LMF1          | 16 | 0.02930182 | 0.639769936 | 0.786776187 |
| cg10244976 | LMF1          | 16 | 0.00105217 | 0.211171823 | 0.351855021 |
| cg00849267 | LMF1          | 16 | 0.0022722  | 0.282632867 | 0.422370715 |

|            |            |    |            |             |             |
|------------|------------|----|------------|-------------|-------------|
| cg05053735 | LMF1       | 16 | 0.00799248 | 0.166229517 | 0.289938147 |
| cg01707127 | LMF1       | 16 | 0.00696945 | 0.182909033 | 0.304588646 |
| cg03595018 | LMF1       | 16 | 0.00017486 | 0.390549674 | 0.500561831 |
| cg06683487 | LMF1       | 16 | 0.01656116 | 0.2294191   | 0.331796356 |
| cg05578056 | LMF1       | 16 | 0.00745289 | 0.325817547 | 0.426223951 |
| cg18147048 | LMNB2;TIMM | 19 | 0.01129711 | 0.2192489   | 0.361961062 |
| cg17408637 | LMO2;LMO2  | 11 | 0.030941   | 0.306237813 | 0.432751195 |
| cg11831419 | LMO7;LMO7  | 13 | 0.02594774 | 0.367093134 | 0.537835272 |
| cg13060233 | LMO7;LMO7  | 13 | 0.03208637 | 0.653620953 | 0.771302619 |
| cg06529818 | LOC1001280 | 1  | 0.00594043 | 0.209358504 | 0.360835559 |
| cg13655615 | LOC1001290 | 9  | 0.01837514 | 0.670850231 | 0.777931693 |
| cg00808403 | LOC1001293 | 3  | 0.02045189 | 0.469433445 | 0.571473991 |
| cg06908618 | LOC1001296 | 16 | 0.00121155 | 0.285109808 | 0.493211457 |
| cg01624637 | LOC1001296 | 16 | 0.00158707 | 0.464607219 | 0.630981704 |
| cg03579904 | LOC1001296 | 16 | 0.00597188 | 0.580232673 | 0.690297563 |
| cg25322596 | LOC1001300 | 1  | 0.00063477 | 0.633286687 | 0.733953391 |
| cg03059126 | LOC1001303 | 1  | 0.00522569 | 0.42605753  | 0.622951073 |
| cg02694925 | LOC1001305 | 18 | 0.00617585 | 0.344038211 | 0.589437336 |
| cg21671248 | LOC1001307 | 12 | 0.01855298 | 0.264873329 | 0.382162204 |
| cg14466863 | LOC1001308 | 4  | 0.00023576 | 0.284379092 | 0.408836908 |
| cg14505741 | LOC1001308 | 4  | 0.00425981 | 0.284273569 | 0.413650593 |
| cg26130533 | LOC1001308 | 4  | 0.0273584  | 0.37418728  | 0.498093696 |
| cg21987921 | LOC1001308 | 4  | 0.00016884 | 0.513164975 | 0.672667071 |
| cg15986469 | LOC1001308 | 4  | 0.01156848 | 0.138241396 | 0.276110275 |
| cg18085660 | LOC1001308 | 4  | 0.03308992 | 0.258621781 | 0.377513532 |
| cg09865015 | LOC1001308 | 4  | 0.01209214 | 0.41997136  | 0.533553206 |
| cg07686392 | LOC1001308 | 4  | 0.00417963 | 0.600433744 | 0.700624333 |
| cg04859117 | LOC1001335 | 11 | 0.00051123 | 0.373741843 | 0.592662896 |
| cg09248429 | LOC1001335 | 11 | 0.0006999  | 0.204963973 | 0.383557392 |
| cg18716210 | LOC1001335 | 11 | 0.00266459 | 0.169918858 | 0.29065717  |
| cg20494635 | LOC1001335 | 11 | 0.0008433  | 0.181073711 | 0.293499539 |
| cg10276301 | LOC1001335 | 11 | 0.00387614 | 0.15893384  | 0.2634765   |
| cg24143374 | LOC1001336 | 1  | 0.00739603 | 0.379018864 | 0.506575704 |
| cg11983469 | LOC1001336 | 1  | 0.01955203 | 0.575623646 | 0.677424982 |
| cg04517258 | LOC1001336 | 8  | 0.00022274 | 0.206106878 | 0.417606608 |
| cg18034368 | LOC1001697 | 10 | 0.00861111 | 0.50699794  | 0.70463805  |
| cg00273657 | LOC1001697 | 10 | 0.00263974 | 0.710981632 | 0.827401662 |
| cg03141090 | LOC1001697 | 10 | 0.00127444 | 0.748526675 | 0.860773436 |
| cg00526835 | LOC1001889 | 10 | 0.00571582 | 0.146837859 | 0.368837164 |
| cg23697796 | LOC1001889 | 10 | 0.03996044 | 0.096388912 | 0.213435765 |
| cg19192065 | LOC1001889 | 10 | 0.02869408 | 0.095697781 | 0.209536106 |
| cg18530107 | LOC1001889 | 10 | 0.0105633  | 0.328276581 | 0.429747904 |
| cg03184472 | LOC1002717 | 2  | 0.01010206 | 0.287250403 | 0.449821818 |
| cg08390901 | LOC1002872 | 2  | 0.00350021 | 0.56189753  | 0.708605067 |
| cg03846641 | LOC1002872 | 2  | 0.00107537 | 0.156018048 | 0.302186343 |
| cg25308803 | LOC1002872 | 2  | 0.00153318 | 0.192557446 | 0.338395513 |

|            |             |    |            |             |             |
|------------|-------------|----|------------|-------------|-------------|
| cg14892517 | LOC1003026  | 2  | 0.03172944 | 0.562717802 | 0.678818101 |
| cg08611810 | LOC1003026  | 2  | 8.27E-05   | 0.292978091 | 0.460046558 |
| cg13356253 | LOC1003026  | 2  | 0.00084167 | 0.339089643 | 0.495169153 |
| cg00701946 | LOC1003026  | 2  | 0.00017209 | 0.202630912 | 0.354640361 |
| cg12451530 | LOC1003026  | 2  | 0.00089986 | 0.273025597 | 0.422724287 |
| cg19878627 | LOC1003026  | 2  | 0.00177452 | 0.421986615 | 0.535984717 |
| cg05414908 | LOC1003026  | 2  | 0.00052769 | 0.421397591 | 0.534690543 |
| cg00735454 | LOC121838   | 13 | 0.00477065 | 0.215916547 | 0.438173868 |
| cg03826194 | LOC121838   | 13 | 0.02514714 | 0.244160349 | 0.446411462 |
| cg21247923 | LOC121952   | 13 | 0.00012554 | 0.601850773 | 0.793095607 |
| cg09887906 | LOC121952   | 13 | 0.00168845 | 0.33094947  | 0.511476921 |
| cg09287356 | LOC121952   | 13 | 0.00445291 | 0.437502587 | 0.592423801 |
| cg00009871 | LOC121952   | 13 | 0.00114637 | 0.437574172 | 0.580043792 |
| cg24427175 | LOC121952   | 13 | 0.00584864 | 0.521583025 | 0.626124265 |
| cg15996534 | LOC134466   | 5  | 0.00081625 | 0.228583903 | 0.340961879 |
| cg27053629 | LOC145474   | 14 | 0.02839655 | 0.568416288 | 0.708810111 |
| cg00610310 | LOC146336;S | 16 | 0.00119943 | 0.228088149 | 0.335656169 |
| cg22714290 | LOC148696   | 1  | 0.00306077 | 0.328934931 | 0.524799515 |
| cg22793142 | LOC148696   | 1  | 0.00145124 | 0.528316367 | 0.667212823 |
| cg19257274 | LOC148696   | 1  | 0.04777563 | 0.320816005 | 0.445091624 |
| cg20426361 | LOC150622   | 2  | 0.0013448  | 0.269247314 | 0.477063516 |
| cg04747036 | LOC150622   | 2  | 0.00175815 | 0.151005499 | 0.260456713 |
| cg08348461 | LOC151162   | 2  | 0.00290729 | 0.661021244 | 0.787215424 |
| cg03749915 | LOC154822   | 7  | 0.01154578 | 0.547500818 | 0.664575386 |
| cg07580867 | LOC283050;L | 10 | 0.00428935 | 0.381668528 | 0.545542827 |
| cg17028595 | LOC283050;L | 10 | 0.00403946 | 0.243893615 | 0.384407988 |
| cg04317051 | LOC283663   | 15 | 0.00632072 | 0.399542312 | 0.517065848 |
| cg01130056 | LOC283867   | 16 | 0.01319677 | 0.678932753 | 0.781970893 |
| cg25100722 | LOC284688   | 1  | 0.045332   | 0.151944227 | 0.271080591 |
| cg16431787 | LOC285768;L | 6  | 0.01379328 | 0.178558594 | 0.32939127  |
| cg24288715 | LOC285796   | 6  | 0.00095485 | 0.523986457 | 0.680755808 |
| cg18306983 | LOC285830;L | 6  | 0.02291884 | 0.46334546  | 0.567152135 |
| cg16415646 | LOC285954;L | 7  | 0.0013563  | 0.165212029 | 0.397471302 |
| cg02317313 | LOC338799   | 12 | 0.01271427 | 0.198110457 | 0.303335303 |
| cg20487548 | LOC339568   | 20 | 0.01213112 | 0.595208076 | 0.705937237 |
| cg13821227 | LOC339674   | 22 | 0.00936536 | 0.655825434 | 0.799979366 |
| cg06270545 | LOC390595   | 15 | 0.03002305 | 0.141899476 | 0.259019019 |
| cg01291474 | LOC390595   | 15 | 0.03526841 | 0.112155918 | 0.212704365 |
| cg06811361 | LOC399959;N | 11 | 0.00248704 | 0.453349738 | 0.73222386  |
| cg27518240 | LOC400804   | 1  | 0.04299707 | 0.122690256 | 0.2412819   |
| cg11538810 | LOC400931   | 22 | 0.00476497 | 0.229968388 | 0.335582884 |
| cg00927666 | LOC402644   | 7  | 0.00839451 | 0.186333329 | 0.391149158 |
| cg25548834 | LOC402644   | 7  | 0.03748623 | 0.472495486 | 0.609260363 |
| cg14286546 | LOC440173   | 9  | 0.0446706  | 0.602446466 | 0.754797387 |
| cg24235633 | LOC440356;L | 16 | 0.04694227 | 0.496910105 | 0.598224867 |
| cg00060374 | LOC441869;L | 1  | 0.00015412 | 0.221268487 | 0.372572134 |

|            |             |    |            |             |             |
|------------|-------------|----|------------|-------------|-------------|
| cg15633699 | LOC441869;L | 1  | 0.00011358 | 0.678627651 | 0.791990053 |
| cg18233411 | LOC552889;L | 12 | 0.03694025 | 0.583593273 | 0.69457991  |
| cg02536995 | LOC553137   | 6  | 0.00339914 | 0.224375231 | 0.388010294 |
| cg00600617 | LOC553137   | 6  | 0.01054342 | 0.106729318 | 0.223065227 |
| cg00842231 | LOC55908;D  | 19 | 0.00466373 | 0.578935845 | 0.690705119 |
| cg04946709 | LOC644649   | 16 | 0.02051155 | 0.582038769 | 0.753498852 |
| cg20148389 | LOC646982;L | 13 | 0.00110317 | 0.518655405 | 0.71561777  |
| cg08569979 | LOC646982;L | 13 | 0.00083967 | 0.411033492 | 0.596374944 |
| cg13750802 | LOC646982;L | 13 | 0.00375262 | 0.412361523 | 0.594268688 |
| cg11510891 | LOC646982;L | 13 | 0.00117894 | 0.231082751 | 0.371085711 |
| cg13159985 | LOC646982;L | 13 | 6.34E-05   | 0.746823088 | 0.863166495 |
| cg10945881 | LOC650623   | 10 | 0.02327723 | 0.758214649 | 0.870381814 |
| cg16314851 | LOC723809   | 7  | 0.0015965  | 0.327711202 | 0.562541681 |
| cg18055067 | LOC728264   | 5  | 0.03518694 | 0.515156088 | 0.61888553  |
| cg15954353 | LOC728392   | 17 | 0.00371521 | 0.138793187 | 0.282744105 |
| cg09205190 | LOC728392;L | 17 | 0.00318196 | 0.181484555 | 0.349286185 |
| cg26476173 | LONP2       | 16 | 0.04267182 | 0.229098588 | 0.364022845 |
| cg09916599 | LOXL1       | 15 | 0.00015308 | 0.481286799 | 0.659560752 |
| cg06768079 | LOXL2       | 8  | 5.80E-05   | 0.427792259 | 0.666072401 |
| cg04259752 | LOXL2       | 8  | 0.00033097 | 0.221736356 | 0.350702104 |
| cg00326251 | LOXL2       | 8  | 0.00204948 | 0.343278547 | 0.461842468 |
| cg14231369 | LPAR1;LPAR1 | 9  | 0.00791582 | 0.675057705 | 0.78834958  |
| cg21422605 | LPAR3       | 1  | 0.00166148 | 0.374278754 | 0.522593658 |
| cg00281273 | LPCAT1      | 5  | 0.00341935 | 0.240793968 | 0.382309951 |
| cg00857851 | LPCAT1      | 5  | 0.00702195 | 0.508897873 | 0.622289416 |
| cg20962974 | LPCAT1      | 5  | 0.0007631  | 0.554760112 | 0.666816665 |
| cg22193276 | LPIN1       | 2  | 0.00684642 | 0.550629278 | 0.652721249 |
| cg15052335 | LPIN2;LPIN2 | 18 | 0.04674998 | 0.39106597  | 0.527525431 |
| cg08326019 | LPPR2;LPPR2 | 19 | 0.00240818 | 0.333941173 | 0.511548001 |
| cg22486630 | LPPR2;LPPR2 | 19 | 0.00524911 | 0.476524242 | 0.630578716 |
| cg18365406 | LPPR2;LPPR2 | 19 | 0.00760391 | 0.302512246 | 0.409950655 |
| cg24840300 | LPPR3       | 19 | 0.01299946 | 0.554905496 | 0.656729225 |
| cg03729251 | LRBA        | 4  | 0.00174397 | 0.185959217 | 0.346911071 |
| cg12035325 | LRBA        | 4  | 0.0111003  | 0.586611651 | 0.724529026 |
| cg02075410 | LRBA;MAB21  | 4  | 0.02187894 | 0.310340655 | 0.411303531 |
| cg17920789 | LRCH1;LRCH: | 13 | 0.00437567 | 0.202572494 | 0.417538125 |
| cg00002033 | LRFN1       | 19 | 0.00083008 | 0.257949059 | 0.399091928 |
| cg20608100 | LRFN1       | 19 | 0.00294047 | 0.309550512 | 0.435781231 |
| cg26910511 | LRFN1       | 19 | 0.00064895 | 0.321117568 | 0.446673352 |
| cg11198596 | LRIG1       | 3  | 0.00621626 | 0.145725197 | 0.309177482 |
| cg26053346 | LRIG1       | 3  | 0.02533514 | 0.244523039 | 0.401362072 |
| cg05543520 | LRIG1       | 3  | 0.01086989 | 0.148704588 | 0.28745366  |
| cg22459236 | LRIG3;LRIG3 | 12 | 0.00033097 | 0.455178208 | 0.699674363 |
| cg14621254 | LRP1        | 12 | 0.00039476 | 0.231532781 | 0.390678912 |
| cg06715885 | LRP1        | 12 | 0.00407264 | 0.680926023 | 0.794708726 |
| cg10815420 | LRP12;LRP12 | 8  | 0.01675828 | 0.370041933 | 0.493466813 |

|            |               |    |            |             |             |
|------------|---------------|----|------------|-------------|-------------|
| cg00603435 | LRP1B         | 2  | 0.00642243 | 0.231417529 | 0.361939098 |
| cg13738327 | LRP5          | 11 | 0.00129609 | 0.332848326 | 0.570890777 |
| cg16409259 | LRP5          | 11 | 0.00157159 | 0.290239864 | 0.495419149 |
| cg05754939 | LRP5          | 11 | 0.00012191 | 0.240888002 | 0.404257019 |
| cg25781963 | LRP5          | 11 | 0.01382589 | 0.420336855 | 0.574650561 |
| cg08648997 | LRP5          | 11 | 0.0330537  | 0.212240873 | 0.352404972 |
| cg12832726 | LRP5          | 11 | 0.00977973 | 0.157645803 | 0.260003771 |
| cg10028983 | LRP5          | 11 | 0.01277069 | 0.719612335 | 0.821129216 |
| cg11950754 | LRP8;LRP8;LF  | 1  | 0.0002921  | 0.296321953 | 0.54987906  |
| cg04483460 | LRP8;LRP8;LF  | 1  | 0.01960128 | 0.142869262 | 0.305148347 |
| cg19745317 | LRP8;LRP8;LF  | 1  | 0.01611774 | 0.530829977 | 0.652578543 |
| cg16429063 | LRP8;LRP8;LF  | 1  | 0.01156187 | 0.728327981 | 0.841054299 |
| cg20389822 | LRPAP1        | 4  | 0.00116242 | 0.491080568 | 0.611432423 |
| cg20437668 | LRPAP1        | 4  | 0.00119813 | 0.681623945 | 0.801684355 |
| cg16465012 | LRPAP1        | 4  | 0.00039987 | 0.614959937 | 0.734219412 |
| cg01239922 | LRR14B        | 5  | 0.00075438 | 0.180533084 | 0.305081799 |
| cg19091930 | LRR14B        | 5  | 0.00832419 | 0.349988642 | 0.458914169 |
| cg26692873 | LRR16A        | 6  | 0.00298084 | 0.557792488 | 0.716776904 |
| cg16875182 | LRR2;TDGF1    | 3  | 0.00221248 | 0.360106844 | 0.480872656 |
| cg10242476 | LRR2;TDGF1    | 3  | 0.04628018 | 0.295977637 | 0.398693615 |
| cg24602245 | LRR47         | 1  | 0.00651624 | 0.443675036 | 0.626195915 |
| cg12231584 | LRR47         | 1  | 0.04401351 | 0.340801612 | 0.454557188 |
| cg07566790 | LRR48;LRR48   | 17 | 0.01530789 | 0.28118447  | 0.426391535 |
| cg03153397 | LRR48;LRR48   | 17 | 0.04900507 | 0.369836215 | 0.495346031 |
| cg04823676 | LRR56         | 11 | 0.00137259 | 0.607516882 | 0.70763877  |
| cg21011621 | LRR59         | 17 | 0.00552274 | 0.375529118 | 0.491238592 |
| cg21681702 | LRR7          | 1  | 0.00260668 | 0.641402983 | 0.764881267 |
| cg21198455 | LRR8A;LRR8A   | 9  | 0.00011244 | 0.435729107 | 0.597271302 |
| cg14206615 | LRR8A;LRR8A   | 9  | 0.00158432 | 0.672875729 | 0.791318978 |
| cg09818397 | LRR8B;LRR8B   | 1  | 0.04474655 | 0.212216084 | 0.362733717 |
| cg17603219 | LRR8D;LRR8D   | 1  | 0.02205213 | 0.322447099 | 0.501197408 |
| cg05578673 | LRR8D;LRR8D   | 1  | 0.01650656 | 0.093658348 | 0.199011281 |
| cg04550950 | LRR8D;LRR8D   | 1  | 0.00721619 | 0.154209831 | 0.255736358 |
| cg02524003 | LRR11;LRR11   | 8  | 0.00452623 | 0.737765747 | 0.888399013 |
| cg24305555 | LRR12;LRR12   | 3  | 0.00189278 | 0.549876572 | 0.747402822 |
| cg27373390 | LRR12;LRR12   | 3  | 0.0186822  | 0.265937653 | 0.441704212 |
| cg00211625 | LRR14         | 3  | 0.03189542 | 0.575515531 | 0.708104248 |
| cg07165120 | LRR1          | 15 | 0.02055077 | 0.289315799 | 0.478187766 |
| cg11408395 | LRR1          | 15 | 0.00011784 | 0.659139554 | 0.80898998  |
| cg15042142 | LRR1          | 15 | 0.00168264 | 0.669190545 | 0.779005179 |
| cg12664938 | LRR2          | 12 | 0.00217777 | 0.788753362 | 0.890935575 |
| cg27313674 | LRR4          | 20 | 0.00287931 | 0.386215192 | 0.537596217 |
| cg08963013 | LRR14         | 2  | 0.00628502 | 0.54236832  | 0.795437549 |
| cg11532513 | LRR1;CACN1    | 3  | 0.01602748 | 0.511991739 | 0.638763632 |
| cg23352483 | LSAMP         | 3  | 0.00907447 | 0.261753291 | 0.413495195 |
| cg03538814 | LRR14A;LRR14A | 19 | 0.01975689 | 0.36779079  | 0.490985503 |

|            |              |    |            |             |             |
|------------|--------------|----|------------|-------------|-------------|
| cg13197551 | LSM14B       | 20 | 0.00178692 | 0.317183194 | 0.448094189 |
| cg18088415 | LSM2         | 6  | 0.04141711 | 0.556061282 | 0.656386232 |
| cg09245582 | LSM4         | 19 | 0.00030197 | 0.407177142 | 0.651798134 |
| cg05409391 | LSP1         | 11 | 0.00557246 | 0.755717543 | 0.878491515 |
| cg05003723 | LSP1         | 11 | 0.0148688  | 0.695669852 | 0.801756363 |
| cg08687540 | LSP1;LSP1;LS | 11 | 0.00342359 | 0.121175768 | 0.24223215  |
| cg16903735 | LSP1;LSP1;LS | 11 | 0.00046123 | 0.185355267 | 0.335067713 |
| cg09956037 | LSP1;LSP1;LS | 11 | 0.00985154 | 0.306809922 | 0.451846979 |
| cg04650653 | LSP1;LSP1;LS | 11 | 0.00203741 | 0.149707375 | 0.283569218 |
| cg09989681 | LSP1;LSP1;LS | 11 | 0.00042464 | 0.272800904 | 0.392024695 |
| cg24552015 | LSP1;LSP1;LS | 11 | 0.00138801 | 0.303938078 | 0.417749192 |
| cg03483046 | LSP1;LSP1;LS | 11 | 0.03190669 | 0.188814319 | 0.294327737 |
| cg15079934 | LSP1;LSP1;LS | 11 | 0.00136587 | 0.299751013 | 0.446073619 |
| cg26897904 | LSP1;LSP1;LS | 11 | 0.00053366 | 0.204434572 | 0.337456    |
| cg07164388 | LTB4R2;LTB4  | 14 | 0.01455198 | 0.561157927 | 0.680580163 |
| cg18658787 | LTBP1;LTBP1  | 2  | 0.02003493 | 0.285807503 | 0.4379857   |
| cg27317046 | LTBP2        | 14 | 0.00168709 | 0.2056609   | 0.427442613 |
| cg25980489 | LTBP2        | 14 | 0.02499988 | 0.315460891 | 0.446194136 |
| cg24164786 | LTBP2        | 14 | 0.02196807 | 0.188341932 | 0.288541526 |
| cg23272978 | LTBP3;LTBP3  | 11 | 0.00575903 | 0.532116208 | 0.656490846 |
| cg07676093 | LTBP3;SCYL1  | 11 | 0.011311   | 0.29886496  | 0.402437732 |
| cg01564640 | LTBP4;LTBP4  | 19 | 0.00181442 | 0.316084736 | 0.481842108 |
| cg26504110 | LTBP4;LTBP4  | 19 | 0.00277881 | 0.136513038 | 0.299644423 |
| cg22046408 | LTBP4;LTBP4  | 19 | 0.03271682 | 0.129866942 | 0.253521587 |
| cg02637086 | LTBP4;LTBP4  | 19 | 7.57E-05   | 0.286968099 | 0.407385253 |
| cg21784305 | LUZP2        | 11 | 0.0323223  | 0.62010176  | 0.776516162 |
| cg22706992 | LVRN         | 5  | 0.00039095 | 0.324788715 | 0.544179496 |
| cg12130935 | LY6E;LOC100  | 8  | 0.01376109 | 0.107563292 | 0.212750461 |
| cg26877565 | LY6G6C       | 6  | 0.01572819 | 0.437118173 | 0.551566193 |
| cg08342194 | LY6G6E;LY6G  | 6  | 0.01516306 | 0.18604879  | 0.291339951 |
| cg18805892 | LY9;LY9      | 1  | 0.02484791 | 0.157714904 | 0.314020399 |
| cg12810626 | LY9;LY9      | 1  | 0.0302123  | 0.096539938 | 0.219735727 |
| cg23050079 | LY9;LY9      | 1  | 0.01781725 | 0.382702812 | 0.487077675 |
| cg08090164 | LYNX1;LYNX1  | 8  | 0.00526752 | 0.206801441 | 0.36749545  |
| cg19021188 | LYNX1;LYNX1  | 8  | 0.02254622 | 0.183920243 | 0.288117914 |
| cg11812233 | LYPD1;LYPD1  | 2  | 0.01985488 | 0.17723984  | 0.314153802 |
| cg24469412 | LYPD1;NCKAI  | 2  | 0.01577799 | 0.670688042 | 0.810089784 |
| cg19753174 | LYPLAL1      | 1  | 0.00033508 | 0.232581648 | 0.44285388  |
| cg26554494 | LYPLAL1      | 1  | 0.03730166 | 0.729867966 | 0.859856282 |
| cg10084509 | LYRM1;LYRM   | 16 | 0.0082955  | 0.77297853  | 0.87666504  |
| cg02357637 | LYSMD4       | 15 | 0.00070541 | 0.225536056 | 0.377336188 |
| cg06887283 | LYST         | 1  | 0.0022717  | 0.833918311 | 0.935596594 |
| cg14085715 | MACC1        | 7  | 0.01261636 | 0.362003948 | 0.556056719 |
| cg18647268 | MACF1        | 1  | 0.01810004 | 0.133524184 | 0.242239625 |
| cg04683210 | MACROD1      | 11 | 8.11E-05   | 0.382293352 | 0.637502274 |
| cg19324462 | MACROD1      | 11 | 0.00015136 | 0.405861439 | 0.604201395 |

|            |           |    |            |             |             |
|------------|-----------|----|------------|-------------|-------------|
| cg02374207 | MACROD1   | 11 | 0.00782656 | 0.164022474 | 0.314690841 |
| cg09705456 | MACROD1   | 11 | 0.00048607 | 0.590967898 | 0.738826194 |
| cg22011888 | MACROD1   | 11 | 0.00068439 | 0.441484771 | 0.58701983  |
| cg15769472 | MACROD1   | 11 | 0.00166866 | 0.169757742 | 0.291271907 |
| cg16519399 | MACROD1   | 11 | 0.00181882 | 0.137946208 | 0.250583255 |
| cg19285478 | MACROD1   | 11 | 0.00523031 | 0.304099613 | 0.404588668 |
| cg00749118 | MAD1L1;MA | 7  | 0.0017351  | 0.320927845 | 0.594657653 |
| cg02421172 | MAD1L1;MA | 7  | 0.00483829 | 0.2008941   | 0.425923796 |
| cg10534659 | MAD1L1;MA | 7  | 0.00706536 | 0.163310468 | 0.380135328 |
| cg05985070 | MAD1L1;MA | 7  | 0.00124465 | 0.225155323 | 0.437607662 |
| cg16222367 | MAD1L1;MA | 7  | 0.0003561  | 0.396753109 | 0.604737145 |
| cg22963979 | MAD1L1;MA | 7  | 0.00412738 | 0.24564823  | 0.450496219 |
| cg11852646 | MAD1L1;MA | 7  | 0.00022274 | 0.4905257   | 0.661928263 |
| cg05434287 | MAD1L1;MA | 7  | 0.01660492 | 0.471305691 | 0.627959166 |
| cg04596071 | MAD1L1;MA | 7  | 8.60E-05   | 0.27139774  | 0.418784738 |
| cg21004924 | MAD1L1;MA | 7  | 0.01805312 | 0.534243774 | 0.673259587 |
| cg06624731 | MAD1L1;MA | 7  | 0.02772245 | 0.368496967 | 0.507438874 |
| cg05533001 | MAD1L1;MA | 7  | 0.00048673 | 0.414178926 | 0.552631775 |
| cg17103856 | MAD1L1;MA | 7  | 0.04870245 | 0.524896169 | 0.66248862  |
| cg08712631 | MAD1L1;MA | 7  | 0.00314371 | 0.622871019 | 0.750726036 |
| cg20459911 | MAD1L1;MA | 7  | 0.00033557 | 0.525004018 | 0.652620878 |
| cg18319104 | MAD1L1;MA | 7  | 0.0024427  | 0.626429709 | 0.750281133 |
| cg00860321 | MAD1L1;MA | 7  | 0.00229611 | 0.244589433 | 0.365632048 |
| cg24295561 | MAD1L1;MA | 7  | 0.0205315  | 0.437101894 | 0.555193499 |
| cg09075743 | MAD1L1;MA | 7  | 0.02094143 | 0.497014221 | 0.613440262 |
| cg09118048 | MAD1L1;MA | 7  | 0.00245144 | 0.201391655 | 0.316583926 |
| cg07556911 | MAD1L1;MA | 7  | 0.03301683 | 0.526301593 | 0.640126019 |
| cg07167778 | MAD1L1;MA | 7  | 0.00921941 | 0.413178631 | 0.526062028 |
| cg17551891 | MAD1L1;MA | 7  | 0.0119762  | 0.694531758 | 0.806055646 |
| cg17498476 | MAD1L1;MA | 7  | 0.00274369 | 0.18513905  | 0.295714966 |
| cg06994282 | MAD1L1;MA | 7  | 0.00105816 | 0.70141016  | 0.809954533 |
| cg27238358 | MAD1L1;MA | 7  | 0.00397035 | 0.606241807 | 0.713075917 |
| cg15225688 | MAD1L1;MA | 7  | 0.03248888 | 0.229304412 | 0.33597673  |
| cg27212520 | MAD1L1;MA | 7  | 0.00176495 | 0.47932744  | 0.585197146 |
| cg12964697 | MAD1L1;MA | 7  | 0.00046135 | 0.631610481 | 0.734421481 |
| cg03043709 | MAD1L1;MA | 7  | 0.0007719  | 0.752954684 | 0.853408729 |
| cg04863758 | MAEA;MAEA | 4  | 0.00321628 | 0.163935637 | 0.287488339 |
| cg11571453 | MAEA;MAEA | 4  | 0.02751787 | 0.682455272 | 0.790318142 |
| cg03207121 | MAFK      | 7  | 0.01837033 | 0.318142905 | 0.439248694 |
| cg04014889 | MAGEL2    | 15 | 0.00405065 | 0.62401079  | 0.756867462 |
| cg00650672 | MAGI1;MAG | 3  | 0.03945067 | 0.447469604 | 0.564839957 |
| cg03127558 | MAMSTR    | 19 | 0.00854763 | 0.480357113 | 0.622756451 |
| cg10404009 | MAMSTR;RA | 19 | 0.00753156 | 0.130064143 | 0.254474077 |
| cg24661274 | MAP1B     | 5  | 0.00226025 | 0.436436911 | 0.629557679 |
| cg11330139 | MAP1S     | 19 | 0.01543312 | 0.340035126 | 0.456405404 |
| cg04589021 | MAP2K3;MA | 17 | 0.00014702 | 0.207220978 | 0.404649346 |



|            |            |    |            |             |             |
|------------|------------|----|------------|-------------|-------------|
| cg06076794 | MAP2K3;MA  | 17 | 0.00576425 | 0.606091957 | 0.717417068 |
| cg26779305 | MAP2K4;MIF | 17 | 0.00493799 | 0.179379837 | 0.367096182 |
| cg26333219 | MAP2K5;MA  | 15 | 0.00120205 | 0.663884966 | 0.79089445  |
| cg23696864 | MAP2K6     | 17 | 0.00932953 | 0.297063279 | 0.44470561  |
| cg04798016 | MAP3K11    | 11 | 0.00144184 | 0.30629516  | 0.466780517 |
| cg01180479 | MAP3K11    | 11 | 0.00050977 | 0.264455653 | 0.405534772 |
| cg19044229 | MAP3K11    | 11 | 0.00028774 | 0.332437738 | 0.454612774 |
| cg19811337 | MAP3K11    | 11 | 0.00888326 | 0.144423035 | 0.244559592 |
| cg25138713 | MAP3K4;MA  | 6  | 0.00617874 | 0.502857305 | 0.65635192  |
| cg26038649 | MAP3K6     | 1  | 0.00010233 | 0.268278542 | 0.410988913 |
| cg11705208 | MAP3K6     | 1  | 0.00014848 | 0.402239561 | 0.50622292  |
| cg02634454 | MAP4;MAP4  | 3  | 0.00548564 | 0.524315806 | 0.64454744  |
| cg04388901 | MAP4;MAP4  | 3  | 0.01564889 | 0.558493061 | 0.706563014 |
| cg18633587 | MAP4;MAP4  | 3  | 0.03717305 | 0.585920411 | 0.690760738 |
| cg00857862 | MAP4;MAP4  | 3  | 0.00501281 | 0.190439275 | 0.327589783 |
| cg02798280 | MAP4K1;MA  | 19 | 0.00047393 | 0.324675405 | 0.457779158 |
| cg05258935 | MAP4K1;MA  | 19 | 0.00324432 | 0.137245953 | 0.255246234 |
| cg25934954 | MAP4K2     | 11 | 0.01277792 | 0.22874115  | 0.329961464 |
| cg18489755 | MAP6D1     | 3  | 0.04383202 | 0.190032575 | 0.330189886 |
| cg17452384 | MAPK10;MA  | 4  | 0.01171131 | 0.533904084 | 0.686312552 |
| cg22117438 | MAPK10;MA  | 4  | 0.00109101 | 0.698971817 | 0.835368556 |
| cg16054907 | MAPK11     | 22 | 0.00137324 | 0.223127933 | 0.353853412 |
| cg26033870 | MAPK14;MA  | 6  | 0.00899731 | 0.661589131 | 0.814693536 |
| cg02994291 | MAPK8IP3;M | 16 | 0.00167449 | 0.273281287 | 0.396488108 |
| cg07870479 | MAPK8IP3;M | 16 | 0.00303835 | 0.288248462 | 0.409252993 |
| cg26812585 | MAPKAPK2;M | 1  | 0.00142822 | 0.419312716 | 0.521491983 |
| cg04059696 | MAPRE3     | 2  | 0.00637775 | 0.351009835 | 0.459433476 |
| cg16963138 | MARCH10    | 17 | 0.00678283 | 0.437204799 | 0.573886957 |
| cg14622443 | MARCH10    | 17 | 0.02124436 | 0.370077113 | 0.489144563 |
| cg18640536 | MARCH3     | 5  | 0.00109064 | 0.219802998 | 0.42537716  |
| cg09034795 | MARK2;MAR  | 11 | 0.00040028 | 0.206163554 | 0.403554392 |
| cg06982473 | MARK2;MAR  | 11 | 0.00118022 | 0.253334338 | 0.40254608  |
| cg21609804 | MARK2;MAR  | 11 | 0.00174853 | 0.166373301 | 0.315561604 |
| cg10689689 | MARK2;MAR  | 11 | 0.00724983 | 0.174963926 | 0.303913269 |
| cg18140824 | MASP1;MASI | 3  | 0.00098232 | 0.357070624 | 0.585130594 |
| cg03726312 | MAST3      | 19 | 0.00030197 | 0.735561573 | 0.854034619 |
| cg17462107 | MAST4;MAS  | 5  | 0.00222031 | 0.216215103 | 0.393279364 |
| cg17461278 | MATN1      | 1  | 0.01084174 | 0.365445423 | 0.537195347 |
| cg04348183 | MATN1      | 1  | 0.00031857 | 0.577437344 | 0.741879491 |
| cg14183455 | MATN1      | 1  | 0.00078633 | 0.628390273 | 0.765928226 |
| cg24531825 | MATN1;MAT  | 1  | 0.00195659 | 0.52441875  | 0.65984766  |
| cg21745307 | MATN4;RBPJ | 20 | 0.00299046 | 0.450328575 | 0.636782308 |
| cg12429065 | MB         | 22 | 0.00295749 | 0.274476417 | 0.485048367 |
| cg02312594 | MBD3       | 19 | 0.02919783 | 0.523165365 | 0.676216595 |
| cg00524814 | MBL2       | 10 | 0.04699355 | 0.403894444 | 0.506956848 |
| cg11862665 | MBNL2;MBN  | 13 | 0.00019475 | 0.509539396 | 0.667470241 |

|            |            |    |            |             |             |
|------------|------------|----|------------|-------------|-------------|
| cg13895393 | MBNL2;MBN  | 13 | 0.02949224 | 0.134631493 | 0.272422947 |
| cg06155414 | MBNL2;MBN  | 13 | 0.04052836 | 0.464714777 | 0.599833537 |
| cg06784689 | MBNL2;MBN  | 13 | 0.02689177 | 0.633796801 | 0.755306452 |
| cg15683856 | MBNL2;MBN  | 13 | 0.02934338 | 0.548176241 | 0.660152099 |
| cg17266581 | MBP;MBP    | 18 | 0.00035435 | 0.173235926 | 0.342997372 |
| cg23470914 | MBP;MBP    | 18 | 0.00043188 | 0.606030876 | 0.748844777 |
| cg25743490 | MBP;MBP    | 18 | 0.00827513 | 0.389404098 | 0.509616677 |
| cg11466309 | MBTD1      | 17 | 0.02178846 | 0.666986152 | 0.799838567 |
| cg15676677 | MCC;MCC    | 5  | 0.04817671 | 0.112094072 | 0.251790584 |
| cg02481669 | MCCD1      | 6  | 0.00362218 | 0.437786706 | 0.586867906 |
| cg21609154 | MCF2L      | 13 | 0.00091008 | 0.297424942 | 0.429434553 |
| cg16277139 | MCF2L;MCF2 | 13 | 0.00331688 | 0.529974787 | 0.697420175 |
| cg16100355 | MCF2L;MCF2 | 13 | 0.03421872 | 0.344631161 | 0.493486847 |
| cg20732304 | MCF2L;MCF2 | 13 | 0.00649732 | 0.309367185 | 0.453938796 |
| cg25101225 | MCF2L;MCF2 | 13 | 0.02469246 | 0.311724624 | 0.412208991 |
| cg05502478 | MCF2L2     | 3  | 0.02649769 | 0.382233239 | 0.542719628 |
| cg06264060 | MCHR1      | 22 | 0.00184507 | 0.15656857  | 0.304650511 |
| cg24854681 | MCM7;MCM   | 7  | 0.00143752 | 0.330294756 | 0.438201851 |
| cg02621376 | MCOLN2     | 1  | 0.01752457 | 0.140467035 | 0.254240864 |
| cg09035995 | MCPH1      | 8  | 0.0170157  | 0.479625605 | 0.651176262 |
| cg19511748 | MCTP1;MCTI | 5  | 0.00051245 | 0.542580084 | 0.680104869 |
| cg14086013 | MDFI       | 6  | 0.0003561  | 0.276545    | 0.400957065 |
| cg13612207 | MDFI       | 6  | 0.00064198 | 0.247752943 | 0.36609641  |
| cg23671901 | MDFI       | 6  | 0.00119039 | 0.335764207 | 0.447835582 |
| cg14558568 | MDFI       | 6  | 0.00798031 | 0.223213692 | 0.330046209 |
| cg01550799 | MDFIC;MDFI | 7  | 0.00658284 | 0.201442334 | 0.314015008 |
| cg05918292 | MDGA2      | 14 | 0.00860385 | 0.572422712 | 0.683177254 |
| cg16701167 | ME1        | 6  | 0.02126461 | 0.228388857 | 0.368980412 |
| cg12328429 | ME3;ME3;MI | 11 | 0.00218276 | 0.478666553 | 0.653229996 |
| cg01384290 | MECOM      | 3  | 0.00287222 | 0.49583296  | 0.644303007 |
| cg01787382 | MECOM      | 3  | 0.04483627 | 0.330349569 | 0.474167369 |
| cg24474182 | MED12L;P2R | 3  | 0.00460554 | 0.742012459 | 0.862271957 |
| cg15877399 | MED13L     | 12 | 0.00742961 | 0.447875068 | 0.650513069 |
| cg01626895 | MED13L     | 12 | 0.03478071 | 0.597324347 | 0.73502356  |
| cg05133323 | MED13L     | 12 | 0.03098142 | 0.601877482 | 0.706865026 |
| cg24367761 | MED23;MED  | 6  | 0.00745969 | 0.774346452 | 0.8960738   |
| cg15412772 | MED24;MED  | 17 | 0.00081592 | 0.16938685  | 0.319439052 |
| cg17344932 | MED24;MED  | 17 | 0.01395396 | 0.240543073 | 0.38580006  |
| cg14300812 | MED27      | 9  | 0.01057537 | 0.737474926 | 0.845112714 |
| cg16126137 | MEG8       | 14 | 0.02581531 | 0.122377082 | 0.251070231 |
| cg26450275 | MEGF10     | 5  | 0.00063743 | 0.420923191 | 0.654133172 |
| cg22760690 | MEGF11     | 15 | 0.00103787 | 0.384651031 | 0.591587497 |
| cg12402129 | MEGF11     | 15 | 0.04390889 | 0.450663509 | 0.556599972 |
| cg06511312 | MEGF6      | 1  | 0.00028199 | 0.270348542 | 0.463280542 |
| cg27450668 | MEGF6      | 1  | 0.00035687 | 0.228289985 | 0.411156003 |
| cg20826162 | MEGF6      | 1  | 0.00370254 | 0.153299626 | 0.29512212  |

|            |             |    |            |             |             |
|------------|-------------|----|------------|-------------|-------------|
| cg05334053 | MEGF6       | 1  | 0.00406002 | 0.589188884 | 0.725339309 |
| cg18553657 | MEGF8       | 19 | 0.00115876 | 0.51389111  | 0.617615749 |
| cg06994420 | MEIS1       | 2  | 0.01866234 | 0.361635883 | 0.522539226 |
| cg01863674 | MEIS1       | 2  | 0.00641834 | 0.536408794 | 0.684659262 |
| cg21177426 | MEIS2;MEIS2 | 15 | 0.00313275 | 0.314246801 | 0.609569645 |
| cg25221496 | MEIS2;MEIS2 | 15 | 0.00429784 | 0.508397253 | 0.759586687 |
| cg19010490 | MEIS2;MEIS2 | 15 | 0.00296178 | 0.297086439 | 0.51800099  |
| cg04339553 | MEIS2;MEIS2 | 15 | 0.00967567 | 0.353604719 | 0.565297719 |
| cg02377544 | MEIS2;MEIS2 | 15 | 0.00599819 | 0.323300724 | 0.505575124 |
| cg26708220 | MEIS2;MEIS2 | 15 | 0.02884333 | 0.22618741  | 0.375562445 |
| cg25447144 | MEIS2;MEIS2 | 15 | 0.01443212 | 0.568216837 | 0.692102146 |
| cg23677243 | MEIS2;MEIS2 | 15 | 0.04693986 | 0.246037764 | 0.348250737 |
| cg26585007 | MERTK       | 2  | 0.00526678 | 0.571101144 | 0.722290966 |
| cg13831540 | MESTIT1;ME  | 7  | 0.00015801 | 0.228359063 | 0.41379844  |
| cg07829809 | METAP1      | 4  | 0.00684234 | 0.787297566 | 0.936022945 |
| cg03260530 | METRNL      | 17 | 0.00381787 | 0.309005707 | 0.48693215  |
| cg16002136 | METRNL      | 17 | 9.29E-05   | 0.603512916 | 0.770958966 |
| cg22846776 | METT10D     | 17 | 0.00144872 | 0.54794113  | 0.671863903 |
| cg02148547 | METT11D1;N  | 14 | 0.03996044 | 0.359770036 | 0.493076323 |
| cg16424082 | METTTL7A    | 12 | 0.01039368 | 0.150857678 | 0.318868647 |
| cg26396535 | MEX3A       | 1  | 0.02026709 | 0.551289741 | 0.689764619 |
| cg11717597 | MEX3A       | 1  | 0.00155823 | 0.240634368 | 0.37145147  |
| cg02895724 | MEX3C       | 18 | 0.0448393  | 0.618287057 | 0.741654805 |
| cg21304454 | MFAP2;MFAI  | 1  | 0.00297432 | 0.227230435 | 0.405649417 |
| cg12081372 | MFAP3L;MF/  | 4  | 0.03098552 | 0.155142766 | 0.30185767  |
| cg12618270 | MFHAS1      | 8  | 0.04581502 | 0.128783538 | 0.240364056 |
| cg00637433 | MFI2;MFI2   | 3  | 8.75E-05   | 0.462046905 | 0.724547543 |
| cg03784611 | MFI2;MFI2   | 3  | 0.0005626  | 0.311095448 | 0.469301085 |
| cg21856334 | MFI2;MFI2   | 3  | 0.00048329 | 0.378094236 | 0.515675738 |
| cg01627785 | MFI2;MFI2   | 3  | 0.01724144 | 0.366922156 | 0.483899246 |
| cg04498801 | MFSD10;MFS  | 4  | 0.01541982 | 0.50736705  | 0.64177124  |
| cg16924045 | MFSD6       | 2  | 0.00161922 | 0.235083001 | 0.480564595 |
| cg19391560 | MFSD6L      | 17 | 0.00063376 | 0.233474131 | 0.339702481 |
| cg11685316 | MFSD6L;MFS  | 17 | 0.00081592 | 0.161368134 | 0.320178403 |
| cg18432414 | MFSD6L;MFS  | 17 | 0.00094934 | 0.247630701 | 0.376617017 |
| cg02203711 | MGAT3       | 22 | 0.01552241 | 0.387587825 | 0.526463052 |
| cg25015733 | MGAT4A      | 2  | 0.02099255 | 0.597194386 | 0.704502038 |
| cg07382437 | MGC14436;N  | 12 | 0.03646663 | 0.497014243 | 0.610957796 |
| cg27225658 | MGC16275    | 17 | 0.00812057 | 0.525066241 | 0.638894278 |
| cg11842367 | MGC27382    | 1  | 0.0260371  | 0.149078351 | 0.284162433 |
| cg19569684 | MGC29506    | 5  | 0.00210225 | 0.42001493  | 0.568472808 |
| cg18297349 | MGC29506    | 5  | 0.01620828 | 0.42998891  | 0.545642035 |
| cg03751055 | MGMT        | 10 | 0.0317545  | 0.654602747 | 0.842784549 |
| cg13171643 | MGMT        | 10 | 0.00367824 | 0.349759521 | 0.529091865 |
| cg25974017 | MGMT        | 10 | 0.00420234 | 0.137866237 | 0.285913395 |
| cg08883995 | MGMT        | 10 | 0.03588673 | 0.293721079 | 0.438504631 |

|            |             |    |            |             |             |
|------------|-------------|----|------------|-------------|-------------|
| cg02750154 | MGMT        | 10 | 0.01234252 | 0.394020067 | 0.526689547 |
| cg25145165 | MGMT        | 10 | 0.00490262 | 0.435538148 | 0.556377198 |
| cg18502933 | MGMT        | 10 | 0.00901388 | 0.537204188 | 0.657832605 |
| cg10505257 | MGRN1;MGF   | 16 | 3.07E-05   | 0.224144892 | 0.479589947 |
| cg00736299 | MGRN1;MGF   | 16 | 3.33E-06   | 0.176710939 | 0.350866236 |
| cg07812289 | MGRN1;MGF   | 16 | 0.0005373  | 0.485544293 | 0.644205268 |
| cg08147187 | MGRN1;MGF   | 16 | 0.01128646 | 0.630829808 | 0.776182216 |
| cg27436118 | MGRN1;MGF   | 16 | 0.00037718 | 0.144380623 | 0.279289778 |
| cg01156249 | MGRN1;MGF   | 16 | 0.0130609  | 0.359589904 | 0.489245303 |
| cg02074956 | MGRN1;MGF   | 16 | 0.00026401 | 0.233029442 | 0.349220831 |
| cg04071866 | MGRN1;MGF   | 16 | 0.00838714 | 0.612799225 | 0.713781719 |
| cg00033551 | MGRN1;MGF   | 16 | 0.00060739 | 0.713386632 | 0.814356806 |
| cg17456675 | MIB2;MIB2;M | 1  | 0.00014853 | 0.407719415 | 0.568732977 |
| cg23080546 | MICA        | 6  | 0.00200414 | 0.212067498 | 0.39874159  |
| cg09210225 | MICA        | 6  | 0.00362218 | 0.499166088 | 0.646876631 |
| cg13139838 | MICA        | 6  | 0.00815883 | 0.622108403 | 0.741612632 |
| cg15242630 | MICAL3;MIC  | 22 | 0.04583332 | 0.13793047  | 0.284458784 |
| cg16519758 | MICAL3;MIC  | 22 | 0.01055574 | 0.655957874 | 0.759426989 |
| cg02492818 | MICALL2     | 7  | 0.00032077 | 0.450645594 | 0.68268347  |
| cg02759751 | MICALL2     | 7  | 0.00020698 | 0.54285161  | 0.743423199 |
| cg05242402 | MICALL2     | 7  | 9.83E-05   | 0.513772512 | 0.662867716 |
| cg11251690 | MICALL2     | 7  | 0.0005324  | 0.5313141   | 0.678199432 |
| cg22972565 | MICB        | 6  | 0.00300848 | 0.520402924 | 0.646066214 |
| cg08176140 | MIDN        | 19 | 0.03502467 | 0.697496377 | 0.83478871  |
| cg18151262 | MIDN        | 19 | 0.00099592 | 0.397628012 | 0.534404632 |
| cg07843568 | MIDN        | 19 | 0.00081347 | 0.307914458 | 0.420259156 |
| cg14773523 | MINA;MINA;  | 3  | 0.01591096 | 0.377465918 | 0.530579081 |
| cg22110517 | MINK1;MINK  | 17 | 0.00297432 | 0.340548258 | 0.478312786 |
| cg20330086 | MINK1;MINK  | 17 | 0.02657226 | 0.618815579 | 0.723778027 |
| cg17649671 | MINPP1      | 10 | 0.01405082 | 0.098688258 | 0.255920762 |
| cg23381224 | MINPP1      | 10 | 0.01999399 | 0.707173306 | 0.824231215 |
| cg18222371 | MIR101-1    | 1  | 0.00021343 | 0.620965755 | 0.739515476 |
| cg00699693 | MIR140;WW   | 16 | 0.00679454 | 0.235220753 | 0.432537023 |
| cg07281938 | MIR140;WW   | 16 | 0.0012115  | 0.294430675 | 0.489088867 |
| cg03417340 | MIR140;WW   | 16 | 0.01192179 | 0.143708858 | 0.310609649 |
| cg00158530 | MIR140;WW   | 16 | 0.00581404 | 0.114815285 | 0.281354713 |
| cg03848856 | MIR140;WW   | 16 | 0.00527678 | 0.130216484 | 0.283337062 |
| cg08209934 | MIR140;WW   | 16 | 0.01465992 | 0.14195134  | 0.270560125 |
| cg03549146 | MIR140;WW   | 16 | 0.00337009 | 0.172145886 | 0.290050765 |
| cg26514117 | MIR181D;MI  | 19 | 0.00057472 | 0.518880398 | 0.6748675   |
| cg10822545 | MIR181D;MI  | 19 | 0.01480995 | 0.572536832 | 0.691708925 |
| cg25214966 | MIR199A2;D  | 1  | 0.0089915  | 0.102324571 | 0.204244826 |
| cg22109930 | MIR200B     | 1  | 0.02732441 | 0.527872958 | 0.632533768 |
| cg26754262 | MIR2052     | 8  | 0.0406583  | 0.101315768 | 0.202248873 |
| cg11976164 | MIR2054     | 4  | 0.00047744 | 0.734269483 | 0.897369499 |
| cg08849095 | MIR23B;C9o  | 9  | 0.03093169 | 0.161149581 | 0.285577349 |

|            |             |    |            |             |             |
|------------|-------------|----|------------|-------------|-------------|
| cg02268620 | MIR24-1;C9o | 9  | 0.00012533 | 0.645433193 | 0.814901483 |
| cg23131909 | MIR26B;CTD' | 2  | 0.00325222 | 0.259888951 | 0.381227017 |
| cg15076217 | MIR29C      | 1  | 6.24E-05   | 0.521364772 | 0.667539851 |
| cg02875879 | MIR302A;MI  | 4  | 0.03032443 | 0.426588568 | 0.554979823 |
| cg04390865 | MIR320B1    | 1  | 0.03612465 | 0.163352449 | 0.314319085 |
| cg20632224 | MIR320B1    | 1  | 0.04850074 | 0.138697872 | 0.265850802 |
| cg00909706 | MIR34A      | 1  | 0.01653577 | 0.417742089 | 0.524485671 |
| cg10021238 | MIR367;LARF | 4  | 0.00203998 | 0.739915792 | 0.868836005 |
| cg10006887 | MIR377      | 14 | 0.0010416  | 0.245517978 | 0.379831628 |
| cg18163364 | MIR377      | 14 | 0.01089691 | 0.518300665 | 0.650487799 |
| cg11134801 | MIR377      | 14 | 0.01896662 | 0.300918433 | 0.431900897 |
| cg04522625 | MIR548A2    | 3  | 0.00166797 | 0.495252677 | 0.656402019 |
| cg18697991 | MIR548A2    | 3  | 0.03617884 | 0.173980988 | 0.30949065  |
| cg23036340 | MIR548H4;TI | 15 | 0.00155676 | 0.251706284 | 0.403221789 |
| cg09031823 | MIR575;SCD' | 4  | 0.0096298  | 0.203934571 | 0.349989112 |
| cg10500570 | MIR599;VPS1 | 8  | 0.03316444 | 0.745853578 | 0.872347436 |
| cg20206204 | MIR614      | 12 | 0.00652965 | 0.50122025  | 0.629048469 |
| cg05346831 | MIR614      | 12 | 0.04894458 | 0.440156656 | 0.544958691 |
| cg18156845 | MIR744;MAF  | 17 | 0.01743994 | 0.471033633 | 0.640616071 |
| cg26015115 | MIR758;MIR: | 14 | 0.00019359 | 0.67330382  | 0.79424121  |
| cg06549228 | MIR758;MIR: | 14 | 0.00244461 | 0.583854249 | 0.699875585 |
| cg22030962 | MIR874;KLHL | 5  | 0.00555911 | 0.42055389  | 0.600687472 |
| cg04063235 | MIRLET7A3;L | 22 | 0.00044198 | 0.442936662 | 0.570499692 |
| cg22121941 | MIRLET7A3;L | 22 | 0.00266436 | 0.401887592 | 0.508733765 |
| cg01113900 | MITF;MITF;M | 3  | 0.01405587 | 0.772596328 | 0.877606555 |
| cg17397438 | MKKS;MKKS   | 20 | 0.00779696 | 0.7498069   | 0.850461742 |
| cg00926267 | MKL1        | 22 | 0.00045743 | 0.363478939 | 0.530007287 |
| cg07723431 | MKNK2;MKN   | 19 | 0.00090107 | 0.341146223 | 0.508298089 |
| cg00434573 | MKNK2;MKN   | 19 | 0.00157385 | 0.308636242 | 0.424694914 |
| cg07746514 | MLEC        | 12 | 0.02766467 | 0.552006921 | 0.683959174 |
| cg07218487 | MLL2        | 12 | 0.00047626 | 0.647315789 | 0.756711507 |
| cg11872373 | MLL3        | 7  | 0.00043278 | 0.206168566 | 0.39041673  |
| cg01969558 | MLLT1       | 19 | 0.00318772 | 0.5855262   | 0.696036272 |
| cg22501243 | MLXIP       | 12 | 0.00397216 | 0.150403831 | 0.348134017 |
| cg04049508 | MMP2;MMP    | 16 | 0.00465827 | 0.395482228 | 0.51085505  |
| cg12651286 | MMP20       | 11 | 0.01231451 | 0.144539124 | 0.283113078 |
| cg07954108 | MMP21       | 10 | 0.00225432 | 0.694893756 | 0.829419104 |
| cg05053594 | MMP25       | 16 | 0.00177025 | 0.553168621 | 0.672051831 |
| cg14589810 | MMP28       | 17 | 0.04500625 | 0.431631827 | 0.540025425 |
| cg04790749 | MMP28;MM    | 17 | 0.02384035 | 0.261603908 | 0.415386986 |
| cg17145397 | MMP3        | 11 | 0.03524335 | 0.138169939 | 0.244007965 |
| cg00187327 | MN1         | 22 | 0.03135048 | 0.293005914 | 0.44155503  |
| cg15529551 | MNAT1       | 14 | 0.01623957 | 0.78798297  | 0.892163317 |
| cg25159927 | MON1A;MOI   | 3  | 0.03902842 | 0.409587127 | 0.516877799 |
| cg19515390 | MORG1;MOF   | 19 | 0.00054877 | 0.489061553 | 0.595372723 |
| cg08868601 | MORN1       | 1  | 0.00043819 | 0.398690301 | 0.592787911 |

|            |             |    |            |             |             |
|------------|-------------|----|------------|-------------|-------------|
| cg16600733 | MORN1       | 1  | 0.00079521 | 0.151541302 | 0.301825423 |
| cg18155888 | MORN1       | 1  | 0.00054493 | 0.218654696 | 0.367998908 |
| cg22708961 | MORN1       | 1  | 0.00094026 | 0.240728886 | 0.383864408 |
| cg05787839 | MORN1       | 1  | 0.00384181 | 0.266895316 | 0.391875379 |
| cg09811127 | MORN1;LOC:  | 1  | 0.00848735 | 0.52049383  | 0.637597004 |
| cg10828284 | MOV10L1;M   | 22 | 0.01110443 | 0.266536782 | 0.368440196 |
| cg17050616 | MOV10L1;M   | 22 | 0.00192681 | 0.272012774 | 0.397339616 |
| cg11839415 | MPL         | 1  | 0.02713001 | 0.292510118 | 0.427451577 |
| cg18856478 | MPL         | 1  | 0.00132031 | 0.156410073 | 0.25729996  |
| cg20120371 | MPP2        | 17 | 0.00272787 | 0.246580896 | 0.416755147 |
| cg15406585 | MPP7        | 10 | 5.79E-05   | 0.635754327 | 0.78017797  |
| cg16527477 | MPP7        | 10 | 0.0479268  | 0.302094752 | 0.40799339  |
| cg09850478 | MPPED1      | 22 | 0.00073359 | 0.19435007  | 0.363541444 |
| cg20545941 | MPPED1      | 22 | 0.00106511 | 0.20055148  | 0.3542225   |
| cg26455386 | MPRIP;MPRI  | 17 | 0.00609337 | 0.131267925 | 0.247816354 |
| cg04589050 | MPRIP;MPRI  | 17 | 0.03415368 | 0.672184382 | 0.787661073 |
| cg12014368 | MRAP;MRAP   | 21 | 0.04967949 | 0.748542411 | 0.853091397 |
| cg16200799 | MRC2        | 17 | 0.02705503 | 0.159968781 | 0.273103806 |
| cg10883064 | MRC2        | 17 | 0.02452013 | 0.584464732 | 0.689276143 |
| cg03289072 | MRC2        | 17 | 0.04997079 | 0.360574794 | 0.462258877 |
| cg16405908 | MRGPRES     | 11 | 0.00078633 | 0.259253626 | 0.420872088 |
| cg23683010 | MRGPRES     | 11 | 0.0081949  | 0.135176939 | 0.244064056 |
| cg25807487 | MRGPRF;MR   | 11 | 0.03520427 | 0.263760696 | 0.396942024 |
| cg18850728 | MRO;MRO;M   | 18 | 0.00776571 | 0.234734021 | 0.376542314 |
| cg13644645 | MRPL14      | 6  | 0.00985473 | 0.116785367 | 0.248834481 |
| cg05595134 | MRPL15      | 8  | 0.04405291 | 0.645922462 | 0.763163365 |
| cg11375053 | MRPL17      | 11 | 0.01554749 | 0.419939438 | 0.576314246 |
| cg24399028 | MRPL20      | 1  | 0.00052728 | 0.732410189 | 0.847008677 |
| cg02928928 | MRPL23      | 11 | 0.00033239 | 0.189852334 | 0.340227801 |
| cg04881472 | MRPL23      | 11 | 0.00088441 | 0.572765227 | 0.686318233 |
| cg26913058 | MRPL28      | 16 | 0.00523937 | 0.172170738 | 0.304019294 |
| cg17519037 | MRPL45      | 17 | 0.00657166 | 0.260029292 | 0.366237319 |
| cg06995967 | MRPS16;TTC  | 10 | 0.00115876 | 0.230280666 | 0.408706077 |
| cg21817750 | MRPS27      | 5  | 0.00390067 | 0.162602836 | 0.292894334 |
| cg04955683 | MRPS6       | 21 | 0.00945854 | 0.154093508 | 0.315536732 |
| cg02556430 | MRPS6;SLC5, | 21 | 0.00010385 | 0.37732178  | 0.628743209 |
| cg21291385 | MRPS6;SLC5, | 21 | 0.03900665 | 0.098165617 | 0.208309816 |
| cg15505860 | MRVI1;MRVI  | 11 | 0.04211689 | 0.406885066 | 0.526137476 |
| cg08298091 | MRVI1;MRVI  | 11 | 0.00294827 | 0.142747557 | 0.28695187  |
| cg00510149 | MRVI1;MRVI  | 11 | 0.01875627 | 0.512041461 | 0.654368366 |
| cg22762189 | MSGN1       | 2  | 0.01046564 | 0.426622682 | 0.55074514  |
| cg22149471 | MSI2        | 17 | 0.00126274 | 0.260922983 | 0.496007652 |
| cg07159758 | MSI2;MSI2   | 17 | 0.00493644 | 0.241125036 | 0.466896614 |
| cg13654836 | MSI2;MSI2   | 17 | 0.00141139 | 0.26450211  | 0.434855176 |
| cg08788712 | MSI2;MSI2   | 17 | 0.02547904 | 0.536083548 | 0.673439893 |
| cg17045539 | MSI2;MSI2   | 17 | 0.00133342 | 0.599923261 | 0.722238588 |

|            |            |    |            |             |             |
|------------|------------|----|------------|-------------|-------------|
| cg08677210 | MSI2;MSI2  | 17 | 0.04473561 | 0.419751118 | 0.535487615 |
| cg05347965 | MSI2;MSI2  | 17 | 0.00103239 | 0.100261302 | 0.205435663 |
| cg14264571 | MSMP       | 9  | 0.02548028 | 0.114011135 | 0.224162538 |
| cg01030886 | MSRB3;MSRI | 12 | 0.00259059 | 0.660531744 | 0.798310411 |
| cg24402128 | MST1P9     | 1  | 0.01060922 | 0.177970429 | 0.289140029 |
| cg24528866 | MSTN       | 2  | 0.01002355 | 0.692920258 | 0.805927649 |
| cg09748975 | MSX1       | 4  | 0.01795321 | 0.41483426  | 0.558279713 |
| cg21538208 | MSX1       | 4  | 0.00683353 | 0.297071839 | 0.431199718 |
| cg19001023 | MTA1       | 14 | 0.00247993 | 0.460066149 | 0.69420243  |
| cg18238340 | MTA1       | 14 | 0.01187959 | 0.340940364 | 0.513520457 |
| cg24183741 | MTA1       | 14 | 0.00082207 | 0.605194545 | 0.766107017 |
| cg24727433 | MTA1       | 14 | 0.02815116 | 0.465196483 | 0.610442778 |
| cg27055366 | MTA1       | 14 | 0.00016879 | 0.245564177 | 0.383282906 |
| cg04425783 | MTA1       | 14 | 0.01070376 | 0.274345117 | 0.377286553 |
| cg14454796 | MTERFD2;M' | 2  | 0.0035466  | 0.642123586 | 0.783278299 |
| cg24407092 | MTERFD2;M' | 2  | 0.00977973 | 0.59558526  | 0.724104261 |
| cg18920088 | MTHFD1L    | 6  | 1.50E-05   | 0.265238314 | 0.56255457  |
| cg04718883 | MTHFD1L    | 6  | 0.00390067 | 0.655466228 | 0.778220899 |
| cg01354656 | MTHFD1L    | 6  | 0.00059368 | 0.305741393 | 0.41627233  |
| cg02285003 | MTMR12     | 5  | 0.01414429 | 0.219847572 | 0.41170886  |
| cg06740866 | MTMR12     | 5  | 0.00275215 | 0.685022649 | 0.796437559 |
| cg24683185 | MTMR15     | 15 | 0.02686196 | 0.350489802 | 0.51423637  |
| cg14256977 | MTMR2;MTM  | 11 | 0.0021635  | 0.150193939 | 0.280591165 |
| cg06094043 | MTMR6      | 13 | 0.02367337 | 0.430010503 | 0.556183338 |
| cg19977866 | MTNR1B     | 11 | 0.0131784  | 0.743566854 | 0.854714624 |
| cg07122170 | MTOR;ANGP  | 1  | 0.02179004 | 0.250857487 | 0.427944686 |
| cg14287403 | MTR        | 1  | 0.00118049 | 0.197084111 | 0.351504387 |
| cg23629187 | MTSS1      | 8  | 0.03137571 | 0.543176365 | 0.693456378 |
| cg01304894 | MTSS1L     | 16 | 0.00133761 | 0.309926326 | 0.500795372 |
| cg07813065 | MTSS1L     | 16 | 0.00046123 | 0.367045055 | 0.551567061 |
| cg07128900 | MTSS1L     | 16 | 0.00015308 | 0.562372812 | 0.745808199 |
| cg19075081 | MTSS1L     | 16 | 0.00695634 | 0.347426986 | 0.522470113 |
| cg08996445 | MTSS1L     | 16 | 0.0078614  | 0.213605188 | 0.387303293 |
| cg00147286 | MTSS1L     | 16 | 0.0003673  | 0.541395036 | 0.675515611 |
| cg04898035 | MTUS1;MTU  | 8  | 0.0230262  | 0.524065665 | 0.665447359 |
| cg02698708 | MTUS1;MTU  | 8  | 0.00592295 | 0.36462752  | 0.491287459 |
| cg19520498 | MUC2       | 11 | 0.01642652 | 0.444224682 | 0.556863331 |
| cg25566714 | MUM1;MUM   | 19 | 0.00093472 | 0.766390518 | 0.913471395 |
| cg02413187 | MUM1;MUM   | 19 | 0.01207822 | 0.124557073 | 0.233844447 |
| cg03875235 | MUPCDH;ML  | 11 | 0.00146863 | 0.338551312 | 0.439894819 |
| cg13937462 | MUPCDH;ML  | 11 | 0.0060033  | 0.402953308 | 0.527075212 |
| cg14161107 | MUSK;MUSK  | 9  | 0.00976837 | 0.341876862 | 0.526782898 |
| cg21547371 | MUSTN1     | 3  | 0.03982784 | 0.12258662  | 0.228110372 |
| cg00367863 | MVP;MVP    | 16 | 0.01212269 | 0.609406801 | 0.723388681 |
| cg06439269 | MXD4       | 4  | 0.00148934 | 0.668152973 | 0.770720331 |
| cg08459783 | MXD4       | 4  | 0.00750603 | 0.309418124 | 0.411287677 |

|            |             |    |            |             |             |
|------------|-------------|----|------------|-------------|-------------|
| cg00004089 | MXRA7;MXR   | 17 | 0.00723779 | 0.59325265  | 0.715177924 |
| cg13393580 | MXRA8       | 1  | 0.00237505 | 0.284531301 | 0.404564288 |
| cg04863197 | MYADML2     | 17 | 0.00102382 | 0.292570011 | 0.42662413  |
| cg13189020 | MYBBP1A;M   | 17 | 0.00119463 | 0.229871517 | 0.393798476 |
| cg25930644 | MYH10       | 17 | 0.02345788 | 0.399848997 | 0.538739091 |
| cg15598069 | MYH10       | 17 | 0.0403502  | 0.591724177 | 0.728225684 |
| cg01828111 | MYH11;NDE:  | 16 | 0.02313154 | 0.630250025 | 0.750455031 |
| cg26749543 | MYH9        | 22 | 0.00012533 | 0.261397834 | 0.431127644 |
| cg24899871 | MYL10       | 7  | 0.00263535 | 0.320538473 | 0.478352098 |
| cg10123201 | MYL3        | 3  | 0.00258976 | 0.385635994 | 0.55255818  |
| cg08936706 | MYL3        | 3  | 0.0015227  | 0.342185852 | 0.49003039  |
| cg26394191 | MYLK;MYLK;l | 3  | 0.00431698 | 0.670941562 | 0.799211438 |
| cg20669834 | MYLK;MYLK;l | 3  | 0.01157963 | 0.583090754 | 0.717635774 |
| cg19007948 | MYLK4       | 6  | 0.00183826 | 0.189555085 | 0.396774145 |
| cg05713044 | MYO10       | 5  | 0.0190574  | 0.159005434 | 0.312004245 |
| cg26264133 | MYO18A;MY   | 17 | 0.00155676 | 0.430352449 | 0.659321607 |
| cg20142309 | MYO18A;MY   | 17 | 0.01406914 | 0.205087124 | 0.32283586  |
| cg03134230 | MYO1B;MYO   | 2  | 0.01063497 | 0.368124085 | 0.549762518 |
| cg20929407 | MYO1C;MYO   | 17 | 0.0491997  | 0.66752505  | 0.778738857 |
| cg25809561 | MYO1D       | 17 | 0.00440549 | 0.477673148 | 0.582163232 |
| cg12416830 | MYO1E       | 15 | 0.0499873  | 0.198959824 | 0.360658245 |
| cg13523014 | MYO1F       | 19 | 0.00163643 | 0.61123799  | 0.806268451 |
| cg22987448 | MYO1F       | 19 | 0.00028199 | 0.182907854 | 0.356095557 |
| cg15254671 | MYO1F       | 19 | 0.00012779 | 0.216773582 | 0.363859108 |
| cg22132788 | MYO1G       | 7  | 0.00049912 | 0.298592022 | 0.484238282 |
| cg19089201 | MYO1G       | 7  | 0.00134922 | 0.283248916 | 0.421282819 |
| cg01379730 | MYO3B;MYO   | 2  | 0.00055533 | 0.63682922  | 0.763373199 |
| cg01868896 | MYO5C       | 15 | 0.00450681 | 0.689421461 | 0.813597707 |
| cg14100211 | MYO9A;SENF  | 15 | 0.00015596 | 0.46822471  | 0.680881227 |
| cg16526705 | MYO9B;MYO   | 19 | 0.00030197 | 0.59077044  | 0.710235245 |
| cg01410279 | MYOC        | 1  | 0.02870269 | 0.276578068 | 0.467627805 |
| cg00806505 | MYOC        | 1  | 0.00095422 | 0.388156037 | 0.557619751 |
| cg04852893 | MYOCD;MYC   | 17 | 0.00784807 | 0.281705856 | 0.47466397  |
| cg23636406 | MYOCD;MYC   | 17 | 0.00821976 | 0.269916254 | 0.457824664 |
| cg17800426 | MYOZ3;MYO   | 5  | 0.00849739 | 0.152518667 | 0.28320954  |
| cg07337385 | MYOZ3;MYO   | 5  | 0.01764009 | 0.649480323 | 0.751651716 |
| cg13214422 | MYOZ3;MYO   | 5  | 0.00339033 | 0.604382672 | 0.729887289 |
| cg08549216 | MYST1;MYST  | 16 | 0.00073719 | 0.613659288 | 0.744203494 |
| cg15370732 | MYST2       | 17 | 0.00121732 | 0.589160867 | 0.758852195 |
| cg11849327 | MYST4       | 10 | 0.01633933 | 0.401189381 | 0.548477847 |
| cg08789630 | MYST4       | 10 | 0.00309376 | 0.67300071  | 0.809863828 |
| cg06752157 | MYST4       | 10 | 0.01071909 | 0.749899763 | 0.85413715  |
| cg20860726 | MYT1L       | 2  | 0.01752372 | 0.195273681 | 0.333016247 |
| cg03852659 | MYT1L       | 2  | 0.01635267 | 0.16488682  | 0.300117179 |
| cg14987112 | MYT1L       | 2  | 0.00521231 | 0.192186936 | 0.295632461 |
| cg10178270 | MYT1L       | 2  | 0.0203746  | 0.723319783 | 0.824678054 |



|            |             |    |            |             |             |
|------------|-------------|----|------------|-------------|-------------|
| cg02493986 | NACC2       | 9  | 0.00083967 | 0.344882651 | 0.633565633 |
| cg13849232 | NACC2       | 9  | 0.00392391 | 0.606291918 | 0.741796892 |
| cg14152854 | NACC2       | 9  | 0.00837394 | 0.569708152 | 0.698510717 |
| cg17855991 | NAP1L4      | 11 | 0.00095528 | 0.768038833 | 0.907434964 |
| cg23954731 | NAT14       | 19 | 0.00034495 | 0.323155839 | 0.43642793  |
| cg06423357 | NAT14       | 19 | 0.00050818 | 0.356821199 | 0.457834827 |
| cg05029983 | NAT8L       | 4  | 0.00612315 | 0.275124546 | 0.403530776 |
| cg05695876 | NAV1        | 1  | 0.00161376 | 0.168558316 | 0.341821954 |
| cg19827875 | NAV1        | 1  | 0.00076847 | 0.306276551 | 0.456559254 |
| cg03400139 | NAV1        | 1  | 0.01091352 | 0.30335132  | 0.426637494 |
| cg20491406 | NAV1        | 1  | 0.0008332  | 0.587663452 | 0.700994015 |
| cg04287574 | NAV1        | 1  | 0.01747975 | 0.125778656 | 0.231477902 |
| cg14969261 | NAV2        | 11 | 0.00071291 | 0.345195461 | 0.57215158  |
| cg00491064 | NAV2        | 11 | 0.00400678 | 0.201691079 | 0.354844735 |
| cg18009574 | NAV2;NAV2;  | 11 | 0.00524911 | 0.263256479 | 0.423477521 |
| cg22701534 | NAV2;NAV2;  | 11 | 0.04920134 | 0.261634303 | 0.406463148 |
| cg19673484 | NAV2;NAV2;  | 11 | 0.02581659 | 0.426357722 | 0.539341256 |
| cg23371436 | NAV2;NAV2;  | 11 | 0.00989705 | 0.35320543  | 0.494323875 |
| cg09175834 | NAV3        | 12 | 0.00666445 | 0.433842892 | 0.619289561 |
| cg01816186 | NBAS        | 2  | 0.00043795 | 0.382105869 | 0.59682695  |
| cg09936572 | NBPF1       | 1  | 0.02619352 | 0.330604049 | 0.47236214  |
| cg10518282 | NCAM1;NCA   | 11 | 0.02669489 | 0.208686426 | 0.339201502 |
| cg19865916 | NCDN;NCDN   | 1  | 0.00017364 | 0.456943832 | 0.64782309  |
| cg19758142 | NCEH1;NCEH  | 3  | 0.00593031 | 0.414427141 | 0.668736972 |
| cg03729042 | NCF2;NCF2   | 1  | 0.02705503 | 0.331430808 | 0.471980033 |
| cg22687475 | NCK2;NCK2;N | 2  | 0.00083907 | 0.711012193 | 0.838833718 |
| cg20444370 | NCKAP1;NCK  | 2  | 0.00240366 | 0.331923975 | 0.455639941 |
| cg06389574 | NCKAP5;NCK  | 2  | 0.00658669 | 0.301116681 | 0.44347584  |
| cg01290856 | NCKAP5;NCK  | 2  | 0.03061367 | 0.380914633 | 0.497987795 |
| cg24301352 | NCLN        | 19 | 0.0053572  | 0.45724069  | 0.573981365 |
| cg27015161 | NCOA1;NCO   | 2  | 0.00370689 | 0.216801099 | 0.470241092 |
| cg08325898 | NCOA2       | 8  | 0.0277376  | 0.393610317 | 0.535288287 |
| cg13335567 | NCOA2       | 8  | 0.0281116  | 0.203338331 | 0.343270866 |
| cg11197258 | NCOR2;NCOF  | 12 | 0.00079501 | 0.242895113 | 0.520728164 |
| cg10996589 | NCOR2;NCOF  | 12 | 0.00112537 | 0.333045799 | 0.561586237 |
| cg27044649 | NCOR2;NCOF  | 12 | 0.00378906 | 0.37161959  | 0.564614564 |
| cg19341309 | NCOR2;NCOF  | 12 | 0.00263778 | 0.210324408 | 0.393952391 |
| cg20494738 | NCOR2;NCOF  | 12 | 0.00039343 | 0.67205953  | 0.85327805  |
| cg17429587 | NCOR2;NCOF  | 12 | 0.00019986 | 0.495713213 | 0.670651531 |
| cg04544533 | NCOR2;NCOF  | 12 | 0.0144246  | 0.535051396 | 0.699937479 |
| cg10082088 | NCOR2;NCOF  | 12 | 0.0004559  | 0.301616465 | 0.451071489 |
| cg20251110 | NCOR2;NCOF  | 12 | 0.00230022 | 0.469311477 | 0.617523651 |
| cg10283674 | NCOR2;NCOF  | 12 | 0.00046317 | 0.42155528  | 0.564207518 |
| cg09831875 | NCOR2;NCOF  | 12 | 0.00332444 | 0.198745207 | 0.335956655 |
| cg27653901 | NCOR2;NCOF  | 12 | 0.00294665 | 0.513660494 | 0.65027062  |
| cg03406367 | NCOR2;NCOF  | 12 | 0.01572819 | 0.134153066 | 0.266676414 |

|            |             |    |            |             |             |
|------------|-------------|----|------------|-------------|-------------|
| cg08276543 | NCOR2;NCOF  | 12 | 0.00035088 | 0.392325626 | 0.522400788 |
| cg10849160 | NCOR2;NCOF  | 12 | 0.01131519 | 0.160440703 | 0.286051862 |
| cg24432389 | NCOR2;NCOF  | 12 | 0.00117192 | 0.330609707 | 0.453491563 |
| cg13712197 | NCOR2;NCOF  | 12 | 0.03337939 | 0.147608097 | 0.270211436 |
| cg20978380 | NCOR2;NCOF  | 12 | 0.0151102  | 0.263373017 | 0.384199267 |
| cg09676622 | NCOR2;NCOF  | 12 | 0.00353612 | 0.419895571 | 0.537766612 |
| cg11601197 | NCOR2;NCOF  | 12 | 0.00725519 | 0.615990887 | 0.727304587 |
| cg22611259 | NCOR2;NCOF  | 12 | 5.39E-05   | 0.733612359 | 0.84273537  |
| cg24461063 | NCOR2;NCOF  | 12 | 0.00033097 | 0.711142128 | 0.816427191 |
| cg24446009 | NCOR2;NCOF  | 12 | 0.00093174 | 0.611729168 | 0.715554715 |
| cg16496462 | NCOR2;NCOF  | 12 | 0.01253961 | 0.257655324 | 0.361279932 |
| cg04579183 | NCRNA00052  | 15 | 0.00172792 | 0.486439761 | 0.736097938 |
| cg10859327 | NCRNA00093  | 10 | 0.0033214  | 0.233492998 | 0.510302308 |
| cg03938110 | NCRNA00110  | 21 | 0.00281272 | 0.230881306 | 0.392511855 |
| cg02532853 | NCRNA00114  | 21 | 0.00079617 | 0.308389535 | 0.49945872  |
| cg13049432 | NCRNA00114  | 21 | 0.00191206 | 0.519683361 | 0.652877613 |
| cg12025048 | NCRNA00162  | 21 | 0.00042579 | 0.27297471  | 0.397131023 |
| cg17611512 | NCRNA00175  | 21 | 0.00223186 | 0.257267901 | 0.389955408 |
| cg25623524 | NCRNA00181  | 19 | 0.00216608 | 0.151936925 | 0.308060526 |
| cg04892600 | NCRNA00188  | 17 | 0.01775944 | 0.197995902 | 0.32614246  |
| cg26868806 | NCRNA00200  | 10 | 0.00910949 | 0.460159072 | 0.572512334 |
| cg02396982 | NDE1;NDE1   | 16 | 0.00283284 | 0.525767165 | 0.66037785  |
| cg10078898 | NDRG2;NDRG  | 14 | 0.00220092 | 0.156664091 | 0.263640244 |
| cg16674484 | NDST1       | 5  | 0.03098552 | 0.263250567 | 0.395086159 |
| cg08895618 | NDST1       | 5  | 0.0202307  | 0.126523655 | 0.25778217  |
| cg02633363 | NDST1       | 5  | 0.01933209 | 0.351773454 | 0.458308584 |
| cg15337815 | NDST1       | 5  | 0.02477796 | 0.475101249 | 0.577706471 |
| cg05143012 | NDUFA4      | 7  | 0.00394117 | 0.707880256 | 0.836238554 |
| cg08733553 | NDUFAB1     | 16 | 0.00023311 | 0.606066723 | 0.750583648 |
| cg07815856 | NEBL        | 10 | 0.00285186 | 0.232316722 | 0.354446573 |
| cg05690808 | NECAB2      | 16 | 0.00209303 | 0.679717978 | 0.78075825  |
| cg00525496 | NEDD9;NEDD  | 6  | 0.01801339 | 0.471596425 | 0.593498195 |
| cg13974765 | NEK6;NEK6;N | 9  | 0.0073659  | 0.2390404   | 0.362659857 |
| cg02923047 | NELF;NELF;N | 9  | 0.00089898 | 0.378161446 | 0.495647926 |
| cg11706790 | NEU4;NEU4   | 2  | 0.00112761 | 0.465678429 | 0.647056274 |
| cg18095041 | NEU4;NEU4   | 2  | 0.00021379 | 0.372508498 | 0.546673322 |
| cg16660312 | NEU4;NEU4   | 2  | 0.00140413 | 0.34794635  | 0.497612413 |
| cg24429037 | NEU4;NEU4   | 2  | 0.01086792 | 0.507148011 | 0.641589145 |
| cg10504150 | NEU4;NEU4   | 2  | 0.00999412 | 0.581633042 | 0.692389879 |
| cg20791593 | NEU4;NEU4;I | 2  | 0.00403581 | 0.242515783 | 0.416237534 |
| cg01691332 | NEURL1B     | 5  | 0.00098188 | 0.203157704 | 0.415200055 |
| cg02358362 | NEURL1B     | 5  | 0.00709029 | 0.154524961 | 0.292431968 |
| cg22880770 | NEURL3      | 2  | 0.00157575 | 0.237174508 | 0.339491712 |
| cg17505852 | NF2;NF2;NF2 | 22 | 0.02381159 | 0.161447759 | 0.336605048 |
| cg20290360 | NFASC;NFAS  | 1  | 0.00076994 | 0.695277664 | 0.796540762 |
| cg13098379 | NFASC;NFAS  | 1  | 0.00393003 | 0.506804544 | 0.685894377 |

|            |            |    |            |             |             |
|------------|------------|----|------------|-------------|-------------|
| cg27426044 | NFASC;NFAS | 1  | 0.01554364 | 0.350689609 | 0.480012177 |
| cg12046837 | NFASC;NFAS | 1  | 0.01610414 | 0.368342184 | 0.471714205 |
| cg04110750 | NFAT5;NFAT | 16 | 0.00333912 | 0.286032551 | 0.524539783 |
| cg14715383 | NFATC1;NFA | 18 | 0.00382043 | 0.337795174 | 0.557521531 |
| cg11321921 | NFATC1;NFA | 18 | 0.0144304  | 0.518058569 | 0.736039952 |
| cg13731636 | NFATC1;NFA | 18 | 0.00503202 | 0.437839817 | 0.629475077 |
| cg23240477 | NFATC1;NFA | 18 | 0.00941718 | 0.198642895 | 0.368905015 |
| cg05859578 | NFATC1;NFA | 18 | 0.00158757 | 0.260636575 | 0.424033785 |
| cg15517343 | NFATC1;NFA | 18 | 0.0011912  | 0.444222462 | 0.604160566 |
| cg05718035 | NFATC1;NFA | 18 | 0.00180994 | 0.333178819 | 0.488813121 |
| cg18590092 | NFATC1;NFA | 18 | 0.01170732 | 0.26896924  | 0.418786299 |
| cg16536399 | NFATC1;NFA | 18 | 0.00272127 | 0.339068624 | 0.484682405 |
| cg22532194 | NFATC1;NFA | 18 | 0.00430937 | 0.495411349 | 0.620669376 |
| cg07740306 | NFATC1;NFA | 18 | 0.01096266 | 0.141620474 | 0.249147908 |
| cg16182267 | NFATC1;NFA | 18 | 0.00067012 | 0.392365736 | 0.495382787 |
| cg20542619 | NFATC1;NFA | 18 | 0.00707743 | 0.548983113 | 0.649567829 |
| cg07342752 | NFATC1;NFA | 18 | 0.00031733 | 0.476162417 | 0.706306872 |
| cg05264214 | NFATC1;NFA | 18 | 0.00043188 | 0.24449428  | 0.472246383 |
| cg27019645 | NFATC1;NFA | 18 | 0.00050556 | 0.187846866 | 0.369373156 |
| cg25546405 | NFATC1;NFA | 18 | 0.03176542 | 0.144659463 | 0.320984161 |
| cg25951288 | NFATC1;NFA | 18 | 0.00299893 | 0.175382301 | 0.329655151 |
| cg10357989 | NFATC1;NFA | 18 | 0.00231086 | 0.392870677 | 0.529134145 |
| cg15532942 | NFATC1;NFA | 18 | 0.02556644 | 0.154986074 | 0.277625221 |
| cg16308790 | NFATC1;NFA | 18 | 0.00502589 | 0.359640653 | 0.481917705 |
| cg15908877 | NFATC1;NFA | 18 | 0.00064269 | 0.580627411 | 0.696767788 |
| cg26915704 | NFATC1;NFA | 18 | 0.0448249  | 0.568056323 | 0.669193633 |
| cg25332265 | NFATC1;NFA | 18 | 0.00055779 | 0.42714791  | 0.527848331 |
| cg16253249 | NFATC1;NFA | 18 | 0.04190072 | 0.499187793 | 0.59985754  |
| cg09773897 | NFIC       | 19 | 0.01505709 | 0.42392558  | 0.571440104 |
| cg16588649 | NFIC;NFIC  | 19 | 0.0009184  | 0.374489654 | 0.56033666  |
| cg15658793 | NFIC;NFIC  | 19 | 0.0003023  | 0.173133456 | 0.313652806 |
| cg27171201 | NFIC;NFIC  | 19 | 0.00858452 | 0.244228115 | 0.364393151 |
| cg22315974 | NFIC;NFIC  | 19 | 0.00627185 | 0.126590727 | 0.245775474 |
| cg15224023 | NFIC;NFIC  | 19 | 0.00042172 | 0.283606328 | 0.392759487 |
| cg21584759 | NFIC;NFIC  | 19 | 0.00589751 | 0.349575116 | 0.457834444 |
| cg04340258 | NFIC;NFIC  | 19 | 0.00055312 | 0.253863201 | 0.360058275 |
| cg05636830 | NFIC;NFIC  | 19 | 0.02611542 | 0.641807901 | 0.742053853 |
| cg22824635 | NFIX       | 19 | 0.01036337 | 0.328948237 | 0.560190616 |
| cg13649253 | NFIX       | 19 | 0.02371532 | 0.308242202 | 0.476871835 |
| cg06623668 | NFIX       | 19 | 0.02014691 | 0.45604375  | 0.617783844 |
| cg15783941 | NFIX       | 19 | 0.00314371 | 0.235416612 | 0.38991217  |
| cg01634146 | NFIX       | 19 | 0.02144788 | 0.161622462 | 0.300075473 |
| cg10767662 | NFIX       | 19 | 0.03354806 | 0.121308299 | 0.242544546 |
| cg09394128 | NFIX       | 19 | 0.00053553 | 0.393883617 | 0.512670119 |
| cg12522311 | NFIX       | 19 | 0.00815285 | 0.155166228 | 0.270719357 |
| cg19309341 | NFIX       | 19 | 0.00116614 | 0.147235202 | 0.262205151 |

|            |             |    |            |             |             |
|------------|-------------|----|------------|-------------|-------------|
| cg15787744 | NFKBIE      | 6  | 0.00229967 | 0.495285137 | 0.615787882 |
| cg12499092 | NFYB        | 12 | 0.00011854 | 0.666403385 | 0.832786882 |
| cg19433021 | NFYB        | 12 | 0.00222195 | 0.262672049 | 0.372999036 |
| cg12421282 | NFYC;NFYC;L | 1  | 0.01378466 | 0.358204752 | 0.540439974 |
| cg11135080 | NFYC;NFYC;N | 1  | 0.00230117 | 0.454544758 | 0.606975918 |
| cg17048169 | NGEF;NGEF   | 2  | 0.00021167 | 0.189369109 | 0.412344418 |
| cg20388707 | NGEF;NGEF   | 2  | 0.00181891 | 0.326731509 | 0.443485548 |
| cg20539430 | NGEF;NGEF   | 2  | 0.01794149 | 0.599307766 | 0.710498888 |
| cg26178217 | NGEF;NGEF   | 2  | 0.00348768 | 0.616286868 | 0.724357986 |
| cg24367967 | NGEF;NGEF   | 2  | 0.01337093 | 0.432142142 | 0.537061943 |
| cg26152051 | NHEJ1       | 2  | 0.00791879 | 0.562259951 | 0.736172989 |
| cg08106288 | NHEJ1       | 2  | 0.01388774 | 0.113580767 | 0.243330764 |
| cg04497992 | NHLRC4      | 16 | 0.00055533 | 0.236641972 | 0.337505715 |
| cg03379797 | NHSL1       | 6  | 0.00345548 | 0.148972686 | 0.331378103 |
| cg24324628 | NHSL1       | 6  | 0.01486505 | 0.216252706 | 0.379490597 |
| cg21543918 | NHSL1;NHSL: | 6  | 0.02205533 | 0.116794566 | 0.241476973 |
| cg21730858 | NHSL1;NHSL: | 6  | 0.03793763 | 0.361519237 | 0.48119415  |
| cg22129571 | NID1        | 1  | 0.03289332 | 0.546945801 | 0.663854319 |
| cg16449219 | NIN;NIN;NIN | 14 | 0.03610699 | 0.144016409 | 0.291492409 |
| cg13802506 | NINJ1       | 9  | 0.00697093 | 0.14987306  | 0.251702132 |
| cg01122318 | NIPSNAP3B   | 9  | 0.04317521 | 0.757486633 | 0.874423065 |
| cg04155718 | NISCH       | 3  | 0.00900942 | 0.672726239 | 0.814520092 |
| cg01827248 | NKD1        | 16 | 0.00098311 | 0.297478821 | 0.490624605 |
| cg02015823 | NKD1        | 16 | 0.01886699 | 0.272367876 | 0.405546212 |
| cg05779675 | NKD1        | 16 | 0.00184547 | 0.338510237 | 0.457220596 |
| cg16750777 | NKD1        | 16 | 0.00055517 | 0.288727395 | 0.403430921 |
| cg04685962 | NKD1        | 16 | 0.01645485 | 0.5768281   | 0.688294476 |
| cg03854487 | NKD1        | 16 | 0.00029138 | 0.584208252 | 0.68638118  |
| cg06437430 | NKD2        | 5  | 0.01536545 | 0.312274353 | 0.422573138 |
| cg21904441 | NLGN1       | 3  | 0.00272813 | 0.727202529 | 0.829730576 |
| cg09624807 | NLRC5       | 16 | 0.00015493 | 0.387365307 | 0.62133555  |
| cg07121721 | NLRP1       | 17 | 6.30E-05   | 0.199411177 | 0.454063737 |
| cg19972788 | NLRP1;LOC7: | 17 | 0.00448506 | 0.415396186 | 0.561514872 |
| cg19689876 | NLRP2       | 19 | 0.03107357 | 0.509833473 | 0.718497337 |
| cg04887076 | NLRP2       | 19 | 0.04633149 | 0.451293406 | 0.653326232 |
| cg25651476 | NLRP2       | 19 | 0.04172146 | 0.492455063 | 0.639522904 |
| cg03401213 | NME2;NME2   | 17 | 0.0226126  | 0.657179294 | 0.759347047 |
| cg06877848 | NME2;NME2   | 17 | 0.02497399 | 0.59638621  | 0.718019998 |
| cg27233027 | NME7;NME7   | 1  | 0.02323914 | 0.503657136 | 0.681601525 |
| cg02016985 | NMRAL1      | 16 | 0.00103917 | 0.520078262 | 0.648975779 |
| cg22871610 | NMU         | 4  | 0.0220445  | 0.717782221 | 0.862890231 |
| cg23731742 | NOC2L;SAMC  | 1  | 0.00051123 | 0.193684901 | 0.307295985 |
| cg20299802 | NOS1AP;NOS  | 1  | 0.01527687 | 0.308959027 | 0.441307157 |
| cg06301529 | NOS2;NOS2   | 17 | 0.02347041 | 0.135231946 | 0.29215968  |
| cg07150830 | NOS2;NOS2   | 17 | 0.03314054 | 0.124480248 | 0.241129773 |
| cg26274166 | NOSIP       | 19 | 0.01886496 | 0.375999981 | 0.539316813 |

|            |             |    |            |             |             |
|------------|-------------|----|------------|-------------|-------------|
| cg21292909 | NOSIP       | 19 | 0.00593434 | 0.516376291 | 0.668417911 |
| cg04355077 | NOSIP       | 19 | 0.00761484 | 0.685192211 | 0.794340608 |
| cg14494733 | NOTCH1      | 9  | 7.02E-05   | 0.340285003 | 0.692960519 |
| cg14528979 | NOTCH1      | 9  | 0.00978051 | 0.385810269 | 0.601245092 |
| cg14205001 | NOTCH1      | 9  | 5.22E-05   | 0.610533636 | 0.787853589 |
| cg05019807 | NOTCH1      | 9  | 0.00114145 | 0.707164917 | 0.834807134 |
| cg26779406 | NOTCH1      | 9  | 0.00058836 | 0.361580445 | 0.48205867  |
| cg21234123 | NOTCH1      | 9  | 0.0018158  | 0.680649774 | 0.792577085 |
| cg14364472 | NOTCH1      | 9  | 0.0406997  | 0.675062599 | 0.784580507 |
| cg14303017 | NOTCH1      | 9  | 0.00057103 | 0.72640705  | 0.82686794  |
| cg08801479 | NOTCH4      | 6  | 0.01703888 | 0.162735633 | 0.305452177 |
| cg08828723 | NOTCH4      | 6  | 0.00219383 | 0.25236911  | 0.38568475  |
| cg21765730 | NOX3        | 6  | 0.00544746 | 0.137942435 | 0.325659034 |
| cg02156899 | NOXO1;NOXI  | 16 | 0.00229588 | 0.246759814 | 0.375918853 |
| cg26047938 | NPAS2       | 2  | 0.02105583 | 0.229399041 | 0.401778071 |
| cg23633210 | NPAS2       | 2  | 0.03663957 | 0.179582015 | 0.316403051 |
| cg10147348 | NPAS2       | 2  | 0.00440549 | 0.583726816 | 0.706106241 |
| cg13496915 | NPAS3;NPAS  | 14 | 0.0030781  | 0.223178006 | 0.468284464 |
| cg02094363 | NPAS3;NPAS  | 14 | 0.00637775 | 0.356295633 | 0.509481039 |
| cg07507257 | NPC1        | 18 | 0.0350369  | 0.615967539 | 0.720631582 |
| cg10100287 | NPHP4       | 1  | 0.01166754 | 0.454275405 | 0.565797199 |
| cg13019512 | NPM1;NPM1   | 5  | 0.00249627 | 0.36170627  | 0.505082326 |
| cg04865220 | NPTN;NPTN;  | 15 | 0.0057467  | 0.198775132 | 0.356591455 |
| cg22082015 | NR1D1       | 17 | 0.04503329 | 0.440591688 | 0.553155067 |
| cg24975211 | NR1D1;THRA  | 17 | 0.01847738 | 0.136316159 | 0.26245581  |
| cg06927327 | NR1I3;NR1I3 | 1  | 0.00422066 | 0.609600103 | 0.712664226 |
| cg26933107 | NR4A1;NR4A  | 12 | 0.00064112 | 0.398584985 | 0.551287041 |
| cg18713088 | NR4A1;NR4A  | 12 | 0.00055136 | 0.533630027 | 0.679216473 |
| cg13216112 | NRBF2       | 10 | 0.02242232 | 0.24600383  | 0.405343831 |
| cg23221090 | NRBF2       | 10 | 0.00157588 | 0.182862308 | 0.297452187 |
| cg01540911 | NRF1;NRF1   | 7  | 0.01147973 | 0.434486507 | 0.584038442 |
| cg20712980 | NRF1;NRF1   | 7  | 0.03502267 | 0.314502029 | 0.422442898 |
| cg24724630 | NRG2;NRG2;  | 5  | 0.00106511 | 0.315646247 | 0.461847524 |
| cg01068601 | NRN1L       | 16 | 0.00031619 | 0.262177543 | 0.439012947 |
| cg01756421 | NRN1L       | 16 | 0.001785   | 0.303638884 | 0.426033433 |
| cg21701445 | NRSN2       | 20 | 0.04311044 | 0.424426719 | 0.525757092 |
| cg06609051 | NRXN1;NRXN  | 2  | 0.02523013 | 0.330000666 | 0.458895427 |
| cg21660452 | NRXN2;NRXN  | 11 | 0.02583317 | 0.504675367 | 0.650878138 |
| cg27466845 | NRXN2;NRXN  | 11 | 0.0024662  | 0.146751755 | 0.268645643 |
| cg10905012 | NRXN2;NRXN  | 11 | 0.02956749 | 0.710668999 | 0.818679294 |
| cg18121224 | NSD1;NSD1   | 5  | 0.00209045 | 0.14901991  | 0.30335456  |
| cg19731612 | NSD1;NSD1   | 5  | 0.00142908 | 0.305077982 | 0.42366312  |
| cg23126947 | NSUN3;DHFF  | 3  | 0.03182383 | 0.703535437 | 0.840619613 |
| cg12034199 | NSUN5B;NSL  | 7  | 0.00226552 | 0.48048726  | 0.591364294 |
| cg14113960 | NSUN5B;NSL  | 7  | 0.01687986 | 0.406100275 | 0.510927986 |
| cg16236779 | NT5C2;NT5C  | 10 | 0.0108749  | 0.491471417 | 0.633854511 |

|            |            |    |            |             |             |
|------------|------------|----|------------|-------------|-------------|
| cg02344784 | NT5DC3     | 12 | 0.00538477 | 0.27796888  | 0.444226078 |
| cg02042623 | NT5DC3     | 12 | 0.02368594 | 0.142400638 | 0.297812131 |
| cg12620806 | NTF3;NTF3  | 12 | 0.03547641 | 0.48396353  | 0.64664944  |
| cg11647944 | NTF3;NTF3  | 12 | 0.00932111 | 0.21227331  | 0.364577522 |
| cg18377376 | NTM        | 11 | 0.00050013 | 0.477946531 | 0.685153084 |
| cg23405457 | NTM        | 11 | 0.00199205 | 0.567191001 | 0.720613392 |
| cg11754374 | NTM        | 11 | 0.00444301 | 0.755647746 | 0.889793609 |
| cg20827960 | NTM;NTM;N  | 11 | 0.00233053 | 0.604056683 | 0.774390493 |
| cg16996632 | NTM;NTM;N  | 11 | 0.00692168 | 0.508477594 | 0.666273432 |
| cg07114544 | NTN1       | 17 | 0.00365834 | 0.184411603 | 0.386929958 |
| cg19441674 | NTN1       | 17 | 0.00391663 | 0.40327675  | 0.53360302  |
| cg14447193 | NTRK2;NTRK | 9  | 0.00164693 | 0.15251077  | 0.293643026 |
| cg02926307 | NUAK1      | 12 | 0.0040674  | 0.221363856 | 0.397098241 |
| cg07831164 | NUBP1      | 16 | 0.01756182 | 0.12517876  | 0.225419777 |
| cg02458499 | NUDCD1;NU  | 8  | 0.00939271 | 0.771149011 | 0.880139228 |
| cg07508429 | NUDCD3     | 7  | 0.01624188 | 0.332457742 | 0.525909381 |
| cg16251232 | NUDCD3     | 7  | 0.00288433 | 0.460193604 | 0.631433099 |
| cg24829430 | NUDCD3     | 7  | 0.00822402 | 0.597494303 | 0.717849105 |
| cg21733560 | NUDT1;NUD  | 7  | 0.00066183 | 0.324190852 | 0.443961025 |
| cg14705010 | NUMA1      | 11 | 0.00042053 | 0.213653517 | 0.423190717 |
| cg20887442 | NUMA1      | 11 | 0.00021343 | 0.196413998 | 0.389818089 |
| cg07999415 | NUMA1      | 11 | 0.00417147 | 0.280562062 | 0.417221939 |
| cg11196788 | NUMA1      | 11 | 0.00330261 | 0.281123274 | 0.415871068 |
| cg02151120 | NUMA1      | 11 | 0.00189686 | 0.236101811 | 0.358954869 |
| cg19126169 | NUMA1      | 11 | 0.0029451  | 0.388749925 | 0.505693053 |
| cg05874355 | NUMA1      | 11 | 0.00350313 | 0.138833518 | 0.250987565 |
| cg03033106 | NUMA1;LRTC | 11 | 0.02195273 | 0.450148136 | 0.554193226 |
| cg03352427 | NUP210L;NU | 1  | 0.00382683 | 0.30007444  | 0.459976226 |
| cg17167920 | NUP210L;NU | 1  | 0.01062756 | 0.264173543 | 0.398570883 |
| cg00138451 | NUP88      | 17 | 0.04407932 | 0.723685326 | 0.834588974 |
| cg10093067 | NUP98;NUP9 | 11 | 0.02291751 | 0.368349405 | 0.54858143  |
| cg21035374 | NWD1;NWD1  | 19 | 0.00628048 | 0.423534731 | 0.558614873 |
| cg20633370 | NXN        | 17 | 0.01703505 | 0.506848064 | 0.655868705 |
| cg24101979 | NXN        | 17 | 0.01230787 | 0.397681572 | 0.538088363 |
| cg14136893 | NXN        | 17 | 0.00142219 | 0.26365419  | 0.382572347 |
| cg23768572 | NXN        | 17 | 0.0083632  | 0.143553272 | 0.255157084 |
| cg19983775 | OAT        | 10 | 0.03793763 | 0.149875075 | 0.303879563 |
| cg23644589 | OBSCN;OBSC | 1  | 0.00633272 | 0.68622366  | 0.876802013 |
| cg18494421 | OBSCN;OBSC | 1  | 0.00497506 | 0.267324324 | 0.425898184 |
| cg05794117 | OBSCN;OBSC | 1  | 0.00304405 | 0.271304679 | 0.395475389 |
| cg15618533 | OBSCN;OBSC | 1  | 0.00098784 | 0.539177829 | 0.64606789  |
| cg07922933 | OBSCN;OBSC | 1  | 0.01074336 | 0.30268996  | 0.408526461 |
| cg05521175 | OBSL1      | 2  | 0.03765522 | 0.265037689 | 0.419656451 |
| cg02938449 | OBSL1      | 2  | 0.00043674 | 0.510928186 | 0.645912865 |
| cg14037346 | ODF2       | 9  | 0.00255189 | 0.166056162 | 0.322224231 |
| cg06608378 | ODF3L1     | 15 | 0.00067726 | 0.584349656 | 0.707828008 |

|            |             |    |            |             |             |
|------------|-------------|----|------------|-------------|-------------|
| cg00047753 | ODF4        | 17 | 0.02737301 | 0.215780937 | 0.335067485 |
| cg11097249 | ODZ2        | 5  | 0.00828079 | 0.29347275  | 0.481103472 |
| cg00192966 | ODZ2        | 5  | 0.02669496 | 0.232642449 | 0.371420234 |
| cg12025243 | ODZ4        | 11 | 0.00012062 | 0.414777639 | 0.569979251 |
| cg21094613 | ODZ4        | 11 | 0.02716052 | 0.22425662  | 0.37188073  |
| cg11172483 | ODZ4        | 11 | 0.04578211 | 0.224586209 | 0.359099285 |
| cg27153782 | OLAH;OLAH   | 10 | 0.00443791 | 0.31123133  | 0.487477149 |
| cg16013670 | OPN3        | 1  | 0.00249168 | 0.445306735 | 0.582804102 |
| cg09970593 | OPRD1       | 1  | 0.00065199 | 0.277435411 | 0.461150517 |
| cg25977504 | OR14A16     | 1  | 0.00986676 | 0.646258358 | 0.754848954 |
| cg16833110 | OR2D3       | 11 | 0.01848374 | 0.664909079 | 0.823139769 |
| cg02788731 | OR2G2       | 1  | 0.01832743 | 0.705474035 | 0.828024894 |
| cg12762474 | OR51V1      | 11 | 0.03270999 | 0.518586694 | 0.618649037 |
| cg20251156 | OR6C65      | 12 | 0.00822    | 0.767503893 | 0.891349916 |
| cg22539670 | OSBPL10     | 3  | 0.00850677 | 0.420223074 | 0.595767491 |
| cg09641663 | OSBPL10     | 3  | 0.01321046 | 0.299312171 | 0.46421515  |
| cg20110978 | OSBPL3;OSBI | 7  | 0.00083484 | 0.749271978 | 0.873502877 |
| cg14722290 | OSBPL5;OSBI | 11 | 0.02063606 | 0.183195865 | 0.294028243 |
| cg26949612 | OSBPL6      | 2  | 0.01963184 | 0.540925093 | 0.659207992 |
| cg26009944 | OSBPL9;OSBI | 1  | 0.03160208 | 0.353004846 | 0.476974651 |
| cg13229961 | OVOL1       | 11 | 0.03436535 | 0.402413329 | 0.530793567 |
| cg10518572 | OVOL1       | 11 | 0.01747975 | 0.55178346  | 0.653154355 |
| cg16887334 | OXT         | 20 | 0.01503226 | 0.311287474 | 0.420655856 |
| cg03739877 | P11;P11     | 12 | 8.46E-05   | 0.469515374 | 0.606254959 |
| cg17560283 | P2RX3       | 11 | 0.01778762 | 0.629582906 | 0.731045531 |
| cg06651752 | P2RX5;P2RX5 | 17 | 0.00538477 | 0.268837216 | 0.400802092 |
| cg10287137 | P2RY2;P2RY2 | 11 | 8.27E-05   | 0.198149317 | 0.307966076 |
| cg08695113 | P4HA1;P4HA  | 10 | 0.03115363 | 0.128452217 | 0.317783726 |
| cg14492337 | P4HB        | 17 | 0.00415102 | 0.145953718 | 0.263393016 |
| cg17054691 | P4HB        | 17 | 0.00174397 | 0.297452562 | 0.408688846 |
| cg17462329 | P4HB        | 17 | 0.00152625 | 0.678233367 | 0.786924877 |
| cg20869369 | PABPC1L     | 20 | 0.00444406 | 0.385264    | 0.553812717 |
| cg08999742 | PABPN1L     | 16 | 0.01133402 | 0.465119935 | 0.572602404 |
| cg09428340 | PACRG;PACR  | 6  | 0.00740252 | 0.394895081 | 0.535350687 |
| cg26344026 | PACS1       | 11 | 0.00018977 | 0.414647268 | 0.627686028 |
| cg07521618 | PACS2;PACS2 | 14 | 0.00035539 | 0.303343542 | 0.487622324 |
| cg18374755 | PACS2;PACS2 | 14 | 0.00249942 | 0.457782673 | 0.599285715 |
| cg14063129 | PACS2;PACS2 | 14 | 0.00690636 | 0.125819982 | 0.251450317 |
| cg21170836 | PACS2;PACS2 | 14 | 0.00022997 | 0.483265453 | 0.603111638 |
| cg15483436 | PACS2;PACS2 | 14 | 0.00177791 | 0.512560425 | 0.630102862 |
| cg12158535 | PACS2;PACS2 | 14 | 0.003497   | 0.226679686 | 0.34189357  |
| cg16783764 | PACS2;PACS2 | 14 | 5.80E-05   | 0.617630111 | 0.730109098 |
| cg01052428 | PACS2;PACS2 | 14 | 0.00217478 | 0.243024583 | 0.350866529 |
| cg16162970 | PACS2;PACS2 | 14 | 0.01676524 | 0.175902263 | 0.278693969 |
| cg22908922 | PACS2;PACS2 | 14 | 0.00183991 | 0.533529038 | 0.633974316 |
| cg12397564 | PAFAH2      | 1  | 0.01441308 | 0.12785476  | 0.309844895 |

|            |              |    |            |             |             |
|------------|--------------|----|------------|-------------|-------------|
| cg17263916 | PAIP2;PAIP2; | 5  | 0.00241572 | 0.484967043 | 0.62764765  |
| cg06433132 | PAK4;PAK4;P  | 19 | 0.00462224 | 0.430820511 | 0.568922058 |
| cg24710020 | PAK4;PAK4;P  | 19 | 0.00487275 | 0.33717785  | 0.468250413 |
| cg14069287 | PALLD;PALLD  | 4  | 0.01758386 | 0.220923257 | 0.342113332 |
| cg05913684 | PALM;PALM    | 19 | 0.00211742 | 0.261551154 | 0.364571267 |
| cg21204870 | PALM2;PALM   | 9  | 0.00490262 | 0.583990927 | 0.75476742  |
| cg22911687 | PAM;PAM;P/   | 5  | 9.97E-05   | 0.560420522 | 0.813433534 |
| cg20655220 | PAM;PAM;P/   | 5  | 0.01853464 | 0.44163578  | 0.632652024 |
| cg17407629 | PAM;PAM;P/   | 5  | 0.03154962 | 0.356518809 | 0.511419494 |
| cg15007472 | PANX1        | 11 | 0.01860889 | 0.538799711 | 0.662135317 |
| cg16805189 | PANX1        | 11 | 0.03093899 | 0.567303618 | 0.679666533 |
| cg01641620 | PANX2;PANX   | 22 | 0.00082671 | 0.149876489 | 0.257755894 |
| cg21894762 | PAPLN        | 14 | 0.00197833 | 0.313463269 | 0.504828423 |
| cg17826980 | PAPPA2       | 1  | 0.0220894  | 0.296088843 | 0.433229139 |
| cg17691988 | PAPSS1       | 4  | 0.01790536 | 0.235167253 | 0.392039041 |
| cg26541780 | PAQR6;PAQF   | 1  | 0.00431366 | 0.226346465 | 0.361627089 |
| cg14150803 | PARK7;PARK   | 1  | 0.00561053 | 0.238885934 | 0.351678983 |
| cg04203587 | PARM1        | 4  | 0.03552624 | 0.424563111 | 0.550640008 |
| cg00734683 | PARP3;PARP:  | 3  | 0.0006316  | 0.672334953 | 0.791281276 |
| cg09712066 | PART1;PART:  | 5  | 0.01168639 | 0.121107389 | 0.2484301   |
| cg13518121 | PARVA        | 11 | 0.00701227 | 0.219296485 | 0.485140462 |
| cg16634971 | PARVA        | 11 | 0.00198558 | 0.248565239 | 0.455793333 |
| cg15123662 | PARVA        | 11 | 0.00042483 | 0.28028142  | 0.432185667 |
| cg05567628 | PARVA        | 11 | 0.03032853 | 0.416749905 | 0.554409414 |
| cg08647724 | PARVA        | 11 | 0.00685648 | 0.178330805 | 0.297119355 |
| cg13959831 | PAX5         | 9  | 0.03137725 | 0.153747495 | 0.295010211 |
| cg14293548 | PAX6;PAX6;P  | 11 | 0.02566294 | 0.593727041 | 0.710534869 |
| cg05923681 | PBRM1;PBRM   | 3  | 0.00284039 | 0.593074333 | 0.729193162 |
| cg14851325 | PBX2         | 6  | 0.00022924 | 0.645511579 | 0.750268376 |
| cg24676384 | PBXIP1       | 1  | 0.00636977 | 0.317180557 | 0.471721535 |
| cg15937861 | PC;PC;PC     | 11 | 0.00117306 | 0.261178864 | 0.476069178 |
| cg11194398 | PC;PC;PC     | 11 | 0.02614489 | 0.204136755 | 0.373889106 |
| cg15784784 | PC;PC;PC     | 11 | 0.00103822 | 0.599684303 | 0.723717122 |
| cg06467504 | PC;PC;PC     | 11 | 0.01776921 | 0.279333899 | 0.395672801 |
| cg23022313 | PC;PC;PC     | 11 | 0.00989552 | 0.197210601 | 0.313229984 |
| cg11525980 | PC;PC;PC     | 11 | 0.00467735 | 0.307139995 | 0.411430785 |
| cg06022884 | PCCB         | 3  | 0.00220026 | 0.52572917  | 0.681739265 |
| cg00160440 | PCDH10       | 4  | 0.00381517 | 0.341702957 | 0.556523665 |
| cg15585332 | PCDH9;PCDH   | 13 | 0.00641442 | 0.688957621 | 0.811723251 |
| cg04634417 | PCDHA6;PCD   | 5  | 0.00260003 | 0.593402593 | 0.789922404 |
| cg02560085 | PCDHA6;PCD   | 5  | 0.02797633 | 0.346821093 | 0.451758889 |
| cg07442271 | PCDHGA2;PC   | 5  | 0.00106511 | 0.345566888 | 0.464087276 |
| cg18869485 | PCDHGA4;PC   | 5  | 0.04914542 | 0.568293881 | 0.677755539 |
| cg15944367 | PCGF2        | 17 | 0.00551181 | 0.45054815  | 0.575785622 |
| cg02959939 | PCNT         | 21 | 0.00088306 | 0.176281462 | 0.292693961 |
| cg16056164 | PCNXL2       | 1  | 0.01240531 | 0.141936915 | 0.280411869 |



|            |                 |    |            |             |             |
|------------|-----------------|----|------------|-------------|-------------|
| cg09162148 | PCNXL3          | 11 | 0.00041927 | 0.775953293 | 0.877264153 |
| cg19685521 | PCOLCE          | 7  | 0.00216283 | 0.162437942 | 0.274547696 |
| cg01889899 | PCSK6;PCSK6     | 15 | 0.00746943 | 0.33535367  | 0.45932687  |
| cg12410980 | PCSK6;PCSK6     | 15 | 0.00509481 | 0.287023664 | 0.397745135 |
| cg04105230 | PCSK6;PCSK6     | 15 | 0.0278112  | 0.631630127 | 0.758717784 |
| cg06707286 | PCSK6;PCSK6     | 15 | 0.00691858 | 0.569046958 | 0.678818224 |
| cg19316405 | PDDC1           | 11 | 0.00040984 | 0.250915282 | 0.489702888 |
| cg10856894 | PDE10A;PDE10A   | 6  | 0.02213643 | 0.27173084  | 0.496662135 |
| cg05034374 | PDE11A;PDE11A   | 2  | 0.00031409 | 0.226042236 | 0.479442741 |
| cg05952572 | PDE2A;PDE2A     | 11 | 0.00043909 | 0.094621998 | 0.213483514 |
| cg05691871 | PDE4D;PDE4D     | 5  | 0.00535548 | 0.703700638 | 0.828482101 |
| cg13129833 | PDE4DIP         | 1  | 0.02380975 | 0.290809876 | 0.405128911 |
| cg25317315 | PDE4DIP;PDE4DIP | 1  | 0.00397011 | 0.298277822 | 0.454167811 |
| cg12271433 | PDE4DIP;PDE4DIP | 1  | 0.00339914 | 0.589169189 | 0.697879098 |
| cg27357918 | PDE6B;PDE6B     | 4  | 0.04844298 | 0.383378156 | 0.516082146 |
| cg00562118 | PDE6B;PDE6B     | 4  | 0.00122333 | 0.266097165 | 0.382120395 |
| cg25035101 | PDE6B;PDE6B     | 4  | 0.00036352 | 0.34824175  | 0.45504771  |
| cg10872815 | PDE7B           | 6  | 0.00623529 | 0.269469909 | 0.442992689 |
| cg18573082 | PDE7B           | 6  | 0.02378296 | 0.125532017 | 0.247184063 |
| cg24954977 | PDE8A;PDE8A     | 15 | 0.02477701 | 0.693082448 | 0.805285205 |
| cg22835523 | PDE8A;PDE8A     | 15 | 0.00572475 | 0.627681743 | 0.730042628 |
| cg08835985 | PDF;COG8        | 16 | 0.00032083 | 0.240578045 | 0.476622048 |
| cg06560282 | PDGFD;PDGFRB    | 11 | 0.00794701 | 0.782367569 | 0.890535129 |
| cg23496331 | PDGFRB          | 5  | 0.00652947 | 0.334931712 | 0.489366838 |
| cg12136274 | PDIA3P          | 1  | 0.0123921  | 0.145193222 | 0.24629642  |
| cg17493193 | PDIK1L;PDIK1L   | 1  | 0.0026328  | 0.205581984 | 0.327979113 |
| cg10093934 | PDK1            | 2  | 0.00490616 | 0.397548054 | 0.57793352  |
| cg20714347 | PDLIM1          | 10 | 0.00758886 | 0.351900045 | 0.520751044 |
| cg02637537 | PDLIM2;PDLIM2   | 8  | 0.00235146 | 0.17469231  | 0.297876722 |
| cg01463828 | PDLIM2;PDLIM2   | 8  | 0.00502534 | 0.337018964 | 0.444241903 |
| cg09125300 | PDLIM2;PDLIM2   | 8  | 0.03308879 | 0.219371779 | 0.326168114 |
| cg07262247 | PDLIM4;PDLIM4   | 5  | 0.00245392 | 0.252051844 | 0.381860321 |
| cg23976221 | PDLIM5;PDLIM5   | 4  | 0.01060803 | 0.184828158 | 0.355379044 |
| cg27650985 | PDLIM7;PDLIM7   | 5  | 0.01053858 | 0.497412204 | 0.616078319 |
| cg07034563 | PDLIM7;PDLIM7   | 5  | 0.00237678 | 0.210914129 | 0.376611657 |
| cg17037976 | PDLIM7;PDLIM7   | 5  | 0.00805303 | 0.283286791 | 0.402534333 |
| cg09972454 | PDXDC1          | 16 | 0.00512707 | 0.348841973 | 0.482737489 |
| cg14906976 | PDXK            | 21 | 0.00018944 | 0.176144856 | 0.368241376 |
| cg18410110 | PDZD2           | 5  | 0.01079077 | 0.225785738 | 0.359456955 |
| cg11565786 | PDZD2           | 5  | 0.00052942 | 0.684934058 | 0.800888969 |
| cg03880611 | PDZD2           | 5  | 0.01972496 | 0.439225115 | 0.543708455 |
| cg02529095 | PDZD7           | 10 | 0.00936875 | 0.445535116 | 0.594236606 |
| cg05593775 | PDZD7           | 10 | 0.00567527 | 0.14649581  | 0.270449791 |
| cg09437460 | PDZD8           | 10 | 0.04891278 | 0.390361401 | 0.530904486 |
| cg04418423 | PDZD8           | 10 | 0.00510006 | 0.766437162 | 0.867235445 |
| cg13019092 | PDZK1           | 1  | 0.00115876 | 0.323228391 | 0.505321015 |

|            |             |    |            |             |             |
|------------|-------------|----|------------|-------------|-------------|
| cg10321723 | PDZK1       | 1  | 0.00666379 | 0.217966689 | 0.321996777 |
| cg07810156 | PDZK1IP1;PD | 1  | 0.00107662 | 0.233341101 | 0.421877271 |
| cg13050115 | PDZRN3      | 3  | 0.00218698 | 0.44472673  | 0.688365723 |
| cg25688523 | PDZRN3      | 3  | 0.00111592 | 0.359769105 | 0.518422943 |
| cg12584826 | PDZRN3      | 3  | 0.00236784 | 0.410537142 | 0.54991182  |
| cg01826056 | PDZRN4;PDZ  | 12 | 0.00159391 | 0.508538931 | 0.614739379 |
| cg15534461 | PEBP1       | 12 | 0.00220131 | 0.396115073 | 0.55107882  |
| cg13521002 | PEBP4       | 8  | 0.00197437 | 0.426804251 | 0.603506682 |
| cg18050520 | PEBP4       | 8  | 0.0057728  | 0.155852674 | 0.316412501 |
| cg01966160 | PEBP4       | 8  | 0.00397745 | 0.368450412 | 0.498654565 |
| cg21932360 | PEBP4       | 8  | 0.01540913 | 0.504853702 | 0.613203358 |
| cg12085501 | PEG10;PEG10 | 7  | 0.01476051 | 0.180206134 | 0.291038885 |
| cg00388503 | PELI1       | 2  | 0.00028216 | 0.78408927  | 0.916816087 |
| cg21720802 | PELI3;PELI3 | 11 | 0.01487782 | 0.351948341 | 0.465047223 |
| cg01623663 | PELI3;PELI3 | 11 | 0.0132403  | 0.262772962 | 0.371190826 |
| cg10633334 | PEMT;PEMT   | 17 | 0.00175559 | 0.559526675 | 0.66095152  |
| cg25392325 | PEMT;PEMT;  | 17 | 0.00035355 | 0.261249294 | 0.458366614 |
| cg26177311 | PEMT;PEMT;  | 17 | 0.03577772 | 0.131969942 | 0.263129169 |
| cg12308675 | PER2        | 2  | 0.00035856 | 0.439248624 | 0.705395386 |
| cg22879834 | PER2        | 2  | 0.00257921 | 0.382731902 | 0.574777795 |
| cg07719617 | PER2        | 2  | 0.00195431 | 0.317871013 | 0.491388878 |
| cg24204951 | PER2        | 2  | 0.04686733 | 0.140205052 | 0.267151834 |
| cg09327610 | PER3        | 1  | 0.00689334 | 0.365253954 | 0.565823013 |
| cg25821223 | PERP        | 6  | 0.00539678 | 0.465806872 | 0.601929712 |
| cg26112622 | PEX10;PEX10 | 1  | 0.00534824 | 0.414383623 | 0.537890925 |
| cg24524895 | PEX11A      | 15 | 0.01015295 | 0.295375544 | 0.48887482  |
| cg22228613 | PEX12       | 17 | 0.03220005 | 0.46689231  | 0.607402991 |
| cg23463008 | PEX5L       | 3  | 0.01860304 | 0.712984003 | 0.829733156 |
| cg08500510 | PFKFB3      | 10 | 0.00088822 | 0.145909937 | 0.420381917 |
| cg03124510 | PFKFB3      | 10 | 0.00076368 | 0.169267204 | 0.439078027 |
| cg08745329 | PFKFB3      | 10 | 0.00435994 | 0.305133444 | 0.462932314 |
| cg08289056 | PFKFB3      | 10 | 0.01763515 | 0.571169142 | 0.69250885  |
| cg19084628 | PFKFB3;PFKF | 10 | 0.00124465 | 0.315547287 | 0.502942945 |
| cg07102808 | PFKFB3;PFKF | 10 | 0.0009872  | 0.263584683 | 0.44733719  |
| cg13782176 | PFKFB3;PFKF | 10 | 0.00038497 | 0.48982248  | 0.664387742 |
| cg00373371 | PFKFB3;PFKF | 10 | 0.00269344 | 0.444741373 | 0.555166262 |
| cg20732160 | PFKFB4      | 3  | 0.0004758  | 0.527605262 | 0.635610811 |
| cg09274658 | PFKL;PFKL   | 21 | 0.00092123 | 0.250351787 | 0.368425978 |
| cg04643920 | PFKL;PFKL   | 21 | 0.013121   | 0.24079508  | 0.355613833 |
| cg12265908 | PFKP        | 10 | 0.01129525 | 0.30795604  | 0.467562196 |
| cg12303582 | PFKP        | 10 | 0.00331497 | 0.221789365 | 0.357220374 |
| cg20520804 | PFKP        | 10 | 0.02117396 | 0.148398385 | 0.275358166 |
| cg15087907 | PFKP        | 10 | 0.00542507 | 0.178920545 | 0.303901198 |
| cg16324184 | PFKP        | 10 | 0.00208259 | 0.630063031 | 0.749802329 |
| cg25949033 | PFKP        | 10 | 0.00835648 | 0.176442421 | 0.295976206 |
| cg15228268 | PFKP        | 10 | 0.00040028 | 0.183969394 | 0.297695202 |

|            |              |    |            |             |             |
|------------|--------------|----|------------|-------------|-------------|
| cg16963373 | PFKP         | 10 | 0.00399012 | 0.374752643 | 0.487152643 |
| cg19416623 | PFKP         | 10 | 0.01056969 | 0.105555222 | 0.213428888 |
| cg23003961 | PFKP         | 10 | 0.02286214 | 0.707094128 | 0.809560297 |
| cg01287088 | PFN3         | 5  | 0.00142114 | 0.249881934 | 0.382535774 |
| cg27224809 | PGBD5        | 1  | 0.00189879 | 0.334132495 | 0.539963529 |
| cg05888583 | PGBD5        | 1  | 0.0018158  | 0.270674256 | 0.429138278 |
| cg21547054 | PGBD5        | 1  | 0.02407262 | 0.556939158 | 0.658406206 |
| cg04026948 | PGCP         | 8  | 0.0387066  | 0.22802562  | 0.423595103 |
| cg04839673 | PGM1         | 1  | 0.00196847 | 0.482844089 | 0.677101144 |
| cg03891302 | PHACTR1      | 6  | 0.01397733 | 0.620335778 | 0.782520489 |
| cg03338924 | PHACTR1      | 6  | 0.00224896 | 0.243400244 | 0.36424793  |
| cg08482167 | PHACTR2;PH   | 6  | 0.00763816 | 0.232173789 | 0.468718437 |
| cg17586302 | PHACTR2;PH   | 6  | 0.0048039  | 0.135238678 | 0.24044529  |
| cg13027965 | PHACTR2;PH   | 6  | 0.04665478 | 0.694357838 | 0.795935716 |
| cg24691891 | PHC2         | 1  | 0.02375631 | 0.18800976  | 0.36307078  |
| cg06953325 | PHC2         | 1  | 0.04151419 | 0.547117553 | 0.650291193 |
| cg00582531 | PHF15        | 5  | 0.00115842 | 0.585261379 | 0.710754438 |
| cg16220788 | PHF21A;PHF   | 11 | 0.02117123 | 0.226743771 | 0.426484494 |
| cg13471712 | PHF21A;PHF   | 11 | 0.00175815 | 0.495512907 | 0.604746142 |
| cg06058828 | PHF21A;PHF   | 11 | 0.01269386 | 0.746158186 | 0.848216167 |
| cg06763568 | PHGDH        | 1  | 0.00049048 | 0.321843729 | 0.47111816  |
| cg13740135 | PHLDB3       | 19 | 0.00180423 | 0.334191556 | 0.448168779 |
| cg05036615 | PHTF2;PHTF2  | 7  | 0.04576162 | 0.29825388  | 0.428140475 |
| cg13613439 | PHYHD1;PHY   | 9  | 0.01121466 | 0.391700906 | 0.557104477 |
| cg08641881 | PHYHIPL;PHY  | 10 | 0.02304947 | 0.261834066 | 0.364625539 |
| cg12083852 | PI4KB        | 1  | 0.00143371 | 0.330371858 | 0.469042066 |
| cg07926644 | PIAS4        | 19 | 0.00178145 | 0.310672514 | 0.491915963 |
| cg24200175 | PICALM;PICA  | 11 | 0.03317046 | 0.23085688  | 0.416122427 |
| cg16760049 | PICK1;PICK1; | 22 | 0.01772373 | 0.530569989 | 0.647820923 |
| cg09180702 | PIGQ;PIGQ    | 16 | 0.01979425 | 0.336558556 | 0.437938062 |
| cg24859236 | PIK3CD       | 1  | 0.00130336 | 0.181757918 | 0.323259907 |
| cg17725019 | PIK3IP1;PIK3 | 22 | 0.00126051 | 0.257195156 | 0.488192993 |
| cg09101894 | PIK3R1;PIK3F | 5  | 0.03318956 | 0.514757998 | 0.65286079  |
| cg01394255 | PIK3R5;PIK3F | 17 | 0.00102159 | 0.51699594  | 0.657907967 |
| cg17279125 | PIK3R6       | 17 | 0.00631667 | 0.326993053 | 0.432213584 |
| cg23009044 | PIK3R6       | 17 | 0.00625882 | 0.338638704 | 0.441254671 |
| cg17609282 | PION         | 7  | 0.00897819 | 0.712319348 | 0.843756    |
| cg11327029 | PIP4K2A      | 10 | 0.0008433  | 0.408894119 | 0.699371032 |
| cg19397801 | PIP4K2A      | 10 | 0.04909609 | 0.422156598 | 0.641572594 |
| cg13995193 | PIP5K1C      | 19 | 0.00024734 | 0.420641364 | 0.568108561 |
| cg08267629 | PIP5K1C      | 19 | 0.01180189 | 0.384336944 | 0.506739502 |
| cg19841005 | PIP5K1C      | 19 | 0.00032075 | 0.194876649 | 0.307238299 |
| cg12148647 | PIP5K1C      | 19 | 0.01622494 | 0.222713142 | 0.328685871 |
| cg04965671 | PISD         | 22 | 0.00394117 | 0.293481215 | 0.512815328 |
| cg07284476 | PITPNC1;PITF | 17 | 0.01239738 | 0.682715048 | 0.79778837  |
| cg04765955 | PITPNM1;PIT  | 11 | 0.00922791 | 0.571934225 | 0.693800608 |

|            |             |    |            |             |             |
|------------|-------------|----|------------|-------------|-------------|
| cg05399718 | PITPNM2     | 12 | 0.00017209 | 0.233432075 | 0.439962822 |
| cg13037550 | PITPNM2     | 12 | 0.00673893 | 0.59679273  | 0.731264187 |
| cg08464009 | PITPNM2     | 12 | 0.00718817 | 0.597054876 | 0.724539915 |
| cg15243578 | PITPNM2     | 12 | 0.00267387 | 0.184883165 | 0.28685347  |
| cg24389239 | PITPNM3;PIT | 17 | 0.00080256 | 0.637469276 | 0.741993983 |
| cg12020444 | PIWIL1      | 12 | 0.03194394 | 0.551922856 | 0.666458134 |
| cg16244664 | PIWIL1      | 12 | 0.04340753 | 0.680480751 | 0.782301528 |
| cg07036112 | PKD1;MIR12; | 16 | 0.00207303 | 0.556225351 | 0.749503803 |
| cg19949931 | PKD1;MIR12; | 16 | 0.03008269 | 0.411403151 | 0.576028337 |
| cg05598886 | PKD1;MIR12; | 16 | 7.61E-05   | 0.618702553 | 0.780348388 |
| cg03494430 | PKD1;PKD1   | 16 | 0.00046782 | 0.223629413 | 0.404884654 |
| cg27227497 | PKD1;PKD1   | 16 | 0.00688651 | 0.224665204 | 0.402936596 |
| cg07568117 | PKD1;PKD1   | 16 | 4.99E-05   | 0.661438146 | 0.804081001 |
| cg19584660 | PKD1;PKD1   | 16 | 0.01766792 | 0.303975011 | 0.4313795   |
| cg04623960 | PKD1;PKD1   | 16 | 0.00024734 | 0.591558465 | 0.699610127 |
| cg10731848 | PKD1L1      | 7  | 0.00395431 | 0.197606921 | 0.443643295 |
| cg27618305 | PKD1L1      | 7  | 0.00241324 | 0.14445019  | 0.277877096 |
| cg26283507 | PKD1L1      | 7  | 0.0054553  | 0.123764895 | 0.245382037 |
| cg02735620 | PKD2        | 4  | 0.0012897  | 0.46637367  | 0.683548086 |
| cg01995086 | PKHD1L1     | 8  | 0.0081852  | 0.695324836 | 0.842835952 |
| cg07565018 | PKM2;PKM2;  | 15 | 0.00448787 | 0.170501772 | 0.394924302 |
| cg02742281 | PKMYT1;PKM  | 16 | 3.61E-05   | 0.287337584 | 0.519562789 |
| cg01243773 | PKNOX2      | 11 | 0.00502422 | 0.193408249 | 0.383373035 |
| cg15727708 | PKNOX2      | 11 | 0.00012533 | 0.536350656 | 0.669756112 |
| cg13168187 | PKP4;PKP4   | 2  | 0.00052187 | 0.393800129 | 0.6266892   |
| cg13211559 | PLA2G2A;PLA | 1  | 0.00157992 | 0.349557947 | 0.528046294 |
| cg10993488 | PLA2G2A;PLA | 1  | 0.00613024 | 0.292859164 | 0.444381259 |
| cg02860199 | PLA2G2A;PLA | 1  | 0.01092412 | 0.477070189 | 0.62779274  |
| cg08235413 | PLA2G2A;PLA | 1  | 0.03081531 | 0.382624027 | 0.507831344 |
| cg11037787 | PLA2G2A;PLA | 1  | 0.0331483  | 0.384891223 | 0.49891937  |
| cg02203881 | PLA2G4D     | 15 | 0.01697585 | 0.318152903 | 0.427284588 |
| cg23120601 | PLCB2       | 15 | 9.51E-05   | 0.217447151 | 0.383592574 |
| cg09233429 | PLCB2       | 15 | 0.00015929 | 0.243432065 | 0.393579929 |
| cg20484832 | PLCB4;PLCB4 | 20 | 0.00630191 | 0.754200663 | 0.859648948 |
| cg24736099 | PLCB4;PLCB4 | 20 | 0.02350239 | 0.761821503 | 0.867020162 |
| cg03302386 | PLCD1       | 3  | 7.14E-05   | 0.26488259  | 0.381895427 |
| cg12705340 | PLCD1       | 3  | 0.00414073 | 0.277860655 | 0.394618635 |
| cg27638309 | PLCE1;PLCE1 | 10 | 0.01663109 | 0.256235996 | 0.460510331 |
| cg00940248 | PLCG2       | 16 | 0.02078415 | 0.252912847 | 0.419510821 |
| cg12611897 | PLCH1;PLCH1 | 3  | 0.01450299 | 0.643256311 | 0.809666741 |
| cg21767191 | PLCL2;PLCL2 | 3  | 0.00493617 | 0.675122961 | 0.803697798 |
| cg15329866 | PLD1;PLD1   | 3  | 0.04997407 | 0.293973431 | 0.441284363 |
| cg27302507 | PLD4        | 14 | 0.00095345 | 0.317661775 | 0.434637715 |
| cg24578857 | PLD6        | 17 | 0.00519026 | 0.151661767 | 0.277152718 |
| cg17082405 | PLEC1;PLEC1 | 8  | 0.01190904 | 0.106557615 | 0.283001111 |
| cg20680163 | PLEC1;PLEC1 | 8  | 0.01189288 | 0.137284143 | 0.290823023 |

|            |             |    |            |             |             |
|------------|-------------|----|------------|-------------|-------------|
| cg02681842 | PLEC1;PLEC1 | 8  | 0.01239542 | 0.16014403  | 0.310763402 |
| cg07598407 | PLEC1;PLEC1 | 8  | 0.00647789 | 0.302330867 | 0.431155919 |
| cg23155717 | PLEC1;PLEC1 | 8  | 0.00090174 | 0.267796585 | 0.384467178 |
| cg05141333 | PLEC1;PLEC1 | 8  | 0.00667285 | 0.50031029  | 0.608101936 |
| cg24137216 | PLEC1;PLEC1 | 8  | 0.00142847 | 0.246210858 | 0.396222347 |
| cg03537810 | PLEC1;PLEC1 | 8  | 0.0007411  | 0.360196995 | 0.478120446 |
| cg07132086 | PLEKHA2     | 8  | 0.01431423 | 0.252529792 | 0.419496708 |
| cg08077345 | PLEKHA4;PLE | 19 | 0.01837552 | 0.159219504 | 0.276937234 |
| cg19755459 | PLEKHA5;PLE | 12 | 0.0428373  | 0.341862643 | 0.463193054 |
| cg03127388 | PLEKHA6     | 1  | 0.01667524 | 0.444249029 | 0.577329154 |
| cg11131599 | PLEKHA6     | 1  | 0.03570641 | 0.543233664 | 0.660169509 |
| cg15306794 | PLEKHA7     | 11 | 0.01073628 | 0.385944135 | 0.564306043 |
| cg07273003 | PLEKHA7     | 11 | 0.02442495 | 0.25544056  | 0.378562476 |
| cg08445687 | PLEKHF1     | 19 | 0.00261428 | 0.18168193  | 0.36088531  |
| cg22309568 | PLEKHF1     | 19 | 0.00339608 | 0.272201999 | 0.423820652 |
| cg01595505 | PLEKHG2     | 19 | 0.0007684  | 0.656573718 | 0.760541276 |
| cg11802553 | PLEKHG3     | 14 | 0.00048601 | 0.400703511 | 0.563474961 |
| cg12063688 | PLEKHG3     | 14 | 0.00674812 | 0.156743129 | 0.306624207 |
| cg07942500 | PLEKHG3     | 14 | 0.00474778 | 0.16061916  | 0.300055273 |
| cg06426253 | PLEKHG4;PLE | 16 | 0.00031984 | 0.649453011 | 0.77663117  |
| cg09805709 | PLEKHG5;PLE | 1  | 0.00218905 | 0.420675442 | 0.539484035 |
| cg26232945 | PLEKHM3     | 2  | 0.00529773 | 0.198344384 | 0.400111144 |
| cg02815014 | PLEKHM3     | 2  | 0.00042068 | 0.574570222 | 0.758547226 |
| cg18686270 | PLSCR1      | 3  | 0.03166368 | 0.66822237  | 0.780006101 |
| cg19431623 | PLXDC2      | 10 | 0.00052678 | 0.379634258 | 0.586392789 |
| cg03631457 | PLXDC2      | 10 | 0.00729142 | 0.491259989 | 0.656287717 |
| cg12723985 | PLXDC2      | 10 | 0.0039112  | 0.416625733 | 0.574176534 |
| cg24161018 | PLXNA4      | 7  | 0.00100161 | 0.471662446 | 0.687645706 |
| cg11602148 | PLXNB1;PLXN | 3  | 0.00029105 | 0.484621671 | 0.721143403 |
| cg09837648 | PLXNB1;PLXN | 3  | 0.00096211 | 0.344987182 | 0.532157088 |
| cg16357930 | PLXNB1;PLXN | 3  | 0.00055323 | 0.362175164 | 0.535861815 |
| cg12069042 | PLXNB1;PLXN | 3  | 0.00897974 | 0.131707425 | 0.248356721 |
| cg11106331 | PLXNB2      | 22 | 0.0010134  | 0.735506724 | 0.876978308 |
| cg27206976 | PLXNB2      | 22 | 0.00700216 | 0.312594283 | 0.443207934 |
| cg10698910 | PLXNB2      | 22 | 0.00661379 | 0.395435357 | 0.507755059 |
| cg21509385 | PLXNB2      | 22 | 0.01600822 | 0.65225984  | 0.757293785 |
| cg12349580 | PLXNC1      | 12 | 0.00242626 | 0.400977012 | 0.565380977 |
| cg07078269 | PLXND1      | 3  | 0.00305772 | 0.428659843 | 0.644609713 |
| cg27353085 | PLXND1      | 3  | 0.00247659 | 0.304065253 | 0.514199279 |
| cg05490233 | PLXND1      | 3  | 0.00174448 | 0.423921578 | 0.560134515 |
| cg07908223 | PMEPA1;PMI  | 20 | 0.00248881 | 0.359300409 | 0.565903162 |
| cg05355067 | PMEPA1;PMI  | 20 | 0.00112537 | 0.199975851 | 0.370210199 |
| cg00177431 | PMEPA1;PMI  | 20 | 0.03812884 | 0.191518949 | 0.34762048  |
| cg13473184 | PMVK        | 1  | 0.02412349 | 0.147803345 | 0.270669258 |
| cg13835894 | PNKD;TMBIN  | 2  | 4.33E-05   | 0.251073772 | 0.35995327  |
| cg24025538 | PNKP        | 19 | 0.00270417 | 0.226144224 | 0.350253811 |

|            |              |    |            |             |             |
|------------|--------------|----|------------|-------------|-------------|
| cg07584631 | PNKP         | 19 | 0.0035779  | 0.613044276 | 0.718468856 |
| cg08580014 | PNLIPRP1     | 10 | 0.01069662 | 0.213085413 | 0.320605498 |
| cg11858564 | PNMA1;C14c   | 14 | 0.02408684 | 0.649470341 | 0.776936757 |
| cg27178772 | PNRC1        | 6  | 0.0006778  | 0.360518931 | 0.528783246 |
| cg14522034 | POFUT2;POF   | 21 | 0.00047626 | 0.164919939 | 0.28809863  |
| cg03515060 | POFUT2;POF   | 21 | 0.0420572  | 0.624982667 | 0.72935789  |
| cg23694811 | POGK         | 1  | 0.04137967 | 0.411051994 | 0.52342575  |
| cg01444413 | POGZ;POGZ;l  | 1  | 0.00818325 | 0.576248875 | 0.713622315 |
| cg07274204 | POL3S        | 16 | 0.00025542 | 0.355933306 | 0.561490442 |
| cg03581660 | POL3S        | 16 | 0.01955896 | 0.361616912 | 0.511123693 |
| cg27197524 | POLE         | 12 | 0.00030682 | 0.571555884 | 0.798319941 |
| cg20361429 | POLE         | 12 | 0.00014523 | 0.575709625 | 0.794512944 |
| cg16956999 | POLE         | 12 | 0.00439239 | 0.610983075 | 0.739612359 |
| cg26975812 | POLE         | 12 | 0.00268796 | 0.804675099 | 0.932553035 |
| cg24940701 | POLR2E       | 19 | 0.00028216 | 0.704968878 | 0.830341891 |
| cg00607154 | POLS         | 5  | 0.01251065 | 0.598541919 | 0.756010844 |
| cg10888644 | POLS         | 5  | 0.04292884 | 0.449952908 | 0.551519543 |
| cg13859108 | POM121C      | 7  | 0.0010109  | 0.236890477 | 0.456390493 |
| cg23809645 | POMC;POMC    | 2  | 0.03867703 | 0.441541228 | 0.548372865 |
| cg04089800 | POMGNT1;P    | 1  | 0.03216454 | 0.138981348 | 0.27364598  |
| cg06857473 | POMT2        | 14 | 0.04209807 | 0.166211662 | 0.282986754 |
| cg04270402 | PON2;PON2    | 7  | 0.00607069 | 0.444122223 | 0.555264962 |
| cg25923345 | POP7         | 7  | 0.00645229 | 0.21900832  | 0.321605753 |
| cg09682986 | POT1;POT1;F  | 7  | 0.03320117 | 0.74099777  | 0.86480105  |
| cg26969150 | POTEA;POTE   | 8  | 0.00159597 | 0.658167811 | 0.898317171 |
| cg05790989 | POU2F1       | 1  | 0.04104522 | 0.561007674 | 0.661453892 |
| cg18397073 | POU2F2       | 19 | 0.00219918 | 0.193057399 | 0.356358624 |
| cg16713265 | POU5F1       | 6  | 0.00262805 | 0.662004436 | 0.771854612 |
| cg17469359 | POU6F2;POU   | 7  | 0.00689651 | 0.214062141 | 0.36140486  |
| cg11253804 | PPAN-P2RY1   | 19 | 0.01229094 | 0.526013816 | 0.634191962 |
| cg00126995 | PPAP2A;PPAI  | 5  | 0.04001862 | 0.655511557 | 0.815712276 |
| cg27398401 | PPAP2B;PPAI  | 1  | 0.04364099 | 0.246667571 | 0.367262411 |
| cg11682697 | PPAP2B;PPAI  | 1  | 0.02526149 | 0.099517522 | 0.206227274 |
| cg15896446 | PPAPDC1A     | 10 | 0.01093528 | 0.452994333 | 0.599566031 |
| cg13436417 | PPAPDC1A     | 10 | 0.00709268 | 0.26835802  | 0.384055202 |
| cg21286173 | PPAPDC1B     | 8  | 0.00385135 | 0.234396501 | 0.461366652 |
| cg15202104 | PPBPL1       | 4  | 0.00447989 | 0.63460916  | 0.780311071 |
| cg22185879 | PPDPF        | 20 | 0.00130742 | 0.227236389 | 0.360823627 |
| cg21642947 | PPDPF        | 20 | 0.01268286 | 0.198144275 | 0.311030917 |
| cg12652780 | PPFIA1;PPFIA | 11 | 0.01332706 | 0.25446915  | 0.400521193 |
| cg24000087 | PPFIA4;PPFIA | 1  | 0.00557789 | 0.340790981 | 0.492505154 |
| cg10952234 | PPFIA4;PPFIA | 1  | 0.0020996  | 0.40476955  | 0.545143343 |
| cg20095669 | PPFIBP1;PPFI | 12 | 0.01007809 | 0.474231523 | 0.645281551 |
| cg12166080 | PPFIBP1;PPFI | 12 | 0.00104901 | 0.760148824 | 0.864298796 |
| cg06145800 | PPL          | 16 | 0.01052981 | 0.245582663 | 0.346478578 |
| cg02765693 | PPM1E        | 17 | 0.01260763 | 0.640016898 | 0.761049219 |

|            |             |    |            |             |             |
|------------|-------------|----|------------|-------------|-------------|
| cg13963807 | PPP1CA;PPP1 | 11 | 0.01327762 | 0.315471011 | 0.43115695  |
| cg04375036 | PPP1CC      | 12 | 0.00017209 | 0.286476418 | 0.436557909 |
| cg26058884 | PPP1R10     | 6  | 0.00582591 | 0.194432672 | 0.3847053   |
| cg12069151 | PPP1R10     | 6  | 0.04280029 | 0.147679786 | 0.303396962 |
| cg03596877 | PPP1R10     | 6  | 0.04664557 | 0.421889543 | 0.529552944 |
| cg04737350 | PPP1R12A;PF | 12 | 0.00342117 | 0.627041907 | 0.772407139 |
| cg26348803 | PPP1R12B;PF | 1  | 0.03110087 | 0.146247614 | 0.267356132 |
| cg08067969 | PPP1R13B    | 14 | 0.00273745 | 0.34332892  | 0.55380688  |
| cg13745946 | PPP1R13B    | 14 | 0.00593996 | 0.226129465 | 0.376926632 |
| cg06398396 | PPP1R16A    | 8  | 0.00016424 | 0.34928206  | 0.459180607 |
| cg16928551 | PPP1R2P1    | 6  | 0.04573891 | 0.632590185 | 0.784334921 |
| cg24288527 | PPP1R3C     | 10 | 0.00180584 | 0.192355428 | 0.331541266 |
| cg08447992 | PPP1R3C     | 10 | 0.01428572 | 0.147395211 | 0.267886059 |
| cg13686739 | PPP1R9B     | 17 | 0.01544883 | 0.127931956 | 0.280189307 |
| cg25409308 | PPP2R1B     | 11 | 0.0120018  | 0.525856966 | 0.64638083  |
| cg03958058 | PPP2R2D;PPI | 10 | 0.0249264  | 0.539582546 | 0.847412459 |
| cg02265810 | PPP2R2D;PPI | 10 | 0.0007719  | 0.464840231 | 0.712582473 |
| cg03072003 | PPP2R2D;PPI | 10 | 0.00153278 | 0.246852174 | 0.387249809 |
| cg12789488 | PPP2R2D;PPI | 10 | 0.0385463  | 0.358442502 | 0.485860523 |
| cg15102070 | PPP2R2D;PPI | 10 | 0.00419684 | 0.56914596  | 0.690914768 |
| cg15444217 | PPP2R2D;PPI | 10 | 0.03860252 | 0.630226983 | 0.747420304 |
| cg23941394 | PPP2R2D;PPI | 10 | 0.02100181 | 0.116468027 | 0.218779597 |
| cg27161702 | PPP2R5C;PPI | 14 | 0.00176668 | 0.576090213 | 0.698342918 |
| cg02327001 | PPP3CA;PPP3 | 4  | 0.00232455 | 0.719042702 | 0.840605167 |
| cg23399933 | PPP3CA;PPP3 | 4  | 0.00936793 | 0.754294695 | 0.869704607 |
| cg13845634 | PPY         | 17 | 0.00979121 | 0.530249324 | 0.640730845 |
| cg02710481 | PQLC1;PQLC2 | 18 | 0.00052921 | 0.188494858 | 0.385967247 |
| cg19733740 | PRCP;PRCP   | 11 | 0.03928653 | 0.38448007  | 0.525333719 |
| cg13448468 | PRDM11      | 11 | 0.00260757 | 0.251926509 | 0.398759144 |
| cg00328729 | PRDM11      | 11 | 0.02599643 | 0.239710438 | 0.358953398 |
| cg22497969 | PRDM16;PRC  | 1  | 0.00059935 | 0.13544416  | 0.346160699 |
| cg25153629 | PRDM16;PRC  | 1  | 0.00037711 | 0.424141086 | 0.627696251 |
| cg06911744 | PRDM16;PRC  | 1  | 0.00057818 | 0.334476475 | 0.52179361  |
| cg15619820 | PRDM16;PRC  | 1  | 0.0001917  | 0.248630402 | 0.43352123  |
| cg11392550 | PRDM16;PRC  | 1  | 0.02028056 | 0.251676594 | 0.434268682 |
| cg04855369 | PRDM16;PRC  | 1  | 0.00031984 | 0.242073735 | 0.418469576 |
| cg22720392 | PRDM16;PRC  | 1  | 0.0001951  | 0.214515079 | 0.384542055 |
| cg17601209 | PRDM16;PRC  | 1  | 0.00756735 | 0.347272081 | 0.503564732 |
| cg14712575 | PRDM16;PRC  | 1  | 0.00062114 | 0.473621667 | 0.628850215 |
| cg08160128 | PRDM16;PRC  | 1  | 0.02180777 | 0.514903383 | 0.667299252 |
| cg00894041 | PRDM16;PRC  | 1  | 0.00361561 | 0.207024218 | 0.339321219 |
| cg11710123 | PRDM16;PRC  | 1  | 0.00143749 | 0.2830376   | 0.406988004 |
| cg19263228 | PRDM16;PRC  | 1  | 0.00901603 | 0.191146899 | 0.313477192 |
| cg16546658 | PRDM16;PRC  | 1  | 0.00072123 | 0.194835198 | 0.315078445 |
| cg26520908 | PRDM16;PRC  | 1  | 0.00739403 | 0.229862224 | 0.342921327 |
| cg11138362 | PRDM16;PRC  | 1  | 0.00678052 | 0.21303259  | 0.317576227 |

|            |             |    |            |             |             |
|------------|-------------|----|------------|-------------|-------------|
| cg11251399 | PRDM16;PRC  | 1  | 0.04411529 | 0.579996257 | 0.682329978 |
| cg19644991 | PRDM6       | 5  | 0.04810034 | 0.518384206 | 0.666158881 |
| cg26938014 | PRDM6       | 5  | 0.03019911 | 0.494354432 | 0.634388842 |
| cg03311556 | PRDM8       | 4  | 0.0103284  | 0.390709209 | 0.595666161 |
| cg06440348 | PRDM8       | 4  | 0.00152622 | 0.34973729  | 0.509558803 |
| cg01789499 | PRDM8       | 4  | 0.00230751 | 0.175167489 | 0.296138468 |
| cg09595050 | PRDM8       | 4  | 0.00147804 | 0.37980235  | 0.495143767 |
| cg02732915 | PRDM8;PRDI  | 4  | 0.02819008 | 0.522149812 | 0.678866821 |
| cg05522011 | PRDM8;PRDI  | 4  | 0.00570534 | 0.421051915 | 0.572306735 |
| cg00138041 | PRDM8;PRDI  | 4  | 0.00578045 | 0.27260577  | 0.415553193 |
| cg05452645 | PRDM8;PRDI  | 4  | 0.00831928 | 0.297082662 | 0.437457854 |
| cg10880006 | PRDM8;PRDI  | 4  | 0.02750104 | 0.19904443  | 0.336641523 |
| cg19409579 | PRDM8;PRDI  | 4  | 0.00274669 | 0.125706465 | 0.244900567 |
| cg11388320 | PRDM8;PRDI  | 4  | 0.00542501 | 0.282307079 | 0.383248494 |
| cg06989253 | PRDX1;PRDX  | 1  | 0.01371882 | 0.162167729 | 0.292474971 |
| cg19752143 | PREPL;PREPL | 2  | 0.03023244 | 0.341435768 | 0.492260854 |
| cg00555268 | PRIC285     | 20 | 0.01669552 | 0.286961832 | 0.413056686 |
| cg04643397 | PRKAB1      | 12 | 0.00878496 | 0.281368656 | 0.468968192 |
| cg03190018 | PRKAG2;PRK. | 7  | 7.39E-05   | 0.288594277 | 0.54207298  |
| cg27577993 | PRKAG2;PRK. | 7  | 0.00622348 | 0.189734442 | 0.41684137  |
| cg26284782 | PRKAG2;PRK. | 7  | 0.00022816 | 0.22418755  | 0.41963435  |
| cg22719878 | PRKAG2;PRK. | 7  | 0.00057266 | 0.442546981 | 0.595775879 |
| cg26482626 | PRKAG2;PRK. | 7  | 0.0038042  | 0.436459825 | 0.579649032 |
| cg17814717 | PRKAG2;PRK. | 7  | 0.00324739 | 0.284412575 | 0.42467355  |
| cg14838600 | PRKAG2;PRK. | 7  | 0.00689763 | 0.189317675 | 0.322736084 |
| cg09397579 | PRKAG2;PRK. | 7  | 0.00029687 | 0.222957662 | 0.351726005 |
| cg16581738 | PRKAR1B;PRI | 7  | 0.00013108 | 0.503686035 | 0.743354705 |
| cg11315991 | PRKAR1B;PRI | 7  | 0.01561989 | 0.418307241 | 0.601492226 |
| cg04191989 | PRKAR1B;PRI | 7  | 0.00067691 | 0.242550704 | 0.41711043  |
| cg03719152 | PRKAR1B;PRI | 7  | 0.01367106 | 0.17148709  | 0.345782649 |
| cg06878741 | PRKAR1B;PRI | 7  | 0.00814167 | 0.341226426 | 0.515143601 |
| cg27418434 | PRKAR1B;PRI | 7  | 0.00018977 | 0.317560117 | 0.482751305 |
| cg21150288 | PRKAR1B;PRI | 7  | 0.00335356 | 0.534155765 | 0.678809112 |
| cg06413196 | PRKAR1B;PRI | 7  | 0.02322263 | 0.160280548 | 0.303119129 |
| cg04666346 | PRKAR1B;PRI | 7  | 0.03386773 | 0.18863967  | 0.32936638  |
| cg18241094 | PRKAR1B;PRI | 7  | 0.01362292 | 0.228496135 | 0.365584468 |
| cg10127554 | PRKAR1B;PRI | 7  | 0.00054359 | 0.51923525  | 0.648900863 |
| cg18463891 | PRKAR1B;PRI | 7  | 0.00146776 | 0.601511933 | 0.715261153 |
| cg12125484 | PRKAR1B;PRI | 7  | 0.03256597 | 0.241029542 | 0.350441073 |
| cg01462184 | PRKAR1B;PRI | 7  | 0.00278951 | 0.132214845 | 0.233588061 |
| cg08613122 | PRKAR1B;PRI | 7  | 0.00364202 | 0.170098635 | 0.270315092 |
| cg18950779 | PRKCA       | 17 | 0.02621259 | 0.352369334 | 0.633132663 |
| cg09655520 | PRKCA       | 17 | 4.07E-05   | 0.469055441 | 0.726530107 |
| cg02699518 | PRKCA       | 17 | 0.00221502 | 0.447402223 | 0.660382739 |
| cg19325477 | PRKCA       | 17 | 0.00565578 | 0.554583709 | 0.763313301 |
| cg17202839 | PRKCA       | 17 | 0.00967131 | 0.709584358 | 0.861248246 |



|            |             |    |            |             |             |
|------------|-------------|----|------------|-------------|-------------|
| cg00498360 | PRKCA       | 17 | 0.00870467 | 0.390145242 | 0.53893151  |
| cg19474267 | PRKCA       | 17 | 0.04186752 | 0.144308313 | 0.281787142 |
| cg14343701 | PRKCA       | 17 | 0.00219366 | 0.155231889 | 0.2705289   |
| cg22632947 | PRKCA       | 17 | 0.03943729 | 0.416245224 | 0.528894077 |
| cg10460643 | PRKCD;PRKCI | 3  | 0.00027163 | 0.405533768 | 0.563666051 |
| cg12229151 | PRKCDBP     | 11 | 0.00809663 | 0.153440974 | 0.269827343 |
| cg24545602 | PRKCE       | 2  | 0.01179044 | 0.270469402 | 0.46023881  |
| cg00409434 | PRKCE       | 2  | 0.00577243 | 0.420431749 | 0.593122506 |
| cg15505219 | PRKCH       | 14 | 0.00337797 | 0.387686444 | 0.571966551 |
| cg17355877 | PRKCZ       | 1  | 0.02010866 | 0.686218576 | 0.821217719 |
| cg24447775 | PRKCZ       | 1  | 0.01217745 | 0.438564245 | 0.548185555 |
| cg06176608 | PRKCZ;PRKCZ | 1  | 0.00915775 | 0.373817757 | 0.497049107 |
| cg20153240 | PRKCZ;PRKCZ | 1  | 0.0028997  | 0.465490071 | 0.584571417 |
| cg02840585 | PRKCZ;PRKCZ | 1  | 0.00029766 | 0.48095678  | 0.689867601 |
| cg22128985 | PRKCZ;PRKCZ | 1  | 0.00039943 | 0.361417398 | 0.546523864 |
| cg00409816 | PRKCZ;PRKCZ | 1  | 6.59E-05   | 0.582075037 | 0.765989314 |
| cg17156349 | PRKCZ;PRKCZ | 1  | 0.0096831  | 0.297983525 | 0.479142691 |
| cg25727019 | PRKCZ;PRKCZ | 1  | 0.00883311 | 0.383867804 | 0.55092404  |
| cg00866690 | PRKCZ;PRKCZ | 1  | 0.0005273  | 0.313848583 | 0.46851057  |
| cg09179248 | PRKCZ;PRKCZ | 1  | 0.00223896 | 0.242018606 | 0.388447545 |
| cg07836663 | PRKCZ;PRKCZ | 1  | 0.00050351 | 0.362897458 | 0.488507921 |
| cg00981070 | PRKCZ;PRKCZ | 1  | 0.00477308 | 0.322089101 | 0.445139855 |
| cg00175702 | PRKCZ;PRKCZ | 1  | 0.00657201 | 0.345063062 | 0.467897515 |
| cg07896009 | PRKCZ;PRKCZ | 1  | 0.02739866 | 0.574484897 | 0.682879855 |
| cg24578937 | PRKCZ;PRKCZ | 1  | 0.03325862 | 0.158483315 | 0.26066915  |
| cg22338356 | PRKDC;PRKD  | 8  | 0.01541982 | 0.182035518 | 0.353722734 |
| cg15121267 | PRL;PRL     | 6  | 0.00132416 | 0.348553187 | 0.518415337 |
| cg11705975 | PRLHR       | 10 | 0.0010483  | 0.188280638 | 0.328714975 |
| cg01456572 | PRM3        | 16 | 0.00401483 | 0.319864168 | 0.445778699 |
| cg08358964 | PRM3        | 16 | 0.03594974 | 0.19809485  | 0.32354819  |
| cg00346180 | PRMT1;PRM1  | 19 | 0.00380455 | 0.489984413 | 0.596611612 |
| cg08162865 | PRMT10      | 4  | 0.0094032  | 0.587632866 | 0.758906315 |
| cg24775940 | PRMT10      | 4  | 0.00160547 | 0.38921333  | 0.492106978 |
| cg22799510 | PROK2;PROK  | 3  | 0.02862284 | 0.48711212  | 0.659123585 |
| cg10959048 | PROS1       | 3  | 0.00115876 | 0.442549256 | 0.636066672 |
| cg22800590 | PROX1       | 1  | 0.00802145 | 0.418166091 | 0.565429282 |
| cg25734864 | PROZ        | 13 | 0.00102456 | 0.536307561 | 0.664145866 |
| cg23800587 | PROZ        | 13 | 0.00138644 | 0.539013425 | 0.659797903 |
| cg05165862 | PRPF40B;PRF | 12 | 0.00851079 | 0.211171185 | 0.31205207  |
| cg12459923 | PRPF6       | 20 | 3.77E-05   | 0.301979823 | 0.603769595 |
| cg11167993 | PRPF6       | 20 | 0.00019392 | 0.496143855 | 0.781980336 |
| cg13323866 | PRR12       | 19 | 0.0162884  | 0.736690298 | 0.853920987 |
| cg12155028 | PRR16       | 5  | 0.0056349  | 0.413702693 | 0.585774249 |
| cg26995244 | PRR5;PRR5;P | 22 | 0.01090506 | 0.119883067 | 0.222382341 |
| cg08790638 | PRR5L;PRR5L | 11 | 0.00467192 | 0.605516465 | 0.711847237 |
| cg20266593 | PRRT1       | 6  | 0.00052921 | 0.262607454 | 0.496424471 |

|            |             |    |            |             |             |
|------------|-------------|----|------------|-------------|-------------|
| cg08123207 | PRRT1       | 6  | 8.60E-05   | 0.217947793 | 0.394355501 |
| cg16040614 | PRRT1       | 6  | 0.00068434 | 0.35046664  | 0.509493568 |
| cg19227031 | PRRT1       | 6  | 0.00039987 | 0.281981876 | 0.418298602 |
| cg22849665 | PRRT1       | 6  | 0.02327258 | 0.13237641  | 0.237274761 |
| cg05764839 | PRRT1       | 6  | 0.00158387 | 0.126476095 | 0.227148289 |
| cg01943851 | PRRT2       | 16 | 0.00129139 | 0.70530172  | 0.842885412 |
| cg26647566 | PRSS12      | 4  | 0.02186618 | 0.174847732 | 0.275193582 |
| cg04149015 | PRSS36      | 16 | 0.0013379  | 0.165642661 | 0.282581755 |
| cg04797061 | PRSS36      | 16 | 0.00241097 | 0.334385023 | 0.436402658 |
| cg20094462 | PRTN3       | 19 | 0.00141026 | 0.097869182 | 0.214924519 |
| cg13579473 | PSD3        | 8  | 0.02228887 | 0.449971745 | 0.608723486 |
| cg24804106 | PSD3        | 8  | 0.00870659 | 0.686877334 | 0.792588591 |
| cg09894683 | PSD3;PSD3   | 8  | 0.0474703  | 0.236527354 | 0.39374514  |
| cg13717374 | PSMC4;PSMC  | 19 | 0.00994401 | 0.635429323 | 0.735624371 |
| cg03172765 | PSMD1       | 2  | 0.01693549 | 0.511100173 | 0.703049527 |
| cg05989984 | PSMD9;WDR   | 12 | 0.02759073 | 0.576015342 | 0.74489632  |
| cg17357561 | PTBP1;PTBP1 | 19 | 0.00847987 | 0.287393108 | 0.482034099 |
| cg02086742 | PTBP1;PTBP1 | 19 | 0.00181611 | 0.62034762  | 0.810708052 |
| cg01025800 | PTBP1;PTBP1 | 19 | 0.00613289 | 0.541534649 | 0.692079584 |
| cg15077193 | PTBP1;PTBP1 | 19 | 0.01445403 | 0.132200035 | 0.268146851 |
| cg00999243 | PTBP1;PTBP1 | 19 | 0.04711349 | 0.469032589 | 0.58212994  |
| cg16656493 | PTCRA       | 6  | 0.00057145 | 0.385341885 | 0.520909397 |
| cg14914552 | PTDSS1      | 8  | 0.0021829  | 0.530605729 | 0.703243321 |
| cg24862548 | PTDSS1      | 8  | 0.00073359 | 0.523158738 | 0.662609745 |
| cg09096671 | PTDSS1      | 8  | 0.00016457 | 0.256916724 | 0.393639564 |
| cg12813802 | PTDSS1      | 8  | 0.01437541 | 0.524406392 | 0.638278197 |
| cg21909859 | PTDSS1      | 8  | 0.00526261 | 0.133817152 | 0.245259022 |
| cg10575846 | PTDSS2      | 11 | 0.00024559 | 0.449083889 | 0.65592988  |
| cg08251761 | PTDSS2      | 11 | 0.00090948 | 0.399911302 | 0.569388338 |
| cg17005222 | PTDSS2      | 11 | 0.00824491 | 0.481436909 | 0.628183746 |
| cg21075020 | PTDSS2      | 11 | 0.0003561  | 0.60884332  | 0.722712287 |
| cg15751198 | PTDSS2      | 11 | 0.00769848 | 0.683407929 | 0.794175685 |
| cg12603671 | PTGER3;PTGI | 1  | 0.0414141  | 0.132386364 | 0.276399513 |
| cg01311102 | PTGES2;PTGI | 9  | 0.02676974 | 0.481552191 | 0.594249643 |
| cg04041000 | PTH1R       | 3  | 0.00195452 | 0.399565673 | 0.634264949 |
| cg18707417 | PTH1R       | 3  | 0.00077796 | 0.305765762 | 0.469342803 |
| cg17378686 | PTH1R       | 3  | 0.00722524 | 0.124735    | 0.226459313 |
| cg07515250 | PTK2;PTK2   | 8  | 0.02069083 | 0.650088085 | 0.758903399 |
| cg00658161 | PTK2B;PTK2E | 8  | 0.00416419 | 0.402201045 | 0.535614133 |
| cg07235774 | PTK7;PTK7;P | 6  | 0.00303663 | 0.191219057 | 0.307636498 |
| cg02454815 | PTOV1       | 19 | 0.00223518 | 0.707630637 | 0.817482934 |
| cg12857652 | PTP4A1      | 6  | 0.01075114 | 0.484333615 | 0.647860313 |
| cg01542486 | PTP4A3;PTP4 | 8  | 0.04661067 | 0.552583144 | 0.669796219 |
| cg11441148 | PTPLAD1     | 15 | 0.01720487 | 0.265969016 | 0.366424916 |
| cg23473863 | PTPLB       | 3  | 0.03910208 | 0.747286933 | 0.870300649 |
| cg07268431 | PTPN23      | 3  | 0.01967595 | 0.154243336 | 0.325717411 |

|            |             |    |            |             |             |
|------------|-------------|----|------------|-------------|-------------|
| cg27234747 | PTPN4       | 2  | 0.00302015 | 0.3133119   | 0.501586857 |
| cg22335340 | PTPN6;C12or | 12 | 0.01314222 | 0.539414031 | 0.660226305 |
| cg21278103 | PTPRA;PTPRA | 20 | 0.00733413 | 0.24436992  | 0.347754122 |
| cg14048460 | PTPRD;PTPRI | 9  | 0.00776948 | 0.618928738 | 0.726055755 |
| cg04025127 | PTPRF;PTPRF | 1  | 0.00128089 | 0.395582867 | 0.538721449 |
| cg13235366 | PTPRF;PTPRF | 1  | 0.00229588 | 0.151086    | 0.294022543 |
| cg24808162 | PTPRF;PTPRF | 1  | 0.00533499 | 0.324301395 | 0.42800432  |
| cg18022607 | PTPRG       | 3  | 0.03975753 | 0.643365168 | 0.744673134 |
| cg27118533 | PTPRK;PTPRK | 6  | 0.01740203 | 0.126547088 | 0.284827975 |
| cg02505956 | PTPRN2;PTPF | 7  | 0.00036379 | 0.310091026 | 0.538168821 |
| cg21323106 | PTPRN2;PTPF | 7  | 0.00217209 | 0.388617813 | 0.575682545 |
| cg05101821 | PTPRN2;PTPF | 7  | 0.02285172 | 0.465111516 | 0.609862123 |
| cg09130676 | PTPRN2;PTPF | 7  | 0.01522506 | 0.381004822 | 0.514858832 |
| cg18849847 | PTPRN2;PTPF | 7  | 0.03063257 | 0.681565656 | 0.787769824 |
| cg15085205 | PTPRR       | 12 | 0.00647276 | 0.351255537 | 0.514047507 |
| cg04757389 | PTPRS;PTPRS | 19 | 0.00151936 | 0.137313883 | 0.262572614 |
| cg21488876 | PTPRS;PTPRS | 19 | 0.01302631 | 0.175753968 | 0.286881816 |
| cg13896328 | PTPRU;PTPRI | 1  | 0.0018887  | 0.204472135 | 0.35994243  |
| cg05724097 | PUSL1       | 1  | 0.00055533 | 0.580900701 | 0.698620207 |
| cg26369180 | PUSL1       | 1  | 0.00547019 | 0.553947866 | 0.668654912 |
| cg25328384 | PVR;PVR;PVF | 19 | 0.03673675 | 0.213843946 | 0.369284601 |
| cg20847701 | PVT1        | 8  | 0.00827511 | 0.12466712  | 0.320425333 |
| cg07733247 | PWWP2B;PM   | 10 | 0.00069426 | 0.533174092 | 0.656580201 |
| cg15995714 | PWWP2B;PM   | 10 | 0.00059981 | 0.464794332 | 0.5700615   |
| cg20311673 | PXDN        | 2  | 0.00501753 | 0.243092114 | 0.406187019 |
| cg14230647 | PXDN        | 2  | 0.02396889 | 0.542636433 | 0.653222568 |
| cg21514857 | PXDNL       | 8  | 0.04424731 | 0.245160493 | 0.381752222 |
| cg11855524 | PXMP2       | 12 | 0.02786633 | 0.661631208 | 0.767805776 |
| cg09849967 | QARS        | 3  | 0.0041214  | 0.601639169 | 0.749100747 |
| cg13991698 | QSOX1;QSOX  | 1  | 8.60E-05   | 0.554030287 | 0.704143899 |
| cg23626387 | QSOX1;QSOX  | 1  | 0.00461952 | 0.162242152 | 0.30999372  |
| cg10023454 | QSOX1;QSOX  | 1  | 0.02785078 | 0.56249425  | 0.691300541 |
| cg05324989 | QTRT1       | 19 | 0.00816666 | 0.349438498 | 0.495437318 |
| cg02363202 | R3HDM2      | 12 | 0.00151456 | 0.368050899 | 0.504202424 |
| cg04685747 | RAB11B      | 19 | 0.0164709  | 0.303604451 | 0.41434242  |
| cg09962377 | RAB11FIP3   | 16 | 0.00416032 | 0.170925782 | 0.340518232 |
| cg00806214 | RAB11FIP3   | 16 | 0.00034862 | 0.347543949 | 0.450856551 |
| cg09408143 | RAB11FIP3;R | 16 | 0.02766815 | 0.379755772 | 0.488137014 |
| cg03644750 | RAB11FIP3;R | 16 | 0.00118547 | 0.67885054  | 0.786976371 |
| cg06059043 | RAB11FIP3;R | 16 | 0.01477303 | 0.380214057 | 0.481667339 |
| cg05000339 | RAB11FIP4   | 17 | 0.00104555 | 0.270519625 | 0.426621327 |
| cg24174232 | RAB11FIP4   | 17 | 0.00394117 | 0.184477454 | 0.333133824 |
| cg25709050 | RAB11FIP4   | 17 | 0.00466407 | 0.27063055  | 0.402607751 |
| cg16779580 | RAB11FIP4   | 17 | 0.02863399 | 0.181326484 | 0.305500693 |
| cg01433190 | RAB11FIP5   | 2  | 0.03299538 | 0.433390384 | 0.591561781 |
| cg26881535 | RAB3GAP2;A  | 1  | 0.00332328 | 0.237078621 | 0.474860114 |

|            |                |    |            |             |             |
|------------|----------------|----|------------|-------------|-------------|
| cg03349407 | RAB3GAP2;A     | 1  | 0.00632225 | 0.291686337 | 0.496072813 |
| cg06755297 | RAB3GAP2;A     | 1  | 0.00604701 | 0.661954564 | 0.788429725 |
| cg18573251 | RAB3IL1        | 11 | 0.0028186  | 0.222622715 | 0.434497555 |
| cg03828193 | RAB40B         | 17 | 0.00577668 | 0.365754241 | 0.509475664 |
| cg07597022 | RAB40C         | 16 | 0.00071774 | 0.490896212 | 0.675318581 |
| cg04911050 | RAB40C         | 16 | 0.00303288 | 0.386310597 | 0.516224819 |
| cg06714655 | RAB40C         | 16 | 0.00571569 | 0.644611542 | 0.769760048 |
| cg08524190 | RAB43          | 3  | 0.02248484 | 0.224158258 | 0.368219273 |
| cg25961292 | RAB6A;RAB6     | 11 | 0.03975084 | 0.585785307 | 0.687709815 |
| cg10098464 | RAB7L1;RAB7L1  | 1  | 0.0013563  | 0.397632309 | 0.557543236 |
| cg06459724 | RAB7L1;RAB7L1  | 1  | 0.00515955 | 0.153254697 | 0.299511365 |
| cg08523456 | RAB8A          | 19 | 0.04838893 | 0.481639924 | 0.5834556   |
| cg12019814 | RAD21          | 8  | 0.00157763 | 0.579711387 | 0.737996292 |
| cg09914029 | RAD21          | 8  | 0.00287379 | 0.712108772 | 0.843971565 |
| cg04147497 | RAD51L1        | 14 | 0.02088    | 0.389132757 | 0.527032568 |
| cg09388160 | RAD51L1        | 14 | 0.01318141 | 0.829820287 | 0.94761513  |
| cg14290070 | RAD51L1;RAI1   | 14 | 0.00969289 | 0.646275091 | 0.757018512 |
| cg01197302 | RADIL          | 7  | 0.00179914 | 0.193580221 | 0.384493214 |
| cg25326856 | RADIL          | 7  | 0.00269344 | 0.397057519 | 0.498700854 |
| cg03461781 | RAGE           | 14 | 0.04072857 | 0.405941605 | 0.538779403 |
| cg19447962 | RAI1           | 17 | 0.00070508 | 0.270530957 | 0.493130189 |
| cg19147912 | RAI1           | 17 | 0.00032917 | 0.288016792 | 0.501670286 |
| cg03791861 | RAI1           | 17 | 0.00039229 | 0.490268341 | 0.664313896 |
| cg06685437 | RAI1           | 17 | 0.0055777  | 0.161365118 | 0.302686418 |
| cg16373176 | RAI1           | 17 | 0.02052516 | 0.315891818 | 0.454772843 |
| cg21126828 | RAI1           | 17 | 0.0310947  | 0.558487132 | 0.682348796 |
| cg06775073 | RAI1           | 17 | 0.00073118 | 0.231391801 | 0.350971101 |
| cg13658093 | RAI1           | 17 | 0.04990637 | 0.628874752 | 0.735584742 |
| cg02147681 | RAI1           | 17 | 0.00579974 | 0.143865895 | 0.249459259 |
| cg10870160 | RAI1           | 17 | 0.00946953 | 0.220766168 | 0.322126851 |
| cg07505049 | RAI14;RAI14;   | 5  | 0.0039499  | 0.61686173  | 0.736508015 |
| cg01363736 | RALGAPB        | 20 | 5.40E-05   | 0.579392488 | 0.813025449 |
| cg14586546 | RALGDS         | 9  | 0.00291803 | 0.228780903 | 0.37350117  |
| cg14468055 | RALGDS         | 9  | 0.00053483 | 0.699044775 | 0.811141421 |
| cg14541011 | RALGDS;RALGAPB | 9  | 0.00078633 | 0.153072834 | 0.26272416  |
| cg13471932 | RALGDS;RALGAPB | 9  | 0.00718013 | 0.588611868 | 0.693834436 |
| cg10846682 | RAMP1          | 2  | 0.00043645 | 0.313295009 | 0.495199046 |
| cg02091185 | RANBP17        | 5  | 0.03973449 | 0.227601597 | 0.328000601 |
| cg02909097 | RAP1GAP2;R     | 17 | 0.00050982 | 0.238231561 | 0.414773414 |
| cg15070283 | RAP1GAP2;R     | 17 | 0.0077782  | 0.451536884 | 0.561686916 |
| cg07211684 | RAPGEF2        | 4  | 0.01849695 | 0.591800897 | 0.696811564 |
| cg26738160 | RAPSN;RAPS     | 11 | 0.00321939 | 0.176279155 | 0.294530937 |
| cg26878655 | RARA;RARA;f    | 17 | 0.00052049 | 0.544478644 | 0.687255513 |
| cg15803221 | RARA;RARA;f    | 17 | 0.0003354  | 0.270209349 | 0.408991778 |
| cg19458020 | RARA;RARA;f    | 17 | 0.00505472 | 0.13208465  | 0.256419509 |
| cg10592478 | RARG;RARG      | 12 | 0.0014077  | 0.208383293 | 0.416480259 |

|            |              |    |            |             |             |
|------------|--------------|----|------------|-------------|-------------|
| cg21746001 | RARG;RARG    | 12 | 0.01531015 | 0.50872025  | 0.64079542  |
| cg13937905 | RARG;RARG    | 12 | 0.00191296 | 0.356811431 | 0.460367337 |
| cg08977270 | RARRES1;RAI  | 3  | 0.00170178 | 0.528959333 | 0.643486678 |
| cg05187651 | RASA3        | 13 | 4.94E-05   | 0.279569285 | 0.631270075 |
| cg18013730 | RASA3        | 13 | 0.00033508 | 0.269155418 | 0.488000066 |
| cg00502575 | RASA3        | 13 | 0.00037844 | 0.398847391 | 0.613583625 |
| cg21107044 | RASA3        | 13 | 0.00095935 | 0.332979691 | 0.517011749 |
| cg15082473 | RASA3        | 13 | 0.02293515 | 0.331591713 | 0.48714053  |
| cg10124548 | RASA3        | 13 | 0.00122521 | 0.263191165 | 0.402327545 |
| cg06560223 | RASA3        | 13 | 0.02903712 | 0.380435382 | 0.499642967 |
| cg24701606 | RASA3        | 13 | 0.04646973 | 0.572007095 | 0.681139494 |
| cg22906709 | RASA3        | 13 | 0.03228528 | 0.610632015 | 0.715126968 |
| cg22216196 | RASAL3       | 19 | 0.00052566 | 0.312588386 | 0.449260874 |
| cg24002183 | RASAL3       | 19 | 0.001146   | 0.357676286 | 0.481111144 |
| cg12360046 | RASAL3       | 19 | 0.00035856 | 0.336645174 | 0.445849113 |
| cg08846870 | RASAL3       | 19 | 0.00279548 | 0.138006987 | 0.24223855  |
| cg15436174 | RASGEF1A     | 10 | 0.04212867 | 0.443313731 | 0.546014297 |
| cg04493793 | RASGRF2      | 5  | 0.00291759 | 0.623544811 | 0.740918207 |
| cg15787807 | RASGRP2;RA   | 11 | 0.02873594 | 0.296258647 | 0.413630219 |
| cg17735563 | RASGRP3;RA   | 2  | 0.00125558 | 0.602087463 | 0.730632172 |
| cg06192057 | RASL12       | 15 | 0.00687475 | 0.32439114  | 0.446223015 |
| cg22356428 | RASSF5;RASS  | 1  | 0.04358138 | 0.132954708 | 0.23355071  |
| cg24881255 | RAX2;RAX2    | 19 | 0.01343759 | 0.314460199 | 0.418098839 |
| cg07001334 | RBM20        | 10 | 0.00180528 | 0.62791142  | 0.739911567 |
| cg21226754 | RBM22        | 5  | 0.00696459 | 0.61192029  | 0.730892501 |
| cg08161081 | RBM39;RBM    | 20 | 0.02232953 | 0.282948996 | 0.411296    |
| cg27052183 | RBM4         | 11 | 0.0439296  | 0.429209835 | 0.545490508 |
| cg22109787 | RBM43        | 2  | 0.02926923 | 0.207057258 | 0.358023404 |
| cg04355617 | RBM46        | 4  | 0.00025709 | 0.763188409 | 0.890101955 |
| cg08127080 | RBMS1;RBM!   | 2  | 0.0072262  | 0.34008088  | 0.537874502 |
| cg02048613 | RBMS1;RBM!   | 2  | 0.01978318 | 0.301811999 | 0.448299171 |
| cg14032077 | RBMS1;RBM!   | 2  | 0.03685379 | 0.156575141 | 0.271473277 |
| cg08667600 | RBMS3;RBM!   | 3  | 0.00016884 | 0.375974416 | 0.669751475 |
| cg22494026 | RBMS3;RBM!   | 3  | 0.0036843  | 0.211345247 | 0.43061469  |
| cg25834692 | RBMS3;RBM!   | 3  | 0.00354851 | 0.633346822 | 0.791505321 |
| cg23537305 | RBMS3;RBM!   | 3  | 0.00798582 | 0.595583093 | 0.717859294 |
| cg22992279 | RBPJ;RBPJ;RE | 4  | 0.01696142 | 0.406814137 | 0.561152688 |
| cg16550606 | RCBTB1       | 13 | 0.00067726 | 0.249114763 | 0.423588882 |
| cg17487741 | RCBTB1       | 13 | 0.00167042 | 0.160826606 | 0.32826465  |
| cg13471374 | RCL1         | 9  | 0.0021457  | 0.536898017 | 0.693706498 |
| cg03907174 | RCN3         | 19 | 0.00572475 | 0.310130288 | 0.523488434 |
| cg22619810 | RCOR2        | 11 | 0.00487885 | 0.695903715 | 0.828345985 |
| cg10823566 | RCSD1        | 1  | 0.00450576 | 0.238244929 | 0.421594177 |
| cg18744482 | RDBP         | 6  | 0.00246356 | 0.460943296 | 0.580296283 |
| cg09354263 | RECQL5;LOC   | 17 | 2.96E-05   | 0.263418677 | 0.47574356  |
| cg08907956 | REEP3        | 10 | 0.00057456 | 0.37783815  | 0.596425048 |

|            |             |    |            |             |             |
|------------|-------------|----|------------|-------------|-------------|
| cg11937768 | REEP3       | 10 | 0.00824491 | 0.316421025 | 0.527458355 |
| cg14396758 | RELL1;RELL1 | 4  | 0.01311738 | 0.437940083 | 0.599086437 |
| cg02047803 | RELL2;RELL2 | 5  | 0.00301858 | 0.32975092  | 0.438200822 |
| cg10630085 | RELT;RELT   | 11 | 0.00343438 | 0.391256673 | 0.574293365 |
| cg27235337 | RER1        | 1  | 0.00070392 | 0.174677192 | 0.398875908 |
| cg19400316 | RERE;RERE   | 1  | 0.00982444 | 0.328088    | 0.533850716 |
| cg25722041 | RERE;RERE   | 1  | 0.00087119 | 0.402469543 | 0.567341346 |
| cg13400249 | RERE;RERE;R | 1  | 0.04198024 | 0.31773351  | 0.455888981 |
| cg02780029 | RET;RET     | 10 | 0.00043527 | 0.398325356 | 0.559883206 |
| cg18850929 | REXO1       | 19 | 0.00023963 | 0.456927029 | 0.575274532 |
| cg04212651 | RFPL4B      | 6  | 0.00089898 | 0.518532167 | 0.739464742 |
| cg24250363 | RFPL4B      | 6  | 0.00114657 | 0.242165426 | 0.407149617 |
| cg15952465 | RFPL4B      | 6  | 0.02698902 | 0.567329958 | 0.695557059 |
| cg07205154 | RFWD2;RFW   | 1  | 0.0024123  | 0.544462747 | 0.71223585  |
| cg12728543 | RFWD2;RFW   | 1  | 0.02707074 | 0.646475861 | 0.784089564 |
| cg07297322 | RFWD3       | 16 | 0.00422651 | 0.540489569 | 0.672561328 |
| cg08675117 | RFX2;RFX2   | 19 | 0.04461663 | 0.154098138 | 0.270734355 |
| cg25741259 | RFX2;RFX2   | 19 | 0.02129001 | 0.546392922 | 0.655826574 |
| cg13951632 | RGL1        | 1  | 0.03523184 | 0.774659584 | 0.880515373 |
| cg24937727 | RGL3;RGL3   | 19 | 0.0141948  | 0.125287976 | 0.237289797 |
| cg26905931 | RGMA;RGM/   | 15 | 0.00058463 | 0.219677871 | 0.453423908 |
| cg14819229 | RGMA;RGM/   | 15 | 0.0027045  | 0.570636651 | 0.778329653 |
| cg03462901 | RGMA;RGM/   | 15 | 0.00025565 | 0.303688542 | 0.509211074 |
| cg05342906 | RGMA;RGM/   | 15 | 0.00053746 | 0.604911632 | 0.732867102 |
| cg24569831 | RGMA;RGM/   | 15 | 0.00017486 | 0.234318168 | 0.38870026  |
| cg13838057 | RGP1;GBA2   | 9  | 0.00499596 | 0.661766695 | 0.800696343 |
| cg13702185 | RGS12;RGS1: | 4  | 0.00466266 | 0.195840006 | 0.36111442  |
| cg03971808 | RGS12;RGS1: | 4  | 0.00024762 | 0.655884465 | 0.79204981  |
| cg08403043 | RGS12;RGS1: | 4  | 0.0005266  | 0.330306525 | 0.526892595 |
| cg10954765 | RGS12;RGS1: | 4  | 0.01542542 | 0.623143377 | 0.765338647 |
| cg16324409 | RGS12;RGS1: | 4  | 0.00850506 | 0.161594877 | 0.283667614 |
| cg05023691 | RGS13;RGS1: | 1  | 0.03147495 | 0.598254377 | 0.750139506 |
| cg06569139 | RGS22       | 8  | 0.02341466 | 0.305935695 | 0.414335422 |
| cg21836117 | RGS6        | 14 | 0.00109964 | 0.385323243 | 0.502722992 |
| cg21910196 | RGS6        | 14 | 0.01509301 | 0.403150765 | 0.50327342  |
| cg05333149 | RHBDD3      | 22 | 0.00026401 | 0.43966843  | 0.54062016  |
| cg07405083 | RHBDF1      | 16 | 0.0012626  | 0.21044067  | 0.388492853 |
| cg00179196 | RHBDF1      | 16 | 0.00185104 | 0.351261456 | 0.469123148 |
| cg11164618 | RHBDF2;RHB  | 17 | 0.00924069 | 0.436552664 | 0.539018473 |
| cg15120848 | RHBDL2      | 1  | 0.01861367 | 0.58936932  | 0.707305004 |
| cg18237616 | RHEB        | 7  | 0.00522979 | 0.22243202  | 0.392237427 |
| cg20333869 | RHEB        | 7  | 0.04133244 | 0.41119346  | 0.563542287 |
| cg22780675 | RHOBTB3     | 5  | 0.03928654 | 0.181046483 | 0.363135247 |
| cg12473775 | RHOD        | 11 | 0.00739374 | 0.150984274 | 0.253532561 |
| cg20171453 | RHOH        | 4  | 0.01347545 | 0.415827726 | 0.53016634  |
| cg10331518 | RHOT2       | 16 | 0.00555595 | 0.702379446 | 0.820513244 |

|            |             |    |            |             |             |
|------------|-------------|----|------------|-------------|-------------|
| cg00904273 | RHOT2;WDR   | 16 | 0.03100352 | 0.553247832 | 0.664959894 |
| cg03054541 | RIC3;RIC3   | 11 | 0.00112085 | 0.434505283 | 0.650884218 |
| cg18393905 | RICTOR      | 5  | 0.00020695 | 0.585675363 | 0.819579726 |
| cg02765418 | RIF1        | 2  | 0.04654439 | 0.651407559 | 0.808696054 |
| cg22107662 | RIMBP3      | 22 | 0.00083981 | 0.294213577 | 0.484625019 |
| cg08591048 | RIMBP3C;RIN | 22 | 0.00270401 | 0.290443678 | 0.417595463 |
| cg16621991 | RIMS1;RIMS  | 6  | 0.02201071 | 0.74559428  | 0.867128852 |
| cg27036054 | RIMS1;RIMS  | 6  | 0.00370254 | 0.672261992 | 0.846188306 |
| cg01288337 | RIN3        | 14 | 0.02213643 | 0.260221521 | 0.386308461 |
| cg26751828 | RIN3        | 14 | 0.01345265 | 0.26588235  | 0.374878842 |
| cg15789055 | RING1       | 6  | 0.00890414 | 0.567382871 | 0.668595097 |
| cg13796295 | RIPK3       | 14 | 0.00356845 | 0.445725195 | 0.565711929 |
| cg12903024 | RLBP1       | 15 | 0.00284217 | 0.269090908 | 0.436671097 |
| cg20989926 | RLBP1       | 15 | 0.01952593 | 0.399945395 | 0.521967303 |
| cg10173075 | RLBP1;RLBP1 | 15 | 0.00195139 | 0.386348466 | 0.53441697  |
| cg00452882 | RLTPR       | 16 | 0.0013184  | 0.377483576 | 0.532238393 |
| cg10665490 | RMND5A      | 2  | 0.0080034  | 0.369216552 | 0.522085104 |
| cg23743911 | RMND5A      | 2  | 0.00147662 | 0.280877516 | 0.388991128 |
| cg01835580 | RNASE7      | 14 | 0.00506027 | 0.145370006 | 0.251238946 |
| cg01476179 | RNF126      | 19 | 0.031242   | 0.451636045 | 0.55727629  |
| cg06033764 | RNF138;RNF  | 18 | 0.00757199 | 0.180572123 | 0.289830177 |
| cg17918184 | RNF144A     | 2  | 0.04063465 | 0.618076819 | 0.728563787 |
| cg27346982 | RNF157      | 17 | 0.02869408 | 0.469340517 | 0.598647235 |
| cg02413097 | RNF157      | 17 | 0.00427162 | 0.23759075  | 0.343256117 |
| cg17589449 | RNF185;RNF  | 22 | 0.00590949 | 0.206683217 | 0.33408279  |
| cg22163472 | RNF19B;RNF  | 1  | 0.00199021 | 0.613634247 | 0.747621015 |
| cg24509898 | RNF2        | 1  | 0.01705004 | 0.539481652 | 0.680563666 |
| cg15106452 | RNF208      | 9  | 0.00753661 | 0.52963038  | 0.699340869 |
| cg11606607 | RNF213;RNF  | 17 | 0.01187959 | 0.627730634 | 0.790057571 |
| cg00059309 | RNF213;RNF  | 17 | 0.01345198 | 0.203629974 | 0.305151532 |
| cg19480263 | RNF216;RNF  | 7  | 0.0016245  | 0.472351902 | 0.652625927 |
| cg10329345 | RNF220      | 1  | 0.00674875 | 0.277231289 | 0.414367833 |
| cg09860921 | RNF220      | 1  | 0.00293835 | 0.489562461 | 0.617032475 |
| cg12736877 | RNF39;RNF3  | 6  | 0.00038497 | 0.182698502 | 0.302519659 |
| cg20748242 | RNF44       | 5  | 0.00132594 | 0.140156506 | 0.315902088 |
| cg03163812 | RNF5P1      | 8  | 0.00114478 | 0.278853006 | 0.555852585 |
| cg19311055 | RNF5P1      | 8  | 0.00464266 | 0.434335235 | 0.641359411 |
| cg19488149 | RNGTT       | 6  | 0.04726532 | 0.64225551  | 0.759742886 |
| cg26204913 | RNH1;RNH1;  | 11 | 0.00016571 | 0.516006104 | 0.693227976 |
| cg16933762 | ROBO2;ROBO  | 3  | 0.02575997 | 0.667884789 | 0.828042716 |
| cg24933651 | ROBO2;ROBO  | 3  | 0.01356927 | 0.765895327 | 0.872122012 |
| cg14216252 | ROR1;ROR1   | 1  | 0.0001918  | 0.291060226 | 0.510004733 |
| cg19267457 | ROR1;ROR1   | 1  | 0.00800911 | 0.17147192  | 0.322275072 |
| cg20629316 | ROR1;ROR1   | 1  | 0.00718491 | 0.750484048 | 0.858177739 |
| cg00937392 | ROR2        | 9  | 0.00516027 | 0.457075301 | 0.590057576 |
| cg14044388 | ROR2        | 9  | 0.01695133 | 0.385161772 | 0.502176203 |

|            |             |    |            |             |             |
|------------|-------------|----|------------|-------------|-------------|
| cg08099431 | RORA        | 15 | 0.0330358  | 0.291718635 | 0.533590577 |
| cg03952578 | RORA        | 15 | 0.00126315 | 0.645323695 | 0.767387541 |
| cg22387253 | RORA        | 15 | 0.00411974 | 0.498751766 | 0.612282668 |
| cg09984602 | RORA        | 15 | 0.04875887 | 0.533112774 | 0.645536902 |
| cg02391922 | RORA;RORA;  | 15 | 0.02068381 | 0.162029629 | 0.317587545 |
| cg22143395 | RP1L1       | 8  | 0.0039735  | 0.47587711  | 0.594039468 |
| cg04237489 | RPA1        | 17 | 0.04378638 | 0.711596318 | 0.812631896 |
| cg23227285 | RPA3        | 7  | 0.01042043 | 0.490732026 | 0.599750083 |
| cg12742645 | RPH3AL      | 17 | 0.01403268 | 0.424668444 | 0.610736526 |
| cg22251117 | RPH3AL      | 17 | 0.04087119 | 0.443089863 | 0.583320129 |
| cg09026994 | RPH3AL      | 17 | 0.00808926 | 0.184383696 | 0.317187322 |
| cg02671171 | RPH3AL      | 17 | 0.04244912 | 0.170249192 | 0.293886855 |
| cg17193961 | RPH3AL      | 17 | 0.0090576  | 0.124534611 | 0.243635604 |
| cg17316718 | RPH3AL      | 17 | 0.00191129 | 0.171795134 | 0.289803954 |
| cg11407989 | RPL13AP17;N | 7  | 0.03912243 | 0.385318745 | 0.515446045 |
| cg03286617 | RPRM        | 2  | 0.03556139 | 0.535424678 | 0.682269197 |
| cg01805270 | RPS23       | 5  | 0.00360738 | 0.518060838 | 0.64926621  |
| cg05181927 | RPS24;RPS24 | 10 | 0.01920036 | 0.323861795 | 0.502975246 |
| cg16361947 | RPSA;RPSA;S | 3  | 0.00030197 | 0.195335961 | 0.442463588 |
| cg02864619 | RPTOR;RPTO  | 17 | 7.44E-05   | 0.421417831 | 0.658625059 |
| cg16780847 | RPTOR;RPTO  | 17 | 0.03395864 | 0.351832391 | 0.54845029  |
| cg12434898 | RPTOR;RPTO  | 17 | 0.00423246 | 0.291457289 | 0.446523627 |
| cg01886663 | RPTOR;RPTO  | 17 | 0.00050146 | 0.393436102 | 0.540237392 |
| cg01911440 | RPTOR;RPTO  | 17 | 0.02309012 | 0.363742004 | 0.510130073 |
| cg15815120 | RPTOR;RPTO  | 17 | 0.00074    | 0.620252601 | 0.755563728 |
| cg24327522 | RPTOR;RPTO  | 17 | 0.02171655 | 0.367988704 | 0.50133221  |
| cg20462129 | RPTOR;RPTO  | 17 | 0.00039248 | 0.659709868 | 0.775909749 |
| cg09361653 | RPTOR;RPTO  | 17 | 0.00015308 | 0.448970803 | 0.564407095 |
| cg16438182 | RPTOR;RPTO  | 17 | 0.00306299 | 0.155230202 | 0.268696379 |
| cg06053702 | RPTOR;RPTO  | 17 | 0.00039886 | 0.575381219 | 0.686701478 |
| cg14647957 | RPTOR;RPTO  | 17 | 0.00070928 | 0.699665122 | 0.806329761 |
| cg03890538 | RPTOR;RPTO  | 17 | 0.01221635 | 0.30646182  | 0.406639412 |
| cg03641032 | RPTOR;RPTO  | 17 | 0.0349496  | 0.322687129 | 0.422814089 |
| cg23979027 | RRAGC       | 1  | 0.01121827 | 0.700523808 | 0.815638483 |
| cg12632411 | RRBP1;RRBP: | 20 | 0.00206732 | 0.176215768 | 0.366188248 |
| cg26161708 | RRBP1;RRBP: | 20 | 0.00318247 | 0.11842527  | 0.268862739 |
| cg07597892 | RRBP1;RRBP: | 20 | 0.01329415 | 0.186798778 | 0.308898588 |
| cg01358966 | RRN3P2      | 16 | 0.00577367 | 0.463733372 | 0.608993658 |
| cg06522491 | RRP7B       | 22 | 0.00163875 | 0.206855985 | 0.319231262 |
| cg24517066 | RSAD1       | 17 | 0.03323484 | 0.117347248 | 0.25054424  |
| cg03570279 | RSF1        | 11 | 0.02537592 | 0.716092868 | 0.856420822 |
| cg07112562 | RSU1;RSU1   | 10 | 0.02145024 | 0.561642259 | 0.683809239 |
| cg04851617 | RSU1;RSU1   | 10 | 0.03794673 | 0.703780621 | 0.80566098  |
| cg11012153 | RTEL1;RTEL1 | 20 | 0.0037719  | 0.182852959 | 0.28601054  |
| cg00326131 | RTKN;RTKN;F | 2  | 0.00055166 | 0.150430422 | 0.289994492 |
| cg11994630 | RTKN;RTKN;F | 2  | 0.00035088 | 0.356711656 | 0.468548846 |



|            |             |    |            |             |             |
|------------|-------------|----|------------|-------------|-------------|
| cg22052672 | RTKN;RTKN;F | 2  | 0.00223486 | 0.338283543 | 0.447582925 |
| cg22597794 | RTN4;RTN4;F | 2  | 0.00265137 | 0.688159356 | 0.809325748 |
| cg16474791 | RTN4R       | 22 | 0.00172356 | 0.612092544 | 0.771969473 |
| cg18280126 | RTN4RL2     | 11 | 0.00399603 | 0.438025934 | 0.56237089  |
| cg02767634 | RUFY1;RUFY: | 5  | 0.0091327  | 0.317475412 | 0.511210092 |
| cg04194479 | RUNDC2C     | 16 | 0.00089957 | 0.348157453 | 0.590406186 |
| cg08254842 | RUNDC2C     | 16 | 0.02752528 | 0.223472133 | 0.357122823 |
| cg22644557 | RUNX1T1;RU  | 8  | 0.00171093 | 0.778703411 | 0.893187459 |
| cg14666397 | RUNX1T1;RU  | 8  | 0.00541113 | 0.674104144 | 0.79090568  |
| cg04110902 | RUNX2;RUN>  | 6  | 0.03564622 | 0.544610578 | 0.660464317 |
| cg10013501 | RUNX3;RUN>  | 1  | 0.00225347 | 0.394246502 | 0.523098187 |
| cg05162523 | RUNX3;RUN>  | 1  | 0.00281593 | 0.242018503 | 0.356756137 |
| cg12577372 | RUSC1;C1orf | 1  | 0.00191967 | 0.165642497 | 0.292502716 |
| cg02319187 | RXRA        | 9  | 0.00185603 | 0.472597162 | 0.699917829 |
| cg14344989 | RXRA        | 9  | 0.00553428 | 0.17291785  | 0.371901138 |
| cg04875697 | RXRA        | 9  | 0.00297231 | 0.418564159 | 0.600134869 |
| cg14545975 | RXRA        | 9  | 0.00187795 | 0.446229078 | 0.624301392 |
| cg13425135 | RXRA        | 9  | 0.00163965 | 0.433033996 | 0.560622462 |
| cg11284973 | RXRB        | 6  | 0.00117522 | 0.245611218 | 0.431481311 |
| cg06370855 | RXRB        | 6  | 0.00113051 | 0.217525088 | 0.360783415 |
| cg19033438 | RXRB        | 6  | 0.00538062 | 0.545798691 | 0.673473056 |
| cg04966574 | RXRB        | 6  | 0.00074552 | 0.340909832 | 0.468484912 |
| cg14263924 | RXRB        | 6  | 0.0030301  | 0.580810258 | 0.705622278 |
| cg07516307 | RXRB        | 6  | 0.00047393 | 0.618320322 | 0.731776334 |
| cg08092515 | RYK;RYK     | 3  | 0.01645485 | 0.583057711 | 0.717094803 |
| cg00299070 | RYR2        | 1  | 0.04161958 | 0.188543528 | 0.351709873 |
| cg17080740 | S100A1;S100 | 1  | 0.00262805 | 0.233008697 | 0.373965363 |
| cg14467840 | S100A13;S10 | 1  | 0.00170337 | 0.158305733 | 0.336438974 |
| cg10963218 | S100A13;S10 | 1  | 0.00354059 | 0.248013498 | 0.434771003 |
| cg20847746 | S100A13;S10 | 1  | 0.02135763 | 0.197048553 | 0.367086424 |
| cg15559456 | S100A13;S10 | 1  | 0.00991829 | 0.152827511 | 0.315348696 |
| cg10224088 | S100A13;S10 | 1  | 0.04175185 | 0.204845737 | 0.365848483 |
| cg27441409 | S100A7L2    | 1  | 0.01342878 | 0.406641018 | 0.523339109 |
| cg11064537 | S100B       | 21 | 0.03484112 | 0.140085459 | 0.299987192 |
| cg07152925 | S100B       | 21 | 0.01359455 | 0.096117756 | 0.210577089 |
| cg04353438 | SAFB2       | 19 | 0.01214342 | 0.234218274 | 0.397861468 |
| cg14786757 | SAFB2       | 19 | 0.00224465 | 0.282139599 | 0.407531487 |
| cg04312620 | SALL4       | 20 | 0.00141496 | 0.32850296  | 0.465753702 |
| cg14160518 | SALL4;SALL4 | 20 | 0.00039987 | 0.310942285 | 0.470504918 |
| cg13856810 | SAMD11      | 1  | 0.00516308 | 0.342783181 | 0.494507474 |
| cg23901920 | SAMD4A;SAM  | 14 | 0.01491851 | 0.131414749 | 0.298096724 |
| cg10888242 | SAMD4A;SAM  | 14 | 0.02218108 | 0.291466641 | 0.445376101 |
| cg02035733 | SAMD4A;SAM  | 14 | 0.00307804 | 0.502675134 | 0.615288127 |
| cg16075775 | SAMD4A;SAM  | 14 | 0.03785784 | 0.684753654 | 0.79112532  |
| cg09890930 | SARNP;SARN  | 12 | 0.02163794 | 0.244906332 | 0.361271824 |
| cg11847805 | SART3       | 12 | 0.03910831 | 0.66016808  | 0.792919103 |

|            |             |    |            |             |             |
|------------|-------------|----|------------|-------------|-------------|
| cg26300500 | SBF1        | 22 | 0.00191739 | 0.470330742 | 0.642503496 |
| cg15226135 | SBF1        | 22 | 0.00252603 | 0.674380639 | 0.817415489 |
| cg18019717 | SBF1        | 22 | 0.0031712  | 0.514531121 | 0.639054533 |
| cg07016730 | SBF1        | 22 | 0.04560502 | 0.395093287 | 0.511934611 |
| cg09506661 | SBNO2       | 19 | 0.00365072 | 0.576936487 | 0.774421085 |
| cg18693051 | SBNO2       | 19 | 0.00406408 | 0.168602252 | 0.3507317   |
| cg06430102 | SBNO2       | 19 | 0.00216814 | 0.592501876 | 0.772032487 |
| cg04563863 | SBNO2       | 19 | 0.01813637 | 0.402689074 | 0.54169282  |
| cg26019472 | SBNO2       | 19 | 0.00297351 | 0.176369015 | 0.313404706 |
| cg08286551 | SBNO2       | 19 | 0.03074873 | 0.383771231 | 0.504616597 |
| cg05634040 | SBNO2       | 19 | 0.02021275 | 0.225638877 | 0.33125706  |
| cg19649900 | SBNO2       | 19 | 0.00211876 | 0.104507604 | 0.207618792 |
| cg21080562 | SBNO2;SBNC  | 19 | 0.00046655 | 0.202153728 | 0.378378912 |
| cg19780712 | SBNO2;SBNC  | 19 | 0.0017736  | 0.468551702 | 0.591544316 |
| cg09759578 | SCAMP4;AD/  | 19 | 0.01214236 | 0.68918053  | 0.804072555 |
| cg22152492 | SCAND3      | 6  | 0.00266436 | 0.407564174 | 0.530248244 |
| cg20781847 | SCARA3;SCAI | 8  | 0.01237513 | 0.152862121 | 0.322670748 |
| cg03871354 | SCARA5      | 8  | 0.01064956 | 0.116510561 | 0.237555476 |
| cg13075279 | SCARB1;SCAF | 12 | 0.00644344 | 0.466399884 | 0.657972003 |
| cg22775642 | SCARB1;SCAF | 12 | 0.0003561  | 0.209730528 | 0.374682805 |
| cg09268718 | SCARF1;SCAF | 17 | 0.00093627 | 0.298366274 | 0.558497033 |
| cg18518722 | SCARF2;SCAF | 22 | 0.00022716 | 0.586589982 | 0.709719668 |
| cg22091609 | SCARF2;SCAF | 22 | 0.01381547 | 0.247847335 | 0.353821925 |
| cg12895179 | SCARF2;SCAF | 22 | 0.0150454  | 0.247095813 | 0.349009398 |
| cg24708308 | SCARNA11;C  | 12 | 0.0059686  | 0.338897092 | 0.521039709 |
| cg16744911 | SCD         | 10 | 0.00155324 | 0.177403937 | 0.361280207 |
| cg02237755 | SCD         | 10 | 0.02497333 | 0.246889806 | 0.399151012 |
| cg04881673 | SCD5;SCD5   | 4  | 0.00065328 | 0.504474606 | 0.683139228 |
| cg23999526 | SCFD2       | 4  | 0.01891861 | 0.139732868 | 0.254518706 |
| cg06633426 | SCMH1;SCMI  | 1  | 0.01052079 | 0.591408807 | 0.726672655 |
| cg16061228 | SCN4B;SCN4I | 11 | 0.00071222 | 0.229503584 | 0.342458219 |
| cg18827501 | SCN7A       | 2  | 0.0012115  | 0.784288443 | 0.885917273 |
| cg24262376 | SCNM1;LYSM  | 1  | 0.02626132 | 0.503729075 | 0.640300425 |
| cg06902698 | SCNM1;LYSM  | 1  | 0.00242177 | 0.162867599 | 0.286573127 |
| cg10294363 | SCNN1A;SCN  | 12 | 0.00294827 | 0.370348303 | 0.558789714 |
| cg12510724 | SCNN1A;SCN  | 12 | 0.00750468 | 0.204229421 | 0.387512145 |
| cg23245485 | SCNN1A;SCN  | 12 | 0.00674493 | 0.417109088 | 0.533207117 |
| cg25098281 | SCNN1A;SCN  | 12 | 0.00696336 | 0.299237467 | 0.403955656 |
| cg05348123 | SCRG1       | 4  | 0.04641961 | 0.557725037 | 0.674931348 |
| cg01324261 | SCRG1;SCRG  | 4  | 0.0214551  | 0.128267307 | 0.27826672  |
| cg04858110 | SCRN1;SCRN  | 7  | 0.00333487 | 0.584282142 | 0.701166059 |
| cg16962683 | SDC2        | 8  | 0.00186103 | 0.196330885 | 0.459075263 |
| cg26842303 | SDC2        | 8  | 0.00207283 | 0.426590395 | 0.635616812 |
| cg12190613 | SDC2        | 8  | 0.00497449 | 0.324848071 | 0.498108995 |
| cg14830748 | SDC2        | 8  | 0.0094938  | 0.770162873 | 0.874382822 |
| cg14836522 | SDC3        | 1  | 0.01281162 | 0.196836821 | 0.336112361 |

|            |             |    |            |             |             |
|------------|-------------|----|------------|-------------|-------------|
| cg08443357 | SDCBP2      | 20 | 0.01990676 | 0.279504162 | 0.425694787 |
| cg05007126 | SDCBP2      | 20 | 0.00089197 | 0.272891523 | 0.393784261 |
| cg16786297 | SDCBP2;SDCI | 20 | 0.00405878 | 0.550595039 | 0.669479894 |
| cg08262429 | SDCCAG8     | 1  | 0.00165298 | 0.209231873 | 0.439910149 |
| cg18367529 | SDF4;SDF4   | 1  | 0.00040167 | 0.588374216 | 0.710553819 |
| cg02491557 | SDK1        | 7  | 0.03945163 | 0.238616607 | 0.373081284 |
| cg18022346 | SDK1        | 7  | 0.00820423 | 0.542507341 | 0.676161353 |
| cg26275264 | SDK1;SDK1   | 7  | 0.00057702 | 0.511544332 | 0.634864184 |
| cg11170896 | SDK1;SDK1   | 7  | 0.01325223 | 0.637033234 | 0.754614716 |
| cg00711291 | SDK2        | 17 | 0.00251006 | 0.18096528  | 0.428525289 |
| cg14295306 | SDK2        | 17 | 0.00119278 | 0.489438329 | 0.665716221 |
| cg13699963 | SDK2        | 17 | 0.00379533 | 0.195658966 | 0.349602348 |
| cg24527434 | SDK2        | 17 | 0.00078314 | 0.316056565 | 0.457125508 |
| cg15836138 | SDK2        | 17 | 0.04227867 | 0.105928912 | 0.212226036 |
| cg26503079 | SDR9C7      | 12 | 0.00092408 | 0.589740562 | 0.718191508 |
| cg15046304 | SEC14L1;SEC | 17 | 0.00033491 | 0.225075098 | 0.444721099 |
| cg20337028 | SEC14L1;SEC | 17 | 0.00660854 | 0.406962982 | 0.578557523 |
| cg25135333 | SEC16B      | 1  | 0.00847987 | 0.451395174 | 0.619899725 |
| cg02289040 | SEC16B      | 1  | 0.02797644 | 0.516454544 | 0.643320256 |
| cg24974611 | SEC16B      | 1  | 0.00642404 | 0.401281925 | 0.50894689  |
| cg07468956 | SECTM1      | 17 | 0.004821   | 0.612644269 | 0.726453712 |
| cg22156899 | SECTM1      | 17 | 0.00381389 | 0.231161257 | 0.337553556 |
| cg17327217 | SELI        | 2  | 0.03619574 | 0.444259416 | 0.568594621 |
| cg16919420 | SELO        | 22 | 0.01014277 | 0.450223038 | 0.572877654 |
| cg04779597 | SELT        | 3  | 0.00482165 | 0.614901394 | 0.748069827 |
| cg12862820 | SEMA3A      | 7  | 0.00048401 | 0.411951319 | 0.690334443 |
| cg13988052 | SEMA3A      | 7  | 0.04902695 | 0.728172282 | 0.840212116 |
| cg19361615 | SEMA3C      | 7  | 0.0134333  | 0.703994985 | 0.807623875 |
| cg17819119 | SEMA4C      | 2  | 0.00380407 | 0.298475407 | 0.460383603 |
| cg05192533 | SEMA4C      | 2  | 0.03293767 | 0.581588982 | 0.740787809 |
| cg11060194 | SEMA4C      | 2  | 0.00086799 | 0.43928539  | 0.562267445 |
| cg02770985 | SEMA4C      | 2  | 0.01860501 | 0.418233324 | 0.534298892 |
| cg13474090 | SEMA4D;SEM  | 9  | 0.03395234 | 0.559820301 | 0.681539987 |
| cg21578050 | SEMA6A      | 5  | 0.0001566  | 0.721568822 | 0.856662286 |
| cg09143801 | SEMA6C      | 1  | 0.00049471 | 0.154212791 | 0.295502363 |
| cg27157619 | SEMA7A;SEM  | 15 | 0.00043909 | 0.2693934   | 0.491621049 |
| cg14397309 | SENP1       | 12 | 0.02906349 | 0.155581041 | 0.282607666 |
| cg16976499 | SENP6;SENP6 | 6  | 0.01474116 | 0.337751888 | 0.480999085 |
| cg09413645 | SEPT11      | 4  | 0.04979195 | 0.730592832 | 0.875243084 |
| cg03432618 | SEPT3       | 22 | 0.00960844 | 0.356806227 | 0.502182378 |
| cg19759172 | SEPT4;SEPT4 | 17 | 0.00057877 | 0.378215922 | 0.49571208  |
| cg24576026 | SEPT9;SEPT9 | 17 | 0.00506027 | 0.15557054  | 0.261111555 |
| cg19083265 | SEPT9;SEPT9 | 17 | 0.00380979 | 0.643525229 | 0.74479251  |
| cg26079706 | SEPT9;SEPT9 | 17 | 0.00079855 | 0.485534025 | 0.663791251 |
| cg01320579 | SEPT9;SEPT9 | 17 | 0.00047964 | 0.245067693 | 0.421611017 |
| cg07827420 | SEPT9;SEPT9 | 17 | 0.00134829 | 0.342526163 | 0.503091321 |

|            |               |    |            |             |             |
|------------|---------------|----|------------|-------------|-------------|
| cg17112975 | SEPT9;SEPT9   | 17 | 0.0034533  | 0.206807829 | 0.339904666 |
| cg00871371 | SEPT9;SEPT9   | 17 | 0.01757612 | 0.461055082 | 0.58524174  |
| cg17922695 | SEPT9;SEPT9   | 17 | 0.00067128 | 0.427988379 | 0.599242844 |
| cg12194864 | SEPT9;SEPT9   | 17 | 0.00148749 | 0.663983385 | 0.810322226 |
| cg14843920 | SEPT9;SEPT9   | 17 | 0.00459497 | 0.625390618 | 0.763026299 |
| cg07324245 | SEPT9;SEPT9   | 17 | 0.0025219  | 0.185744953 | 0.308270823 |
| cg02397064 | SEPT9;SEPT9   | 17 | 0.0002752  | 0.629592156 | 0.748769022 |
| cg14885762 | SEPT9;SEPT9   | 17 | 0.00088441 | 0.265959425 | 0.381186997 |
| cg17053854 | SEPT9;SEPT9   | 17 | 0.00012484 | 0.704587339 | 0.817441287 |
| cg02482730 | SEPT9;SEPT9   | 17 | 0.04461865 | 0.137632172 | 0.293532345 |
| cg06791979 | SEPT9;SEPT9   | 17 | 0.00275835 | 0.386772696 | 0.511934993 |
| cg01899544 | SEPT9;SEPT9   | 17 | 0.01033099 | 0.532984542 | 0.647189084 |
| cg26415789 | SEPT9;SEPT9   | 17 | 0.03173688 | 0.514657914 | 0.617731991 |
| cg12673019 | SERGEF        | 11 | 0.04990401 | 0.354581702 | 0.51143725  |
| cg21985691 | SERGEF        | 11 | 0.001245   | 0.192669026 | 0.343850209 |
| cg12480176 | SERINC1       | 6  | 0.01443894 | 0.678660878 | 0.801480834 |
| cg06677021 | SERINC5       | 5  | 0.0034773  | 0.599308476 | 0.765237009 |
| cg02126235 | SERPINA1;SE   | 14 | 0.00405878 | 0.127568858 | 0.230064304 |
| cg24099605 | SERPINA4      | 14 | 0.00527843 | 0.369697253 | 0.524401545 |
| cg23524537 | SERPINA4      | 14 | 0.00024762 | 0.253737321 | 0.392941907 |
| cg24349668 | SERPINB7;SE   | 18 | 0.04908743 | 0.726209113 | 0.847074651 |
| cg07348591 | SERPINE2;SEI  | 2  | 0.02149089 | 0.640247117 | 0.802757124 |
| cg21458932 | SERPINF2;SEI  | 17 | 0.00217695 | 0.333266851 | 0.433869077 |
| cg01417313 | SERTAD4       | 1  | 0.00014645 | 0.184699175 | 0.443857294 |
| cg24180006 | SETD3;SETD3   | 14 | 0.00263798 | 0.213308697 | 0.457648573 |
| cg22633932 | SETD7         | 4  | 3.61E-05   | 0.488392923 | 0.68960811  |
| cg22885062 | SF1;SF1;SF1   | 11 | 0.02385018 | 0.56322465  | 0.711890805 |
| cg03986574 | SF1;SF1;SF1;' | 11 | 0.00016594 | 0.582020035 | 0.750185172 |
| cg03421300 | SFN           | 1  | 0.00796446 | 0.592211881 | 0.719648051 |
| cg13466284 | SFN;SFN       | 1  | 0.01346934 | 0.34327529  | 0.453554936 |
| cg02154585 | SFRP1         | 8  | 0.00127001 | 0.483315049 | 0.645630423 |
| cg21977218 | SFRS12;SFRS   | 5  | 0.02135763 | 0.49536733  | 0.610488262 |
| cg22363327 | SFRS13B       | 6  | 0.00023641 | 0.150599562 | 0.257883441 |
| cg15817163 | SFRS8         | 12 | 0.03020602 | 0.409266285 | 0.562924651 |
| cg06555661 | SFRS8         | 12 | 0.02869285 | 0.359884103 | 0.50277185  |
| cg08383863 | SFXN5         | 2  | 0.00357907 | 0.484683493 | 0.630463985 |
| cg22830638 | SFXN5         | 2  | 0.00039642 | 0.185303982 | 0.317251139 |
| cg04582295 | SGCA;SGCA     | 17 | 0.00014612 | 0.508735302 | 0.616807434 |
| cg15756653 | SGCA;SGCA;S   | 17 | 0.01012575 | 0.526118004 | 0.630627115 |
| cg00880562 | SGEF          | 3  | 0.01585814 | 0.431939677 | 0.547347448 |
| cg12270633 | SGIP1         | 1  | 0.00114525 | 0.740989918 | 0.867932883 |
| cg03920161 | SGK2;SGK2     | 20 | 0.0028542  | 0.385825986 | 0.510986417 |
| cg13799263 | SGMS1         | 10 | 0.01980653 | 0.258899471 | 0.417583811 |
| cg26950624 | SGSH          | 17 | 0.00633391 | 0.525960729 | 0.65659136  |
| cg09806432 | SGSM2;SGSM    | 17 | 0.00229808 | 0.432072527 | 0.602040503 |
| cg02569219 | SGSM2;SGSM    | 17 | 0.01129525 | 0.623073046 | 0.741082385 |

|            |             |    |            |             |             |
|------------|-------------|----|------------|-------------|-------------|
| cg23375247 | SGTA        | 19 | 0.00079395 | 0.308135182 | 0.541309128 |
| cg05910867 | SGTA        | 19 | 0.01713603 | 0.604105435 | 0.749185919 |
| cg26632151 | SGTA        | 19 | 0.00340201 | 0.383736088 | 0.488656785 |
| cg18378817 | SGTA        | 19 | 0.00230751 | 0.549883973 | 0.653140801 |
| cg10259889 | SH2B2       | 7  | 0.0079422  | 0.231567142 | 0.338419926 |
| cg13737221 | SH2D3C;SH2I | 9  | 0.00251761 | 0.127923389 | 0.279334998 |
| cg13883603 | SH2D3C;SH2I | 9  | 0.00131248 | 0.360475083 | 0.48050871  |
| cg13828227 | SH2D3C;SH2I | 9  | 0.00064112 | 0.290888697 | 0.400804448 |
| cg10362613 | SH2D4A      | 8  | 0.00238262 | 0.282256159 | 0.455256096 |
| cg08975445 | SH2D4B;SH2I | 10 | 0.01784623 | 0.241985258 | 0.361810213 |
| cg13609167 | SH3BP2;SH3I | 4  | 0.00045128 | 0.419998704 | 0.521694535 |
| cg18403548 | SH3BP2;SH3I | 4  | 0.00228765 | 0.20966631  | 0.367231079 |
| cg09042791 | SH3BP4      | 2  | 0.00142303 | 0.303992318 | 0.557532613 |
| cg12559925 | SH3BP4      | 2  | 0.00415384 | 0.271036    | 0.4601794   |
| cg01854776 | SH3BP4      | 2  | 0.00467735 | 0.213454869 | 0.375944188 |
| cg11677744 | SH3BP4      | 2  | 0.00335867 | 0.160211701 | 0.293645089 |
| cg19998400 | SH3BP4      | 2  | 0.03476568 | 0.169951042 | 0.288738082 |
| cg01881549 | SH3BP4      | 2  | 0.02414701 | 0.161720462 | 0.279948821 |
| cg01696784 | SH3BP4      | 2  | 0.02734218 | 0.177798545 | 0.293940147 |
| cg24203758 | SH3D20      | 17 | 0.00085802 | 0.308533129 | 0.441799154 |
| cg20463302 | SH3D20      | 17 | 0.00051439 | 0.308044987 | 0.440858039 |
| cg02030270 | SH3GL3;SH3C | 15 | 0.00128644 | 0.414493567 | 0.626300692 |
| cg23985995 | SH3PXD2A    | 10 | 0.01181492 | 0.22754135  | 0.363763598 |
| cg04388244 | SH3PXD2A    | 10 | 0.00408448 | 0.315817694 | 0.426034559 |
| cg22973172 | SH3PXD2A    | 10 | 0.00427082 | 0.128242661 | 0.231187466 |
| cg03868944 | SH3PXD2B    | 5  | 0.00312019 | 0.213574861 | 0.43214558  |
| cg13022534 | SH3PXD2B    | 5  | 0.01999399 | 0.167862288 | 0.369445155 |
| cg25693317 | SH3PXD2B    | 5  | 0.02608857 | 0.355714288 | 0.5489771   |
| cg02772159 | SH3PXD2B    | 5  | 0.00018505 | 0.371893264 | 0.541897627 |
| cg15678744 | SH3PXD2B    | 5  | 0.01155521 | 0.126031339 | 0.237515296 |
| cg10529470 | SH3PXD2B    | 5  | 0.00592141 | 0.215347379 | 0.316429437 |
| cg27416948 | SH3RF1      | 4  | 0.00105876 | 0.804393713 | 0.90500999  |
| cg19024599 | SH3RF3      | 2  | 0.00143945 | 0.387850563 | 0.627273736 |
| cg14966782 | SH3RF3      | 2  | 0.0241326  | 0.210489178 | 0.344121749 |
| cg07248017 | SH3TC1      | 4  | 0.00224626 | 0.430410277 | 0.564137923 |
| cg20277282 | SH3TC1      | 4  | 0.00721037 | 0.234244476 | 0.350973264 |
| cg10842314 | SH3TC1      | 4  | 0.01212799 | 0.511470267 | 0.616080619 |
| cg14818279 | SH3TC2      | 5  | 6.54E-05   | 0.323981065 | 0.614297687 |
| cg09548638 | SH3TC2      | 5  | 0.00302664 | 0.234371569 | 0.420354806 |
| cg26474043 | SH3TC2      | 5  | 0.00079396 | 0.236898494 | 0.362029762 |
| cg15418783 | SHANK2      | 11 | 0.00128815 | 0.352266496 | 0.506605485 |
| cg06868991 | SHANK2      | 11 | 0.01306633 | 0.461423364 | 0.604776661 |
| cg17959824 | SHANK2;SHA  | 11 | 6.85E-05   | 0.453256021 | 0.649707915 |
| cg12159995 | SHANK2;SHA  | 11 | 0.00365059 | 0.495992011 | 0.604850523 |
| cg13213810 | SHANK3      | 22 | 0.00045865 | 0.147303951 | 0.286994014 |
| cg06422471 | SHANK3      | 22 | 0.00332856 | 0.13336271  | 0.235084059 |

|            |               |    |            |             |             |
|------------|---------------|----|------------|-------------|-------------|
| cg04112058 | SHCBP1        | 16 | 0.0056963  | 0.550907386 | 0.741523794 |
| cg25801113 | SHF           | 15 | 0.04334592 | 0.567781363 | 0.670484234 |
| cg00954833 | SHFM1         | 7  | 0.01684298 | 0.286372272 | 0.462643369 |
| cg26291675 | SHKBP1        | 19 | 0.01426159 | 0.555511195 | 0.658552441 |
| cg12639933 | SHMT2;SHM     | 12 | 0.00037346 | 0.198713738 | 0.343074718 |
| cg05016201 | SHOC2         | 10 | 0.03321432 | 0.386403541 | 0.545793059 |
| cg25004176 | SHPK;TRPV1    | 17 | 0.01156455 | 0.770070634 | 0.893853201 |
| cg03184410 | SHROOM3       | 4  | 0.0022517  | 0.694717379 | 0.814670187 |
| cg13284789 | SIDT1         | 3  | 0.01084931 | 0.430201131 | 0.596367034 |
| cg17376853 | SIGIRR;SIGIRI | 11 | 0.01332617 | 0.381466492 | 0.539013869 |
| cg11320438 | SIGLEC11;SIC  | 19 | 0.03041863 | 0.571644651 | 0.673306363 |
| cg10824582 | SIK3          | 11 | 0.02968742 | 0.149252959 | 0.261582227 |
| cg25462751 | SIL1;SIL1     | 5  | 0.0071726  | 0.231351766 | 0.421584242 |
| cg07536018 | SIL1;SIL1     | 5  | 0.02134171 | 0.120432285 | 0.309499774 |
| cg01324702 | SIL1;SIL1     | 5  | 0.00797628 | 0.134699754 | 0.274169652 |
| cg19951297 | SIL1;SIL1     | 5  | 0.01118943 | 0.107000005 | 0.211235587 |
| cg10538440 | SIM2;SIM2     | 21 | 0.01096723 | 0.298435605 | 0.461488691 |
| cg10814646 | SIM2;SIM2     | 21 | 0.00748222 | 0.205937501 | 0.35295138  |
| cg21033440 | SIPA1;SIPA1   | 11 | 0.00093627 | 0.220897995 | 0.376391978 |
| cg24147428 | SIPA1;SIPA1   | 11 | 0.00250802 | 0.255470106 | 0.35711622  |
| cg18975839 | SIPA1L2       | 1  | 0.00561254 | 0.606154182 | 0.728647818 |
| cg15537788 | SIPA1L3       | 19 | 0.01046493 | 0.350114844 | 0.500948076 |
| cg08622098 | SIPA1L3       | 19 | 0.00128959 | 0.744456716 | 0.857833733 |
| cg04400145 | SIRPA         | 20 | 0.02235382 | 0.251618372 | 0.385546479 |
| cg00472837 | SIRPD         | 20 | 0.00756111 | 0.602633226 | 0.727975592 |
| cg13832290 | SIT1          | 9  | 5.93E-05   | 0.326397589 | 0.457015343 |
| cg27181142 | SIX5          | 19 | 0.00022291 | 0.249113551 | 0.406271126 |
| cg24338091 | SIX5          | 19 | 0.00469565 | 0.152785121 | 0.2745998   |
| cg25686087 | SIX5          | 19 | 0.00094173 | 0.228825544 | 0.348306614 |
| cg04842161 | SKAP2         | 7  | 0.0181949  | 0.620992126 | 0.744778329 |
| cg02360367 | SKI           | 1  | 0.00055717 | 0.376776657 | 0.607350398 |
| cg24377150 | SKI           | 1  | 0.00331445 | 0.43437414  | 0.616956416 |
| cg12473697 | SKI           | 1  | 0.00485967 | 0.258188055 | 0.421617111 |
| cg17854510 | SKI           | 1  | 0.01797433 | 0.306337154 | 0.442404883 |
| cg05948763 | SKI           | 1  | 0.02268136 | 0.411532786 | 0.543886643 |
| cg21405929 | SKI           | 1  | 0.00482168 | 0.277055785 | 0.403429793 |
| cg04619852 | SKI           | 1  | 0.00623577 | 0.283117984 | 0.404443406 |
| cg03631837 | SKI           | 1  | 0.0242858  | 0.598680947 | 0.715062905 |
| cg02050917 | SKI           | 1  | 0.00195431 | 0.268024524 | 0.381918125 |
| cg05156582 | SKI           | 1  | 0.00398277 | 0.284362728 | 0.39750053  |
| cg12222277 | SKI           | 1  | 0.00212219 | 0.562558134 | 0.669001246 |
| cg16575461 | SKI           | 1  | 0.00926387 | 0.659517125 | 0.760897615 |
| cg14178705 | SKIV2L        | 6  | 0.00180584 | 0.588500374 | 0.745131207 |
| cg13015485 | SKIV2L        | 6  | 0.01204052 | 0.324634498 | 0.473076664 |
| cg24067788 | SKIV2L        | 6  | 0.00199647 | 0.638450783 | 0.746938364 |
| cg04693787 | SKIV2L        | 6  | 0.00104489 | 0.447347555 | 0.551448793 |

|            |             |    |            |             |             |
|------------|-------------|----|------------|-------------|-------------|
| cg13119182 | SLC10A6     | 4  | 0.02359032 | 0.162845495 | 0.308861624 |
| cg01817009 | SLC12A4;SLC | 16 | 0.00085169 | 0.192138386 | 0.424765035 |
| cg06134860 | SLC12A4;SLC | 16 | 0.00035687 | 0.409194771 | 0.522654707 |
| cg10544611 | SLC12A4;SLC | 16 | 2.07E-05   | 0.507467673 | 0.692433812 |
| cg06378129 | SLC12A4;SLC | 16 | 0.00015312 | 0.349177868 | 0.520740302 |
| cg02564259 | SLC12A4;SLC | 16 | 0.00261321 | 0.236967097 | 0.429193926 |
| cg07599484 | SLC12A4;SLC | 16 | 0.00031657 | 0.634464342 | 0.738683195 |
| cg20003638 | SLC12A5;SLC | 20 | 0.00210897 | 0.257992483 | 0.377275937 |
| cg11591485 | SLC12A8     | 3  | 0.01028358 | 0.194524419 | 0.32836627  |
| cg26803305 | SLC14A1;SLC | 18 | 0.00768117 | 0.168351676 | 0.338164988 |
| cg13149442 | SLC14A1;SLC | 18 | 0.02903712 | 0.125877787 | 0.276896938 |
| cg19363889 | SLC14A1;SLC | 18 | 0.00529372 | 0.396555847 | 0.594467803 |
| cg25530583 | SLC14A1;SLC | 18 | 0.04208581 | 0.119384368 | 0.226626039 |
| cg18130079 | SLC16A1;SLC | 1  | 0.0019262  | 0.349240916 | 0.600746613 |
| cg20822693 | SLC16A14    | 2  | 0.03107698 | 0.145948127 | 0.274614717 |
| cg18247852 | SLC16A3;SLC | 17 | 0.00139098 | 0.300177861 | 0.474379583 |
| cg26353859 | SLC16A7     | 12 | 0.03893952 | 0.750754601 | 0.866911567 |
| cg03227481 | SLC16A9     | 10 | 0.01325385 | 0.644312801 | 0.770159314 |
| cg22231400 | SLC17A7     | 19 | 0.01366314 | 0.188978854 | 0.328182753 |
| cg19074198 | SLC19A1     | 21 | 0.00673317 | 0.331149349 | 0.485890733 |
| cg13971030 | SLC1A2      | 11 | 0.04406093 | 0.190823151 | 0.314400036 |
| cg13434757 | SLC22A1;SLC | 6  | 0.02509027 | 0.298679594 | 0.513782512 |
| cg12882392 | SLC22A11    | 11 | 0.00139535 | 0.415930567 | 0.617116696 |
| cg01822289 | SLC22A11    | 11 | 0.00059998 | 0.411378761 | 0.597849432 |
| cg01748193 | SLC22A11    | 11 | 0.00011374 | 0.466564264 | 0.581406538 |
| cg19497444 | SLC22A18;SL | 11 | 0.00139353 | 0.320583247 | 0.452158641 |
| cg06048910 | SLC22A18;SL | 11 | 0.0007719  | 0.230914348 | 0.385483955 |
| cg08472797 | SLC22A18;SL | 11 | 0.00194973 | 0.240336485 | 0.349218691 |
| cg07291601 | SLC22A18AS; | 11 | 0.00095211 | 0.421992442 | 0.689699786 |
| cg25548316 | SLC22A18AS; | 11 | 0.00354337 | 0.260418657 | 0.460610555 |
| cg10943932 | SLC22A18AS; | 11 | 0.00799701 | 0.251595909 | 0.43032121  |
| cg02081198 | SLC22A18AS; | 11 | 0.0018158  | 0.557079594 | 0.694849412 |
| cg24041239 | SLC22A18AS; | 11 | 0.01752457 | 0.639094367 | 0.772892837 |
| cg24102242 | SLC22A23;SL | 6  | 0.00478875 | 0.485498656 | 0.593342849 |
| cg09226986 | SLC22A3     | 6  | 0.00415102 | 0.189867203 | 0.350859732 |
| cg26929925 | SLC23A1;SLC | 5  | 0.00682745 | 0.353805492 | 0.514916932 |
| cg12205435 | SLC23A1;SLC | 5  | 0.01622885 | 0.322418694 | 0.477818794 |
| cg11459648 | SLC23A1;SLC | 5  | 0.00466004 | 0.371898894 | 0.488509928 |
| cg22944803 | SLC24A3;LOC | 20 | 0.01067648 | 0.162177432 | 0.36596493  |
| cg11953252 | SLC24A3;LOC | 20 | 0.04087556 | 0.405627796 | 0.606316572 |
| cg05200313 | SLC24A4;SLC | 14 | 0.01473031 | 0.156925882 | 0.263958237 |
| cg11609462 | SLC25A10    | 17 | 0.0267344  | 0.480200192 | 0.632137633 |
| cg17913115 | SLC25A10    | 17 | 0.01295569 | 0.152062962 | 0.252382526 |
| cg04337734 | SLC25A12    | 2  | 0.00169465 | 0.344879191 | 0.550370443 |
| cg14213297 | SLC25A25;SL | 9  | 0.00724286 | 0.373532549 | 0.480817433 |
| cg02828514 | SLC25A30    | 13 | 0.01954375 | 0.658557949 | 0.779880293 |

|            |             |    |            |             |             |
|------------|-------------|----|------------|-------------|-------------|
| cg16713727 | SLC25A34    | 1  | 0.00011444 | 0.303175251 | 0.468160034 |
| cg10881110 | SLC25A34    | 1  | 0.00224479 | 0.263630103 | 0.38542293  |
| cg26923754 | SLC25A34    | 1  | 5.40E-05   | 0.415597315 | 0.519280386 |
| cg03970032 | SLC25A34;SL | 1  | 0.00021941 | 0.589282668 | 0.698610158 |
| cg02061660 | SLC25A46    | 5  | 0.00632225 | 0.579469864 | 0.717085026 |
| cg09153458 | SLC26A1;IDU | 4  | 0.01311664 | 0.686415325 | 0.811282496 |
| cg25561754 | SLC26A11;SL | 17 | 0.00072443 | 0.338396312 | 0.530006215 |
| cg10930502 | SLC26A11;SL | 17 | 0.0005641  | 0.165513316 | 0.286705632 |
| cg09897656 | SLC26A7;SLC | 8  | 0.03016366 | 0.729727273 | 0.855840761 |
| cg09479512 | SLC27A1     | 19 | 0.00129139 | 0.174543404 | 0.341552859 |
| cg02002247 | SLC27A1     | 19 | 0.02667826 | 0.636040845 | 0.739043878 |
| cg07826642 | SLC29A1;SLC | 6  | 0.00920859 | 0.199951551 | 0.37601202  |
| cg22330763 | SLC29A1;SLC | 6  | 0.03840651 | 0.246410346 | 0.350478735 |
| cg06702884 | SLC29A3     | 10 | 0.02628063 | 0.344441079 | 0.477079294 |
| cg02354828 | SLC29A3     | 10 | 0.02045973 | 0.558733604 | 0.674219635 |
| cg05345039 | SLC2A1      | 1  | 0.00014848 | 0.377315188 | 0.619663273 |
| cg20294984 | SLC2A1      | 1  | 0.00503559 | 0.639107952 | 0.788085726 |
| cg05942022 | SLC2A1      | 1  | 0.01699907 | 0.194820484 | 0.323609452 |
| cg15089806 | SLC2A1      | 1  | 0.00888326 | 0.301064075 | 0.40572054  |
| cg11417598 | SLC2A2      | 3  | 0.02197869 | 0.740199235 | 0.843181631 |
| cg12742826 | SLC30A2;SLC | 1  | 0.00042995 | 0.407123946 | 0.524511462 |
| cg13058819 | SLC35F3     | 1  | 0.01855725 | 0.17065321  | 0.284525289 |
| cg02339793 | SLC38A10;SL | 17 | 0.00271603 | 0.352918943 | 0.542724846 |
| cg07656922 | SLC38A10;SL | 17 | 0.00042068 | 0.282168397 | 0.45654655  |
| cg18025838 | SLC38A10;SL | 17 | 0.00043429 | 0.569694039 | 0.709289393 |
| cg15102609 | SLC38A10;SL | 17 | 0.00259008 | 0.653597827 | 0.790873728 |
| cg22186315 | SLC38A10;SL | 17 | 0.0323598  | 0.552541531 | 0.679591696 |
| cg14621907 | SLC38A10;SL | 17 | 0.03042257 | 0.154222926 | 0.276839167 |
| cg14019146 | SLC38A3     | 3  | 0.04658768 | 0.143181288 | 0.261394798 |
| cg04682699 | SLC38A3     | 3  | 0.01282285 | 0.356696736 | 0.473100241 |
| cg06073139 | SLC38A7     | 16 | 0.00079924 | 0.178124842 | 0.31661557  |
| cg21461745 | SLC39A11;SL | 17 | 0.03297707 | 0.471631892 | 0.63666084  |
| cg24625894 | SLC39A4;SLC | 8  | 0.04808359 | 0.56463422  | 0.672406796 |
| cg22059438 | SLC39A4;SLC | 8  | 0.01215059 | 0.340046159 | 0.465230264 |
| cg26750489 | SLC39A7;HSC | 6  | 0.00061006 | 0.53576469  | 0.763275564 |
| cg25059165 | SLC39A7;HSC | 6  | 0.0011757  | 0.317309015 | 0.505276351 |
| cg02362439 | SLC39A7;HSC | 6  | 0.00122304 | 0.587706702 | 0.717824318 |
| cg21580456 | SLC41A3;SLC | 3  | 0.0009334  | 0.46999723  | 0.609952072 |
| cg27315497 | SLC43A1     | 11 | 0.00026569 | 0.205612586 | 0.370122757 |
| cg09478995 | SLC43A1     | 11 | 0.00470191 | 0.50867979  | 0.633032201 |
| cg17330838 | SLC43A1     | 11 | 0.00288916 | 0.178393195 | 0.293808387 |
| cg09197783 | SLC43A3;SLC | 11 | 0.00888069 | 0.638615765 | 0.762642689 |
| cg17965690 | SLC44A2;SLC | 19 | 0.00089841 | 0.236996316 | 0.380356707 |
| cg21663431 | SLC44A2;SLC | 19 | 0.01484693 | 0.183904666 | 0.311215796 |
| cg25595793 | SLC44A2;SLC | 19 | 0.00035539 | 0.244475576 | 0.362190554 |
| cg06561886 | SLC44A2;SLC | 19 | 0.00077158 | 0.288960534 | 0.443161675 |



|            |             |    |            |             |             |
|------------|-------------|----|------------|-------------|-------------|
| cg06033721 | SLC44A3;SLC | 1  | 0.00203998 | 0.58811997  | 0.737056019 |
| cg27587935 | SLC44A4     | 6  | 0.03738386 | 0.416399792 | 0.531151113 |
| cg19117051 | SLC44A4     | 6  | 0.00449402 | 0.255413006 | 0.361257239 |
| cg01921484 | SLC45A4     | 8  | 0.04514701 | 0.633939245 | 0.897682313 |
| cg15708148 | SLC47A2;SLC | 17 | 0.01083073 | 0.509609098 | 0.625119661 |
| cg24743310 | SLC47A2;SLC | 17 | 0.00297302 | 0.234868192 | 0.34064074  |
| cg22073332 | SLC4A4;SLC4 | 4  | 0.01128764 | 0.554020982 | 0.6702355   |
| cg15966757 | SLC6A13     | 12 | 0.01783536 | 0.43244229  | 0.553143339 |
| cg13763232 | SLC6A6;SLC6 | 3  | 0.00206146 | 0.269575757 | 0.426544565 |
| cg20927312 | SLC6A6;SLC6 | 3  | 0.00526261 | 0.52029274  | 0.623777534 |
| cg04833514 | SLC6A9      | 1  | 0.01128646 | 0.475326638 | 0.585382276 |
| cg10752421 | SLC7A1      | 13 | 0.00396113 | 0.502810333 | 0.659822256 |
| cg26117398 | SLC7A1      | 13 | 0.0037685  | 0.159630135 | 0.307345956 |
| cg26637881 | SLC7A5      | 16 | 0.00062792 | 0.275670179 | 0.454643154 |
| cg04171052 | SLC7A5      | 16 | 0.00310482 | 0.303985827 | 0.475617272 |
| cg06665333 | SLC7A5      | 16 | 0.00067845 | 0.727763103 | 0.846800331 |
| cg03553613 | SLC7A5      | 16 | 0.00141039 | 0.47941151  | 0.579427882 |
| cg12833872 | SLC9A3      | 5  | 0.00158387 | 0.118806902 | 0.241103835 |
| cg01346158 | SLC9A3R2;SL | 16 | 8.11E-05   | 0.610431742 | 0.86778112  |
| cg08074555 | SLC9A3R2;SL | 16 | 0.00142049 | 0.144746759 | 0.285107987 |
| cg03158310 | SLC9A3R2;SL | 16 | 0.0044276  | 0.248090042 | 0.375557568 |
| cg22288315 | SLC9A9      | 3  | 0.00119278 | 0.721296696 | 0.869999764 |
| cg04558907 | SLC9A9      | 3  | 0.01325223 | 0.593293568 | 0.713829141 |
| cg17939401 | SLCO3A1;SLC | 15 | 0.00688243 | 0.254726893 | 0.404088926 |
| cg12043732 | SLCO4A1     | 20 | 0.00747899 | 0.256018145 | 0.368990307 |
| cg26101428 | SLCO6A1     | 5  | 0.00341374 | 0.742273588 | 0.847824789 |
| cg05906024 | SLIT3       | 5  | 0.000105   | 0.393600925 | 0.646161545 |
| cg21953891 | SLIT3       | 5  | 0.00019359 | 0.215566571 | 0.433636311 |
| cg25984601 | SLIT3       | 5  | 0.00023641 | 0.246872282 | 0.453990954 |
| cg17229698 | SLIT3       | 5  | 0.00155177 | 0.382087318 | 0.588361364 |
| cg13008977 | SLIT3       | 5  | 0.00138427 | 0.399370546 | 0.572869248 |
| cg18364770 | SLIT3       | 5  | 0.00032077 | 0.279385564 | 0.403014705 |
| cg22631387 | SLIT3       | 5  | 0.00198029 | 0.640457157 | 0.756821014 |
| cg13908833 | SLIT3       | 5  | 0.00055596 | 0.369123558 | 0.480991194 |
| cg00002426 | SLMAP       | 3  | 0.0024682  | 0.185679979 | 0.308884396 |
| cg20623172 | SLMO2       | 20 | 0.01938614 | 0.564560405 | 0.673011586 |
| cg00718923 | SMAD3;SMA   | 15 | 0.00668008 | 0.281059864 | 0.427904101 |
| cg22589511 | SMAD3;SMA   | 15 | 0.01628038 | 0.234374608 | 0.389411877 |
| cg07033790 | SMAD5;SMA   | 5  | 0.01887236 | 0.627567208 | 0.728720297 |
| cg23172828 | SMAD6;SMA   | 15 | 0.00334158 | 0.623468986 | 0.774956508 |
| cg04093349 | SMAD6;SMA   | 15 | 0.00397229 | 0.555551103 | 0.67956098  |
| cg06103624 | SMAD6;SMA   | 15 | 0.00109578 | 0.559666092 | 0.671554453 |
| cg00350432 | SMAD6;SMA   | 15 | 0.00701584 | 0.389486475 | 0.514238319 |
| cg02184281 | SMAD7       | 18 | 0.00117559 | 0.520490486 | 0.720056974 |
| cg19430553 | SMAD7       | 18 | 0.0189904  | 0.172292261 | 0.336593279 |
| cg13398027 | SMAD7       | 18 | 0.00046086 | 0.620504865 | 0.75274721  |

|            |            |    |            |             |             |
|------------|------------|----|------------|-------------|-------------|
| cg07661480 | SMAD7      | 18 | 0.00019716 | 0.461289764 | 0.573514644 |
| cg08151828 | SMARCA4;SN | 19 | 0.03050099 | 0.294498365 | 0.447307399 |
| cg01634964 | SMARCA4;SN | 19 | 0.00240426 | 0.752719646 | 0.867838612 |
| cg16249827 | SMARCA4;SN | 19 | 0.02782516 | 0.481414535 | 0.59568047  |
| cg27385443 | SMARCA4;SN | 19 | 0.00104629 | 0.272537444 | 0.374267057 |
| cg01982788 | SMARCC2;SN | 12 | 0.01239315 | 0.22011786  | 0.322198237 |
| cg02596233 | SMARCD3;SN | 7  | 0.00127538 | 0.352541211 | 0.49989459  |
| cg14636077 | SMCR5;RAI1 | 17 | 0.00740761 | 0.46735882  | 0.621243162 |
| cg08293097 | SMCR5;RAI1 | 17 | 0.02764881 | 0.231163282 | 0.351747667 |
| cg08593157 | SMCR5;RAI1 | 17 | 0.02248911 | 0.118985885 | 0.229655358 |
| cg06217803 | SMO        | 7  | 0.01566012 | 0.267995705 | 0.374925217 |
| cg02873263 | SMOC1;SMO  | 14 | 0.00027345 | 0.479020938 | 0.63509031  |
| cg18653027 | SMOC1;SMO  | 14 | 0.01433397 | 0.496052417 | 0.622080026 |
| cg23972474 | SMOC1;SMO  | 14 | 0.00589897 | 0.165376685 | 0.280040972 |
| cg22771904 | SMOC2;SMO  | 6  | 0.00015614 | 0.226680799 | 0.567677957 |
| cg10041417 | SMOC2;SMO  | 6  | 0.00056222 | 0.264396316 | 0.505280902 |
| cg24114708 | SMOC2;SMO  | 6  | 0.00497473 | 0.383835251 | 0.579586229 |
| cg04967737 | SMOC2;SMO  | 6  | 0.00070365 | 0.428507635 | 0.623830776 |
| cg17802216 | SMOC2;SMO  | 6  | 0.00130505 | 0.552779478 | 0.742499317 |
| cg09499136 | SMOC2;SMO  | 6  | 0.00502422 | 0.374335799 | 0.559293413 |
| cg25599473 | SMOC2;SMO  | 6  | 0.00673317 | 0.205492896 | 0.385582295 |
| cg21755672 | SMOC2;SMO  | 6  | 0.00115558 | 0.573999737 | 0.750425251 |
| cg02129017 | SMOC2;SMO  | 6  | 0.00116369 | 0.603252079 | 0.748215723 |
| cg13705956 | SMOC2;SMO  | 6  | 0.01484987 | 0.468671791 | 0.605456781 |
| cg08112248 | SMOC2;SMO  | 6  | 0.00688243 | 0.450354299 | 0.586933685 |
| cg19628299 | SMOC2;SMO  | 6  | 0.01200475 | 0.202770254 | 0.336705007 |
| cg15792134 | SMOC2;SMO  | 6  | 0.03067027 | 0.178410613 | 0.311473523 |
| cg15741247 | SMOC2;SMO  | 6  | 0.00115558 | 0.595241334 | 0.727709314 |
| cg04467832 | SMOC2;SMO  | 6  | 0.00109596 | 0.36894589  | 0.500033002 |
| cg22967008 | SMOC2;SMO  | 6  | 0.01251815 | 0.585748489 | 0.715220529 |
| cg14329365 | SMOC2;SMO  | 6  | 0.00178594 | 0.344110254 | 0.473377283 |
| cg12932102 | SMOC2;SMO  | 6  | 0.02343795 | 0.211618772 | 0.338011556 |
| cg26505935 | SMOC2;SMO  | 6  | 0.01643891 | 0.518301902 | 0.642808068 |
| cg07979566 | SMOC2;SMO  | 6  | 0.03255108 | 0.611608048 | 0.725318562 |
| cg03490766 | SMOC2;SMO  | 6  | 0.00651901 | 0.556865218 | 0.665925849 |
| cg02662873 | SMOC2;SMO  | 6  | 0.00177914 | 0.6722876   | 0.778565384 |
| cg01210622 | SMPD3      | 16 | 0.01134181 | 0.340047135 | 0.501170778 |
| cg27045405 | SMPD3      | 16 | 0.00042742 | 0.594226729 | 0.728217659 |
| cg00532477 | SMPD4;SMPI | 2  | 0.00941975 | 0.40025926  | 0.53256912  |
| cg02973057 | SMTN;SMTN  | 22 | 0.00137319 | 0.273110291 | 0.497111289 |
| cg12461735 | SMYD3;SMYI | 1  | 0.00099099 | 0.321676359 | 0.547633815 |
| cg22024479 | SMYD3;SMYI | 1  | 0.00295187 | 0.341790847 | 0.540218348 |
| cg02415020 | SMYD3;SMYI | 1  | 0.00155823 | 0.450777892 | 0.608605671 |
| cg18592195 | SNAP47     | 1  | 0.0061499  | 0.259829635 | 0.425308062 |
| cg05073044 | SNAPC1     | 14 | 0.01046041 | 0.396979238 | 0.594956686 |
| cg20643991 | SNCAIP     | 5  | 0.01115471 | 0.290795383 | 0.447199826 |

|            |             |    |            |             |             |
|------------|-------------|----|------------|-------------|-------------|
| cg11857142 | SND1        | 7  | 0.00050994 | 0.226893962 | 0.400180153 |
| cg00092551 | SND1        | 7  | 0.00230751 | 0.187360307 | 0.354493108 |
| cg22171145 | SND1        | 7  | 0.00248357 | 0.235533967 | 0.397056741 |
| cg14678084 | SND1        | 7  | 0.02515556 | 0.097848372 | 0.254760245 |
| cg25747190 | SND1        | 7  | 0.0069746  | 0.290917383 | 0.414493109 |
| cg00872676 | SND1;MIR59  | 7  | 0.00112584 | 0.516343522 | 0.617545706 |
| cg22635676 | SNED1       | 2  | 0.00049134 | 0.180901939 | 0.391088743 |
| cg23491743 | SNED1       | 2  | 0.00874324 | 0.378739859 | 0.50149336  |
| cg01121603 | SNED1       | 2  | 0.01611597 | 0.570080739 | 0.685040152 |
| cg25241559 | SNED1       | 2  | 0.03496403 | 0.691581595 | 0.800062961 |
| cg09197075 | SNN         | 16 | 0.00064273 | 0.300029835 | 0.437293731 |
| cg21393619 | SNORA27;RP  | 13 | 0.04469567 | 0.109879892 | 0.248109591 |
| cg17628540 | SNORA27;SN  | 13 | 0.00887376 | 0.168762057 | 0.359502242 |
| cg06023161 | SNORA38;BA  | 6  | 0.00073105 | 0.573971742 | 0.686752354 |
| cg23234674 | SNORA74B;A  | 5  | 0.01201723 | 0.186885155 | 0.317856576 |
| cg15889424 | SNORA80;UR  | 21 | 0.00042068 | 0.399140614 | 0.574997608 |
| cg09199848 | SNORA80;UR  | 21 | 0.00324423 | 0.486918852 | 0.606693635 |
| cg15075241 | SNORA80B;C  | 2  | 0.0219062  | 0.569148935 | 0.721375473 |
| cg27565803 | SNORD103A;  | 1  | 0.00046135 | 0.221854066 | 0.419899696 |
| cg24722354 | SNORD103A;  | 1  | 0.01683384 | 0.497725753 | 0.673463815 |
| cg00581541 | SNORD103A;  | 1  | 0.00876577 | 0.626048923 | 0.794854189 |
| cg18598146 | SNORD12B;C  | 20 | 0.01243269 | 0.131169738 | 0.26010259  |
| cg00098985 | SNPH        | 20 | 0.00044333 | 0.22160753  | 0.357938192 |
| cg13399741 | SNPH        | 20 | 0.00074787 | 0.228515308 | 0.356188195 |
| cg01111520 | SNTA1       | 20 | 0.00025542 | 0.423211903 | 0.531752081 |
| cg14992108 | SNTB1       | 8  | 0.00144776 | 0.630529943 | 0.765135775 |
| cg25352714 | SNX1;SNX1;S | 15 | 0.01666074 | 0.507420203 | 0.689739876 |
| cg14556808 | SNX19       | 11 | 0.00070994 | 0.614318097 | 0.800560958 |
| cg08763673 | SNX2        | 5  | 0.00367426 | 0.614572381 | 0.778830095 |
| cg03512808 | SNX29       | 16 | 0.01539972 | 0.476426768 | 0.598943503 |
| cg08073667 | SNX29       | 16 | 0.0089078  | 0.603082866 | 0.716303561 |
| cg20286094 | SNX7;SNX7   | 1  | 0.03696377 | 0.518693171 | 0.644864887 |
| cg12205429 | SNX8        | 7  | 0.01199453 | 0.118648586 | 0.26690995  |
| cg13641082 | SNX8        | 7  | 0.01866421 | 0.14356973  | 0.250500704 |
| cg09672545 | SNX9        | 6  | 0.00445701 | 0.551671837 | 0.718982606 |
| cg14489081 | SNX9        | 6  | 0.01590875 | 0.514074691 | 0.647777588 |
| cg07944936 | SOBP        | 6  | 0.00473569 | 0.11664512  | 0.254813549 |
| cg00429523 | SOBP        | 6  | 0.01745729 | 0.402411548 | 0.538468405 |
| cg18948788 | SOCS5;SOCS5 | 2  | 0.00814962 | 0.18452533  | 0.304277574 |
| cg01123186 | SOCS7       | 17 | 0.0180927  | 0.137237682 | 0.326235745 |
| cg17217443 | SOCS7       | 17 | 0.00684002 | 0.134550365 | 0.307227296 |
| cg25449950 | SOD3;SOD3   | 4  | 0.00144732 | 0.218652731 | 0.354743528 |
| cg05679440 | SOLH        | 16 | 9.39E-05   | 0.410039285 | 0.560184035 |
| cg04076387 | SOLH        | 16 | 0.00088042 | 0.511025335 | 0.64447988  |
| cg05772850 | SOLH        | 16 | 0.01592409 | 0.78135311  | 0.902250525 |
| cg16622520 | SORBS1;SORI | 10 | 0.00099636 | 0.282168042 | 0.461592735 |

|            |             |    |            |             |             |
|------------|-------------|----|------------|-------------|-------------|
| cg06282596 | SORBS1;SORI | 10 | 0.01813562 | 0.182515082 | 0.363047734 |
| cg02370232 | SORBS1;SORI | 10 | 0.00909859 | 0.352412443 | 0.496235053 |
| cg10741308 | SORBS1;SORI | 10 | 0.04960322 | 0.132848178 | 0.239024628 |
| cg12197399 | SORBS2      | 4  | 0.00267898 | 0.293957397 | 0.447198584 |
| cg00028336 | SORBS2      | 4  | 0.0224438  | 0.539289939 | 0.642158671 |
| cg26583078 | SORBS2;SORI | 4  | 0.01797989 | 0.19637858  | 0.385805446 |
| cg19216056 | SORBS2;SORI | 4  | 0.02561382 | 0.217130127 | 0.361113078 |
| cg20761840 | SORBS2;SORI | 4  | 0.02441741 | 0.10480634  | 0.219348577 |
| cg18515303 | SORCS1;SORI | 10 | 0.00136465 | 0.255544163 | 0.396918507 |
| cg18803251 | SORCS2      | 4  | 0.0120603  | 0.641621113 | 0.791915885 |
| cg19593680 | SORCS2      | 4  | 0.01467804 | 0.314891372 | 0.460980301 |
| cg14180415 | SORCS2      | 4  | 0.01522506 | 0.385207916 | 0.523032531 |
| cg23649083 | SORCS2      | 4  | 0.0002881  | 0.375378711 | 0.488465763 |
| cg04733933 | SORCS2      | 4  | 0.04763474 | 0.382119715 | 0.486109414 |
| cg03729818 | SORCS2      | 4  | 0.03059028 | 0.42741988  | 0.527588259 |
| cg15989318 | SORCS3      | 10 | 0.02097693 | 0.177584704 | 0.312574248 |
| cg10107783 | SORL1       | 11 | 0.01571263 | 0.372037982 | 0.50991198  |
| cg01898628 | SOST        | 17 | 0.01475387 | 0.332279676 | 0.480093143 |
| cg10473369 | SOX15       | 17 | 0.0010109  | 0.305600639 | 0.438264863 |
| cg21334045 | SOX5        | 12 | 0.01208271 | 0.479962975 | 0.636608025 |
| cg06205574 | SOX5;SOX5   | 12 | 0.00396543 | 0.432799394 | 0.679364131 |
| cg06764736 | SOX5;SOX5   | 12 | 0.0001951  | 0.658168937 | 0.860139196 |
| cg08992854 | SOX8        | 16 | 0.00018007 | 0.270285821 | 0.574012127 |
| cg26716834 | SOX8        | 16 | 0.00075349 | 0.63812178  | 0.793853722 |
| cg06234051 | SOX9        | 17 | 0.03770747 | 0.172735951 | 0.301672066 |
| cg00414354 | SP3;SP3     | 2  | 0.03224437 | 0.76357514  | 0.879924661 |
| cg02927202 | SP3;SP3     | 2  | 0.02093167 | 0.591055975 | 0.705679781 |
| cg09439817 | SP6;SP6     | 17 | 0.00044333 | 0.169961006 | 0.30752885  |
| cg11927951 | SPAG6;SPAG  | 10 | 0.02181817 | 0.700096378 | 0.811015239 |
| cg23049758 | SPAG9;SPAG  | 17 | 0.00862995 | 0.130844123 | 0.239342997 |
| cg06571753 | SPARC       | 5  | 0.0121202  | 0.339924209 | 0.484394511 |
| cg27460824 | SPATA13;SPA | 13 | 0.00422896 | 0.232648517 | 0.46378016  |
| cg25104266 | SPATA13;SPA | 13 | 0.04228545 | 0.49906826  | 0.634606056 |
| cg01688202 | SPATA2;SPA1 | 20 | 0.0026545  | 0.397665526 | 0.534183385 |
| cg02128278 | SPATA2L     | 16 | 0.00033877 | 0.234471338 | 0.390588139 |
| cg02882004 | SPATS2L;SPA | 2  | 0.00055779 | 0.142233822 | 0.36888497  |
| cg06905367 | SPATS2L;SPA | 2  | 0.02193425 | 0.211420892 | 0.362419295 |
| cg14106933 | SPATS2L;SPA | 2  | 0.01758557 | 0.370066893 | 0.512233798 |
| cg00556627 | SPATS2L;SPA | 2  | 0.03438126 | 0.640510692 | 0.776329606 |
| cg15971761 | SPEG        | 2  | 0.0163769  | 0.558406678 | 0.682149631 |
| cg03030650 | SPEG        | 2  | 0.02078577 | 0.34530058  | 0.46791838  |
| cg13062137 | SPEM1;NLGN  | 17 | 0.00389241 | 0.201574648 | 0.325435381 |
| cg07180355 | SPEN        | 1  | 0.00055717 | 0.523364806 | 0.629150656 |
| cg15754752 | SPG20       | 13 | 0.00115479 | 0.195082098 | 0.487545992 |
| cg05635923 | SPG20       | 13 | 0.00342359 | 0.304984916 | 0.58177421  |
| cg00084432 | SPG20       | 13 | 0.00828199 | 0.15680829  | 0.360754097 |

|            |              |    |            |             |             |
|------------|--------------|----|------------|-------------|-------------|
| cg21484515 | SPG20        | 13 | 0.00587084 | 0.159878487 | 0.348169886 |
| cg21056788 | SPG20        | 13 | 0.00237043 | 0.165256771 | 0.337469695 |
| cg09410612 | SPG20        | 13 | 0.0297894  | 0.267110173 | 0.370137686 |
| cg01279418 | SPG7         | 16 | 0.00259101 | 0.487261244 | 0.661736964 |
| cg01730585 | SPG7;SPG7    | 16 | 0.00046123 | 0.686027828 | 0.817114497 |
| cg02207944 | SPG7;SPG7    | 16 | 0.01815643 | 0.541978966 | 0.67131228  |
| cg01539849 | SPI1;SPI1    | 11 | 0.00478739 | 0.270032013 | 0.424668293 |
| cg14074366 | SPIN1        | 9  | 0.02803426 | 0.167235795 | 0.34145762  |
| cg00401471 | SPINT2;SPIN1 | 19 | 0.04742166 | 0.321415018 | 0.485951274 |
| cg05604800 | SPIRE2       | 16 | 0.00308298 | 0.498320144 | 0.613110698 |
| cg20551922 | SPNS3        | 17 | 9.65E-05   | 0.321094027 | 0.513803088 |
| cg02065148 | SPON2;SPON   | 4  | 0.01442432 | 0.452393491 | 0.561762778 |
| cg01571977 | SPPL2B;SPPL  | 19 | 0.00524631 | 0.27224638  | 0.385681708 |
| cg22854448 | SPRED2       | 2  | 0.00021343 | 0.360574515 | 0.625354133 |
| cg08651590 | SPRED2;SPRE  | 2  | 0.00027715 | 0.224093542 | 0.489486207 |
| cg22369786 | SPRY2        | 13 | 0.04626973 | 0.277831757 | 0.449002529 |
| cg00185066 | SPRY2        | 13 | 0.01877169 | 0.665925769 | 0.792497112 |
| cg18607411 | SPRY2        | 13 | 0.04940661 | 0.157540239 | 0.263910109 |
| cg09256832 | SPSB1        | 1  | 0.00892019 | 0.218363838 | 0.426593509 |
| cg23632432 | SPSB1        | 1  | 0.00029565 | 0.347171227 | 0.531309871 |
| cg24597774 | SPSB1        | 1  | 0.0160999  | 0.162089769 | 0.307868328 |
| cg04778236 | SPSB1        | 1  | 0.03513791 | 0.258902653 | 0.392559547 |
| cg07852840 | SPSB4        | 3  | 0.00341195 | 0.136396545 | 0.281332642 |
| cg26348847 | SPTB         | 14 | 0.00673448 | 0.190165023 | 0.29414995  |
| cg23449231 | SQSTM1;SQS   | 5  | 0.0041687  | 0.39381964  | 0.495550556 |
| cg02531794 | SRCRB4D;ZP3  | 7  | 0.01119163 | 0.319391933 | 0.471506501 |
| cg23875758 | SREBF1;SREB  | 17 | 0.01292091 | 0.173520786 | 0.333737387 |
| cg11014073 | SRGAP1       | 12 | 0.00095485 | 0.309418922 | 0.574424543 |
| cg04938109 | SRGAP1       | 12 | 0.00858634 | 0.422461782 | 0.596011029 |
| cg17354987 | SRGAP1       | 12 | 0.04450589 | 0.532254353 | 0.640076703 |
| cg05811567 | SRGAP2;SRG.  | 1  | 0.04439226 | 0.238576308 | 0.408150359 |
| cg12587213 | SRGAP2;SRG.  | 1  | 0.02149497 | 0.762498321 | 0.868896836 |
| cg16781715 | SRGAP3;SRG.  | 3  | 0.0122034  | 0.816198078 | 0.921721784 |
| cg16645828 | SRRT;SRRT;SI | 7  | 0.00379262 | 0.69314035  | 0.796738194 |
| cg06914270 | SS18L1;GTPB  | 20 | 0.04045673 | 0.693962362 | 0.800489453 |
| cg05905586 | SSBP2        | 5  | 0.00350313 | 0.3315091   | 0.541318638 |
| cg06988422 | SSBP3;SSBP3  | 1  | 0.00151456 | 0.452518116 | 0.624892831 |
| cg24878115 | SSBP4;SSBP4  | 19 | 0.00308431 | 0.345464775 | 0.523692348 |
| cg23544107 | SSBP4;SSBP4  | 19 | 0.00028678 | 0.225758565 | 0.350131536 |
| cg19589652 | SSC5D        | 19 | 0.00042061 | 0.308880107 | 0.446534696 |
| cg11383165 | SSC5D        | 19 | 0.00151748 | 0.412328228 | 0.514484663 |
| cg14338936 | SSH2         | 17 | 0.01179833 | 0.342134677 | 0.526336041 |
| cg06422039 | SSTR5;LOC14  | 16 | 0.00140817 | 0.180974291 | 0.35057557  |
| cg18312113 | SSU72        | 1  | 0.0032518  | 0.540682106 | 0.676731722 |
| cg09073059 | SSU72        | 1  | 0.02459045 | 0.414916476 | 0.524434992 |
| cg24991874 | ST14         | 11 | 0.02326791 | 0.508684457 | 0.642102791 |

|            |              |    |            |             |             |
|------------|--------------|----|------------|-------------|-------------|
| cg05284912 | ST14         | 11 | 0.00815883 | 0.149514765 | 0.265801719 |
| cg04273299 | ST3GAL1;ST3  | 8  | 0.00790901 | 0.523751692 | 0.724515532 |
| cg03965649 | ST3GAL1;ST3  | 8  | 0.00155119 | 0.409310653 | 0.608084477 |
| cg12831076 | ST3GAL1;ST3  | 8  | 0.0135759  | 0.253762076 | 0.419792487 |
| cg11015768 | ST3GAL5      | 2  | 0.00041757 | 0.19150462  | 0.360229915 |
| cg00249584 | ST5;ST5;ST5  | 11 | 0.02085334 | 0.147540577 | 0.296204043 |
| cg11020894 | ST6GAL1;ST6  | 3  | 0.00393627 | 0.226863757 | 0.450947366 |
| cg24528350 | ST6GALNAC5   | 1  | 0.0160111  | 0.697914348 | 0.798013752 |
| cg05720226 | ST7;ST7;ST7C | 7  | 0.00463688 | 0.430567672 | 0.575324208 |
| cg25784872 | STAG1        | 3  | 0.00474503 | 0.431203947 | 0.601022878 |
| cg25038954 | STARD10      | 11 | 0.00542238 | 0.325922598 | 0.445546892 |
| cg03575969 | STARD10      | 11 | 0.0012049  | 0.186668265 | 0.304778567 |
| cg03906031 | STARD10      | 11 | 0.00043674 | 0.598258228 | 0.714532997 |
| cg13860360 | STARD13      | 13 | 0.00145088 | 0.097032463 | 0.224468114 |
| cg01146501 | STARD4       | 5  | 0.04523924 | 0.313842931 | 0.462270443 |
| cg12312086 | STARD9       | 15 | 0.00047154 | 0.37659485  | 0.576689768 |
| cg20173260 | STAT1;STAT1  | 2  | 5.93E-05   | 0.237699174 | 0.54403177  |
| cg14951497 | STAT1;STAT1  | 2  | 0.0461491  | 0.446528449 | 0.583683225 |
| cg12873903 | STAT3;STAT3  | 17 | 0.00479249 | 0.168022897 | 0.288117497 |
| cg19728382 | STC2         | 5  | 0.00719438 | 0.24380866  | 0.366588483 |
| cg07109745 | STIM1        | 11 | 0.00955259 | 0.26091569  | 0.451252354 |
| cg03534504 | STK10        | 5  | 0.00147414 | 0.376449203 | 0.626922595 |
| cg23423191 | STK10        | 5  | 0.00033264 | 0.522281143 | 0.690021286 |
| cg10564791 | STK10        | 5  | 0.00078314 | 0.466181094 | 0.599876595 |
| cg26006084 | STK10        | 5  | 0.0108706  | 0.324722806 | 0.449109137 |
| cg16311462 | STK10        | 5  | 0.00662789 | 0.522244672 | 0.642870581 |
| cg12708735 | STK17A       | 7  | 0.02027555 | 0.744230762 | 0.883559997 |
| cg05828520 | STK19;DOM3   | 6  | 0.04401725 | 0.441405042 | 0.562492082 |
| cg01883966 | STK19;STK19  | 6  | 0.0019999  | 0.319856582 | 0.461971845 |
| cg05626376 | STK19;STK19  | 6  | 0.00043548 | 0.312688826 | 0.436388901 |
| cg16711597 | STK24        | 13 | 0.00017238 | 0.474733776 | 0.699890327 |
| cg09110502 | STK24        | 13 | 0.03343598 | 0.543885324 | 0.690304146 |
| cg01442200 | STK24;STK24  | 13 | 0.00034041 | 0.547911954 | 0.74195699  |
| cg16924565 | STK24;STK24  | 13 | 0.00229588 | 0.514772181 | 0.691749421 |
| cg07340007 | STK24;STK24  | 13 | 0.01502072 | 0.118453202 | 0.272415084 |
| cg11966803 | STK24;STK24  | 13 | 0.01048963 | 0.562496022 | 0.700565221 |
| cg23724635 | STK24;STK24  | 13 | 0.01220112 | 0.672790889 | 0.793485168 |
| cg27447219 | STK24;STK24  | 13 | 0.00207832 | 0.441364288 | 0.542957436 |
| cg10533161 | STK24;STK24  | 13 | 0.00063453 | 0.441770339 | 0.60818908  |
| cg16033410 | STK32C       | 10 | 0.00771385 | 0.488529616 | 0.623890951 |
| cg18518262 | STK32C       | 10 | 0.00339414 | 0.224959663 | 0.34199277  |
| cg18527276 | STK32C       | 10 | 0.0050864  | 0.726739036 | 0.836409587 |
| cg22889514 | STK33        | 11 | 0.04519761 | 0.733594147 | 0.835628973 |
| cg13014866 | STK38L       | 12 | 0.0232546  | 0.604402019 | 0.719953618 |
| cg07992385 | STK39        | 2  | 0.02650704 | 0.219545078 | 0.376673875 |
| cg22585786 | STK39        | 2  | 0.00377308 | 0.300717483 | 0.457797433 |

|            |             |    |            |             |             |
|------------|-------------|----|------------|-------------|-------------|
| cg13431028 | STK39       | 2  | 0.01285639 | 0.214234997 | 0.3680848   |
| cg11775828 | STK39       | 2  | 0.00341549 | 0.246221793 | 0.376870027 |
| cg08262269 | STK39       | 2  | 0.0233802  | 0.760016932 | 0.885476576 |
| cg19848140 | STK39       | 2  | 0.02580413 | 0.107379475 | 0.219916132 |
| cg21899461 | STK39       | 2  | 0.0029884  | 0.149101666 | 0.257033245 |
| cg06631999 | STMN1       | 1  | 0.00032562 | 0.402012721 | 0.609160813 |
| cg21169762 | STON2       | 14 | 0.00997837 | 0.227332318 | 0.3657015   |
| cg26992150 | STOX2       | 4  | 0.00697093 | 0.701923892 | 0.846762289 |
| cg18628646 | STOX2       | 4  | 0.04659857 | 0.158041218 | 0.266593523 |
| cg13668495 | STRBP;STRBP | 9  | 0.02068933 | 0.505462115 | 0.651725009 |
| cg27641801 | STX18       | 4  | 0.00915753 | 0.510118572 | 0.67271995  |
| cg27200466 | STX19;ARL13 | 3  | 0.02578661 | 0.55022306  | 0.68975603  |
| cg02068351 | STX7        | 6  | 0.01060723 | 0.277440751 | 0.40078016  |
| cg04225902 | SUB1        | 5  | 0.01187959 | 0.609249069 | 0.737053254 |
| cg03369906 | SUFU        | 10 | 0.00506552 | 0.166320487 | 0.335527869 |
| cg02662441 | SUFU        | 10 | 0.00167974 | 0.717439825 | 0.845570985 |
| cg10260044 | SULF1;SULF1 | 8  | 0.00028216 | 0.221093149 | 0.469307448 |
| cg01003859 | SULT1C2;SUL | 2  | 0.00287805 | 0.378688946 | 0.53843761  |
| cg15469655 | SUSD5       | 3  | 0.03140044 | 0.128630761 | 0.229721098 |
| cg13508841 | SVEP1       | 9  | 0.02904297 | 0.730767283 | 0.837549311 |
| cg25426867 | SVIL;MIR938 | 10 | 0.00519026 | 0.173215573 | 0.344232732 |
| cg25334461 | SVIL;SVIL   | 10 | 0.02452892 | 0.587680207 | 0.737911477 |
| cg24726783 | SVIL;SVIL   | 10 | 0.00026765 | 0.663408043 | 0.776252229 |
| cg26508239 | SVIL;SVIL   | 10 | 0.00196378 | 0.74360904  | 0.844811192 |
| cg03108697 | SWAP70      | 11 | 0.01412597 | 0.465369661 | 0.675738119 |
| cg08010619 | SWAP70      | 11 | 0.0018333  | 0.24952983  | 0.445347302 |
| cg10023915 | SWAP70      | 11 | 0.01433785 | 0.68194931  | 0.790933922 |
| cg15173428 | SYN3;SYN3;S | 22 | 0.02260917 | 0.316362757 | 0.432446673 |
| cg02836767 | SYNE1;SYNE1 | 6  | 0.01623805 | 0.734854646 | 0.90661993  |
| cg19987354 | SYNE2;SYNE2 | 14 | 0.00144732 | 0.253157103 | 0.523360094 |
| cg02886838 | SYNE2;SYNE2 | 14 | 0.01322903 | 0.1611516   | 0.280778074 |
| cg23250157 | SYNE2;SYNE2 | 14 | 0.03644028 | 0.6827059   | 0.785889249 |
| cg13057576 | SYNE2;SYNE2 | 14 | 0.00907708 | 0.559364747 | 0.680670166 |
| cg01340991 | SYNGAP1     | 6  | 0.0042019  | 0.340090702 | 0.46507248  |
| cg14533068 | SYNJ2       | 6  | 0.0008752  | 0.304933922 | 0.472047576 |
| cg05106892 | SYNM;SYNM   | 15 | 0.00150873 | 0.23548128  | 0.383867304 |
| cg05951351 | SYNM;SYNM   | 15 | 0.00736292 | 0.540801485 | 0.666602055 |
| cg01228193 | SYNPO       | 5  | 0.00047393 | 0.23644281  | 0.469768981 |
| cg26444282 | SYNPO;SYNP  | 5  | 0.0022324  | 0.259967843 | 0.433065494 |
| cg05714559 | SYNPO;SYNP  | 5  | 0.00103787 | 0.269300114 | 0.43726381  |
| cg06559925 | SYNPO;SYNP  | 5  | 0.00031403 | 0.330214006 | 0.494419921 |
| cg16440442 | SYNPO;SYNP  | 5  | 0.04591323 | 0.245500763 | 0.354657281 |
| cg27039501 | SYNPO;SYNP  | 5  | 0.00020704 | 0.399326122 | 0.673630646 |
| cg13991728 | SYNPO;SYNP  | 5  | 0.00099798 | 0.212020713 | 0.457299256 |
| cg01025434 | SYNPO;SYNP  | 5  | 0.01765436 | 0.181568126 | 0.355845144 |
| cg03634767 | SYNPO;SYNP  | 5  | 0.00613784 | 0.49508466  | 0.650672591 |

|            |             |    |            |             |             |
|------------|-------------|----|------------|-------------|-------------|
| cg18416096 | SYNPO;SYNP  | 5  | 0.00011854 | 0.335615577 | 0.450720491 |
| cg05697785 | SYNPO2L     | 10 | 0.00208415 | 0.43976724  | 0.556045828 |
| cg27550918 | SYNPO2L;SYN | 10 | 0.00454463 | 0.305960461 | 0.489032311 |
| cg09575189 | SYT8        | 11 | 0.00035911 | 0.450910551 | 0.598322651 |
| cg24331162 | SYT8        | 11 | 0.00042061 | 0.417239974 | 0.562249118 |
| cg02294791 | SYT8        | 11 | 9.46E-05   | 0.49855153  | 0.639320006 |
| cg21544658 | SYT8        | 11 | 0.00031253 | 0.480371299 | 0.61401323  |
| cg12748890 | SYTL1       | 1  | 0.01304418 | 0.141463547 | 0.282149299 |
| cg03750567 | SYTL1       | 1  | 0.00414726 | 0.278185877 | 0.395167557 |
| cg11123303 | TAAR2       | 6  | 0.02749525 | 0.42342394  | 0.573051642 |
| cg11535638 | TACC2;TACC: | 10 | 0.01512538 | 0.523836173 | 0.668885756 |
| cg02684964 | TACR2       | 10 | 0.00464672 | 0.262201819 | 0.386200087 |
| cg19160958 | TADA2A;TAD  | 17 | 0.00804236 | 0.616809912 | 0.729180661 |
| cg05595429 | TAF1A;TAF1A | 1  | 0.03380036 | 0.256648222 | 0.381981077 |
| cg13257421 | TAF1B       | 2  | 0.03482049 | 0.130610273 | 0.254268329 |
| cg00473045 | TAF2        | 8  | 0.00028199 | 0.162453137 | 0.413442271 |
| cg18848959 | TAF4        | 20 | 3.54E-05   | 0.196405916 | 0.377079772 |
| cg14080585 | TAF4        | 20 | 0.00120709 | 0.1965083   | 0.304671576 |
| cg22778957 | TAF4        | 20 | 0.00356043 | 0.171722142 | 0.279608722 |
| cg08472449 | TANC1;TANC  | 2  | 0.00577904 | 0.230962165 | 0.342892166 |
| cg05269534 | TANK        | 2  | 0.02123792 | 0.796428342 | 0.913770587 |
| cg27447753 | TANK;TANK   | 2  | 0.03543586 | 0.660598309 | 0.797147807 |
| cg00002593 | TAS1R3      | 1  | 0.01408931 | 0.319930507 | 0.468729925 |
| cg22997768 | TAS2R14;PRF | 12 | 0.00516541 | 0.746526322 | 0.864065076 |
| cg22505295 | TAS2R31;PRF | 12 | 0.01890206 | 0.610309822 | 0.73893656  |
| cg23146713 | TAS2R31;TAS | 12 | 0.00679871 | 0.721807104 | 0.828221774 |
| cg10117400 | TBC1D14;TBC | 4  | 0.00632323 | 0.127017879 | 0.265302133 |
| cg16461139 | TBC1D16     | 17 | 0.00109553 | 0.407850907 | 0.642688983 |
| cg17295878 | TBC1D16     | 17 | 0.0010955  | 0.261806626 | 0.460072285 |
| cg11864201 | TBC1D16     | 17 | 0.01542142 | 0.224966335 | 0.422652116 |
| cg23651872 | TBC1D16     | 17 | 0.01606936 | 0.285315866 | 0.475977366 |
| cg12314682 | TBC1D16     | 17 | 0.00036678 | 0.238697188 | 0.412455072 |
| cg13466546 | TBC1D16     | 17 | 0.00116358 | 0.200135855 | 0.370704848 |
| cg21048763 | TBC1D16     | 17 | 0.04142467 | 0.209644171 | 0.369148119 |
| cg19004465 | TBC1D16     | 17 | 0.01461041 | 0.203597517 | 0.362184355 |
| cg03582371 | TBC1D16     | 17 | 0.00037711 | 0.366863056 | 0.525331629 |
| cg06856735 | TBC1D16     | 17 | 0.00175815 | 0.315013144 | 0.466145003 |
| cg09780394 | TBC1D16     | 17 | 0.00686451 | 0.59820865  | 0.740064121 |
| cg26379012 | TBC1D16     | 17 | 0.00050994 | 0.548651036 | 0.681806692 |
| cg26940676 | TBC1D16     | 17 | 0.00075667 | 0.653552006 | 0.782185786 |
| cg09675820 | TBC1D16     | 17 | 0.00189356 | 0.320345908 | 0.447613367 |
| cg24805759 | TBC1D16     | 17 | 0.00328466 | 0.152723279 | 0.272570254 |
| cg25532627 | TBC1D16     | 17 | 0.00043556 | 0.387539313 | 0.505481542 |
| cg12700039 | TBC1D16     | 17 | 0.01942437 | 0.173058144 | 0.289672322 |
| cg17854297 | TBC1D16     | 17 | 0.00126685 | 0.57771995  | 0.689434639 |
| cg00314994 | TBC1D16     | 17 | 0.00509388 | 0.572214447 | 0.676496429 |



|            |             |    |            |             |             |
|------------|-------------|----|------------|-------------|-------------|
| cg10188797 | TBC1D16     | 17 | 0.03849755 | 0.158100274 | 0.259240387 |
| cg07397612 | TBC1D22A    | 22 | 0.00021379 | 0.269968795 | 0.605142917 |
| cg00472758 | TBC1D24     | 16 | 0.00714936 | 0.416909596 | 0.517618916 |
| cg09692364 | TBC1D4      | 13 | 0.00034186 | 0.361005265 | 0.616858207 |
| cg12594615 | TBC1D8      | 2  | 0.00686063 | 0.382906877 | 0.511160665 |
| cg01132502 | TBC1D9B;TB( | 5  | 0.00280453 | 0.343990197 | 0.462178699 |
| cg17662369 | TBC1D9B;TB( | 5  | 0.00214742 | 0.216105089 | 0.332419356 |
| cg01771850 | TBCD        | 17 | 0.00082811 | 0.150904361 | 0.387629793 |
| cg05398905 | TBCD        | 17 | 0.00078986 | 0.163258083 | 0.347576965 |
| cg03535099 | TBCD        | 17 | 0.00049071 | 0.469684489 | 0.647479142 |
| cg02768197 | TBCD        | 17 | 0.00501386 | 0.447310245 | 0.616671646 |
| cg08811443 | TBCD        | 17 | 0.00884201 | 0.718070983 | 0.87369489  |
| cg00830755 | TBCD        | 17 | 0.02752534 | 0.537977096 | 0.693211086 |
| cg11142556 | TBCD        | 17 | 0.02054094 | 0.47975165  | 0.624484418 |
| cg26558799 | TBCD        | 17 | 0.04120014 | 0.256437156 | 0.397217597 |
| cg10310700 | TBCD        | 17 | 0.0012069  | 0.267912463 | 0.378675612 |
| cg05525798 | TBCD        | 17 | 0.0009537  | 0.733432581 | 0.843683205 |
| cg01441018 | TBCD        | 17 | 0.00747078 | 0.485259565 | 0.592255146 |
| cg25399461 | TBCD        | 17 | 0.00658688 | 0.172006283 | 0.273809981 |
| cg17658638 | TBCD        | 17 | 0.00451924 | 0.733137623 | 0.834852093 |
| cg21657704 | TBCD        | 17 | 0.00036376 | 0.54736879  | 0.649029656 |
| cg02395171 | TBCD        | 17 | 0.04708704 | 0.294093122 | 0.394703698 |
| cg25055744 | TBCD;ZNF75( | 17 | 0.0039112  | 0.448428318 | 0.642073306 |
| cg04216936 | TBCK;TBCK;T | 4  | 0.02396641 | 0.566704934 | 0.690035139 |
| cg09771226 | TBKBP1      | 17 | 0.00033544 | 0.17164358  | 0.350162666 |
| cg08452456 | TBKBP1      | 17 | 0.00048831 | 0.240253906 | 0.409470663 |
| cg19784903 | TBKBP1      | 17 | 0.00131124 | 0.176292785 | 0.30082625  |
| cg21339170 | TBL1XR1     | 3  | 0.0467485  | 0.687672205 | 0.791684658 |
| cg23530707 | TBL2        | 7  | 0.01004672 | 0.242862227 | 0.367251083 |
| cg03656099 | TBX2        | 17 | 0.00118547 | 0.247628588 | 0.415180234 |
| cg12999453 | TBX2        | 17 | 0.00769519 | 0.377710522 | 0.479456339 |
| cg09053536 | TBX3;TBX3   | 12 | 0.00782451 | 0.571064109 | 0.780710398 |
| cg13030332 | TBX3;TBX3   | 12 | 0.00411974 | 0.640767014 | 0.820793179 |
| cg11246938 | TBX3;TBX3   | 12 | 0.02665429 | 0.500567575 | 0.654702222 |
| cg09413529 | TBX3;TBX3   | 12 | 0.02033504 | 0.418648478 | 0.532814077 |
| cg05555207 | TBX5;TBX5   | 12 | 0.02415743 | 0.215522104 | 0.417329936 |
| cg06434709 | TBXA2R;TBX/ | 19 | 0.01021423 | 0.700167882 | 0.812152877 |
| cg26407309 | TBXAS1;HIPK | 7  | 0.00154138 | 0.539106084 | 0.67754074  |
| cg13823415 | TBXAS1;TBX/ | 7  | 0.00451873 | 0.630409467 | 0.800533829 |
| cg23759823 | TBXAS1;TBX/ | 7  | 0.00831294 | 0.44644195  | 0.619704886 |
| cg06462921 | TBXAS1;TBX/ | 7  | 0.00194088 | 0.419855318 | 0.588056521 |
| cg09697084 | TBXAS1;TBX/ | 7  | 0.04976881 | 0.624726715 | 0.726740699 |
| cg24348495 | TCEA2;TCEA2 | 20 | 0.00384181 | 0.25260479  | 0.4093725   |
| cg03044302 | TCEA2;TCEA2 | 20 | 0.00037532 | 0.672070983 | 0.807419624 |
| cg03946671 | TCEA2;TCEA2 | 20 | 0.00049054 | 0.159798688 | 0.291915609 |
| cg12176783 | TCEA2;TCEA2 | 20 | 0.00870318 | 0.114410772 | 0.23591713  |

|            |              |    |            |             |             |
|------------|--------------|----|------------|-------------|-------------|
| cg04956806 | TCEA2;TCEA2  | 20 | 0.00696225 | 0.436413664 | 0.539905956 |
| cg12452800 | TCERG1L      | 10 | 0.00565402 | 0.340957582 | 0.488844821 |
| cg01778974 | TCF12;TCF12  | 15 | 0.01345892 | 0.805340431 | 0.919977625 |
| cg20217307 | TCF19;TCF19  | 6  | 0.00303241 | 0.659112582 | 0.811592918 |
| cg03303475 | TCF19;TCF19  | 6  | 0.01847637 | 0.42543149  | 0.530880057 |
| cg20347648 | TCF19;TCF19  | 6  | 0.00720342 | 0.783999865 | 0.886654683 |
| cg14641600 | TCF7;TCF7;TC | 5  | 0.00033491 | 0.617903219 | 0.718981426 |
| cg22207584 | TCF7L1       | 2  | 0.01022815 | 0.429372014 | 0.545778843 |
| cg04743859 | TCIRG1;TCIRG | 11 | 0.00842387 | 0.304617587 | 0.420537563 |
| cg22128896 | TCP11L1;TCP  | 11 | 0.01118456 | 0.506571833 | 0.618865083 |
| cg25878366 | TEAD1        | 11 | 0.00108372 | 0.33306695  | 0.582531653 |
| cg15722533 | TEAD1        | 11 | 0.00991328 | 0.383080226 | 0.553925497 |
| cg18555698 | TEAD1        | 11 | 0.01840259 | 0.391799612 | 0.551038525 |
| cg27240158 | TEAD1        | 11 | 0.03591496 | 0.40106208  | 0.529043913 |
| cg01039401 | TEAD4;TEAD4  | 12 | 0.04737371 | 0.426026478 | 0.53975212  |
| cg24902858 | TECTA        | 11 | 0.00262612 | 0.398621088 | 0.552218015 |
| cg15331500 | TEF;TEF      | 22 | 0.00694443 | 0.187589518 | 0.303734523 |
| cg01709846 | TEKT5        | 16 | 0.01548448 | 0.362397673 | 0.495095832 |
| cg04517903 | TELO2        | 16 | 0.0023765  | 0.665265797 | 0.773280691 |
| cg04402122 | TELO2        | 16 | 0.00513728 | 0.258776467 | 0.364787692 |
| cg00776080 | TENC1;TENC1  | 12 | 0.01199887 | 0.246171898 | 0.349354093 |
| cg16705419 | TENC1;TENC1  | 12 | 0.00020418 | 0.472931567 | 0.590192963 |
| cg04370442 | TEPP;TEPP    | 16 | 8.27E-05   | 0.267302312 | 0.457006901 |
| cg15032025 | TERT;TERT    | 5  | 0.02563497 | 0.721424542 | 0.823304092 |
| cg01093854 | TET1         | 10 | 0.00064112 | 0.339529072 | 0.607155285 |
| cg01355757 | TET3         | 2  | 0.00046135 | 0.549107958 | 0.690146667 |
| cg14962509 | TFAP2E       | 1  | 0.00395367 | 0.301424067 | 0.441026867 |
| cg07296855 | TFDP1;TFDP1  | 13 | 0.00371089 | 0.660180412 | 0.797962161 |
| cg21082644 | TFDP1;TFDP1  | 13 | 0.00372642 | 0.515448658 | 0.647014058 |
| cg18335233 | TG           | 8  | 0.01476941 | 0.407092578 | 0.565987368 |
| cg11155356 | TG;SLA;SLA;S | 8  | 0.00112537 | 0.409065484 | 0.610143739 |
| cg06270049 | TGFBR2;TGFB  | 3  | 0.01419916 | 0.242572419 | 0.448908992 |
| cg05450916 | TGFBR2;TGFB  | 3  | 0.006898   | 0.369346693 | 0.557722981 |
| cg24719910 | TGFBR2;TGFB  | 3  | 0.01403189 | 0.404567914 | 0.565558413 |
| cg21814995 | TGFBR2;TGFB  | 3  | 0.04987898 | 0.408345339 | 0.568127467 |
| cg06784602 | TGFBR2;TGFB  | 3  | 0.02097693 | 0.118257848 | 0.255372266 |
| cg03630790 | TGFBR2;TGFB  | 3  | 0.0159821  | 0.54597918  | 0.682959431 |
| cg12761282 | TGM3         | 20 | 0.02785793 | 0.39472094  | 0.52030998  |
| cg06678594 | THADA;THAL   | 2  | 0.04208809 | 0.498996804 | 0.635518471 |
| cg19211851 | THADA;THAL   | 2  | 0.0483315  | 0.16191873  | 0.276960655 |
| cg21679402 | THAP4        | 2  | 0.02800427 | 0.606740585 | 0.74210933  |
| cg18234606 | THBS1        | 15 | 0.00454312 | 0.27362529  | 0.477096477 |
| cg00836101 | THBS1        | 15 | 0.04192054 | 0.24895026  | 0.427566287 |
| cg14627862 | THBS2        | 6  | 0.00139535 | 0.357968397 | 0.584558911 |
| cg16805094 | THBS2        | 6  | 0.00105217 | 0.308705317 | 0.456612721 |
| cg24391982 | THBS2        | 6  | 0.00059442 | 0.2253911   | 0.340786731 |

|            |              |    |            |             |             |
|------------|--------------|----|------------|-------------|-------------|
| cg22636631 | THBS4        | 5  | 0.02671115 | 0.67910797  | 0.787890671 |
| cg09033577 | THNSL2       | 2  | 0.0114812  | 0.675097597 | 0.790288162 |
| cg24462200 | THOP1        | 19 | 0.00423044 | 0.717478464 | 0.849545887 |
| cg19919217 | THRA         | 17 | 0.02012252 | 0.182023014 | 0.316146323 |
| cg02030908 | THRA;NR1D1   | 17 | 0.00222748 | 0.308493937 | 0.451148114 |
| cg14829516 | THRA;NR1D1   | 17 | 0.03565601 | 0.141355716 | 0.255829728 |
| cg01341751 | THRA;NR1D1   | 17 | 0.00656912 | 0.278434314 | 0.391456279 |
| cg03724728 | THRA;THRA    | 17 | 0.00341742 | 0.327248766 | 0.503426588 |
| cg01190276 | THRB;THRB;T  | 3  | 0.00379557 | 0.418112503 | 0.583866413 |
| cg21864730 | THRSP        | 11 | 0.00028199 | 0.288607839 | 0.498844766 |
| cg16505204 | THRSP        | 11 | 0.0026907  | 0.133280685 | 0.329218072 |
| cg26817145 | THSD4        | 15 | 0.04810873 | 0.364871195 | 0.481953386 |
| cg13726166 | TIAF1;MYO18  | 17 | 0.00514669 | 0.260847115 | 0.414233476 |
| cg17730176 | TIAF1;MYO18  | 17 | 0.00257034 | 0.439002327 | 0.590358069 |
| cg06694381 | TIAM2;TIAM2  | 6  | 0.0045515  | 0.433226416 | 0.624134019 |
| cg18132964 | TIAM2;TIAM2  | 6  | 0.00411751 | 0.216565412 | 0.34997612  |
| cg04228709 | TIAM2;TIAM2  | 6  | 0.0369986  | 0.461847784 | 0.588361427 |
| cg26934881 | TIAM2;TIAM2  | 6  | 0.00800911 | 0.694889158 | 0.797527936 |
| cg21539594 | TIE1         | 1  | 0.00272127 | 0.422626164 | 0.58321666  |
| cg26195652 | TIE1         | 1  | 0.01270728 | 0.528939862 | 0.678209926 |
| cg15106744 | TIPARP       | 3  | 0.02510241 | 0.402360918 | 0.573483061 |
| cg06263077 | TIRAP;TIRAP  | 11 | 0.00200804 | 0.716000125 | 0.821549041 |
| cg07230792 | TJAP1;TJAP1; | 6  | 0.00019359 | 0.388994773 | 0.565640699 |
| cg11553755 | TJAP1;TJAP1; | 6  | 0.00037844 | 0.522001676 | 0.658211121 |
| cg12427941 | TJAP1;TJAP1; | 6  | 0.00133684 | 0.307294957 | 0.435179377 |
| cg25069807 | TK1          | 17 | 0.00021784 | 0.538834102 | 0.726148339 |
| cg06098276 | TK1          | 17 | 0.00401153 | 0.402853431 | 0.538705043 |
| cg03702413 | TLCD1;TLCD1  | 17 | 0.00154461 | 0.277319107 | 0.435417054 |
| cg14199629 | TLE1         | 9  | 0.00452044 | 0.329701782 | 0.527306667 |
| cg14545418 | TLE1         | 9  | 0.01393988 | 0.478994096 | 0.598029796 |
| cg08025415 | TLE2         | 19 | 0.01640518 | 0.257856325 | 0.409274869 |
| cg24772525 | TLK1;TLK1    | 2  | 0.01686295 | 0.649016825 | 0.797678051 |
| cg26227310 | TLX1NB       | 10 | 0.00590464 | 0.307229593 | 0.411022206 |
| cg06800962 | TM4SF1       | 3  | 0.0237442  | 0.204070344 | 0.307460773 |
| cg11568379 | TM4SF4       | 3  | 0.02288285 | 0.428046095 | 0.589418094 |
| cg08378932 | TM4SF4       | 3  | 0.03379374 | 0.160352796 | 0.283470987 |
| cg12874219 | TM4SF4       | 3  | 0.00781604 | 0.739868301 | 0.845698414 |
| cg02898977 | TM9SF1;TM9   | 14 | 0.03108577 | 0.633659714 | 0.876115439 |
| cg23281555 | TM9SF3       | 10 | 0.02671736 | 0.236616942 | 0.378632355 |
| cg05679002 | TMCC1;TMCC   | 3  | 0.02396602 | 0.263527681 | 0.419961621 |
| cg23167246 | TMCO3        | 13 | 0.009436   | 0.181620601 | 0.332173292 |
| cg14534144 | TMCO3        | 13 | 0.01542791 | 0.14637712  | 0.294055224 |
| cg24121069 | TMCO3        | 13 | 0.00445921 | 0.210896471 | 0.358550544 |
| cg01383440 | TMCO3        | 13 | 0.00391879 | 0.78611293  | 0.897638325 |
| cg11312353 | TMCO3        | 13 | 0.02502695 | 0.245482701 | 0.351660235 |
| cg14220777 | TMCO4        | 1  | 0.00262805 | 0.119006901 | 0.249078705 |

|            |            |    |            |             |             |
|------------|------------|----|------------|-------------|-------------|
| cg22355895 | TMED5;TMEI | 1  | 0.00269767 | 0.484874092 | 0.657102504 |
| cg02768480 | TMEM100    | 17 | 0.0137312  | 0.219101534 | 0.346933081 |
| cg10976623 | TMEM100;TI | 17 | 0.01735712 | 0.467497507 | 0.625849515 |
| cg19134130 | TMEM104    | 17 | 0.0474703  | 0.57274533  | 0.680549971 |
| cg11758345 | TMEM105    | 17 | 0.0003561  | 0.541132156 | 0.70493466  |
| cg21735384 | TMEM105    | 17 | 0.00048323 | 0.408089405 | 0.547853618 |
| cg03841376 | TMEM105    | 17 | 0.0034387  | 0.319918701 | 0.456972354 |
| cg22532155 | TMEM105    | 17 | 0.00063366 | 0.464384098 | 0.59540524  |
| cg09695261 | TMEM105    | 17 | 0.00126315 | 0.491938055 | 0.61657716  |
| cg21591452 | TMEM105    | 17 | 0.00140974 | 0.378224016 | 0.502706722 |
| cg06727703 | TMEM105    | 17 | 0.00479817 | 0.341323935 | 0.441697189 |
| cg04865290 | TMEM110    | 3  | 0.04889067 | 0.117298877 | 0.22178365  |
| cg06406157 | TMEM132A;T | 11 | 0.00516027 | 0.256065492 | 0.391295004 |
| cg06630988 | TMEM132B   | 12 | 0.01280327 | 0.335374561 | 0.469599432 |
| cg15936861 | TMEM132D   | 12 | 0.03799239 | 0.24554145  | 0.370817188 |
| cg15012282 | TMEM14E;M  | 3  | 0.04289737 | 0.649131215 | 0.754299747 |
| cg07803856 | TMEM158    | 3  | 0.00491859 | 0.457202458 | 0.560992733 |
| cg00584026 | TMEM175    | 4  | 0.00916622 | 0.269573959 | 0.437998095 |
| cg03424213 | TMEM175    | 4  | 0.00292054 | 0.65182645  | 0.783316843 |
| cg01581326 | TMEM181    | 6  | 0.00287548 | 0.12063532  | 0.323640846 |
| cg12989041 | TMEM181    | 6  | 0.00065412 | 0.66520459  | 0.814671054 |
| cg18201505 | TMEM181    | 6  | 3.77E-05   | 0.169267848 | 0.270892857 |
| cg18648645 | TMEM184A   | 7  | 0.00823479 | 0.739730316 | 0.881409524 |
| cg06693983 | TMEM190    | 19 | 0.01159882 | 0.121514653 | 0.236016615 |
| cg18172186 | TMEM200A;T | 6  | 0.00388699 | 0.470661945 | 0.647399089 |
| cg03890628 | TMEM201    | 1  | 0.00650203 | 0.250596753 | 0.453506122 |
| cg22334684 | TMEM201    | 1  | 0.01718475 | 0.452744763 | 0.556326348 |
| cg15685988 | TMEM201;TI | 1  | 0.00052332 | 0.645796787 | 0.791446514 |
| cg05373161 | TMEM231;TI | 16 | 0.03026486 | 0.15923581  | 0.283137242 |
| cg26618874 | TMEM231;TI | 16 | 0.0102672  | 0.131411922 | 0.239003331 |
| cg15891218 | TMEM30B;TI | 14 | 0.01418892 | 0.154081355 | 0.255137235 |
| cg00175735 | TMEM30C;TI | 3  | 0.01356927 | 0.247328475 | 0.477772932 |
| cg18811916 | TMEM33     | 4  | 0.00969085 | 0.615404021 | 0.751057051 |
| cg13075537 | TMEM57     | 1  | 0.00152622 | 0.166351848 | 0.320444082 |
| cg07192718 | TMEM61     | 1  | 0.00324876 | 0.294397282 | 0.445641904 |
| cg21191255 | TMEM80;TM  | 11 | 0.00182699 | 0.151992591 | 0.259993806 |
| cg12703825 | TMEM82     | 1  | 0.00166587 | 0.255098835 | 0.402491131 |
| cg17977470 | TMEM88     | 17 | 0.00028678 | 0.236153474 | 0.417186202 |
| cg14068176 | TMEM8B;TM  | 9  | 0.00444351 | 0.68711636  | 0.802793886 |
| cg01263574 | TMEM8C     | 9  | 0.00384234 | 0.13458456  | 0.267919327 |
| cg25460340 | TMPRSS5    | 11 | 0.00084896 | 0.489867769 | 0.656499525 |
| cg23871994 | TMPRSS5    | 11 | 0.00037173 | 0.372161422 | 0.525076761 |
| cg15844374 | TMPRSS5    | 11 | 0.00283619 | 0.262979846 | 0.40143498  |
| cg18165914 | TMPRSS5    | 11 | 0.00575903 | 0.221021655 | 0.35002253  |
| cg05183271 | TMPRSS5    | 11 | 0.00741361 | 0.193786579 | 0.320277838 |
| cg23033870 | TMPRSS5    | 11 | 0.00015619 | 0.196777161 | 0.303557507 |

|            |             |    |            |             |             |
|------------|-------------|----|------------|-------------|-------------|
| cg18927181 | TMTC1       | 12 | 0.00117522 | 0.244476033 | 0.532926317 |
| cg06733903 | TMTC1       | 12 | 0.02007157 | 0.181457596 | 0.319886342 |
| cg01401465 | TMTC1       | 12 | 0.02754921 | 0.616386515 | 0.748061027 |
| cg03191794 | TMTC2       | 12 | 0.00210529 | 0.4928654   | 0.686588236 |
| cg18620571 | TNFAIP2     | 14 | 0.00274006 | 0.203697211 | 0.387941604 |
| cg10501093 | TNFAIP2     | 14 | 0.00267351 | 0.200173558 | 0.375953528 |
| cg18587137 | TNFAIP2     | 14 | 0.00201716 | 0.249201452 | 0.401625523 |
| cg08301307 | TNFAIP2     | 14 | 0.00146084 | 0.541533555 | 0.683442744 |
| cg07086380 | TNFAIP8;TNF | 5  | 0.02323426 | 0.28405353  | 0.477053296 |
| cg14918744 | TNFRSF10D   | 8  | 0.03131278 | 0.379883888 | 0.513968599 |
| cg02134720 | TNFRSF11B   | 8  | 0.02754411 | 0.152929776 | 0.312546149 |
| cg26391891 | TNFRSF1A    | 12 | 0.00378841 | 0.431908834 | 0.537123156 |
| cg11665613 | TNFRSF1B    | 1  | 0.00082202 | 0.218616624 | 0.422480164 |
| cg22227034 | TNFRSF1B    | 1  | 0.00741283 | 0.73084698  | 0.839876546 |
| cg26691200 | TNFRSF8     | 1  | 9.51E-05   | 0.463291727 | 0.660812983 |
| cg00569500 | TNFRSF8     | 1  | 0.00584735 | 0.133714933 | 0.28678742  |
| cg08547922 | TNFRSF8     | 1  | 0.01546304 | 0.143530675 | 0.289671002 |
| cg15690400 | TNFRSF8;TNF | 1  | 0.01225889 | 0.3768961   | 0.57647079  |
| cg00463840 | TNFRSF8;TNF | 1  | 0.00776571 | 0.215695866 | 0.357124644 |
| cg18152455 | TNFRSF8;TNF | 1  | 0.0155826  | 0.496352396 | 0.618287627 |
| cg07499259 | TNFRSF8;TNF | 1  | 0.01284951 | 0.384431422 | 0.499596345 |
| cg10425291 | TNFRSF8;TNF | 1  | 0.00060096 | 0.628709303 | 0.73664469  |
| cg08269671 | TNFSF11;TNF | 13 | 0.03317083 | 0.804044422 | 0.904810293 |
| cg17267493 | TNFSF12;TNF | 17 | 0.00138644 | 0.529428021 | 0.662120952 |
| cg23321140 | TNIP1       | 5  | 0.01050581 | 0.131422757 | 0.281926639 |
| cg09813400 | TNIP1       | 5  | 0.00030136 | 0.442379568 | 0.553920482 |
| cg25737411 | TNK1        | 17 | 0.02955222 | 0.471937009 | 0.580616793 |
| cg08048178 | TNK2;TNK2   | 3  | 0.00037177 | 0.582581822 | 0.871444513 |
| cg08767936 | TNK2;TNK2   | 3  | 0.00012823 | 0.324582339 | 0.603248742 |
| cg21553700 | TNK2;TNK2   | 3  | 0.00114074 | 0.579807153 | 0.786879118 |
| cg20092936 | TNK2;TNK2   | 3  | 0.00283871 | 0.53389023  | 0.707447353 |
| cg00190795 | TNK2;TNK2   | 3  | 0.00202728 | 0.253918814 | 0.399865168 |
| cg01006102 | TNK2;TNK2   | 3  | 0.00792961 | 0.2240614   | 0.342786916 |
| cg10843210 | TNK2;TNK2   | 3  | 0.04374853 | 0.440758428 | 0.547380579 |
| cg27024515 | TNNC1;NISCH | 3  | 0.02603654 | 0.515029495 | 0.657339349 |
| cg15662902 | TNNI2;TNNI2 | 11 | 0.00445792 | 0.547234041 | 0.652939293 |
| cg19233001 | TNNT2;TNNT  | 1  | 0.00131801 | 0.387433228 | 0.497887168 |
| cg01821149 | TNNT3;TNNT  | 11 | 0.0341447  | 0.34392649  | 0.456437825 |
| cg18314765 | TNP1        | 2  | 0.00322533 | 0.40352035  | 0.640654851 |
| cg20310485 | TNP1        | 2  | 0.01855725 | 0.322122027 | 0.509443416 |
| cg19384546 | TNP1        | 2  | 0.01651706 | 0.277748605 | 0.417092899 |
| cg02011723 | TNPO2;TNPC  | 19 | 0.00224433 | 0.168498834 | 0.290303877 |
| cg06947694 | TNRC18      | 7  | 0.00029882 | 0.492466446 | 0.687477564 |
| cg00795125 | TNRC18      | 7  | 0.003901   | 0.483271071 | 0.667232895 |
| cg14517056 | TNRC18      | 7  | 0.00684618 | 0.580364594 | 0.750679456 |
| cg20025824 | TNRC18      | 7  | 0.00577668 | 0.54022627  | 0.678562717 |

|            |            |    |            |             |             |
|------------|------------|----|------------|-------------|-------------|
| cg23058673 | TNRC18     | 7  | 0.0030844  | 0.335004616 | 0.462127822 |
| cg10327399 | TNRC18     | 7  | 0.00262542 | 0.537928827 | 0.661214572 |
| cg12845678 | TNRC18     | 7  | 0.0002104  | 0.669949382 | 0.778982735 |
| cg09518219 | TNRC18     | 7  | 0.00637228 | 0.612635439 | 0.721201732 |
| cg06420129 | TNRC6A     | 16 | 0.0008433  | 0.274398938 | 0.439952085 |
| cg09029192 | TNRC6C;TNR | 17 | 0.00057456 | 0.517986354 | 0.642363912 |
| cg12731010 | TNS1       | 2  | 0.01409581 | 0.309141458 | 0.459838311 |
| cg12681370 | TNS1       | 2  | 0.0001554  | 0.191699021 | 0.312713301 |
| cg03958512 | TNS3       | 7  | 6.44E-05   | 0.465924945 | 0.755704195 |
| cg27275374 | TNS3       | 7  | 0.00679871 | 0.344466675 | 0.528450209 |
| cg12292947 | TNS3       | 7  | 0.00023272 | 0.214253249 | 0.398000057 |
| cg14410503 | TNS3       | 7  | 0.00096693 | 0.211717951 | 0.395173124 |
| cg20782724 | TNS3       | 7  | 0.00052049 | 0.59463992  | 0.750711878 |
| cg00830492 | TNS3       | 7  | 0.01499883 | 0.130821294 | 0.275098864 |
| cg13800949 | TNS3       | 7  | 0.00160485 | 0.280794168 | 0.424897152 |
| cg27525731 | TNS3       | 7  | 0.00088441 | 0.376671727 | 0.511015736 |
| cg06871974 | TNS3       | 7  | 0.03422182 | 0.43973621  | 0.56095794  |
| cg23694490 | TNS3       | 7  | 0.01236446 | 0.122707952 | 0.240460596 |
| cg04757901 | TNXB       | 6  | 0.00476641 | 0.283491118 | 0.532099749 |
| cg14924781 | TNXB       | 6  | 0.01664988 | 0.353944798 | 0.572932091 |
| cg25854703 | TNXB       | 6  | 0.00173253 | 0.491910568 | 0.702559644 |
| cg20407792 | TNXB       | 6  | 0.00290729 | 0.143993307 | 0.348971427 |
| cg02151997 | TNXB       | 6  | 0.01437084 | 0.386892283 | 0.58592138  |
| cg16834823 | TNXB       | 6  | 0.00365643 | 0.307036037 | 0.496020736 |
| cg10365886 | TNXB       | 6  | 0.01185514 | 0.448738087 | 0.633069775 |
| cg17806717 | TNXB       | 6  | 0.02934609 | 0.333526682 | 0.499225378 |
| cg14669361 | TNXB       | 6  | 0.00214327 | 0.166977744 | 0.330319217 |
| cg23186098 | TNXB       | 6  | 0.00498538 | 0.26401883  | 0.425863589 |
| cg12694372 | TNXB       | 6  | 0.03242895 | 0.368891572 | 0.529327326 |
| cg16318036 | TNXB       | 6  | 0.00556595 | 0.379944722 | 0.539920454 |
| cg03822479 | TNXB       | 6  | 0.0025767  | 0.574622608 | 0.733467212 |
| cg13798746 | TNXB       | 6  | 0.0032053  | 0.14806936  | 0.305676253 |
| cg19609334 | TNXB       | 6  | 0.0006885  | 0.449857261 | 0.607346667 |
| cg00979704 | TNXB       | 6  | 0.00292525 | 0.132869852 | 0.28782892  |
| cg14188106 | TNXB       | 6  | 0.01335501 | 0.33060625  | 0.483036132 |
| cg14196170 | TNXB       | 6  | 0.00280651 | 0.366709841 | 0.519021424 |
| cg15196197 | TNXB       | 6  | 0.00993519 | 0.233432529 | 0.381009228 |
| cg01992382 | TNXB       | 6  | 0.01612065 | 0.237615198 | 0.383528158 |
| cg25772658 | TNXB       | 6  | 0.0154911  | 0.358284353 | 0.500987456 |
| cg10923662 | TNXB       | 6  | 0.02172721 | 0.243761244 | 0.385940671 |
| cg04389484 | TNXB       | 6  | 0.01305743 | 0.624247432 | 0.755809257 |
| cg15745284 | TNXB       | 6  | 0.00408683 | 0.525850781 | 0.657038399 |
| cg24882324 | TNXB       | 6  | 0.02037755 | 0.324682552 | 0.455550553 |
| cg08650890 | TNXB       | 6  | 0.01497747 | 0.371164838 | 0.497236032 |
| cg01485117 | TNXB       | 6  | 0.01592034 | 0.286293576 | 0.40941699  |
| cg08660959 | TNXB       | 6  | 0.01810467 | 0.245892939 | 0.368699234 |

|            |            |    |            |             |             |
|------------|------------|----|------------|-------------|-------------|
| cg07485305 | TNXB       | 6  | 0.02949675 | 0.121733679 | 0.239697995 |
| cg26266427 | TNXB       | 6  | 0.01771533 | 0.380230435 | 0.497718414 |
| cg19267551 | TNXB       | 6  | 0.02517392 | 0.326541554 | 0.443051698 |
| cg02133510 | TNXB       | 6  | 0.01021957 | 0.147973125 | 0.261930665 |
| cg03130418 | TNXB       | 6  | 0.01432868 | 0.337493104 | 0.451118348 |
| cg19736604 | TNXB       | 6  | 0.00538325 | 0.70249256  | 0.816028143 |
| cg22402769 | TNXB       | 6  | 0.0030062  | 0.764744922 | 0.878045837 |
| cg17031787 | TNXB       | 6  | 0.00261962 | 0.228046634 | 0.341297307 |
| cg02989255 | TNXB       | 6  | 0.0099408  | 0.325802031 | 0.438352945 |
| cg00617292 | TNXB       | 6  | 0.01619517 | 0.123736238 | 0.235015988 |
| cg21642103 | TNXB       | 6  | 0.00682821 | 0.281059202 | 0.392161601 |
| cg20113726 | TNXB       | 6  | 0.01102386 | 0.64856288  | 0.758989324 |
| cg27073361 | TNXB       | 6  | 0.01828816 | 0.094200084 | 0.203192278 |
| cg11289677 | TNXB       | 6  | 0.03074873 | 0.218149376 | 0.326445955 |
| cg23145336 | TNXB       | 6  | 0.01586899 | 0.090644553 | 0.198532523 |
| cg25596754 | TNXB       | 6  | 0.0297948  | 0.109077439 | 0.216709481 |
| cg24506088 | TNXB       | 6  | 0.00596341 | 0.66309854  | 0.768715144 |
| cg13698691 | TNXB       | 6  | 0.0273597  | 0.269687918 | 0.375190399 |
| cg23462632 | TNXB       | 6  | 0.00357929 | 0.182924432 | 0.286167937 |
| cg21042276 | TNXB       | 6  | 0.00283871 | 0.137768099 | 0.239760859 |
| cg23994443 | TNXB       | 6  | 0.02924174 | 0.45864692  | 0.559838149 |
| cg21951797 | TNXB       | 6  | 0.0349496  | 0.135965342 | 0.237028177 |
| cg24884217 | TNXB       | 6  | 0.01899352 | 0.105670953 | 0.206205399 |
| cg01337207 | TNXB       | 6  | 0.03873731 | 0.3911766   | 0.491483214 |
| cg13739666 | TNXB;TNXB  | 6  | 0.00015801 | 0.343786063 | 0.485138466 |
| cg26537323 | TNXB;TNXB  | 6  | 0.00069753 | 0.283129207 | 0.418701835 |
| cg22050611 | TOLLIP     | 11 | 0.000105   | 0.298141552 | 0.539100282 |
| cg03466237 | TOLLIP     | 11 | 0.00729124 | 0.42745092  | 0.642619094 |
| cg05311626 | TOLLIP     | 11 | 0.00068807 | 0.146521947 | 0.357966826 |
| cg24186398 | TOLLIP     | 11 | 0.00231134 | 0.438522778 | 0.643897079 |
| cg03044471 | TOLLIP     | 11 | 0.00056439 | 0.313786907 | 0.472531858 |
| cg17092096 | TOLLIP     | 11 | 0.00090657 | 0.287344404 | 0.435915714 |
| cg10696445 | TOLLIP     | 11 | 0.00152622 | 0.273148089 | 0.410017182 |
| cg23178186 | TOLLIP     | 11 | 0.01789413 | 0.598546133 | 0.730821475 |
| cg23041020 | TOLLIP     | 11 | 0.01050581 | 0.344094422 | 0.4746521   |
| cg12601909 | TOLLIP     | 11 | 0.00057818 | 0.628497541 | 0.751363412 |
| cg26779330 | TOLLIP     | 11 | 0.00742514 | 0.29168438  | 0.40819206  |
| cg13843417 | TOLLIP     | 11 | 0.04947586 | 0.524861861 | 0.63915058  |
| cg24874557 | TOLLIP     | 11 | 0.00309783 | 0.658976489 | 0.772169004 |
| cg27232494 | TOM1L2;TOM | 17 | 0.01049394 | 0.273693408 | 0.396623428 |
| cg11841863 | TOP2B      | 3  | 0.01041379 | 0.716356746 | 0.86476483  |
| cg06832551 | TOR1AIP1   | 1  | 0.01005565 | 0.743163834 | 0.850403926 |
| cg17591574 | TOR3A      | 1  | 0.00377864 | 0.184204009 | 0.380569069 |
| cg08432383 | TP53AIP1   | 11 | 0.03619402 | 0.184054312 | 0.294507345 |
| cg04498198 | TP53I13    | 17 | 0.01485553 | 0.19497461  | 0.323692488 |
| cg05877788 | TP53I13    | 17 | 0.00093748 | 0.154443824 | 0.273360449 |

|            |              |    |            |             |             |
|------------|--------------|----|------------|-------------|-------------|
| cg20598650 | TP53RK;SLC1  | 20 | 0.01987578 | 0.211248868 | 0.365620982 |
| cg03760518 | TP73;TP73;TI | 1  | 0.00212315 | 0.301418467 | 0.408309253 |
| cg10256045 | TPCN2        | 11 | 0.00054953 | 0.203413101 | 0.464924881 |
| cg18053228 | TPCN2        | 11 | 0.00381231 | 0.135850252 | 0.30431822  |
| cg08847919 | TPCN2        | 11 | 0.00089041 | 0.501388043 | 0.667111444 |
| cg06624991 | TPCN2        | 11 | 0.00427162 | 0.634276236 | 0.755603307 |
| cg08192033 | TPD52L1;TPC  | 6  | 0.02749086 | 0.237693958 | 0.382907403 |
| cg02807882 | TPD52L1;TPC  | 6  | 0.01929151 | 0.215925896 | 0.348268445 |
| cg22546122 | TPM4         | 19 | 0.00350029 | 0.136477894 | 0.276408696 |
| cg27174787 | TPM4         | 19 | 0.00437502 | 0.166207474 | 0.298807975 |
| cg17518079 | TPO;TPO;TPC  | 2  | 0.01963377 | 0.508059558 | 0.614667853 |
| cg01950495 | TPPP         | 5  | 0.00052921 | 0.262336418 | 0.444243292 |
| cg18389810 | TPPP2        | 14 | 0.00329335 | 0.197149607 | 0.346670667 |
| cg05416180 | TPRG1        | 3  | 0.02078415 | 0.137309965 | 0.257890914 |
| cg04108240 | TRA2A        | 7  | 0.04402539 | 0.582755825 | 0.685061136 |
| cg22804499 | TRA2B        | 3  | 0.01697425 | 0.639760062 | 0.74458321  |
| cg13597809 | TRAF2        | 9  | 0.00037532 | 0.316822065 | 0.47098739  |
| cg00827663 | TRAF2        | 9  | 0.00758387 | 0.653254828 | 0.788875706 |
| cg04987122 | TRAF7        | 16 | 0.00106511 | 0.290539913 | 0.415854413 |
| cg01636300 | TRAF7        | 16 | 0.00328249 | 0.781330287 | 0.888422501 |
| cg18372196 | TRAM2        | 6  | 0.0077052  | 0.363758937 | 0.526407917 |
| cg11723904 | TRAP1        | 16 | 0.00922791 | 0.48950091  | 0.665856526 |
| cg20946943 | TRAPPC9;TR/  | 8  | 0.00457044 | 0.330391494 | 0.543353296 |
| cg18219994 | TRAPPC9;TR/  | 8  | 0.00042158 | 0.405553415 | 0.58676891  |
| cg03282105 | TRAPPC9;TR/  | 8  | 0.00017629 | 0.283859537 | 0.449459523 |
| cg02528189 | TRAPPC9;TR/  | 8  | 0.0017987  | 0.317925132 | 0.453141936 |
| cg17290943 | TRAPPC9;TR/  | 8  | 0.004603   | 0.585834753 | 0.717137437 |
| cg08504029 | TRAPPC9;TR/  | 8  | 0.00584864 | 0.358231807 | 0.489109273 |
| cg24317069 | TRAPPC9;TR/  | 8  | 0.00066001 | 0.650384711 | 0.763298095 |
| cg24388061 | TRAPPC9;TR/  | 8  | 0.03392751 | 0.232058987 | 0.343975697 |
| cg27572854 | TRAT1        | 3  | 0.00017144 | 0.68222001  | 0.843475576 |
| cg05583014 | TREX1;TREX1  | 3  | 0.00053721 | 0.443583594 | 0.603682236 |
| cg21217577 | TRH          | 3  | 0.00427832 | 0.139767888 | 0.265803477 |
| cg14023589 | TRHDE        | 12 | 0.01979016 | 0.695705949 | 0.823343254 |
| cg08322448 | TRIM2;TRIM/  | 4  | 0.00153125 | 0.575346317 | 0.738733504 |
| cg05850884 | TRIM26       | 6  | 0.02567467 | 0.279701376 | 0.381532547 |
| cg12600843 | TRIM26       | 6  | 0.01448667 | 0.520761641 | 0.621725346 |
| cg18907454 | TRIM27       | 6  | 0.00295288 | 0.679842928 | 0.795304098 |
| cg27351624 | TRIM31       | 6  | 0.00147368 | 0.478338082 | 0.658087113 |
| cg00787996 | TRIM31       | 6  | 0.00269957 | 0.545665808 | 0.696677444 |
| cg22262055 | TRIM38       | 6  | 0.01439279 | 0.462141461 | 0.618100183 |
| cg05832509 | TRIM4;TRIM/  | 7  | 0.04352763 | 0.174797978 | 0.276670348 |
| cg00059643 | TRIM41;TRIN  | 5  | 0.00275397 | 0.338881582 | 0.44992944  |
| cg20908326 | TRIM44       | 11 | 0.00233006 | 0.745507458 | 0.845806115 |
| cg20302637 | TRIM46;KRTC  | 1  | 0.02958757 | 0.324875252 | 0.432983125 |
| cg12077698 | TRIM62       | 1  | 0.00015133 | 0.376184661 | 0.633504637 |



|            |               |    |            |             |             |
|------------|---------------|----|------------|-------------|-------------|
| cg03306027 | TRIM62        | 1  | 0.00058876 | 0.23283031  | 0.369280168 |
| cg26780705 | TRIM65        | 17 | 0.00168317 | 0.16597027  | 0.284095679 |
| cg10927422 | TRIM65        | 17 | 0.00508947 | 0.597643514 | 0.700341329 |
| cg00608540 | TRIM7;TRIM7   | 5  | 8.11E-05   | 0.364576443 | 0.505040714 |
| cg23367683 | TRIM7;TRIM7   | 5  | 0.01234666 | 0.524435841 | 0.652392825 |
| cg17279652 | TRIM7;TRIM7   | 5  | 0.0019814  | 0.662178163 | 0.762475058 |
| cg06379532 | TRIM71        | 3  | 0.00466328 | 0.327691381 | 0.499223694 |
| cg16550500 | TRIM9;TRIM9   | 14 | 0.01417898 | 0.791488693 | 0.902269719 |
| cg10179300 | TRIO          | 5  | 0.00070692 | 0.577730872 | 0.766365089 |
| cg10999410 | TRIO          | 5  | 0.00012533 | 0.664043705 | 0.767500957 |
| cg09258877 | TRIP12        | 2  | 0.02217629 | 0.280384874 | 0.457355667 |
| cg00255699 | TRIT1         | 1  | 0.02156655 | 0.444696276 | 0.565031115 |
| cg22126499 | TRMT2A;TRM    | 22 | 0.000652   | 0.322856813 | 0.461670716 |
| cg01852238 | TRPC4AP;TRP   | 20 | 0.00463909 | 0.442461103 | 0.625745495 |
| cg00530568 | TRPC7;TRPC7   | 5  | 0.00259294 | 0.387571658 | 0.574274367 |
| cg18225577 | TRPM4         | 19 | 5.62E-05   | 0.151931593 | 0.378451811 |
| cg03716852 | TRPM4         | 19 | 0.00042068 | 0.209783004 | 0.368777729 |
| cg10002185 | TRPM4         | 19 | 0.01403313 | 0.237472034 | 0.38693372  |
| cg03330762 | TRPM4         | 19 | 0.00447527 | 0.263741603 | 0.382110615 |
| cg14220181 | TRPM8         | 2  | 0.00085408 | 0.210750115 | 0.364124336 |
| cg07379888 | TRPM8         | 2  | 0.00284684 | 0.693227317 | 0.846128109 |
| cg07371504 | TRPV3         | 17 | 0.04472058 | 0.283469848 | 0.425613158 |
| cg21465150 | TRPV3         | 17 | 0.02461658 | 0.423360795 | 0.525694849 |
| cg26358374 | TRPV4;TRPV4   | 12 | 0.00577668 | 0.142898103 | 0.300395366 |
| cg04717595 | TRPV4;TRPV4   | 12 | 0.00328758 | 0.14231875  | 0.260163443 |
| cg12765716 | TRPV4;TRPV4   | 12 | 0.00166834 | 0.132740236 | 0.235246559 |
| cg09486642 | TRPV6         | 7  | 0.01910129 | 0.281814584 | 0.386769594 |
| cg03151191 | TRRAP         | 7  | 0.03369563 | 0.608048812 | 0.711953567 |
| cg01769813 | TSC2;TSC2;TSC | 16 | 0.00642404 | 0.336143601 | 0.517835244 |
| cg08936056 | TSC2;TSC2;TSC | 16 | 0.00652368 | 0.305738769 | 0.46965779  |
| cg07675656 | TSC2;TSC2;TSC | 16 | 0.0086439  | 0.25790634  | 0.41837535  |
| cg02364279 | TSC2;TSC2;TSC | 16 | 0.00279548 | 0.406485521 | 0.538046652 |
| cg05626094 | TSC2;TSC2;TSC | 16 | 0.00114854 | 0.602258039 | 0.729737438 |
| cg07730183 | TSC2;TSC2;TSC | 16 | 0.00455256 | 0.569759734 | 0.672546516 |
| cg22497575 | TSC22D1       | 13 | 0.01270566 | 0.155552934 | 0.314859292 |
| cg03097389 | TSC22D1;TSC   | 13 | 0.0217075  | 0.123132381 | 0.292602979 |
| cg00866186 | TSEN54        | 17 | 0.01258486 | 0.319238709 | 0.443991485 |
| cg23196081 | TSGA10IP;TSG  | 11 | 0.00610397 | 0.176083961 | 0.282857631 |
| cg21663359 | TSNARE1       | 8  | 0.00421105 | 0.223586778 | 0.366309329 |
| cg25247409 | TSNARE1       | 8  | 0.0030318  | 0.19064544  | 0.326307079 |
| cg05812666 | TSNAX-DISC1   | 1  | 0.04043573 | 0.738112762 | 0.845135235 |
| cg20852945 | TSPAN18       | 11 | 0.04905188 | 0.31349857  | 0.44154656  |
| cg09663584 | TSPAN3;TSPAN  | 15 | 0.00434916 | 0.743066254 | 0.852128736 |
| cg18044967 | TSPAN32       | 11 | 0.00830494 | 0.333975018 | 0.472935446 |
| cg13614606 | TSPAN4;TSPAN  | 11 | 6.85E-05   | 0.532115163 | 0.699829146 |
| cg13992402 | TSPAN4;TSPAN  | 11 | 0.00716406 | 0.413003831 | 0.548271207 |

|            |              |    |            |             |             |
|------------|--------------|----|------------|-------------|-------------|
| cg13071185 | TSPAN4;TSPA  | 11 | 0.00114616 | 0.301182144 | 0.435198745 |
| cg17998346 | TSPAN4;TSPA  | 11 | 0.00015759 | 0.536650542 | 0.650022324 |
| cg23246886 | TSPAN5       | 4  | 0.00060157 | 0.591568176 | 0.754063294 |
| cg09296942 | TSPAN5       | 4  | 0.0092796  | 0.335840059 | 0.495121979 |
| cg10493055 | TSPAN5       | 4  | 0.02474541 | 0.324093129 | 0.459193761 |
| cg00615469 | TSPAN5       | 4  | 0.03361069 | 0.194311413 | 0.32360006  |
| cg20639398 | TSPAN9;TSPA  | 12 | 0.00085003 | 0.616260487 | 0.73185723  |
| cg25672027 | TSPO;TSPO    | 22 | 0.00122333 | 0.361466749 | 0.552995159 |
| cg06766636 | TSPYL1;TSPYI | 6  | 0.02592301 | 0.28999577  | 0.404900141 |
| cg03646994 | TSSC1        | 2  | 0.02144994 | 0.368717447 | 0.521012893 |
| cg04951371 | TSSC1        | 2  | 0.0001566  | 0.242021506 | 0.392966126 |
| cg14461974 | TSSC1        | 2  | 0.00109287 | 0.450033903 | 0.573974546 |
| cg19536922 | TSSC1        | 2  | 0.00166145 | 0.704319365 | 0.823218489 |
| cg11685249 | TSSK1B;MCC   | 5  | 0.00090542 | 0.396612653 | 0.569637722 |
| cg12898512 | TSTD1;TSTD1  | 1  | 0.00368527 | 0.583203097 | 0.760797437 |
| cg12392225 | TTC15        | 2  | 0.00656059 | 0.092385525 | 0.307614692 |
| cg27639897 | TTC15        | 2  | 0.01392652 | 0.141063449 | 0.348173686 |
| cg25714774 | TTC15        | 2  | 0.00047964 | 0.642141051 | 0.793326254 |
| cg25113123 | TTC15        | 2  | 0.00053985 | 0.542913214 | 0.672420442 |
| cg05989746 | TTC15        | 2  | 0.00608572 | 0.685480893 | 0.793759467 |
| cg21858320 | TTC15        | 2  | 0.01243277 | 0.357367558 | 0.463996295 |
| cg15645660 | TTC22        | 1  | 0.00116614 | 0.243116653 | 0.414145122 |
| cg19022697 | TTC22        | 1  | 0.00033877 | 0.183395787 | 0.34329035  |
| cg05000598 | TTC24        | 1  | 0.04409128 | 0.319638416 | 0.430001792 |
| cg05401069 | TTC39C       | 18 | 0.0233306  | 0.139614351 | 0.336497474 |
| cg18719665 | TTC39C       | 18 | 0.0348372  | 0.107036493 | 0.27398342  |
| cg11222440 | TTC7A        | 2  | 0.00153474 | 0.35389724  | 0.568363558 |
| cg04437845 | TTC7A        | 2  | 0.00064269 | 0.524190879 | 0.667997203 |
| cg23978866 | TTC7A        | 2  | 0.03995761 | 0.203004815 | 0.331138416 |
| cg06528816 | TTC7A        | 2  | 0.00558142 | 0.301600349 | 0.425403938 |
| cg22321808 | TTC7A        | 2  | 0.00314371 | 0.130787247 | 0.242657577 |
| cg10062874 | TTC7B        | 14 | 0.01861595 | 0.220166691 | 0.419138293 |
| cg09363076 | TTC7B        | 14 | 0.01048521 | 0.525670671 | 0.684846518 |
| cg04458567 | TTL          | 2  | 0.02144383 | 0.457165302 | 0.614808596 |
| cg05545910 | TTL1;TTL1    | 22 | 4.44E-05   | 0.415883271 | 0.622251205 |
| cg21184518 | TTL11;TTL1   | 9  | 0.03553947 | 0.299258065 | 0.436297232 |
| cg01910478 | TTL5         | 14 | 0.02497208 | 0.148900313 | 0.256285414 |
| cg24687102 | TTYH1;TTYH1  | 19 | 0.00022269 | 0.637470515 | 0.738902093 |
| cg10087754 | TTYH3        | 7  | 0.02498457 | 0.229548944 | 0.370499403 |
| cg23568324 | TTYH3        | 7  | 0.01419249 | 0.168657537 | 0.280501438 |
| cg22788953 | TTYH3        | 7  | 0.01806525 | 0.275351259 | 0.384305142 |
| cg05519002 | TUB;TUB      | 11 | 0.0002122  | 0.30149097  | 0.488835204 |
| cg10133610 | TUBB2B       | 6  | 0.03422125 | 0.486075245 | 0.632679488 |
| cg11269895 | TUBGCP3      | 13 | 0.01990433 | 0.720453505 | 0.8313403   |
| cg10724940 | TUBGCP6      | 22 | 0.00705398 | 0.408000765 | 0.528279646 |
| cg04139827 | TUFT1;TUFT1  | 1  | 0.00918233 | 0.255011515 | 0.366519322 |

|            |             |    |            |             |             |
|------------|-------------|----|------------|-------------|-------------|
| cg05373339 | TUG1;MORC   | 22 | 0.02342458 | 0.18316313  | 0.295823731 |
| cg27279674 | TULP3;TULP3 | 12 | 0.03789927 | 0.56090363  | 0.696362319 |
| cg03467567 | TULP4;TULP4 | 6  | 0.00689334 | 0.549001284 | 0.757656128 |
| cg07705604 | TULP4;TULP4 | 6  | 0.0003098  | 0.44760659  | 0.616246222 |
| cg12601856 | TULP4;TULP4 | 6  | 2.64E-05   | 0.313147107 | 0.653548959 |
| cg18978680 | TULP4;TULP4 | 6  | 3.61E-05   | 0.249962701 | 0.577741281 |
| cg19987965 | TULP4;TULP4 | 6  | 6.59E-05   | 0.372227004 | 0.680160884 |
| cg13068216 | TULP4;TULP4 | 6  | 4.87E-06   | 0.277266315 | 0.584329434 |
| cg02060443 | TULP4;TULP4 | 6  | 0.00021379 | 0.51731782  | 0.778107773 |
| cg23816737 | TULP4;TULP4 | 6  | 0.02404749 | 0.213728533 | 0.400560253 |
| cg07165851 | TULP4;TULP4 | 6  | 0.00096673 | 0.155773792 | 0.281301039 |
| cg22986947 | TXNDC5;TXN  | 6  | 0.00144184 | 0.495432488 | 0.613659577 |
| cg23306063 | TYK2        | 19 | 0.00128966 | 0.290661144 | 0.428548527 |
| cg21480173 | TYK2        | 19 | 0.00613024 | 0.682897304 | 0.796562829 |
| cg02886132 | TYW1B;TYW:  | 7  | 0.00229934 | 0.279282884 | 0.425085714 |
| cg24509225 | UBAC2;UBAC  | 13 | 0.00163802 | 0.245012413 | 0.438499392 |
| cg14227418 | UBAP2       | 9  | 0.00147359 | 0.559851753 | 0.662084609 |
| cg20555462 | UBASH3B     | 11 | 0.03534581 | 0.479922904 | 0.615394285 |
| cg14711145 | UBE2B       | 5  | 0.0062269  | 0.528980418 | 0.64471193  |
| cg06193520 | UBE2I;UBE2I | 16 | 0.00691903 | 0.551619215 | 0.653170702 |
| cg06361835 | UBE2J2;UBE2 | 1  | 0.01603018 | 0.529964133 | 0.632897781 |
| cg10628201 | UBE2L3;UBE: | 22 | 0.00263182 | 0.207726176 | 0.423006804 |
| cg17318943 | UBE2O       | 17 | 0.01396845 | 0.779805225 | 0.907598581 |
| cg12547839 | UBE2O       | 17 | 0.01693796 | 0.155852931 | 0.275991723 |
| cg10125465 | UBE4B;UBE4  | 1  | 0.02187647 | 0.283152918 | 0.463005908 |
| cg02390515 | UBE4B;UBE4  | 1  | 0.00070508 | 0.486712677 | 0.640389592 |
| cg10421435 | UBLCP1      | 5  | 0.01920955 | 0.796509073 | 0.898902717 |
| cg04440724 | UBN1;UBN1   | 16 | 0.00156146 | 0.79240301  | 0.911590752 |
| cg13270236 | UBR2        | 6  | 0.00251761 | 0.363758696 | 0.47090788  |
| cg22840650 | UBTD1       | 10 | 0.01169295 | 0.134315977 | 0.337611006 |
| cg15232718 | UBTD1       | 10 | 0.01123417 | 0.335735818 | 0.470049677 |
| cg25514475 | UBTD2       | 5  | 0.01622806 | 0.099589964 | 0.201313138 |
| cg08499158 | UBTF;UBTF;L | 17 | 0.00415684 | 0.421541904 | 0.594192966 |
| cg10308265 | UBTF;UBTF;L | 17 | 0.00111242 | 0.293506772 | 0.455923975 |
| cg16740067 | UBTF;UBTF;L | 17 | 0.00035928 | 0.700618912 | 0.803409312 |
| cg10402321 | UBXN11;UBX  | 1  | 0.01318563 | 0.330603165 | 0.466288911 |
| cg21934504 | UBXN6;UBXN  | 19 | 0.01494373 | 0.363230848 | 0.513314195 |
| cg03191919 | UBXN7       | 3  | 0.00308431 | 0.150087671 | 0.27237241  |
| cg14440024 | UCKL1;MIR19 | 20 | 0.00925044 | 0.139265261 | 0.240232252 |
| cg01637548 | UCKL1;MIR64 | 20 | 0.00794886 | 0.184752693 | 0.291169621 |
| cg27243297 | UCMA        | 10 | 0.00313634 | 0.206880355 | 0.369742536 |
| cg06536868 | UCN         | 2  | 0.00512577 | 0.21357145  | 0.318485818 |
| cg15671083 | UCN3        | 10 | 0.03059028 | 0.422631601 | 0.544815282 |
| cg00621899 | UFSP1;UFSP1 | 7  | 0.0048768  | 0.28165747  | 0.42649165  |
| cg17028658 | UFSP2;UFSP2 | 4  | 0.01330349 | 0.509307936 | 0.696112472 |
| cg03631065 | UGGT2       | 13 | 0.00795627 | 0.636618989 | 0.738015134 |

|            |               |    |            |             |             |
|------------|---------------|----|------------|-------------|-------------|
| cg19931529 | UGP2;UGP2     | 2  | 0.01339898 | 0.144127297 | 0.27989403  |
| cg07823755 | UGT1A10;UC    | 2  | 0.02300184 | 0.614416795 | 0.72779267  |
| cg15260428 | ULK1          | 12 | 0.00438512 | 0.574790206 | 0.725290237 |
| cg17138298 | ULK1          | 12 | 0.00023739 | 0.210251067 | 0.31026204  |
| cg03240473 | UMODL1;UM     | 21 | 0.00264192 | 0.467231174 | 0.649670086 |
| cg14380013 | UNC119B       | 12 | 0.02754105 | 0.227524576 | 0.368347485 |
| cg23470227 | UNC13D        | 17 | 0.0003561  | 0.512707856 | 0.659117196 |
| cg12407791 | UNC13D        | 17 | 0.00601891 | 0.362955322 | 0.488289545 |
| cg16759416 | UNC5B         | 10 | 0.01276596 | 0.468391891 | 0.617059735 |
| cg25151834 | UNKL          | 16 | 0.00486443 | 0.733859864 | 0.868318479 |
| cg16490191 | UNKL          | 16 | 0.00637775 | 0.691026495 | 0.805857854 |
| cg01682111 | UNKL          | 16 | 0.00809909 | 0.095135873 | 0.203375929 |
| cg03622431 | UOX;DNASE2    | 1  | 0.0031469  | 0.395895413 | 0.538429622 |
| cg07151747 | UPP2;UPP2     | 2  | 0.00184143 | 0.340885164 | 0.496933383 |
| cg17710536 | URGCP;URGC    | 7  | 0.00657031 | 0.395752391 | 0.584521358 |
| cg19985030 | USH1G         | 17 | 0.00067845 | 0.466024252 | 0.646657899 |
| cg04431002 | USP10         | 16 | 0.00796463 | 0.346270318 | 0.530599051 |
| cg07795346 | USP10         | 16 | 0.00920818 | 0.11567889  | 0.288997285 |
| cg01019355 | USP12         | 13 | 0.00024258 | 0.236498597 | 0.404370937 |
| cg02387639 | USP13         | 3  | 0.00407088 | 0.354041163 | 0.559081714 |
| cg02756502 | USP20;USP20   | 9  | 0.01809313 | 0.205888793 | 0.347900322 |
| cg07213414 | USP31         | 16 | 0.03769143 | 0.406454103 | 0.562682237 |
| cg24427271 | USP36         | 17 | 0.00412935 | 0.433428551 | 0.64698083  |
| cg23496516 | USP36         | 17 | 0.00109578 | 0.35164982  | 0.511004891 |
| cg22849526 | USP42         | 7  | 0.02231813 | 0.650724868 | 0.781651303 |
| cg27657926 | USP42         | 7  | 0.03967642 | 0.387390625 | 0.510748804 |
| cg10161111 | USP42         | 7  | 0.00232071 | 0.204882512 | 0.317449151 |
| cg05638347 | USP42         | 7  | 0.00602384 | 0.764648318 | 0.872008653 |
| cg10003032 | USP42         | 7  | 0.00750991 | 0.159837567 | 0.267018553 |
| cg10752190 | USP43         | 17 | 0.00338219 | 0.328875956 | 0.477578875 |
| cg10098221 | USP46;USP46   | 4  | 0.01286545 | 0.161221518 | 0.315560063 |
| cg27181013 | USP5;USP5;C   | 12 | 0.01986989 | 0.292290814 | 0.425797774 |
| cg10853431 | USP6NL;USP6NL | 10 | 0.00030928 | 0.353154152 | 0.571993402 |
| cg18766900 | USP6NL;USP6NL | 10 | 0.00721444 | 0.351090526 | 0.54031875  |
| cg06528737 | USP6NL;USP6NL | 10 | 0.00587002 | 0.483973459 | 0.653645225 |
| cg06302998 | USP6NL;USP6NL | 10 | 0.0151102  | 0.144364993 | 0.304592016 |
| cg06918917 | USP6NL;USP6NL | 10 | 0.01696611 | 0.17647903  | 0.304561396 |
| cg08699489 | USP6NL;USP6NL | 10 | 0.01137672 | 0.468995562 | 0.580752988 |
| cg04444027 | USP7          | 16 | 0.01310841 | 0.184956537 | 0.341269907 |
| cg01601926 | USP7          | 16 | 0.00338585 | 0.270959326 | 0.397341481 |
| cg19109601 | UTP20         | 12 | 0.04484473 | 0.358896654 | 0.534444621 |
| cg18800739 | UTRN          | 6  | 0.02059713 | 0.249196172 | 0.380898168 |
| cg02475675 | UTRN          | 6  | 0.00474389 | 0.647559504 | 0.773944044 |
| cg20625138 | UTS2;UTS2     | 1  | 0.0036042  | 0.336497383 | 0.537493015 |
| cg07783183 | UVRAG         | 11 | 0.00039886 | 0.572906428 | 0.798818518 |
| cg24630516 | UVRAG         | 11 | 0.00068259 | 0.769672396 | 0.870215991 |

|            |             |    |            |             |             |
|------------|-------------|----|------------|-------------|-------------|
| cg14321837 | UXS1        | 2  | 0.0143378  | 0.497623641 | 0.624846699 |
| cg10216848 | VAC14       | 16 | 0.00030405 | 0.435896133 | 0.668876843 |
| cg08201451 | VAC14       | 16 | 0.00084015 | 0.408549587 | 0.596184091 |
| cg10262662 | VAC14       | 16 | 0.00059507 | 0.424380259 | 0.584447818 |
| cg05704955 | VAC14       | 16 | 0.00595575 | 0.160451568 | 0.272425374 |
| cg07671622 | VAC14       | 16 | 0.00399146 | 0.166400826 | 0.26988913  |
| cg15673491 | VAR2;VAR2;  | 6  | 0.00759233 | 0.431993957 | 0.566350445 |
| cg17428922 | VAR2;VAR2;  | 6  | 0.01544673 | 0.45156843  | 0.583002059 |
| cg02149965 | VAR2;VAR2;  | 6  | 0.0137696  | 0.296762366 | 0.422474416 |
| cg11505113 | VASH2;VASH  | 1  | 0.00097224 | 0.164271551 | 0.269401738 |
| cg26457890 | VASN;CORO7  | 16 | 0.0003638  | 0.147203336 | 0.352402883 |
| cg04185382 | VASN;CORO7  | 16 | 0.00127256 | 0.288815133 | 0.431856522 |
| cg01851968 | VASN;CORO7  | 16 | 0.00502589 | 0.402870135 | 0.53051891  |
| cg13954067 | VAV2;VAV2   | 9  | 0.00378013 | 0.108847084 | 0.304350724 |
| cg13829680 | VAV2;VAV2   | 9  | 0.00018852 | 0.593372345 | 0.762676616 |
| cg13424940 | VAV2;VAV2   | 9  | 0.00352415 | 0.197168632 | 0.349037078 |
| cg14286025 | VAV2;VAV2   | 9  | 0.00069104 | 0.243985389 | 0.394417725 |
| cg00788204 | VAV2;VAV2   | 9  | 0.00220544 | 0.639201346 | 0.779089905 |
| cg14308466 | VAV2;VAV2   | 9  | 0.01915561 | 0.185810885 | 0.310230456 |
| cg13836412 | VAV2;VAV2   | 9  | 0.00619877 | 0.460326977 | 0.575529202 |
| cg14137625 | VAV2;VAV2   | 9  | 0.01039444 | 0.378906929 | 0.481311443 |
| cg04223006 | VCAN;VCAN;  | 5  | 0.00684581 | 0.208764527 | 0.354556113 |
| cg16492597 | VDAC1       | 5  | 0.00191281 | 0.135895312 | 0.27757693  |
| cg25219939 | VDR;VDR     | 12 | 0.0003561  | 0.481750667 | 0.679148139 |
| cg12279019 | VEGFA;VEGF. | 6  | 0.00371795 | 0.308770707 | 0.500461982 |
| cg16907527 | VEGFA;VEGF. | 6  | 0.00367549 | 0.580235021 | 0.734103636 |
| cg25547939 | VEGFB;DNAJ1 | 11 | 0.0050449  | 0.336390227 | 0.474774665 |
| cg22658311 | VEGFC       | 4  | 0.0030301  | 0.399106922 | 0.555374852 |
| cg19875532 | VENTX       | 10 | 0.00952571 | 0.224892932 | 0.325823387 |
| cg01589054 | VGLL4       | 3  | 0.03587503 | 0.544472615 | 0.695817529 |
| cg15876825 | VGLL4;VGLL4 | 3  | 0.00066438 | 0.249245854 | 0.404291925 |
| cg01948850 | VGLL4;VGLL4 | 3  | 0.00240426 | 0.134507596 | 0.277438582 |
| cg17553677 | VGLL4;VGLL4 | 3  | 0.00710997 | 0.175295658 | 0.311988157 |
| cg26015019 | VGLL4;VGLL4 | 3  | 0.04302448 | 0.502317176 | 0.622415508 |
| cg03612519 | VGLL4;VGLL4 | 3  | 0.0499271  | 0.694355018 | 0.813479556 |
| cg22841079 | VGLL4;VGLL4 | 3  | 0.01099835 | 0.192889126 | 0.380895619 |
| cg08815359 | VGLL4;VGLL4 | 3  | 3.77E-05   | 0.637445601 | 0.812584389 |
| cg00510331 | VGLL4;VGLL4 | 3  | 0.00756887 | 0.441649769 | 0.604492825 |
| cg23193320 | VGLL4;VGLL4 | 3  | 0.00213549 | 0.46711565  | 0.611973625 |
| cg25334834 | VGLL4;VGLL4 | 3  | 0.00581964 | 0.634406432 | 0.764538984 |
| cg03182000 | VGLL4;VGLL4 | 3  | 0.00023272 | 0.601085935 | 0.729774758 |
| cg21527078 | VGLL4;VGLL4 | 3  | 0.0027503  | 0.159247268 | 0.292505167 |
| cg27083087 | VGLL4;VGLL4 | 3  | 0.00865096 | 0.151503606 | 0.267345941 |
| cg15736553 | VGLL4;VGLL4 | 3  | 0.00224433 | 0.153300038 | 0.257855227 |
| cg19880465 | VILL        | 3  | 0.00854462 | 0.177881181 | 0.376090391 |
| cg14974056 | VIT         | 2  | 0.01179869 | 0.558746408 | 0.683144222 |

|            |              |    |            |             |             |
|------------|--------------|----|------------|-------------|-------------|
| cg07459478 | VOPP1        | 7  | 0.00289269 | 0.204716638 | 0.347420216 |
| cg18576301 | VPS13B;VPS1  | 8  | 0.00032559 | 0.465297545 | 0.635483644 |
| cg17117823 | VPS13B;VPS1  | 8  | 0.01168316 | 0.524345337 | 0.688010274 |
| cg04175786 | VPS13B;VPS1  | 8  | 0.01230533 | 0.143833428 | 0.275769414 |
| cg18224970 | VPS13B;VPS1  | 8  | 0.01002356 | 0.423458709 | 0.552515339 |
| cg26228280 | VPS13D;VPS1  | 1  | 0.00741989 | 0.264044876 | 0.463868213 |
| cg07139350 | VPS13D;VPS1  | 1  | 0.04255645 | 0.127645952 | 0.294910401 |
| cg09740775 | VPS33B       | 15 | 0.00732284 | 0.516906964 | 0.640911688 |
| cg24692310 | VPS37C       | 11 | 0.00144184 | 0.363251721 | 0.487740415 |
| cg01115243 | VPS4A        | 16 | 0.00831518 | 0.271951801 | 0.422748037 |
| cg15105901 | VPS4A        | 16 | 0.00652368 | 0.693726179 | 0.801537219 |
| cg23510109 | VPS53;VPS53  | 17 | 0.00118042 | 0.384393208 | 0.607978859 |
| cg08414021 | VPS8;VPS8    | 3  | 0.00377565 | 0.793541778 | 0.915729911 |
| cg13570957 | VWA1;VWA1    | 1  | 0.02007512 | 0.575977363 | 0.696340188 |
| cg09668627 | VWA1;VWA1    | 1  | 0.00582777 | 0.200645039 | 0.307444066 |
| cg24363374 | VWA5B2       | 3  | 0.01087026 | 0.279063561 | 0.399733964 |
| cg06730678 | VWF          | 12 | 0.00188582 | 0.52961757  | 0.673063736 |
| cg20837463 | VWF          | 12 | 0.00120761 | 0.130014613 | 0.271538212 |
| cg15104126 | VWF          | 12 | 0.03166205 | 0.501494806 | 0.626342226 |
| cg16566595 | WBP11P1      | 18 | 0.04803716 | 0.205634218 | 0.323239105 |
| cg09537568 | WDFY3;WDF    | 4  | 0.01387187 | 0.44150921  | 0.589121244 |
| cg13623664 | WDFY4        | 10 | 0.02123142 | 0.12577712  | 0.245301007 |
| cg24789587 | WDR18        | 19 | 0.02483047 | 0.650007107 | 0.762512295 |
| cg01755336 | WDR20;WDF    | 14 | 0.00316094 | 0.302626613 | 0.458199974 |
| cg04545835 | WDR20;WDF    | 14 | 0.00427901 | 0.456119782 | 0.567368993 |
| cg09980114 | WDR20;WDF    | 14 | 0.00312894 | 0.67043396  | 0.776871301 |
| cg04858090 | WDR27        | 6  | 0.04076212 | 0.647719393 | 0.823006738 |
| cg07385723 | WDR27        | 6  | 0.00681997 | 0.190226073 | 0.326618989 |
| cg06630010 | WDR37        | 10 | 0.0171675  | 0.669338128 | 0.775347604 |
| cg12167135 | WDR45L       | 17 | 0.00293426 | 0.614076064 | 0.777710115 |
| cg13504933 | WDR51A;WC    | 3  | 0.01005748 | 0.454411804 | 0.600009684 |
| cg07822618 | WDR60        | 7  | 0.00047327 | 0.272210661 | 0.474715134 |
| cg01302119 | WDR60        | 7  | 0.00129139 | 0.42086259  | 0.534649325 |
| cg06728824 | WDR93        | 15 | 0.01473031 | 0.692642515 | 0.854208626 |
| cg08933790 | WFIKKN1      | 16 | 0.01741205 | 0.718867416 | 0.837763476 |
| cg20889395 | WFIKKN2      | 17 | 0.0083029  | 0.24850931  | 0.365138973 |
| cg27520716 | WHAMML2      | 15 | 0.01217074 | 0.689118428 | 0.790861064 |
| cg04996238 | WHSC2        | 4  | 0.01614421 | 0.252271138 | 0.412094634 |
| cg00248861 | WHSC2        | 4  | 0.0262525  | 0.406919605 | 0.545777523 |
| cg01425021 | WHSC2        | 4  | 0.00092474 | 0.631609462 | 0.756348008 |
| cg11164860 | WHSC2        | 4  | 0.0333247  | 0.266789911 | 0.379735577 |
| cg18690368 | WIPF3        | 7  | 0.01407613 | 0.215865177 | 0.383734236 |
| cg08605301 | WIPF3        | 7  | 0.00051031 | 0.166834836 | 0.283837955 |
| cg26988194 | WIPI1        | 17 | 0.00421428 | 0.52728827  | 0.666049979 |
| cg06640364 | WIPI2;WIPI2; | 7  | 0.00897135 | 0.532050119 | 0.637662951 |
| cg17667625 | WISP1;WISP:  | 8  | 0.04468293 | 0.119316653 | 0.252845432 |

|            |             |    |            |             |             |
|------------|-------------|----|------------|-------------|-------------|
| cg00122628 | WISP1;WISP: | 8  | 0.00817394 | 0.408283918 | 0.528509505 |
| cg26617637 | WISP1;WISP: | 8  | 0.00422162 | 0.276823737 | 0.393543718 |
| cg19804071 | WISP3;WISP: | 6  | 0.00185899 | 0.289459255 | 0.411057695 |
| cg14723977 | WIZ         | 19 | 0.00107935 | 0.305445761 | 0.496061512 |
| cg13481840 | WNK2        | 9  | 0.00148737 | 0.37603491  | 0.562807848 |
| cg02169981 | WNT11       | 11 | 0.00422422 | 0.501461031 | 0.662604779 |
| cg15574321 | WNT11       | 11 | 0.01064834 | 0.253587684 | 0.371378082 |
| cg02298472 | WNT5A       | 3  | 0.00911132 | 0.44420201  | 0.611892745 |
| cg01777121 | WNT5A       | 3  | 0.0223208  | 0.287726273 | 0.434050594 |
| cg18562578 | WNT5A       | 3  | 0.00811049 | 0.321160007 | 0.452019559 |
| cg24216596 | WNT5A       | 3  | 0.00557693 | 0.420851094 | 0.544229743 |
| cg10302498 | WNT5B;WNT   | 12 | 0.02886667 | 0.35875202  | 0.461955426 |
| cg25195899 | WSB1;WSB1   | 17 | 0.00305772 | 0.698949582 | 0.803664217 |
| cg00923481 | WSCD2       | 12 | 0.0017138  | 0.382511099 | 0.520955571 |
| cg22264616 | WT1;WT1;W   | 11 | 0.0274865  | 0.239767196 | 0.34735145  |
| cg18472912 | WWC1;WWC    | 5  | 0.00229373 | 0.476643893 | 0.644741184 |
| cg21038780 | WWC1;WWC    | 5  | 0.03037921 | 0.200923281 | 0.368109151 |
| cg26990527 | WWOX        | 16 | 0.00174028 | 0.611805296 | 0.776465156 |
| cg03119442 | WWOX        | 16 | 0.00222827 | 0.709739759 | 0.854599025 |
| cg03904534 | WWOX        | 16 | 0.00313777 | 0.740877559 | 0.855725908 |
| cg02559817 | WWOX        | 16 | 0.0462144  | 0.711149954 | 0.818027922 |
| cg01656717 | WWP2;WWF    | 16 | 0.00536273 | 0.181671368 | 0.379313824 |
| cg02712546 | WWP2;WWF    | 16 | 0.0111003  | 0.168287521 | 0.352535671 |
| cg05781582 | WWP2;WWF    | 16 | 0.00741599 | 0.118066067 | 0.301059084 |
| cg00657810 | WWP2;WWF    | 16 | 0.01068023 | 0.146470199 | 0.32609492  |
| cg01171429 | WWP2;WWF    | 16 | 0.00755574 | 0.3999261   | 0.575163267 |
| cg08701134 | WWP2;WWF    | 16 | 0.00145662 | 0.214349971 | 0.386846117 |
| cg09036558 | WWP2;WWF    | 16 | 0.00192081 | 0.260078095 | 0.43163239  |
| cg26884345 | WWP2;WWF    | 16 | 0.00220203 | 0.11858467  | 0.25801768  |
| cg00963786 | WWP2;WWF    | 16 | 0.00976341 | 0.140630184 | 0.26140704  |
| cg03346415 | WWP2;WWF    | 16 | 0.00589194 | 0.176851477 | 0.287469535 |
| cg08419373 | WWP2;WWF    | 16 | 0.01167914 | 0.227179213 | 0.33634088  |
| cg27449255 | WWP2;WWF    | 16 | 0.0048291  | 0.127467781 | 0.235560851 |
| cg06509362 | WWP2;WWF    | 16 | 0.01240399 | 0.417474146 | 0.519337883 |
| cg15043384 | WWTR1;WW    | 3  | 0.00142373 | 0.180922048 | 0.313550585 |
| cg14557185 | WWTR1;WW    | 3  | 0.00922787 | 0.095774817 | 0.208923652 |
| cg10291238 | XPO4        | 13 | 0.03848302 | 0.742735669 | 0.857994061 |
| cg02412345 | XPO7;XPO7   | 8  | 0.01542532 | 0.30604177  | 0.436025011 |
| cg22272713 | XPO7;XPO7   | 8  | 0.00362241 | 0.131896622 | 0.255746921 |
| cg22872857 | XPO7;XPO7   | 8  | 0.02967034 | 0.125104837 | 0.248103852 |
| cg04031030 | XPO7;XPO7;) | 8  | 0.02510102 | 0.652814022 | 0.785112194 |
| cg14514120 | XPOT        | 12 | 3.75E-05   | 0.329744528 | 0.538459078 |
| cg07916058 | XPR1;XPR1   | 1  | 0.01888074 | 0.720608123 | 0.866490493 |
| cg20864326 | XRCC2       | 7  | 0.03856066 | 0.74697287  | 0.862572742 |
| cg02259047 | XRCC3;XRCC: | 14 | 0.00086154 | 0.328670333 | 0.525848207 |
| cg10347949 | XRCC3;XRCC: | 14 | 0.00032743 | 0.495137476 | 0.688049305 |

|            |             |    |            |             |             |
|------------|-------------|----|------------|-------------|-------------|
| cg09922085 | XRCC3;XRCC3 | 14 | 0.0003561  | 0.59033415  | 0.709623003 |
| cg27170268 | XRCC3;XRCC3 | 14 | 0.00833443 | 0.454191674 | 0.569438802 |
| cg25561904 | XRCC3;XRCC3 | 14 | 0.00019392 | 0.399066061 | 0.570430872 |
| cg02256455 | XRCC3;XRCC3 | 14 | 0.0006377  | 0.401099993 | 0.510233363 |
| cg13255208 | XRCC3;XRCC3 | 14 | 0.00074584 | 0.528087035 | 0.634300823 |
| cg05998850 | XRCC5       | 2  | 0.00915775 | 0.66332246  | 0.770014016 |
| cg06635133 | XYLT1       | 16 | 0.00039187 | 0.175726852 | 0.430416457 |
| cg04986899 | XYLT1       | 16 | 0.00212362 | 0.434702815 | 0.675179224 |
| cg16546017 | XYLT1       | 16 | 0.00418379 | 0.211828055 | 0.384147408 |
| cg07896448 | XYLT1       | 16 | 0.02151232 | 0.192530725 | 0.346745809 |
| cg06066697 | XYLT1       | 16 | 0.00622698 | 0.188965981 | 0.34136797  |
| cg26706077 | XYLT1       | 16 | 0.03266095 | 0.520980796 | 0.629690835 |
| cg13917578 | YIPF5;YIPF5 | 5  | 0.02088907 | 0.259327611 | 0.377652887 |
| cg16640973 | YJEFN3      | 19 | 0.00377432 | 0.204064124 | 0.384600735 |
| cg15839431 | YJEFN3      | 19 | 0.00228907 | 0.2721555   | 0.407547054 |
| cg10172584 | YJEFN3      | 19 | 0.01501739 | 0.306803224 | 0.413728417 |
| cg27445557 | YKT6        | 7  | 0.00117917 | 0.587899456 | 0.705974574 |
| cg01653532 | YPEL2       | 17 | 0.0393529  | 0.105077505 | 0.272948877 |
| cg10948088 | YPEL2       | 17 | 0.01828197 | 0.59937912  | 0.716129042 |
| cg13521620 | YPEL2       | 17 | 0.03406382 | 0.127381149 | 0.238652573 |
| cg26003360 | YPEL2       | 17 | 0.00147451 | 0.69249813  | 0.798302702 |
| cg21364719 | ZADH2       | 18 | 0.03809973 | 0.547290155 | 0.681432774 |
| cg17953764 | ZAR1        | 4  | 0.00523957 | 0.119226847 | 0.221627823 |
| cg24214000 | ZBED4       | 22 | 0.00458025 | 0.308784062 | 0.41241106  |
| cg11049439 | ZBTB12      | 6  | 0.00180584 | 0.201411792 | 0.433986323 |
| cg11349594 | ZBTB12      | 6  | 0.00067845 | 0.349913216 | 0.547945244 |
| cg24826636 | ZBTB12      | 6  | 0.01288521 | 0.197581388 | 0.313309866 |
| cg12026858 | ZBTB16;ZBTE | 11 | 0.0014307  | 0.361992533 | 0.604257083 |
| cg22768358 | ZBTB16;ZBTE | 11 | 0.00929712 | 0.273485527 | 0.435164763 |
| cg03725573 | ZBTB16;ZBTE | 11 | 0.00092663 | 0.205662923 | 0.344488137 |
| cg07631435 | ZBTB16;ZBTE | 11 | 0.04762086 | 0.164343921 | 0.285275883 |
| cg14373380 | ZBTB17      | 1  | 0.01812609 | 0.362809918 | 0.496240751 |
| cg19981243 | ZBTB20;ZBTE | 3  | 0.01823019 | 0.285454888 | 0.465156291 |
| cg07165288 | ZBTB20;ZBTE | 3  | 0.01500836 | 0.150368964 | 0.332630182 |
| cg10995873 | ZBTB20;ZBTE | 3  | 0.00288935 | 0.456282745 | 0.622862501 |
| cg26100303 | ZBTB20;ZBTE | 3  | 0.00146089 | 0.545587563 | 0.689022767 |
| cg27168291 | ZBTB22;TAPE | 6  | 0.00029279 | 0.250821809 | 0.400895845 |
| cg27486151 | ZBTB4;ZBTB4 | 17 | 0.00345483 | 0.520680753 | 0.621522472 |
| cg26681523 | ZBTB40;ZBTE | 1  | 0.04358736 | 0.316209958 | 0.464501118 |
| cg14918743 | ZBTB42      | 14 | 5.47E-05   | 0.313670747 | 0.528740053 |
| cg01620248 | ZBTB42      | 14 | 0.00026765 | 0.566942765 | 0.724906081 |
| cg09255505 | ZBTB42      | 14 | 0.00228183 | 0.503736125 | 0.656001874 |
| cg00975418 | ZBTB43;ZBTE | 9  | 0.02770256 | 0.754327437 | 0.862108747 |
| cg22735105 | ZBTB46      | 20 | 0.00089244 | 0.332855459 | 0.532889545 |
| cg12840850 | ZBTB46      | 20 | 0.00618205 | 0.382039768 | 0.502782858 |
| cg18369516 | ZBTB46      | 20 | 0.01113697 | 0.118523593 | 0.226085282 |



|            |              |    |            |             |             |
|------------|--------------|----|------------|-------------|-------------|
| cg04634182 | ZBTB47       | 3  | 0.00338219 | 0.561858403 | 0.723120495 |
| cg25049162 | ZBTB47       | 3  | 0.0005198  | 0.314022757 | 0.421166927 |
| cg21250061 | ZBTB5        | 9  | 0.01618329 | 0.177392196 | 0.328717721 |
| cg09598590 | ZC3H13       | 13 | 0.01402764 | 0.571459808 | 0.767000679 |
| cg20891306 | ZC3H13       | 13 | 0.03769143 | 0.805141852 | 0.928318024 |
| cg08195758 | ZC3H18       | 16 | 0.00789674 | 0.363078321 | 0.46945549  |
| cg04377850 | ZC3H18       | 16 | 0.04976426 | 0.500471168 | 0.605600669 |
| cg08380064 | ZC3H3        | 8  | 4.31E-05   | 0.464307927 | 0.700618248 |
| cg12688965 | ZC3H3        | 8  | 0.00202083 | 0.347797396 | 0.533953801 |
| cg24974704 | ZC3H3        | 8  | 0.00243017 | 0.266830503 | 0.448006767 |
| cg13191508 | ZC3H3        | 8  | 0.0007702  | 0.250779103 | 0.431212227 |
| cg17517442 | ZC3H3        | 8  | 0.0048916  | 0.493637341 | 0.667341057 |
| cg04040861 | ZC3H3        | 8  | 0.00023093 | 0.233459786 | 0.406028202 |
| cg15170442 | ZC3H3        | 8  | 0.00122587 | 0.364247415 | 0.515347109 |
| cg15681229 | ZC3H3        | 8  | 0.00018382 | 0.451462735 | 0.586774757 |
| cg11303301 | ZC3H3        | 8  | 0.00338013 | 0.249822053 | 0.382012563 |
| cg11497758 | ZC3H3        | 8  | 0.04009269 | 0.555177169 | 0.661515653 |
| cg11329090 | ZC3H3        | 8  | 0.00817655 | 0.667451588 | 0.771769676 |
| cg14189808 | ZC3H4        | 19 | 0.02253596 | 0.150130159 | 0.29505882  |
| cg09095525 | ZC3H7A       | 16 | 0.02507971 | 0.145006703 | 0.280373994 |
| cg08160706 | ZC3H7A       | 16 | 0.04183189 | 0.636996839 | 0.766893985 |
| cg09509089 | ZCCHC10      | 5  | 0.00028378 | 0.779750411 | 0.895947058 |
| cg27414087 | ZCCHC14      | 16 | 0.00625218 | 0.241525638 | 0.430281103 |
| cg04772241 | ZCCHC14      | 16 | 0.02317214 | 0.199812694 | 0.320942178 |
| cg02896970 | ZCCHC14      | 16 | 0.0052175  | 0.46083991  | 0.578203851 |
| cg07894883 | ZCCHC24      | 10 | 0.00130631 | 0.445373221 | 0.626052573 |
| cg04904468 | ZCCHC24      | 10 | 0.01019896 | 0.540790692 | 0.676021071 |
| cg04920385 | ZCCHC24      | 10 | 0.02107109 | 0.115670944 | 0.248565614 |
| cg17310882 | ZDHHC14;ZD   | 6  | 0.00221798 | 0.220604513 | 0.387690191 |
| cg23935522 | ZDHHC17      | 12 | 0.02326198 | 0.591769174 | 0.705715425 |
| cg04116155 | ZEB1;ZEB1;Zl | 10 | 0.0028302  | 0.664780667 | 0.797765207 |
| cg26229092 | ZEB1;ZEB1;Zl | 10 | 0.00992851 | 0.743690482 | 0.863945895 |
| cg17552088 | ZFAND3       | 6  | 0.00850779 | 0.207132464 | 0.439391976 |
| cg08858926 | ZFHX3;ZFHX3  | 16 | 0.00455801 | 0.523328258 | 0.68421833  |
| cg07395439 | ZFHX3;ZFHX3  | 16 | 0.00091139 | 0.624454907 | 0.735010391 |
| cg06126698 | ZFPM1        | 16 | 0.00281198 | 0.387023673 | 0.605175422 |
| cg05142677 | ZFPM1        | 16 | 0.00490262 | 0.172959689 | 0.303090375 |
| cg00652332 | ZFPM1        | 16 | 0.00325165 | 0.559024293 | 0.673724953 |
| cg10450897 | ZFPM2        | 8  | 0.04055315 | 0.663674867 | 0.769762412 |
| cg18376227 | ZFYVE16;ZFY  | 5  | 0.01913464 | 0.786900848 | 0.908232218 |
| cg04117455 | ZFYVE21      | 14 | 0.00036876 | 0.224220308 | 0.499254153 |
| cg06946814 | ZFYVE21      | 14 | 0.0007702  | 0.556344579 | 0.762667193 |
| cg10126234 | ZFYVE21      | 14 | 0.0074034  | 0.345620463 | 0.504081278 |
| cg21167502 | ZFYVE21      | 14 | 0.03779743 | 0.507628522 | 0.665208777 |
| cg13154413 | ZFYVE21      | 14 | 0.00565444 | 0.448931428 | 0.602272416 |
| cg25580656 | ZFYVE21      | 14 | 0.00306344 | 0.514949742 | 0.661004356 |

|            |             |    |            |             |             |
|------------|-------------|----|------------|-------------|-------------|
| cg04984818 | ZFYVE21     | 14 | 0.01005148 | 0.642554589 | 0.773837223 |
| cg09924366 | ZFYVE21     | 14 | 8.50E-05   | 0.243528246 | 0.36770281  |
| cg04162497 | ZFYVE21     | 14 | 0.02180569 | 0.296533447 | 0.412210065 |
| cg08489478 | ZFYVE27;ZFY | 10 | 0.01679837 | 0.526196561 | 0.699038805 |
| cg23859313 | ZFYVE28     | 4  | 0.00116998 | 0.436101054 | 0.59386203  |
| cg00856997 | ZFYVE28     | 4  | 0.00718213 | 0.415084832 | 0.516678942 |
| cg07042007 | ZFYVE28     | 4  | 0.00545547 | 0.208223608 | 0.308910844 |
| cg19894253 | ZHX1;ZHX1   | 8  | 0.03678629 | 0.465351972 | 0.606750746 |
| cg06035200 | ZHX2        | 8  | 0.00237468 | 0.132942172 | 0.341625864 |
| cg21926603 | ZHX2        | 8  | 0.00850779 | 0.17899448  | 0.340914666 |
| cg02795981 | ZMIZ1       | 10 | 0.00172011 | 0.281886283 | 0.5129556   |
| cg20679052 | ZMIZ1       | 10 | 0.00022274 | 0.390580405 | 0.61496777  |
| cg19666787 | ZMIZ1       | 10 | 0.00404998 | 0.149164786 | 0.336447423 |
| cg04256907 | ZMIZ1       | 10 | 0.00474734 | 0.451825525 | 0.631344072 |
| cg15733068 | ZMIZ1       | 10 | 0.00069916 | 0.415595934 | 0.589203025 |
| cg14825905 | ZMIZ1       | 10 | 0.00305286 | 0.249555892 | 0.415702858 |
| cg02743070 | ZMIZ1       | 10 | 3.77E-05   | 0.356941147 | 0.512394446 |
| cg24752964 | ZMIZ1       | 10 | 0.01503878 | 0.146823577 | 0.300852776 |
| cg25365214 | ZMIZ1       | 10 | 0.00014385 | 0.466041696 | 0.616590954 |
| cg16112766 | ZMIZ1       | 10 | 0.01121859 | 0.121289386 | 0.266847655 |
| cg16815157 | ZMIZ1       | 10 | 0.00016606 | 0.495389139 | 0.635693289 |
| cg10812439 | ZMIZ1       | 10 | 0.03008269 | 0.48346812  | 0.614197857 |
| cg13676902 | ZMIZ1       | 10 | 0.00873052 | 0.650439127 | 0.772057102 |
| cg09354331 | ZMIZ1       | 10 | 0.00047652 | 0.474915842 | 0.595671058 |
| cg15522953 | ZMIZ1       | 10 | 0.02188742 | 0.61100154  | 0.726242697 |
| cg17823346 | ZMIZ1       | 10 | 0.00954606 | 0.106814495 | 0.218301416 |
| cg02851873 | ZMIZ1       | 10 | 0.02699588 | 0.358420079 | 0.467834606 |
| cg20744163 | ZMIZ1       | 10 | 0.00646906 | 0.722087486 | 0.828874297 |
| cg14841514 | ZMIZ1       | 10 | 0.00127864 | 0.424600531 | 0.530824706 |
| cg16201273 | ZMIZ1       | 10 | 3.02E-06   | 0.687303119 | 0.793139623 |
| cg17065712 | ZMIZ1       | 10 | 0.00966663 | 0.469280433 | 0.574068941 |
| cg10816687 | ZMIZ1       | 10 | 0.00138002 | 0.708828999 | 0.812039092 |
| cg01053681 | ZMIZ1       | 10 | 0.00110317 | 0.702631614 | 0.80513828  |
| cg03707696 | ZMIZ1       | 10 | 0.00499946 | 0.687567709 | 0.79001245  |
| cg05141341 | ZMIZ2;ZMIZ2 | 7  | 0.00055779 | 0.224222193 | 0.431163116 |
| cg19523667 | ZMIZ2;ZMIZ2 | 7  | 0.00618119 | 0.190693718 | 0.315249545 |
| cg23350904 | ZMYND15;ZM  | 17 | 0.00723512 | 0.132720779 | 0.233137541 |
| cg24343287 | ZNF135;ZNF1 | 19 | 0.01168336 | 0.624703216 | 0.752081794 |
| cg15264273 | ZNF169      | 9  | 0.00456592 | 0.709736147 | 0.829688029 |
| cg02013987 | ZNF222;ZNF2 | 19 | 0.02088415 | 0.430125246 | 0.546084476 |
| cg14781805 | ZNF236      | 18 | 0.0302548  | 0.644894881 | 0.793138726 |
| cg00077457 | ZNF326;LOC4 | 1  | 0.03624845 | 0.726097894 | 0.855012715 |
| cg10061906 | ZNF34       | 8  | 0.00199071 | 0.147089689 | 0.264234966 |
| cg20435267 | ZNF354B     | 5  | 0.00917927 | 0.546956935 | 0.655273015 |
| cg17422088 | ZNF362      | 1  | 0.02531777 | 0.602057936 | 0.739493794 |
| cg14700504 | ZNF365;ZNF3 | 10 | 0.04371082 | 0.457652062 | 0.582097195 |

|            |                 |    |            |             |             |
|------------|-----------------|----|------------|-------------|-------------|
| cg02712553 | ZNF365;ZNF366   | 10 | 0.00090911 | 0.664736392 | 0.787557194 |
| cg12508655 | ZNF366          | 5  | 0.01635226 | 0.499227922 | 0.637324098 |
| cg15872458 | ZNF385A;ZNF385B | 12 | 0.02651006 | 0.522508949 | 0.657116354 |
| cg17970299 | ZNF385A;ZNF385B | 12 | 0.00281006 | 0.188848772 | 0.368508451 |
| cg23765332 | ZNF385A;ZNF385B | 12 | 0.02906788 | 0.092042141 | 0.208359765 |
| cg19507160 | ZNF395          | 8  | 0.00422896 | 0.17458211  | 0.39768211  |
| cg18508845 | ZNF397OS;ZNF397 | 18 | 0.00126718 | 0.604886254 | 0.737616566 |
| cg15560061 | ZNF414;ZNF414-1 | 19 | 0.00147517 | 0.244644353 | 0.374941937 |
| cg10768564 | ZNF414;ZNF414-1 | 19 | 0.00162288 | 0.696724527 | 0.801166674 |
| cg02335656 | ZNF423          | 16 | 0.00205368 | 0.393376474 | 0.58724296  |
| cg10120897 | ZNF469          | 16 | 0.00177826 | 0.369432857 | 0.545348971 |
| cg26700277 | ZNF469          | 16 | 0.00043254 | 0.331890146 | 0.485805842 |
| cg16284674 | ZNF511;TUBB1    | 10 | 8.49E-05   | 0.345672647 | 0.604778815 |
| cg09523339 | ZNF512B         | 20 | 0.02866071 | 0.56298248  | 0.687113125 |
| cg15347788 | ZNF516          | 18 | 0.00478643 | 0.147343855 | 0.279060736 |
| cg17675150 | ZNF532          | 18 | 0.03984929 | 0.405257517 | 0.571590595 |
| cg25401010 | ZNF532          | 18 | 0.04071583 | 0.48575205  | 0.624734619 |
| cg22832557 | ZNF578          | 19 | 0.00257502 | 0.162082955 | 0.289346669 |
| cg26804891 | ZNF598          | 16 | 0.00262792 | 0.321789934 | 0.509512583 |
| cg05957504 | ZNF608          | 5  | 0.00567228 | 0.322560993 | 0.549539535 |
| cg22589697 | ZNF608          | 5  | 0.02852622 | 0.417582248 | 0.524847817 |
| cg23598573 | ZNF609          | 15 | 0.01237513 | 0.527623303 | 0.677453349 |
| cg11964338 | ZNF610;ZNF610-1 | 19 | 0.01452    | 0.379243938 | 0.564081575 |
| cg21047429 | ZNF628          | 19 | 0.01574867 | 0.550809792 | 0.655421944 |
| cg22449337 | ZNF642          | 1  | 0.03814669 | 0.170701096 | 0.292389124 |
| cg13798986 | ZNF653          | 19 | 0.02725798 | 0.535811214 | 0.655434889 |
| cg08418138 | ZNF670          | 1  | 0.03644915 | 0.71341176  | 0.815144924 |
| cg20156999 | ZNF692;ZNF692-1 | 1  | 0.0014578  | 0.545718716 | 0.65300447  |
| cg24680162 | ZNF697          | 1  | 0.02538582 | 0.481123902 | 0.623337715 |
| cg05342816 | ZNF707;ZNF707-1 | 8  | 0.00919576 | 0.588821181 | 0.82843032  |
| cg23005885 | ZNF710          | 15 | 0.02666729 | 0.237955624 | 0.341791964 |
| cg14110920 | ZNF740          | 12 | 0.03564622 | 0.175040372 | 0.285177798 |
| cg07999732 | ZNF775          | 7  | 0.00226672 | 0.551315191 | 0.671016068 |
| cg21326642 | ZNF777          | 7  | 0.04652171 | 0.762249004 | 0.865023637 |
| cg08287162 | ZNF821;ATXN1    | 16 | 0.04249022 | 0.560804545 | 0.668431394 |
| cg09427605 | ZNF827          | 4  | 0.00172356 | 0.198907675 | 0.452617412 |
| cg22598458 | ZNF92;ZNF92-1   | 7  | 0.00910712 | 0.198397895 | 0.323310462 |
| cg12968041 | ZNRF3           | 22 | 0.03448828 | 0.352884092 | 0.499502087 |
| cg05325182 | ZSWIM4          | 19 | 0.00351826 | 0.272539851 | 0.38207785  |
| cg16661004 | ZYG11A          | 1  | 0.03681634 | 0.598929855 | 0.714810989 |
| cg02574861 | ZZEF1           | 17 | 0.000644   | 0.70539788  | 0.819769587 |
| cg18943946 | ZZEF1           | 17 | 0.00904484 | 0.355946322 | 0.465072622 |
| cg22221847 | ZZZ3            | 1  | 0.02506738 | 0.734183564 | 0.845351149 |
| cg04589649 |                 | 2  | 0.00023192 | 0.283114339 | 0.604109157 |
| cg23678364 |                 | 4  | 0.00028063 | 0.248104136 | 0.564375248 |
| cg02571436 |                 | 10 | 0.00114336 | 0.196048843 | 0.502632406 |

|            |    |            |             |             |
|------------|----|------------|-------------|-------------|
| cg17393083 | 3  | 0.00084786 | 0.17502594  | 0.476505972 |
| cg09936919 | 2  | 0.00060157 | 0.181513253 | 0.481953271 |
| cg06228407 | 2  | 7.84E-05   | 0.354738894 | 0.654197143 |
| cg01234251 | 11 | 0.00184237 | 0.213781761 | 0.511991176 |
| cg23409007 | 6  | 0.00052651 | 0.4200017   | 0.714670121 |
| cg17017878 | 6  | 0.00016426 | 0.20545696  | 0.4918499   |
| cg26601431 | 1  | 0.00066183 | 0.244520571 | 0.52802818  |
| cg24985060 | 15 | 0.00316954 | 0.150874918 | 0.433498526 |
| cg10548805 | 14 | 0.00034195 | 0.277817062 | 0.558942788 |
| cg16362189 | 11 | 0.00035308 | 0.298181595 | 0.57867395  |
| cg17225604 | 17 | 0.03929765 | 0.570260217 | 0.848987446 |
| cg23114476 | 5  | 0.0002596  | 0.260437406 | 0.535096461 |
| cg10143823 | 14 | 0.00090161 | 0.303883143 | 0.574964744 |
| cg24006770 | 1  | 0.00023192 | 0.382194676 | 0.651958749 |
| cg25116792 | 3  | 0.0004591  | 0.503640192 | 0.764980401 |
| cg12748499 | 1  | 0.00030197 | 0.55518096  | 0.814885105 |
| cg25464265 | 1  | 0.00245178 | 0.34960759  | 0.608644867 |
| cg23429664 | 10 | 0.00066546 | 0.378254275 | 0.636914259 |
| cg02389264 | 16 | 0.00734925 | 0.369426164 | 0.628021729 |
| cg04492459 | 17 | 0.00014418 | 0.268763819 | 0.52348599  |
| cg18054281 | 10 | 0.00067128 | 0.175241006 | 0.429036874 |
| cg09767588 | 1  | 0.0022187  | 0.331020257 | 0.58396191  |
| cg14101442 | 11 | 0.00042688 | 0.27874574  | 0.530271489 |
| cg08357895 | 5  | 0.00514604 | 0.19801971  | 0.449535159 |
| cg04165337 | 8  | 0.0294297  | 0.439404794 | 0.690756543 |
| cg11746048 | 11 | 0.00084375 | 0.327446568 | 0.578602474 |
| cg06803420 | 5  | 0.00054116 | 0.225842751 | 0.476573854 |
| cg20462493 | 5  | 0.00117667 | 0.309641119 | 0.55974322  |
| cg14041701 | 11 | 0.00043325 | 0.259105374 | 0.508848597 |
| cg15924102 | 1  | 0.00223463 | 0.329324932 | 0.578354941 |
| cg26241893 | 5  | 0.00010542 | 0.373593502 | 0.621667897 |
| cg20365566 | 13 | 0.03610059 | 0.341868954 | 0.589900683 |
| cg06646139 | 4  | 0.00138064 | 0.157104579 | 0.404730968 |
| cg01898377 | 20 | 0.00010668 | 0.308203945 | 0.555377178 |
| cg23027179 | 5  | 0.00013692 | 0.223812312 | 0.469833294 |
| cg21059878 | 4  | 0.00036524 | 0.419287803 | 0.663657442 |
| cg21121082 | 11 | 0.00047914 | 0.176519211 | 0.420233821 |
| cg14099845 | 19 | 0.00024559 | 0.308610822 | 0.551451906 |
| cg22615203 | 13 | 0.0018158  | 0.320823495 | 0.559902694 |
| cg07584582 | 22 | 0.00048329 | 0.286430842 | 0.525382408 |
| cg17209471 | 22 | 0.00229627 | 0.311584107 | 0.550069747 |
| cg19907293 | 2  | 0.00078871 | 0.396033556 | 0.633655063 |
| cg15699099 | 2  | 0.00022303 | 0.296376163 | 0.533431358 |
| cg23253674 | 6  | 0.00028216 | 0.376438743 | 0.613492045 |
| cg14310533 | 12 | 0.00708426 | 0.419213879 | 0.655774939 |
| cg08372212 | 10 | 0.00107005 | 0.294148778 | 0.530158783 |

|            |    |            |             |             |
|------------|----|------------|-------------|-------------|
| cg13063274 | 3  | 0.00440581 | 0.237356297 | 0.472725342 |
| cg06139749 | 7  | 0.00056571 | 0.20350912  | 0.438219007 |
| cg12315995 | 15 | 0.00133236 | 0.14554141  | 0.379818701 |
| cg13520053 | 9  | 0.0136962  | 0.239925602 | 0.472889825 |
| cg12741572 | 18 | 0.00078986 | 0.311054582 | 0.543843751 |
| cg14123436 | 9  | 0.00128421 | 0.268845864 | 0.501261559 |
| cg07621853 | 2  | 1.50E-05   | 0.567767007 | 0.799912779 |
| cg15257489 | 8  | 0.00116681 | 0.217116805 | 0.449223729 |
| cg24990255 | 2  | 0.00128506 | 0.274119262 | 0.506167113 |
| cg23864514 | 7  | 0.00710091 | 0.376379964 | 0.607813794 |
| cg09578620 | 2  | 0.00326092 | 0.20410037  | 0.435273662 |
| cg02332936 | 9  | 0.00795469 | 0.265989336 | 0.496730738 |
| cg16213787 | 2  | 0.00584883 | 0.165153001 | 0.395572719 |
| cg22699768 | 1  | 0.01222898 | 0.326796032 | 0.555854205 |
| cg06653292 | 2  | 0.00020704 | 0.507441743 | 0.735725158 |
| cg06213047 | 16 | 0.00556178 | 0.274988243 | 0.5027011   |
| cg08818377 | 7  | 0.00043518 | 0.326630884 | 0.554328415 |
| cg13055709 | 1  | 0.00032522 | 0.182603423 | 0.408843467 |
| cg23340777 | 12 | 0.00967131 | 0.271543907 | 0.497774466 |
| cg10421739 | 6  | 0.00043878 | 0.365881206 | 0.592069826 |
| cg27584255 | 1  | 0.00873646 | 0.201703237 | 0.427676757 |
| cg22840887 | 10 | 0.0022873  | 0.151495252 | 0.376532475 |
| cg10541663 | 3  | 0.00430541 | 0.262004177 | 0.4868363   |
| cg01128025 | 4  | 0.00031984 | 0.325441229 | 0.54999802  |
| cg02274236 | 7  | 0.00441677 | 0.196278941 | 0.420667751 |
| cg10251446 | 3  | 0.00130505 | 0.364308156 | 0.588239292 |
| cg25402281 | 7  | 0.01818658 | 0.414661728 | 0.638568619 |
| cg19504528 | 10 | 0.00049693 | 0.538842075 | 0.761621184 |
| cg19990373 | 2  | 5.39E-05   | 0.234370543 | 0.457084463 |
| cg13796936 | 1  | 0.00163744 | 0.20473248  | 0.427319353 |
| cg01413548 | 6  | 0.00036469 | 0.311150619 | 0.53331638  |
| cg19067025 | 15 | 0.00940324 | 0.387381355 | 0.609511801 |
| cg11929693 | 5  | 0.00115876 | 0.50985158  | 0.731932124 |
| cg19425295 | 11 | 0.00082972 | 0.389484166 | 0.611315788 |
| cg24741744 | 18 | 0.00258976 | 0.259705688 | 0.480448363 |
| cg27551395 | 1  | 0.00053308 | 0.468166899 | 0.688047573 |
| cg03155825 | 7  | 0.00303663 | 0.26231096  | 0.482141548 |
| cg01275133 | 16 | 0.00575112 | 0.196779485 | 0.416164578 |
| cg09867546 | 6  | 0.00124607 | 0.236707606 | 0.456007343 |
| cg11698445 | 5  | 0.00264937 | 0.158366861 | 0.377549913 |
| cg22991039 | 21 | 0.00088647 | 0.348082124 | 0.567125302 |
| cg11119301 | 12 | 0.00606257 | 0.139403018 | 0.358324254 |
| cg16426034 | 11 | 0.00841867 | 0.246867342 | 0.465404983 |
| cg18239481 | 10 | 0.00124622 | 0.244161583 | 0.462696941 |
| cg00862307 | 18 | 0.01741944 | 0.428709581 | 0.646998952 |
| cg25024515 | 12 | 0.00952611 | 0.254504054 | 0.472605243 |

|            |    |            |             |             |
|------------|----|------------|-------------|-------------|
| cg25306875 | 2  | 0.00020144 | 0.272000422 | 0.489951208 |
| cg03025413 | 8  | 0.00842728 | 0.464796235 | 0.682685833 |
| cg10187894 | 10 | 0.00232152 | 0.354325997 | 0.572124941 |
| cg09437523 | 16 | 0.00037006 | 0.452576557 | 0.670329571 |
| cg02067239 | 16 | 0.00439235 | 0.246456208 | 0.464177913 |
| cg17485988 | 7  | 0.00042784 | 0.290186945 | 0.507731558 |
| cg15824962 | 1  | 0.02209131 | 0.197418978 | 0.414539615 |
| cg08866876 | 8  | 0.00750603 | 0.200812846 | 0.417665801 |
| cg15857051 | 14 | 0.00116103 | 0.164144473 | 0.38053358  |
| cg15942368 | 7  | 0.00534824 | 0.400301761 | 0.61643157  |
| cg18869244 | 17 | 0.00369301 | 0.19261768  | 0.408429538 |
| cg26891237 | 6  | 0.00504154 | 0.134599556 | 0.349711973 |
| cg27360992 | 22 | 0.0016533  | 0.243442995 | 0.458552627 |
| cg00491577 | 2  | 0.0141442  | 0.245351574 | 0.460323568 |
| cg21188409 | 3  | 0.00103065 | 0.305072438 | 0.518971344 |
| cg07698336 | 11 | 0.00440142 | 0.299507088 | 0.513322442 |
| cg08127108 | 2  | 0.00017261 | 0.31212543  | 0.524513463 |
| cg11596779 | 5  | 0.00032283 | 0.322192418 | 0.534579062 |
| cg14463995 | 9  | 0.00066009 | 0.270257027 | 0.482469094 |
| cg13755270 | 3  | 0.00112537 | 0.234593046 | 0.446741916 |
| cg01502811 | 16 | 0.00031979 | 0.538366351 | 0.750276319 |
| cg21879236 | 5  | 0.01217074 | 0.161462862 | 0.37333375  |
| cg19620668 | 7  | 0.00595327 | 0.202619682 | 0.413995702 |
| cg01328703 | 3  | 0.00098689 | 0.405394344 | 0.616427111 |
| cg26781392 | 6  | 0.00371748 | 0.454015405 | 0.664800403 |
| cg17164513 | 19 | 0.00382404 | 0.295246312 | 0.505903396 |
| cg00270974 | 6  | 0.0201855  | 0.152077214 | 0.362599221 |
| cg12207367 | 2  | 0.00483827 | 0.169314192 | 0.379567729 |
| cg14359798 | 11 | 0.02724097 | 0.39826349  | 0.608494042 |
| cg02064798 | 4  | 0.00024445 | 0.352675889 | 0.56283277  |
| cg21297366 | 6  | 0.00740671 | 0.530673323 | 0.740276319 |
| cg09505233 | 10 | 0.002544   | 0.40507874  | 0.614639851 |
| cg18767278 | 5  | 0.00135457 | 0.216955838 | 0.426214062 |
| cg13307782 | 5  | 0.0009745  | 0.309502087 | 0.51822395  |
| cg20208979 | 6  | 0.00148749 | 0.326692199 | 0.534834117 |
| cg19516754 | 6  | 0.00066183 | 0.200886798 | 0.408963623 |
| cg01099150 | 2  | 0.01547297 | 0.155081455 | 0.363107945 |
| cg08549390 | 7  | 0.00383784 | 0.164983152 | 0.372159971 |
| cg23751171 | 12 | 0.0008476  | 0.292971841 | 0.499830565 |
| cg08787698 | 2  | 0.00499975 | 0.373592771 | 0.579782648 |
| cg12019475 | 6  | 0.00603626 | 0.178666019 | 0.384688977 |
| cg16572600 | 11 | 4.07E-05   | 0.241889639 | 0.447906091 |
| cg07376067 | 1  | 0.01214237 | 0.477781381 | 0.683646548 |
| cg19225953 | 19 | 0.04341877 | 0.327582435 | 0.533438296 |
| cg16444826 | 2  | 0.00114543 | 0.213657775 | 0.418923799 |
| cg09425032 | 19 | 8.88E-05   | 0.258632919 | 0.463778961 |

|            |    |            |             |             |
|------------|----|------------|-------------|-------------|
| cg19595295 | 17 | 0.00104555 | 0.233809742 | 0.438304327 |
| cg09326079 | 2  | 0.00328146 | 0.324417515 | 0.528689562 |
| cg16757990 | 3  | 0.00152272 | 0.318278504 | 0.522311365 |
| cg24683121 | 2  | 0.00216957 | 0.617476892 | 0.82149298  |
| cg07950220 | 16 | 0.00545547 | 0.158807195 | 0.361809201 |
| cg17793497 | 15 | 0.01282752 | 0.306905205 | 0.509553524 |
| cg27411547 | 8  | 0.00157885 | 0.617575569 | 0.820102755 |
| cg06228857 | 15 | 0.00282864 | 0.345008707 | 0.547389809 |
| cg14191955 | 17 | 0.0004742  | 0.365547444 | 0.567764804 |
| cg22244039 | 4  | 0.0122171  | 0.545625549 | 0.747801405 |
| cg27511461 | 10 | 0.00041938 | 0.483539063 | 0.685620059 |
| cg00271204 | 5  | 0.00035687 | 0.302287142 | 0.504201378 |
| cg03371778 | 10 | 0.00042853 | 0.399951898 | 0.601558108 |
| cg05686379 | 7  | 0.00758387 | 0.201098386 | 0.402393102 |
| cg26207372 | 7  | 0.00997746 | 0.6434867   | 0.844730344 |
| cg26366958 | 2  | 0.00108372 | 0.427304969 | 0.628370848 |
| cg14833626 | 4  | 0.00406626 | 0.306961731 | 0.507714591 |
| cg12809483 | 5  | 0.00721063 | 0.357211167 | 0.557497761 |
| cg01269702 | 2  | 0.01213205 | 0.271492953 | 0.471662995 |
| cg08550517 | 16 | 0.00468583 | 0.252579032 | 0.452240389 |
| cg00196474 | 3  | 0.01265245 | 0.139873675 | 0.339529726 |
| cg03994717 | 6  | 0.00358462 | 0.182751366 | 0.382284867 |
| cg16036584 | 5  | 0.00647228 | 0.271560005 | 0.470258892 |
| cg23756265 | 11 | 0.00048607 | 0.389588027 | 0.58824189  |
| cg14060417 | 12 | 0.00969058 | 0.348233502 | 0.54650091  |
| cg15317129 | 3  | 0.00201051 | 0.526756023 | 0.724853674 |
| cg05881698 | 19 | 0.00053087 | 0.410222452 | 0.608218697 |
| cg26070099 | 1  | 0.0108547  | 0.30198103  | 0.499455079 |
| cg08082788 | 14 | 0.00633112 | 0.223316406 | 0.420429213 |
| cg23172911 | 1  | 0.00195431 | 0.148310359 | 0.345324865 |
| cg06814469 | 1  | 0.00014853 | 0.274821095 | 0.471739334 |
| cg15765889 | 2  | 0.00613784 | 0.227303728 | 0.424173967 |
| cg22282089 | 13 | 0.00153517 | 0.360925284 | 0.55758345  |
| cg19480965 | 6  | 0.02100454 | 0.262907684 | 0.459530727 |
| cg00866541 | 16 | 0.00177819 | 0.461932111 | 0.65849166  |
| cg12201544 | 6  | 0.00064643 | 0.322466615 | 0.518930331 |
| cg26072561 | 8  | 0.00156814 | 0.320505576 | 0.516794431 |
| cg25943481 | 15 | 0.00027682 | 0.363471003 | 0.559681239 |
| cg02518338 | 17 | 0.00861446 | 0.325067124 | 0.521208569 |
| cg09148630 | 6  | 0.00025065 | 0.192201663 | 0.388321265 |
| cg11378001 | 21 | 0.00024734 | 0.235313609 | 0.431028374 |
| cg00092565 | 21 | 0.00872019 | 0.196597758 | 0.392135447 |
| cg13534503 | 9  | 0.00023919 | 0.598384582 | 0.79384114  |
| cg14377849 | 1  | 0.01923986 | 0.166766212 | 0.362162606 |
| cg17419514 | 7  | 0.0018887  | 0.602753709 | 0.798075538 |
| cg23992493 | 17 | 7.88E-05   | 0.326538981 | 0.521845107 |

|            |    |            |             |             |
|------------|----|------------|-------------|-------------|
| cg26884359 | 17 | 0.00100923 | 0.188417034 | 0.383398629 |
| cg00101940 | 16 | 0.0009112  | 0.268378682 | 0.463085166 |
| cg10484693 | 10 | 0.00303663 | 0.191979759 | 0.386083787 |
| cg13445230 | 9  | 0.01041302 | 0.165170141 | 0.359195588 |
| cg13018639 | 14 | 0.01062722 | 0.495383704 | 0.689403014 |
| cg05276184 | 15 | 0.01003612 | 0.140738818 | 0.334553765 |
| cg03464765 | 11 | 0.00357975 | 0.544215202 | 0.738023138 |
| cg16377959 | 5  | 0.0034773  | 0.162886053 | 0.3565941   |
| cg23653492 | 12 | 0.01084747 | 0.279022426 | 0.472574596 |
| cg07230078 | 4  | 0.00085778 | 0.250372429 | 0.44390197  |
| cg10809958 | 7  | 0.02477624 | 0.381719132 | 0.575240966 |
| cg12331004 | 2  | 0.01101316 | 0.259234536 | 0.452652434 |
| cg02622846 | 11 | 0.02151372 | 0.342905473 | 0.536257184 |
| cg05153781 | 14 | 0.00053403 | 0.208688419 | 0.401551357 |
| cg16163174 | 6  | 0.00120572 | 0.408151213 | 0.6007686   |
| cg05599759 | 20 | 0.00247022 | 0.253267484 | 0.445848559 |
| cg09941601 | 16 | 0.00308431 | 0.25614834  | 0.448619489 |
| cg07545858 | 16 | 0.01677269 | 0.402048418 | 0.594196584 |
| cg03413253 | 12 | 0.00112414 | 0.526348517 | 0.718319366 |
| cg19241927 | 1  | 0.0354391  | 0.333043091 | 0.524728554 |
| cg05804846 | 11 | 0.00145306 | 0.16054205  | 0.351864797 |
| cg04962865 | 8  | 0.02948008 | 0.174217942 | 0.365387494 |
| cg04524475 | 13 | 0.00107722 | 0.317310585 | 0.508214573 |
| cg00792968 | 13 | 0.00637775 | 0.445424827 | 0.635676812 |
| cg14595617 | 2  | 0.00903564 | 0.260366593 | 0.450471513 |
| cg20597127 | 1  | 0.0080276  | 0.256666908 | 0.446689712 |
| cg00209612 | 4  | 0.015138   | 0.729911106 | 0.919802838 |
| cg00847221 | 17 | 0.01627456 | 0.377234781 | 0.567051289 |
| cg11466131 | 22 | 0.01121054 | 0.533278196 | 0.722631978 |
| cg21964252 | 1  | 0.0042359  | 0.48461543  | 0.673852151 |
| cg06151171 | 2  | 0.03635892 | 0.246750493 | 0.435873846 |
| cg04245294 | 3  | 0.00334619 | 0.382013023 | 0.570653604 |
| cg00782839 | 2  | 0.04432552 | 0.267181575 | 0.455688824 |
| cg22375757 | 3  | 0.00113115 | 0.395390485 | 0.583540758 |
| cg27657363 | 22 | 0.007168   | 0.319948923 | 0.507827773 |
| cg08672919 | 6  | 0.00509959 | 0.341910798 | 0.529520962 |
| cg04658679 | 12 | 0.04365791 | 0.286334218 | 0.47384619  |
| cg24571086 | 10 | 0.00076067 | 0.269142245 | 0.45658211  |
| cg04522792 | 8  | 0.01370239 | 0.145934134 | 0.333365013 |
| cg26415787 | 12 | 0.00033097 | 0.218397176 | 0.405363752 |
| cg25772185 | 10 | 0.01204815 | 0.174721633 | 0.361687106 |
| cg04361019 | 2  | 0.00894942 | 0.185901944 | 0.372774605 |
| cg16685313 | 1  | 0.00049849 | 0.209082293 | 0.395927431 |
| cg08071329 | 6  | 0.02956344 | 0.585128878 | 0.771878227 |
| cg27133959 | 3  | 0.03360602 | 0.354534232 | 0.540931509 |
| cg17091056 | 2  | 0.00600972 | 0.225550571 | 0.411911528 |



|            |    |            |             |             |
|------------|----|------------|-------------|-------------|
| cg27540865 | 1  | 0.00516737 | 0.115923494 | 0.302199304 |
| cg20187173 | 3  | 0.02134293 | 0.123422606 | 0.309659487 |
| cg12277789 | 10 | 0.00633663 | 0.309472119 | 0.495608789 |
| cg23863157 | 4  | 0.00714669 | 0.342120965 | 0.528068448 |
| cg02886375 | 8  | 0.01321273 | 0.409021222 | 0.594920487 |
| cg15305352 | 6  | 0.0241325  | 0.212443123 | 0.398295685 |
| cg12107466 | 10 | 0.00133684 | 0.49574549  | 0.681517984 |
| cg10992465 | 1  | 0.00628016 | 0.151142915 | 0.336894079 |
| cg13253210 | 10 | 4.66E-05   | 0.246372456 | 0.432047057 |
| cg26710983 | 16 | 0.00573878 | 0.360223912 | 0.545812646 |
| cg16864819 | 11 | 0.00459185 | 0.473477695 | 0.658977721 |
| cg11073813 | 6  | 0.00722241 | 0.18537194  | 0.370768073 |
| cg20101110 | 11 | 0.0331778  | 0.283024779 | 0.468382486 |
| cg03624438 | 3  | 0.00399212 | 0.302637214 | 0.487873738 |
| cg02370923 | 2  | 0.02681045 | 0.22593946  | 0.411162826 |
| cg12109883 | 15 | 0.00598478 | 0.221345409 | 0.406225543 |
| cg06801658 | 20 | 0.02429852 | 0.425810816 | 0.610299939 |
| cg18169505 | 4  | 0.00039285 | 0.318220174 | 0.502399056 |
| cg14380474 | 1  | 0.01908379 | 0.503215075 | 0.687167626 |
| cg21917512 | 2  | 0.02197452 | 0.22251318  | 0.406450026 |
| cg08037719 | 1  | 0.00823662 | 0.450772791 | 0.634531575 |
| cg17427675 | 5  | 0.00664068 | 0.432042158 | 0.615784944 |
| cg15065627 | 2  | 0.00817966 | 0.221584406 | 0.404957625 |
| cg27438754 | 16 | 0.02071005 | 0.267453207 | 0.450636385 |
| cg19704902 | 2  | 0.00158276 | 0.126200593 | 0.309189785 |
| cg03819089 | 2  | 0.02792649 | 0.446877677 | 0.629787589 |
| cg08873746 | 2  | 0.00035355 | 0.514516802 | 0.697016384 |
| cg24384120 | 10 | 0.00929665 | 0.164621804 | 0.346644524 |
| cg24465592 | 11 | 0.00657534 | 0.591725922 | 0.773682854 |
| cg01803461 | 16 | 0.00148089 | 0.206117712 | 0.387673658 |
| cg05021291 | 2  | 0.03508157 | 0.45445365  | 0.635698232 |
| cg19109570 | 18 | 0.01598433 | 0.443362131 | 0.624515204 |
| cg04536588 | 10 | 0.00432281 | 0.39430225  | 0.575403769 |
| cg22968789 | 15 | 0.00184995 | 0.220365921 | 0.401398722 |
| cg26343563 | 12 | 0.00116882 | 0.292732188 | 0.473680359 |
| cg08959094 | 16 | 0.00125972 | 0.253951767 | 0.434802053 |
| cg08918272 | 6  | 0.03950518 | 0.141043394 | 0.321519139 |
| cg13298632 | 2  | 0.00907629 | 0.692049628 | 0.872459268 |
| cg12389397 | 1  | 0.00156854 | 0.412964822 | 0.593096838 |
| cg00259279 | 1  | 0.00260757 | 0.346313135 | 0.526232542 |
| cg19771350 | 11 | 0.01310323 | 0.480600898 | 0.660488923 |
| cg16588492 | 12 | 0.0024566  | 0.328740372 | 0.508455848 |
| cg01081168 | 1  | 0.02508185 | 0.244657005 | 0.42433065  |
| cg00271177 | 3  | 0.00970296 | 0.175053072 | 0.354587208 |
| cg06238004 | 17 | 0.00201025 | 0.20254962  | 0.381777287 |
| cg09807446 | 16 | 0.00809663 | 0.33030985  | 0.509518699 |

|            |    |            |             |             |
|------------|----|------------|-------------|-------------|
| cg06453241 | 2  | 0.00238204 | 0.163456242 | 0.342642256 |
| cg14962025 | 11 | 0.01775113 | 0.473411108 | 0.65251467  |
| cg25109508 | 1  | 0.01213112 | 0.168790964 | 0.347784566 |
| cg08488569 | 4  | 0.00451183 | 0.228874084 | 0.407865335 |
| cg00540400 | 15 | 0.03378918 | 0.361416884 | 0.540194687 |
| cg19547330 | 5  | 0.00411471 | 0.224456863 | 0.403155486 |
| cg05959932 | 6  | 0.03148216 | 0.355354673 | 0.534018632 |
| cg01766505 | 17 | 0.03741429 | 0.370770208 | 0.549328561 |
| cg16016888 | 2  | 0.02797248 | 0.584889921 | 0.763444596 |
| cg02327773 | 7  | 0.02868718 | 0.151375703 | 0.329849606 |
| cg12204974 | 5  | 0.00375393 | 0.43507253  | 0.613280703 |
| cg08954863 | 10 | 0.00030547 | 0.49039685  | 0.668574455 |
| cg22680536 | 4  | 0.0027624  | 0.237172056 | 0.415038808 |
| cg19742687 | 11 | 0.00200052 | 0.345190311 | 0.523018084 |
| cg21408197 | 2  | 0.02765925 | 0.156906292 | 0.334643363 |
| cg17870997 | 2  | 0.00062583 | 0.345003322 | 0.522696571 |
| cg25912037 | 2  | 0.02204761 | 0.174813734 | 0.352330929 |
| cg23858650 | 12 | 0.01883768 | 0.209620756 | 0.387075232 |
| cg09788978 | 16 | 0.00055517 | 0.285024449 | 0.462451715 |
| cg26811425 | 16 | 0.00041304 | 0.164322985 | 0.341494134 |
| cg21386766 | 12 | 0.00238823 | 0.439619142 | 0.616572203 |
| cg25249728 | 2  | 0.00988647 | 0.173505687 | 0.35038389  |
| cg17432647 | 5  | 0.01556405 | 0.356525578 | 0.532802067 |
| cg01095004 | 16 | 0.00011579 | 0.257398749 | 0.433596639 |
| cg26047066 | 1  | 0.00046086 | 0.356605761 | 0.532745697 |
| cg17635080 | 12 | 0.00310968 | 0.375448618 | 0.551532686 |
| cg07066163 | 16 | 2.83E-05   | 0.596833467 | 0.772898117 |
| cg09007841 | 16 | 0.00049054 | 0.241112994 | 0.417049583 |
| cg07765595 | 16 | 4.99E-05   | 0.359463411 | 0.535303323 |
| cg18992570 | 5  | 0.00031131 | 0.271670571 | 0.447382632 |
| cg04029134 | 17 | 0.01798767 | 0.644266168 | 0.819761252 |
| cg07095818 | 20 | 0.00158423 | 0.187696479 | 0.36298499  |
| cg05917797 | 14 | 0.03797016 | 0.092449671 | 0.267379711 |
| cg20481247 | 10 | 0.00250518 | 0.533965319 | 0.708830124 |
| cg24537275 | 17 | 0.00099629 | 0.485648022 | 0.660424367 |
| cg06271720 | 2  | 0.04425639 | 0.198840643 | 0.373595854 |
| cg11826295 | 10 | 0.00053147 | 0.412534664 | 0.587224274 |
| cg03209398 | 2  | 0.00298084 | 0.180193426 | 0.35487712  |
| cg05382185 | 6  | 0.02007157 | 0.4535734   | 0.628245902 |
| cg25601481 | 6  | 0.000313   | 0.373078795 | 0.547594932 |
| cg16020437 | 12 | 0.01706117 | 0.115500803 | 0.289869806 |
| cg20098468 | 8  | 0.01768026 | 0.260631375 | 0.434890943 |
| cg00594191 | 10 | 0.00056713 | 0.167684653 | 0.341897773 |
| cg19629079 | 12 | 0.02137739 | 0.31951096  | 0.49352886  |
| cg07531093 | 8  | 0.01551298 | 0.177601471 | 0.351425446 |
| cg01263407 | 10 | 0.01008176 | 0.290464266 | 0.464259494 |

|            |    |            |             |             |
|------------|----|------------|-------------|-------------|
| cg04690342 | 2  | 0.02648908 | 0.207883463 | 0.381566462 |
| cg14961690 | 11 | 0.02423107 | 0.280166419 | 0.45365365  |
| cg11932575 | 4  | 0.03980585 | 0.212041843 | 0.385408464 |
| cg21463446 | 8  | 0.00251421 | 0.510419301 | 0.683643138 |
| cg10354926 | 13 | 0.00723982 | 0.269439112 | 0.442635552 |
| cg25232786 | 3  | 0.01207711 | 0.573797662 | 0.746900967 |
| cg27423739 | 3  | 0.00086149 | 0.196368128 | 0.369458041 |
| cg16455376 | 16 | 0.00047682 | 0.192364113 | 0.365435354 |
| cg07478240 | 16 | 0.00035687 | 0.196063079 | 0.369068692 |
| cg11936809 | 8  | 0.00639635 | 0.362628539 | 0.535566863 |
| cg24916055 | 6  | 0.00338476 | 0.692528737 | 0.86538247  |
| cg15339026 | 13 | 0.00739236 | 0.107707331 | 0.2804697   |
| cg16600876 | 8  | 0.01454168 | 0.268764649 | 0.441486394 |
| cg00459898 | 2  | 0.00612461 | 0.171061289 | 0.343764535 |
| cg20824201 | 2  | 0.00123056 | 0.345486821 | 0.518136464 |
| cg21240684 | 2  | 0.00085286 | 0.427385495 | 0.600013191 |
| cg22183373 | 4  | 0.04477384 | 0.503090763 | 0.675702587 |
| cg03055271 | 1  | 0.00563984 | 0.351552653 | 0.524161236 |
| cg07818978 | 15 | 0.00667541 | 0.235317403 | 0.407878721 |
| cg04152616 | 16 | 0.00577668 | 0.128594236 | 0.301149932 |
| cg02807786 | 12 | 0.00212219 | 0.515845435 | 0.688340485 |
| cg05098589 | 10 | 0.00078528 | 0.624764385 | 0.797259177 |
| cg20741418 | 11 | 0.00391736 | 0.26465658  | 0.437111863 |
| cg09501314 | 15 | 0.00229967 | 0.174891839 | 0.347264728 |
| cg07593205 | 10 | 0.00230022 | 0.187608601 | 0.359819347 |
| cg25114855 | 2  | 0.00016369 | 0.628658706 | 0.800865266 |
| cg04251886 | 14 | 0.00833362 | 0.459425516 | 0.631595093 |
| cg01387072 | 4  | 0.00027597 | 0.326228607 | 0.498350621 |
| cg25695992 | 2  | 0.00526261 | 0.528270919 | 0.700355535 |
| cg14390263 | 9  | 0.01997565 | 0.174516322 | 0.346309344 |
| cg02084467 | 17 | 0.00688465 | 0.16807943  | 0.339801546 |
| cg00549064 | 16 | 0.00479718 | 0.110636796 | 0.282312315 |
| cg26853787 | 2  | 0.02100755 | 0.31741071  | 0.489037641 |
| cg09814448 | 1  | 0.01420283 | 0.338849919 | 0.510433151 |
| cg15337521 | 5  | 0.00113396 | 0.549513597 | 0.721076274 |
| cg01099300 | 10 | 0.00886131 | 0.163068163 | 0.334610177 |
| cg27107963 | 18 | 0.00796668 | 0.326562608 | 0.49795663  |
| cg08026493 | 8  | 0.00022296 | 0.371046678 | 0.542351535 |
| cg03665255 | 6  | 0.02381159 | 0.248099065 | 0.419379219 |
| cg02516703 | 5  | 0.00373228 | 0.387088579 | 0.558040581 |
| cg23487517 | 11 | 0.0325064  | 0.189544843 | 0.360428873 |
| cg06089606 | 3  | 0.00266459 | 0.24749041  | 0.41831767  |
| cg11680908 | 5  | 6.24E-05   | 0.674461077 | 0.845246215 |
| cg00615941 | 3  | 0.00174521 | 0.4254726   | 0.596148555 |
| cg25149122 | 18 | 0.00174009 | 0.349195709 | 0.519853119 |
| cg12551394 | 12 | 0.00112291 | 0.484429993 | 0.655081211 |

|            |    |            |             |             |
|------------|----|------------|-------------|-------------|
| cg17969662 | 1  | 0.003782   | 0.513737511 | 0.684382012 |
| cg13454978 | 8  | 0.0051816  | 0.374471455 | 0.544935582 |
| cg09197279 | 2  | 0.00237958 | 0.27390233  | 0.444327952 |
| cg18553570 | 12 | 0.01416111 | 0.158094724 | 0.328289374 |
| cg03656290 | 4  | 0.00133039 | 0.18357713  | 0.3537604   |
| cg26373051 | 2  | 0.00831294 | 0.191714933 | 0.361861508 |
| cg14462369 | 6  | 0.00641806 | 0.32460713  | 0.494594848 |
| cg03343669 | 2  | 0.00262792 | 0.276442631 | 0.446320366 |
| cg13385601 | 15 | 0.0086579  | 0.172761023 | 0.342538307 |
| cg01394884 | 4  | 0.00286291 | 0.168138987 | 0.337817799 |
| cg05932560 | 16 | 0.00435994 | 0.156627838 | 0.326026523 |
| cg26573923 | 16 | 0.00793665 | 0.395186694 | 0.564547957 |
| cg15920561 | 14 | 0.02877029 | 0.40106081  | 0.570381575 |
| cg01765623 | 17 | 0.00420023 | 0.166553564 | 0.335841489 |
| cg26703511 | 21 | 0.00127731 | 0.356406156 | 0.525625155 |
| cg08474521 | 7  | 0.00158381 | 0.286726286 | 0.455944105 |
| cg09214892 | 16 | 0.00290892 | 0.56069234  | 0.729909341 |
| cg07148025 | 5  | 0.00355209 | 0.135594358 | 0.304809172 |
| cg15360478 | 2  | 0.01980539 | 0.237513256 | 0.406518407 |
| cg20545907 | 5  | 0.03389055 | 0.335758539 | 0.504697662 |
| cg02305412 | 1  | 0.00818325 | 0.406808764 | 0.575734566 |
| cg22374586 | 2  | 0.0018825  | 0.208126816 | 0.377013118 |
| cg10624395 | 11 | 0.00979285 | 0.217833515 | 0.386547534 |
| cg08819431 | 5  | 0.01747661 | 0.11173314  | 0.280361933 |
| cg27317919 | 7  | 0.0027947  | 0.340209715 | 0.508437404 |
| cg26057577 | 2  | 0.00174366 | 0.222782116 | 0.390995244 |
| cg04313941 | 15 | 5.62E-05   | 0.614517069 | 0.782728637 |
| cg06144418 | 2  | 0.00947938 | 0.549744513 | 0.717826865 |
| cg10334741 | 11 | 0.00092056 | 0.161769159 | 0.329809885 |
| cg18758281 | 2  | 0.01682139 | 0.20818796  | 0.376220956 |
| cg03585720 | 1  | 0.0391804  | 0.511258713 | 0.679195976 |
| cg10476950 | 7  | 0.00153278 | 0.607273035 | 0.775100247 |
| cg23608384 | 13 | 0.00352282 | 0.487802774 | 0.655507131 |
| cg06720014 | 1  | 0.01179822 | 0.41204386  | 0.579595216 |
| cg17141972 | 6  | 0.00013939 | 0.638537547 | 0.805838239 |
| cg14482712 | 15 | 0.00106516 | 0.319195471 | 0.486456764 |
| cg01433527 | 7  | 0.00420438 | 0.389959668 | 0.557140412 |
| cg08653258 | 3  | 0.0390846  | 0.340879052 | 0.507901241 |
| cg10658307 | 11 | 0.00554484 | 0.158625513 | 0.325403823 |
| cg16469927 | 5  | 0.01617384 | 0.334119705 | 0.500806385 |
| cg25769127 | 3  | 0.00191593 | 0.3470375   | 0.513650492 |
| cg21470704 | 2  | 0.0134749  | 0.34755838  | 0.514135335 |
| cg17504641 | 10 | 0.00031671 | 0.320707097 | 0.487192239 |
| cg02681163 | 8  | 0.00572897 | 0.375979357 | 0.542350683 |
| cg03262260 | 16 | 0.00021385 | 0.204311055 | 0.370567172 |
| cg05753629 | 1  | 0.00415102 | 0.428462346 | 0.594601498 |

|            |    |            |             |             |
|------------|----|------------|-------------|-------------|
| cg16139202 | 5  | 0.00137133 | 0.221550671 | 0.387655731 |
| cg14111437 | 5  | 0.04373718 | 0.140980753 | 0.306915701 |
| cg05199904 | 5  | 0.00165354 | 0.148017083 | 0.313888516 |
| cg11411968 | 3  | 0.00024261 | 0.527641072 | 0.693464344 |
| cg19290938 | 11 | 0.00021379 | 0.381802305 | 0.547558464 |
| cg16937583 | 3  | 0.00186668 | 0.34447745  | 0.510192476 |
| cg21545013 | 1  | 0.00022924 | 0.284037619 | 0.449725052 |
| cg14360029 | 9  | 0.00408772 | 0.146774313 | 0.312447954 |
| cg12146763 | 17 | 0.00359478 | 0.169692466 | 0.335251642 |
| cg09274961 | 16 | 0.03225498 | 0.360000496 | 0.525271282 |
| cg02642891 | 10 | 0.00679871 | 0.468489312 | 0.633737989 |
| cg24930059 | 17 | 0.00294589 | 0.188382577 | 0.353612886 |
| cg13935765 | 9  | 0.00043878 | 0.499487005 | 0.664340071 |
| cg06193628 | 2  | 0.00237407 | 0.336695357 | 0.501403266 |
| cg01481978 | 16 | 0.01095686 | 0.307800347 | 0.472487713 |
| cg21284524 | 6  | 0.0131787  | 0.452289325 | 0.616963146 |
| cg18451016 | 1  | 0.0006377  | 0.128733175 | 0.293281541 |
| cg27230594 | 1  | 0.00028483 | 0.262880075 | 0.427336158 |
| cg09256716 | 17 | 0.02313473 | 0.13305453  | 0.297480168 |
| cg08305808 | 15 | 0.00705398 | 0.161398255 | 0.325749077 |
| cg04914930 | 13 | 0.00940494 | 0.1802532   | 0.344561786 |
| cg22303083 | 8  | 0.02272702 | 0.323324678 | 0.487595504 |
| cg13391028 | 11 | 0.01165505 | 0.148505606 | 0.312744616 |
| cg19763682 | 13 | 0.00161376 | 0.477768261 | 0.641903467 |
| cg16425161 | 15 | 0.01097323 | 0.339973155 | 0.504087858 |
| cg00688246 | 3  | 0.02483862 | 0.137827252 | 0.301884804 |
| cg17777603 | 8  | 0.04697944 | 0.527506759 | 0.691516022 |
| cg01984854 | 16 | 0.00069402 | 0.294136577 | 0.458126648 |
| cg19411952 | 8  | 0.01059642 | 0.179519072 | 0.34343116  |
| cg09548241 | 1  | 0.00218992 | 0.128944563 | 0.292851914 |
| cg04127867 | 7  | 0.00017449 | 0.476593785 | 0.640432963 |
| cg16206344 | 6  | 0.00882861 | 0.35627988  | 0.519772264 |
| cg02347249 | 12 | 0.01254292 | 0.37474159  | 0.538119896 |
| cg02383285 | 6  | 0.00063697 | 0.231948642 | 0.39531563  |
| cg09320079 | 16 | 0.01545587 | 0.193832524 | 0.357005173 |
| cg22725830 | 13 | 0.00303084 | 0.326789438 | 0.489953787 |
| cg08326300 | 10 | 0.02079082 | 0.164669403 | 0.327774172 |
| cg05928033 | 1  | 8.88E-05   | 0.232138681 | 0.395034368 |
| cg14327359 | 2  | 0.00423044 | 0.366974103 | 0.529856634 |
| cg19248958 | 10 | 0.0142226  | 0.56783821  | 0.73069969  |
| cg20650914 | 13 | 0.04062673 | 0.485147005 | 0.647953895 |
| cg09296742 | 14 | 0.03172666 | 0.273272903 | 0.436014431 |
| cg06626168 | 8  | 0.01823359 | 0.2083639   | 0.371057597 |
| cg07909444 | 17 | 0.00377233 | 0.400932352 | 0.563540344 |
| cg16322269 | 8  | 0.00171093 | 0.453918578 | 0.616496012 |
| cg25203310 | 8  | 0.00595297 | 0.461595511 | 0.624153671 |

|            |    |            |             |             |
|------------|----|------------|-------------|-------------|
| cg03742250 | 17 | 0.00967567 | 0.270101152 | 0.432583301 |
| cg14706297 | 2  | 0.00015619 | 0.132584549 | 0.29502125  |
| cg06761167 | 16 | 0.00116819 | 0.292547955 | 0.454944727 |
| cg06389605 | 6  | 0.00933407 | 0.225825289 | 0.388106631 |
| cg08390381 | 16 | 0.00157943 | 0.6890521   | 0.851218935 |
| cg07220149 | 17 | 0.00657201 | 0.268668663 | 0.430762026 |
| cg17516571 | 8  | 0.01288878 | 0.272328815 | 0.434359855 |
| cg04609694 | 6  | 0.01769546 | 0.253207002 | 0.415216897 |
| cg10410412 | 10 | 0.00794825 | 0.313341381 | 0.475273153 |
| cg07482222 | 19 | 0.01159694 | 0.425228561 | 0.587147534 |
| cg26702098 | 8  | 0.00645187 | 0.41012735  | 0.571987895 |
| cg03221837 | 16 | 0.01119909 | 0.321682632 | 0.483534356 |
| cg12030226 | 11 | 0.00308468 | 0.196045919 | 0.35779335  |
| cg10783149 | 14 | 0.00441754 | 0.260021373 | 0.421695142 |
| cg17723381 | 12 | 0.01165628 | 0.142788269 | 0.304434024 |
| cg02800216 | 2  | 0.00050134 | 0.334999564 | 0.496550599 |
| cg12499062 | 18 | 0.00141659 | 0.281299005 | 0.44247929  |
| cg01915328 | 14 | 0.00861933 | 0.125083749 | 0.286258353 |
| cg17540450 | 13 | 0.02361514 | 0.312119307 | 0.473180467 |
| cg00506828 | 4  | 0.01516097 | 0.550658962 | 0.711666206 |
| cg14297340 | 9  | 0.02478826 | 0.166388538 | 0.327312647 |
| cg02506248 | 12 | 0.03001281 | 0.259720448 | 0.420643607 |
| cg24690715 | 20 | 0.0275998  | 0.349508889 | 0.510366822 |
| cg20244327 | 10 | 0.01573013 | 0.127686452 | 0.288322206 |
| cg18384190 | 10 | 0.0159821  | 0.400180413 | 0.560786622 |
| cg10903132 | 10 | 0.00813425 | 0.539775375 | 0.700362715 |
| cg01230988 | 17 | 0.01265978 | 0.224205489 | 0.384744197 |
| cg03595986 | 8  | 0.03748256 | 0.255798005 | 0.41629671  |
| cg02433979 | 7  | 0.00315105 | 0.250561705 | 0.411035112 |
| cg10506844 | 10 | 0.0068242  | 0.278486073 | 0.438827945 |
| cg00997998 | 14 | 0.00082972 | 0.620224472 | 0.780477795 |
| cg10114877 | 2  | 0.03449503 | 0.370314748 | 0.530536866 |
| cg13647973 | 19 | 0.00078109 | 0.281458961 | 0.4416021   |
| cg01536979 | 8  | 0.00374113 | 0.211110302 | 0.371041671 |
| cg08264835 | 1  | 0.01731304 | 0.438835906 | 0.598747885 |
| cg05777602 | 16 | 0.00626282 | 0.546482572 | 0.706262882 |
| cg02307664 | 2  | 0.00370689 | 0.409411261 | 0.569148296 |
| cg03096954 | 16 | 0.0021702  | 0.323771554 | 0.48339915  |
| cg25526960 | 10 | 0.0082438  | 0.272354878 | 0.431954936 |
| cg00909401 | 2  | 0.00103015 | 0.557813211 | 0.717367545 |
| cg02470587 | 12 | 0.0019262  | 0.104060551 | 0.263495248 |
| cg18064917 | 2  | 0.01479966 | 0.4508603   | 0.610292395 |
| cg01385708 | 16 | 0.00642881 | 0.132237709 | 0.291587367 |
| cg16063018 | 12 | 0.01126116 | 0.370062991 | 0.529391007 |
| cg11286742 | 3  | 0.00819868 | 0.58460823  | 0.743913958 |
| cg21034034 | 2  | 0.02354711 | 0.162213251 | 0.321382578 |

|            |    |            |             |             |
|------------|----|------------|-------------|-------------|
| cg06575772 | 8  | 0.00046607 | 0.554969694 | 0.714127879 |
| cg00016238 | 1  | 0.00273942 | 0.655183236 | 0.813949629 |
| cg23332827 | 11 | 0.00262326 | 0.307697557 | 0.466391422 |
| cg24030485 | 13 | 0.00700422 | 0.359401134 | 0.517736575 |
| cg21920167 | 14 | 0.04883066 | 0.455506089 | 0.613784371 |
| cg03810376 | 1  | 0.01613035 | 0.158742088 | 0.317012603 |
| cg10174683 | 16 | 0.00124465 | 0.371491817 | 0.529710244 |
| cg12684999 | 2  | 0.00398915 | 0.298538731 | 0.456740848 |
| cg19499614 | 17 | 0.00906254 | 0.17169328  | 0.329894663 |
| cg04132407 | 7  | 0.02049237 | 0.203046222 | 0.361244409 |
| cg04852323 | 16 | 0.00095615 | 0.450955075 | 0.609091327 |
| cg23418467 | 4  | 0.00011804 | 0.190229415 | 0.348325169 |
| cg18985738 | 11 | 0.01814858 | 0.164917813 | 0.322898536 |
| cg23201188 | 3  | 0.03612465 | 0.365471053 | 0.523421323 |
| cg27022420 | 17 | 0.00069541 | 0.528096843 | 0.685575351 |
| cg05998301 | 2  | 0.01828307 | 0.438660815 | 0.596029518 |
| cg25051510 | 12 | 0.00159069 | 0.374477438 | 0.531745104 |
| cg14326909 | 6  | 0.02386295 | 0.310526115 | 0.467751234 |
| cg18749015 | 6  | 0.0003122  | 0.138021978 | 0.295227334 |
| cg14951856 | 10 | 0.00070928 | 0.487415053 | 0.644593124 |
| cg26345916 | 3  | 0.00109596 | 0.161675229 | 0.318850477 |
| cg25430713 | 2  | 0.00406031 | 0.222286603 | 0.379442131 |
| cg18833994 | 5  | 0.01031088 | 0.352726794 | 0.509761473 |
| cg12518626 | 4  | 0.01404071 | 0.670071321 | 0.826911254 |
| cg22501483 | 7  | 0.01636327 | 0.3639136   | 0.520731393 |
| cg20743628 | 7  | 0.03200399 | 0.243393191 | 0.400151671 |
| cg27596297 | 10 | 0.02287447 | 0.144621102 | 0.301334098 |
| cg03970900 | 1  | 0.00259092 | 0.167441836 | 0.324149411 |
| cg03512577 | 16 | 6.44E-05   | 0.193131501 | 0.349832527 |
| cg18542967 | 7  | 0.0499217  | 0.156241088 | 0.312926156 |
| cg09772333 | 19 | 0.00538523 | 0.278740503 | 0.435406484 |
| cg07879474 | 5  | 0.00749355 | 0.274935342 | 0.431580056 |
| cg27614376 | 3  | 0.01778595 | 0.360749286 | 0.517387699 |
| cg10525394 | 6  | 0.00026681 | 0.409980952 | 0.566538506 |
| cg01072388 | 16 | 0.01586899 | 0.222488952 | 0.379015066 |
| cg14523804 | 17 | 0.01585655 | 0.559668118 | 0.716170553 |
| cg15294263 | 21 | 0.0004429  | 0.267251273 | 0.423386873 |
| cg09223687 | 4  | 0.00105217 | 0.226944959 | 0.382802268 |
| cg24926185 | 1  | 0.04059349 | 0.4603945   | 0.616237467 |
| cg19359940 | 13 | 0.02508092 | 0.520857933 | 0.676666581 |
| cg25556051 | 4  | 0.02044491 | 0.428728281 | 0.584529902 |
| cg05540639 | 16 | 0.00541073 | 0.242227331 | 0.397850288 |
| cg07126126 | 16 | 0.01557177 | 0.586822008 | 0.74242416  |
| cg19363785 | 8  | 0.0143658  | 0.493245636 | 0.648826857 |
| cg20073893 | 14 | 0.0013563  | 0.408337702 | 0.563896649 |
| cg23681616 | 17 | 0.00232764 | 0.596025866 | 0.751525413 |

|            |    |            |             |             |
|------------|----|------------|-------------|-------------|
| cg11219976 | 12 | 0.00367549 | 0.412621887 | 0.568036032 |
| cg00927503 | 2  | 0.00211172 | 0.615688292 | 0.771095812 |
| cg19699170 | 2  | 0.00539678 | 0.336989914 | 0.492343875 |
| cg19112357 | 3  | 0.00043254 | 0.353406985 | 0.508693514 |
| cg17082026 | 13 | 0.01198419 | 0.47347641  | 0.628475131 |
| cg26159128 | 4  | 0.03389477 | 0.148917487 | 0.303761314 |
| cg22143274 | 5  | 0.00944026 | 0.449448547 | 0.604279124 |
| cg00423598 | 7  | 0.0266375  | 0.352716276 | 0.507478358 |
| cg26785370 | 17 | 0.00404881 | 0.342932855 | 0.497576298 |
| cg18879198 | 2  | 0.00756364 | 0.393918656 | 0.548553393 |
| cg10031989 | 16 | 0.00950148 | 0.192705477 | 0.347293217 |
| cg07579884 | 14 | 0.01943424 | 0.350353156 | 0.504825004 |
| cg05225634 | 6  | 0.0004767  | 0.303685709 | 0.458141636 |
| cg13697968 | 13 | 0.00341055 | 0.347824011 | 0.502108081 |
| cg23844085 | 18 | 0.00899978 | 0.26347545  | 0.417655578 |
| cg22992137 | 2  | 0.00513721 | 0.538743258 | 0.692874505 |
| cg07467854 | 3  | 0.02608737 | 0.150271754 | 0.304242913 |
| cg25552018 | 1  | 0.03579894 | 0.403415699 | 0.557208782 |
| cg08057411 | 16 | 0.00296781 | 0.466482837 | 0.620256567 |
| cg22919538 | 3  | 0.00574146 | 0.573269628 | 0.726990514 |
| cg21351437 | 4  | 0.02389346 | 0.337676401 | 0.491303348 |
| cg15135803 | 1  | 0.00961667 | 0.12047316  | 0.273998778 |
| cg18712566 | 13 | 0.0332966  | 0.407319169 | 0.560826701 |
| cg08055994 | 2  | 0.00297953 | 0.416593893 | 0.56993651  |
| cg17077180 | 1  | 0.00040104 | 0.24401476  | 0.397205087 |
| cg17451493 | 10 | 0.00108886 | 0.571725446 | 0.724903385 |
| cg14574066 | 11 | 0.00329335 | 0.183053188 | 0.336189645 |
| cg24296187 | 1  | 0.01507245 | 0.160979419 | 0.314095995 |
| cg20683802 | 5  | 0.00093073 | 0.348879909 | 0.501964072 |
| cg16893634 | 3  | 0.00617178 | 0.17798837  | 0.331028548 |
| cg24527636 | 1  | 0.01428091 | 0.223678756 | 0.376685675 |
| cg01558281 | 1  | 0.00161602 | 0.230815431 | 0.383660227 |
| cg02451502 | 13 | 0.00473877 | 0.186910159 | 0.339692755 |
| cg24516106 | 2  | 0.00879278 | 0.182259758 | 0.335005944 |
| cg11394820 | 2  | 0.00069592 | 0.278764707 | 0.43149926  |
| cg24453604 | 1  | 0.04804218 | 0.206787589 | 0.359515588 |
| cg14709069 | 5  | 0.01364635 | 0.690836362 | 0.843312834 |
| cg14256511 | 12 | 0.00328681 | 0.543484464 | 0.695952384 |
| cg04130549 | 6  | 0.00289647 | 0.159829664 | 0.312225056 |
| cg16311740 | 3  | 0.00143371 | 0.357254718 | 0.509527055 |
| cg08374552 | 5  | 0.00258393 | 0.406122229 | 0.558350475 |
| cg06002476 | 3  | 0.0213434  | 0.327510789 | 0.479712945 |
| cg15556591 | 4  | 0.00168317 | 0.316567613 | 0.468722887 |
| cg09089118 | 7  | 0.0070536  | 0.311577156 | 0.463690502 |
| cg01215742 | 16 | 0.00214331 | 0.163802821 | 0.315913736 |
| cg00491530 | 12 | 0.00052338 | 0.460269228 | 0.612338261 |



|            |    |            |             |             |
|------------|----|------------|-------------|-------------|
| cg02249233 | 2  | 0.00561946 | 0.365067891 | 0.517124222 |
| cg14445366 | 17 | 0.00892184 | 0.317105353 | 0.469135336 |
| cg24828316 | 2  | 0.01600618 | 0.13742092  | 0.28944941  |
| cg26699655 | 11 | 0.02661859 | 0.183030158 | 0.335039076 |
| cg20267580 | 1  | 0.00339971 | 0.270547034 | 0.422365311 |
| cg12313892 | 15 | 0.00890582 | 0.224997575 | 0.376766196 |
| cg05339976 | 2  | 0.00198145 | 0.325585741 | 0.477303986 |
| cg07208172 | 1  | 0.0012557  | 0.503834172 | 0.655494206 |
| cg03548062 | 14 | 0.00817507 | 0.195602399 | 0.347253985 |
| cg12320986 | 6  | 0.00040965 | 0.225111365 | 0.376691392 |
| cg14799129 | 3  | 0.00390123 | 0.532529649 | 0.684021163 |
| cg13821914 | 11 | 0.00084786 | 0.246987231 | 0.398418217 |
| cg04607671 | 16 | 0.00046184 | 0.436374082 | 0.587760494 |
| cg00051307 | 5  | 0.0399737  | 0.416125224 | 0.567375315 |
| cg01250141 | 7  | 0.00484804 | 0.658066426 | 0.809108868 |
| cg21464704 | 6  | 0.0104471  | 0.152364532 | 0.303300912 |
| cg23101632 | 2  | 0.01775944 | 0.126869492 | 0.277765825 |
| cg01550810 | 1  | 0.01501401 | 0.594113671 | 0.744959234 |
| cg20944521 | 14 | 0.00341966 | 0.534301409 | 0.685127579 |
| cg14883605 | 14 | 0.01473381 | 0.277772134 | 0.428584954 |
| cg11818127 | 12 | 0.00036111 | 0.151973076 | 0.302719162 |
| cg01477361 | 2  | 0.0004367  | 0.654198704 | 0.804878438 |
| cg00286119 | 8  | 0.023161   | 0.227926417 | 0.378594391 |
| cg00317585 | 4  | 0.00132552 | 0.3563153   | 0.506799069 |
| cg09267467 | 1  | 0.00177863 | 0.177499514 | 0.327948202 |
| cg15417287 | 12 | 0.00128089 | 0.154908096 | 0.305319514 |
| cg00366236 | 17 | 0.01905987 | 0.412233708 | 0.562620389 |
| cg14125530 | 12 | 0.00426298 | 0.173941204 | 0.3242941   |
| cg24720604 | 5  | 0.02160213 | 0.178334246 | 0.328680535 |
| cg11707796 | 13 | 0.00317096 | 0.284818968 | 0.435097555 |
| cg23226249 | 1  | 0.01018774 | 0.282267321 | 0.432502117 |
| cg08243094 | 1  | 0.01920257 | 0.426126584 | 0.57634297  |
| cg03743262 | 7  | 0.0165527  | 0.201719824 | 0.351914948 |
| cg27415425 | 8  | 0.01876444 | 0.438266236 | 0.588377288 |
| cg04063906 | 7  | 0.01051839 | 0.532929196 | 0.682971243 |
| cg14705155 | 6  | 0.00243511 | 0.368849514 | 0.518877654 |
| cg06233186 | 12 | 0.01814154 | 0.292049497 | 0.441988185 |
| cg20387391 | 4  | 0.00201752 | 0.29124456  | 0.44113486  |
| cg02711510 | 16 | 0.03361904 | 0.094331044 | 0.244023915 |
| cg26107642 | 5  | 0.0355684  | 0.270963467 | 0.42065538  |
| cg23003225 | 3  | 0.02796093 | 0.486556085 | 0.636242074 |
| cg07197092 | 2  | 0.00864767 | 0.501918956 | 0.651597519 |
| cg15419378 | 17 | 0.00399597 | 0.546173473 | 0.695825902 |
| cg00624589 | 16 | 0.00107058 | 0.326004091 | 0.475609686 |
| cg16528596 | 16 | 0.00133957 | 0.258681052 | 0.408270253 |
| cg27177808 | 1  | 0.02089663 | 0.238011643 | 0.38755943  |

|            |    |            |             |             |
|------------|----|------------|-------------|-------------|
| cg09056876 | 6  | 0.00185104 | 0.221007286 | 0.370301032 |
| cg15506703 | 2  | 0.02597501 | 0.322674115 | 0.471663405 |
| cg17008160 | 1  | 0.00381556 | 0.515333019 | 0.664304571 |
| cg00527307 | 13 | 0.00911213 | 0.597401715 | 0.746249701 |
| cg22761483 | 2  | 0.03948248 | 0.40865973  | 0.557342322 |
| cg10088622 | 1  | 0.02949516 | 0.124833335 | 0.273464335 |
| cg01571001 | 3  | 0.00036077 | 0.19749884  | 0.346108254 |
| cg06123700 | 1  | 0.01318832 | 0.219954866 | 0.368443098 |
| cg09502464 | 7  | 0.03414869 | 0.243344483 | 0.391831812 |
| cg14200631 | 14 | 0.00445744 | 0.352928431 | 0.501372187 |
| cg06984848 | 16 | 0.00222705 | 0.180879935 | 0.329232895 |
| cg10263737 | 16 | 0.00279035 | 0.339352559 | 0.487687648 |
| cg07554408 | 14 | 0.03388197 | 0.209053649 | 0.357350361 |
| cg00043444 | 6  | 0.03081327 | 0.518776781 | 0.667064974 |
| cg00583861 | 1  | 0.00340662 | 0.201269346 | 0.349556597 |
| cg13604150 | 21 | 0.0108015  | 0.668875705 | 0.817087873 |
| cg11254532 | 1  | 0.00195698 | 0.302692316 | 0.450871479 |
| cg25428177 | 4  | 0.00463988 | 0.226640713 | 0.374818573 |
| cg15171155 | 3  | 0.00074104 | 0.546672323 | 0.694826881 |
| cg13235761 | 1  | 0.00534964 | 0.184584858 | 0.332687806 |
| cg24691330 | 8  | 0.00266848 | 0.549371111 | 0.697317073 |
| cg04143592 | 16 | 0.01158712 | 0.197586032 | 0.345451055 |
| cg22225179 | 17 | 0.04151854 | 0.363387662 | 0.511216484 |
| cg08691159 | 16 | 1.85E-05   | 0.385328375 | 0.533147743 |
| cg20219172 | 17 | 0.0002122  | 0.453489923 | 0.601266491 |
| cg11407801 | 1  | 0.00061887 | 0.567693799 | 0.715451756 |
| cg25920857 | 3  | 0.00280155 | 0.398263952 | 0.546017978 |
| cg20778022 | 7  | 0.00299206 | 0.577231415 | 0.724954132 |
| cg26986629 | 2  | 0.01766129 | 0.274306268 | 0.421927262 |
| cg00562598 | 17 | 0.00059176 | 0.463184881 | 0.610798776 |
| cg08798244 | 10 | 0.00543371 | 0.258108314 | 0.40565237  |
| cg04879750 | 12 | 0.00045961 | 0.234556331 | 0.382094572 |
| cg15197458 | 19 | 0.00586884 | 0.398468866 | 0.545934404 |
| cg11792824 | 6  | 0.00938325 | 0.418612424 | 0.566055317 |
| cg17223748 | 11 | 0.00011921 | 0.237568657 | 0.384787843 |
| cg06351537 | 22 | 0.00642499 | 0.276963855 | 0.424178471 |
| cg19735151 | 10 | 0.01967046 | 0.45769619  | 0.604861217 |
| cg01089914 | 2  | 0.01375966 | 0.28658226  | 0.433623309 |
| cg14130595 | 9  | 0.00017998 | 0.205444809 | 0.352357949 |
| cg19419246 | 19 | 0.00197009 | 0.36481348  | 0.51159373  |
| cg23899450 | 2  | 0.00142275 | 0.435137951 | 0.58179267  |
| cg01962750 | 2  | 0.02706264 | 0.384119916 | 0.530767155 |
| cg10717691 | 1  | 0.00745113 | 0.249113426 | 0.395616251 |
| cg00931957 | 1  | 0.00621251 | 0.583663194 | 0.730064001 |
| cg27219972 | 16 | 0.01160468 | 0.20221543  | 0.348600833 |
| cg02632742 | 2  | 0.02917469 | 0.5352      | 0.681558862 |

|            |    |            |             |             |
|------------|----|------------|-------------|-------------|
| cg13482375 | 17 | 0.00854462 | 0.198763874 | 0.345087786 |
| cg24335092 | 3  | 0.02173311 | 0.188214104 | 0.334527709 |
| cg15010140 | 2  | 0.00670264 | 0.493196304 | 0.639378275 |
| cg12418043 | 5  | 0.00571255 | 0.402917058 | 0.549052912 |
| cg25317631 | 11 | 0.00167449 | 0.189725184 | 0.335804366 |
| cg09571082 | 6  | 0.00183331 | 0.220692356 | 0.366705509 |
| cg05210480 | 7  | 0.00357456 | 0.28774805  | 0.433750692 |
| cg03474525 | 6  | 0.01749051 | 0.428525352 | 0.574514423 |
| cg10299610 | 8  | 0.00839953 | 0.523323269 | 0.669299782 |
| cg21034531 | 17 | 0.02624572 | 0.679848594 | 0.825742596 |
| cg07099073 | 6  | 0.01006342 | 0.666055173 | 0.811945854 |
| cg00632007 | 6  | 0.01037743 | 0.565047371 | 0.710899703 |
| cg16385029 | 1  | 0.03028616 | 0.150598322 | 0.296445537 |
| cg10338232 | 14 | 0.00833362 | 0.642281974 | 0.788040379 |
| cg26655004 | 13 | 0.00303036 | 0.703280635 | 0.848994836 |
| cg12977346 | 8  | 0.01656196 | 0.26267635  | 0.408375246 |
| cg11484721 | 15 | 0.00237678 | 0.294491334 | 0.44007545  |
| cg16675872 | 8  | 0.04508165 | 0.169110857 | 0.314689097 |
| cg27338109 | 16 | 7.01E-05   | 0.412078252 | 0.557635862 |
| cg25189681 | 8  | 0.00322539 | 0.244387875 | 0.389865269 |
| cg17466474 | 1  | 0.01268602 | 0.24225548  | 0.387680035 |
| cg25575845 | 7  | 0.01179961 | 0.452533995 | 0.597955905 |
| cg09697697 | 17 | 0.01272657 | 0.226891001 | 0.372308286 |
| cg09721423 | 6  | 0.03931981 | 0.481775514 | 0.62717063  |
| cg19994159 | 13 | 0.01110407 | 0.337020146 | 0.482377894 |
| cg24184919 | 3  | 0.02715485 | 0.156920333 | 0.302252788 |
| cg04239863 | 16 | 0.00550892 | 0.37344783  | 0.518704366 |
| cg06162751 | 12 | 0.0085982  | 0.1930624   | 0.338308443 |
| cg23623851 | 3  | 0.00126955 | 0.278252919 | 0.423451617 |
| cg12354056 | 3  | 0.00050351 | 0.423915997 | 0.569095071 |
| cg20062681 | 11 | 0.01409061 | 0.423220094 | 0.568298599 |
| cg14732815 | 6  | 0.01628553 | 0.20761121  | 0.352577791 |
| cg02263444 | 5  | 0.0025252  | 0.363256769 | 0.50821634  |
| cg14605447 | 9  | 0.00635244 | 0.138572057 | 0.283472471 |
| cg08608240 | 16 | 0.00313066 | 0.173752206 | 0.318601572 |
| cg05123755 | 7  | 0.02913871 | 0.70533377  | 0.850154563 |
| cg02656871 | 16 | 0.0003638  | 0.198722196 | 0.343524651 |
| cg26843278 | 10 | 0.00037656 | 0.449599358 | 0.594376324 |
| cg18516125 | 6  | 0.04501759 | 0.723462095 | 0.868234622 |
| cg10149870 | 2  | 0.04704869 | 0.201882518 | 0.346525961 |
| cg05184395 | 6  | 0.00331082 | 0.134135157 | 0.278737253 |
| cg14621350 | 12 | 0.02289938 | 0.569942216 | 0.714468573 |
| cg23819144 | 10 | 0.00112269 | 0.593390161 | 0.737910895 |
| cg16155923 | 6  | 0.00685233 | 0.373153708 | 0.517583423 |
| cg13476964 | 7  | 0.01238904 | 0.577283055 | 0.721647948 |
| cg19265546 | 7  | 0.00016884 | 0.558490543 | 0.702830005 |

|            |    |            |             |             |
|------------|----|------------|-------------|-------------|
| cg01369207 | 2  | 0.00149495 | 0.458250121 | 0.602546394 |
| cg03291548 | 22 | 0.01432635 | 0.382015696 | 0.526285356 |
| cg00017826 | 2  | 0.00457147 | 0.162571109 | 0.306816933 |
| cg18200075 | 1  | 0.00402566 | 0.350639435 | 0.494878952 |
| cg03760457 | 15 | 8.49E-05   | 0.18111854  | 0.325352563 |
| cg26097711 | 15 | 0.03425843 | 0.170398353 | 0.314611975 |
| cg05711023 | 3  | 0.01038465 | 0.638327049 | 0.782503484 |
| cg17270887 | 12 | 0.03643268 | 0.504214423 | 0.648332826 |
| cg04507945 | 1  | 0.0071726  | 0.685105681 | 0.829160719 |
| cg19988235 | 2  | 0.00401309 | 0.314246715 | 0.458281258 |
| cg11804725 | 3  | 0.01449728 | 0.100705171 | 0.244685191 |
| cg18648169 | 12 | 0.00014645 | 0.226092703 | 0.370068103 |
| cg06179152 | 16 | 0.00107005 | 0.159869705 | 0.303801483 |
| cg18682731 | 10 | 0.00610759 | 0.267304579 | 0.411151933 |
| cg17211890 | 10 | 0.02422915 | 0.632415301 | 0.776195468 |
| cg04848137 | 8  | 0.02658029 | 0.184099637 | 0.327843609 |
| cg21118819 | 1  | 0.00215713 | 0.244245238 | 0.387956296 |
| cg06925882 | 16 | 0.00011804 | 0.275873933 | 0.419539753 |
| cg03858917 | 11 | 0.0032554  | 0.146851451 | 0.290400599 |
| cg02490659 | 9  | 0.00191332 | 0.287835958 | 0.431176266 |
| cg26611650 | 16 | 0.00237671 | 0.415664861 | 0.558926309 |
| cg19298400 | 17 | 0.00343518 | 0.408742676 | 0.552002647 |
| cg19587537 | 15 | 0.02328567 | 0.548216485 | 0.691446286 |
| cg08046411 | 11 | 0.01493527 | 0.534236519 | 0.677454635 |
| cg21129181 | 5  | 0.00348344 | 0.20691826  | 0.350080666 |
| cg06597413 | 11 | 0.00459185 | 0.405359172 | 0.548501099 |
| cg02962647 | 6  | 0.00078633 | 0.447848772 | 0.59097446  |
| cg15084766 | 12 | 0.04497452 | 0.480369337 | 0.623406748 |
| cg03116409 | 12 | 0.01478644 | 0.389620534 | 0.532537134 |
| cg01905690 | 14 | 0.005274   | 0.199344782 | 0.342256785 |
| cg05783384 | 2  | 0.00266568 | 0.244424676 | 0.387324086 |
| cg22521263 | 4  | 0.00035687 | 0.268418388 | 0.411271192 |
| cg10626792 | 11 | 0.00485833 | 0.427893438 | 0.570739196 |
| cg13959014 | 9  | 0.00182694 | 0.626373996 | 0.769216641 |
| cg16106254 | 12 | 0.03243663 | 0.182245236 | 0.325048784 |
| cg23086519 | 14 | 0.00798914 | 0.17296841  | 0.315698022 |
| cg18121989 | 8  | 0.00596341 | 0.147165798 | 0.289738839 |
| cg05565697 | 15 | 0.0012987  | 0.46111693  | 0.603688563 |
| cg01021196 | 14 | 0.01100296 | 0.212095337 | 0.35463876  |
| cg04379409 | 6  | 0.00246746 | 0.667126788 | 0.809657461 |
| cg09560533 | 2  | 0.00437567 | 0.114189053 | 0.256701145 |
| cg18913924 | 7  | 0.00261321 | 0.454707912 | 0.597166043 |
| cg12228061 | 12 | 0.04907974 | 0.35975864  | 0.502204243 |
| cg23660866 | 14 | 0.00018977 | 0.243437621 | 0.385853429 |
| cg10492240 | 4  | 0.00230565 | 0.241759502 | 0.384173739 |
| cg05155038 | 5  | 0.00281272 | 0.522185061 | 0.66447919  |

|            |    |            |             |             |
|------------|----|------------|-------------|-------------|
| cg14779327 | 7  | 0.00302372 | 0.56600714  | 0.708253097 |
| cg07928883 | 7  | 0.01664179 | 0.314629891 | 0.45673679  |
| cg18745317 | 5  | 0.00821782 | 0.442422399 | 0.584359486 |
| cg08029969 | 16 | 0.00078041 | 0.307453766 | 0.449305638 |
| cg25367559 | 12 | 0.00263766 | 0.118371277 | 0.260184724 |
| cg06260709 | 20 | 0.00043164 | 0.204630524 | 0.346425568 |
| cg09937500 | 2  | 0.00790208 | 0.151287692 | 0.293011873 |
| cg02852847 | 1  | 0.00981543 | 0.568995249 | 0.710653209 |
| cg19888684 | 7  | 0.04735797 | 0.239709584 | 0.381314993 |
| cg12474686 | 10 | 0.00324413 | 0.627248896 | 0.768812753 |
| cg02574863 | 3  | 0.01803167 | 0.423585912 | 0.565140681 |
| cg26330928 | 1  | 0.02965826 | 0.311856274 | 0.453402521 |
| cg02243157 | 2  | 0.03034423 | 0.497668501 | 0.639169431 |
| cg21776813 | 3  | 0.00145594 | 0.23013667  | 0.37154952  |
| cg08301211 | 6  | 0.00591619 | 0.552252071 | 0.693664571 |
| cg11423680 | 5  | 0.00269344 | 0.154310099 | 0.295703898 |
| cg18774857 | 15 | 0.03310994 | 0.196078435 | 0.337424528 |
| cg18220365 | 1  | 0.01022347 | 0.486401476 | 0.627712791 |
| cg19891924 | 5  | 0.00144336 | 0.158701103 | 0.299921748 |
| cg23200818 | 12 | 0.00171238 | 0.239807344 | 0.381001562 |
| cg17500962 | 16 | 0.00063401 | 0.55301963  | 0.694188002 |
| cg20384325 | 15 | 0.0001657  | 0.574419817 | 0.715565054 |
| cg22607164 | 3  | 0.00104872 | 0.166512406 | 0.307507467 |
| cg15945475 | 11 | 0.00078633 | 0.351895736 | 0.492860316 |
| cg13406593 | 9  | 0.00408448 | 0.273753174 | 0.414683552 |
| cg08362283 | 16 | 0.00019673 | 0.183327533 | 0.324226545 |
| cg13750214 | 19 | 0.00018309 | 0.291659459 | 0.432511138 |
| cg21924472 | 4  | 0.00032559 | 0.457055236 | 0.597843286 |
| cg02683621 | 7  | 0.00104615 | 0.516232041 | 0.657007517 |
| cg27366617 | 18 | 0.00566325 | 0.229240032 | 0.369937782 |
| cg17479898 | 1  | 0.01065511 | 0.494008876 | 0.634675483 |
| cg25338818 | 18 | 0.00295703 | 0.488401168 | 0.629043461 |
| cg19546792 | 10 | 0.00017209 | 0.595958655 | 0.736533598 |
| cg14651504 | 13 | 0.01514474 | 0.136359408 | 0.27675983  |
| cg05352016 | 2  | 0.02735327 | 0.127965551 | 0.26834551  |
| cg13807254 | 9  | 0.01190904 | 0.175222064 | 0.315551759 |
| cg01824933 | 17 | 0.00746735 | 0.646236006 | 0.786414892 |
| cg22405226 | 6  | 0.02973686 | 0.135651764 | 0.275760524 |
| cg25889504 | 7  | 0.02618464 | 0.396190031 | 0.536151992 |
| cg15406343 | 17 | 0.00426458 | 0.486094538 | 0.626045838 |
| cg00163089 | 1  | 0.00243877 | 0.140009939 | 0.279942667 |
| cg19718563 | 19 | 0.00048329 | 0.293727139 | 0.433648133 |
| cg20878925 | 13 | 0.03455312 | 0.270171475 | 0.410008525 |
| cg16525974 | 16 | 0.00021379 | 0.628926606 | 0.768746402 |
| cg05765734 | 8  | 0.01142954 | 0.163253089 | 0.302927161 |
| cg18321762 | 8  | 0.02240523 | 0.415970626 | 0.555628624 |

|            |    |            |             |             |
|------------|----|------------|-------------|-------------|
| cg05081908 | 4  | 0.00151584 | 0.267836014 | 0.407486208 |
| cg22049902 | 6  | 0.01468008 | 0.659775654 | 0.799351789 |
| cg20824932 | 6  | 0.00718675 | 0.151814207 | 0.291343095 |
| cg13074572 | 7  | 0.00338219 | 0.548725291 | 0.688065419 |
| cg27327370 | 2  | 0.02258302 | 0.659306042 | 0.798638384 |
| cg01030598 | 13 | 0.0415679  | 0.19015609  | 0.329440131 |
| cg00881378 | 15 | 0.00204167 | 0.575816689 | 0.71498678  |
| cg10522535 | 11 | 0.04825637 | 0.445043013 | 0.584206083 |
| cg09692428 | 16 | 0.00116242 | 0.208937803 | 0.348078877 |
| cg19821872 | 2  | 0.00066484 | 0.572772221 | 0.71190677  |
| cg03558269 | 16 | 0.00410123 | 0.277345622 | 0.416410122 |
| cg06636220 | 3  | 0.00024762 | 0.543610418 | 0.682660602 |
| cg12391643 | 2  | 0.02566429 | 0.239197847 | 0.378230071 |
| cg05672223 | 2  | 0.00035334 | 0.307273822 | 0.446294083 |
| cg01391063 | 10 | 0.00134659 | 0.394839933 | 0.533858255 |
| cg24543939 | 5  | 0.04375784 | 0.150249492 | 0.289248212 |
| cg23322996 | 12 | 0.03886472 | 0.195822911 | 0.33478097  |
| cg24082799 | 12 | 0.02202689 | 0.359459137 | 0.498400737 |
| cg23612072 | 17 | 0.02657013 | 0.23603095  | 0.374896699 |
| cg26538335 | 12 | 0.00134748 | 0.391539426 | 0.530402474 |
| cg06259351 | 16 | 0.0056655  | 0.582424676 | 0.721229424 |
| cg03662049 | 2  | 0.00021343 | 0.202607282 | 0.341380662 |
| cg02054513 | 16 | 0.02047811 | 0.270985221 | 0.409708509 |
| cg20074526 | 3  | 0.02151433 | 0.168120337 | 0.306819228 |
| cg10888878 | 1  | 0.02793692 | 0.499719559 | 0.638383679 |
| cg04649852 | 16 | 0.00104872 | 0.248769663 | 0.38735337  |
| cg10316525 | 15 | 0.00341966 | 0.320500598 | 0.459083482 |
| cg14833024 | 12 | 0.018916   | 0.212776122 | 0.351275251 |
| cg05422883 | 2  | 0.00072365 | 0.529386784 | 0.667824721 |
| cg26976707 | 11 | 0.01017869 | 0.322149126 | 0.460576293 |
| cg26808738 | 4  | 0.00203942 | 0.725143307 | 0.86356437  |
| cg16927416 | 8  | 0.00012436 | 0.360681686 | 0.498995487 |
| cg25001102 | 1  | 0.00164009 | 0.448484353 | 0.586779121 |
| cg08959182 | 5  | 0.00326518 | 0.543809052 | 0.682090812 |
| cg03712403 | 12 | 0.0379412  | 0.373752207 | 0.51199609  |
| cg05279291 | 15 | 0.00244384 | 0.231009962 | 0.369252821 |
| cg25061027 | 14 | 0.01446983 | 0.528725098 | 0.66693769  |
| cg02553872 | 16 | 0.00753928 | 0.331009818 | 0.469199891 |
| cg13645530 | 12 | 0.00120397 | 0.16385642  | 0.301994399 |
| cg19513492 | 12 | 0.0046703  | 0.264445565 | 0.402441908 |
| cg17382879 | 13 | 0.00243364 | 0.534105435 | 0.672097538 |
| cg00832105 | 8  | 0.01794484 | 0.303732052 | 0.441568262 |
| cg24326075 | 8  | 0.0044466  | 0.592996804 | 0.730829069 |
| cg12083597 | 10 | 0.00046086 | 0.736479018 | 0.874262499 |
| cg12277870 | 1  | 0.01463948 | 0.296921466 | 0.434677358 |
| cg08879390 | 19 | 0.00387614 | 0.432266549 | 0.569989809 |

|            |    |            |             |             |
|------------|----|------------|-------------|-------------|
| cg01935436 | 7  | 0.01188395 | 0.152364229 | 0.290069048 |
| cg22004089 | 2  | 0.0004441  | 0.627956226 | 0.765626771 |
| cg02506275 | 12 | 0.04202309 | 0.479454868 | 0.617082697 |
| cg21474774 | 1  | 0.01688552 | 0.410309008 | 0.547870249 |
| cg06350882 | 7  | 0.00507519 | 0.500152612 | 0.637629091 |
| cg00209623 | 3  | 0.00017931 | 0.339134653 | 0.476481939 |
| cg26081974 | 13 | 0.00336408 | 0.209539761 | 0.346798507 |
| cg25214552 | 4  | 0.04033913 | 0.20330634  | 0.34055801  |
| cg14185860 | 2  | 0.02884525 | 0.173886999 | 0.311115197 |
| cg11607648 | 3  | 0.04962562 | 0.636925308 | 0.773971847 |
| cg01894366 | 3  | 0.02388202 | 0.158067606 | 0.295094075 |
| cg07023324 | 13 | 0.04600307 | 0.396335897 | 0.533318854 |
| cg02095697 | 2  | 0.02444909 | 0.309254875 | 0.446131095 |
| cg20149937 | 19 | 0.00389761 | 0.244743545 | 0.381603212 |
| cg13767779 | 17 | 0.00546039 | 0.457751462 | 0.59459798  |
| cg01194073 | 14 | 0.00084167 | 0.304946401 | 0.44175213  |
| cg09290893 | 17 | 0.01041379 | 0.271163143 | 0.407909882 |
| cg27145098 | 16 | 0.02129031 | 0.298991167 | 0.435694673 |
| cg10533060 | 16 | 0.00207283 | 0.6930875   | 0.829762812 |
| cg13212831 | 1  | 0.00679823 | 0.614686981 | 0.751284603 |
| cg18528696 | 12 | 0.01035148 | 0.359412647 | 0.495994573 |
| cg14223001 | 11 | 0.00143469 | 0.18399338  | 0.32057427  |
| cg09502809 | 1  | 0.0009106  | 0.490967166 | 0.627546591 |
| cg15629868 | 1  | 0.02453642 | 0.212307019 | 0.348870359 |
| cg13429168 | 9  | 0.00314371 | 0.299762965 | 0.43628561  |
| cg24221559 | 2  | 0.0462017  | 0.440881507 | 0.577380213 |
| cg19996406 | 8  | 0.016036   | 0.13754608  | 0.274014345 |
| cg00348891 | 13 | 0.00456312 | 0.218404793 | 0.354789604 |
| cg26389913 | 12 | 0.01995735 | 0.281288063 | 0.417528705 |
| cg00125005 | 7  | 0.02208663 | 0.167518157 | 0.303712891 |
| cg08349093 | 10 | 0.01504776 | 0.335284437 | 0.471446627 |
| cg05575777 | 3  | 0.04666968 | 0.277387773 | 0.413493713 |
| cg13136220 | 8  | 0.0003098  | 0.127105289 | 0.263179393 |
| cg19119609 | 20 | 0.00240818 | 0.123786155 | 0.259859859 |
| cg22251148 | 11 | 0.02944321 | 0.219056713 | 0.35504087  |
| cg11841288 | 1  | 0.02294416 | 0.55769614  | 0.693528212 |
| cg16976599 | 2  | 0.04217129 | 0.53016127  | 0.665985128 |
| cg03064626 | 2  | 0.02296568 | 0.118509788 | 0.254208198 |
| cg21661768 | 2  | 0.02045189 | 0.122589567 | 0.258202336 |
| cg02924972 | 13 | 0.02786663 | 0.572147322 | 0.707700828 |
| cg00637940 | 7  | 0.03739733 | 0.263539207 | 0.399005914 |
| cg10244770 | 12 | 0.03036977 | 0.45840584  | 0.593860591 |
| cg01566312 | 1  | 0.0333861  | 0.486209872 | 0.621498425 |
| cg22957360 | 10 | 0.00058122 | 0.191601883 | 0.32686737  |
| cg21686171 | 1  | 0.03000876 | 0.139486048 | 0.27469408  |
| cg04523661 | 19 | 0.01185734 | 0.140606571 | 0.27579517  |

|            |    |            |             |             |
|------------|----|------------|-------------|-------------|
| cg05797224 | 1  | 0.04038608 | 0.10536623  | 0.240493488 |
| cg09221960 | 11 | 0.00081752 | 0.516569235 | 0.651584874 |
| cg13460850 | 3  | 0.046593   | 0.257686029 | 0.392675605 |
| cg00925054 | 1  | 0.01311915 | 0.281349006 | 0.416263947 |
| cg23529856 | 13 | 0.00212219 | 0.413112028 | 0.547968168 |
| cg12905176 | 3  | 0.00176755 | 0.354893909 | 0.489717353 |
| cg05940514 | 17 | 0.01417898 | 0.255808795 | 0.39055713  |
| cg17855390 | 1  | 0.03035905 | 0.395542162 | 0.530276619 |
| cg24707486 | 14 | 0.00086501 | 0.485660633 | 0.620345214 |
| cg19958511 | 10 | 0.00959799 | 0.455221724 | 0.589889678 |
| cg19649152 | 13 | 0.03232589 | 0.371140182 | 0.505737119 |
| cg12441957 | 10 | 0.03356731 | 0.198023712 | 0.332605157 |
| cg06815361 | 8  | 0.00515905 | 0.469957822 | 0.604391084 |
| cg24709511 | 1  | 0.00027715 | 0.320694056 | 0.455110384 |
| cg02744699 | 17 | 0.00616862 | 0.709012252 | 0.843357068 |
| cg02411088 | 17 | 0.00512695 | 0.124746823 | 0.259051695 |
| cg00005740 | 13 | 0.0026907  | 0.368642702 | 0.502881609 |
| cg23012654 | 14 | 0.03071666 | 0.629543461 | 0.76374995  |
| cg01872122 | 5  | 0.00296178 | 0.226384156 | 0.360582025 |
| cg16686839 | 16 | 0.03755417 | 0.481461272 | 0.615644041 |
| cg05657096 | 16 | 0.02120843 | 0.546226049 | 0.680337294 |
| cg07889827 | 10 | 0.03103221 | 0.348874728 | 0.482844485 |
| cg26120971 | 8  | 0.02195607 | 0.237865444 | 0.371829417 |
| cg07675998 | 11 | 0.00197095 | 0.381763795 | 0.515720368 |
| cg04587617 | 17 | 0.00695634 | 0.196475236 | 0.33038208  |
| cg15203566 | 5  | 5.22E-05   | 0.251234514 | 0.385109288 |
| cg17430228 | 11 | 0.00269477 | 0.336415494 | 0.470234159 |
| cg04371567 | 4  | 0.00766434 | 0.432201145 | 0.565983687 |
| cg24366665 | 13 | 0.00580375 | 0.519402373 | 0.653142738 |
| cg05748238 | 16 | 0.00156854 | 0.447034961 | 0.580644847 |
| cg04147969 | 15 | 0.00385715 | 0.111883238 | 0.245330683 |
| cg06827015 | 3  | 0.01429009 | 0.22557122  | 0.358995735 |
| cg17388712 | 7  | 0.01134309 | 0.247309614 | 0.38060049  |
| cg13822561 | 6  | 0.01415612 | 0.651495699 | 0.78472728  |
| cg07568314 | 6  | 0.00040367 | 0.748423711 | 0.881643224 |
| cg13083032 | 7  | 0.00829356 | 0.303025359 | 0.436160376 |
| cg11806439 | 14 | 0.01256217 | 0.174179639 | 0.307301312 |
| cg01035869 | 6  | 0.04968184 | 0.682040223 | 0.815130654 |
| cg27638288 | 11 | 0.02573595 | 0.248042113 | 0.381125911 |
| cg05782966 | 2  | 0.0186838  | 0.564500324 | 0.697527224 |
| cg09115607 | 5  | 0.00806251 | 0.392467894 | 0.525459061 |
| cg15164702 | 10 | 0.00088822 | 0.217141569 | 0.350044035 |
| cg01408860 | 16 | 0.00099112 | 0.24291046  | 0.375764023 |
| cg22321267 | 7  | 0.00670547 | 0.377585397 | 0.510438653 |
| cg00131261 | 8  | 0.001026   | 0.743570942 | 0.876323285 |
| cg04232282 | 16 | 0.0300946  | 0.143520643 | 0.276270227 |



|            |    |            |             |             |
|------------|----|------------|-------------|-------------|
| cg17009813 | 14 | 0.01181492 | 0.289314905 | 0.42205492  |
| cg15578332 | 3  | 0.00814802 | 0.245122128 | 0.377842262 |
| cg01631064 | 15 | 0.01326152 | 0.128779606 | 0.261477173 |
| cg21897970 | 17 | 0.0040122  | 0.353467517 | 0.486072126 |
| cg17685004 | 2  | 0.04971966 | 0.196780596 | 0.329269035 |
| cg26942432 | 15 | 0.00099477 | 0.152395018 | 0.284837959 |
| cg14524724 | 5  | 0.00376371 | 0.160229397 | 0.292633781 |
| cg20886660 | 13 | 0.01301786 | 0.522296587 | 0.654699569 |
| cg21072457 | 5  | 0.00303065 | 0.571547082 | 0.703930194 |
| cg18817970 | 3  | 0.03825075 | 0.125709252 | 0.258064906 |
| cg08200420 | 2  | 0.00080013 | 0.386377872 | 0.518727742 |
| cg01511234 | 12 | 0.03357992 | 0.190438176 | 0.322727598 |
| cg20821566 | 17 | 0.00267102 | 0.121654757 | 0.253944115 |
| cg07311419 | 11 | 0.03658383 | 0.194830395 | 0.32709023  |
| cg08903939 | 16 | 0.00555981 | 0.565017963 | 0.697261822 |
| cg13513907 | 12 | 0.02777176 | 0.478533932 | 0.6107713   |
| cg07040768 | 16 | 0.00814228 | 0.159653746 | 0.291869805 |
| cg22593432 | 13 | 0.02461853 | 0.163223227 | 0.295415065 |
| cg00929496 | 6  | 0.02548284 | 0.462139072 | 0.594299669 |
| cg24006667 | 7  | 0.04594257 | 0.298332818 | 0.430191226 |
| cg10224806 | 12 | 0.00217777 | 0.583295616 | 0.715112596 |
| cg15226808 | 6  | 0.02033986 | 0.598465926 | 0.730256203 |
| cg17547577 | 3  | 0.00303851 | 0.683912054 | 0.815674722 |
| cg09426420 | 7  | 0.02581494 | 0.536833046 | 0.668558721 |
| cg03753942 | 8  | 0.01995772 | 0.383447678 | 0.515144575 |
| cg19049754 | 10 | 0.00023686 | 0.304160333 | 0.435822803 |
| cg10989214 | 3  | 0.01334818 | 0.278192872 | 0.40984458  |
| cg03526459 | 1  | 0.03128625 | 0.120838599 | 0.252474413 |
| cg23291376 | 2  | 0.04243228 | 0.484552691 | 0.616147741 |
| cg19153828 | 2  | 0.00030201 | 0.16560957  | 0.297162862 |
| cg07347205 | 16 | 0.01191327 | 0.23604578  | 0.367552879 |
| cg26333454 | 14 | 0.01236658 | 0.161978296 | 0.293437386 |
| cg01253386 | 10 | 0.02522428 | 0.301060213 | 0.432508189 |
| cg10985970 | 11 | 0.00140084 | 0.581996813 | 0.713425524 |
| cg04213390 | 2  | 0.00854671 | 0.202848067 | 0.334235947 |
| cg08886020 | 16 | 0.00643593 | 0.215594348 | 0.346960091 |
| cg09695851 | 17 | 0.00168146 | 0.345481588 | 0.476816903 |
| cg02859421 | 19 | 0.00545547 | 0.321496389 | 0.45279769  |
| cg11113066 | 10 | 0.0015398  | 0.311684781 | 0.442932174 |
| cg22711009 | 10 | 0.04714621 | 0.240796354 | 0.371951889 |
| cg26987928 | 15 | 0.00404496 | 0.615527478 | 0.746656625 |
| cg24665368 | 8  | 0.00214382 | 0.666689998 | 0.79776297  |
| cg22462726 | 3  | 0.00015596 | 0.302688518 | 0.433700436 |
| cg02525719 | 4  | 0.03034375 | 0.367154547 | 0.498156885 |
| cg22300615 | 20 | 0.03815941 | 0.373812425 | 0.504682813 |
| cg20637688 | 12 | 0.01731847 | 0.499785908 | 0.63059206  |

|            |    |            |             |             |
|------------|----|------------|-------------|-------------|
| cg08452095 | 3  | 0.01804264 | 0.523047828 | 0.653791667 |
| cg03584351 | 7  | 0.02385795 | 0.307383724 | 0.438105092 |
| cg21393885 | 17 | 0.02753706 | 0.57739429  | 0.707997313 |
| cg20462100 | 1  | 0.00212384 | 0.524237637 | 0.654825494 |
| cg23895439 | 1  | 0.04421923 | 0.234398297 | 0.364973816 |
| cg25045013 | 15 | 0.00311965 | 0.548667253 | 0.679175112 |
| cg13463465 | 2  | 0.01017869 | 0.384956562 | 0.515460776 |
| cg25831071 | 11 | 0.010042   | 0.298778457 | 0.429180824 |
| cg11045529 | 20 | 0.04426878 | 0.278866817 | 0.409211611 |
| cg06073695 | 6  | 0.00056381 | 0.381147741 | 0.511491256 |
| cg05905731 | 16 | 0.00014048 | 0.396674219 | 0.526985021 |
| cg07849237 | 17 | 0.00987483 | 0.640239181 | 0.770475701 |
| cg01552748 | 13 | 0.00095015 | 0.594316244 | 0.724531516 |
| cg02116942 | 2  | 0.04373792 | 0.114879097 | 0.245080366 |
| cg12130672 | 17 | 0.01702777 | 0.27807323  | 0.408271034 |
| cg15126897 | 1  | 0.03558389 | 0.716058137 | 0.846212313 |
| cg23070380 | 6  | 0.00999619 | 0.216150352 | 0.34618918  |
| cg19885001 | 13 | 0.04353723 | 0.495301361 | 0.625305171 |
| cg11202634 | 8  | 0.0036888  | 0.427903793 | 0.557860777 |
| cg06256007 | 11 | 0.02023468 | 0.198698186 | 0.328650081 |
| cg23180941 | 5  | 0.00453021 | 0.692399443 | 0.822329343 |
| cg03389982 | 1  | 0.00800911 | 0.339878172 | 0.469707624 |
| cg02645287 | 16 | 9.04E-05   | 0.506008517 | 0.635803851 |
| cg17342469 | 22 | 0.00686543 | 0.149605534 | 0.2793372   |
| cg01325552 | 4  | 0.04893011 | 0.603775851 | 0.733462518 |
| cg12127048 | 1  | 0.00823479 | 0.399310443 | 0.52896449  |
| cg07537530 | 13 | 0.04636494 | 0.158148743 | 0.28776781  |
| cg02514143 | 5  | 0.01280905 | 0.450578654 | 0.580194566 |
| cg24998791 | 8  | 0.00537874 | 0.207399291 | 0.336998827 |
| cg23879937 | 4  | 0.00484418 | 0.359974637 | 0.489544376 |
| cg03598731 | 8  | 0.00281587 | 0.259396845 | 0.388961297 |
| cg01245224 | 11 | 0.04666968 | 0.431817865 | 0.561377441 |
| cg24075175 | 11 | 0.00189386 | 0.234306307 | 0.363855699 |
| cg21903122 | 14 | 0.04294945 | 0.174982419 | 0.304514943 |
| cg10930901 | 5  | 0.04417543 | 0.387869762 | 0.517370543 |
| cg15129052 | 1  | 0.01022961 | 0.188207486 | 0.317597238 |
| cg18815957 | 11 | 0.0445562  | 0.554461365 | 0.683842579 |
| cg03370330 | 2  | 0.00191967 | 0.334780955 | 0.464108824 |
| cg18469813 | 6  | 0.01590684 | 0.400082773 | 0.529370237 |
| cg21679391 | 1  | 0.0154877  | 0.152751935 | 0.282038462 |
| cg00685614 | 16 | 0.00029129 | 0.190897448 | 0.320157151 |
| cg14508405 | 2  | 0.00735211 | 0.317890571 | 0.447102186 |
| cg13215995 | 17 | 0.00029033 | 0.231141711 | 0.360280417 |
| cg23096806 | 10 | 0.03930103 | 0.300086432 | 0.429209789 |
| cg00349608 | 17 | 0.00080274 | 0.412372273 | 0.541493179 |
| cg04170948 | 16 | 0.04824442 | 0.348617623 | 0.477597926 |

|            |    |            |             |             |
|------------|----|------------|-------------|-------------|
| cg25815440 | 2  | 0.01316795 | 0.619129177 | 0.748088105 |
| cg11442259 | 10 | 0.02747938 | 0.667729357 | 0.796487203 |
| cg02805052 | 2  | 0.01086195 | 0.678752384 | 0.807423437 |
| cg18812629 | 1  | 0.03380057 | 0.600304827 | 0.728873957 |
| cg08392142 | 13 | 0.01025026 | 0.265970512 | 0.394444284 |
| cg27421117 | 2  | 0.00518839 | 0.535397365 | 0.663847887 |
| cg05315633 | 6  | 0.04795777 | 0.160396591 | 0.288816186 |
| cg00402352 | 11 | 0.00871022 | 0.433867111 | 0.562272378 |
| cg02792168 | 10 | 0.00181276 | 0.173752822 | 0.302029765 |
| cg16627836 | 2  | 0.02414858 | 0.291865284 | 0.420131865 |
| cg15526213 | 10 | 0.0034078  | 0.463853625 | 0.592091484 |
| cg03388247 | 2  | 0.00033508 | 0.566637839 | 0.69486644  |
| cg06711873 | 19 | 0.00401483 | 0.135017911 | 0.263237963 |
| cg07571379 | 11 | 0.04856034 | 0.327540967 | 0.455744874 |
| cg12626957 | 3  | 0.00283316 | 0.107282534 | 0.235417069 |
| cg26866349 | 16 | 0.00568088 | 0.692570413 | 0.820675404 |
| cg18097872 | 2  | 0.00146884 | 0.358680443 | 0.48657588  |
| cg07628073 | 19 | 0.00023669 | 0.606981642 | 0.734835937 |
| cg08486065 | 19 | 0.00293974 | 0.578574843 | 0.706360337 |
| cg15254822 | 7  | 0.04431403 | 0.457046188 | 0.584695922 |
| cg10607454 | 7  | 0.00075604 | 0.328403921 | 0.455950625 |
| cg02148562 | 8  | 0.00951431 | 0.192476065 | 0.320011498 |
| cg20594961 | 4  | 0.00019707 | 0.305711664 | 0.433245431 |
| cg18308339 | 5  | 0.00565723 | 0.516465609 | 0.643896601 |
| cg04935436 | 20 | 0.00782727 | 0.193707734 | 0.321092609 |
| cg06951265 | 10 | 0.04703688 | 0.449465673 | 0.576816645 |
| cg14145524 | 9  | 0.00034583 | 0.213101237 | 0.340315179 |
| cg14267222 | 10 | 0.02367738 | 0.20369437  | 0.330904201 |
| cg19577365 | 14 | 0.00293974 | 0.374462915 | 0.501622891 |
| cg00532399 | 5  | 0.01778595 | 0.379488281 | 0.506625123 |
| cg19910940 | 1  | 0.00896799 | 0.346799983 | 0.473936008 |
| cg18564849 | 1  | 0.01248341 | 0.232293442 | 0.359405431 |
| cg25453677 | 17 | 0.00349705 | 0.182995225 | 0.309973862 |
| cg23712401 | 10 | 0.00151429 | 0.188178492 | 0.315141942 |
| cg00096418 | 16 | 0.01124763 | 0.129408617 | 0.256291242 |
| cg21430752 | 17 | 0.01239509 | 0.597345813 | 0.724215643 |
| cg24078875 | 5  | 0.00360069 | 0.739736661 | 0.866577103 |
| cg00830419 | 2  | 0.00861856 | 0.653762203 | 0.780596915 |
| cg01655158 | 8  | 0.00957015 | 0.600874723 | 0.727641827 |
| cg02203714 | 16 | 0.00580754 | 0.469740805 | 0.596405929 |
| cg22122342 | 13 | 0.02362926 | 0.692109557 | 0.818747244 |
| cg07645809 | 6  | 0.03034423 | 0.577356226 | 0.703883566 |
| cg11256956 | 12 | 0.04661028 | 0.279226571 | 0.405688232 |
| cg23786812 | 7  | 0.04841698 | 0.522762846 | 0.649206373 |
| cg00400827 | 16 | 0.00070365 | 0.187541366 | 0.313957629 |
| cg12378321 | 15 | 0.02748848 | 0.614126555 | 0.740541708 |

|            |    |            |             |             |
|------------|----|------------|-------------|-------------|
| cg18662365 | 3  | 0.01453597 | 0.692069011 | 0.818456227 |
| cg16101804 | 2  | 0.02542233 | 0.650060866 | 0.776423739 |
| cg20674007 | 12 | 0.02411762 | 0.193155325 | 0.319459937 |
| cg05295696 | 4  | 0.00256565 | 0.603710969 | 0.730011432 |
| cg07115848 | 7  | 0.03573059 | 0.63125632  | 0.757540042 |
| cg12311651 | 15 | 0.04420001 | 0.375736761 | 0.50198734  |
| cg26509250 | 2  | 0.04556772 | 0.50928319  | 0.635422236 |
| cg16278514 | 3  | 0.00394117 | 0.338812739 | 0.464932464 |
| cg10228981 | 16 | 0.00068434 | 0.62524914  | 0.751264846 |
| cg07356338 | 16 | 0.00280358 | 0.371632926 | 0.497552095 |
| cg05006473 | 4  | 0.00139778 | 0.251318901 | 0.377236989 |
| cg20722637 | 2  | 0.00067775 | 0.72861731  | 0.854475081 |
| cg12741293 | 7  | 0.03097797 | 0.125266172 | 0.251079948 |
| cg11843673 | 2  | 0.01425257 | 0.604874009 | 0.730674214 |
| cg24902196 | 2  | 0.00931234 | 0.292934205 | 0.418718189 |
| cg09225701 | 4  | 0.01558075 | 0.542078726 | 0.667839157 |
| cg02621030 | 16 | 0.0443671  | 0.684796306 | 0.810546442 |
| cg08321483 | 4  | 0.01528287 | 0.305068907 | 0.43073531  |
| cg09907439 | 12 | 0.01329975 | 0.365394993 | 0.49100453  |
| cg05832925 | 11 | 0.00376303 | 0.651797116 | 0.777397217 |
| cg01168833 | 12 | 0.00254153 | 0.278027786 | 0.403620909 |
| cg16926213 | 1  | 0.00033097 | 0.228846797 | 0.354429482 |
| cg10924875 | 8  | 0.00262429 | 0.222447594 | 0.348024388 |
| cg01231009 | 8  | 0.00789781 | 0.59302516  | 0.718542246 |
| cg27143695 | 17 | 0.00582532 | 0.641369068 | 0.766876329 |
| cg20342432 | 2  | 0.0159821  | 0.492783721 | 0.618290665 |
| cg11863899 | 5  | 0.02942304 | 0.136024488 | 0.261449885 |
| cg11301695 | 12 | 0.00459185 | 0.203896075 | 0.329229967 |
| cg04556550 | 7  | 0.00966407 | 0.185032142 | 0.310360003 |
| cg09077862 | 5  | 0.03578766 | 0.219089518 | 0.344397331 |
| cg15139304 | 1  | 0.00165962 | 0.257949092 | 0.383121138 |
| cg06993255 | 8  | 0.00742167 | 0.295573729 | 0.420721024 |
| cg15513657 | 14 | 0.04392039 | 0.115020213 | 0.240156422 |
| cg14338246 | 17 | 0.00225347 | 0.588889122 | 0.713892409 |
| cg00268330 | 8  | 0.0383453  | 0.336651112 | 0.461637417 |
| cg04319990 | 10 | 0.00193304 | 0.423591992 | 0.548575227 |
| cg13445953 | 13 | 0.01983824 | 0.624680859 | 0.749573874 |
| cg07937999 | 14 | 0.0005198  | 0.790637658 | 0.915501612 |
| cg12646386 | 1  | 0.03212534 | 0.469650514 | 0.594469357 |
| cg00978505 | 1  | 0.00694352 | 0.526524677 | 0.651292691 |
| cg05562828 | 17 | 0.03062995 | 0.275529855 | 0.400273522 |
| cg21875839 | 2  | 0.01772981 | 0.581555397 | 0.706241459 |
| cg08513626 | 16 | 0.00663519 | 0.173875219 | 0.298555917 |
| cg12784272 | 17 | 0.0120954  | 0.249124172 | 0.373749992 |
| cg03396664 | 16 | 0.00110317 | 0.380893435 | 0.505513448 |
| cg04218880 | 1  | 0.00462813 | 0.253412364 | 0.377985701 |

|            |    |            |             |             |
|------------|----|------------|-------------|-------------|
| cg17431023 | 7  | 0.00511099 | 0.275485681 | 0.400009367 |
| cg26866452 | 15 | 0.02246377 | 0.226863992 | 0.351309609 |
| cg10836509 | 1  | 0.02427223 | 0.294364347 | 0.418809437 |
| cg01400830 | 11 | 0.00876577 | 0.580898282 | 0.705323256 |
| cg15247974 | 19 | 9.29E-05   | 0.53396924  | 0.658338249 |
| cg03923640 | 16 | 0.00349705 | 0.195753965 | 0.3201196   |
| cg17139283 | 1  | 0.00900175 | 0.718417839 | 0.842770939 |
| cg23682310 | 2  | 0.01970184 | 0.343230223 | 0.467559757 |
| cg16474583 | 4  | 0.00212315 | 0.77603817  | 0.900318054 |
| cg02197669 | 16 | 0.02396861 | 0.502339945 | 0.626617641 |
| cg06212297 | 16 | 0.03004514 | 0.554456454 | 0.678710937 |
| cg03086006 | 1  | 0.04161494 | 0.749773611 | 0.873966696 |
| cg05970547 | 4  | 0.04784964 | 0.65935996  | 0.783552527 |
| cg20593826 | 1  | 0.00074185 | 0.239901625 | 0.364046561 |
| cg24489344 | 22 | 0.00135716 | 0.367448455 | 0.491563915 |
| cg07782924 | 1  | 0.00107722 | 0.783701718 | 0.907754696 |
| cg06192592 | 6  | 0.01724144 | 0.244351664 | 0.368307905 |
| cg03222374 | 4  | 0.00028279 | 0.279800308 | 0.403699736 |
| cg22772386 | 6  | 0.0344661  | 0.309117372 | 0.433015229 |
| cg10804656 | 10 | 0.00021029 | 0.154382867 | 0.278274064 |
| cg03428314 | 16 | 0.00132552 | 0.25020071  | 0.374084309 |
| cg17263013 | 2  | 0.01848878 | 0.376236391 | 0.500101939 |
| cg10441034 | 2  | 0.01815941 | 0.594673485 | 0.718477305 |
| cg01774019 | 4  | 0.007957   | 0.356578811 | 0.480344647 |
| cg18986956 | 2  | 0.00052049 | 0.48586005  | 0.609598102 |
| cg18672053 | 5  | 0.02728166 | 0.485318347 | 0.609014216 |
| cg02142995 | 8  | 0.00078633 | 0.165883317 | 0.289543072 |
| cg22551145 | 15 | 0.00184544 | 0.178554552 | 0.30217081  |
| cg07301061 | 12 | 0.00652522 | 0.636245071 | 0.759850926 |
| cg12444822 | 1  | 0.00184002 | 0.582133396 | 0.705712051 |
| cg02516234 | 12 | 0.00133684 | 0.69309042  | 0.816640901 |
| cg01152374 | 15 | 0.01767748 | 0.180877757 | 0.304425904 |
| cg10122103 | 6  | 0.00042068 | 0.24730485  | 0.370797969 |
| cg17100047 | 10 | 0.00042158 | 0.157735118 | 0.281151409 |
| cg14299572 | 10 | 0.00012062 | 0.1833679   | 0.306701573 |
| cg04495313 | 4  | 0.00202996 | 0.217943455 | 0.341258544 |
| cg26197530 | 1  | 0.0401848  | 0.179608591 | 0.302916747 |
| cg03504160 | 4  | 0.01592981 | 0.462871669 | 0.586131534 |
| cg14502818 | 4  | 0.00957931 | 0.159539794 | 0.282785321 |
| cg06657240 | 18 | 0.00045498 | 0.525355733 | 0.648600889 |
| cg25303436 | 1  | 0.01807474 | 0.717034013 | 0.840267325 |
| cg11738198 | 1  | 0.04696515 | 0.224264572 | 0.347490947 |
| cg01052276 | 2  | 0.04111211 | 0.535895049 | 0.659076785 |
| cg00061635 | 17 | 0.01113186 | 0.201830187 | 0.325001913 |
| cg22163280 | 17 | 0.00835832 | 0.168263413 | 0.291427291 |
| cg00834923 | 16 | 0.00942603 | 0.24833323  | 0.371492737 |

|            |    |            |             |             |
|------------|----|------------|-------------|-------------|
| cg21106695 | 14 | 0.03588673 | 0.612254787 | 0.735401603 |
| cg05593669 | 12 | 0.04832005 | 0.500408527 | 0.623369904 |
| cg11782714 | 14 | 0.00035151 | 0.244441588 | 0.367294722 |
| cg26166433 | 15 | 0.00237814 | 0.270697324 | 0.393442147 |
| cg09494379 | 2  | 0.0029884  | 0.293442705 | 0.416177922 |
| cg00618626 | 17 | 0.00032767 | 0.407082799 | 0.52971813  |
| cg04293770 | 5  | 0.02330587 | 0.601742009 | 0.724355583 |
| cg04847478 | 10 | 0.00117245 | 0.650082782 | 0.772655488 |
| cg18384893 | 17 | 0.02784199 | 0.514873713 | 0.637440518 |
| cg06990142 | 8  | 0.00670337 | 0.663153938 | 0.785712495 |
| cg11119275 | 5  | 0.00093863 | 0.681723978 | 0.804254053 |
| cg05400883 | 1  | 0.00520344 | 0.73021498  | 0.852714948 |
| cg07292773 | 6  | 0.00031987 | 0.165568657 | 0.288057508 |
| cg10276948 | 8  | 0.0037002  | 0.429850691 | 0.552270621 |
| cg10431652 | 10 | 0.00534574 | 0.306556785 | 0.428968914 |
| cg14402385 | 9  | 0.00207244 | 0.233546543 | 0.35586217  |
| cg05215056 | 10 | 0.01319993 | 0.410141735 | 0.532435648 |
| cg06167221 | 18 | 0.00237678 | 0.403239857 | 0.5254907   |
| cg20366218 | 2  | 0.03093169 | 0.511332129 | 0.633578774 |
| cg18631996 | 5  | 0.00173265 | 0.268005307 | 0.390202364 |
| cg27422311 | 12 | 0.02779435 | 0.107807064 | 0.229974994 |
| cg23012917 | 1  | 0.03652443 | 0.401651604 | 0.523707153 |
| cg15730491 | 1  | 6.37E-05   | 0.152682927 | 0.274722771 |
| cg23899147 | 6  | 0.02782799 | 0.202841912 | 0.32482283  |
| cg14441787 | 8  | 0.01217745 | 0.779964496 | 0.901914135 |
| cg20430104 | 7  | 0.0149662  | 0.475296941 | 0.597176623 |
| cg02019528 | 14 | 0.0164714  | 0.630653603 | 0.752504132 |
| cg08135406 | 3  | 0.00042267 | 0.136456996 | 0.258304035 |
| cg01942797 | 7  | 0.00707069 | 0.222453894 | 0.344262678 |
| cg25568114 | 2  | 0.00042068 | 0.323522839 | 0.445220993 |
| cg18229092 | 2  | 0.00338585 | 0.650900907 | 0.772511085 |
| cg00305740 | 7  | 0.00575344 | 0.340141447 | 0.461737836 |
| cg03703733 | 6  | 0.03637048 | 0.55080217  | 0.672373567 |
| cg19667811 | 10 | 0.0244247  | 0.086861545 | 0.208421871 |
| cg14196998 | 20 | 0.02277637 | 0.355266152 | 0.476822081 |
| cg01817364 | 5  | 0.01125706 | 0.326695904 | 0.44817414  |
| cg09743615 | 11 | 0.00220131 | 0.616912858 | 0.738359622 |
| cg15755154 | 18 | 0.02767487 | 0.490327845 | 0.61175956  |
| cg01719663 | 4  | 0.01397733 | 0.481206628 | 0.602634518 |
| cg06664775 | 19 | 0.01189457 | 0.505075951 | 0.626376186 |
| cg20479009 | 6  | 0.01550118 | 0.564236311 | 0.685530354 |
| cg22912997 | 12 | 0.00385022 | 0.242375136 | 0.363618773 |
| cg21748138 | 2  | 0.00139922 | 0.52565561  | 0.646861606 |
| cg19812432 | 17 | 0.02281455 | 0.119935952 | 0.241140438 |
| cg04636307 | 16 | 0.01562102 | 0.40607058  | 0.527257962 |
| cg23630659 | 8  | 0.00482289 | 0.648269172 | 0.769353784 |

|            |    |            |             |             |
|------------|----|------------|-------------|-------------|
| cg12569007 | 10 | 0.02767717 | 0.145826568 | 0.266870489 |
| cg23904955 | 10 | 0.00274556 | 0.186455742 | 0.30748702  |
| cg21392435 | 8  | 0.00287222 | 0.339684813 | 0.460690492 |
| cg27416412 | 4  | 0.00232079 | 0.570229485 | 0.69113856  |
| cg11846355 | 12 | 0.00052374 | 0.603521866 | 0.724422704 |
| cg08779649 | 13 | 0.03944874 | 0.537955426 | 0.65876611  |
| cg09039112 | 16 | 0.0049889  | 0.688041473 | 0.808844071 |
| cg02622251 | 1  | 0.02846629 | 0.176601427 | 0.297386548 |
| cg14909198 | 13 | 0.04009358 | 0.329880771 | 0.450590953 |
| cg16681349 | 17 | 0.00452709 | 0.499061053 | 0.619766131 |
| cg09642740 | 8  | 0.00084827 | 0.398094418 | 0.518799037 |
| cg16298612 | 12 | 0.00509171 | 0.585723353 | 0.706396982 |
| cg01034811 | 8  | 0.03021605 | 0.550030535 | 0.670631745 |
| cg10232198 | 1  | 0.01011607 | 0.688651606 | 0.809245981 |
| cg05872570 | 10 | 0.00191885 | 0.680150377 | 0.800736484 |
| cg04640975 | 19 | 0.02182677 | 0.121669813 | 0.242243626 |
| cg08637446 | 11 | 0.00022396 | 0.457045286 | 0.577554739 |
| cg19333739 | 7  | 0.0245561  | 0.687520454 | 0.808011558 |
| cg26632875 | 12 | 0.01968886 | 0.122357957 | 0.242789198 |
| cg11807040 | 13 | 0.01581581 | 0.454559285 | 0.574955658 |
| cg09531729 | 16 | 0.00114323 | 0.280608508 | 0.400974277 |
| cg00465247 | 13 | 0.03941796 | 0.345366258 | 0.465729164 |
| cg18829443 | 2  | 0.02377121 | 0.461251872 | 0.581588598 |
| cg18607127 | 5  | 0.00266459 | 0.429851802 | 0.550172264 |
| cg09203057 | 19 | 0.02432882 | 0.665443009 | 0.785741107 |
| cg14658300 | 5  | 0.00408945 | 0.590403527 | 0.710687582 |
| cg08006672 | 16 | 0.00377233 | 0.619179753 | 0.739401347 |
| cg23314826 | 8  | 0.00595697 | 0.630408659 | 0.750618672 |
| cg00923996 | 3  | 0.01947387 | 0.185405542 | 0.305605502 |
| cg23606162 | 1  | 0.04777803 | 0.576313547 | 0.696511562 |
| cg13939055 | 1  | 0.00147055 | 0.162559726 | 0.282741859 |
| cg01292856 | 11 | 0.00111041 | 0.595231987 | 0.71536528  |
| cg22542685 | 17 | 0.02384257 | 0.640942604 | 0.761056918 |
| cg17342709 | 2  | 0.00121732 | 0.682994755 | 0.803077212 |
| cg17590003 | 17 | 0.0024546  | 0.224923839 | 0.344979661 |
| cg13750219 | 2  | 0.00851549 | 0.581450625 | 0.701498975 |
| cg14619716 | 11 | 0.01015529 | 0.535514427 | 0.655437476 |
| cg11599887 | 5  | 0.00374113 | 0.617793975 | 0.737638953 |
| cg01944810 | 2  | 0.00099737 | 0.627481462 | 0.747324734 |
| cg13917273 | 9  | 0.00071334 | 0.149959735 | 0.269753921 |
| cg10020890 | 16 | 0.01576039 | 0.448438191 | 0.568223667 |
| cg23856536 | 7  | 0.01421099 | 0.134795015 | 0.25455697  |
| cg10618461 | 12 | 0.02450522 | 0.669419609 | 0.78909691  |
| cg18011188 | 2  | 0.04099899 | 0.465584932 | 0.58524993  |
| cg25417675 | 6  | 0.0062149  | 0.185233608 | 0.304873884 |
| cg26014739 | 2  | 0.02712832 | 0.10999528  | 0.229606479 |

|            |    |            |             |             |
|------------|----|------------|-------------|-------------|
| cg26068090 | 13 | 0.02636183 | 0.455003814 | 0.574566143 |
| cg14676272 | 8  | 0.00850956 | 0.449336858 | 0.568853654 |
| cg05617678 | 15 | 0.03006064 | 0.119476344 | 0.238990609 |
| cg16201418 | 4  | 0.03781117 | 0.672155291 | 0.791667334 |
| cg01897156 | 16 | 0.00046135 | 0.321333857 | 0.440836023 |
| cg13224852 | 2  | 0.00183826 | 0.285266634 | 0.404753914 |
| cg05824809 | 16 | 0.02649769 | 0.299606162 | 0.419075922 |
| cg02264079 | 16 | 0.0009666  | 0.357666408 | 0.477117403 |
| cg18590119 | 6  | 0.02749888 | 0.567732856 | 0.687167274 |
| cg16361757 | 16 | 0.03363389 | 0.499912897 | 0.619336458 |
| cg08900511 | 1  | 0.0207408  | 0.268370624 | 0.387782728 |
| cg00786761 | 3  | 0.00096211 | 0.352685527 | 0.472093706 |
| cg18095938 | 5  | 0.01135012 | 0.644653288 | 0.764016132 |
| cg09894814 | 1  | 0.00242298 | 0.673260819 | 0.792579276 |
| cg11642211 | 18 | 0.01630475 | 0.491910052 | 0.611191983 |
| cg23597271 | 2  | 0.0096097  | 0.582659253 | 0.701938789 |
| cg16800228 | 15 | 0.02167002 | 0.680530763 | 0.799804321 |
| cg03727169 | 10 | 0.00049636 | 0.311345987 | 0.430612712 |
| cg08279879 | 17 | 0.00904863 | 0.373447345 | 0.492684427 |
| cg03577128 | 3  | 0.02449441 | 0.600697348 | 0.719927999 |
| cg00750630 | 14 | 0.02210502 | 0.563899478 | 0.683044895 |
| cg26231794 | 1  | 0.02324227 | 0.187295517 | 0.306436457 |
| cg07704235 | 18 | 0.00679766 | 0.657529177 | 0.776618012 |
| cg26107754 | 3  | 0.03886472 | 0.199066102 | 0.318132004 |
| cg09313445 | 14 | 0.0033967  | 0.295764736 | 0.414827223 |
| cg01414572 | 12 | 0.00095528 | 0.49385011  | 0.612904697 |
| cg26541649 | 1  | 0.00257034 | 0.225094576 | 0.344010563 |
| cg00934299 | 16 | 0.00181891 | 0.454628284 | 0.573458138 |
| cg06443678 | 17 | 0.00450524 | 0.532637936 | 0.651457369 |
| cg04308882 | 22 | 0.00177914 | 0.557209734 | 0.67596939  |
| cg03991106 | 15 | 0.00115272 | 0.456725937 | 0.57541164  |
| cg25351353 | 12 | 0.00933698 | 0.439931631 | 0.55854895  |
| cg09139491 | 13 | 0.04433393 | 0.476610842 | 0.595186183 |
| cg19993680 | 10 | 0.04674998 | 0.272732696 | 0.391304328 |
| cg04833853 | 11 | 0.01033615 | 0.720898546 | 0.839404925 |
| cg15851389 | 15 | 0.00425472 | 0.6446649   | 0.763144758 |
| cg21663666 | 2  | 0.00393479 | 0.214438071 | 0.332879221 |
| cg27451531 | 1  | 0.00466407 | 0.666047974 | 0.784457015 |
| cg12087123 | 17 | 0.0103469  | 0.502352375 | 0.620757066 |
| cg01205299 | 6  | 0.01699125 | 0.510166657 | 0.6285596   |
| cg01296347 | 2  | 0.02621259 | 0.16381123  | 0.282159616 |
| cg06708789 | 16 | 0.04607274 | 0.323370112 | 0.441716808 |
| cg07241917 | 1  | 0.00204167 | 0.369595913 | 0.48786261  |
| cg04004158 | 16 | 0.02851406 | 0.152931545 | 0.271190957 |
| cg18772231 | 12 | 0.00228008 | 0.550496894 | 0.668729604 |
| cg09513416 | 6  | 0.00231025 | 0.66837054  | 0.786544309 |



|            |    |            |             |             |
|------------|----|------------|-------------|-------------|
| cg07787543 | 6  | 0.00907447 | 0.29924764  | 0.41731082  |
| cg06918928 | 12 | 0.02212384 | 0.21135036  | 0.329410917 |
| cg22484690 | 1  | 0.000313   | 0.621845056 | 0.739901562 |
| cg26365847 | 14 | 0.03095141 | 0.456571829 | 0.57454517  |
| cg10137191 | 14 | 0.0262525  | 0.74063373  | 0.85850432  |
| cg01289290 | 3  | 0.00217777 | 0.650007718 | 0.767866333 |
| cg02546828 | 8  | 0.00036723 | 0.644692261 | 0.762516186 |
| cg11524773 | 6  | 0.04977017 | 0.291031419 | 0.408763948 |
| cg13537774 | 9  | 0.01534086 | 0.605836842 | 0.723508431 |
| cg14863944 | 13 | 0.01452969 | 0.712084173 | 0.829747314 |
| cg00165078 | 1  | 0.00286636 | 0.516230282 | 0.633845171 |
| cg20845639 | 8  | 0.00104441 | 0.217010278 | 0.334594471 |
| cg14706317 | 5  | 0.00633297 | 0.441167524 | 0.558743438 |
| cg04705429 | 10 | 0.00481317 | 0.589698955 | 0.707250731 |
| cg02654265 | 5  | 0.01096723 | 0.556256785 | 0.673793464 |
| cg15197135 | 19 | 0.00133684 | 0.306671245 | 0.424119435 |
| cg08224682 | 5  | 0.02684297 | 0.133593279 | 0.251024689 |
| cg09011316 | 1  | 0.01508684 | 0.43183095  | 0.549244189 |
| cg07498426 | 11 | 0.0027678  | 0.660095884 | 0.77750408  |
| cg22975521 | 2  | 0.00893625 | 0.162827838 | 0.280208571 |
| cg03748603 | 19 | 0.00350029 | 0.156116976 | 0.273493493 |
| cg27298940 | 7  | 0.00380548 | 0.290038227 | 0.407398834 |
| cg12370929 | 9  | 0.03603698 | 0.195961634 | 0.313303277 |
| cg25256538 | 6  | 0.01690554 | 0.385251466 | 0.502579242 |
| cg25294526 | 17 | 0.02615914 | 0.357777822 | 0.475091463 |
| cg24692595 | 3  | 0.03508157 | 0.606905621 | 0.72420597  |
| cg13494055 | 3  | 0.00054667 | 0.623734088 | 0.741013236 |
| cg25073998 | 2  | 0.00569323 | 0.124242569 | 0.241515893 |
| cg00730887 | 4  | 0.03612204 | 0.160734448 | 0.277996908 |
| cg23117727 | 20 | 0.00286591 | 0.648537261 | 0.765796477 |
| cg16454587 | 11 | 0.00459456 | 0.721170699 | 0.838404368 |
| cg11877773 | 14 | 0.00294665 | 0.444676799 | 0.56189683  |
| cg25007799 | 4  | 0.01363205 | 0.273419957 | 0.390611192 |
| cg16252110 | 5  | 0.00584864 | 0.631544536 | 0.748529266 |
| cg06876766 | 12 | 0.01668188 | 0.518101558 | 0.635070578 |
| cg23186787 | 4  | 0.04520707 | 0.409642782 | 0.526603903 |
| cg01403655 | 13 | 0.00167449 | 0.604701517 | 0.721614718 |
| cg20595634 | 10 | 0.03307157 | 0.329819051 | 0.446707277 |
| cg19406113 | 6  | 0.00268889 | 0.289196437 | 0.406016762 |
| cg25063631 | 7  | 0.03326982 | 0.329423565 | 0.446185257 |
| cg06100639 | 7  | 0.01933429 | 0.098176508 | 0.214913679 |
| cg16784234 | 7  | 0.0129044  | 0.199731658 | 0.316465623 |
| cg15165950 | 5  | 0.01290556 | 0.767522031 | 0.884213951 |
| cg01869093 | 14 | 0.00210225 | 0.178594373 | 0.295245962 |
| cg01454395 | 17 | 0.00284739 | 0.193971508 | 0.310609096 |
| cg09634094 | 15 | 0.03618258 | 0.223399148 | 0.340027535 |

|            |    |            |             |             |
|------------|----|------------|-------------|-------------|
| cg02093902 | 2  | 0.01718676 | 0.110607471 | 0.227215982 |
| cg04608582 | 1  | 0.04914542 | 0.130158117 | 0.246735601 |
| cg21263664 | 1  | 0.04464728 | 0.209792058 | 0.326346708 |
| cg05839818 | 16 | 0.00390123 | 0.309784809 | 0.42630738  |
| cg15084405 | 3  | 0.03130572 | 0.651546365 | 0.768065835 |
| cg12858864 | 15 | 0.00126685 | 0.426019516 | 0.54250302  |
| cg17614703 | 5  | 0.02074036 | 0.445877009 | 0.562292531 |
| cg04491064 | 8  | 0.03183524 | 0.130884889 | 0.247293368 |
| cg10284425 | 16 | 0.01547024 | 0.147474452 | 0.263852062 |
| cg25925252 | 5  | 0.00018505 | 0.306627927 | 0.422974433 |
| cg16796458 | 16 | 0.00076608 | 0.686057458 | 0.802346773 |
| cg05082557 | 17 | 0.01640221 | 0.238196034 | 0.354439639 |
| cg14704669 | 10 | 0.00572475 | 0.120916185 | 0.237121562 |
| cg18490269 | 7  | 3.75E-05   | 0.748640303 | 0.864784816 |
| cg06645120 | 16 | 0.01031184 | 0.59209981  | 0.708189299 |
| cg25310427 | 11 | 0.00368547 | 0.627748448 | 0.7438239   |
| cg11093508 | 8  | 0.02428292 | 0.109085585 | 0.225160558 |
| cg08183425 | 2  | 0.0005133  | 0.393579037 | 0.509578975 |
| cg14852082 | 4  | 0.023552   | 0.30155025  | 0.417520584 |
| cg21445793 | 3  | 0.04546852 | 0.142522064 | 0.258356693 |
| cg08344493 | 11 | 0.0002286  | 0.778279671 | 0.894092257 |
| cg01116425 | 2  | 0.04800691 | 0.356325947 | 0.472070882 |
| cg08244518 | 22 | 0.01627092 | 0.5140926   | 0.629767133 |
| cg24987667 | 4  | 0.00938573 | 0.44089702  | 0.556569857 |
| cg11301492 | 17 | 0.00066488 | 0.250894609 | 0.366509532 |
| cg09802893 | 7  | 0.017504   | 0.647788467 | 0.763386194 |
| cg01418539 | 2  | 0.01713086 | 0.116539885 | 0.232120696 |
| cg24444839 | 21 | 0.0010109  | 0.176323947 | 0.291819732 |
| cg17157725 | 22 | 0.02055773 | 0.392716502 | 0.508191193 |
| cg00186374 | 2  | 0.03440898 | 0.457798511 | 0.573272548 |
| cg13235891 | 12 | 0.01930262 | 0.146221658 | 0.261663989 |
| cg02750941 | 5  | 0.00571717 | 0.647242616 | 0.762678118 |
| cg03395044 | 6  | 0.02986137 | 0.657470186 | 0.772895352 |
| cg05801374 | 1  | 0.00627271 | 0.387634834 | 0.503041989 |
| cg11584284 | 6  | 0.00124864 | 0.644600767 | 0.759977498 |
| cg17245996 | 1  | 0.02494884 | 0.763155867 | 0.878461785 |
| cg11204139 | 17 | 0.00136065 | 0.257552206 | 0.372850079 |
| cg08211704 | 8  | 0.01453415 | 0.570983712 | 0.686274009 |
| cg16838749 | 2  | 0.00480983 | 0.404848928 | 0.520105489 |
| cg22221047 | 3  | 0.04540939 | 0.399470249 | 0.514712328 |
| cg00189276 | 6  | 0.02826185 | 0.38722746  | 0.502427228 |
| cg22115196 | 4  | 0.04004962 | 0.469843563 | 0.585031561 |
| cg26575105 | 6  | 0.00359406 | 0.387338824 | 0.502517925 |
| cg15741354 | 8  | 0.01710834 | 0.231063324 | 0.346236226 |
| cg08371532 | 5  | 0.01098658 | 0.274438362 | 0.389606607 |
| cg26167249 | 11 | 0.00788112 | 0.416670767 | 0.531835523 |

|            |    |            |             |             |
|------------|----|------------|-------------|-------------|
| cg05461734 | 10 | 0.0023188  | 0.122948049 | 0.238040212 |
| cg00637745 | 2  | 0.03787876 | 0.157430271 | 0.272494631 |
| cg01519508 | 16 | 9.97E-05   | 0.475249673 | 0.59030752  |
| cg13800828 | 12 | 0.01146169 | 0.725289291 | 0.840260408 |
| cg17248961 | 2  | 0.01046405 | 0.524882083 | 0.639821661 |
| cg01243072 | 2  | 0.03427827 | 0.306620938 | 0.421550215 |
| cg19967176 | 15 | 0.0009825  | 0.547963048 | 0.66287295  |
| cg17826530 | 1  | 0.00864964 | 0.234563155 | 0.349446434 |
| cg05261299 | 12 | 0.00947938 | 0.32629533  | 0.441119601 |
| cg23860266 | 6  | 0.00139866 | 0.729023712 | 0.843787355 |
| cg07894586 | 2  | 0.00455801 | 0.719456707 | 0.834173563 |
| cg20660989 | 6  | 0.00102851 | 0.2921041   | 0.406807536 |
| cg10793646 | 12 | 0.02532338 | 0.293554951 | 0.408256821 |
| cg07535366 | 5  | 0.00044198 | 0.625063147 | 0.739745271 |
| cg14240060 | 10 | 0.04062619 | 0.355943187 | 0.470563893 |
| cg16589887 | 2  | 0.04393244 | 0.170250127 | 0.28484228  |
| cg01154336 | 14 | 0.00120527 | 0.199427925 | 0.313981836 |
| cg08089449 | 11 | 0.00493714 | 0.726926975 | 0.841453185 |
| cg19730314 | 2  | 0.04217657 | 0.351863914 | 0.466278504 |
| cg00490603 | 22 | 0.0030624  | 0.151600412 | 0.265984063 |
| cg21388543 | 7  | 0.00882765 | 0.178149259 | 0.292518854 |
| cg26958236 | 21 | 0.04344125 | 0.742298167 | 0.856660614 |
| cg06444374 | 1  | 0.00218492 | 0.616627894 | 0.730941863 |
| cg03874542 | 10 | 0.04432129 | 0.48061356  | 0.594921859 |
| cg22156126 | 12 | 0.01126249 | 0.112322357 | 0.226629445 |
| cg07856667 | 10 | 0.00204167 | 0.379935105 | 0.494232176 |
| cg04206219 | 6  | 0.01862287 | 0.275361561 | 0.389600735 |
| cg09213451 | 14 | 0.00615186 | 0.476554601 | 0.590713737 |
| cg22036872 | 1  | 0.03526841 | 0.508094871 | 0.622196778 |
| cg27540038 | 15 | 0.04507361 | 0.321979398 | 0.436068557 |
| cg16580616 | 1  | 0.00088805 | 0.236361587 | 0.350323522 |
| cg05745631 | 6  | 0.01838494 | 0.130262195 | 0.244220499 |
| cg26576890 | 6  | 0.00126955 | 0.328448287 | 0.442340238 |
| cg00753748 | 3  | 0.04405553 | 0.39105844  | 0.504932485 |
| cg25088412 | 6  | 0.02562303 | 0.141412802 | 0.255282005 |
| cg07160420 | 17 | 0.02580413 | 0.100277231 | 0.213986863 |
| cg16790843 | 16 | 0.00861742 | 0.412973444 | 0.526653696 |
| cg18210128 | 12 | 0.03394871 | 0.110657401 | 0.224311046 |
| cg17011134 | 1  | 0.00029333 | 0.59655935  | 0.710087474 |
| cg06091804 | 4  | 0.01124922 | 0.243566055 | 0.357001607 |
| cg01760876 | 8  | 0.01937737 | 0.225136072 | 0.33854692  |
| cg05630208 | 11 | 0.0001566  | 0.269808568 | 0.383218745 |
| cg24172324 | 2  | 0.01043662 | 0.241660924 | 0.355048279 |
| cg24794669 | 10 | 0.00202083 | 0.464086227 | 0.577422973 |
| cg03946532 | 16 | 0.00775353 | 0.099621801 | 0.21295626  |
| cg09050372 | 2  | 0.00297649 | 0.561829054 | 0.675145125 |

|            |    |            |             |             |
|------------|----|------------|-------------|-------------|
| cg13583664 | 9  | 0.01735953 | 0.209796057 | 0.323094027 |
| cg03741824 | 21 | 0.00571255 | 0.325911255 | 0.439199245 |
| cg24352299 | 13 | 0.02194198 | 0.614743579 | 0.728028402 |
| cg10108888 | 7  | 0.04194734 | 0.637078403 | 0.750291986 |
| cg16175245 | 11 | 0.00466233 | 0.193498836 | 0.306660765 |
| cg05138082 | 14 | 0.00455494 | 0.409241983 | 0.522368771 |
| cg24067325 | 5  | 0.04435902 | 0.518260722 | 0.631368727 |
| cg08508936 | 5  | 0.01723995 | 0.441242406 | 0.554298919 |
| cg19235893 | 2  | 0.00121904 | 0.145001777 | 0.258042188 |
| cg00068428 | 8  | 0.00092663 | 0.16610384  | 0.279140094 |
| cg24527591 | 3  | 0.03031327 | 0.263382125 | 0.376370478 |
| cg07878857 | 3  | 0.02562303 | 0.792697548 | 0.905683001 |
| cg12656424 | 2  | 0.00095015 | 0.662040985 | 0.775023609 |
| cg03574652 | 3  | 0.01109281 | 0.177302315 | 0.290280261 |
| cg19403312 | 8  | 0.02942734 | 0.178091887 | 0.291037639 |
| cg08490246 | 4  | 0.01782871 | 0.463616753 | 0.576550295 |
| cg08981844 | 8  | 0.0170232  | 0.179171347 | 0.292058434 |
| cg21249595 | 6  | 0.00064344 | 0.53339135  | 0.646231499 |
| cg02607059 | 15 | 0.00259008 | 0.306561187 | 0.419398118 |
| cg14751481 | 12 | 0.00201496 | 0.164953849 | 0.277732811 |
| cg27251686 | 2  | 0.04336784 | 0.622925504 | 0.735694848 |
| cg08317243 | 16 | 8.11E-05   | 0.656910101 | 0.769671983 |
| cg03147324 | 15 | 0.00103917 | 0.240555405 | 0.353311283 |
| cg09345153 | 16 | 0.01266047 | 0.229502494 | 0.342173863 |
| cg09789874 | 12 | 0.01338637 | 0.114187273 | 0.226806606 |
| cg17578330 | 17 | 0.02195181 | 0.647728241 | 0.76025805  |
| cg20488341 | 1  | 0.01673168 | 0.119650219 | 0.232179594 |
| cg19209355 | 4  | 0.00253958 | 0.629656415 | 0.74217883  |
| cg25927044 | 10 | 0.02234265 | 0.282767138 | 0.395254345 |
| cg24183575 | 3  | 0.00115876 | 0.437065468 | 0.549480215 |
| cg22138219 | 8  | 0.04303182 | 0.567468231 | 0.679813074 |
| cg12888521 | 8  | 0.01590383 | 0.430664    | 0.542985006 |
| cg18400751 | 19 | 0.01404181 | 0.583827129 | 0.696136902 |
| cg05006231 | 19 | 0.01109619 | 0.110951536 | 0.223255484 |
| cg26543150 | 10 | 0.04099143 | 0.133942962 | 0.246231349 |
| cg21934189 | 7  | 0.01272448 | 0.469924077 | 0.582172134 |
| cg02630854 | 3  | 0.00275736 | 0.739235374 | 0.851472808 |
| cg06450976 | 6  | 0.00280033 | 0.680069209 | 0.792274425 |
| cg23024254 | 1  | 0.04552246 | 0.301065392 | 0.413195601 |
| cg22959827 | 5  | 0.01938417 | 0.482189946 | 0.594238795 |
| cg03962019 | 1  | 0.00168732 | 0.201227281 | 0.313267814 |
| cg11981639 | 6  | 0.02700344 | 0.142626928 | 0.254648704 |
| cg24603922 | 6  | 0.00274278 | 0.437141592 | 0.549159557 |
| cg27598583 | 16 | 0.00065288 | 0.335539675 | 0.447547851 |
| cg16740893 | 10 | 0.00433569 | 0.53278276  | 0.644773309 |
| cg25668878 | 3  | 0.00799701 | 0.592966352 | 0.704924186 |

|            |    |            |             |             |
|------------|----|------------|-------------|-------------|
| cg14501119 | 14 | 0.00092027 | 0.253278236 | 0.365152949 |
| cg09858767 | 1  | 0.01299946 | 0.143685041 | 0.255523952 |
| cg22270027 | 4  | 0.00822802 | 0.137997341 | 0.249799857 |
| cg20817822 | 1  | 0.00023669 | 0.670305456 | 0.782072978 |
| cg13280063 | 6  | 0.029122   | 0.299554921 | 0.411272973 |
| cg02522990 | 16 | 0.00279548 | 0.552225809 | 0.663886285 |
| cg00062285 | 3  | 0.01198293 | 0.749584669 | 0.86123393  |
| cg14827149 | 1  | 0.02023468 | 0.138201132 | 0.249824133 |
| cg02981163 | 16 | 0.00021379 | 0.254613963 | 0.366179061 |
| cg27345924 | 5  | 0.00095015 | 0.123114474 | 0.234663131 |
| cg09813060 | 11 | 0.00808486 | 0.135029616 | 0.246536586 |
| cg11703759 | 1  | 0.0332966  | 0.656172228 | 0.76767684  |
| cg26195356 | 5  | 0.0168656  | 0.201034874 | 0.312521701 |
| cg18788664 | 1  | 0.00135609 | 0.45561324  | 0.567082529 |
| cg04743876 | 7  | 0.04842179 | 0.132902252 | 0.244367562 |
| cg12141340 | 1  | 0.00281379 | 0.157455556 | 0.268881012 |
| cg13945265 | 5  | 0.01991605 | 0.448532583 | 0.559911402 |
| cg01555052 | 14 | 0.01720963 | 0.528820054 | 0.640167211 |
| cg05846378 | 5  | 0.0097083  | 0.549580797 | 0.660906432 |
| cg06883206 | 4  | 0.00082972 | 0.248895849 | 0.360214056 |
| cg01386185 | 3  | 0.02533534 | 0.129193831 | 0.240494904 |
| cg23535322 | 14 | 0.00521727 | 0.308025047 | 0.419303818 |
| cg13202523 | 7  | 0.00989094 | 0.14045741  | 0.251729457 |
| cg18090631 | 3  | 0.0413485  | 0.622938581 | 0.734186846 |
| cg19502359 | 11 | 0.00827584 | 0.198791648 | 0.309975173 |
| cg12159689 | 7  | 0.02280539 | 0.560570696 | 0.671746009 |
| cg21440365 | 8  | 0.00313139 | 0.32736183  | 0.438466215 |
| cg04575155 | 12 | 0.04807581 | 0.142320588 | 0.253401443 |
| cg24335273 | 3  | 0.00411751 | 0.694039172 | 0.805098967 |
| cg17073708 | 8  | 0.0346864  | 0.394848323 | 0.505902112 |
| cg19489503 | 10 | 0.01929421 | 0.223649602 | 0.334685444 |
| cg22286764 | 3  | 0.00248378 | 0.168282669 | 0.279315933 |
| cg02862059 | 10 | 0.00753928 | 0.520299035 | 0.631326816 |
| cg09386265 | 19 | 0.00387497 | 0.204463664 | 0.315476874 |
| cg14908766 | 12 | 0.02679599 | 0.739625034 | 0.850591869 |
| cg00094585 | 1  | 0.04438838 | 0.122254134 | 0.233191932 |
| cg21766308 | 3  | 0.01936781 | 0.160839669 | 0.271747309 |
| cg06582782 | 12 | 0.00317774 | 0.226602955 | 0.337488118 |
| cg24869667 | 11 | 0.00047744 | 0.693311292 | 0.804182646 |
| cg14582917 | 9  | 0.04431906 | 0.230795351 | 0.341652823 |
| cg18736835 | 2  | 0.03595757 | 0.107527545 | 0.218165603 |
| cg19198993 | 12 | 0.03167299 | 0.343714584 | 0.454235481 |
| cg08422172 | 16 | 0.00320482 | 0.510368131 | 0.620885315 |
| cg14635132 | 9  | 0.00068807 | 0.533364719 | 0.643845717 |
| cg17350441 | 10 | 0.02838444 | 0.730912632 | 0.841384136 |
| cg02408252 | 11 | 0.00320482 | 0.255540905 | 0.365998523 |

|            |    |            |             |             |
|------------|----|------------|-------------|-------------|
| cg20192747 | 18 | 0.01094413 | 0.102397894 | 0.212853786 |
| cg14530444 | 2  | 0.00695699 | 0.223829705 | 0.334262354 |
| cg27065717 | 16 | 0.00184507 | 0.675303456 | 0.785711951 |
| cg18563005 | 12 | 0.01055805 | 0.617728448 | 0.728132062 |
| cg04494270 | 1  | 0.00424792 | 0.698273464 | 0.808676429 |
| cg13663057 | 6  | 0.00498959 | 0.752221401 | 0.862568537 |
| cg16149927 | 21 | 0.02267561 | 0.296119573 | 0.406438388 |
| cg14171369 | 14 | 0.00434916 | 0.164697163 | 0.27500001  |
| cg27070962 | 6  | 0.00056138 | 0.236916122 | 0.347216107 |
| cg18002126 | 7  | 0.01353714 | 0.294470278 | 0.40476222  |
| cg16858121 | 11 | 0.00089798 | 0.739920904 | 0.850179615 |
| cg14549841 | 12 | 0.04242103 | 0.495141192 | 0.605353056 |
| cg01019249 | 5  | 0.00030589 | 0.615736417 | 0.725928515 |
| cg15843929 | 2  | 0.00347    | 0.632870293 | 0.743009121 |
| cg00837308 | 16 | 0.0154434  | 0.590479186 | 0.700598104 |
| cg22150680 | 3  | 0.01022347 | 0.222492997 | 0.332598419 |
| cg07725206 | 1  | 0.00341696 | 0.156140924 | 0.266186178 |
| cg04131101 | 11 | 0.01570154 | 0.210001132 | 0.32004537  |
| cg09998597 | 7  | 0.0196675  | 0.3696935   | 0.479730414 |
| cg07627452 | 13 | 0.00479847 | 0.126813929 | 0.236793683 |
| cg19320803 | 12 | 0.00107112 | 0.626028448 | 0.735975514 |
| cg13936846 | 9  | 0.01227498 | 0.14230144  | 0.252238235 |
| cg02059896 | 2  | 0.01905014 | 0.626790706 | 0.736629717 |
| cg06420903 | 16 | 0.01194551 | 0.157390436 | 0.267218988 |
| cg22258600 | 11 | 0.01258509 | 0.242757346 | 0.352540677 |
| cg06482783 | 5  | 0.01186031 | 0.675185099 | 0.784953372 |
| cg23014221 | 1  | 0.0112218  | 0.100027038 | 0.209773481 |
| cg10310751 | 11 | 0.02759288 | 0.651008814 | 0.760747718 |
| cg26529963 | 8  | 0.04037972 | 0.818815944 | 0.928546132 |
| cg02525997 | 8  | 0.00104629 | 0.139508511 | 0.249238406 |
| cg11711501 | 8  | 0.00843257 | 0.446734973 | 0.556459656 |
| cg05310240 | 17 | 0.03292248 | 0.453654422 | 0.563331832 |
| cg04119984 | 5  | 0.00090542 | 0.214021929 | 0.323645808 |
| cg02627405 | 5  | 0.00021417 | 0.693883046 | 0.803413846 |
| cg25180701 | 12 | 0.01936995 | 0.753509041 | 0.863016232 |
| cg25731866 | 6  | 0.00838167 | 0.583381642 | 0.692857263 |
| cg27574223 | 12 | 0.032524   | 0.202034384 | 0.311494362 |
| cg27544294 | 22 | 0.00156139 | 0.694155735 | 0.803569862 |
| cg15554023 | 1  | 0.00952559 | 0.179567452 | 0.288961617 |
| cg14244013 | 17 | 0.00045375 | 0.210094306 | 0.319485329 |
| cg16993013 | 15 | 0.00836843 | 0.663619112 | 0.772960954 |
| cg04570228 | 13 | 0.04389993 | 0.354678017 | 0.464006452 |
| cg14459158 | 9  | 0.02086509 | 0.137756756 | 0.24702987  |
| cg07995438 | 11 | 0.01794608 | 0.253151556 | 0.362421677 |
| cg11719784 | 1  | 0.00680299 | 0.621365835 | 0.730566651 |
| cg01660613 | 20 | 0.03161936 | 0.416938588 | 0.526130659 |

|            |    |            |             |             |
|------------|----|------------|-------------|-------------|
| cg21920871 | 1  | 0.00115842 | 0.696500157 | 0.805610354 |
| cg01847889 | 22 | 0.01429009 | 0.150320262 | 0.259388897 |
| cg00760938 | 2  | 0.00828779 | 0.516587957 | 0.625637075 |
| cg27039593 | 5  | 0.02858115 | 0.189321089 | 0.298360812 |
| cg13820776 | 9  | 0.00235505 | 0.509422156 | 0.618458296 |
| cg25428846 | 4  | 0.00521349 | 0.166807279 | 0.275834943 |
| cg02066441 | 1  | 0.0089938  | 0.123135565 | 0.232137609 |
| cg14923188 | 6  | 0.00159104 | 0.778374941 | 0.887312415 |
| cg13797402 | 4  | 0.00136522 | 0.700961674 | 0.809719615 |
| cg14498227 | 11 | 0.03209257 | 0.306236349 | 0.414968396 |
| cg23341085 | 2  | 0.00036111 | 0.228697093 | 0.337361875 |
| cg13753662 | 17 | 0.00197953 | 0.614372202 | 0.72297036  |
| cg11902934 | 5  | 0.0045211  | 0.481745803 | 0.59028014  |
| cg07006398 | 16 | 0.02948023 | 0.519374041 | 0.627899665 |
| cg22391205 | 21 | 0.00620044 | 0.147132331 | 0.255657154 |
| cg24219974 | 6  | 0.01252268 | 0.487246719 | 0.595742964 |
| cg10281996 | 11 | 0.0018073  | 0.120546426 | 0.229039612 |
| cg01404464 | 17 | 0.02074888 | 0.599642635 | 0.708062286 |
| cg23375895 | 6  | 0.0091327  | 0.451427019 | 0.559798955 |
| cg23670779 | 7  | 0.00799362 | 0.215089877 | 0.323384907 |
| cg05212260 | 17 | 0.01045706 | 0.174697412 | 0.282923191 |
| cg26924392 | 17 | 0.03070246 | 0.33591727  | 0.444137589 |
| cg09060081 | 11 | 0.00272127 | 0.387330499 | 0.495516261 |
| cg05488279 | 17 | 0.04878722 | 0.3369979   | 0.445172679 |
| cg25460984 | 6  | 0.0003693  | 0.131621606 | 0.239776482 |
| cg14306161 | 15 | 0.0061754  | 0.433697183 | 0.54182402  |
| cg14460008 | 2  | 0.01419886 | 0.609460805 | 0.717547716 |
| cg15432303 | 12 | 0.03273511 | 0.520420481 | 0.628424236 |
| cg22635041 | 10 | 0.02603101 | 0.454122434 | 0.562098592 |
| cg07178188 | 5  | 0.00458988 | 0.509868442 | 0.617835242 |
| cg21692666 | 1  | 0.01728506 | 0.1167214   | 0.22462262  |
| cg19747745 | 21 | 0.00531822 | 0.422719499 | 0.53058881  |
| cg04158049 | 1  | 0.00229373 | 0.500996755 | 0.60886291  |
| cg18450319 | 7  | 0.0375861  | 0.241276375 | 0.349116644 |
| cg25007447 | 12 | 0.00945854 | 0.114738589 | 0.222552862 |
| cg03085321 | 9  | 0.00127444 | 0.190555366 | 0.298365412 |
| cg08532862 | 5  | 0.00781901 | 0.41359521  | 0.521395576 |
| cg26192279 | 2  | 0.00816634 | 0.721833836 | 0.829616381 |
| cg27031099 | 8  | 0.03612308 | 0.118529803 | 0.22630716  |
| cg15813266 | 4  | 0.00148988 | 0.743625337 | 0.851401095 |
| cg21398280 | 8  | 0.01900259 | 0.18857771  | 0.296208084 |
| cg14548047 | 5  | 0.00567491 | 0.137929586 | 0.245498048 |
| cg26890480 | 10 | 0.00095015 | 0.654730711 | 0.762294719 |
| cg09798077 | 5  | 0.01596705 | 0.55076337  | 0.65831494  |
| cg15741935 | 2  | 0.00931957 | 0.341198296 | 0.448723949 |
| cg02309609 | 15 | 0.0024617  | 0.641811399 | 0.749325277 |

|            |    |            |             |             |
|------------|----|------------|-------------|-------------|
| cg10969209 | 1  | 0.04900507 | 0.1979777   | 0.305450015 |
| cg07140792 | 5  | 0.0302426  | 0.103683146 | 0.211134052 |
| cg03779072 | 16 | 0.00408945 | 0.189826771 | 0.297238414 |
| cg22499307 | 3  | 0.03555312 | 0.351784126 | 0.459124456 |
| cg27070372 | 19 | 0.00080013 | 0.497422069 | 0.604727076 |
| cg06641357 | 16 | 0.00294467 | 0.211663431 | 0.318960854 |
| cg03754098 | 16 | 0.00933134 | 0.132989678 | 0.240279106 |
| cg16051543 | 4  | 0.01253961 | 0.787904703 | 0.895168484 |
| cg02909592 | 3  | 0.0494292  | 0.674074347 | 0.781320386 |
| cg03018931 | 14 | 0.0233306  | 0.179427358 | 0.286610663 |
| cg19497082 | 2  | 0.03578741 | 0.205379674 | 0.312556581 |
| cg09155881 | 2  | 0.01285594 | 0.181988017 | 0.289163741 |
| cg15080403 | 11 | 0.00060628 | 0.632115219 | 0.739215426 |
| cg11368900 | 10 | 0.0263203  | 0.625348359 | 0.732445947 |
| cg06535003 | 6  | 0.023503   | 0.100768369 | 0.207842771 |
| cg01883051 | 6  | 0.00679476 | 0.675108157 | 0.782164692 |
| cg14875327 | 3  | 0.00456598 | 0.349680292 | 0.456729609 |
| cg00724403 | 2  | 0.04691102 | 0.679148335 | 0.786190509 |
| cg09052626 | 16 | 0.00650476 | 0.165402789 | 0.272414789 |
| cg04809712 | 7  | 0.0191262  | 0.681069706 | 0.78807772  |
| cg18878713 | 20 | 0.02006598 | 0.619350781 | 0.72632949  |
| cg21110769 | 7  | 0.00322426 | 0.346123266 | 0.453078446 |
| cg10779202 | 7  | 0.02692274 | 0.23090345  | 0.337848538 |
| cg27310831 | 8  | 0.00664881 | 0.594748561 | 0.701674096 |
| cg11307812 | 13 | 0.01043212 | 0.797667692 | 0.904532414 |
| cg19883472 | 6  | 0.04885248 | 0.496166732 | 0.603002143 |
| cg17990185 | 17 | 0.00778144 | 0.64046675  | 0.747289496 |
| cg10696504 | 13 | 0.03428768 | 0.436401598 | 0.543211931 |
| cg26224624 | 15 | 0.04249218 | 0.226054365 | 0.332851751 |
| cg06794141 | 16 | 0.0206862  | 0.102822277 | 0.209560717 |
| cg24794052 | 10 | 0.03260126 | 0.126408782 | 0.233143827 |
| cg06536115 | 1  | 0.00361635 | 0.756886246 | 0.863619567 |
| cg12350309 | 12 | 0.01339192 | 0.163761875 | 0.270484686 |
| cg15582257 | 12 | 0.0231669  | 0.398665969 | 0.505375778 |
| cg04789475 | 4  | 0.00102527 | 0.178721021 | 0.285417119 |
| cg11603201 | 12 | 0.00105563 | 0.732812627 | 0.839481342 |
| cg19821713 | 15 | 0.00011752 | 0.198527801 | 0.305190756 |
| cg22981555 | 4  | 0.0333593  | 0.630007834 | 0.736666179 |
| cg17915922 | 7  | 0.02269574 | 0.437914339 | 0.544553477 |
| cg09533305 | 22 | 0.01631414 | 0.239130992 | 0.345752218 |
| cg13469457 | 9  | 0.01947387 | 0.255148051 | 0.361754898 |
| cg10152627 | 3  | 0.02529772 | 0.282765342 | 0.389352457 |
| cg07132942 | 10 | 0.01611774 | 0.597604925 | 0.704106572 |
| cg01369895 | 3  | 0.03384481 | 0.119883242 | 0.226384824 |
| cg03321196 | 12 | 0.03121561 | 0.103253102 | 0.20973743  |
| cg11478584 | 8  | 0.04288188 | 0.509404088 | 0.615881867 |



|            |    |            |             |             |
|------------|----|------------|-------------|-------------|
| cg11315081 | 13 | 0.00592895 | 0.721761406 | 0.828214374 |
| cg25669593 | 6  | 0.00405378 | 0.136212098 | 0.242657739 |
| cg21910416 | 5  | 0.0421682  | 0.148371803 | 0.254802317 |
| cg27535538 | 7  | 0.00431366 | 0.489741661 | 0.596127649 |
| cg23365135 | 7  | 0.04519375 | 0.286911275 | 0.393241893 |
| cg05740106 | 6  | 0.01132914 | 0.760742064 | 0.867059393 |
| cg07007213 | 11 | 0.00095747 | 0.68543081  | 0.791698209 |
| cg03393238 | 1  | 0.00692158 | 0.671254207 | 0.777511512 |
| cg19704630 | 17 | 0.00699575 | 0.622426232 | 0.728651386 |
| cg27181496 | 3  | 0.01168792 | 0.454946183 | 0.561163881 |
| cg10249570 | 19 | 0.03576059 | 0.475341262 | 0.581554003 |
| cg13285846 | 8  | 0.01147254 | 0.183873189 | 0.290079497 |
| cg13544294 | 17 | 0.00078969 | 0.188861295 | 0.295014435 |
| cg19129687 | 13 | 0.01819389 | 0.508661354 | 0.614803238 |
| cg08772942 | 17 | 0.00538038 | 0.290824827 | 0.396927807 |
| cg06873567 | 15 | 0.01413356 | 0.32974994  | 0.43583829  |
| cg26955580 | 16 | 0.00024638 | 0.715513644 | 0.821556778 |
| cg16788656 | 16 | 0.00976074 | 0.212072918 | 0.318054781 |
| cg26274812 | 14 | 0.01791817 | 0.099102194 | 0.205057274 |
| cg09358961 | 16 | 0.00180374 | 0.515623039 | 0.621533721 |
| cg08523756 | 11 | 0.04251008 | 0.620294181 | 0.726160121 |
| cg12647302 | 1  | 0.00157943 | 0.270550773 | 0.376385229 |
| cg18156831 | 2  | 0.01554969 | 0.388034055 | 0.493749411 |
| cg00536718 | 7  | 0.03887775 | 0.207980409 | 0.313677608 |
| cg00022997 | 6  | 0.02102593 | 0.134227973 | 0.239795146 |
| cg18184053 | 10 | 0.00633663 | 0.123224366 | 0.228767586 |
| cg13451356 | 1  | 0.00262461 | 0.152645753 | 0.258185296 |
| cg27450467 | 12 | 0.02835893 | 0.680970873 | 0.78643415  |
| cg02161534 | 5  | 0.04948019 | 0.846089163 | 0.951547771 |
| cg04834821 | 11 | 0.01659129 | 0.153097482 | 0.258554488 |
| cg13351249 | 6  | 0.01119724 | 0.155007549 | 0.260453224 |
| cg17273096 | 6  | 0.04328745 | 0.523495529 | 0.628933768 |
| cg26477792 | 6  | 0.01631752 | 0.168905772 | 0.274343322 |
| cg12871937 | 3  | 0.01642652 | 0.507368224 | 0.612797913 |
| cg23414580 | 4  | 0.0001037  | 0.252309884 | 0.357726192 |
| cg18899220 | 13 | 0.00628426 | 0.443476141 | 0.548805738 |
| cg18202392 | 18 | 0.04521179 | 0.558450105 | 0.663773598 |
| cg04574896 | 1  | 0.03332601 | 0.094609601 | 0.199925019 |
| cg00992348 | 10 | 0.0132875  | 0.103268882 | 0.208577082 |
| cg17455297 | 1  | 0.04158335 | 0.36826226  | 0.473565841 |
| cg05653714 | 3  | 0.00456828 | 0.226706544 | 0.331985653 |
| cg26814835 | 20 | 0.0026328  | 0.111822247 | 0.217100229 |
| cg19049837 | 2  | 0.00073359 | 0.343377117 | 0.448631272 |
| cg17187167 | 8  | 0.00124465 | 0.31626815  | 0.421488473 |
| cg08234689 | 7  | 0.01258337 | 0.160017444 | 0.265223356 |
| cg18718469 | 6  | 0.03301683 | 0.322954823 | 0.42811451  |

|            |    |            |             |             |
|------------|----|------------|-------------|-------------|
| cg06034711 | 8  | 0.00280051 | 0.592867267 | 0.698015541 |
| cg20735682 | 6  | 0.00102668 | 0.393778    | 0.498911536 |
| cg02879967 | 11 | 0.01002155 | 0.717185041 | 0.822298656 |
| cg06842409 | 20 | 0.01460856 | 0.139911772 | 0.244990604 |
| cg13207606 | 6  | 0.0060033  | 0.694536359 | 0.799576722 |
| cg06097423 | 12 | 0.03774595 | 0.708704315 | 0.81373918  |
| cg08698198 | 5  | 0.00109493 | 0.251936493 | 0.356950353 |
| cg09604238 | 12 | 0.00552218 | 0.525712014 | 0.630716018 |
| cg13236409 | 12 | 0.00466835 | 0.250838251 | 0.355740395 |
| cg07007165 | 17 | 0.00451924 | 0.649359803 | 0.754244747 |
| cg00315395 | 11 | 0.02010621 | 0.659050162 | 0.763887089 |
| cg14807682 | 8  | 0.0062503  | 0.274031385 | 0.378813435 |
| cg00089966 | 5  | 0.04311279 | 0.181115029 | 0.285866583 |
| cg04483062 | 6  | 0.02716725 | 0.333415868 | 0.438135361 |
| cg15459887 | 10 | 0.00023272 | 0.670648568 | 0.775350768 |
| cg09329936 | 10 | 0.01590107 | 0.097064256 | 0.201721613 |
| cg17152266 | 19 | 0.02758617 | 0.543202091 | 0.647850548 |
| cg02961472 | 15 | 0.04575131 | 0.586440847 | 0.691031807 |
| cg16087077 | 15 | 0.01999399 | 0.504347872 | 0.608921638 |
| cg00386586 | 13 | 0.04210046 | 0.500387446 | 0.604958147 |
| cg26693701 | 17 | 0.04092753 | 0.417269585 | 0.521799615 |
| cg06642647 | 6  | 0.00034396 | 0.50552496  | 0.610027118 |
| cg21123686 | 5  | 0.01119064 | 0.135458009 | 0.23995941  |
| cg20781516 | 1  | 0.03363389 | 0.529289748 | 0.633738133 |
| cg00871238 | 9  | 0.00475109 | 0.145951465 | 0.250355607 |
| cg07325001 | 22 | 0.00226082 | 0.198306182 | 0.302650225 |
| cg22757418 | 6  | 0.02443507 | 0.672552216 | 0.776883373 |
| cg11365710 | 12 | 0.01275464 | 0.31019049  | 0.414503522 |
| cg23692500 | 14 | 0.00620044 | 0.138104035 | 0.242378102 |
| cg19029859 | 7  | 0.01612847 | 0.256584343 | 0.360853465 |
| cg19522050 | 10 | 0.00046135 | 0.255359907 | 0.359605886 |
| cg26901915 | 1  | 0.04472929 | 0.39712635  | 0.501341118 |
| cg14410733 | 15 | 0.00164057 | 0.294588661 | 0.398794525 |
| cg23165992 | 5  | 0.04147318 | 0.592735287 | 0.696939197 |
| cg09776395 | 17 | 0.01286254 | 0.59388019  | 0.698082321 |
| cg08831381 | 8  | 0.020646   | 0.601672576 | 0.705851789 |
| cg04359418 | 10 | 0.00070777 | 0.302764679 | 0.40692112  |
| cg06766960 | 11 | 0.00065672 | 0.359495332 | 0.463576039 |
| cg00870837 | 16 | 0.00396177 | 0.24890628  | 0.352936382 |
| cg26579838 | 10 | 0.00262461 | 0.310358587 | 0.414379731 |
| cg19741660 | 14 | 0.00191332 | 0.29121902  | 0.395234002 |
| cg26137267 | 2  | 0.00016884 | 0.688123546 | 0.792088627 |
| cg01019484 | 6  | 0.01207711 | 0.290692144 | 0.394646174 |
| cg18969709 | 17 | 0.01061594 | 0.773029955 | 0.87698122  |
| cg10632966 | 10 | 0.01808718 | 0.673871958 | 0.777819883 |
| cg01161811 | 4  | 0.00367549 | 0.567620286 | 0.671475379 |

|            |    |            |             |             |
|------------|----|------------|-------------|-------------|
| cg14040679 | 9  | 0.00490616 | 0.228249711 | 0.332096572 |
| cg00908584 | 7  | 0.03134549 | 0.39544027  | 0.499250043 |
| cg27378762 | 15 | 0.04043084 | 0.155553379 | 0.259241375 |
| cg02556436 | 5  | 0.00575542 | 0.536885924 | 0.640416176 |
| cg06669226 | 7  | 0.00134809 | 0.625224955 | 0.728690136 |
| cg14008686 | 11 | 0.01304711 | 0.228264599 | 0.331664234 |
| cg24050716 | 7  | 0.01324835 | 0.522740935 | 0.626131604 |
| cg11559571 | 15 | 0.03133084 | 0.614430206 | 0.717805696 |
| cg04013650 | 8  | 0.04683225 | 0.613464992 | 0.716769882 |
| cg10303978 | 16 | 0.00060844 | 0.74295276  | 0.846127665 |
| cg12182580 | 11 | 0.04047437 | 0.610157465 | 0.713324081 |
| cg12729305 | 1  | 0.00384372 | 0.273094761 | 0.376253408 |
| cg04455286 | 12 | 0.0003561  | 0.619961147 | 0.72303381  |
| cg26795333 | 15 | 0.01526017 | 0.268192373 | 0.37123943  |
| cg03457984 | 2  | 0.00297445 | 0.524194126 | 0.627236657 |
| cg02053786 | 22 | 0.00152622 | 0.556414452 | 0.659449068 |
| cg22392876 | 7  | 0.00158387 | 0.550561517 | 0.653559713 |
| cg27277081 | 8  | 0.01844644 | 0.373403312 | 0.476395303 |
| cg13486584 | 14 | 0.01713843 | 0.64506681  | 0.748052622 |
| cg04723679 | 15 | 0.00627271 | 0.754189091 | 0.857162552 |
| cg02270420 | 16 | 0.00431291 | 0.372150842 | 0.475026062 |
| cg24969303 | 13 | 0.02183708 | 0.560782479 | 0.663620379 |
| cg18640250 | 5  | 0.02114555 | 0.266179668 | 0.368987049 |
| cg26985134 | 11 | 0.00161232 | 0.81788341  | 0.920645693 |
| cg23009263 | 14 | 0.03265935 | 0.350324795 | 0.453050034 |
| cg08533221 | 13 | 0.00458228 | 0.544095567 | 0.646812018 |
| cg25786388 | 13 | 0.04537034 | 0.221791359 | 0.324489994 |
| cg22288613 | 4  | 0.00884563 | 0.321560997 | 0.424233595 |
| cg09885505 | 16 | 0.0291738  | 0.219971333 | 0.322617989 |
| cg17224401 | 3  | 0.03398437 | 0.596854678 | 0.699488406 |
| cg24143037 | 11 | 0.01378168 | 0.664267817 | 0.766896744 |
| cg14613228 | 1  | 0.01349415 | 0.375081388 | 0.477661563 |
| cg14866167 | 8  | 0.02967151 | 0.094407682 | 0.196986581 |
| cg25728477 | 6  | 0.00766269 | 0.650191723 | 0.752747246 |
| cg01118348 | 14 | 0.00377432 | 0.303427766 | 0.40597022  |
| cg22611523 | 10 | 0.03244169 | 0.235916587 | 0.338451688 |
| cg27134084 | 7  | 0.00230169 | 0.353393216 | 0.455917597 |
| cg14502659 | 2  | 0.00651704 | 0.341711483 | 0.444172649 |
| cg24622209 | 2  | 0.00060026 | 0.561325111 | 0.663760424 |
| cg20030294 | 14 | 0.01517215 | 0.231348235 | 0.333782257 |
| cg08600213 | 11 | 0.00401973 | 0.774038995 | 0.876458242 |
| cg07591229 | 2  | 0.0444638  | 0.32364083  | 0.426045713 |
| cg27104778 | 2  | 0.0002921  | 0.765466973 | 0.867865936 |
| cg14910055 | 22 | 0.00840173 | 0.385827234 | 0.488211384 |
| cg18043120 | 2  | 0.00268919 | 0.487092281 | 0.589467969 |
| cg18261434 | 2  | 0.01214342 | 0.680866824 | 0.783212192 |

|            |    |            |             |             |
|------------|----|------------|-------------|-------------|
| cg05124918 | 12 | 0.0213434  | 0.337996947 | 0.44034008  |
| cg25449970 | 10 | 0.00438116 | 0.507618094 | 0.609940556 |
| cg16113172 | 10 | 0.0123808  | 0.320787111 | 0.42308008  |
| cg15162660 | 10 | 0.00034178 | 0.651488878 | 0.753768098 |
| cg12652502 | 2  | 0.00242091 | 0.446046587 | 0.548306531 |
| cg05636047 | 4  | 0.01237804 | 0.354469228 | 0.456710075 |
| cg22877452 | 1  | 0.03598764 | 0.212906186 | 0.315054965 |
| cg05473536 | 16 | 0.00587927 | 0.118465506 | 0.220609947 |
| cg10826956 | 19 | 0.03192211 | 0.212596206 | 0.314700711 |
| cg16957940 | 3  | 5.47E-05   | 0.24865043  | 0.350693863 |
| cg08654960 | 16 | 0.01896703 | 0.132703412 | 0.234736124 |
| cg24914884 | 2  | 0.00175973 | 0.597683249 | 0.699667946 |
| cg04174091 | 11 | 0.02030471 | 0.268494163 | 0.370464543 |
| cg13063845 | 13 | 0.00479817 | 0.339691309 | 0.441585235 |
| cg10483871 | 1  | 0.03445659 | 0.174864639 | 0.276757396 |
| cg12114200 | 13 | 0.03767514 | 0.506579196 | 0.608467307 |
| cg14987431 | 10 | 0.00067908 | 0.229913273 | 0.331790425 |
| cg04085909 | 10 | 0.02971167 | 0.567411973 | 0.669253351 |
| cg18995042 | 3  | 0.04515655 | 0.423464772 | 0.525304565 |
| cg21120402 | 2  | 0.03334969 | 0.615156346 | 0.716970973 |
| cg14623910 | 12 | 0.00132031 | 0.551620581 | 0.653419324 |
| cg13327545 | 10 | 0.00150873 | 0.222097775 | 0.3238936   |
| cg04071270 | 5  | 0.04138543 | 0.359708665 | 0.461497042 |
| cg19633390 | 13 | 0.04749454 | 0.372351249 | 0.47411911  |
| cg26286365 | 14 | 0.01123417 | 0.237677697 | 0.339403179 |
| cg12595306 | 15 | 0.00301741 | 0.165545079 | 0.267270012 |
| cg20311682 | 1  | 0.04435728 | 0.643085514 | 0.744771204 |
| cg21670944 | 8  | 0.00119278 | 0.556942398 | 0.658615846 |
| cg01159194 | 16 | 0.00606289 | 0.678165473 | 0.779809257 |
| cg15205559 | 4  | 0.02089417 | 0.637715686 | 0.739353865 |
| cg14969063 | 12 | 0.01149769 | 0.753048333 | 0.854672208 |
| cg07876823 | 6  | 0.01113474 | 0.388203349 | 0.489806103 |
| cg13866214 | 18 | 0.0182895  | 0.117006947 | 0.218605649 |
| cg16896313 | 15 | 0.02241382 | 0.11359113  | 0.215177592 |
| cg13855454 | 12 | 0.00114335 | 0.344918439 | 0.446490546 |
| cg24215525 | 12 | 0.01684298 | 0.232779404 | 0.334345615 |
| cg12526091 | 12 | 0.00939542 | 0.324355011 | 0.425890455 |
| cg24526843 | 6  | 0.00079669 | 0.34716264  | 0.448690456 |
| cg03831289 | 5  | 0.02733362 | 0.119130953 | 0.220647828 |
| cg04198323 | 2  | 0.0182636  | 0.698233874 | 0.799747331 |
| cg22124368 | 6  | 0.00491641 | 0.668752489 | 0.770233304 |
| cg01799791 | 17 | 0.00045549 | 0.413864299 | 0.515290257 |
| cg16826307 | 12 | 0.02961785 | 0.190464531 | 0.291875984 |
| cg21885361 | 7  | 0.00339608 | 0.23248116  | 0.333791144 |
| cg27525438 | 4  | 0.01197843 | 0.662775606 | 0.764065919 |
| cg27089559 | 6  | 0.02811542 | 0.109447463 | 0.210666274 |

|            |    |            |             |             |
|------------|----|------------|-------------|-------------|
| cg20012848 | 12 | 0.00051268 | 0.679728723 | 0.780929395 |
| cg16510460 | 3  | 0.00422239 | 0.190631646 | 0.291832087 |
| cg10272731 | 16 | 0.00431071 | 0.691355332 | 0.79255288  |
| cg05119686 | 10 | 0.0211602  | 0.169850381 | 0.271021783 |
| cg10816543 | 2  | 0.0494505  | 0.699647091 | 0.800709937 |
| cg18855429 | 10 | 0.03956393 | 0.444781252 | 0.545841211 |
| cg09289820 | 6  | 0.03428043 | 0.54578092  | 0.646826688 |
| cg14107822 | 6  | 0.03370891 | 0.587343108 | 0.688369652 |
| cg18809274 | 6  | 0.00235117 | 0.514321299 | 0.615336725 |
| cg13420627 | 9  | 0.02600333 | 0.47586799  | 0.576855439 |
| cg12811617 | 14 | 0.02710962 | 0.182300395 | 0.283243075 |
| cg15365426 | 2  | 0.0015888  | 0.173605662 | 0.274507769 |
| cg20847228 | 3  | 0.00047842 | 0.440204419 | 0.541088188 |
| cg21893358 | 11 | 0.00104813 | 0.126592877 | 0.227417404 |
| cg01976921 | 8  | 0.02106131 | 0.413911091 | 0.514693838 |
| cg13166942 | 14 | 0.04852602 | 0.220665859 | 0.32141717  |
| cg22479161 | 5  | 0.00994794 | 0.419146862 | 0.519883854 |
| cg08595433 | 7  | 0.00643299 | 0.143024828 | 0.243756086 |
| cg17045044 | 17 | 0.00046    | 0.25160221  | 0.352294013 |
| cg09021225 | 1  | 0.04002243 | 0.180798852 | 0.281457752 |
| cg17156694 | 7  | 0.00958952 | 0.816949554 | 0.917601436 |
| cg06903656 | 20 | 0.02136838 | 0.125736697 | 0.226374986 |
| cg12491643 | 15 | 0.00158423 | 0.173725816 | 0.274311416 |
| cg11650298 | 13 | 0.0305631  | 0.301176953 | 0.401750634 |
| cg17372047 | 19 | 0.01178598 | 0.621055223 | 0.721626525 |
| cg14651936 | 9  | 0.00833362 | 0.419224661 | 0.519789372 |
| cg27352123 | 5  | 0.00496841 | 0.688613507 | 0.789154801 |
| cg14283978 | 19 | 0.01247713 | 0.198713698 | 0.299247403 |
| cg09374673 | 8  | 0.0059431  | 0.176338619 | 0.276868384 |
| cg25898963 | 22 | 0.02498457 | 0.537425072 | 0.637946733 |
| cg22058452 | 2  | 0.01981286 | 0.224662971 | 0.325156599 |
| cg12854815 | 6  | 0.01780941 | 0.420144786 | 0.520609406 |
| cg27392395 | 8  | 0.01864316 | 0.714939223 | 0.815338277 |
| cg08848154 | 10 | 0.00140786 | 0.689941443 | 0.790337152 |
| cg00022262 | 12 | 0.00283395 | 0.446720531 | 0.547110273 |
| cg06489606 | 17 | 0.00062239 | 0.237600908 | 0.337988095 |
| cg14415544 | 9  | 0.02466085 | 0.443316778 | 0.543679538 |
| cg07029201 | 16 | 0.04892201 | 0.663965829 | 0.764317959 |
| cg02484774 | 19 | 0.00352746 | 0.514161245 | 0.614379295 |
| cg10758369 | 1  | 0.00990146 | 0.14425299  | 0.244467983 |
| cg03611551 | 11 | 0.03956135 | 0.256009639 | 0.356198186 |
| cg19254282 | 10 | 0.00033097 | 0.223677614 | 0.32384973  |
| cg27250607 | 16 | 0.00696292 | 0.711854373 | 0.811941946 |
| cg10978034 | 6  | 0.00200411 | 0.129140431 | 0.229227022 |
| cg14229071 | 15 | 0.01018598 | 0.664013534 | 0.764091961 |
| cg21032564 | 15 | 0.00199647 | 0.628869305 | 0.728929775 |

|            |    |            |             |             |
|------------|----|------------|-------------|-------------|
| cg19245980 | 3  | 0.01331285 | 0.576417684 | 0.676474945 |
| cg07175255 | 10 | 0.01399937 | 0.48268559  | 0.582729223 |
| cg23067090 | 15 | 0.04194059 | 0.105637121 | 0.205673579 |
| cg04920214 | 16 | 0.03005318 | 0.751870336 | 0.851879447 |

## Hypomethylated in OA hip cluster 2

| Delta Beta | Probe      | Gene             | CHR | adj.P-val  | Mean $\beta$ -value<br>OA hip cluster 1 |
|------------|------------|------------------|-----|------------|-----------------------------------------|
| -0.1477149 | cg02909809 | A2BP1;A2BP1      | 16  | 0.00817732 | 0.428347581                             |
| -0.1022096 | cg00962147 | A2BP1;A2BP1      | 16  | 0.0280502  | 0.730149527                             |
| -0.168332  | cg07196505 | A2BP1;A2BP1      | 16  | 0.01811247 | 0.786559987                             |
| -0.1070992 | cg00134295 | A2M              | 12  | 0.01268153 | 0.68803709                              |
| -0.215461  | cg09866565 | A4GNT            | 3   | 0.00133618 | 0.535532003                             |
| -0.1416081 | cg02766259 | AACS             | 12  | 0.01246667 | 0.791561454                             |
| -0.1547797 | cg03228145 | AACSL            | 5   | 0.03807561 | 0.831812158                             |
| -0.2781852 | cg22396850 | AARSD1;AARSD1    | 17  | 5.04E-05   | 0.259898473                             |
| -0.1250506 | cg04100956 | ABCA4            | 1   | 0.01530062 | 0.73735127                              |
| -0.1449377 | cg22081096 | ABCA6;ABCA6      | 17  | 0.02825454 | 0.646902364                             |
| -0.1904153 | cg25477497 | ABCB1            | 7   | 0.0132403  | 0.807546284                             |
| -0.1671137 | cg07861968 | ABCC12;ABCC12    | 16  | 0.00354859 | 0.809330967                             |
| -0.1366424 | cg27222669 | ABCC3;ABCC3      | 17  | 0.04678037 | 0.752818431                             |
| -0.1473902 | cg25928474 | ABCC3;ABCC3      | 17  | 0.0153099  | 0.806815547                             |
| -0.2479078 | cg24260135 | ABCC8            | 11  | 0.0249264  | 0.707634048                             |
| -0.1636844 | cg05878073 | ABCD4;ABCD4      | 14  | 0.00638264 | 0.368099386                             |
| -0.1383721 | cg02316713 | ABCG1;ABCG1      | 21  | 0.01679201 | 0.734973742                             |
| -0.2204979 | cg21052932 | ABHD12B;ABHD12B  | 14  | 0.00262542 | 0.576304967                             |
| -0.1496662 | cg25616535 | ABI3;ABI3        | 17  | 0.01890416 | 0.494098205                             |
| -0.1029865 | cg05716556 | ABI3;GNGT2;GNGT2 | 17  | 0.00127637 | 0.644396967                             |
| -0.1186726 | cg26334023 | ABI3;GNGT2;GNGT2 | 17  | 0.00399707 | 0.6704805                               |
| -0.1842051 | cg03471346 | ABL2;ABL2;ABL2   | 1   | 0.0096831  | 0.832083499                             |
| -0.1111747 | cg17056676 | ABLIM1;ABLIM1    | 10  | 0.01729189 | 0.447262321                             |
| -0.1134212 | cg19676285 | ABLIM2;ABLIM2    | 4   | 0.00235626 | 0.58695197                              |
| -0.1054203 | cg22301854 | ABLIM2;ABLIM2    | 4   | 0.0018804  | 0.24062444                              |
| -0.1157043 | cg10754215 | ABLIM2;ABLIM2    | 4   | 0.00089244 | 0.629859689                             |
| -0.1002141 | cg00245502 | ABLIM3           | 5   | 0.00518495 | 0.515234849                             |
| -0.1131679 | cg14909495 | ABP1             | 7   | 0.0009415  | 0.298641204                             |
| -0.2048247 | cg15939920 | ACACA;ACACA      | 17  | 0.03211239 | 0.874690137                             |
| -0.1950595 | cg13925686 | ACAP1            | 17  | 0.0327311  | 0.690396832                             |
| -0.1772928 | cg11807006 | ACAP1            | 17  | 0.00648924 | 0.46542538                              |
| -0.1313432 | cg04114655 | ACCN4;ACCN4      | 2   | 0.03108577 | 0.489458066                             |
| -0.1279763 | cg15736994 | ACCN5            | 4   | 0.04525073 | 0.607815531                             |
| -0.2147586 | cg16587010 | ACOX2            | 3   | 0.02660761 | 0.625063274                             |
| -0.183306  | cg09636163 | ACOXL;ACOXL      | 2   | 0.00844488 | 0.446456067                             |
| -0.1467771 | cg24187645 | ACPL2;ACPL2      | 3   | 0.01035202 | 0.507461888                             |
| -0.1372696 | cg24392132 | ACRBP            | 12  | 0.00074785 | 0.478025285                             |
| -0.1372078 | cg27571769 | ACSL1            | 4   | 0.01291519 | 0.653140898                             |
| -0.1363735 | cg18733757 | ACSL5;ACSL5      | 10  | 0.01445854 | 0.441651029                             |
| -0.1211709 | cg16066219 | ACSL5;ACSL5      | 10  | 0.02780461 | 0.671947975                             |

|            |            |             |    |            |             |
|------------|------------|-------------|----|------------|-------------|
| -0.1170912 | cg04844987 | ACSL5;ACSL5 | 10 | 0.00246976 | 0.482240294 |
| -0.113603  | cg10078415 | ACSM3;ACSM  | 16 | 0.01233404 | 0.336219841 |
| -0.1052053 | cg16736889 | ACSM5       | 16 | 0.02083556 | 0.75969625  |
| -0.130677  | cg17242351 | ACTC1       | 15 | 0.00409079 | 0.325929044 |
| -0.1256082 | cg03220543 | ACTL8       | 1  | 0.00125742 | 0.57108353  |
| -0.1106566 | cg04958055 | ACTN1;ACTN  | 14 | 0.03979675 | 0.806996019 |
| -0.1088466 | cg02057747 | ACTN1;ACTN  | 14 | 0.00153957 | 0.573762878 |
| -0.1183297 | cg26831416 | ACTN4       | 19 | 0.01698989 | 0.715047439 |
| -0.2343968 | cg07093324 | ACTR3       | 2  | 0.01110645 | 0.212701608 |
| -0.1755607 | cg15211996 | ACTRT2      | 1  | 0.02752584 | 0.681792095 |
| -0.148925  | cg23879118 | ACY3        | 11 | 0.02134278 | 0.721417037 |
| -0.1027959 | cg01240599 | ACY3        | 11 | 0.0080244  | 0.594478699 |
| -0.1689562 | cg25282715 | ADAM11      | 17 | 0.00231713 | 0.425019928 |
| -0.165806  | cg15342452 | ADAM12;AD   | 10 | 0.00879802 | 0.889742959 |
| -0.1564393 | cg01823925 | ADAM19      | 5  | 0.01557748 | 0.756471647 |
| -0.1211587 | cg08295410 | ADAM19      | 5  | 0.01723745 | 0.80566968  |
| -0.1184731 | cg10852045 | ADAM32      | 8  | 0.04734949 | 0.801815259 |
| -0.2205172 | cg01181233 | ADAMDEC1;A  | 8  | 0.0002374  | 0.360108546 |
| -0.1442884 | cg27015773 | ADAMTS10    | 19 | 0.03665776 | 0.725183922 |
| -0.136022  | cg05884870 | ADAMTS17    | 15 | 0.01204914 | 0.604583408 |
| -0.1043542 | cg09533145 | ADAMTS2     | 5  | 0.00706349 | 0.463404834 |
| -0.1302428 | cg14740657 | ADAMTS5     | 21 | 0.019371   | 0.614615693 |
| -0.1977222 | cg03294207 | ADAMTS5     | 21 | 0.0092796  | 0.749509717 |
| -0.1062281 | cg21033632 | ADAMTS6     | 5  | 0.03696248 | 0.625414455 |
| -0.2536214 | cg16714091 | ADAMTSL1;A  | 9  | 0.01010307 | 0.775667294 |
| -0.2184249 | cg22731190 | ADAMTSL2;A  | 9  | 0.00965573 | 0.558993215 |
| -0.1583752 | cg27572072 | ADAP1       | 7  | 0.04566199 | 0.493144255 |
| -0.1316996 | cg09537553 | ADAP1       | 7  | 0.00850956 | 0.769899615 |
| -0.2474724 | cg02006134 | ADAP1       | 7  | 0.00049241 | 0.478043558 |
| -0.1733849 | cg02123534 | ADAP1       | 7  | 0.02435557 | 0.736912045 |
| -0.16744   | cg03754605 | ADARB2      | 10 | 0.00540201 | 0.862065355 |
| -0.1652453 | cg20151301 | ADARB2      | 10 | 0.02151372 | 0.732244403 |
| -0.1519998 | cg17861863 | ADARB2      | 10 | 0.01392564 | 0.781081942 |
| -0.1442754 | cg15570021 | ADARB2      | 10 | 0.04017806 | 0.871021088 |
| -0.1388533 | cg27429195 | ADARB2      | 10 | 0.00021667 | 0.30806778  |
| -0.1103564 | cg07308975 | ADARB2      | 10 | 0.00720342 | 0.508968628 |
| -0.1026556 | cg08971562 | ADARB2      | 10 | 0.00352246 | 0.376496013 |
| -0.1460937 | cg27336068 | ADARB2      | 10 | 0.00158247 | 0.766613413 |
| -0.1074955 | cg04012681 | ADARB2      | 10 | 0.000517   | 0.611729415 |
| -0.1324266 | cg23099319 | ADARB2      | 10 | 0.00370689 | 0.401357119 |
| -0.1246079 | cg02887530 | ADARB2      | 10 | 0.000644   | 0.471134707 |
| -0.1185525 | cg07162000 | ADARB2      | 10 | 0.01538294 | 0.745050094 |
| -0.2137782 | cg11343713 | ADCY1       | 7  | 0.0024682  | 0.578536717 |
| -0.1067414 | cg15680973 | ADCY2       | 5  | 0.0478297  | 0.652925125 |
| -0.1072246 | cg03485674 | ADCY7       | 16 | 0.01269486 | 0.719714102 |
| -0.1116672 | cg16548911 | ADCY7       | 16 | 0.04710967 | 0.821898829 |



|            |            |            |    |            |             |
|------------|------------|------------|----|------------|-------------|
| -0.1365066 | cg10341242 | ADCY7      | 16 | 0.01659684 | 0.817213579 |
| -0.1729557 | cg07644321 | ADD1;ADD1; | 4  | 0.01400724 | 0.67320452  |
| -0.1419445 | cg18994606 | ADD3;ADD3; | 10 | 0.04067782 | 0.826248963 |
| -0.1222803 | cg12011299 | ADH4       | 4  | 0.00285274 | 0.595640417 |
| -0.1121334 | cg07911953 | ADK;ADK    | 10 | 0.00273937 | 0.264655777 |
| -0.1442149 | cg02181247 | ADM        | 11 | 0.00749117 | 0.319484243 |
| -0.2169265 | cg17127015 | ADPGK;ADPC | 15 | 0.00242367 | 0.904868464 |
| -0.1208856 | cg26389958 | ADPRHL1;AD | 13 | 0.02280539 | 0.826537913 |
| -0.1361182 | cg23328194 | ADRA1A;ADF | 8  | 0.00700527 | 0.563642808 |
| -0.1316325 | cg17979970 | ADRA1B     | 5  | 0.00776571 | 0.632031391 |
| -0.1146284 | cg23497683 | AFF3       | 2  | 0.02265478 | 0.739624516 |
| -0.1117606 | cg09976051 | AGA        | 4  | 0.03826471 | 0.835653532 |
| -0.1271208 | cg26521139 | AGAP1;AGAF | 2  | 0.01678934 | 0.628009797 |
| -0.2451932 | cg09973986 | AGAP2      | 12 | 0.01684615 | 0.410137723 |
| -0.1358083 | cg10932874 | AGAP2      | 12 | 0.00226672 | 0.25626754  |
| -0.1035125 | cg22505898 | AGAP2      | 12 | 0.01836976 | 0.630955678 |
| -0.1339644 | cg22199080 | AGAP2      | 12 | 0.00116285 | 0.349129731 |
| -0.1040756 | cg21351392 | AGPAT4     | 6  | 0.02515593 | 0.806553579 |
| -0.1436503 | cg14252395 | AGRN       | 1  | 0.02010938 | 0.682776979 |
| -0.1326486 | cg24371033 | AGXT       | 2  | 0.00144944 | 0.271782491 |
| -0.1297088 | cg03822873 | AHCYL2;AHC | 7  | 0.00220544 | 0.729030694 |
| -0.1284989 | cg25272143 | AHNAK      | 11 | 0.00574229 | 0.293354551 |
| -0.1075952 | cg16509239 | AHNAK      | 11 | 0.02700779 | 0.376142541 |
| -0.2106024 | cg06799735 | AHNAK2     | 14 | 0.03677381 | 0.584597817 |
| -0.187846  | cg13534901 | AHR        | 7  | 0.00146331 | 0.393316621 |
| -0.1806916 | cg11902777 | AHRR       | 5  | 0.00138064 | 0.336530398 |
| -0.1464641 | cg23916896 | AHRR       | 5  | 0.00171914 | 0.739302351 |
| -0.162052  | cg07195224 | AIM2       | 1  | 0.03810414 | 0.560392314 |
| -0.1392813 | cg00490406 | AIM2       | 1  | 0.03467725 | 0.836232016 |
| -0.1073057 | cg21747271 | AIP        | 11 | 0.00941718 | 0.41774101  |
| -0.1196271 | cg21052656 | AIP        | 11 | 0.00235878 | 0.566750891 |
| -0.109295  | cg12065943 | AKAP10     | 17 | 0.01354908 | 0.392182957 |
| -0.1909665 | cg14003853 | AKAP13;AKA | 15 | 0.03772015 | 0.543726847 |
| -0.1836839 | cg05254518 | AKAP13;AKA | 15 | 0.00103823 | 0.593300943 |
| -0.1053892 | cg11496569 | AKT3;AKT3  | 1  | 0.03972577 | 0.710982311 |
| -0.147722  | cg11314684 | AKT3;AKT3  | 1  | 0.01183749 | 0.619361529 |
| -0.1311524 | cg04329347 | ALDOA      | 16 | 0.01398739 | 0.564635194 |
| -0.1071072 | cg06400255 | ALDOA      | 16 | 0.00937644 | 0.82008881  |
| -0.1552311 | cg19600442 | ALG1L2     | 3  | 0.0029927  | 0.72993237  |
| -0.2095174 | cg18780653 | ALG1L2     | 3  | 0.00158247 | 0.440007204 |
| -0.1079642 | cg20954219 | ALK        | 2  | 0.00040855 | 0.454373279 |
| -0.1217513 | cg05977776 | ALLC       | 2  | 0.00200375 | 0.664944486 |
| -0.1514414 | cg01307555 | ALMS1P     | 2  | 0.0295834  | 0.516180387 |
| -0.127327  | cg03528016 | ALMS1P     | 2  | 0.00276598 | 0.645220708 |
| -0.1098437 | cg06835483 | ALOX12B    | 17 | 0.01145764 | 0.28866266  |
| -0.1085121 | cg15834952 | ALOX12P2   | 17 | 0.01361819 | 0.473281452 |

|            |            |             |    |            |             |
|------------|------------|-------------|----|------------|-------------|
| -0.1264906 | cg20103124 | ALOX5AP     | 13 | 0.01156455 | 0.559448303 |
| -0.2390025 | cg13306478 | ALOX5AP     | 13 | 0.01181766 | 0.661673036 |
| -0.1877441 | cg24722348 | ALPL;ALPL   | 1  | 0.02146969 | 0.517605207 |
| -0.1701919 | cg12466599 | ALPL;ALPL   | 1  | 0.00681997 | 0.709910508 |
| -0.1365138 | cg16413687 | ALX1        | 12 | 0.00637228 | 0.704707106 |
| -0.1192867 | cg03781931 | ALX1        | 12 | 0.00090542 | 0.533934919 |
| -0.1079883 | cg06809252 | ALX3        | 1  | 0.01415886 | 0.559156641 |
| -0.1032115 | cg15522957 | ALX4        | 11 | 0.00459962 | 0.564463408 |
| -0.1842345 | cg16360777 | AMBN        | 4  | 3.75E-05   | 0.374212548 |
| -0.1249961 | cg13003878 | AMBP        | 9  | 0.01322842 | 0.776232345 |
| -0.1231832 | cg20090290 | AMBRA1      | 11 | 0.02132239 | 0.84207862  |
| -0.1044918 | cg27137887 | AMBRA1      | 11 | 0.00031883 | 0.510963504 |
| -0.100193  | cg24374161 | AMBRA1      | 11 | 0.00104745 | 0.501573304 |
| -0.142357  | cg26921482 | AMDHD2;AM   | 16 | 0.03025158 | 0.430428063 |
| -0.127203  | cg15794034 | AMICA1;AMI  | 11 | 0.00438507 | 0.406377792 |
| -0.1229487 | cg13751113 | AMICA1;AMI  | 11 | 0.01142456 | 0.641876879 |
| -0.1191142 | cg07376232 | AMICA1;AMI  | 11 | 0.01060618 | 0.653054905 |
| -0.1039633 | cg24552844 | AMICA1;AMI  | 11 | 0.02481956 | 0.546178253 |
| -0.1474151 | cg11936554 | AMMECR1L    | 2  | 0.01160595 | 0.88685076  |
| -0.1343254 | cg25968076 | AMPD3;AMP   | 11 | 0.01240505 | 0.542295204 |
| -0.1183346 | cg23092449 | AMPH;AMPH   | 7  | 0.00313488 | 0.420526191 |
| -0.1032068 | cg21823502 | ANAPC11;AN  | 17 | 0.02181711 | 0.749869267 |
| -0.1342525 | cg09396217 | ANGPT1      | 8  | 0.01377297 | 0.540268693 |
| -0.1100108 | cg27616227 | ANGPT1      | 8  | 0.00044757 | 0.624885765 |
| -0.1097105 | cg03245734 | ANGPT1;ANC  | 8  | 0.00171787 | 0.226362015 |
| -0.1089035 | cg02402368 | ANGPT2;ANC  | 8  | 0.00207283 | 0.29293694  |
| -0.1652387 | cg08521995 | ANK1;ANK1;J | 8  | 0.00282121 | 0.522444776 |
| -0.1219192 | cg02060584 | ANK2;ANK2;J | 4  | 0.00974657 | 0.227567733 |
| -0.1053664 | cg22164298 | ANK2;ANK2;J | 4  | 0.0422602  | 0.857292094 |
| -0.1171338 | cg26110900 | ANK3        | 10 | 0.02601017 | 0.734667215 |
| -0.1029481 | cg05093576 | ANKFN1      | 17 | 0.04799362 | 0.693611174 |
| -0.185324  | cg16671421 | ANKHD1;ANK  | 5  | 0.04268145 | 0.717242379 |
| -0.1108475 | cg23075597 | ANKLE2      | 12 | 0.01559161 | 0.923201641 |
| -0.1600943 | cg24065504 | ANKRD22     | 10 | 0.00603201 | 0.563872852 |
| -0.1123546 | cg15701085 | ANKRD24     | 19 | 0.01002355 | 0.483522018 |
| -0.1100664 | cg01442620 | ANKRD27     | 19 | 0.02622614 | 0.644491808 |
| -0.2107025 | cg04278110 | ANKRD44     | 2  | 0.03314207 | 0.596459457 |
| -0.1765747 | cg16411361 | ANKRD44     | 2  | 0.02052516 | 0.770797504 |
| -0.1396977 | cg13941760 | ANKRD44     | 2  | 0.00650129 | 0.640401168 |
| -0.1917367 | cg04739880 | ANKS1A      | 6  | 0.04027396 | 0.594101716 |
| -0.1821696 | cg00794673 | ANKS1A      | 6  | 0.00272111 | 0.706409396 |
| -0.1448777 | cg07638857 | ANKS1B;ANK  | 12 | 0.03497117 | 0.70667265  |
| -0.1266263 | cg10075976 | ANKS1B;ANK  | 12 | 0.03449503 | 0.267689457 |
| -0.1048783 | cg03501666 | ANKS1B;ANK  | 12 | 0.01817928 | 0.383341994 |
| -0.1024934 | cg26401673 | ANO10       | 3  | 0.00176668 | 0.82093049  |
| -0.1004001 | cg20959403 | ANO4        | 12 | 0.02908073 | 0.60084961  |

|            |            |             |    |            |             |
|------------|------------|-------------|----|------------|-------------|
| -0.1818792 | cg02278646 | ANO6;ANO6;  | 12 | 0.00661577 | 0.633877529 |
| -0.2157974 | cg00381789 | ANO9        | 11 | 0.01459967 | 0.839997791 |
| -0.1911619 | cg23258615 | ANXA11;ANX  | 10 | 0.00507301 | 0.718572847 |
| -0.1090042 | cg20366110 | ANXA13;ANX  | 8  | 0.00816936 | 0.643401547 |
| -0.1392895 | cg19130824 | ANXA5       | 4  | 0.00681997 | 0.758210747 |
| -0.1103244 | cg05999993 | AOAH        | 7  | 0.02218364 | 0.51393739  |
| -0.1584473 | cg02415661 | AP1M1;AP1M  | 19 | 0.01189755 | 0.643984775 |
| -0.1503616 | cg11100795 | AP3B1       | 5  | 0.03786012 | 0.46154774  |
| -0.1213365 | cg19175742 | AP3B2       | 15 | 0.03160783 | 0.557382627 |
| -0.1046743 | cg02349866 | AP3S2;AP3S2 | 15 | 0.00330367 | 0.760688959 |
| -0.1681617 | cg18385440 | APBA2;APBA  | 15 | 0.00429258 | 0.434950133 |
| -0.1878339 | cg08908089 | APBA2;APBA  | 15 | 0.00602405 | 0.61684999  |
| -0.1041475 | cg06457633 | APBB1IP     | 10 | 0.00333269 | 0.740649349 |
| -0.1266975 | cg06970472 | APBB2;APBB  | 4  | 0.00040622 | 0.341979446 |
| -0.119473  | cg14290210 | APBB2;APBB  | 4  | 0.00676378 | 0.805635049 |
| -0.1172116 | cg00074348 | APLNR;APLN  | 11 | 0.00398275 | 0.576875295 |
| -0.1343817 | cg25354657 | APLP2;APLP2 | 11 | 0.02057369 | 0.803324471 |
| -0.1279658 | cg23729763 | APLP2;APLP2 | 11 | 0.00391106 | 0.563689831 |
| -0.1327641 | cg16332159 | APOB48R     | 16 | 0.00603619 | 0.588973817 |
| -0.1098992 | cg08923160 | APOB48R     | 16 | 0.00916622 | 0.779318709 |
| -0.1013397 | cg24360617 | APOBEC3A    | 22 | 0.00156014 | 0.38694936  |
| -0.1340303 | cg10316474 | APOBEC3C    | 22 | 0.00034236 | 0.255125138 |
| -0.1337517 | cg16066354 | APOBEC3D;A  | 22 | 0.00134623 | 0.2926506   |
| -0.1121915 | cg09135399 | APOBEC3H;A  | 22 | 0.00384448 | 0.452180764 |
| -0.1217853 | cg11911305 | APOC1P1;AP  | 19 | 0.01441953 | 0.60235098  |
| -0.1111466 | cg08415592 | APOL1;APOL  | 22 | 0.04747953 | 0.712064591 |
| -0.1739955 | cg07713361 | APOL1;APOL  | 22 | 0.00778787 | 0.327919119 |
| -0.1645975 | cg26758857 | APOL1;APOL  | 22 | 0.00023669 | 0.341129723 |
| -0.1419432 | cg15245051 | APOL3;APOL  | 22 | 0.02166115 | 0.648513275 |
| -0.1360125 | cg14690065 | APOL6       | 22 | 0.02464817 | 0.568344606 |
| -0.1135765 | cg09432376 | APOL6       | 22 | 0.01163152 | 0.662242594 |
| -0.1286737 | cg05963604 | APPL1       | 3  | 0.01824538 | 0.346463373 |
| -0.1553057 | cg20176648 | AQP1        | 7  | 0.00032114 | 0.393857758 |
| -0.1307969 | cg26923410 | AQP1        | 7  | 0.00140376 | 0.330473289 |
| -0.1044306 | cg00622010 | AQP1        | 7  | 0.00022303 | 0.668160475 |
| -0.1054589 | cg07135629 | AQP1        | 7  | 0.00392583 | 0.786753272 |
| -0.1044606 | cg10132917 | AQP1        | 7  | 0.01121458 | 0.769774631 |
| -0.1879161 | cg09676669 | AQP1        | 7  | 0.00010292 | 0.396400724 |
| -0.1105473 | cg15373767 | AQP1        | 7  | 0.00055599 | 0.4764332   |
| -0.1077935 | cg18307978 | AQP1        | 7  | 0.0002722  | 0.691957601 |
| -0.1133488 | cg25230363 | AQP1        | 7  | 0.00239252 | 0.60785544  |
| -0.1092452 | cg25075794 | AQP1        | 7  | 0.00107488 | 0.654905906 |
| -0.1572105 | cg04372674 | AQP1        | 7  | 0.00132594 | 0.641007591 |
| -0.12595   | cg18080604 | AQP1;AQP1   | 7  | 0.00091639 | 0.341683314 |
| -0.1545604 | cg11827925 | AQP1;AQP1   | 7  | 0.00399567 | 0.57716682  |
| -0.2387713 | cg12153755 | ARAP3       | 5  | 0.00398525 | 0.846345601 |

|            |            |             |    |            |             |
|------------|------------|-------------|----|------------|-------------|
| -0.124603  | cg00069642 | ARAP3       | 5  | 0.00795469 | 0.775400312 |
| -0.1031592 | cg27006721 | ARHGAP22    | 10 | 0.00191197 | 0.612804748 |
| -0.1342184 | cg13889934 | ARHGAP24;A  | 4  | 6.33E-05   | 0.285164476 |
| -0.2410546 | cg21446955 | ARHGAP24;A  | 4  | 5.88E-05   | 0.255497461 |
| -0.1933366 | cg12093662 | ARHGAP25;A  | 2  | 0.00695241 | 0.686027994 |
| -0.1963403 | cg26238936 | ARHGAP25;A  | 2  | 0.01537454 | 0.810808835 |
| -0.1363181 | cg15477363 | ARHGAP25;A  | 2  | 0.02176255 | 0.835798902 |
| -0.1201669 | cg05395210 | ARHGAP25;A  | 2  | 0.03262941 | 0.734279943 |
| -0.1193939 | cg15361661 | ARHGAP25;A  | 2  | 0.00852227 | 0.639593376 |
| -0.1160647 | cg13339825 | ARHGAP25;A  | 2  | 0.01987144 | 0.67761751  |
| -0.104443  | cg08991742 | ARHGAP25;A  | 2  | 0.0171651  | 0.737171355 |
| -0.1113631 | cg25070482 | ARHGAP25;A  | 2  | 0.00631667 | 0.475529612 |
| -0.1291507 | cg14555350 | ARHGAP26;A  | 5  | 0.02137739 | 0.824109668 |
| -0.1264284 | cg05185926 | ARHGAP26;A  | 5  | 0.00571958 | 0.501135953 |
| -0.1234118 | cg22184990 | ARHGAP26;A  | 5  | 0.00145594 | 0.824440474 |
| -0.1009488 | cg07837534 | ARHGAP30;A  | 1  | 0.00315753 | 0.44632139  |
| -0.2393448 | cg00045607 | ARHGAP30;A  | 1  | 0.00448571 | 0.703389235 |
| -0.2161449 | cg03089651 | ARHGAP30;A  | 1  | 0.00668256 | 0.720137017 |
| -0.1686135 | cg06395232 | ARHGDIB     | 12 | 0.00813856 | 0.845686967 |
| -0.1683374 | cg22614759 | ARHGDIB     | 12 | 0.02269745 | 0.809282454 |
| -0.141275  | cg15450139 | ARHGDIB     | 12 | 0.0149212  | 0.759631343 |
| -0.1376347 | cg20917083 | ARHGDIB     | 12 | 0.00124399 | 0.444252115 |
| -0.1350955 | cg02428506 | ARHGDIG;PD  | 16 | 0.0159888  | 0.71003748  |
| -0.132664  | cg11806633 | ARHGEF10L   | 1  | 0.02901355 | 0.752367019 |
| -0.1231141 | cg22524332 | ARHGEF10L;A | 1  | 0.03838496 | 0.678276358 |
| -0.1064351 | cg07233343 | ARHGEF10L;A | 1  | 0.03664769 | 0.620997858 |
| -0.1764564 | cg15269721 | ARHGEF15    | 17 | 0.00751159 | 0.376404426 |
| -0.1708868 | cg02731917 | ARHGEF16    | 1  | 0.04305445 | 0.803502415 |
| -0.1363901 | cg15496388 | ARHGEF2;AR  | 1  | 0.00630778 | 0.485340916 |
| -0.1081722 | cg11229273 | ARHGEF3     | 3  | 0.01167409 | 0.339203555 |
| -0.1078328 | cg21077300 | ARHGEF3;AR  | 3  | 0.00472755 | 0.357025486 |
| -0.1219683 | cg25799109 | ARHGEF3;SP  | 3  | 0.01258965 | 0.276505343 |
| -0.1574662 | cg14446494 | ARHGEF4;AR  | 2  | 0.01571387 | 0.694793345 |
| -0.1244762 | cg18754629 | ARHGEF4;AR  | 2  | 0.00031908 | 0.554589587 |
| -0.1216132 | cg18973247 | ARID1A;ARID | 1  | 0.00074287 | 0.255250621 |
| -0.1195548 | cg01774027 | ARID3A      | 19 | 0.03589883 | 0.861912546 |
| -0.1144108 | cg24495062 | ARID5B      | 10 | 0.04756314 | 0.579350675 |
| -0.1063728 | cg18522931 | ARID5B      | 10 | 0.03122271 | 0.755849028 |
| -0.1378969 | cg11287647 | ARL4A;ARL4A | 7  | 0.02467791 | 0.483394482 |
| -0.1248418 | cg15016771 | ARL4C;ARL4C | 2  | 0.00015312 | 0.317437828 |
| -0.1653627 | cg05204104 | ARL4C;ARL4C | 2  | 0.01173077 | 0.685212372 |
| -0.1131329 | cg06795960 | ARL4D       | 17 | 0.01145764 | 0.706514339 |
| -0.2112745 | cg10721492 | ARL8B       | 3  | 0.0303962  | 0.398331046 |
| -0.1966807 | cg04642300 | ARMC2       | 6  | 0.00542557 | 0.453725942 |
| -0.1190232 | cg20057782 | ARMC4       | 10 | 0.03387083 | 0.362361637 |
| -0.1072568 | cg19708986 | ARNT2       | 15 | 0.000522   | 0.697570115 |

|            |            |             |    |            |             |
|------------|------------|-------------|----|------------|-------------|
| -0.1048529 | cg21756647 | ARRB1;ARRB  | 11 | 0.01197221 | 0.480881058 |
| -0.1084426 | cg14135809 | ARRDC1      | 9  | 0.01345401 | 0.743798168 |
| -0.103852  | cg23482747 | ARRDC2      | 19 | 0.00275887 | 0.738458783 |
| -0.1082576 | cg00970435 | ARSG        | 17 | 0.00188756 | 0.544013659 |
| -0.1829598 | cg17918314 | ARTN;ARTN;  | 1  | 0.00048139 | 0.473410061 |
| -0.118364  | cg26038514 | ASAP1       | 8  | 0.01648282 | 0.765653527 |
| -0.1143275 | cg19426625 | ASAP2;ASAP2 | 2  | 0.02116614 | 0.790762891 |
| -0.1461755 | cg23902076 | ASAP2;ASAP2 | 2  | 0.02698902 | 0.786307298 |
| -0.1244861 | cg00013804 | ASAP2;ASAP2 | 2  | 0.00598235 | 0.793176247 |
| -0.1099475 | cg17056069 | ASAP2;ASAP2 | 2  | 0.03681101 | 0.850044603 |
| -0.1637289 | cg18008487 | ASB4;ASB4   | 7  | 0.02636266 | 0.599562616 |
| -0.1243465 | cg14089110 | ASGR2;ASGR  | 17 | 0.006233   | 0.323995759 |
| -0.156984  | cg14516287 | ASTN2;ASTN2 | 9  | 0.01750122 | 0.624460235 |
| -0.1408305 | cg13798621 | ATAD3C      | 1  | 0.01124629 | 0.375334502 |
| -0.1124342 | cg07676329 | ATCAY       | 19 | 0.00217729 | 0.41762809  |
| -0.1576226 | cg10985914 | ATF3        | 1  | 0.01126334 | 0.630713112 |
| -0.1496208 | cg17519280 | ATG12       | 5  | 0.01274795 | 0.280711292 |
| -0.1454618 | cg00458449 | ATG4B;ATG4  | 2  | 0.00103052 | 0.808097048 |
| -0.1796492 | cg22683036 | ATG4C;ATG4  | 1  | 0.01268602 | 0.324533609 |
| -0.1071745 | cg06366791 | ATG4C;ATG4  | 1  | 0.00127243 | 0.255353269 |
| -0.3173366 | cg24082680 | ATG4C;ATG4  | 1  | 0.00839965 | 0.348558042 |
| -0.1381877 | cg12120750 | ATG7;ATG7;  | 3  | 0.00771692 | 0.707880962 |
| -0.1415165 | cg14761454 | ATM;NPAT    | 11 | 0.0025909  | 0.346767758 |
| -0.1670133 | cg13629358 | ATP10B      | 5  | 0.00146982 | 0.431324974 |
| -0.140253  | cg07343790 | ATP11A;ATP1 | 13 | 0.03172286 | 0.686021757 |
| -0.1289358 | cg06956052 | ATP1A4      | 1  | 0.00467735 | 0.428811206 |
| -0.116911  | cg17589633 | ATP2B4;ATP2 | 1  | 0.0194858  | 0.623856294 |
| -0.1547082 | cg05299486 | ATP6V0A1;A  | 17 | 0.00606967 | 0.57093894  |
| -0.1351503 | cg02460419 | ATP6V0A2    | 12 | 0.03034357 | 0.756727301 |
| -0.1294738 | cg27150460 | ATP6V0D1    | 16 | 0.01566558 | 0.522863422 |
| -0.1192424 | cg07871059 | ATP6V0D1;A  | 16 | 0.02583317 | 0.47134974  |
| -0.1771528 | cg00319692 | ATP6V0D2    | 8  | 0.00225599 | 0.736210325 |
| -0.1107828 | cg07554478 | ATP6V1A     | 3  | 0.02064104 | 0.734684029 |
| -0.1121427 | cg03107235 | ATP8A2      | 13 | 0.03248096 | 0.471210479 |
| -0.109111  | cg05868813 | ATP8A2      | 13 | 0.00082972 | 0.767762879 |
| -0.1009642 | cg12384004 | ATP8A2      | 13 | 0.0056887  | 0.722933868 |
| -0.1056331 | cg23671196 | ATP8B4      | 15 | 0.03618938 | 0.86248621  |
| -0.222743  | cg21380183 | ATP9A       | 20 | 0.03621558 | 0.585146947 |
| -0.1381513 | cg07339236 | ATP9A       | 20 | 0.00639795 | 0.820303826 |
| -0.1376064 | cg20663852 | ATP9A       | 20 | 0.01376677 | 0.51471629  |
| -0.1336669 | cg19344315 | ATXN1;ATXN  | 6  | 0.0023322  | 0.820136175 |
| -0.117245  | cg22274117 | ATXN1;ATXN  | 6  | 0.00271823 | 0.601269069 |
| -0.1252828 | cg07932199 | ATXN2       | 12 | 0.00162255 | 0.372623331 |
| -0.1022607 | cg00834988 | AUTS2;AUTS2 | 7  | 0.0181581  | 0.744504483 |
| -0.1245068 | cg21557473 | AUTS2;AUTS2 | 7  | 0.00787167 | 0.851500649 |
| -0.1046765 | cg04046364 | AVIL        | 12 | 0.00235249 | 0.310390205 |

|            |            |             |    |            |             |
|------------|------------|-------------|----|------------|-------------|
| -0.1403358 | cg06317209 | AVIL        | 12 | 0.02599949 | 0.653783937 |
| -0.1097699 | cg15610437 | AZU1        | 19 | 0.02017183 | 0.595643338 |
| -0.1737283 | cg10752406 | AZU1        | 19 | 0.0006373  | 0.484152763 |
| -0.1589918 | cg24123679 | AZU1        | 19 | 0.00232971 | 0.463912203 |
| -0.1432589 | cg26390598 | B3GALT5;B3G | 21 | 0.01058035 | 0.416657213 |
| -0.1160752 | cg08539737 | B3GAT1;B3G  | 11 | 0.0106425  | 0.833302878 |
| -0.1147244 | cg13567349 | B3GAT1;B3G  | 11 | 0.00353995 | 0.614337125 |
| -0.1413951 | cg24391854 | B3GAT1;B3G  | 11 | 0.008281   | 0.755504879 |
| -0.1134007 | cg22212839 | B3GAT1;B3G  | 11 | 0.01319677 | 0.566525081 |
| -0.1027661 | cg27121870 | B3GAT1;B3G  | 11 | 0.00183526 | 0.607905954 |
| -0.1554203 | cg19203115 | B4GALT6     | 18 | 0.02626132 | 0.360557362 |
| -0.137949  | cg17486314 | BACH2;BACH  | 6  | 0.00855321 | 0.51785212  |
| -0.1069561 | cg18477569 | BACH2;BACH  | 6  | 0.03109403 | 0.585633658 |
| -0.1049685 | cg01810575 | BAHCC1      | 17 | 0.01326417 | 0.639375889 |
| -0.1270463 | cg27551910 | BAIAP2;BAIA | 17 | 0.03186875 | 0.621797103 |
| -0.1247322 | cg13739640 | BAIAP2;BAIA | 17 | 0.01044404 | 0.859155477 |
| -0.1826659 | cg22902266 | BARX1       | 9  | 0.00010668 | 0.575864385 |
| -0.1425942 | cg14374754 | BARX1       | 9  | 0.00211565 | 0.631942479 |
| -0.2112764 | cg07355688 | BARX2       | 11 | 0.00164445 | 0.375484575 |
| -0.1195227 | cg11854007 | BASE        | 20 | 0.02464439 | 0.438299339 |
| -0.1191405 | cg16281534 | BASP1       | 5  | 0.0021132  | 0.709351152 |
| -0.1120383 | cg04536765 | BAT3;BAT3;B | 6  | 0.00756735 | 0.786646663 |
| -0.1245793 | cg21531300 | BATF;BATF   | 14 | 0.0234129  | 0.50991146  |
| -0.1071128 | cg04006266 | BBS1        | 11 | 0.01163766 | 0.278217774 |
| -0.2523044 | cg22161706 | BBS9;BBS9;B | 7  | 0.01821182 | 0.875385822 |
| -0.2439837 | cg10495683 | BCAR3       | 1  | 0.04272798 | 0.866053611 |
| -0.2221822 | cg19457909 | BCAS3;BCAS3 | 17 | 0.00338491 | 0.742216354 |
| -0.1931122 | cg24965479 | BCAS3;BCAS3 | 17 | 0.00299128 | 0.410130407 |
| -0.1724719 | cg22214889 | BCAS4;BCAS4 | 20 | 0.00048058 | 0.299631891 |
| -0.1723207 | cg16102247 | BCHE;BCHE   | 3  | 0.00318772 | 0.285024474 |
| -0.1718029 | cg24244747 | BCKDHB;BCK  | 6  | 0.00309783 | 0.792789523 |
| -0.1551315 | cg01636910 | BCL10       | 1  | 0.02250636 | 0.746050715 |
| -0.1392589 | cg00543073 | BCL11A;BCL1 | 2  | 0.00278777 | 0.783017518 |
| -0.1153908 | cg17753356 | BCL11A;BCL1 | 2  | 0.02315061 | 0.461947219 |
| -0.1125671 | cg17935536 | BCL11A;BCL1 | 2  | 0.01203623 | 0.682702618 |
| -0.1098732 | cg13758331 | BCL2L11;BCL | 2  | 0.00838334 | 0.459720196 |
| -0.1074544 | cg01175610 | BCL2L14;BCL | 12 | 0.01811247 | 0.872887226 |
| -0.1056908 | cg27087650 | BCL3        | 19 | 0.01441129 | 0.528027671 |
| -0.1460546 | cg10020892 | BCL9        | 1  | 0.03950551 | 0.577866323 |
| -0.1415493 | cg01544877 | BCLAF1;BCLA | 6  | 0.01685719 | 0.875036667 |
| -0.1292375 | cg24002907 | BCO2;BCO2   | 11 | 0.03228781 | 0.397615615 |
| -0.1238755 | cg18336365 | BCR;BCR     | 22 | 0.00207981 | 0.606962373 |
| -0.1150469 | cg00919591 | BCR;BCR     | 22 | 0.00054128 | 0.596150993 |
| -0.1080133 | cg06256596 | BEAN        | 16 | 0.00863859 | 0.515462703 |
| -0.1018526 | cg13521842 | BEGAIN      | 14 | 0.0057658  | 0.334709864 |
| -0.1763302 | cg12497190 | BEND6       | 6  | 0.00716837 | 0.238530603 |

|            |               |              |    |            |             |
|------------|---------------|--------------|----|------------|-------------|
| -0.1305037 | cg00658449    | BEYLA;BEYLA  | 8  | 0.03864486 | 0.430463044 |
| -0.2564184 | cg23729443    | BGLAP        | 1  | 0.00071142 | 0.412872778 |
| -0.1870701 | cg09996284    | BGLAP        | 1  | 0.00542179 | 0.644629018 |
| -0.1532335 | cg11519176    | BGLAP        | 1  | 0.00882101 | 0.740428115 |
| -0.1494745 | cg12342675    | BICC1        | 10 | 0.01018454 | 0.887144012 |
| -0.148249  | cg08466030    | BICC1        | 10 | 0.00076629 | 0.868180751 |
| -0.1298804 | cg22641201    | BICC1        | 10 | 0.01449636 | 0.422562645 |
| -0.1159236 | cg07690768    | BICD1;BICD1  | 12 | 0.00988383 | 0.845308116 |
| -0.1072461 | cg24890964    | BLCAP;BLCAF  | 20 | 0.00434474 | 0.641896162 |
| -0.1029846 | cg08901339    | BLNK;BLNK;B  | 10 | 0.0420878  | 0.575288033 |
| -0.1728759 | cg06685411    | BLVRA        | 7  | 0.01398655 | 0.454705218 |
| -0.124133  | cg07321467    | BMP3         | 4  | 0.04564918 | 0.495256336 |
| -0.1090965 | cg04937184    | BMP4;BMP4    | 14 | 0.00150232 | 0.483529655 |
| -0.1984092 | cg10413224    | BMPER        | 7  | 0.00780259 | 0.51638043  |
| -0.1027696 | cg09807875    | BMPER        | 7  | 0.03430299 | 0.38489048  |
| -0.1112758 | cg06941037    | BMPR1A       | 10 | 0.04343804 | 0.489857542 |
| -0.1920441 | cg06024391    | BPGM;BPGM    | 7  | 0.00476497 | 0.808190991 |
| -0.1184156 | cg02983911    | BPI          | 20 | 0.01098829 | 0.783375054 |
| -0.1318325 | cg26534847    | BPI          | 20 | 0.01060723 | 0.488196877 |
| -0.1018189 | cg16451371    | BPIL2        | 22 | 0.00548231 | 0.506892221 |
| -0.1899178 | cg02935097    | BRDT         | 1  | 0.04912491 | 0.796992013 |
| -0.100499  | cg16185457    | BRE;BRE;BRE  | 2  | 0.00982526 | 0.875541935 |
| -0.2859824 | cg17416644    | BRSK2        | 11 | 0.0414885  | 0.346825189 |
| -0.1611068 | cg18735473    | BRUNOL4;BR   | 18 | 0.02044136 | 0.47293943  |
| -0.1095197 | ch.21.551389R | BRWD1;BRW    | 21 | 0.01040392 | 0.154965749 |
| -0.1348084 | cg24375690    | BSPH1        | 19 | 0.00043465 | 0.568704105 |
| -0.1328392 | cg20092122    | BST2         | 19 | 0.0006858  | 0.289170993 |
| -0.1171268 | cg03505817    | BTBD7        | 14 | 0.01162334 | 0.818217023 |
| -0.1107635 | cg22198603    | BTBD9;BTBD9  | 6  | 0.01356927 | 0.772557803 |
| -0.101796  | cg01269795    | BTN3A3;BTN   | 6  | 0.0278622  | 0.763038826 |
| -0.1616439 | cg09514561    | BTNL2        | 6  | 0.03136777 | 0.423512584 |
| -0.1349214 | cg01882933    | BTNL9        | 5  | 0.0126551  | 0.587572436 |
| -0.1397533 | cg04337854    | BVES         | 6  | 0.01221135 | 0.658448107 |
| -0.1368707 | cg04764597    | C10orf107    | 10 | 0.00354612 | 0.44720276  |
| -0.1246693 | cg08754149    | C10orf11     | 10 | 0.01025043 | 0.819442814 |
| -0.1055462 | cg23499955    | C10orf128    | 10 | 0.00266876 | 0.663191586 |
| -0.1142238 | cg26686009    | C10orf25;ZNF | 10 | 0.03210503 | 0.487909033 |
| -0.2719276 | cg10548978    | C10orf27;C10 | 10 | 0.03000192 | 0.852793287 |
| -0.2296122 | cg03936104    | C10orf41;C10 | 10 | 0.00235633 | 0.60204864  |
| -0.2176071 | cg23282441    | C10orf54;CD  | 10 | 0.03116233 | 0.730191325 |
| -0.196399  | cg18861767    | C10orf58;C10 | 10 | 0.04136285 | 0.633823457 |
| -0.1946805 | cg10627429    | C10orf81     | 10 | 0.01493527 | 0.696729771 |
| -0.1619627 | cg11204562    | C10orf81     | 10 | 0.00490519 | 0.839988194 |
| -0.1542733 | cg23266598    | C10orf90     | 10 | 0.00071142 | 0.320691089 |
| -0.1516475 | cg14304336    | C10orf90     | 10 | 0.00168732 | 0.43832442  |
| -0.1497956 | cg04507071    | C10orf90     | 10 | 0.00994047 | 0.795962631 |

|            |            |               |    |            |             |
|------------|------------|---------------|----|------------|-------------|
| -0.1398016 | cg15834395 | C10orf91      | 10 | 0.00468127 | 0.595835321 |
| -0.1329279 | cg08720746 | C10orf93      | 10 | 0.04431906 | 0.591704141 |
| -0.1275006 | cg08273740 | C11orf21;TSF  | 11 | 0.03025608 | 0.745592062 |
| -0.1176421 | cg14510967 | C11orf21;TSF  | 11 | 0.03827303 | 0.794133947 |
| -0.1101594 | cg05509777 | C11orf21;TSF  | 11 | 0.00733558 | 0.560688147 |
| -0.1008459 | cg15818008 | C11orf34      | 11 | 0.00444773 | 0.649573874 |
| -0.1909568 | cg12490907 | C11orf41      | 11 | 0.00033097 | 0.653435803 |
| -0.1024899 | cg02636947 | C11orf53      | 11 | 0.00032077 | 0.51327613  |
| -0.2167685 | cg12895631 | C11orf75      | 11 | 0.03780444 | 0.765021421 |
| -0.1488361 | cg07188648 | C11orf88;C11  | 11 | 0.00106511 | 0.473637033 |
| -0.1612648 | cg15533046 | C12orf34      | 12 | 0.04002243 | 0.651266747 |
| -0.1370667 | cg02742775 | C12orf34      | 12 | 0.00399923 | 0.585067445 |
| -0.2003484 | cg12051956 | C12orf53      | 12 | 0.00689763 | 0.676526393 |
| -0.1153192 | cg03132202 | C12orf56;C12  | 12 | 0.00151625 | 0.439323188 |
| -0.1513995 | cg11649679 | C12orf72;C12  | 12 | 0.00063697 | 0.222659094 |
| -0.1385082 | cg02873991 | C12orf77      | 12 | 0.04004962 | 0.547729744 |
| -0.1102867 | cg09166410 | C13orf16      | 13 | 0.00337067 | 0.542018067 |
| -0.1011955 | cg08990474 | C13orf35      | 13 | 0.03576093 | 0.777239143 |
| -0.1705522 | cg01139586 | C14orf102;C14 | 14 | 0.0119905  | 0.445473877 |
| -0.1328407 | cg24169915 | C14orf177;C14 | 14 | 0.00014848 | 0.414824154 |
| -0.1174113 | cg18709904 | C14orf182     | 14 | 0.03127222 | 0.824851064 |
| -0.1109237 | cg05374809 | C14orf23      | 14 | 0.00998331 | 0.232293226 |
| -0.1484426 | cg03472898 | C14orf23;C14  | 14 | 0.0095099  | 0.240367313 |
| -0.1049722 | cg10883375 | C14orf43;C14  | 14 | 0.01345018 | 0.594886195 |
| -0.1819424 | cg00859280 | C14orf70      | 14 | 0.00019723 | 0.224411416 |
| -0.1030806 | cg03565081 | C14orf93;C14  | 14 | 0.01099652 | 0.501597511 |
| -0.1787979 | cg23482746 | C15orf27      | 15 | 0.00502589 | 0.648760628 |
| -0.212063  | cg00202460 | C15orf40;C15  | 15 | 0.0194821  | 0.5108794   |
| -0.192117  | cg11429271 | C15orf48;C15  | 15 | 0.01362838 | 0.341239937 |
| -0.1775375 | cg12609829 | C15orf53      | 15 | 0.00873052 | 0.792116159 |
| -0.1419417 | cg12056138 | C15orf60      | 15 | 0.03279217 | 0.887822001 |
| -0.1406468 | cg27129984 | C16orf38      | 16 | 0.00403058 | 0.459827957 |
| -0.1389332 | cg09897970 | C16orf54      | 16 | 0.0124695  | 0.675439607 |
| -0.1388134 | cg02319067 | C16orf54      | 16 | 0.00128966 | 0.521231283 |
| -0.1338905 | cg26285698 | C16orf54;C16  | 16 | 0.0101934  | 0.437370713 |
| -0.1322664 | cg07835443 | C16orf55      | 16 | 0.01632081 | 0.523597694 |
| -0.1116198 | cg04616793 | C16orf68      | 16 | 0.01532955 | 0.451313021 |
| -0.1079428 | cg24642468 | C16orf78      | 16 | 0.00144184 | 0.360265993 |
| -0.1019119 | cg25490145 | C17orf101;C17 | 17 | 0.00376975 | 0.787072149 |
| -0.1488688 | cg21465176 | C17orf101;C17 | 17 | 0.00618205 | 0.761234912 |
| -0.1293631 | cg01435401 | C17orf97      | 17 | 0.00050556 | 0.555047224 |
| -0.1226172 | cg18382305 | C18orf34;C18  | 18 | 0.02066579 | 0.605924054 |
| -0.1356194 | cg27638057 | C18orf45      | 18 | 0.02059713 | 0.638592551 |
| -0.1745829 | cg19584038 | C19orf28;C19  | 19 | 0.01755597 | 0.682090116 |
| -0.114092  | cg13689560 | C19orf36;MC   | 19 | 0.00196015 | 0.733205324 |
| -0.1547515 | cg20631044 | C19orf54;SNR  | 19 | 0.00790963 | 0.624415669 |



|            |            |              |    |            |             |
|------------|------------|--------------|----|------------|-------------|
| -0.108219  | cg17661462 | C19orf59     | 19 | 0.04989479 | 0.659741376 |
| -0.129934  | cg07723365 | C19orf59     | 19 | 0.02383442 | 0.543014588 |
| -0.1449073 | cg03470073 | C19orf59     | 19 | 0.01230088 | 0.578970052 |
| -0.1201818 | cg12571879 | C19orf59;C19 | 19 | 0.00963944 | 0.582917947 |
| -0.1238126 | cg05344495 | C19orf77     | 19 | 0.02007054 | 0.284708231 |
| -0.1635218 | cg06834507 | C1orf106;C19 | 1  | 0.02671736 | 0.785228861 |
| -0.1499967 | cg09163369 | C1orf107     | 1  | 0.01204487 | 0.458468003 |
| -0.2009012 | cg17518550 | C1orf150     | 1  | 0.02582472 | 0.676417945 |
| -0.1841476 | cg16385583 | C1orf150     | 1  | 0.00331688 | 0.690535787 |
| -0.1759086 | cg23068939 | C1orf162     | 1  | 0.03524618 | 0.692784356 |
| -0.1048174 | cg18886157 | C1orf174     | 1  | 0.03505794 | 0.794396155 |
| -0.1251086 | cg19375403 | C1orf174     | 1  | 0.00474952 | 0.777888883 |
| -0.1039319 | cg00231528 | C1orf200;PIK | 1  | 0.0017171  | 0.394948508 |
| -0.1211978 | cg08854008 | C1orf200;PIK | 1  | 0.00144109 | 0.557192132 |
| -0.1123308 | cg21118367 | C1orf21      | 1  | 0.00621109 | 0.335040862 |
| -0.102343  | cg24158160 | C1orf230     | 1  | 0.0112218  | 0.437639716 |
| -0.2136511 | cg05643188 | C1orf53      | 1  | 0.02144792 | 0.613397804 |
| -0.2882401 | cg15832577 | C1orf53      | 1  | 0.04182764 | 0.723143742 |
| -0.1535647 | cg03081691 | C1orf55      | 1  | 0.02014728 | 0.829409901 |
| -0.1461176 | cg26788737 | C1orf55      | 1  | 0.03047547 | 0.387520288 |
| -0.1316915 | cg22706106 | C1orf77;S100 | 1  | 0.03867735 | 0.683843237 |
| -0.1289095 | cg24931346 | C1QB         | 1  | 0.01033537 | 0.681303037 |
| -0.1230725 | cg12760869 | C1QL4        | 12 | 0.00156337 | 0.501602094 |
| -0.1217    | cg05003411 | C1QTNF7;C1Q  | 4  | 0.00118251 | 0.835618662 |
| -0.1184118 | cg15013617 | C20orf141    | 20 | 9.51E-05   | 0.317761562 |
| -0.1177316 | cg18157896 | C20orf141;LC | 20 | 0.00022274 | 0.497389609 |
| -0.1178346 | cg05890956 | C20orf186    | 20 | 0.02248305 | 0.674078981 |
| -0.1110437 | cg11316100 | C20orf24;C20 | 20 | 0.02614489 | 0.484156537 |
| -0.1508774 | cg11382945 | C20orf26;C20 | 20 | 0.01888804 | 0.48509152  |
| -0.1919371 | cg01319701 | C20orf54     | 20 | 0.00338568 | 0.391578556 |
| -0.1135106 | cg01479232 | C20orf54;C20 | 20 | 0.00645171 | 0.628038247 |
| -0.2092629 | cg10500737 | C21orf34;C21 | 21 | 0.00439311 | 0.226165887 |
| -0.1360071 | cg14065109 | C21orf57     | 21 | 0.01319045 | 0.609535    |
| -0.1110074 | cg20762729 | C21orf7      | 21 | 0.03082188 | 0.759344415 |
| -0.2401569 | cg08416522 | C21orf7      | 21 | 0.00140048 | 0.628131713 |
| -0.1940235 | cg22088368 | C22orf33;C22 | 22 | 0.02622996 | 0.782532748 |
| -0.1510901 | cg00083659 | C22orf33;C22 | 22 | 0.04306416 | 0.605918002 |
| -0.1360533 | cg11466708 | C22orf43     | 22 | 0.00939909 | 0.754966101 |
| -0.133513  | cg05249836 | C22orf9;C22o | 22 | 0.04587727 | 0.722838762 |
| -0.1300903 | cg19390317 | C2CD2;C2CD1  | 21 | 0.01697469 | 0.689501976 |
| -0.1198591 | cg18565216 | C2CD2;C2CD1  | 21 | 7.39E-05   | 0.295240866 |
| -0.1160332 | cg26174797 | C2orf53      | 2  | 0.00431366 | 0.556912945 |
| -0.2169232 | cg18755020 | C2orf54;C2oi | 2  | 0.03569713 | 0.724722933 |
| -0.1198693 | cg04499514 | C3AR1        | 12 | 0.01589797 | 0.481920529 |
| -0.1481031 | cg24618514 | C3orf21      | 3  | 0.01139254 | 0.413963432 |
| -0.1278781 | cg20749576 | C3orf27      | 3  | 0.00598789 | 0.404070688 |

|            |            |                   |    |            |             |
|------------|------------|-------------------|----|------------|-------------|
| -0.1442686 | cg11118413 | C3orf27           | 3  | 0.00016426 | 0.330919855 |
| -0.1238439 | cg16217908 | C3orf52           | 3  | 0.00982185 | 0.326252125 |
| -0.145484  | cg13916298 | C3orf66           | 3  | 0.00393932 | 0.623482228 |
| -0.1380374 | cg13371456 | C4orf22           | 4  | 0.04808178 | 0.732344697 |
| -0.1129783 | cg13521077 | C4orf22           | 4  | 0.02867065 | 0.370014493 |
| -0.1086921 | cg10224107 | C5AR1;C5AR1       | 19 | 0.00115667 | 0.427757218 |
| -0.1455917 | cg08470180 | C5orf24;C5orf24   | 5  | 0.0077681  | 0.52810778  |
| -0.2153767 | cg04871807 | C5orf27           | 5  | 0.00589897 | 0.832577585 |
| -0.1746554 | cg00287773 | C5orf32           | 5  | 0.00377323 | 0.55608851  |
| -0.1541424 | cg24686270 | C5orf46           | 5  | 0.01347306 | 0.539385236 |
| -0.1364509 | cg00090135 | C5orf49           | 5  | 0.02554586 | 0.780278095 |
| -0.1214824 | cg04706201 | C5orf56           | 5  | 0.01938567 | 0.849533836 |
| -0.1121608 | cg21171858 | C5orf56           | 5  | 0.02557313 | 0.72428546  |
| -0.1101971 | cg03653573 | C5orf56           | 5  | 0.01249893 | 0.438603135 |
| -0.103968  | cg16646054 | C5orf62           | 5  | 0.0482765  | 0.540243834 |
| -0.1005196 | cg04051335 | C5orf62           | 5  | 0.00846859 | 0.776647526 |
| -0.1212264 | cg16564946 | C6orf10           | 6  | 0.00562293 | 0.871024204 |
| -0.1351558 | cg06192961 | C6orf10           | 6  | 0.03996682 | 0.591686093 |
| -0.2083751 | cg06858835 | C6orf103          | 6  | 0.00536144 | 0.771860738 |
| -0.1930782 | cg08421910 | C6orf105;C6orf105 | 6  | 0.03102662 | 0.767634503 |
| -0.1663118 | cg15601361 | C6orf105;C6orf105 | 6  | 0.01381849 | 0.468614775 |
| -0.1646692 | cg20589862 | C6orf115          | 6  | 0.00047271 | 0.474944172 |
| -0.1301494 | cg25534601 | C6orf123          | 6  | 0.03008269 | 0.641906348 |
| -0.122258  | cg09931909 | C6orf150          | 6  | 0.04286169 | 0.827003983 |
| -0.1154492 | cg02407372 | C6orf164          | 6  | 0.0142029  | 0.432357109 |
| -0.112455  | cg19635401 | C6orf204;PLN      | 6  | 0.00328249 | 0.620060819 |
| -0.1201161 | cg20048521 | C6orf221          | 6  | 0.0218195  | 0.620273072 |
| -0.1277938 | cg18496965 | C6orf25;C6orf25   | 6  | 0.00953247 | 0.794315304 |
| -0.1179143 | cg01339648 | C6orf25;C6orf25   | 6  | 0.00467503 | 0.483291886 |
| -0.1386359 | cg18997124 | C6orf27           | 6  | 0.01972069 | 0.748988975 |
| -0.1502701 | cg13541527 | C6orf48;C6orf48   | 6  | 0.01029699 | 0.454304569 |
| -0.2001266 | cg10504632 | C7orf10           | 7  | 0.01299946 | 0.360024345 |
| -0.2851622 | cg21495349 | C7orf50;C7orf50   | 7  | 0.01833617 | 0.552467201 |
| -0.1142284 | cg18377014 | C7orf50;C7orf50   | 7  | 0.00953175 | 0.67053737  |
| -0.1671235 | cg10009497 | C7orf50;C7orf50   | 7  | 0.02062432 | 0.791073451 |
| -0.1358136 | cg22785556 | C7orf50;C7orf50   | 7  | 0.04224895 | 0.764274999 |
| -0.1143943 | cg02327530 | C7orf51           | 7  | 0.00874397 | 0.685236824 |
| -0.1124266 | cg09453760 | C7orf65           | 7  | 0.00301135 | 0.395709343 |
| -0.1640053 | cg08691328 | C7orf72           | 7  | 0.00206247 | 0.657493216 |
| -0.1007434 | cg15241236 | C8orf34           | 8  | 0.00079501 | 0.775184758 |
| -0.1299739 | cg22454022 | C8orf34           | 8  | 0.00380729 | 0.535132672 |
| -0.1326079 | cg14601770 | C8orf42           | 8  | 0.02206073 | 0.800042329 |
| -0.1072671 | cg15947176 | C8orf46           | 8  | 0.00363762 | 0.445963674 |
| -0.1960949 | cg09933836 | C8orf75           | 8  | 0.00059275 | 0.368121116 |
| -0.1388751 | cg02679745 | C9orf139;FUT1     | 9  | 0.04621926 | 0.794619904 |
| -0.1100142 | cg13757845 | C9orf139;FUT1     | 9  | 0.01365264 | 0.472786985 |

|            |            |             |    |            |             |
|------------|------------|-------------|----|------------|-------------|
| -0.1719635 | cg24392274 | C9orf16     | 9  | 0.00298545 | 0.427385516 |
| -0.1011169 | cg03036214 | CA12;CA12   | 15 | 0.00971697 | 0.841048632 |
| -0.1402195 | cg10323962 | CA5A        | 16 | 0.04313009 | 0.856799241 |
| -0.1130494 | cg06745083 | CA5A        | 16 | 0.00308382 | 0.601149393 |
| -0.1766464 | cg21039723 | CAB39;CAB3! | 2  | 0.00814488 | 0.712685992 |
| -0.1004424 | cg11847933 | CABC1       | 1  | 0.00597532 | 0.538022931 |
| -0.1462281 | cg17009616 | CABIN1      | 22 | 0.04896649 | 0.765021156 |
| -0.1671133 | cg19671694 | CABLES2     | 20 | 0.03404188 | 0.728726674 |
| -0.1681896 | cg26224018 | CACHD1      | 1  | 0.00695699 | 0.815627992 |
| -0.1650026 | cg14140691 | CACNA1B     | 9  | 0.00136172 | 0.396432336 |
| -0.2069173 | cg14022794 | CACNA1B     | 9  | 0.00220131 | 0.339955581 |
| -0.1279797 | cg13811936 | CACNA1B     | 9  | 0.01326546 | 0.587579839 |
| -0.1857642 | cg13939602 | CACNA1C;CA  | 12 | 0.04090064 | 0.684265818 |
| -0.1335964 | cg20495738 | CACNA1C;CA  | 12 | 0.04845326 | 0.788436466 |
| -0.1723636 | cg16728539 | CACNA1C;CA  | 12 | 0.00193674 | 0.698770307 |
| -0.1696096 | cg02468320 | CACNA1C;CA  | 12 | 0.00300044 | 0.655617385 |
| -0.1240573 | cg10573505 | CACNA1E     | 1  | 0.0180818  | 0.441391201 |
| -0.1060972 | cg20433386 | CACNA1G;CA  | 17 | 0.02501062 | 0.776950368 |
| -0.1767155 | cg01637090 | CACNA1H;CA  | 16 | 0.00011444 | 0.272757896 |
| -0.1483039 | cg07890233 | CACNA1H;CA  | 16 | 0.00863201 | 0.739103891 |
| -0.1017125 | cg23795178 | CACNA1I;CAC | 22 | 0.00029575 | 0.282371657 |
| -0.2882532 | cg02041885 | CACNA1I;CAC | 22 | 0.00299875 | 0.519925811 |
| -0.119512  | cg00191625 | CACNA1I;CAC | 22 | 0.00523108 | 0.43249308  |
| -0.1357426 | cg13532410 | CACNA2D3    | 3  | 0.01896085 | 0.688267831 |
| -0.13277   | cg18563642 | CACNA2D3    | 3  | 0.00121145 | 0.279619052 |
| -0.1097049 | cg02844593 | CACNA2D3    | 3  | 0.04335146 | 0.807667927 |
| -0.1242737 | cg10791541 | CACNA2D3    | 3  | 0.00090536 | 0.701278001 |
| -0.1702749 | cg16990755 | CACNB1;CAC  | 17 | 0.00825592 | 0.824777152 |
| -0.1018033 | cg02300652 | CACNB4;CAC  | 2  | 0.01284643 | 0.379808649 |
| -0.1996306 | cg25482874 | CACNG6;CAC  | 19 | 0.00137725 | 0.294673054 |
| -0.1672726 | cg10366742 | CACNG7      | 19 | 0.00452072 | 0.336172231 |
| -0.1656903 | cg19521693 | CACNG8      | 19 | 0.00287528 | 0.479182809 |
| -0.240516  | cg01293740 | CACNG8      | 19 | 0.00048172 | 0.427880004 |
| -0.1877366 | cg24317406 | CACYBP;CAC  | 1  | 0.03318956 | 0.501293156 |
| -0.1834181 | cg03505501 | CADM1;CADI  | 11 | 0.00980719 | 0.749095607 |
| -0.1707068 | cg02753187 | CALCOCO2    | 17 | 0.00125997 | 0.672256721 |
| -0.13916   | cg00449067 | CALCRL      | 2  | 0.00024097 | 0.714729674 |
| -0.1368586 | cg21350115 | CALCRL;CALC | 2  | 0.01642824 | 0.505890222 |
| -0.1328565 | cg01077501 | CALD1;CALD: | 7  | 0.00718286 | 0.835765031 |
| -0.108097  | cg07625383 | CALD1;CALD: | 7  | 0.02602358 | 0.645854102 |
| -0.1565874 | cg25937598 | CALHM3      | 10 | 0.03447263 | 0.728405975 |
| -0.1271553 | cg26957187 | CALN1;CALN: | 7  | 0.0008376  | 0.550499263 |
| -0.1236873 | cg25626166 | CAMK1D;CAM  | 10 | 0.0295908  | 0.690049616 |
| -0.1178466 | cg12273284 | CAMK1D;CAM  | 10 | 0.00329704 | 0.496642031 |
| -0.2019753 | cg20994118 | CAMK1G      | 1  | 0.02135007 | 0.701704224 |
| -0.14599   | cg22032709 | CAMKK2;CAN  | 12 | 0.03014035 | 0.416477693 |

|            |            |             |    |            |             |
|------------|------------|-------------|----|------------|-------------|
| -0.128418  | cg17541002 | CAMKK2;CAM  | 12 | 0.00105005 | 0.739333683 |
| -0.1101676 | cg02275084 | CAMTA1      | 1  | 0.02307437 | 0.649987725 |
| -0.1060057 | cg21583016 | CAMTA1      | 1  | 0.04938051 | 0.810651081 |
| -0.1443622 | cg15568225 | CAP1;CAP1   | 1  | 0.03102662 | 0.631432504 |
| -0.1064621 | cg21410633 | CAP1;CAP1   | 1  | 0.02023468 | 0.605860759 |
| -0.1763456 | cg03654273 | CAPZB       | 1  | 0.03063632 | 0.770884416 |
| -0.1166327 | cg01832549 | CAPZB       | 1  | 0.01025381 | 0.792768083 |
| -0.1108386 | cg05820435 | CAPZB       | 1  | 0.01725968 | 0.63812358  |
| -0.1117827 | cg15136975 | CAPZB       | 1  | 0.01613432 | 0.460112838 |
| -0.1886233 | cg00968167 | CAPZB       | 1  | 0.00550744 | 0.466736705 |
| -0.2065727 | cg06360604 | CAPZB       | 1  | 0.00933374 | 0.633915442 |
| -0.1513044 | cg00273359 | CARD11      | 7  | 0.00138504 | 0.411293783 |
| -0.1415717 | cg06643466 | CARD11      | 7  | 0.00113115 | 0.298883103 |
| -0.1284041 | cg09077096 | CARD11      | 7  | 0.04688352 | 0.723744191 |
| -0.1244668 | cg13775050 | CARD16;CASI | 11 | 0.01636144 | 0.809334477 |
| -0.1150049 | cg26818786 | CARD6       | 5  | 0.01456137 | 0.402718257 |
| -0.1579689 | cg01104590 | CARS;CARS;C | 11 | 0.00657166 | 0.805920333 |
| -0.1468954 | cg00093643 | CASC4;CASC4 | 15 | 0.0028899  | 0.658216789 |
| -0.1436883 | cg24599065 | CASP10      | 2  | 0.01082821 | 0.572420603 |
| -0.113641  | cg07754492 | CASP10;CAS  | 2  | 0.03311487 | 0.341665282 |
| -0.1014556 | cg15930041 | CASP14      | 19 | 0.02423523 | 0.682666795 |
| -0.1824506 | cg08469834 | CASP4       | 11 | 0.00102138 | 0.197845531 |
| -0.1211502 | cg25095814 | CASP8;CASPE | 2  | 0.04626973 | 0.750595857 |
| -0.1147987 | cg24410214 | CASP8;CASPE | 2  | 0.00064117 | 0.361378042 |
| -0.1673279 | cg19267254 | CASP9;CASPE | 1  | 0.02595962 | 0.572906861 |
| -0.100627  | cg14985891 | CASQ2       | 1  | 0.01716122 | 0.474704621 |
| -0.1245953 | cg09729182 | CASR        | 3  | 0.02648741 | 0.405312844 |
| -0.1628084 | cg16210447 | CASS4;CASS4 | 20 | 0.00463909 | 0.711653335 |
| -0.1585499 | cg07159230 | CASZ1;CASZ1 | 1  | 0.0007261  | 0.517197286 |
| -0.15269   | cg23685580 | CATSPER2;CA | 15 | 0.04964983 | 0.897621118 |
| -0.1323537 | cg08317738 | CBFA2T3     | 16 | 0.01871588 | 0.662898606 |
| -0.1248137 | cg03186440 | CBFA2T3     | 16 | 0.02228887 | 0.658791416 |
| -0.1136529 | cg01534572 | CBFA2T3     | 16 | 0.01672586 | 0.716710955 |
| -0.1335542 | cg08732950 | CBFA2T3     | 16 | 0.01644339 | 0.724603374 |
| -0.1067034 | cg07057235 | CBFA2T3     | 16 | 0.0046572  | 0.412367566 |
| -0.1928346 | cg05057515 | CBFA2T3     | 16 | 0.00391674 | 0.565864236 |
| -0.1487747 | cg23965590 | CBL         | 11 | 0.00188114 | 0.389718959 |
| -0.1426811 | cg00231483 | CBLN2       | 18 | 0.00179097 | 0.482952995 |
| -0.1042848 | cg01544580 | CBX1        | 17 | 0.01516359 | 0.779823589 |
| -0.1183109 | cg09234161 | CCDC102A    | 16 | 0.02299867 | 0.696981216 |
| -0.1692256 | cg19283806 | CCDC102B    | 18 | 0.00049358 | 0.682743605 |
| -0.1616527 | cg25306859 | CCDC108;CCI | 2  | 0.00990569 | 0.410975555 |
| -0.1113168 | cg21616935 | CCDC11      | 18 | 0.01420283 | 0.601334022 |
| -0.2380732 | cg26539468 | CCDC111     | 4  | 0.00391946 | 0.467467326 |
| -0.1521359 | cg24144883 | CCDC116     | 22 | 0.0015325  | 0.424497297 |
| -0.1144234 | cg07220903 | CCDC12      | 3  | 0.00334746 | 0.5448203   |

|            |            |             |    |            |             |
|------------|------------|-------------|----|------------|-------------|
| -0.1114923 | cg02943305 | CCDC129     | 7  | 0.00224917 | 0.516235722 |
| -0.1584523 | cg03198066 | CCDC148;CCI | 2  | 0.00607333 | 0.708481812 |
| -0.1666764 | cg12585923 | CCDC152     | 5  | 0.04878811 | 0.497852571 |
| -0.1666908 | cg03100209 | CCDC155     | 19 | 0.00305184 | 0.362711728 |
| -0.1093122 | cg26534677 | CCDC25      | 8  | 0.03024349 | 0.413520623 |
| -0.1627308 | cg07997596 | CCDC27      | 1  | 0.00596329 | 0.501009438 |
| -0.1128062 | cg07696006 | CCDC33      | 15 | 0.03611861 | 0.792655556 |
| -0.1925678 | cg20099806 | CCDC47      | 17 | 0.00493603 | 0.486387835 |
| -0.1214259 | cg18753928 | CCDC52      | 3  | 0.02691811 | 0.584068347 |
| -0.1548148 | cg10517650 | CCDC52      | 3  | 0.02803391 | 0.868909435 |
| -0.1073793 | cg15507901 | CCDC54      | 3  | 0.00716572 | 0.77894461  |
| -0.106396  | cg12504696 | CCDC60      | 12 | 0.02058804 | 0.718753836 |
| -0.1254699 | cg00314660 | CCDC75;HEA  | 2  | 0.00030197 | 0.331843549 |
| -0.1247052 | cg08365738 | CCDC80;CCD  | 3  | 0.00059056 | 0.70141619  |
| -0.1182255 | cg12044213 | CCHCR1;TCF  | 6  | 0.01648236 | 0.568932976 |
| -0.1034377 | cg26101277 | CCL1        | 17 | 0.00131065 | 0.272297012 |
| -0.1564259 | cg17118262 | CCL1        | 17 | 0.01130612 | 0.640017278 |
| -0.1606132 | cg22647738 | CCL16       | 17 | 0.01635883 | 0.868880836 |
| -0.214539  | cg17864156 | CCL2        | 17 | 0.01031849 | 0.442394397 |
| -0.1954998 | cg10439431 | CCL23;CCL23 | 17 | 0.03150807 | 0.786385865 |
| -0.1740575 | cg02932854 | CCL24       | 7  | 0.04262735 | 0.393865689 |
| -0.1561186 | cg05034363 | CCL24       | 7  | 0.00879802 | 0.698826921 |
| -0.1332135 | cg12788666 | CCL24       | 7  | 0.00517536 | 0.646572584 |
| -0.1181475 | cg17315454 | CCL24       | 7  | 0.00274219 | 0.612862556 |
| -0.1047137 | cg11303839 | CCL26       | 7  | 0.00528743 | 0.714106905 |
| -0.1670972 | cg02828397 | CCL3        | 17 | 0.00948616 | 0.54118727  |
| -0.1084819 | cg22518733 | CCL3        | 17 | 0.00541396 | 0.367400316 |
| -0.2141204 | cg18407309 | CCL3        | 17 | 0.00264757 | 0.672552695 |
| -0.1926938 | cg21335375 | CCL3;CCL3   | 17 | 0.00343998 | 0.575172234 |
| -0.1355844 | cg02483931 | CCL5        | 17 | 0.00147547 | 0.439243858 |
| -0.1176917 | cg08656816 | CCL5        | 17 | 0.0032325  | 0.380279984 |
| -0.1236637 | cg06083483 | CCL8        | 17 | 0.02748326 | 0.571992198 |
| -0.1895137 | cg01636591 | CCL8;CCL8   | 17 | 0.00133684 | 0.398722952 |
| -0.1769726 | cg18205668 | CCM2;CCM2;  | 7  | 0.00912588 | 0.775549793 |
| -0.1689266 | cg03744842 | CCM2;CCM2;  | 7  | 0.01536788 | 0.347475824 |
| -0.1037568 | cg24110396 | CCNY        | 10 | 0.00135187 | 0.746040779 |
| -0.1304446 | cg14312439 | CCR3;CCR3;C | 3  | 0.02277408 | 0.844244497 |
| -0.1550613 | cg23817981 | CCR4        | 3  | 0.01327433 | 0.485056042 |
| -0.1548973 | cg17786516 | CCR5;CCR5   | 3  | 0.02204141 | 0.805129806 |
| -0.1588082 | cg13615963 | CCR6;CCR6;C | 6  | 0.02412835 | 0.53159414  |
| -0.1805887 | cg23663547 | CCR7        | 17 | 0.01828093 | 0.578374908 |
| -0.1223582 | cg26960939 | CCR7        | 17 | 0.02010505 | 0.523565049 |
| -0.125126  | cg16047279 | CCR7        | 17 | 0.00159447 | 0.680398541 |
| -0.2028746 | cg07248223 | CCR7        | 17 | 0.00321619 | 0.730715741 |
| -0.131198  | cg19850333 | CCRL2;CCRL2 | 3  | 0.01150764 | 0.362950818 |
| -0.2370751 | cg18599081 | CCRL2;CCRL2 | 3  | 0.00850508 | 0.751952161 |

|            |            |             |    |            |             |
|------------|------------|-------------|----|------------|-------------|
| -0.1144073 | cg23350385 | CCRL2;CCRL2 | 3  | 0.00801285 | 0.617593746 |
| -0.1187852 | cg20975414 | CD160       | 1  | 0.00379978 | 0.623687022 |
| -0.1171444 | cg16993682 | CD1C        | 1  | 0.00172155 | 0.638154805 |
| -0.1107264 | cg03701795 | CD1E;CD1E;C | 1  | 5.24E-05   | 0.204820238 |
| -0.1034563 | cg17638468 | CD200R1;CD  | 3  | 0.04059349 | 0.688675845 |
| -0.1917881 | cg25360761 | CD22        | 19 | 0.01019249 | 0.738694194 |
| -0.115275  | cg15743985 | CD22        | 19 | 0.0056783  | 0.667271525 |
| -0.1499934 | cg17111087 | CD247;CD24  | 1  | 0.02104758 | 0.754983659 |
| -0.1536548 | cg19090861 | CD248       | 11 | 0.00486899 | 0.437821224 |
| -0.1167051 | cg02099418 | CD28        | 2  | 0.00579801 | 0.827205869 |
| -0.1075493 | cg13790288 | CD28        | 2  | 0.00357747 | 0.653208358 |
| -0.1038395 | cg22309950 | CD28;CD28   | 2  | 0.02167974 | 0.808799954 |
| -0.2319927 | cg04098585 | CD28;CD28   | 2  | 0.00168081 | 0.760683799 |
| -0.1173882 | cg03069736 | CD300C;CD30 | 17 | 0.00831633 | 0.557143953 |
| -0.1063434 | cg14438208 | CD300E;CD30 | 17 | 0.0059395  | 0.830983701 |
| -0.1586499 | cg06650256 | CD300LB     | 17 | 0.02513765 | 0.565585507 |
| -0.1223379 | cg00873351 | CD300LB     | 17 | 0.00453924 | 0.388526509 |
| -0.1394702 | cg14075731 | CD300LB;CD  | 17 | 0.00906754 | 0.631800444 |
| -0.1285572 | cg26886976 | CD300LD;C1  | 17 | 0.01472069 | 0.732830659 |
| -0.2112715 | cg17056607 | CD300LF;RAE | 17 | 0.0039877  | 0.457795866 |
| -0.2015159 | cg10129493 | CD33;CD33   | 19 | 0.02693559 | 0.785101813 |
| -0.1003728 | cg20293352 | CD34;CD34   | 1  | 0.02498211 | 0.407574901 |
| -0.2058606 | cg05044173 | CD4         | 12 | 0.01191327 | 0.570610536 |
| -0.1155265 | cg22908581 | CD4         | 12 | 0.00433289 | 0.421706417 |
| -0.1704326 | cg13512987 | CD4;CD4     | 12 | 0.02462827 | 0.489222321 |
| -0.1144574 | cg20971158 | CD44;CD44;C | 11 | 0.0003379  | 0.85749167  |
| -0.2139859 | cg14082886 | CD44;CD44;C | 11 | 0.00181831 | 0.820958268 |
| -0.1721581 | cg13311440 | CD48        | 1  | 0.0136186  | 0.665462034 |
| -0.1482001 | cg24154340 | CD48        | 1  | 0.03387477 | 0.757866808 |
| -0.1090305 | cg16909402 | CD48        | 1  | 0.03191994 | 0.671708071 |
| -0.1021558 | cg19408145 | CD48        | 1  | 0.00159391 | 0.467569449 |
| -0.1778246 | cg20868817 | CD48        | 1  | 0.00083773 | 0.478436485 |
| -0.117964  | cg06180389 | CD53;CD53   | 1  | 0.00215996 | 0.442661277 |
| -0.112104  | cg10516886 | CD53;CD53   | 1  | 0.03478191 | 0.598985013 |
| -0.1311819 | cg17240760 | CD53;CD53   | 1  | 0.0029475  | 0.624974434 |
| -0.1037427 | cg25080571 | CD59;CD59;C | 11 | 0.02087737 | 0.859804816 |
| -0.1242147 | cg04188351 | CD59;CD59;C | 11 | 0.01200998 | 0.402069587 |
| -0.2688266 | cg23903301 | CD59;CD59;C | 11 | 0.00340771 | 0.628656161 |
| -0.1389735 | cg07440264 | CD59;CD59;C | 11 | 0.00436073 | 0.746732575 |
| -0.1267274 | cg26427109 | CD6         | 11 | 0.04171983 | 0.810269968 |
| -0.1564046 | cg13014558 | CD6         | 11 | 0.01210646 | 0.721906975 |
| -0.1555166 | cg09902130 | CD6;CD6     | 11 | 0.02631988 | 0.782098691 |
| -0.1250084 | cg11848173 | CD63;CD63   | 12 | 0.00228542 | 0.568810434 |
| -0.1238118 | cg03677492 | CD7         | 17 | 0.0007154  | 0.322505046 |
| -0.1017732 | cg06692929 | CD7         | 17 | 0.00116429 | 0.38554715  |
| -0.1008022 | cg11624309 | CD79A;CD79  | 19 | 0.01131773 | 0.44357529  |

|            |            |             |    |            |             |
|------------|------------|-------------|----|------------|-------------|
| -0.119162  | cg21816743 | CD79B;CD79  | 17 | 0.0134883  | 0.777195078 |
| -0.1316069 | cg21108085 | CD82;CD82   | 11 | 0.03294072 | 0.288950065 |
| -0.1238074 | cg01878435 | CD86        | 3  | 0.00525076 | 0.39837318  |
| -0.1623743 | cg10578007 | CD93        | 20 | 0.04657841 | 0.611009405 |
| -0.2809886 | cg11119596 | CD96;CD96;C | 3  | 0.01008242 | 0.379392639 |
| -0.1731396 | cg02567958 | CDC42EP1    | 22 | 0.00641366 | 0.400108673 |
| -0.1653969 | cg15035133 | CDC42EP1    | 22 | 0.02309169 | 0.771123684 |
| -0.1132578 | cg07341609 | CDC42EP1    | 22 | 0.00027677 | 0.670916139 |
| -0.1122563 | cg09220326 | CDCP1;CDCP  | 3  | 0.0058688  | 0.342027054 |
| -0.1489229 | cg02973961 | CDH11       | 16 | 0.00779875 | 0.77699141  |
| -0.2273502 | cg02069674 | CDH13       | 16 | 0.00340755 | 0.543734455 |
| -0.201032  | cg09415485 | CDH13       | 16 | 0.01453924 | 0.483305618 |
| -0.1529185 | cg16696923 | CDH17       | 8  | 0.04001114 | 0.568860539 |
| -0.1334946 | cg16679068 | CDH17       | 8  | 0.03583406 | 0.482414927 |
| -0.1026526 | cg11152825 | CDH22       | 20 | 0.04636783 | 0.773180118 |
| -0.208626  | cg04304802 | CDH23       | 10 | 0.00412917 | 0.511547734 |
| -0.2179899 | cg04005943 | CDH23;CDH2  | 10 | 0.00905552 | 0.636588596 |
| -0.1013108 | cg00526273 | CDH4        | 20 | 0.02764229 | 0.918200212 |
| -0.1000838 | cg16325421 | CDH4        | 20 | 0.02265801 | 0.555942063 |
| -0.1348558 | cg00044665 | CDH5        | 16 | 0.02672457 | 0.524647473 |
| -0.1201572 | cg02078525 | CDH5        | 16 | 0.01019067 | 0.450022808 |
| -0.1247647 | cg05634637 | CDH6        | 5  | 0.04499414 | 0.584946683 |
| -0.1050779 | cg05946623 | CDH8        | 16 | 0.01812944 | 0.620353787 |
| -0.131026  | cg03112433 | CDK14       | 7  | 0.01461041 | 0.647985885 |
| -0.1239763 | cg02723617 | CDK5;CDK5;S | 7  | 0.00985946 | 0.36663867  |
| -0.1083888 | cg25156198 | CDK6;CDK6   | 7  | 0.02321149 | 0.483109039 |
| -0.1788482 | cg19103429 | CDK6;CDK6   | 7  | 0.0266699  | 0.682835939 |
| -0.1755821 | cg11998200 | CDK6;CDK6   | 7  | 0.0038716  | 0.520785401 |
| -0.157052  | cg05101437 | CDK6;CDK6   | 7  | 2.83E-05   | 0.521048157 |
| -0.1354183 | cg23342625 | CDKAL1      | 6  | 0.00732323 | 0.847698143 |
| -0.1860315 | cg06470626 | CDR2        | 16 | 0.00079016 | 0.289871758 |
| -0.1078285 | cg24735489 | CDSN;PSORS  | 6  | 0.0242207  | 0.738394684 |
| -0.1506561 | cg06321045 | CDSN;PSORS  | 6  | 0.00637685 | 0.747716613 |
| -0.1056508 | cg11503274 | CDX1        | 5  | 0.00347339 | 0.670880544 |
| -0.1049523 | cg03545404 | CDX1        | 5  | 0.01433316 | 0.596252804 |
| -0.1128106 | cg17384457 | CEACAM20;C  | 19 | 0.02803391 | 0.718692383 |
| -0.114726  | cg23241878 | CEACAM21;C  | 19 | 0.03346706 | 0.449432396 |
| -0.1269544 | cg19187564 | CEACAM4     | 19 | 0.00011921 | 0.26137451  |
| -0.1333924 | cg21529807 | CEACAM4     | 19 | 0.0083632  | 0.386982132 |
| -0.1203464 | cg15691199 | CEBPE       | 14 | 0.0047272  | 0.717636268 |
| -0.1537844 | cg06726231 | CECR1;CECR1 | 22 | 0.00524701 | 0.474296551 |
| -0.1876367 | cg13762691 | CECR2       | 22 | 0.03616577 | 0.609829193 |
| -0.120692  | cg01409421 | CECR5;CECR5 | 22 | 0.00636848 | 0.698955943 |
| -0.1010738 | cg09397359 | CELSR3      | 3  | 0.01409581 | 0.766745566 |
| -0.1662435 | cg13237068 | CENPJ       | 13 | 0.01880528 | 0.843437886 |
| -0.2338451 | cg26542660 | CEP135      | 4  | 0.00299027 | 0.509559937 |

|            |            |              |    |            |             |
|------------|------------|--------------|----|------------|-------------|
| -0.1748941 | cg03447083 | CES3         | 16 | 0.00221383 | 0.333587552 |
| -0.145049  | cg05647929 | CFC1B;CFC1   | 2  | 0.00426214 | 0.542006909 |
| -0.1226898 | cg22092521 | CFD          | 19 | 0.00098689 | 0.455495184 |
| -0.2044838 | cg06633978 | CFDP1        | 16 | 0.01990676 | 0.838041972 |
| -0.1358913 | cg20784841 | CFHR4        | 1  | 0.03322682 | 0.51430832  |
| -0.1028871 | cg10947827 | CFLAR;CFLAR  | 2  | 0.01242154 | 0.477489969 |
| -0.1032645 | cg03974286 | CFLAR;CFLAR  | 2  | 0.00833413 | 0.485451194 |
| -0.1057854 | cg23457862 | CFLAR;CFLAR  | 2  | 0.001358   | 0.467418742 |
| -0.1143017 | cg12944530 | CFLAR;CFLAR  | 2  | 0.00528042 | 0.84508905  |
| -0.1404634 | cg07596668 | CGN          | 1  | 0.01316345 | 0.744617037 |
| -0.1114553 | cg25198049 | CGN          | 1  | 0.00167467 | 0.593997125 |
| -0.1349816 | cg18670236 | CHCHD6       | 3  | 0.00153807 | 0.782937856 |
| -0.1168167 | cg17133774 | CHD5         | 1  | 0.00413002 | 0.335963103 |
| -0.1185371 | cg25035059 | CHD7         | 8  | 0.01196516 | 0.255059665 |
| -0.1122296 | cg09941713 | CHD7         | 8  | 0.02567656 | 0.460669031 |
| -0.1073179 | cg23013853 | CHGA         | 14 | 0.04828005 | 0.563173925 |
| -0.1464569 | cg16402814 | CHID1        | 11 | 0.00620224 | 0.39139549  |
| -0.1055058 | cg07414525 | CHL1         | 3  | 0.03001942 | 0.502751124 |
| -0.1290246 | cg03355213 | CHMP4B       | 20 | 0.00124782 | 0.675529318 |
| -0.1144872 | cg11941300 | CHRFAM7A;C   | 15 | 0.03552354 | 0.819331801 |
| -0.1641498 | cg04590119 | CHRM2;CHRI   | 7  | 0.02340361 | 0.717301592 |
| -0.150266  | cg18853490 | CHRM3        | 1  | 0.00763664 | 0.827705942 |
| -0.1042881 | cg27051318 | CHRNA6       | 8  | 0.04199477 | 0.71065141  |
| -0.1384065 | cg07157107 | CHRNA6       | 8  | 0.00293835 | 0.417969852 |
| -0.1229649 | cg06523556 | CHRNA6       | 8  | 0.01883869 | 0.410419297 |
| -0.1870434 | cg26531231 | CHRNA9       | 4  | 0.02188931 | 0.765682654 |
| -0.1362287 | cg24797431 | CHRNB3       | 8  | 0.03825337 | 0.477333869 |
| -0.1100875 | cg00608661 | CHST11       | 12 | 0.01888841 | 0.780480885 |
| -0.1237908 | cg16861964 | CHST11       | 12 | 0.0119905  | 0.397221177 |
| -0.1102537 | cg07921503 | CHST12       | 7  | 0.01567328 | 0.774423038 |
| -0.292904  | cg18664965 | CHST13       | 3  | 0.02629198 | 0.446636082 |
| -0.1269613 | cg13276580 | CHST15       | 10 | 0.00049696 | 0.510712403 |
| -0.181355  | cg08165960 | CHSY1        | 15 | 0.01534992 | 0.845094726 |
| -0.195692  | cg20388165 | CHSY1        | 15 | 0.01296043 | 0.811671163 |
| -0.1663314 | cg08327038 | CIRH1A       | 16 | 0.04605345 | 0.456479237 |
| -0.1196879 | cg02295216 | CKLF;CKLF;Ck | 16 | 0.00404671 | 0.393461451 |
| -0.1195082 | cg07232063 | CLCA1        | 1  | 0.01693883 | 0.758096547 |
| -0.2585754 | cg13790426 | CLCC1;CLCC1  | 1  | 0.0006377  | 0.569145429 |
| -0.2159814 | cg08702344 | CLDN12       | 7  | 0.0311161  | 0.758757819 |
| -0.1921668 | cg13643452 | CLEC14A      | 14 | 0.00850956 | 0.301341762 |
| -0.1830104 | cg14473145 | CLEC14A      | 14 | 0.00200502 | 0.416931708 |
| -0.1811813 | cg03217729 | CLEC16A      | 16 | 0.02266118 | 0.636583235 |
| -0.1749588 | cg17475456 | CLEC2B;CLEC  | 12 | 0.0039877  | 0.372722935 |
| -0.1545231 | cg08321576 | CLEC2B;CLEC  | 12 | 0.00040656 | 0.532279155 |
| -0.1540808 | cg13300689 | CLEC2D;CLEC  | 12 | 0.00012533 | 0.241344333 |
| -0.1418201 | cg03447908 | CLEC3B       | 3  | 0.00265557 | 0.719265727 |



|            |            |             |    |            |             |
|------------|------------|-------------|----|------------|-------------|
| -0.1341144 | cg18460107 | CLEC4C;CLEC | 12 | 0.00028678 | 0.663219361 |
| -0.1336247 | cg21769117 | CLIC1       | 6  | 0.04185479 | 0.801371576 |
| -0.1304646 | cg03619586 | CLIC1       | 6  | 0.00083937 | 0.402889326 |
| -0.1285411 | cg18434367 | CLIC5;CLIC5 | 6  | 0.00065412 | 0.787638521 |
| -0.1239625 | cg16474725 | CLIC5;CLIC5 | 6  | 0.00648544 | 0.714539229 |
| -0.1061472 | cg13730618 | CLIC6       | 21 | 0.02152695 | 0.500617501 |
| -0.1303298 | cg10196696 | CLINT1      | 5  | 0.00938028 | 0.228470471 |
| -0.1601981 | cg26052635 | CLIP4       | 2  | 0.02231764 | 0.493428736 |
| -0.175675  | cg05068951 | CLMN        | 14 | 0.00606834 | 0.645316689 |
| -0.1552405 | cg02330500 | CLMN        | 14 | 0.00026637 | 0.522824179 |
| -0.1274233 | cg05239310 | CLMN        | 14 | 0.00117306 | 0.532703847 |
| -0.1466941 | cg03254067 | CLNK        | 4  | 0.03500151 | 0.480094705 |
| -0.1013015 | cg20143111 | CLNK        | 4  | 0.03611679 | 0.766096969 |
| -0.1196695 | cg00865429 | CLNK        | 4  | 0.04872753 | 0.614130028 |
| -0.108785  | cg06745511 | CLNK        | 4  | 0.01049367 | 0.390443241 |
| -0.1180797 | cg00326231 | CLTCL1;CLTC | 22 | 0.00049005 | 0.421492104 |
| -0.1836049 | cg06366789 | CLYBL       | 13 | 0.0017168  | 0.774162191 |
| -0.176741  | cg12186816 | CNBD1       | 8  | 0.00191197 | 0.341465995 |
| -0.1625387 | cg14963724 | CNDP2;CNDF  | 18 | 0.02410755 | 0.712253435 |
| -0.1535909 | cg27029518 | CNDP2;CNDF  | 18 | 0.02223614 | 0.510222453 |
| -0.1495846 | cg09988837 | CNIH3       | 1  | 0.00376223 | 0.572344234 |
| -0.1446093 | cg02945192 | CNN2;CNN2   | 19 | 0.00418109 | 0.463747674 |
| -0.1174805 | cg14738766 | CNPY3       | 6  | 0.00611756 | 0.5435986   |
| -0.1145206 | cg16679650 | CNR2        | 1  | 0.03774695 | 0.60484723  |
| -0.1266852 | cg11812748 | CNST;CNST   | 1  | 0.01528347 | 0.337666465 |
| -0.1074989 | cg14131220 | CNTFR;CNTFI | 9  | 0.00201777 | 0.681394499 |
| -0.1640232 | cg02825887 | CNTFR;CNTFI | 9  | 0.0002921  | 0.481263468 |
| -0.1080588 | cg13336112 | CNTN3       | 3  | 0.00520925 | 0.833341787 |
| -0.1627395 | cg19604896 | CNTN4       | 3  | 0.03432872 | 0.76177578  |
| -0.1484439 | cg22878054 | CNTN5;CNTN  | 11 | 0.04185208 | 0.752436072 |
| -0.1152498 | cg17372101 | CNTNAP2     | 7  | 0.03388825 | 0.714238827 |
| -0.1745361 | cg20694241 | CNTNAP3     | 9  | 0.00693336 | 0.592223046 |
| -0.2024012 | cg20825022 | CNTNAP5     | 2  | 0.02261326 | 0.623818556 |
| -0.1520087 | cg01013522 | CNTNAP5     | 2  | 0.03632523 | 0.672148132 |
| -0.1001455 | cg22809726 | COL1A1      | 17 | 0.00064187 | 0.203257143 |
| -0.1823046 | cg02186748 | COL1A1      | 17 | 0.02210502 | 0.613513111 |
| -0.1185337 | cg25026926 | COL1A1      | 17 | 0.01375489 | 0.621120683 |
| -0.1797212 | cg14562086 | COL1A1      | 17 | 0.03906387 | 0.678552777 |
| -0.1238313 | cg14700325 | COL1A1      | 17 | 0.01175297 | 0.720432502 |
| -0.1749273 | cg18618815 | COL1A1      | 17 | 0.01636144 | 0.845569845 |
| -0.1145104 | cg08695855 | COL1A2      | 7  | 0.00126107 | 0.236091808 |
| -0.1302252 | cg23348014 | COL1A2      | 7  | 0.02836661 | 0.548375848 |
| -0.158816  | cg06299997 | COL1A2      | 7  | 0.00016884 | 0.513716838 |
| -0.1131906 | cg10368049 | COL1A2      | 7  | 0.0013563  | 0.596701281 |
| -0.1287336 | cg13079333 | COL20A1     | 20 | 0.0003395  | 0.353365926 |
| -0.1072058 | cg06485308 | COL23A1     | 5  | 0.02246377 | 0.614964123 |

|            |            |            |    |            |             |
|------------|------------|------------|----|------------|-------------|
| -0.2070267 | cg07427642 | COL23A1    | 5  | 0.02148442 | 0.521786051 |
| -0.1504355 | cg05008898 | COL23A1    | 5  | 0.00391737 | 0.689649445 |
| -0.1193795 | cg08760493 | COL25A1;CO | 4  | 0.03478345 | 0.67447299  |
| -0.1006504 | cg10275917 | COL28A1    | 7  | 0.02219476 | 0.493033022 |
| -0.1700641 | cg15379757 | COL4A1     | 13 | 0.04993845 | 0.678671745 |
| -0.1186849 | cg15416440 | COL4A1     | 13 | 0.02800302 | 0.467253936 |
| -0.1098719 | cg16436782 | COL4A1     | 13 | 0.01044927 | 0.898769108 |
| -0.2069195 | cg04887675 | COL4A1     | 13 | 0.0307711  | 0.573261686 |
| -0.1149164 | cg09238199 | COL4A2     | 13 | 0.0398567  | 0.849185341 |
| -0.1186123 | cg17453252 | COL4A2     | 13 | 0.00409826 | 0.844899472 |
| -0.1323423 | cg04815713 | COL4A2     | 13 | 0.00479207 | 0.77528025  |
| -0.1413951 | cg08009184 | COL4A2     | 13 | 0.03792756 | 0.730542289 |
| -0.1120867 | cg18114040 | COL4A2     | 13 | 0.04618696 | 0.817040715 |
| -0.1501463 | cg22332589 | COL4A2     | 13 | 0.000429   | 0.854517273 |
| -0.1050563 | cg01297370 | COL4A3;COL | 2  | 0.03019768 | 0.695459732 |
| -0.1557023 | cg13596370 | COL5A1     | 9  | 0.00617698 | 0.811114309 |
| -0.1400095 | cg10979567 | COL6A3;COL | 2  | 0.0233802  | 0.782877424 |
| -0.1661523 | cg22570757 | COL6A3;COL | 2  | 0.03996044 | 0.821003755 |
| -0.1797993 | cg21839588 | COL6A4P2   | 3  | 0.00088603 | 0.731185589 |
| -0.1229637 | cg21175685 | COL8A1;MIR | 3  | 0.00624753 | 0.737234465 |
| -0.1918669 | cg15818357 | COL8A2     | 1  | 0.01166233 | 0.312479918 |
| -0.1737911 | cg04487479 | COL9A1;COL | 6  | 0.01542096 | 0.809732202 |
| -0.1466966 | cg10809094 | COPS8;COPS | 2  | 0.03913753 | 0.711637709 |
| -0.1029257 | cg00876141 | CORIN      | 4  | 0.00171216 | 0.745331875 |
| -0.2809411 | cg09182455 | CORO1C     | 12 | 0.02751232 | 0.883093781 |
| -0.1795599 | cg13836518 | CORO2A;COF | 9  | 0.02824021 | 0.331224509 |
| -0.1705555 | cg23792308 | COX10      | 17 | 0.02714649 | 0.440956454 |
| -0.122064  | cg27005118 | COX10      | 17 | 0.03246689 | 0.684780138 |
| -0.1136923 | cg09363068 | COX19      | 7  | 0.02270721 | 0.389760854 |
| -0.1198892 | cg10423607 | CPA6;CPA6  | 8  | 0.01341478 | 0.773187199 |
| -0.2637913 | cg24238409 | CPEB3      | 10 | 0.02882391 | 0.583416119 |
| -0.1498377 | cg26426690 | CPEB3      | 10 | 0.01143272 | 0.717009344 |
| -0.1225052 | cg19464524 | CPEB3      | 10 | 0.00287514 | 0.3826434   |
| -0.1141334 | cg03110300 | CPLX4      | 18 | 0.00701519 | 0.370161847 |
| -0.1831642 | cg22881750 | CPNE5      | 6  | 8.11E-05   | 0.484232727 |
| -0.1533434 | cg23756264 | CPT1A;CPT1 | 11 | 0.01490406 | 0.752038819 |
| -0.1658427 | cg00233633 | CPVL;CPVL  | 7  | 0.0006377  | 0.5205011   |
| -0.1400974 | cg03073429 | CPXM2      | 10 | 0.00510577 | 0.611970235 |
| -0.1074152 | cg13573210 | CRB2       | 9  | 0.01657999 | 0.670124043 |
| -0.1034534 | cg00294109 | CRBN       | 3  | 0.00162435 | 0.292463524 |
| -0.1377141 | cg09498007 | CREG2      | 2  | 0.00189269 | 0.344710776 |
| -0.126973  | cg06495038 | CRHBP      | 5  | 0.00420021 | 0.669573632 |
| -0.1385365 | cg01972879 | CRHR2      | 7  | 0.04298099 | 0.71423642  |
| -0.1571642 | cg06618474 | CRIP1      | 14 | 0.01224308 | 0.38746898  |
| -0.138829  | cg00166343 | CRLF3      | 17 | 0.0117654  | 0.807434144 |
| -0.1378593 | cg07638320 | CRYL1      | 13 | 0.04596503 | 0.828229483 |

|            |            |             |    |            |             |
|------------|------------|-------------|----|------------|-------------|
| -0.13331   | cg26369418 | CSF2        | 5  | 0.00036668 | 0.479913156 |
| -0.1739523 | cg20450123 | CSGALNACT1  | 8  | 0.00172703 | 0.275927033 |
| -0.1554636 | cg14854503 | CSGALNACT1  | 8  | 0.03032582 | 0.715764422 |
| -0.2006094 | cg14722693 | CSGALNACT1  | 8  | 0.00445305 | 0.439970485 |
| -0.1555258 | cg06699216 | CSGALNACT1  | 8  | 0.00483401 | 0.836404531 |
| -0.1282261 | cg27255656 | CSMD1       | 8  | 0.01804264 | 0.816037899 |
| -0.1597172 | cg02630677 | CSMD1       | 8  | 0.02341062 | 0.594439392 |
| -0.2045485 | cg20564969 | CSMD1       | 8  | 0.00384527 | 0.346791564 |
| -0.1777709 | cg01136458 | CSMD1       | 8  | 0.00444174 | 0.497966125 |
| -0.1733358 | cg24759795 | CSMD3;CSMI  | 8  | 0.00044066 | 0.38237628  |
| -0.1459634 | cg21896766 | CSMD3;CSMI  | 8  | 0.00052921 | 0.494892226 |
| -0.1516139 | cg21813369 | CSN1S2B     | 4  | 0.01408663 | 0.437447984 |
| -0.2375394 | cg25581222 | CSNK1G1     | 15 | 0.00159069 | 0.748716507 |
| -0.1077126 | cg16357582 | CSRP1;CSRP1 | 1  | 0.02510132 | 0.553023898 |
| -0.1538305 | cg14538502 | CSRP2       | 12 | 0.04258237 | 0.793642699 |
| -0.1230811 | cg22238692 | CST4        | 20 | 0.02317611 | 0.53900322  |
| -0.1031986 | cg27526549 | CST7        | 20 | 0.00857214 | 0.811768734 |
| -0.1685439 | cg27641239 | CST7        | 20 | 0.02206918 | 0.840833365 |
| -0.1187299 | cg24168221 | CST9        | 20 | 0.0209184  | 0.65960893  |
| -0.1036034 | cg11897887 | CST9L       | 20 | 0.01900673 | 0.730375983 |
| -0.1416484 | cg18618429 | CSTA        | 3  | 0.00095635 | 0.456403482 |
| -0.1476905 | cg02694099 | CT62        | 15 | 0.00035277 | 0.633343095 |
| -0.1026433 | cg01589580 | CTDP1;CTDP: | 18 | 0.01483184 | 0.415424735 |
| -0.1732469 | cg12386061 | CTDSPL;CTDS | 3  | 0.0086579  | 0.35384638  |
| -0.1178378 | cg06968859 | CTNNA2;CTN  | 2  | 0.00956523 | 0.689173717 |
| -0.1320165 | cg14698665 | CTNND2      | 5  | 0.00870582 | 0.510296209 |
| -0.1325422 | cg14436231 | CTNS;CTNS   | 17 | 0.017007   | 0.366294742 |
| -0.1072194 | cg03206537 | CTSA;CTSA;C | 20 | 0.00458725 | 0.618650988 |
| -0.1365137 | cg01932691 | CTSG        | 14 | 0.02648217 | 0.551445555 |
| -0.1434823 | cg08416661 | CTSW        | 11 | 0.0074435  | 0.319097468 |
| -0.1500589 | cg19792802 | CTSW        | 11 | 0.00863859 | 0.508685489 |
| -0.1094733 | cg12831034 | CTSZ        | 20 | 0.00907447 | 0.553842205 |
| -0.1543196 | cg18563860 | CTSZ        | 20 | 0.01386822 | 0.885749166 |
| -0.1102488 | cg09315134 | CTSZ        | 20 | 0.00367951 | 0.55659162  |
| -0.1428742 | cg17928895 | CTSZ        | 20 | 0.01357406 | 0.877098816 |
| -0.2062557 | cg23679724 | CTSZ        | 20 | 0.00426782 | 0.470378339 |
| -0.165206  | cg18245281 | CTSZ        | 20 | 0.03480457 | 0.806606567 |
| -0.1028472 | cg12787553 | CTSZ        | 20 | 0.00268735 | 0.793157619 |
| -0.1609455 | cg00520378 | CTU2;CTU2;F | 16 | 0.00116601 | 0.482336194 |
| -0.1736308 | cg25913882 | CUBN        | 10 | 0.04097096 | 0.791066973 |
| -0.1653695 | cg22900075 | CUEDC1      | 17 | 0.01735849 | 0.580225246 |
| -0.1632491 | cg19368016 | CUGBP2;CUC  | 10 | 0.03569574 | 0.803520836 |
| -0.1547332 | cg18940274 | CUL1        | 7  | 0.00918904 | 0.907587794 |
| -0.1390899 | cg19391535 | CUL1        | 7  | 0.04119582 | 0.400554665 |
| -0.1226963 | cg23261443 | CUX1;CUX1;C | 7  | 0.00769519 | 0.560100356 |
| -0.117469  | cg23253053 | CUX2        | 12 | 0.01022347 | 0.57202265  |

|            |            |              |    |            |             |
|------------|------------|--------------|----|------------|-------------|
| -0.1120709 | cg16721194 | CUX2         | 12 | 0.00039822 | 0.508105984 |
| -0.1603346 | cg25113157 | CUX2         | 12 | 0.00216283 | 0.478421593 |
| -0.1378245 | cg08944961 | CUX2         | 12 | 0.00093223 | 0.591814799 |
| -0.1268378 | cg24130739 | CX3CR1;CX3C  | 3  | 0.00046265 | 0.63835948  |
| -0.1067118 | cg03296370 | CX3CR1;CX3C  | 3  | 0.00016369 | 0.324633366 |
| -0.1250364 | cg06662476 | CXCL13       | 4  | 0.03799712 | 0.606386073 |
| -0.108487  | cg18956547 | CXCR1        | 2  | 0.00217677 | 0.298895354 |
| -0.1572974 | cg10591797 | CXCR2;CXCR4  | 2  | 0.0237442  | 0.757834593 |
| -0.1526375 | cg13739417 | CXCR2;CXCR4  | 2  | 0.02441741 | 0.704457524 |
| -0.1356285 | cg25941354 | CXCR2;CXCR4  | 2  | 0.01089914 | 0.609438553 |
| -0.1288125 | cg23374992 | CXCR4;CXCR4  | 2  | 0.01062628 | 0.691424104 |
| -0.1053348 | cg12595667 | CXCR4;CXCR4  | 2  | 0.00506958 | 0.66670622  |
| -0.1512637 | cg01257799 | CXCR5        | 11 | 0.00073873 | 0.439476422 |
| -0.2399891 | cg25098174 | CYB561;CYBE  | 17 | 0.02488264 | 0.607334328 |
| -0.2177503 | cg18499750 | CYB561;CYBE  | 17 | 0.00832318 | 0.775607743 |
| -0.1379798 | cg04294383 | CYFIP1;CYFIP | 15 | 0.02508185 | 0.873833466 |
| -0.1110729 | cg24844518 | CYFIP2;CYFIP | 5  | 0.00541969 | 0.637854565 |
| -0.1062389 | cg20073007 | CYP11B1;CYF  | 8  | 0.00112537 | 0.384120474 |
| -0.1050986 | cg07954324 | CYP11B2      | 8  | 0.00159665 | 0.420880402 |
| -0.2655324 | cg02162897 | CYP1B1       | 2  | 0.0174186  | 0.807205483 |
| -0.1698882 | cg00565882 | CYP1B1       | 2  | 0.00218432 | 0.520200296 |
| -0.1059271 | cg06264984 | CYP1B1       | 2  | 3.61E-05   | 0.635844606 |
| -0.104307  | cg14717122 | CYP2C8       | 10 | 0.01151954 | 0.828053121 |
| -0.1007425 | cg06579354 | CYP2F1       | 19 | 0.00342011 | 0.613972914 |
| -0.1109056 | cg19430423 | CYP2S1       | 19 | 0.00140385 | 0.504870918 |
| -0.1066492 | cg17461336 | CYP3A43;CYF  | 7  | 0.01031726 | 0.659820325 |
| -0.18133   | cg20299573 | CYP4A11      | 1  | 0.00079596 | 0.452363089 |
| -0.1253408 | cg07512206 | CYP4F8       | 19 | 0.00297432 | 0.599244151 |
| -0.117899  | cg24768595 | CYTH1;CYTH4  | 17 | 0.03421872 | 0.734377074 |
| -0.1179735 | cg11859594 | CYTH1;CYTH4  | 17 | 0.00187808 | 0.840489116 |
| -0.1587808 | cg12741639 | CYTH4        | 22 | 0.03013343 | 0.732894382 |
| -0.1055933 | cg07103201 | CYTSB;CYTSB  | 17 | 0.00342346 | 0.851379411 |
| -0.1372714 | cg21637761 | CYTSB;CYTSB  | 17 | 0.00346456 | 0.664519953 |
| -0.1211104 | cg15898414 | DAB1         | 1  | 0.03418598 | 0.688656803 |
| -0.1023195 | cg22525715 | DAB1;MIR54   | 1  | 0.04804987 | 0.661702613 |
| -0.1020192 | cg11810743 | DACT2        | 6  | 0.02849029 | 0.74282079  |
| -0.143548  | cg19815574 | DACT3        | 19 | 0.00145895 | 0.495069125 |
| -0.1375972 | cg15602972 | DACT3        | 19 | 0.00622214 | 0.667860546 |
| -0.123037  | cg23976388 | DAGLA        | 11 | 0.00527534 | 0.581068649 |
| -0.129236  | cg25406518 | DAK;DDB1     | 11 | 0.02745357 | 0.520672337 |
| -0.1233109 | cg05557266 | DALRD3;DAL   | 3  | 0.00963752 | 0.502301398 |
| -0.1596826 | cg21244322 | DAPK2        | 15 | 0.02152269 | 0.761932996 |
| -0.184965  | cg06398236 | DAPP1        | 4  | 0.01797433 | 0.633427894 |
| -0.1524043 | cg10397389 | DAPP1;DAPP   | 4  | 0.02025219 | 0.754901797 |
| -0.2253588 | cg18552413 | DARC;DARC;I  | 1  | 0.00426202 | 0.347105433 |
| -0.1869101 | cg09365002 | DAXX;DAXX;I  | 6  | 0.03308513 | 0.782953982 |

|            |            |             |    |            |             |
|------------|------------|-------------|----|------------|-------------|
| -0.10337   | cg09597022 | DAXX;DAXX;I | 6  | 0.0165705  | 0.778552862 |
| -0.1021409 | cg03911306 | DAZL        | 3  | 0.04954728 | 0.844240238 |
| -0.1183782 | cg22697517 | DBF4B;DBF4I | 17 | 0.00171238 | 0.482070258 |
| -0.1643173 | cg11151251 | DCAF5       | 14 | 0.01983202 | 0.738008773 |
| -0.1085265 | cg21572000 | DCAF5       | 14 | 0.01048521 | 0.760620711 |
| -0.1676879 | cg02575483 | DCBLD1      | 6  | 0.02609941 | 0.694434733 |
| -0.1087813 | cg02595061 | DCDC1       | 11 | 0.00983238 | 0.713620468 |
| -0.1650285 | cg08107960 | DCDC2       | 6  | 0.00766769 | 0.270620771 |
| -0.2248905 | cg23991274 | DCK         | 4  | 0.0155803  | 0.805091741 |
| -0.1277307 | cg08514408 | DCK         | 4  | 0.01060757 | 0.4597361   |
| -0.1135113 | cg23574583 | DCLK1       | 13 | 0.01713667 | 0.720418313 |
| -0.1662595 | cg15001032 | DDC;DDC     | 7  | 0.0117155  | 0.420852928 |
| -0.1781207 | cg11502844 | DDX1        | 2  | 0.02339674 | 0.656586608 |
| -0.1342494 | cg05883128 | DDX60       | 4  | 0.00023192 | 0.555043396 |
| -0.1039306 | cg27040700 | DECR1       | 8  | 0.04192001 | 0.850625849 |
| -0.1461546 | cg14013103 | DEDD2       | 19 | 0.00372883 | 0.522484923 |
| -0.1037753 | cg14189583 | DEDD2       | 19 | 0.00178879 | 0.576025202 |
| -0.152457  | cg11721464 | DEDD2       | 19 | 0.00302372 | 0.730087031 |
| -0.1100965 | cg04747619 | DEFA5       | 8  | 0.0227506  | 0.495788161 |
| -0.1361843 | cg10076006 | DEFB1       | 8  | 0.02040546 | 0.352157721 |
| -0.2052437 | cg13700506 | DEFB116     | 20 | 0.03598209 | 0.489571406 |
| -0.1841264 | cg03262887 | DEFB119;DEF | 20 | 0.00421546 | 0.308266499 |
| -0.1632225 | cg12807628 | DEFB135     | 8  | 0.00353726 | 0.339919966 |
| -0.137543  | cg05226729 | DEFB135     | 8  | 0.01408931 | 0.809957675 |
| -0.2271775 | cg22743884 | DEFB135     | 8  | 0.01095481 | 0.80683059  |
| -0.1763376 | cg12279138 | DEGS1;DEGS  | 1  | 0.01126116 | 0.380631009 |
| -0.1123347 | cg21986966 | DENND1C     | 19 | 0.01852405 | 0.632200146 |
| -0.1342318 | cg08936307 | DENND1C     | 19 | 0.01152994 | 0.462680751 |
| -0.1341593 | cg08864105 | DENND2D     | 1  | 0.0123661  | 0.846368504 |
| -0.1300632 | cg02920600 | DGKI        | 7  | 0.00286125 | 0.57317666  |
| -0.1054609 | cg02211741 | DGKZ;DGKZ;I | 11 | 0.01479823 | 0.749228671 |
| -0.1098292 | cg01132064 | DGKZ;DGKZ;I | 11 | 0.01221135 | 0.714503406 |
| -0.1067051 | cg07092212 | DGKZ;DGKZ;I | 11 | 0.00479817 | 0.718095022 |
| -0.1179292 | cg10177197 | DHCR24      | 1  | 0.01601614 | 0.790293452 |
| -0.1017242 | cg13624631 | DHRS7       | 14 | 0.00010417 | 0.233222877 |
| -0.1314548 | cg06582708 | DHRS7B      | 17 | 0.04739297 | 0.679693743 |
| -0.1352677 | cg22129276 | DHRS9;DHRS  | 2  | 0.00705798 | 0.616187174 |
| -0.1144457 | cg13775636 | DIP2C       | 10 | 0.02632381 | 0.669173025 |
| -0.2022733 | cg12724894 | DIP2C       | 10 | 0.00173711 | 0.443769387 |
| -0.2027048 | cg04097334 | DIRC1       | 2  | 0.01974579 | 0.502062569 |
| -0.1146523 | cg08467371 | DIS3L2      | 2  | 0.0433563  | 0.428758187 |
| -0.1692194 | cg07328664 | DIS3L2      | 2  | 0.00203614 | 0.778209514 |
| -0.1075224 | cg00550040 | DKFZp566F09 | 19 | 0.01661362 | 0.683033989 |
| -0.1345477 | cg27395342 | DLC1;DLC1   | 8  | 0.00052332 | 0.400665442 |
| -0.1030578 | cg15681239 | DLEC1;DLEC1 | 3  | 0.00335247 | 0.758761451 |
| -0.1154406 | cg14093720 | DLGAP1;DLG  | 18 | 0.03435579 | 0.641448167 |

|            |            |             |    |            |             |
|------------|------------|-------------|----|------------|-------------|
| -0.161741  | cg05455971 | DLGAP2      | 8  | 0.01164314 | 0.792145214 |
| -0.126424  | cg03439898 | DLGAP2      | 8  | 0.03185962 | 0.851593544 |
| -0.1822694 | cg27199697 | DLX3        | 17 | 0.031705   | 0.705109977 |
| -0.1730203 | cg09730801 | DLX4;DLX4   | 17 | 0.00057273 | 0.696767313 |
| -0.1619284 | cg27016494 | DLX5        | 7  | 0.04279759 | 0.638225714 |
| -0.1526539 | cg26033466 | DLX6AS      | 7  | 0.04131393 | 0.416706812 |
| -0.1132798 | cg13619074 | DMRT1       | 9  | 0.01668251 | 0.56216252  |
| -0.1362143 | cg14377594 | DMRT2;DMR   | 9  | 0.00237407 | 0.684773781 |
| -0.1932451 | cg04361556 | DNAH6       | 2  | 0.02520094 | 0.502297801 |
| -0.107733  | cg12626882 | DNAH9;DNAI  | 17 | 0.01106771 | 0.63253038  |
| -0.2037516 | cg17950348 | DNAJB6      | 7  | 0.0293628  | 0.826959239 |
| -0.1536911 | cg07993586 | DNAJB6      | 7  | 0.03568092 | 0.917345611 |
| -0.1524148 | cg18245230 | DNAJB6      | 7  | 0.0096834  | 0.502909207 |
| -0.1214386 | cg22913903 | DNAJC22     | 12 | 0.00087971 | 0.38675696  |
| -0.1258904 | cg21763058 | DNAJC22     | 12 | 0.00020042 | 0.423538075 |
| -0.1179718 | cg07028869 | DNAJC22;DN  | 12 | 0.00022476 | 0.396688603 |
| -0.101784  | cg07197831 | DNAJC5G     | 2  | 0.04916364 | 0.525783253 |
| -0.1060185 | cg04197548 | DNAJC9      | 10 | 0.02708266 | 0.744110404 |
| -0.127164  | cg24163658 | DNASE1L3    | 3  | 0.00608043 | 0.52704604  |
| -0.1555389 | cg15503081 | DNASE2      | 19 | 0.02134278 | 0.605326981 |
| -0.1505326 | cg07802362 | DNM3;DNM3   | 1  | 0.02672945 | 0.762202498 |
| -0.1175907 | cg00050692 | DNMT3A;DN   | 2  | 0.01129799 | 0.846870397 |
| -0.1056127 | cg10491120 | DOCK1       | 10 | 0.03982332 | 0.791258993 |
| -0.1570971 | cg03752935 | DOCK1       | 10 | 0.01345892 | 0.722802522 |
| -0.1163771 | cg14939821 | DOCK1;FAM1  | 10 | 0.00338585 | 0.677750254 |
| -0.2200307 | cg25012185 | DOCK10      | 2  | 0.00077434 | 0.687165862 |
| -0.1608619 | cg05363955 | DOCK10      | 2  | 0.01186103 | 0.801160942 |
| -0.1537245 | cg11394600 | DOCK4       | 7  | 0.0087458  | 0.762319621 |
| -0.1437681 | cg06870470 | DOCK6       | 19 | 0.00147703 | 0.324103394 |
| -0.1143254 | cg09314421 | DOK2        | 8  | 0.00625544 | 0.480190558 |
| -0.1083934 | cg13292636 | DOK2        | 8  | 0.00109021 | 0.533846694 |
| -0.1831482 | cg02092181 | DOT1L       | 19 | 0.01540876 | 0.763865947 |
| -0.1412526 | cg20972466 | DPEP1       | 16 | 0.00157318 | 0.317354302 |
| -0.1234353 | cg16146353 | DPP10       | 2  | 0.0202921  | 0.70959404  |
| -0.1144689 | cg05868547 | DPP10       | 2  | 0.00943651 | 0.787632424 |
| -0.1293737 | cg02926033 | DPP6;DPP6;E | 7  | 0.00874324 | 0.700773286 |
| -0.1534157 | cg26187031 | DPYSL2      | 8  | 0.00162718 | 0.620510237 |
| -0.1176415 | cg21013206 | DRD2;DRD2   | 11 | 0.01496738 | 0.723244409 |
| -0.1016063 | cg09133032 | DRD4        | 11 | 0.01380677 | 0.266823454 |
| -0.1044389 | cg09386376 | DRD4        | 11 | 0.00819868 | 0.320769551 |
| -0.1403438 | cg20411756 | DRD4        | 11 | 0.00065936 | 0.735531125 |
| -0.2200479 | cg10094691 | DSCAM       | 21 | 0.02894293 | 0.7055688   |
| -0.2032559 | cg07027502 | DSCR6       | 21 | 0.00203113 | 0.445735948 |
| -0.1111186 | cg27422507 | DSG2        | 18 | 0.01577804 | 0.715485929 |
| -0.1030843 | cg12596273 | DSG2        | 18 | 0.00781348 | 0.660374579 |
| -0.1463419 | cg17759095 | DST         | 6  | 0.02802755 | 0.704968062 |

|            |            |              |    |            |             |
|------------|------------|--------------|----|------------|-------------|
| -0.1202985 | cg02790691 | DTNA;DTNA;   | 18 | 0.03923166 | 0.567926185 |
| -0.1253939 | cg25784280 | DTNA;DTNA;   | 18 | 0.02222661 | 0.818173499 |
| -0.123391  | cg25446789 | DTNB;DTNB;   | 2  | 0.00140499 | 0.2707892   |
| -0.1207279 | cg20236089 | DTNBP1;DTN   | 6  | 0.00051497 | 0.254560781 |
| -0.1864894 | cg11938455 | DTNBP1;DTN   | 6  | 0.01604627 | 0.767079422 |
| -0.1854585 | cg08941873 | DTWD2        | 5  | 0.02705704 | 0.61319308  |
| -0.1477811 | cg07946977 | DUSP10;DUS   | 1  | 0.02506343 | 0.844064708 |
| -0.1006119 | cg10270150 | DUSP22       | 6  | 0.02928295 | 0.558169177 |
| -0.1235571 | cg27449114 | DUSP28       | 2  | 0.00141139 | 0.370476088 |
| -0.1202654 | cg10080966 | DUSP5        | 10 | 0.03197183 | 0.314614398 |
| -0.1311202 | cg02927679 | DUSP5        | 10 | 0.02824182 | 0.49506942  |
| -0.1180656 | cg09357462 | DUSP5        | 10 | 0.0262903  | 0.570726443 |
| -0.1161895 | cg03290131 | DUSP5        | 10 | 0.00808333 | 0.384974895 |
| -0.1532212 | cg13691961 | DUSP6;DUSP   | 12 | 0.02749525 | 0.846897409 |
| -0.1215724 | cg17740822 | DUSP6;DUSP   | 12 | 0.00033877 | 0.315191313 |
| -0.1028292 | cg05769889 | DUSP6;DUSP   | 12 | 0.00079563 | 0.328369294 |
| -0.1103677 | cg27365701 | DUSP6;DUSP   | 12 | 0.0045804  | 0.6754014   |
| -0.1026242 | cg13460297 | DYNC1I2      | 2  | 0.01969115 | 0.805134315 |
| -0.1162592 | cg04457354 | E2F3         | 6  | 0.03598502 | 0.663257198 |
| -0.176927  | cg23214755 | E2F6;E2F6;E2 | 2  | 0.01478644 | 0.886156089 |
| -0.1147225 | cg17726575 | E2F6;E2F6;E2 | 2  | 0.00176431 | 0.725704908 |
| -0.1304058 | cg02930866 | EBF1         | 3  | 0.00033557 | 0.608979603 |
| -0.2112586 | cg00594129 | EBF1         | 5  | 0.01861595 | 0.38221828  |
| -0.1704513 | cg21211213 | EBF1         | 5  | 0.02839145 | 0.300947025 |
| -0.1367233 | cg11898646 | EBF1         | 5  | 0.03535464 | 0.815092779 |
| -0.1413956 | cg00210856 | EBF1         | 5  | 0.04075935 | 0.801949658 |
| -0.140208  | cg20944195 | EBF2         | 8  | 0.00264757 | 0.295575394 |
| -0.1300375 | cg07616828 | EBF2         | 8  | 0.00462823 | 0.379534095 |
| -0.1105225 | cg05487589 | EBF2         | 8  | 3.77E-05   | 0.605939397 |
| -0.184369  | cg07194839 | EBF3         | 10 | 0.04527079 | 0.734095954 |
| -0.1756265 | cg04582254 | EBF3         | 10 | 0.01869297 | 0.840083648 |
| -0.1664718 | cg15491701 | EBF3         | 10 | 0.01855725 | 0.770585751 |
| -0.1556814 | cg03497907 | EBF3         | 10 | 0.00257034 | 0.669485733 |
| -0.1512906 | cg16592658 | EBI3         | 19 | 0.00689375 | 0.754879783 |
| -0.147398  | cg21005416 | ECE1;ECE1;E  | 1  | 0.03016159 | 0.487269993 |
| -0.1273955 | cg13527631 | ECE2         | 3  | 0.00131583 | 0.495094987 |
| -0.1141276 | cg16386293 | ECM1;ECM1    | 1  | 0.0056951  | 0.53985207  |
| -0.1116615 | cg05618426 | EDNRA;EDNF   | 4  | 0.0249603  | 0.455634138 |
| -0.1093449 | cg16264526 | EDNRA;EDNF   | 4  | 0.02381543 | 0.653823384 |
| -0.1056807 | cg10112943 | EDNRA;EDNF   | 4  | 0.0007702  | 0.65532638  |
| -0.2221802 | cg21307723 | EFCAB2;EFC   | 1  | 0.0086426  | 0.564242115 |
| -0.1498615 | cg00133624 | EFCAB4B;EFC  | 12 | 6.34E-05   | 0.459333903 |
| -0.1131445 | cg08187425 | EFHD1        | 2  | 0.00920335 | 0.663507176 |
| -0.1982046 | cg16975639 | EFHD1;EFHD   | 2  | 0.03239101 | 0.62835222  |
| -0.2390686 | cg25978218 | EFHD2        | 1  | 0.01090194 | 0.876588989 |
| -0.2232209 | cg14036402 | EFHD2        | 1  | 0.00683039 | 0.787697805 |

|            |            |              |    |            |             |
|------------|------------|--------------|----|------------|-------------|
| -0.1780186 | cg20256153 | EFNB2        | 13 | 0.0085592  | 0.381115158 |
| -0.1101041 | cg18919106 | EFR3A        | 8  | 0.00669998 | 0.373541497 |
| -0.2029405 | cg08964756 | EFR3A        | 8  | 0.03339476 | 0.824654621 |
| -0.1526118 | cg10578782 | EGFLAM;EGF   | 5  | 0.03938432 | 0.673858028 |
| -0.1138499 | cg12476044 | EGFLAM;EGF   | 5  | 0.01375164 | 0.750195635 |
| -0.1100079 | cg24723373 | EGFR         | 7  | 0.01409285 | 0.800906766 |
| -0.1271985 | cg10601026 | EGR2         | 10 | 0.01565361 | 0.652163156 |
| -0.1119935 | cg01332279 | EGR2         | 10 | 0.01856885 | 0.8133465   |
| -0.1426545 | cg08810842 | EGR3         | 8  | 0.00036482 | 0.793255389 |
| -0.107022  | cg09374353 | EHD1         | 11 | 0.01967583 | 0.708683877 |
| -0.1335344 | cg05150973 | EHD1         | 11 | 0.04143007 | 0.778340749 |
| -0.149765  | cg17344040 | EHD1         | 11 | 0.00683878 | 0.555469444 |
| -0.112595  | cg11321083 | EHD1         | 11 | 0.0019497  | 0.493133883 |
| -0.1562556 | cg00648955 | EHD3         | 2  | 0.04682202 | 0.571399375 |
| -0.2557459 | cg22451412 | EHD4         | 15 | 0.02129694 | 0.770942996 |
| -0.2252599 | cg17244218 | EHD4         | 15 | 0.01071909 | 0.591281089 |
| -0.2154667 | cg10071442 | EHMT2;EHM    | 6  | 0.02891475 | 0.423826224 |
| -0.2130261 | cg25506915 | EIF3G        | 19 | 0.0287448  | 0.69491399  |
| -0.2056156 | cg08822118 | EIF4G1;EIF4C | 3  | 0.00720342 | 0.592535563 |
| -0.2041575 | cg08106706 | ELAVL4;ELAV  | 1  | 0.03363974 | 0.230785657 |
| -0.2027182 | cg21067652 | ELF1;ELF1    | 13 | 0.00407982 | 0.308576416 |
| -0.202152  | cg02632314 | ELF1;ELF1    | 13 | 0.00447527 | 0.556591681 |
| -0.2003854 | cg01440489 | ELF1;ELF1    | 13 | 0.00360069 | 0.502292835 |
| -0.1927857 | cg15050051 | ELFN1        | 7  | 0.01163054 | 0.710184587 |
| -0.1903638 | cg00107982 | ELFN2        | 22 | 0.00036111 | 0.31415727  |
| -0.1895767 | cg01291854 | ELK3         | 12 | 0.02285412 | 0.694278658 |
| -0.1841397 | cg01119452 | ELMO1        | 7  | 0.0034389  | 0.500761937 |
| -0.1840234 | cg18390025 | ELOVL3       | 10 | 0.00634112 | 0.616824118 |
| -0.1821739 | cg02859516 | ELOVL6;ELOV  | 4  | 0.03333821 | 0.549088917 |
| -0.1787354 | cg06591011 | ELOVL6;ELOV  | 4  | 0.02646793 | 0.763539134 |
| -0.1772211 | cg10512376 | EMCN;EMCN    | 4  | 0.00590156 | 0.802705592 |
| -0.1759573 | cg17272549 | EML6         | 2  | 0.03346706 | 0.802976277 |
| -0.175202  | cg08314781 | EML6         | 2  | 0.00034495 | 0.709808654 |
| -0.1747526 | cg19009132 | EMP1         | 12 | 0.0233187  | 0.776761756 |
| -0.1741782 | cg09712682 | EMP2         | 16 | 0.01391536 | 0.860437224 |
| -0.1726734 | cg05731801 | EMP2         | 16 | 0.01788566 | 0.739130172 |
| -0.1725808 | cg04103514 | EMR2;EMR2;   | 19 | 0.03427087 | 0.550845327 |
| -0.166191  | cg07998554 | EMR3         | 19 | 0.03106465 | 0.711062525 |
| -0.1593022 | cg15746620 | EMR3         | 19 | 0.02121857 | 0.609658191 |
| -0.1552254 | cg14845689 | EMX2;EMX2    | 10 | 0.01322842 | 0.520271111 |
| -0.1532784 | cg00603371 | EMX2;EMX2C   | 10 | 0.00422232 | 0.407222029 |
| -0.1513322 | cg15367892 | EMX2OS       | 10 | 0.00071007 | 0.62734203  |
| -0.1508071 | cg16353851 | ENC1         | 5  | 0.00182238 | 0.408063713 |
| -0.146509  | cg08261525 | ENOX1        | 13 | 0.01071756 | 0.477806573 |
| -0.1458183 | cg11978634 | ENOX1;ENOX   | 13 | 0.029001   | 0.69577071  |
| -0.1432888 | cg01661247 | ENPP1        | 6  | 0.0307166  | 0.509388486 |



|            |            |              |    |            |             |
|------------|------------|--------------|----|------------|-------------|
| -0.141643  | cg10332003 | ENPP6        | 4  | 0.00396177 | 0.826899528 |
| -0.1368634 | cg20623350 | ENTHD1       | 22 | 0.02673675 | 0.510219447 |
| -0.1356549 | cg13471990 | ENTPD1;ENT   | 10 | 5.47E-05   | 0.291825909 |
| -0.1353885 | cg11637005 | ENTPD1;ENT   | 10 | 0.0034206  | 0.277218511 |
| -0.1350411 | cg15896259 | ENTPD4;ENT   | 8  | 0.02712832 | 0.366750026 |
| -0.1338039 | cg04712321 | ENTPD4;ENT   | 8  | 0.00969548 | 0.437039877 |
| -0.1316914 | cg12492900 | EP400        | 12 | 0.00256301 | 0.706941612 |
| -0.129884  | cg21211882 | EPB41L1;EPB  | 20 | 0.01673845 | 0.538798683 |
| -0.1282116 | cg06459104 | EPB41L3      | 18 | 0.02187314 | 0.427942809 |
| -0.127522  | cg13678551 | EPB41L4B;EP  | 9  | 0.00716393 | 0.39840523  |
| -0.1250346 | cg03292675 | EPB49;EPB49  | 8  | 0.00077627 | 0.436864883 |
| -0.1217524 | cg02046552 | EPB49;EPB49  | 8  | 0.00044653 | 0.555930375 |
| -0.1199056 | cg15141868 | EPDR1        | 7  | 0.01656196 | 0.676148522 |
| -0.119383  | cg10835083 | EPHA4        | 2  | 0.00214589 | 0.74298211  |
| -0.1161082 | cg11197061 | EPHA6        | 3  | 0.00023849 | 0.271925989 |
| -0.1155352 | cg15000071 | EPHB1        | 3  | 0.01705144 | 0.619082809 |
| -0.1136609 | cg01970336 | EPS15        | 1  | 0.00275012 | 0.618345142 |
| -0.11343   | cg23953052 | EPS8L1       | 19 | 0.03663957 | 0.551744839 |
| -0.111469  | cg04784316 | ERBB4;ERBB4  | 2  | 0.04705994 | 0.491675058 |
| -0.1108036 | cg03507641 | ERC1;ERC1;E  | 12 | 0.00367157 | 0.312137318 |
| -0.1092033 | cg03927470 | ERCC4        | 16 | 0.01964721 | 0.877478001 |
| -0.1081719 | cg04163967 | ERG;ERG;ERC  | 21 | 0.01278356 | 0.836129876 |
| -0.1065701 | cg18413706 | ERG;ERG;ERC  | 21 | 0.00277446 | 0.555658201 |
| -0.1055739 | cg09582351 | ERGIC2       | 12 | 0.02044594 | 0.620386858 |
| -0.1026067 | cg22709362 | ERI3         | 1  | 0.00274168 | 0.853649633 |
| -0.1010613 | cg21918595 | ERI3         | 1  | 0.00114854 | 0.319243139 |
| -0.2334943 | cg13582028 | ERICH1       | 8  | 0.04085167 | 0.541433094 |
| -0.2037521 | cg21211780 | ESPN         | 1  | 0.01304079 | 0.713065663 |
| -0.1934466 | cg00917101 | ESPN         | 1  | 1.98E-05   | 0.485519115 |
| -0.1918339 | cg09039163 | ESPNL;ESPNL  | 2  | 0.00443233 | 0.533418984 |
| -0.1910737 | cg06574296 | ESPNL;SCLY   | 2  | 0.00074716 | 0.763231656 |
| -0.1896486 | cg04003327 | ESPNL;SCLY   | 2  | 0.00618519 | 0.79067142  |
| -0.185722  | cg22364729 | ESPNP        | 1  | 0.00331082 | 0.766682754 |
| -0.1767682 | cg01395667 | ESPNP        | 1  | 0.02232953 | 0.409580583 |
| -0.1755852 | cg21608605 | ESR1;ESR1;ES | 6  | 0.03208915 | 0.308521788 |
| -0.1688808 | cg03037684 | ESR1;ESR1;ES | 6  | 0.00237561 | 0.490040857 |
| -0.1617298 | cg07059469 | ESR1;ESR1;ES | 6  | 0.00050351 | 0.639363944 |
| -0.1585452 | cg07392702 | ESYT2        | 7  | 0.00908342 | 0.541324103 |
| -0.1534687 | cg21464115 | ESYT3        | 3  | 0.01455198 | 0.663442784 |
| -0.1409139 | cg23738760 | ETV6         | 12 | 0.02828256 | 0.800582278 |
| -0.11076   | cg00610577 | ETV6         | 12 | 0.01141456 | 0.852141955 |
| -0.1043747 | cg21223094 | ETV6         | 12 | 0.00132119 | 0.314874409 |
| -0.1176031 | cg11655490 | ETV6         | 12 | 0.00115479 | 0.698418228 |
| -0.1932463 | cg05582310 | EVC          | 4  | 0.01533214 | 0.822436737 |
| -0.1155446 | cg20992708 | EVC2;EVC2    | 4  | 0.02625084 | 0.783628462 |
| -0.1427617 | cg26674479 | EVX1         | 7  | 0.03231746 | 0.840786679 |

|            |            |             |    |            |             |
|------------|------------|-------------|----|------------|-------------|
| -0.1320983 | cg06544111 | EVX1        | 7  | 0.04665478 | 0.750460827 |
| -0.1191135 | cg13677149 | EVX1        | 7  | 0.00042068 | 0.777498882 |
| -0.2434423 | cg27100227 | EVX1        | 7  | 0.03213241 | 0.702727508 |
| -0.1491218 | cg01357429 | EVX1        | 7  | 0.00500312 | 0.524522447 |
| -0.1348584 | cg17526483 | EVX1        | 7  | 0.00125706 | 0.808641417 |
| -0.1261066 | cg03056526 | EVX1        | 7  | 0.02082073 | 0.717211162 |
| -0.1095018 | cg22964918 | EVX1        | 7  | 0.00050419 | 0.671077797 |
| -0.1877509 | cg04922154 | EVX1        | 7  | 0.00175433 | 0.709288873 |
| -0.1871069 | cg08483376 | EVX1        | 7  | 0.0003561  | 0.447089818 |
| -0.1455841 | cg01544270 | EXD3        | 9  | 0.04075935 | 0.505352098 |
| -0.1229388 | cg25314360 | EXOC2;HUS1  | 6  | 0.04915341 | 0.812741519 |
| -0.1181621 | cg26008509 | EXOC3L2     | 19 | 0.00371424 | 0.572821193 |
| -0.1281221 | cg10679182 | EXOC4       | 7  | 0.0001657  | 0.534623703 |
| -0.1218255 | cg19350870 | EXOC6B      | 2  | 0.03337933 | 0.730162654 |
| -0.1321686 | cg15694987 | EXT1        | 8  | 0.03297787 | 0.428714072 |
| -0.1257537 | cg00328720 | EXTL3       | 8  | 0.00680395 | 0.90868567  |
| -0.1023998 | cg27589058 | EYA2;EYA2   | 20 | 0.01781864 | 0.336064844 |
| -0.118119  | cg18714224 | EYA4;EYA4;E | 6  | 0.00497112 | 0.596870918 |
| -0.1007267 | cg22871253 | EZR;EZR     | 6  | 0.00588459 | 0.362625353 |
| -0.1865422 | cg25720793 | F11R        | 1  | 0.04505102 | 0.473662708 |
| -0.1614087 | cg14714391 | F2R         | 5  | 0.02733954 | 0.753128495 |
| -0.2243809 | cg10431265 | FABP6;FABP6 | 5  | 0.01045891 | 0.418478907 |
| -0.1119364 | cg15140323 | FABP6;FABP6 | 5  | 0.0080204  | 0.343991178 |
| -0.1031945 | cg06856840 | FAH         | 15 | 0.00971605 | 0.658445132 |
| -0.2540887 | cg22511455 | FAIM3;FAIM3 | 1  | 0.00229588 | 0.32025804  |
| -0.199661  | cg23088126 | FAIM3;FAIM3 | 1  | 0.0025998  | 0.738769002 |
| -0.1586206 | cg06640279 | FAIM3;FAIM3 | 1  | 0.01511559 | 0.675852227 |
| -0.1127492 | cg15158847 | FAIM3;FAIM3 | 1  | 0.03106791 | 0.610629226 |
| -0.1319623 | cg23379806 | FAM107B     | 10 | 0.02644513 | 0.843104675 |
| -0.1188461 | cg15414028 | FAM107B     | 10 | 0.0005273  | 0.270525936 |
| -0.1220782 | cg14884828 | FAM107B     | 10 | 0.01289957 | 0.799416119 |
| -0.1153882 | cg16406078 | FAM110A;FA  | 20 | 0.00723982 | 0.392827671 |
| -0.1841001 | cg14170976 | FAM110A;FA  | 20 | 0.02663896 | 0.737440279 |
| -0.1605878 | cg06547285 | FAM113B     | 12 | 0.00132552 | 0.631178754 |
| -0.3421379 | cg25123566 | FAM113B;LO  | 12 | 0.00032535 | 0.631880376 |
| -0.1191828 | cg17320378 | FAM129C     | 19 | 0.0096191  | 0.493773697 |
| -0.1187184 | cg14041069 | FAM129C;FA  | 19 | 0.01616908 | 0.592817889 |
| -0.1371563 | cg10809485 | FAM150A     | 8  | 0.00108372 | 0.215736003 |
| -0.1021888 | cg14553740 | FAM154A     | 9  | 0.03739696 | 0.820232985 |
| -0.1053082 | cg01403030 | FAM154A     | 9  | 0.00625422 | 0.726660831 |
| -0.1035942 | cg08188268 | FAM160B1    | 10 | 0.02175532 | 0.563317375 |
| -0.1333308 | cg01302668 | FAM162B     | 6  | 0.00767251 | 0.580709756 |
| -0.1031892 | cg15683970 | FAM165B     | 21 | 0.02319678 | 0.829336232 |
| -0.1366173 | cg02771117 | FAM167A;C8  | 8  | 0.00396644 | 0.302665496 |
| -0.171558  | cg06358322 | FAM171A1    | 10 | 0.03430284 | 0.846060975 |
| -0.1622518 | cg04304121 | FAM179A     | 2  | 0.03154049 | 0.727261965 |

|            |            |              |    |            |             |
|------------|------------|--------------|----|------------|-------------|
| -0.1365199 | cg17875584 | FAM186A      | 12 | 0.0162193  | 0.806091318 |
| -0.1384038 | cg13436110 | FAM188B      | 7  | 0.00239149 | 0.825672675 |
| -0.1700617 | cg17051704 | FAM189A1     | 15 | 0.01093946 | 0.279255778 |
| -0.1018665 | cg15319470 | FAM19A2      | 12 | 0.03101653 | 0.660088521 |
| -0.1471061 | cg15734409 | FAM19A4;FA   | 3  | 0.04816921 | 0.509486007 |
| -0.1525615 | cg05006211 | FAM19A5      | 22 | 0.0254141  | 0.542822424 |
| -0.106344  | cg05072413 | FAM19A5;FA   | 22 | 0.00272127 | 0.404435124 |
| -0.1045114 | cg14596108 | FAM19A5;FA   | 22 | 0.00408028 | 0.897933044 |
| -0.1743298 | cg08859215 | FAM20A       | 17 | 0.01592327 | 0.777223515 |
| -0.1917469 | cg10183671 | FAM20C       | 7  | 0.01478644 | 0.742824757 |
| -0.1688154 | cg12354014 | FAM26D;BET   | 6  | 0.00093133 | 0.329089681 |
| -0.1223887 | cg18406700 | FAM26E;BET   | 6  | 0.00245392 | 0.698714897 |
| -0.1068845 | cg00167275 | FAM35A;GLL   | 10 | 0.00400386 | 0.203289575 |
| -0.1068806 | cg08798862 | FAM38A       | 16 | 0.01417062 | 0.83186203  |
| -0.1112824 | cg02187259 | FAM49A       | 2  | 0.03320117 | 0.884325995 |
| -0.1008059 | cg14741228 | FAM60A;FAM   | 12 | 0.0424768  | 0.760106446 |
| -0.1469096 | cg03935116 | FAM60A;FAM   | 12 | 0.00929055 | 0.774144939 |
| -0.1104128 | cg27050407 | FAM65B       | 6  | 0.00647228 | 0.67916781  |
| -0.142833  | cg08893087 | FAM69A       | 1  | 0.00690636 | 0.642221369 |
| -0.1115687 | cg19566774 | FAM71D       | 14 | 0.00817507 | 0.28694203  |
| -0.1504398 | cg02809404 | FAM71D       | 14 | 0.00468098 | 0.307115026 |
| -0.1058637 | cg16689937 | FAM71D;FAM   | 14 | 0.0003098  | 0.43813436  |
| -0.1933329 | cg10624729 | FAM73A       | 1  | 0.00626219 | 0.825900674 |
| -0.1871395 | cg17936488 | FAM78A       | 9  | 0.04588644 | 0.847534067 |
| -0.150509  | cg13487445 | FAM78A       | 9  | 0.01572686 | 0.750671102 |
| -0.1297429 | cg00831735 | FAM83A;FAM   | 8  | 0.02273206 | 0.552330651 |
| -0.1266197 | cg08256536 | FAM83A;FAM   | 8  | 0.01167678 | 0.655379204 |
| -0.2095395 | cg27649094 | FAM83A;LOC   | 8  | 0.02909101 | 0.594674251 |
| -0.2022277 | cg20283107 | FAM91A1      | 8  | 0.00599005 | 0.781205468 |
| -0.1612483 | cg12570309 | FARSA        | 19 | 0.00457147 | 0.456060995 |
| -0.1307999 | cg26478401 | FAS;FAS;FAS; | 10 | 0.03821632 | 0.538522601 |
| -0.1173884 | cg01483139 | FAT1         | 4  | 0.00262792 | 0.874171953 |
| -0.1104091 | cg07107113 | FBLIM1       | 1  | 0.00863983 | 0.667467927 |
| -0.1104312 | cg00651497 | FBN1         | 15 | 0.00165457 | 0.882384976 |
| -0.2029508 | cg18158306 | FBRSL1       | 12 | 0.00591948 | 0.633182949 |
| -0.196611  | cg11155002 | FBXL18       | 7  | 0.01375664 | 0.871365135 |
| -0.1095803 | cg19641327 | FBXL7        | 5  | 0.0385047  | 0.624494384 |
| -0.112029  | cg03531326 | FBXO17;FBXC  | 19 | 0.00569155 | 0.709425217 |
| -0.1698181 | cg12897164 | FBXO32;FBXC  | 8  | 0.00141139 | 0.452529199 |
| -0.1056154 | cg20924136 | FBXO36       | 2  | 0.01359805 | 0.532767943 |
| -0.1491274 | cg08580308 | FBXO36       | 2  | 0.00471928 | 0.59772286  |
| -0.1398365 | cg05904901 | FBXO41       | 2  | 0.00169634 | 0.680212157 |
| -0.1998984 | cg04973915 | FBXW11;FBX   | 5  | 0.00795362 | 0.705536631 |
| -0.1900662 | cg03192919 | FBXW12;FBX   | 3  | 0.0182636  | 0.790832646 |
| -0.149021  | cg10011799 | FBXW2;LOC4   | 9  | 0.00390268 | 0.667236923 |
| -0.1276258 | cg15565057 | FCAMR;FCAN   | 1  | 0.0036152  | 0.61650105  |

|            |            |               |    |            |             |
|------------|------------|---------------|----|------------|-------------|
| -0.1626462 | cg20806175 | FCER1G        | 1  | 0.01007321 | 0.288407266 |
| -0.1566231 | cg24465943 | FCER1G        | 1  | 0.01037023 | 0.603107901 |
| -0.1295668 | cg09773499 | FCER2         | 19 | 0.00061137 | 0.322365997 |
| -0.2007743 | cg19103704 | FCGBP         | 19 | 0.00040856 | 0.452444544 |
| -0.1335856 | cg27470554 | FCGR2A;FCG    | 1  | 0.03135466 | 0.514170028 |
| -0.1454304 | cg04384208 | FCGR3A;FCG    | 1  | 0.03398437 | 0.654101293 |
| -0.2137217 | cg26435281 | FCGR3B        | 1  | 0.0013563  | 0.404256448 |
| -0.1547134 | cg11263420 | FCGRT;FCGR    | 19 | 0.01917992 | 0.689894034 |
| -0.1449164 | cg24783510 | FCHO1;FCHO    | 19 | 0.03069067 | 0.786581869 |
| -0.1299833 | cg08206267 | FCHO1;FCHO    | 19 | 0.00583145 | 0.787120831 |
| -0.1071946 | cg11529819 | FCN3;FCN3     | 1  | 0.01079827 | 0.612772888 |
| -0.108555  | cg08933467 | FCRL1;FCRL1   | 1  | 0.00152272 | 0.508716226 |
| -0.1044983 | cg09340639 | FCRL1;FCRL1   | 1  | 0.0091554  | 0.495858356 |
| -0.2591865 | cg05777583 | FCRL2         | 1  | 0.00033508 | 0.525358717 |
| -0.1560057 | cg17134153 | FCRL3         | 1  | 0.01988813 | 0.774136711 |
| -0.1134205 | cg00160981 | FCRLB         | 1  | 0.00215765 | 0.552783065 |
| -0.1004121 | cg05215310 | FEM1A         | 19 | 0.02678133 | 0.452470943 |
| -0.1932745 | cg16174681 | FER           | 5  | 0.00099592 | 0.623677384 |
| -0.1777419 | cg20890440 | FER1L6        | 8  | 0.00259933 | 0.782658842 |
| -0.1500915 | cg07718903 | FERMT1        | 20 | 0.00275215 | 0.585021099 |
| -0.1466424 | cg15692360 | FERMT1        | 20 | 0.00495062 | 0.593283745 |
| -0.1267101 | cg26758396 | FERMT1        | 20 | 0.00068869 | 0.661938719 |
| -0.1180982 | cg01647936 | FERMT3;FERI   | 11 | 0.00482998 | 0.365596571 |
| -0.1124775 | cg07682037 | FERMT3;FERI   | 11 | 0.03513808 | 0.746995241 |
| -0.1483248 | cg06330618 | FES;FES;FES;F | 15 | 0.01277625 | 0.611338825 |
| -0.1613252 | cg03548857 | FFAR2         | 19 | 0.02922724 | 0.828906461 |
| -0.1422223 | cg21640432 | FFAR2         | 19 | 0.044333   | 0.74277498  |
| -0.138562  | cg17244340 | FGD2;FGD2     | 6  | 0.00127444 | 0.453857703 |
| -0.1203435 | cg13724550 | FGF1;FGF1;F   | 5  | 0.01378902 | 0.494117009 |
| -0.1161808 | cg07620573 | FGF12         | 3  | 0.04306487 | 0.545183598 |
| -0.1146135 | cg26328626 | FGF12;FGF12   | 3  | 0.003901   | 0.755397565 |
| -0.1056985 | cg19746186 | FGGY;FGGY     | 1  | 0.02193069 | 0.828530908 |
| -0.104583  | cg11587640 | FGR           | 1  | 0.01786732 | 0.686093466 |
| -0.1020632 | cg03055021 | FHAD1         | 1  | 0.01630475 | 0.716327932 |
| -0.1241214 | cg24038105 | FHAD1         | 1  | 0.025754   | 0.656366027 |
| -0.1434297 | cg00004700 | FHL2;FHL2;F   | 2  | 0.01710834 | 0.895825954 |
| -0.1193898 | cg19586143 | FHOD3         | 18 | 0.02327723 | 0.783178546 |
| -0.1014631 | cg22851781 | FIBCD1;FIBCI  | 9  | 0.02457281 | 0.834018513 |
| -0.1033206 | cg13447566 | FIBCD1;FIBCI  | 9  | 0.01841521 | 0.798501085 |
| -0.143275  | cg19652483 | FILIP1        | 6  | 0.02740907 | 0.441579553 |
| -0.2479224 | cg19482025 | FLI1          | 11 | 0.00448577 | 0.394498813 |
| -0.14514   | cg01681098 | FLI1;FLI1     | 11 | 0.00023192 | 0.754992836 |
| -0.1248321 | cg03199745 | FLJ12825      | 12 | 0.00105657 | 0.81052058  |
| -0.1376901 | cg11795276 | FLJ12825      | 12 | 0.02097007 | 0.447032166 |
| -0.1229739 | cg00753676 | FLJ13197      | 4  | 0.00263798 | 0.757970998 |
| -0.1213928 | cg05626226 | FLJ20184      | 4  | 0.00746499 | 0.641000054 |

|            |            |              |    |            |             |
|------------|------------|--------------|----|------------|-------------|
| -0.1142802 | cg05675514 | FLJ22536     | 6  | 0.00467523 | 0.794939611 |
| -0.207815  | cg06429439 | FLJ22536     | 6  | 0.01031233 | 0.549725117 |
| -0.2180838 | cg16804603 | FLJ22536     | 6  | 0.01224875 | 0.791363948 |
| -0.1611371 | cg02832512 | FLJ22536     | 6  | 0.00732857 | 0.738895708 |
| -0.1254553 | cg05570258 | FLJ23834     | 7  | 0.04891562 | 0.659483509 |
| -0.1702487 | cg19583379 | FLJ35220;FLJ | 17 | 0.02666729 | 0.607858555 |
| -0.1274873 | cg19025461 | FLJ37453     | 1  | 0.0066384  | 0.785316047 |
| -0.1064913 | cg02579959 | FLJ42289;FLJ | 15 | 0.00822    | 0.553637661 |
| -0.1091327 | cg06661057 | FLJ42627     | 16 | 0.01986032 | 0.469288776 |
| -0.1270738 | cg19797741 | FLJ42709;FLJ | 5  | 0.04784964 | 0.552746484 |
| -0.1456409 | cg02150354 | FLJ42709;FLJ | 5  | 0.02544737 | 0.499276507 |
| -0.1442373 | cg19980151 | FLJ42709;FLJ | 5  | 0.02228354 | 0.584943522 |
| -0.1412106 | cg12166662 | FLJ42709;FLJ | 5  | 0.01161195 | 0.572435573 |
| -0.1174055 | cg11648730 | FLJ42709;FLJ | 5  | 0.00034133 | 0.71290466  |
| -0.1142943 | cg08732466 | FLJ42875;FLJ | 1  | 0.00620584 | 0.810857842 |
| -0.129319  | cg06991974 | FLJ42875;FLJ | 1  | 0.00160315 | 0.562573538 |
| -0.1225915 | cg07946633 | FLJ42875;PRI | 1  | 0.00588981 | 0.496346784 |
| -0.2068553 | cg12194336 | FLNB;FLNB;FL | 3  | 0.00744491 | 0.460618607 |
| -0.109078  | cg19402236 | FLT1;FLT1;FL | 13 | 0.01351689 | 0.780598819 |
| -0.1567441 | cg22226821 | FMN2         | 1  | 0.04081732 | 0.626461399 |
| -0.2849586 | cg13966628 | FMN2         | 1  | 0.0204503  | 0.532375891 |
| -0.1195971 | cg11251367 | FMN2         | 1  | 0.0263798  | 0.445693403 |
| -0.1339292 | cg12805374 | FMNL1        | 17 | 0.02219884 | 0.466534811 |
| -0.1509753 | cg00612751 | FMNL2        | 2  | 0.03770884 | 0.71896496  |
| -0.2870942 | cg02054252 | FMNL3;FMNL   | 12 | 0.01079668 | 0.719308335 |
| -0.269244  | cg04070601 | FMNL3;FMNL   | 12 | 0.0015281  | 0.434405136 |
| -0.2424777 | cg22803510 | FNBP1L;FNBP  | 1  | 0.01668336 | 0.605562532 |
| -0.2419515 | cg07739841 | FNDC1        | 6  | 0.04608023 | 0.78933997  |
| -0.228619  | cg14513071 | FOXD2;FOXD   | 1  | 0.0306846  | 0.786501508 |
| -0.2004117 | cg02490736 | FOXF2        | 6  | 0.00269238 | 0.512946174 |
| -0.170993  | cg15141195 | FOXF2        | 6  | 0.01349775 | 0.796771555 |
| -0.1646967 | cg16087093 | FOXI1;FOXI1  | 5  | 0.00466373 | 0.885849525 |
| -0.1593377 | cg00661485 | FOXI1;FOXI1  | 5  | 0.02927091 | 0.56038359  |
| -0.151429  | cg17083575 | FOXK1        | 7  | 0.02418887 | 0.309823884 |
| -0.1317446 | cg04261496 | FOXK1        | 7  | 0.00882229 | 0.812646146 |
| -0.1316617 | cg02116768 | FOXK2        | 17 | 0.02347421 | 0.611291436 |
| -0.1037195 | cg08645670 | FOXL1        | 16 | 0.00643139 | 0.683063565 |
| -0.1004288 | cg26958524 | FOXL1        | 16 | 0.00898612 | 0.81631918  |
| -0.1936449 | cg00584450 | FOXL1;FOXL1  | 16 | 0.00446668 | 0.705223159 |
| -0.1370487 | cg18569623 | FOXN3;FOXN   | 14 | 0.04639365 | 0.818600682 |
| -0.1172906 | cg14023350 | FOXN3;FOXN   | 14 | 0.00665111 | 0.726299978 |
| -0.119458  | cg07109046 | FOXO1        | 13 | 0.03256646 | 0.809277037 |
| -0.200507  | cg02202169 | FOXO1        | 13 | 0.03490087 | 0.501205468 |
| -0.1728503 | cg10696351 | FOXO1        | 13 | 0.00628678 | 0.313646704 |
| -0.1672915 | cg06175008 | FOXP1        | 3  | 0.00440142 | 0.816996071 |
| -0.140956  | cg17803993 | FOXP1;FOXP   | 3  | 0.04551682 | 0.340038768 |

|            |            |             |    |            |             |
|------------|------------|-------------|----|------------|-------------|
| -0.1406165 | cg07368857 | FOXP1;FOXP: | 3  | 0.01245915 | 0.847592808 |
| -0.1388697 | cg25356639 | FOXP1;FOXP: | 3  | 0.01059703 | 0.775656359 |
| -0.1222995 | cg09611620 | FOXP1;FOXP: | 3  | 0.01221208 | 0.82363235  |
| -0.1007513 | cg13492245 | FPGS;FPGS   | 9  | 0.01709726 | 0.44288551  |
| -0.1590119 | cg22152605 | FPR1        | 19 | 0.01130336 | 0.655672198 |
| -0.1194537 | cg16052198 | FPR2        | 19 | 0.04204574 | 0.45279734  |
| -0.1588802 | cg02102872 | FRAS1;FRAS1 | 4  | 0.0176322  | 0.603237556 |
| -0.1154696 | cg25996663 | FRK         | 6  | 0.01093575 | 0.69219451  |
| -0.1200899 | cg09684112 | FRMD4A      | 10 | 0.00172912 | 0.752671537 |
| -0.1153105 | cg23037642 | FRMD4A      | 10 | 0.04200768 | 0.508276304 |
| -0.1591847 | cg03355808 | FRMD4A      | 10 | 0.00332753 | 0.490775876 |
| -0.1717071 | cg11377213 | FRMD4B      | 3  | 0.00198434 | 0.397537743 |
| -0.2087638 | cg02886077 | FRYL        | 4  | 0.04520134 | 0.327566431 |
| -0.1986296 | cg13672638 | FSD1L;FSD1L | 9  | 0.00609284 | 0.452516501 |
| -0.1196426 | cg17685019 | FSHB;FSHB   | 11 | 0.00265137 | 0.675761418 |
| -0.1077592 | cg15195495 | FSTL3       | 19 | 0.01382093 | 0.507313524 |
| -0.1416348 | cg01664151 | FSTL4       | 5  | 0.02826806 | 0.772512807 |
| -0.1173955 | cg19005955 | FSTL4       | 5  | 0.01027243 | 0.612202605 |
| -0.1155832 | cg02544257 | FUK         | 16 | 0.00092844 | 0.246768779 |
| -0.1152549 | cg19348484 | FURIN       | 15 | 0.00624453 | 0.540523681 |
| -0.1038758 | cg13300301 | FUT4;FUT4   | 11 | 0.04087852 | 0.408775749 |
| -0.1522268 | cg17682828 | FXYD1;FXYD1 | 19 | 0.00342006 | 0.546196613 |
| -0.1074584 | cg08130572 | FYN;FYN     | 6  | 0.0036499  | 0.666822146 |
| -0.1065316 | cg19744498 | FZD5        | 2  | 0.01115848 | 0.790689697 |
| -0.1058121 | cg19957162 | FZD5        | 2  | 0.00133236 | 0.448306599 |
| -0.1028837 | cg07434244 | GOS2        | 1  | 0.00842373 | 0.635234139 |
| -0.1999639 | cg18724037 | GABRA5;GAE  | 15 | 0.01949418 | 0.437795755 |
| -0.1790667 | cg22672790 | GABRA6;GAE  | 5  | 0.03573059 | 0.467568933 |
| -0.1478669 | cg11026604 | GABRB3      | 15 | 0.04223672 | 0.716122319 |
| -0.1358259 | cg03942042 | GABRB3;GAE  | 15 | 0.00648924 | 0.697496894 |
| -0.2350607 | cg10311132 | GABRB3;GAE  | 15 | 0.00365654 | 0.434650304 |
| -0.1334952 | cg04847273 | GABRD       | 1  | 0.00468098 | 0.470612357 |
| -0.1858354 | cg24087944 | GABRD       | 1  | 0.00177863 | 0.611192759 |
| -0.1679654 | cg09205438 | GABRG3      | 15 | 0.01770285 | 0.751959463 |
| -0.1528759 | cg19816354 | GABRG3      | 15 | 0.00088839 | 0.366433954 |
| -0.1034669 | cg16741573 | GALNT1      | 18 | 0.00172042 | 0.275392357 |
| -0.1015517 | cg13579752 | GALNT10     | 5  | 0.00337707 | 0.829079178 |
| -0.1421323 | cg18311633 | GALNT13     | 2  | 0.00040832 | 0.432146721 |
| -0.2321042 | cg12723251 | GALNT2      | 1  | 0.00959799 | 0.363370306 |
| -0.2194887 | cg24308604 | GALNT7      | 4  | 0.02501062 | 0.362311487 |
| -0.1170671 | cg11334728 | GALNT9      | 12 | 0.03619574 | 0.660869744 |
| -0.1166645 | cg20064897 | GALNT9      | 12 | 0.01054779 | 0.622901334 |
| -0.1422311 | cg26453169 | GAPT        | 5  | 0.04126857 | 0.576677948 |
| -0.2429651 | cg11430077 | GATA3;GATA  | 10 | 0.03717993 | 0.827959742 |
| -0.1838032 | cg03125765 | GATSL3      | 22 | 0.00532709 | 0.416344877 |
| -0.1594313 | cg19257864 | GBA;GBA;GB  | 1  | 0.00149392 | 0.214028219 |

|            |            |            |    |            |             |
|------------|------------|------------|----|------------|-------------|
| -0.1195072 | cg16387581 | GCH1;GCH1; | 14 | 0.00793586 | 0.787384391 |
| -0.154076  | cg18492943 | GCK        | 7  | 0.01215842 | 0.700285016 |
| -0.2018847 | cg08931515 | GCM1       | 6  | 0.00327376 | 0.608743981 |
| -0.1446559 | cg13411789 | GCNT2      | 6  | 0.00464224 | 0.419533204 |
| -0.147285  | cg05989312 | GCOM1;GCO  | 15 | 0.02099274 | 0.390223457 |
| -0.247123  | cg20043937 | GCOM1;GCO  | 15 | 0.02415565 | 0.521966737 |
| -0.1028085 | cg22956254 | GDF3       | 12 | 0.02631518 | 0.401186897 |
| -0.1616568 | cg12163407 | GDF3       | 12 | 0.02430455 | 0.536877608 |
| -0.1194768 | cg16290866 | GDF6       | 8  | 0.00102957 | 0.30112469  |
| -0.1866722 | cg07046818 | GDF6       | 8  | 0.01150764 | 0.45131799  |
| -0.1596181 | cg15006881 | GDF6       | 8  | 0.01007071 | 0.419749435 |
| -0.2585264 | cg04365123 | GDF6       | 8  | 0.00016132 | 0.59165714  |
| -0.1311899 | cg27141850 | GDF7       | 2  | 0.04143838 | 0.74652874  |
| -0.142933  | cg12930882 | GDNF;GDNF; | 5  | 0.00673448 | 0.268325789 |
| -0.1578249 | cg02331025 | GDNF;GDNF; | 5  | 0.00569357 | 0.710479803 |
| -0.1313547 | cg19622474 | GDNF;GDNF; | 5  | 0.0143046  | 0.784067457 |
| -0.1048279 | cg15368455 | GDNF;GDNF; | 5  | 0.00694497 | 0.388340415 |
| -0.1184817 | cg08268692 | GDPD4      | 11 | 0.0434319  | 0.686635653 |
| -0.1141875 | cg13002506 | GDPD4      | 11 | 0.0056348  | 0.751765562 |
| -0.1369013 | cg16874185 | GDPD5      | 11 | 0.01324421 | 0.833382013 |
| -0.2807053 | cg01522592 | GDPD5      | 11 | 0.00157503 | 0.764916231 |
| -0.1270295 | cg09120267 | GEFT;GEFT  | 12 | 0.02109333 | 0.638252219 |
| -0.1422853 | cg12271079 | GFRA1;GFRA | 10 | 0.02761842 | 0.478910553 |
| -0.124855  | cg10922232 | GGA3;GGA3  | 17 | 0.01178417 | 0.321454752 |
| -0.1063658 | cg24670151 | GGA3;MRPS  | 17 | 0.01648236 | 0.355450216 |
| -0.1036566 | cg06306927 | GHDC;GHDC; | 17 | 0.0026545  | 0.364337664 |
| -0.1942231 | cg13053608 | GHDC;GHDC; | 17 | 0.04357434 | 0.648756605 |
| -0.1445017 | cg08468689 | GHDC;GHDC; | 17 | 0.00117861 | 0.412348721 |
| -0.140907  | cg05844788 | GHRL;GHRL; | 3  | 0.00067726 | 0.515309268 |
| -0.1386167 | cg03751527 | GHRL;GHRL; | 3  | 0.0405168  | 0.727897172 |
| -0.1868709 | cg03920999 | GHRLOS;GHF | 3  | 0.0274351  | 0.792963794 |
| -0.1417207 | cg23513930 | GHRLOS;GHF | 3  | 0.00314272 | 0.804961926 |
| -0.128655  | cg12210293 | GIMAP1     | 7  | 0.00640472 | 0.599410018 |
| -0.2297257 | cg20795023 | GIMAP1     | 7  | 0.00045549 | 0.403591845 |
| -0.1682156 | cg08960815 | GIMAP4     | 7  | 0.00140817 | 0.728194014 |
| -0.1208294 | cg03334072 | GIMAP5     | 7  | 0.00432223 | 0.796650524 |
| -0.1177773 | cg13043509 | GIMAP5;GIM | 7  | 0.007636   | 0.39292921  |
| -0.1136494 | cg07319528 | GIMAP5;GIM | 7  | 0.00417725 | 0.541416387 |
| -0.1171899 | cg24249248 | GIMAP5;GIM | 7  | 0.00305247 | 0.443806274 |
| -0.1186517 | cg11541382 | GIMAP6;GIM | 7  | 0.00027163 | 0.588138363 |
| -0.1590861 | cg03490881 | GIMAP6;GIM | 7  | 0.04792063 | 0.686250059 |
| -0.1687657 | cg15849098 | GIMAP7     | 7  | 0.01268526 | 0.799284904 |
| -0.1224701 | cg07956751 | GIMAP7     | 7  | 0.04674998 | 0.301211499 |
| -0.1055539 | cg24413842 | GIMAP7     | 7  | 0.01280091 | 0.587099975 |
| -0.1506643 | cg03801183 | GIMAP7     | 7  | 0.01136374 | 0.645238108 |
| -0.1920392 | cg00051483 | GIMAP7     | 7  | 3.61E-05   | 0.431719156 |

|            |            |              |    |            |             |
|------------|------------|--------------|----|------------|-------------|
| -0.1211669 | cg17643598 | GIMAP7       | 7  | 8.93E-07   | 0.495305416 |
| -0.1043485 | cg25597797 | GIPC3        | 19 | 0.00256511 | 0.360715298 |
| -0.1330508 | cg00510437 | GIT2;GIT2;GI | 12 | 0.03123332 | 0.572001708 |
| -0.1054872 | cg02173484 | GJA5         | 1  | 0.00256225 | 0.783329435 |
| -0.124858  | cg07999953 | GJB3;GJB3    | 1  | 0.03579894 | 0.628734396 |
| -0.1584073 | cg12630277 | GJD4         | 10 | 0.00991805 | 0.655573557 |
| -0.1349631 | cg09071093 | GLI1;GLI1;GL | 12 | 0.00479705 | 0.475614837 |
| -0.2848261 | cg06679990 | GLI1;GLI1;GL | 12 | 0.00925854 | 0.592004454 |
| -0.1287568 | cg13500029 | GLIPR1       | 12 | 0.02657327 | 0.840120061 |
| -0.1154465 | cg06596075 | GLIPR1L1     | 12 | 0.00296672 | 0.193784648 |
| -0.151468  | cg13168314 | GLIS1        | 1  | 2.96E-05   | 0.407417454 |
| -0.1355635 | cg24741609 | GLIS1        | 1  | 0.00031619 | 0.417495573 |
| -0.1098171 | cg14325112 | GLIS3;GLIS3  | 9  | 0.00554547 | 0.621660106 |
| -0.1266678 | cg11650648 | GLP2R        | 17 | 0.03676163 | 0.674721077 |
| -0.1047378 | cg22747507 | GLRA3;GLRA   | 4  | 0.03286977 | 0.572538377 |
| -0.1031373 | cg03852144 | GLRX;GLRX    | 5  | 0.00191143 | 0.191318224 |
| -0.1543487 | cg22689909 | GLRX;GLRX    | 5  | 3.75E-05   | 0.325982983 |
| -0.1106002 | cg16677191 | GLRX;GLRX    | 5  | 0.00059972 | 0.696355102 |
| -0.1294468 | cg18131582 | GLT25D2      | 1  | 0.0026514  | 0.710813808 |
| -0.1601085 | cg27642528 | GLUD1        | 10 | 0.01002355 | 0.641167685 |
| -0.1075994 | cg18551877 | GLYATL2      | 11 | 0.0090985  | 0.669767803 |
| -0.1227151 | cg01708377 | GMDS         | 6  | 0.0124988  | 0.775273524 |
| -0.1835167 | cg17514766 | GMFG         | 19 | 0.01490159 | 0.812993055 |
| -0.1547513 | cg27360210 | GMFG         | 19 | 0.00251867 | 0.764955875 |
| -0.1546146 | cg05607401 | GMFG;GMFC    | 19 | 0.01761486 | 0.7074958   |
| -0.1171275 | cg09569432 | GMFG;GMFC    | 19 | 0.00064112 | 0.344384318 |
| -0.2408008 | cg20650545 | GMFG;GMFC    | 19 | 0.0039499  | 0.409415974 |
| -0.2313752 | cg20381182 | GMPR         | 6  | 0.02140343 | 0.438966676 |
| -0.2181109 | cg11967765 | GNA12        | 7  | 0.01893013 | 0.72241416  |
| -0.2154265 | cg26924967 | GNA15        | 19 | 0.00434589 | 0.537494575 |
| -0.1998307 | cg25418001 | GNAI1        | 7  | 0.0237442  | 0.648766991 |
| -0.1928379 | cg23699918 | GNASAS       | 20 | 0.00419955 | 0.793989196 |
| -0.1854147 | cg10309886 | GNASAS       | 20 | 0.01173077 | 0.786109541 |
| -0.1820172 | cg03030267 | GNASAS;MIR   | 20 | 0.00245012 | 0.846818173 |
| -0.1792737 | cg01919999 | GNB2L1       | 5  | 0.01791171 | 0.656836652 |
| -0.1790657 | cg14120436 | GNB5         | 15 | 0.02246377 | 0.711834222 |
| -0.1679794 | cg08038054 | GNG11        | 7  | 0.00253979 | 0.291002734 |
| -0.1676834 | cg17168836 | GNG12        | 1  | 0.02893715 | 0.650859004 |
| -0.1674654 | cg25217276 | GNG4;GNG4;   | 1  | 0.01705402 | 0.804445173 |
| -0.1654819 | cg08134671 | GNG7         | 19 | 0.01377288 | 0.636799562 |
| -0.1652465 | cg04603130 | GNG7         | 19 | 0.00088136 | 0.277045844 |
| -0.1647321 | cg27221477 | GNL1         | 6  | 0.00398586 | 0.289970713 |
| -0.1642825 | cg10996111 | GNL1         | 6  | 0.00516186 | 0.380282186 |
| -0.163879  | cg01687189 | GNPTAB       | 12 | 0.02090483 | 0.506772254 |
| -0.150582  | cg15058852 | GNS          | 12 | 0.0439296  | 0.508483003 |
| -0.1498748 | cg18963763 | GOLGA7B      | 10 | 0.02245443 | 0.386857168 |



|            |            |             |    |            |             |
|------------|------------|-------------|----|------------|-------------|
| -0.1490828 | cg02389590 | GOLSYN;GOL  | 8  | 0.03634263 | 0.490965249 |
| -0.1461474 | cg08987251 | GOT2        | 16 | 0.01675075 | 0.880017692 |
| -0.1427579 | cg16627786 | GP1BB;SEPT  | 22 | 0.00592099 | 0.754293593 |
| -0.1388746 | cg23787873 | GP1BB;SEPT  | 22 | 0.00379383 | 0.79771314  |
| -0.1379885 | cg02357751 | GP1BB;SEPT  | 22 | 0.00444698 | 0.811149612 |
| -0.1317278 | cg16210718 | GP1BB;SEPT  | 22 | 0.00052651 | 0.735151735 |
| -0.1251626 | cg03263514 | GP1BB;SEPT  | 22 | 0.00415034 | 0.785995786 |
| -0.123166  | cg07359545 | GP1BB;SEPT  | 22 | 0.00432281 | 0.641506331 |
| -0.1220642 | cg14880079 | GP5         | 3  | 0.0093651  | 0.591650333 |
| -0.11961   | cg02462353 | GP6;GP6     | 19 | 0.00207283 | 0.703241461 |
| -0.1113487 | cg25818583 | GP6;GP6     | 19 | 0.00260487 | 0.802431213 |
| -0.1112993 | cg02565999 | GPC6        | 13 | 0.00328561 | 0.861393102 |
| -0.1103927 | cg25580198 | GPIHBP1     | 8  | 0.00490262 | 0.505977758 |
| -0.1101992 | cg09012091 | GPLD1       | 6  | 0.01772717 | 0.681209458 |
| -0.1087822 | cg20012537 | GPR123      | 10 | 0.00211032 | 0.593196712 |
| -0.1085152 | cg19700872 | GPR151      | 5  | 0.01497203 | 0.428197845 |
| -0.1068968 | cg25586410 | GPR155;GPR  | 2  | 0.02583526 | 0.429512297 |
| -0.1002142 | cg09623018 | GPR158      | 10 | 0.04905188 | 0.489418508 |
| -0.1480215 | cg20597477 | GPR176      | 15 | 0.01731847 | 0.59539039  |
| -0.144763  | cg23078123 | GPR177      | 1  | 0.02314878 | 0.670462484 |
| -0.138851  | cg16110541 | GPR177;GPR  | 1  | 0.00522904 | 0.773690704 |
| -0.190422  | cg24002158 | GPR20       | 8  | 0.0483099  | 0.608132514 |
| -0.1451557 | cg14039479 | GPR26       | 10 | 0.0296981  | 0.798885019 |
| -0.1054748 | cg25285053 | GPR31       | 6  | 0.01614526 | 0.581258833 |
| -0.1069999 | cg05875421 | GPR68       | 14 | 0.00595398 | 0.685817734 |
| -0.1099826 | cg15361750 | GPR77       | 19 | 0.01019536 | 0.793188673 |
| -0.1066028 | cg01988891 | GPR84       | 12 | 0.00972926 | 0.823970882 |
| -0.2048237 | cg18723553 | GPSM3       | 6  | 0.01511462 | 0.53367155  |
| -0.1263165 | cg23859630 | GPSM3       | 6  | 0.00233083 | 0.486656894 |
| -0.1133187 | cg18642234 | GPX1;GPX1;C | 3  | 0.01584288 | 0.534708958 |
| -0.1720369 | cg19168192 | GPX5;GPX5   | 6  | 0.04957816 | 0.645347244 |
| -0.2158152 | cg12280901 | GPX5;GPX5   | 6  | 0.03222501 | 0.637413027 |
| -0.1446729 | cg23936402 | GPX5;GPX5   | 6  | 0.01717987 | 0.340241784 |
| -0.1334211 | cg23824666 | GPX5;GPX5   | 6  | 0.0317545  | 0.762308576 |
| -0.1058669 | cg26170660 | GPX5;GPX5   | 6  | 0.00427774 | 0.512621372 |
| -0.1144029 | cg11241750 | GRAMD3      | 5  | 0.03880519 | 0.403975119 |
| -0.1629272 | cg03840259 | GRAP2       | 22 | 0.01397006 | 0.728425338 |
| -0.115446  | cg26203383 | GRAP2       | 22 | 0.00254751 | 0.718660717 |
| -0.1289625 | cg06611426 | GRASP       | 12 | 0.00220513 | 0.495490411 |
| -0.1650009 | cg19374752 | GRASP       | 12 | 0.00187332 | 0.469002935 |
| -0.1139993 | cg12358041 | GRB10;GRB1  | 7  | 0.01600194 | 0.469609573 |
| -0.1074314 | cg16281600 | GRIA1;GRIA1 | 5  | 0.03113458 | 0.370910153 |
| -0.1556355 | cg24351003 | GRID1       | 10 | 0.00595913 | 0.511537149 |
| -0.1072548 | cg13396607 | GRIK2;GRIK2 | 6  | 0.02378612 | 0.749265375 |
| -0.2281932 | cg08106961 | GRIK3       | 1  | 4.99E-05   | 0.26802571  |
| -0.1005125 | cg04016326 | GRIN2B;GRIN | 12 | 0.02404452 | 0.597342565 |

|            |            |             |    |            |             |
|------------|------------|-------------|----|------------|-------------|
| -0.1117266 | cg24030173 | GRIN2D      | 19 | 0.01686875 | 0.673167998 |
| -0.121792  | cg15580458 | GRK5        | 10 | 0.00393321 | 0.826007917 |
| -0.1347263 | cg24902461 | GRK5        | 10 | 0.00493181 | 0.457455625 |
| -0.1304952 | cg12363682 | GRM6        | 5  | 0.03121561 | 0.719585997 |
| -0.184079  | cg21032008 | GRM7;GRM7   | 3  | 0.00453093 | 0.320871894 |
| -0.1534894 | cg24294950 | GRM8;GRM8   | 7  | 0.00102382 | 0.403417194 |
| -0.1440592 | cg10469791 | GRXCR1      | 4  | 0.00396286 | 0.592526563 |
| -0.1169909 | cg05316065 | GSDMC;GSDI  | 8  | 0.00015383 | 0.274948718 |
| -0.1437169 | cg05123333 | GSG1L       | 16 | 0.00076717 | 0.529431043 |
| -0.1293319 | cg06882571 | GSG1L;GSG1L | 16 | 0.00944765 | 0.498025329 |
| -0.1573252 | cg06049177 | GSR         | 8  | 0.01032212 | 0.79451356  |
| -0.1187625 | cg08305799 | GSR         | 8  | 0.0230154  | 0.719651957 |
| -0.2056453 | cg04340502 | GSTA3       | 6  | 0.00801939 | 0.731219992 |
| -0.1131889 | cg27343684 | GSTA3       | 6  | 0.00879948 | 0.792206972 |
| -0.160484  | cg25866895 | GSTP1       | 11 | 0.00395384 | 0.751302047 |
| -0.1773563 | cg23725454 | GSTP1       | 11 | 0.03232589 | 0.386863969 |
| -0.140145  | cg10248878 | GSX2        | 4  | 0.02228354 | 0.789334169 |
| -0.2059544 | cg11566152 | GTF2E1      | 3  | 0.04482154 | 0.739202531 |
| -0.1493466 | cg18325315 | GTF2IRD1;GT | 7  | 0.01411179 | 0.688467437 |
| -0.114904  | cg22579828 | GTSF1L;GTSF | 20 | 0.02119285 | 0.577798306 |
| -0.1193587 | cg09212118 | GUCA2A      | 1  | 0.00121665 | 0.642749351 |
| -0.1053839 | cg13725803 | GUCY1B2     | 13 | 0.01321065 | 0.492924891 |
| -0.175648  | cg24013213 | GUCY1B2     | 13 | 0.02049537 | 0.774674592 |
| -0.1051653 | cg20911180 | GUCY2E      | 11 | 0.02633804 | 0.755061253 |
| -0.120888  | cg24772388 | GYPC;GYPC   | 2  | 0.00033491 | 0.379524763 |
| -0.1262088 | cg06745001 | GYS1;GYS1;G | 19 | 0.01524277 | 0.428341342 |
| -0.1005414 | cg06118312 | GZMA        | 5  | 0.00292781 | 0.717579132 |
| -0.1527468 | cg03875678 | GZMB        | 14 | 0.0006377  | 0.32029345  |
| -0.2004742 | cg16356013 | H2AFY;H2AF' | 5  | 0.02185059 | 0.795704056 |
| -0.1323446 | cg14418802 | H6PD        | 1  | 0.002972   | 0.749751227 |
| -0.1099457 | cg22491680 | HAL         | 12 | 0.03697659 | 0.858112888 |
| -0.1044648 | cg03719032 | HAPLN4      | 19 | 0.00922131 | 0.533846261 |
| -0.1384343 | cg07664183 | HAUS6       | 9  | 0.04795017 | 0.514864984 |
| -0.1842988 | cg17484237 | HAVCR2;HAV  | 5  | 0.00765173 | 0.738812654 |
| -0.1484917 | cg15371617 | HAVCR2;HAV  | 5  | 0.00162118 | 0.714865643 |
| -0.1017064 | cg09751515 | HBD         | 11 | 0.00043795 | 0.783646249 |
| -0.1220634 | cg26306638 | HBEGF       | 5  | 0.02433977 | 0.662258608 |
| -0.1373518 | cg26729101 | HBQ1        | 16 | 0.04930331 | 0.687349992 |
| -0.1359506 | cg25590114 | HCCA2       | 11 | 0.02309241 | 0.46504882  |
| -0.134911  | cg07715909 | HCCA2       | 11 | 0.00147804 | 0.438448473 |
| -0.1082097 | cg08261871 | HCCA2       | 11 | 0.0257503  | 0.798557051 |
| -0.1007935 | cg04938738 | HCCA2       | 11 | 0.02787982 | 0.756853634 |
| -0.1139496 | cg13376953 | HCCA2       | 11 | 0.00752062 | 0.521577265 |
| -0.1131098 | cg19866040 | HCCA2;KRTA  | 11 | 0.00861279 | 0.415870567 |
| -0.1631773 | cg08240778 | HCCA2;KRTA  | 11 | 0.02424081 | 0.641969629 |
| -0.1052084 | cg24714100 | HCG18;HCG1  | 6  | 0.00461952 | 0.655771065 |

|            |               |              |    |            |             |
|------------|---------------|--------------|----|------------|-------------|
| -0.1277889 | cg07717512    | HCG22        | 6  | 0.03243493 | 0.690543624 |
| -0.1212162 | cg05615856    | HCG27        | 6  | 0.02623519 | 0.407015436 |
| -0.1202713 | cg09470907    | HCG4P6       | 6  | 0.00922818 | 0.552796843 |
| -0.1370524 | cg07971188    | HCP5         | 6  | 0.01644847 | 0.429520397 |
| -0.1032209 | cg25843003    | HCP5         | 6  | 0.00925678 | 0.702628923 |
| -0.1158932 | cg21026460    | HDAC11;HDA   | 3  | 0.00268889 | 0.892661522 |
| -0.1288089 | cg19955928    | HDAC4        | 2  | 0.00292781 | 0.647436655 |
| -0.118243  | cg26876664    | HDAC4        | 2  | 0.00096211 | 0.782728671 |
| -0.1319073 | cg09681977    | HDAC4        | 2  | 0.00211548 | 0.681606834 |
| -0.1067703 | cg05997414    | HDAC4        | 2  | 0.00282066 | 0.633087074 |
| -0.1131076 | cg00332048    | HDAC9;HDAC   | 7  | 0.00614738 | 0.362195645 |
| -0.1084234 | cg19670290    | HDDC3;UNC4   | 15 | 0.00011415 | 0.28518149  |
| -0.1006486 | cg23280720    | HECA         | 6  | 0.00381556 | 0.800949395 |
| -0.2581753 | cg01213645    | HECW1        | 7  | 0.03606414 | 0.813770276 |
| -0.209466  | cg18752527    | HECW2        | 2  | 0.00219754 | 0.833839744 |
| -0.1578209 | cg09907068    | HECW2        | 2  | 0.02447423 | 0.820598597 |
| -0.1265259 | cg02550950    | HECW2        | 2  | 0.01190543 | 0.730498145 |
| -0.1042502 | cg08338478    | HECW2        | 2  | 0.01194289 | 0.711067609 |
| -0.1206036 | ch.3.2442921F | HEG1         | 3  | 0.01835909 | 0.226708917 |
| -0.2304703 | cg11029367    | HEG1         | 3  | 0.00443063 | 0.768427711 |
| -0.1627597 | cg13486755    | HEMGN;HEM    | 9  | 0.0064434  | 0.447299177 |
| -0.1830014 | cg09317502    | HEPACAM2     | 7  | 0.01212269 | 0.49888823  |
| -0.177391  | cg02544502    | HEPACAM2;H   | 7  | 0.02066691 | 0.460636004 |
| -0.1686757 | cg02814482    | HEPHL1       | 11 | 0.02134278 | 0.480145099 |
| -0.1489737 | cg14091419    | HERC2        | 15 | 0.04448042 | 0.774048411 |
| -0.1334723 | cg24495350    | HEXA         | 15 | 0.00417309 | 0.820870727 |
| -0.1182722 | cg03301084    | HEY1;HEY1    | 8  | 0.00621545 | 0.388730322 |
| -0.1180929 | cg15567428    | HGF;HGF;HG   | 7  | 0.00014355 | 0.514615854 |
| -0.1377299 | cg18187729    | HHLA1        | 8  | 0.00045243 | 0.777635427 |
| -0.1833871 | cg01160692    | HIC1;HIC1    | 17 | 0.03370303 | 0.907672987 |
| -0.140824  | cg08449639    | HIC2         | 22 | 0.0032554  | 0.485786481 |
| -0.1256526 | cg14277677    | HIP1R        | 12 | 0.02956526 | 0.553381645 |
| -0.1217429 | cg20784259    | HIPK1;HIPK1; | 1  | 0.01075642 | 0.75104848  |
| -0.2193447 | cg23646343    | HIPK2;HIPK2  | 7  | 0.00736344 | 0.741235862 |
| -0.1649527 | cg01171339    | HIST1H2AL    | 6  | 0.0184353  | 0.639160122 |
| -0.1202442 | cg24254842    | HIVEP3;HIVE  | 1  | 0.01805463 | 0.708702869 |
| -0.1121245 | cg23114964    | HIVEP3;HIVE  | 1  | 0.01380019 | 0.762632523 |
| -0.1023711 | cg17892259    | HIVEP3;HIVE  | 1  | 0.02552901 | 0.759896732 |
| -0.1330479 | cg10054398    | HIVEP3;HIVE  | 1  | 0.00666693 | 0.785699212 |
| -0.100533  | cg05595692    | HK2          | 2  | 0.02585484 | 0.752590981 |
| -0.1758401 | cg09869729    | HK3          | 5  | 0.00367612 | 0.74163208  |
| -0.1465976 | cg17809377    | HK3          | 5  | 0.00273745 | 0.678721598 |
| -0.1455367 | cg11086883    | HLA-A        | 6  | 0.02978947 | 0.429103713 |
| -0.1165882 | cg08039587    | HLA-A        | 6  | 0.00177811 | 0.637643375 |
| -0.1017237 | cg16742075    | HLA-A        | 6  | 0.04329129 | 0.505663046 |
| -0.10127   | cg24421410    | HLA-DMA      | 6  | 0.01764009 | 0.713600347 |

|            |            |             |    |            |             |
|------------|------------|-------------|----|------------|-------------|
| -0.1278274 | cg24129356 | HLA-DMA     | 6  | 0.03741429 | 0.796699006 |
| -0.1233698 | cg02806715 | HLA-DMA     | 6  | 0.01984974 | 0.803545188 |
| -0.1137267 | cg09146459 | HLA-DMA     | 6  | 0.02418213 | 0.54587947  |
| -0.1500496 | cg03520342 | HLA-DMA     | 6  | 0.02672176 | 0.618876791 |
| -0.2263811 | cg00862588 | HLA-DMB     | 6  | 0.00125244 | 0.315757315 |
| -0.1923133 | cg22324029 | HLA-DMB     | 6  | 0.01455944 | 0.608983177 |
| -0.1334059 | cg05281796 | HLA-DOA     | 6  | 0.00251421 | 0.592606452 |
| -0.1237876 | cg20907136 | HLA-DPA1    | 6  | 0.03274408 | 0.441560941 |
| -0.1905534 | cg15575880 | HLA-DPA1    | 6  | 0.02675797 | 0.596540609 |
| -0.1752544 | cg24287218 | HLA-DPA1    | 6  | 0.01105816 | 0.487460757 |
| -0.1958922 | cg09321817 | HLA-DPA1    | 6  | 0.0011636  | 0.752619094 |
| -0.1927484 | cg00403478 | HLA-DPA1    | 6  | 0.00504095 | 0.712689803 |
| -0.1547202 | cg11451043 | HLA-DPA1    | 6  | 0.00096068 | 0.47872222  |
| -0.1498346 | cg26350754 | HLA-DPB1    | 6  | 0.00482035 | 0.718096734 |
| -0.1448225 | cg14356799 | HLA-DPB1    | 6  | 0.00335726 | 0.757467549 |
| -0.1432075 | cg12365667 | HLA-DPB1    | 6  | 0.01013819 | 0.472294572 |
| -0.1186892 | cg12899649 | HLA-DPB1;HL | 6  | 0.00042464 | 0.240349639 |
| -0.1151418 | cg08506353 | HLA-DPB2    | 6  | 0.01238904 | 0.595385763 |
| -0.1143896 | cg17043247 | HLA-DPB2    | 6  | 0.00780508 | 0.706109618 |
| -0.101743  | cg00334532 | HLA-DQA2    | 6  | 0.0152771  | 0.800968234 |
| -0.1275093 | cg10989981 | HLA-DQB1    | 6  | 0.01791368 | 0.635347292 |
| -0.1893345 | cg06499030 | HLA-DQB2    | 6  | 0.00137787 | 0.354830322 |
| -0.2059362 | cg19248557 | HLA-DRA     | 6  | 0.03519487 | 0.730198334 |
| -0.1621612 | cg25258233 | HLA-DRA     | 6  | 0.01579038 | 0.445481915 |
| -0.1235862 | cg26928531 | HLA-DRA;HL  | 6  | 0.00260003 | 0.397221844 |
| -0.1550459 | cg25046571 | HLA-G       | 6  | 0.03022756 | 0.585484187 |
| -0.1282465 | cg18645081 | HLX         | 1  | 0.00513896 | 0.579417659 |
| -0.1689518 | cg01504447 | HMGB1       | 13 | 0.04418248 | 0.299896661 |
| -0.1331379 | cg13176979 | HMGN3;HMK   | 6  | 0.00560244 | 0.764860034 |
| -0.131652  | cg02211825 | HMGN3;HMK   | 6  | 0.01045891 | 0.863929444 |
| -0.2151574 | cg02423080 | HMGXB3      | 5  | 0.0054314  | 0.416227433 |
| -0.1914369 | cg14478768 | HMHA1       | 19 | 0.02398897 | 0.590311513 |
| -0.1472391 | cg02753354 | HMHA1       | 19 | 0.00473877 | 0.45949562  |
| -0.1466347 | cg10655396 | HMHA1       | 19 | 0.00216283 | 0.414165564 |
| -0.1843294 | cg09560590 | HMHB1       | 5  | 0.00081264 | 0.756657685 |
| -0.1068384 | cg04225775 | HMHB1;HMF   | 5  | 0.00027017 | 0.713453723 |
| -0.1124005 | cg14694075 | HNF1B;HNF1  | 17 | 0.01818517 | 0.553988694 |
| -0.1326164 | cg22872033 | HNRNPC;HNI  | 14 | 0.01823019 | 0.674207219 |
| -0.114216  | cg15722438 | HNRNPM;HN   | 19 | 0.01418477 | 0.781881358 |
| -0.1057723 | cg22829917 | HOTAIR      | 12 | 0.01051314 | 0.530062399 |
| -0.1030915 | cg00079219 | HOTAIR      | 12 | 0.03945713 | 0.729858641 |
| -0.1617545 | cg14691529 | HOTAIR      | 12 | 0.00020698 | 0.730204717 |
| -0.1541697 | cg24895871 | HOTAIR      | 12 | 0.02967151 | 0.714786084 |
| -0.1526408 | cg18824990 | HOTAIR      | 12 | 0.00467451 | 0.764849697 |
| -0.1194141 | cg18040901 | HOTAIR      | 12 | 0.0002596  | 0.600301501 |
| -0.1673989 | cg11328436 | HOTAIR      | 12 | 0.0201127  | 0.764424537 |

|            |            |             |    |            |             |
|------------|------------|-------------|----|------------|-------------|
| -0.1690859 | cg16006349 | HOTAIR      | 12 | 0.00132156 | 0.845502259 |
| -0.1017018 | cg17573720 | HOTAIR      | 12 | 0.00423319 | 0.479045614 |
| -0.1008368 | cg08941355 | HOXA1;HOXA  | 7  | 0.0390846  | 0.818195731 |
| -0.1073801 | cg06587155 | HOXA11AS    | 7  | 0.02340972 | 0.458279562 |
| -0.1504236 | cg12147489 | HOXA11AS    | 7  | 0.01041808 | 0.450341051 |
| -0.1061931 | cg20994254 | HOXA11AS    | 7  | 0.00928586 | 0.771557806 |
| -0.1055045 | cg07083464 | HOXA13      | 7  | 0.03594969 | 0.472730969 |
| -0.1973115 | cg23206851 | HOXA2       | 7  | 0.01521243 | 0.533152291 |
| -0.2128955 | cg06911354 | HOXA7       | 7  | 0.02436693 | 0.821914916 |
| -0.1487475 | cg26511321 | HOXA7       | 7  | 0.00107568 | 0.461996659 |
| -0.1258867 | cg00524443 | HOXB3       | 17 | 0.03246573 | 0.481566076 |
| -0.136123  | cg04014328 | HOXB4       | 17 | 0.04681486 | 0.51442183  |
| -0.1248051 | cg21493516 | HOXC4       | 12 | 0.00497242 | 0.786040344 |
| -0.1116563 | cg11594833 | HOXC4       | 12 | 0.03515426 | 0.888290191 |
| -0.1086806 | cg22151644 | HOXC4       | 12 | 0.0163769  | 0.726220666 |
| -0.1743579 | cg10366797 | HOXC4       | 12 | 0.03230159 | 0.850891946 |
| -0.1550668 | cg01524853 | HOXC4;HOXC  | 12 | 0.00340662 | 0.354478957 |
| -0.1541713 | cg09720701 | HOXC4;HOXC  | 12 | 0.00416456 | 0.433508634 |
| -0.1093734 | cg22747076 | HOXC4;HOXC  | 12 | 0.01947387 | 0.677308682 |
| -0.1496246 | cg05992786 | HOXC4;HOXC  | 12 | 0.03886184 | 0.712275859 |
| -0.1329637 | cg11585893 | HOXC4;HOXC  | 12 | 0.00169174 | 0.580046869 |
| -0.1251054 | cg26201952 | HOXC4;HOXC  | 12 | 0.0017823  | 0.715916455 |
| -0.1666568 | cg05987823 | HOXC4;HOXC  | 12 | 0.01546685 | 0.815300396 |
| -0.1873577 | cg06479254 | HOXD10      | 2  | 0.03831935 | 0.853885896 |
| -0.1853131 | cg21902187 | HOXD3       | 2  | 0.03626612 | 0.847540864 |
| -0.1054559 | cg25942990 | HOXD4;MIR1  | 2  | 0.00814167 | 0.72797707  |
| -0.1010116 | cg10753836 | HOXD9       | 2  | 0.02317923 | 0.49686231  |
| -0.1167237 | cg09173768 | HOXD9       | 2  | 0.01676147 | 0.73120819  |
| -0.1240483 | cg11597131 | HOXD9       | 2  | 0.01551061 | 0.471267351 |
| -0.1700871 | cg19373813 | HOXD9       | 2  | 0.00529793 | 0.384019477 |
| -0.1677676 | cg24715735 | HPN;HPN     | 19 | 0.0028186  | 0.469046407 |
| -0.1531782 | cg06151964 | HPN;HPN;HP  | 19 | 0.00286162 | 0.635930308 |
| -0.1233466 | cg12183501 | HPS3        | 3  | 0.00954668 | 0.835888376 |
| -0.1102897 | cg21431832 | HPS4;HPS4   | 22 | 0.0387066  | 0.736835654 |
| -0.110206  | cg03321813 | HPSE;HPSE;H | 4  | 0.00362218 | 0.587841068 |
| -0.1292035 | cg16745930 | HPSE2;HPSE2 | 10 | 0.0164193  | 0.68275964  |
| -0.1063334 | cg03593259 | HRASLS2     | 11 | 0.0202653  | 0.61997035  |
| -0.1342285 | cg00489394 | HRASLS5;HR/ | 11 | 0.03689565 | 0.479797704 |
| -0.1293516 | cg00754253 | HRASLS5;HR/ | 11 | 0.01095321 | 0.434247013 |
| -0.183146  | cg15819918 | HRK         | 12 | 0.04694337 | 0.631879839 |
| -0.1422201 | cg19442493 | HRNBP3      | 17 | 0.00105217 | 0.543442321 |
| -0.1354797 | cg00380428 | HRNBP3      | 17 | 0.03936967 | 0.719421639 |
| -0.1553673 | cg02150820 | HRNBP3      | 17 | 0.00138968 | 0.755505396 |
| -0.1425745 | cg09837116 | HRNBP3      | 17 | 0.00089136 | 0.54128773  |
| -0.1226664 | cg01944110 | HS3ST1      | 4  | 0.01024612 | 0.856763733 |
| -0.1050411 | cg01242676 | HS3ST3A1    | 17 | 0.04162271 | 0.831260657 |

|            |            |               |    |            |             |
|------------|------------|---------------|----|------------|-------------|
| -0.1330635 | cg25181144 | HS3ST3B1      | 17 | 0.0007449  | 0.229232384 |
| -0.165797  | cg18192491 | HS3ST5        | 6  | 0.0139004  | 0.713813411 |
| -0.1215629 | cg16684691 | HS6ST3        | 13 | 0.00190569 | 0.507579758 |
| -0.1644305 | cg09894383 | HSD17B2       | 16 | 0.00891351 | 0.510476078 |
| -0.1513731 | cg02524754 | HSF2BP        | 21 | 0.0189904  | 0.77302835  |
| -0.1616933 | cg17895870 | HSH2D         | 19 | 0.00017449 | 0.297416332 |
| -0.1073016 | cg15668490 | HSH2D         | 19 | 0.00145088 | 0.409859085 |
| -0.1285777 | cg02025270 | HSH2D         | 19 | 0.01442997 | 0.679234712 |
| -0.1847103 | cg13838634 | HSPA1A        | 6  | 0.00213053 | 0.504879249 |
| -0.1882537 | cg24888257 | HSPA1A;HSP    | 6  | 0.00349843 | 0.586117224 |
| -0.1229782 | cg12851514 | HSPC072;LOC   | 20 | 0.00807904 | 0.332078806 |
| -0.1567293 | cg00023024 | HTR1D         | 1  | 0.01832006 | 0.71699831  |
| -0.1010131 | cg08273233 | HTR1E         | 6  | 0.00054161 | 0.66494753  |
| -0.146586  | cg15888097 | HTR1E         | 6  | 0.00191237 | 0.419480637 |
| -0.1442461 | cg08372315 | HTR3A;HTR3    | 11 | 0.0204767  | 0.623505342 |
| -0.244589  | cg01459748 | HTR3B         | 11 | 0.00066183 | 0.666501175 |
| -0.1151546 | cg01808284 | HTR4;HTR4;t   | 5  | 0.02483815 | 0.587188573 |
| -0.1320553 | cg15719652 | HTRA1         | 10 | 0.01353909 | 0.824893238 |
| -0.1220024 | cg00701951 | HTRA1         | 10 | 0.00706008 | 0.841579654 |
| -0.1141565 | cg11157691 | HTRA1         | 10 | 0.000644   | 0.791289847 |
| -0.1436665 | cg23791011 | HTRA1         | 10 | 0.00516936 | 0.709682819 |
| -0.1023416 | cg21184369 | HTRA4;PLEK1   | 8  | 0.00011804 | 0.760210939 |
| -0.102319  | cg21121843 | HTT           | 4  | 0.03344513 | 0.796976129 |
| -0.1055088 | cg25284031 | HVCN1;HVCN    | 12 | 0.01633283 | 0.672576184 |
| -0.1669679 | cg14430015 | ICA1;ICA1;IC  | 7  | 0.0039499  | 0.585613335 |
| -0.1232962 | cg10275770 | ICAM2;ICAM    | 17 | 0.0049904  | 0.48551125  |
| -0.1481015 | cg12793803 | ICAM2;ICAM    | 17 | 0.00431698 | 0.592190985 |
| -0.1452942 | cg18054725 | ICAM3         | 19 | 0.00077117 | 0.355558294 |
| -0.1432904 | cg23671824 | ICAM3;ICAM    | 19 | 0.02878213 | 0.448352501 |
| -0.1149075 | cg15391590 | ICK;ICK       | 6  | 0.01984974 | 0.881959653 |
| -0.1115042 | cg11336311 | ID3           | 1  | 0.0324538  | 0.487080066 |
| -0.1073608 | cg20284982 | IER3          | 6  | 0.00395258 | 0.505559577 |
| -0.1108781 | cg20597486 | IFI16;IFI16   | 1  | 0.00575759 | 0.795284842 |
| -0.1214419 | cg07463059 | IFI16;IFI16   | 1  | 0.00109553 | 0.6521847   |
| -0.2369537 | cg16341979 | IFI27;IFI27   | 14 | 0.00783985 | 0.721680229 |
| -0.18157   | cg24979161 | IFI27L1;IFI27 | 14 | 0.0180927  | 0.785243044 |
| -0.175643  | cg07107453 | IFI44         | 1  | 0.04694227 | 0.716318961 |
| -0.1421923 | cg17980508 | IFI44L        | 1  | 0.00158566 | 0.454357163 |
| -0.1464557 | cg27478224 | IFIT2         | 10 | 0.00506623 | 0.237062211 |
| -0.1633638 | cg00622702 | IFNAR1        | 21 | 0.02579759 | 0.757544992 |
| -0.1009804 | cg17356733 | IFNGR2        | 21 | 0.00701258 | 0.887492528 |
| -0.1029176 | cg08173915 | IFNGR2        | 21 | 0.02213858 | 0.800180146 |
| -0.1932326 | cg19724567 | IFRD1         | 7  | 0.00812976 | 0.587524789 |
| -0.1028486 | cg05526364 | IFT122;IFT12  | 3  | 0.01634592 | 0.666367925 |
| -0.1317942 | cg03163545 | IFT140;TMEM   | 16 | 0.00995838 | 0.627391474 |
| -0.1207993 | cg08761208 | IGDCC4        | 15 | 0.00090805 | 0.644765485 |

|            |            |                |    |            |             |
|------------|------------|----------------|----|------------|-------------|
| -0.105914  | cg26579713 | IGDCC4         | 15 | 0.00141659 | 0.726770465 |
| -0.2633099 | cg25924694 | IGF1;IGF1;IGI  | 12 | 0.04654046 | 0.344112774 |
| -0.1898443 | cg27139419 | IGF1R          | 15 | 0.02250448 | 0.851221195 |
| -0.1224534 | cg26577252 | IGF1R          | 15 | 0.00362882 | 0.62611382  |
| -0.1172241 | cg23030069 | IGF2AS;INS-IC  | 11 | 0.01009476 | 0.585172947 |
| -0.102217  | cg26719629 | IGF2AS;INS-IC  | 11 | 0.03714254 | 0.838324343 |
| -0.140932  | cg19131227 | IGF2AS;INS-IC  | 11 | 0.03655982 | 0.722390993 |
| -0.128343  | cg20088847 | IGF2AS;INS-IC  | 11 | 0.02013892 | 0.646133194 |
| -0.1575986 | cg14895961 | IGF2AS;INS-IC  | 11 | 0.01092566 | 0.825931719 |
| -0.1258939 | cg05323345 | IGF2AS;INS-IC  | 11 | 0.00746943 | 0.760550206 |
| -0.1256374 | cg02425416 | IGF2AS;INS-IC  | 11 | 0.01039523 | 0.714163428 |
| -0.1117737 | cg05777976 | IGF2AS;INS-IC  | 11 | 3.77E-05   | 0.589674367 |
| -0.1481732 | cg10501065 | IGF2AS;INS-IC  | 11 | 0.01151368 | 0.296166611 |
| -0.2359736 | cg12877935 | IGF2AS;INS-IC  | 11 | 0.00088374 | 0.449946136 |
| -0.1548306 | cg11005826 | IGF2AS;INS-IC  | 11 | 0.00192692 | 0.618036821 |
| -0.1341174 | cg21237591 | IGF2AS;INS-IC  | 11 | 0.00556595 | 0.409902094 |
| -0.1189447 | cg21025494 | IGF2BP3        | 7  | 0.00092056 | 0.690011841 |
| -0.1607948 | cg25754852 | IGF2R          | 6  | 0.02080371 | 0.686221054 |
| -0.130796  | cg17980404 | IGFBP4         | 17 | 0.01132647 | 0.620183883 |
| -0.1051921 | cg06559575 | IGFBP6         | 12 | 0.00078633 | 0.333514393 |
| -0.1475561 | cg15696506 | IGFBP7         | 4  | 0.00856725 | 0.291548425 |
| -0.1059577 | cg10923036 | IGFBP7         | 4  | 0.00045412 | 0.434117972 |
| -0.1184899 | cg02415431 | IGLL1;IGLL1    | 22 | 0.01395469 | 0.641515168 |
| -0.1904007 | cg14902267 | IGLL1;IGLL1    | 22 | 0.0097826  | 0.547302869 |
| -0.1076004 | cg04237608 | IGSF21         | 1  | 0.0071272  | 0.518249393 |
| -0.2339421 | cg13840174 | IGSF21         | 1  | 0.00227306 | 0.663518017 |
| -0.175801  | cg16120742 | IKZF1          | 7  | 0.04935308 | 0.356509311 |
| -0.1108457 | cg05468843 | IL10RA;IL10R   | 11 | 0.00400749 | 0.501093616 |
| -0.1110733 | cg12123019 | IL12RB1;IL12   | 19 | 0.00404496 | 0.644227407 |
| -0.1305195 | cg09577367 | IL12RB1;IL12   | 19 | 0.02247866 | 0.526046369 |
| -0.107485  | cg01574571 | IL12RB1;IL12   | 19 | 0.00804034 | 0.622392352 |
| -0.1044446 | cg19745415 | IL12RB2        | 1  | 0.04196897 | 0.373977729 |
| -0.1961487 | cg01356829 | IL12RB2        | 1  | 0.00079084 | 0.562503696 |
| -0.1771836 | cg11418177 | IL15;IL15      | 4  | 0.01431969 | 0.54402059  |
| -0.1221977 | cg07794885 | IL17C          | 16 | 0.01353127 | 0.449531349 |
| -0.1213871 | cg07832674 | IL17RE;IL17R   | 3  | 0.03232589 | 0.772448122 |
| -0.1544818 | cg09218250 | IL17RE;IL17R   | 3  | 0.0035329  | 0.518121504 |
| -0.1576008 | cg16324121 | IL17RE;IL17R   | 3  | 0.03731998 | 0.691631493 |
| -0.1081228 | cg00090674 | IL17REL        | 22 | 0.00158707 | 0.785080729 |
| -0.1448793 | cg05736785 | IL17REL        | 22 | 0.03316444 | 0.59527655  |
| -0.1219981 | cg01522296 | IL17REL        | 22 | 0.0037923  | 0.793355961 |
| -0.1663131 | cg12380764 | IL19           | 1  | 0.0241326  | 0.582798612 |
| -0.167245  | cg27368523 | IL1A           | 2  | 0.04678037 | 0.746309979 |
| -0.1168715 | cg02229946 | IL1F7;IL1F7;II | 2  | 0.0054314  | 0.673656807 |
| -0.1104861 | cg03989987 | IL1RN;IL1RN;   | 2  | 0.03427423 | 0.38054486  |
| -0.1573166 | cg25065535 | IL2            | 4  | 0.02528535 | 0.495201871 |

|            |            |               |    |            |             |
|------------|------------|---------------|----|------------|-------------|
| -0.1425505 | cg02656594 | IL21R         | 16 | 0.01070995 | 0.580179272 |
| -0.1267183 | cg05814654 | IL21R;IL21R   | 16 | 0.01595839 | 0.46794967  |
| -0.1124735 | cg23507945 | IL22RA2;IL22  | 6  | 0.04152522 | 0.825633075 |
| -0.1085189 | cg21477985 | IL23A         | 12 | 0.0080813  | 0.328572959 |
| -0.1405427 | cg20944379 | IL24;IL24     | 1  | 0.03366556 | 0.416999849 |
| -0.111819  | cg27131821 | IL2RA         | 10 | 0.00438116 | 0.31292288  |
| -0.2708861 | cg22788465 | IL3           | 5  | 0.00095485 | 0.519668014 |
| -0.186359  | cg04245540 | IL31RA        | 5  | 0.01884548 | 0.241709354 |
| -0.1545723 | cg07363330 | IL31RA        | 5  | 0.03122271 | 0.58040344  |
| -0.1480505 | cg16649560 | IL4R;IL4R     | 16 | 0.00046123 | 0.448182889 |
| -0.1099696 | cg23032421 | IL5RA;IL5RA;I | 3  | 0.00180528 | 0.710384433 |
| -0.1480142 | cg04312209 | IL7R          | 5  | 0.04249453 | 0.414158329 |
| -0.1081993 | cg24833674 | ILD2          | 1  | 0.00187795 | 0.85826097  |
| -0.1223422 | cg08065733 | INHBB         | 2  | 0.00570178 | 0.422802185 |
| -0.122195  | cg03438101 | INPP5A        | 10 | 0.02758866 | 0.639782694 |
| -0.1507897 | cg06760238 | INPP5A        | 10 | 0.01646887 | 0.652542983 |
| -0.2718837 | cg05695429 | INPP5D;INPP   | 2  | 0.00147565 | 0.662315603 |
| -0.2040507 | cg07185664 | INPP5K;INPP   | 17 | 0.02523279 | 0.742084446 |
| -0.1800163 | cg04057455 | INS-IGF2;IGF  | 11 | 0.00928978 | 0.725409578 |
| -0.164805  | cg02742555 | INSC;INSC     | 11 | 0.00010095 | 0.534788214 |
| -0.158008  | cg08129092 | INTS3         | 1  | 0.00067309 | 0.402555833 |
| -0.1563383 | cg10452060 | IPCEF1;IPCEF  | 6  | 0.00700217 | 0.866604433 |
| -0.1477221 | cg16932472 | IPO5;IPO5     | 13 | 0.01388161 | 0.541718159 |
| -0.147198  | cg22677858 | IPO9          | 1  | 0.00080277 | 0.356811508 |
| -0.1468456 | cg16478536 | IRF4          | 6  | 0.00045507 | 0.356582496 |
| -0.1447201 | cg00140447 | IRF5;IRF5;IRF | 7  | 0.00821471 | 0.675271331 |
| -0.1442381 | cg13914531 | IRF5;IRF5;IRF | 7  | 0.02103196 | 0.750449966 |
| -0.1433409 | cg04086097 | IRF5;IRF5;IRF | 7  | 0.00345076 | 0.801005506 |
| -0.1429292 | cg00645579 | IRF7;IRF7;ML  | 11 | 0.01166014 | 0.805494018 |
| -0.1372015 | cg16705546 | IRF8          | 16 | 0.00895258 | 0.727723828 |
| -0.1293949 | cg04599946 | IRF8          | 16 | 0.00588996 | 0.343191044 |
| -0.1241046 | cg09100014 | IRF8          | 16 | 0.00877215 | 0.812766618 |
| -0.1164895 | cg07955474 | IRF8          | 16 | 0.00189164 | 0.681663611 |
| -0.1118242 | cg01901262 | IRX5          | 16 | 0.00027298 | 0.312280524 |
| -0.1082646 | cg10824810 | IRX5          | 16 | 0.00152272 | 0.707495525 |
| -0.1060609 | cg05099576 | IRX6          | 16 | 0.00622483 | 0.750789843 |
| -0.1956758 | cg02198701 | IRX6          | 16 | 0.00253418 | 0.560995196 |
| -0.1235301 | cg17686487 | ISL1          | 5  | 0.00059972 | 0.349731895 |
| -0.1223441 | cg26293019 | ISL1          | 5  | 0.00192692 | 0.518450803 |
| -0.1105142 | cg05412396 | ISL2          | 15 | 0.03732451 | 0.763329196 |
| -0.1966092 | cg26266708 | ISL2          | 15 | 0.04773715 | 0.636778196 |
| -0.1420739 | cg25789916 | ISLR2;ISLR2;I | 15 | 0.00278527 | 0.480687585 |
| -0.1362651 | cg08682532 | ISLR2;ISLR2;I | 15 | 0.01077128 | 0.586319253 |
| -0.1303874 | cg25666233 | ISLR2;ISLR2;I | 15 | 0.01402609 | 0.691289622 |
| -0.1058269 | cg24488317 | ISM1          | 20 | 0.00420542 | 0.62022027  |
| -0.1053854 | cg05849772 | ITFG3         | 16 | 0.00583145 | 0.734976343 |



|            |            |                |    |            |             |
|------------|------------|----------------|----|------------|-------------|
| -0.1047744 | cg23721083 | ITGA11         | 15 | 0.02427    | 0.709363734 |
| -0.1680345 | cg09828265 | ITGA9          | 3  | 0.00678473 | 0.43643443  |
| -0.1263769 | cg02225720 | ITGAE          | 17 | 0.00051131 | 0.490973821 |
| -0.1401451 | cg14176836 | ITGAL;ITGAL    | 16 | 0.01676982 | 0.402561266 |
| -0.2113597 | cg26233914 | ITGAX;ITGAX    | 16 | 0.00116182 | 0.27222286  |
| -0.1505495 | cg14112356 | ITGB2          | 21 | 0.01673905 | 0.401184046 |
| -0.1060189 | cg22699620 | ITGB2;ITGB2    | 21 | 0.00878219 | 0.299401964 |
| -0.1430601 | cg10753610 | ITGB3          | 17 | 0.00056387 | 0.505401367 |
| -0.1256393 | cg00871980 | ITGB5          | 3  | 0.00800321 | 0.481263386 |
| -0.1464512 | cg00171092 | ITGB5          | 3  | 0.00637314 | 0.618383826 |
| -0.1271192 | cg26689077 | ITGB7          | 12 | 0.02195417 | 0.340903881 |
| -0.2015677 | cg11838152 | ITGBL1         | 13 | 0.00400545 | 0.812657682 |
| -0.1461589 | cg18404041 | ITIH1;ITIH1;IT | 3  | 0.00045865 | 0.299768686 |
| -0.1037081 | cg24628310 | ITIH1;ITIH1;IT | 3  | 0.01082569 | 0.558858775 |
| -0.1030847 | cg16898425 | ITIH1;ITIH1;IT | 3  | 0.00465827 | 0.70705651  |
| -0.1515324 | cg05480883 | ITIH5;ITIH5;IT | 10 | 0.00229179 | 0.228687217 |
| -0.1295678 | cg01546430 | ITK            | 5  | 0.02002819 | 0.766945862 |
| -0.1116013 | cg08972954 | ITK            | 5  | 0.01916689 | 0.576575253 |
| -0.2060306 | cg07177437 | ITLN1          | 1  | 0.00377185 | 0.718174026 |
| -0.1838439 | cg10094191 | ITLN1          | 1  | 0.00117768 | 0.69036159  |
| -0.1584304 | cg20018344 | ITPA;ITPA      | 20 | 0.00486169 | 0.649277013 |
| -0.1166843 | cg14181956 | ITPK1;ITPK1;IT | 14 | 0.02277408 | 0.769886935 |
| -0.1163721 | cg22999830 | ITPK1;ITPK1;IT | 14 | 0.02755771 | 0.848182564 |
| -0.1349424 | cg20272979 | ITPKA          | 15 | 0.00668862 | 0.507165972 |
| -0.1187473 | cg02799411 | ITPR1;ITPR1;IT | 3  | 0.02347421 | 0.77912467  |
| -0.2156309 | cg05795849 | ITPR1;ITPR1;IT | 3  | 0.00251137 | 0.365687385 |
| -0.1205091 | cg11600734 | ITPR1;ITPR1;IT | 3  | 0.00669027 | 0.759570348 |
| -0.1193942 | cg19640166 | ITPRIP         | 10 | 0.00117917 | 0.817849034 |
| -0.1721166 | cg25552843 | ITPRIP         | 10 | 0.00089798 | 0.752874028 |
| -0.1707259 | cg16636756 | ITPRIP         | 10 | 0.00647679 | 0.752983084 |
| -0.1586716 | cg24199006 | ITPRIP         | 10 | 0.00492179 | 0.524346949 |
| -0.1424145 | cg22888181 | ITPRIP         | 10 | 0.00106344 | 0.663263319 |
| -0.1163288 | cg25082710 | IVL            | 1  | 0.04492746 | 0.597075364 |
| -0.1042504 | cg19893664 | JAG2;JAG2      | 14 | 0.0038521  | 0.439876406 |
| -0.1180908 | cg02159913 | JAG2;JAG2      | 14 | 0.00030589 | 0.301423124 |
| -0.1083823 | cg05335315 | JAG2;JAG2      | 14 | 0.00021379 | 0.415036148 |
| -0.2190425 | cg13250024 | JAKMIP3        | 10 | 0.03642109 | 0.8692754   |
| -0.1487466 | cg12230983 | JARID2         | 6  | 0.01764611 | 0.842528378 |
| -0.16109   | cg13623749 | JARID2         | 6  | 0.02094555 | 0.684149395 |
| -0.1177837 | cg26797722 | JARID2         | 6  | 0.00128696 | 0.748665516 |
| -0.2675386 | cg01675238 | JMJD7-PLA2C    | 15 | 0.00343486 | 0.351592127 |
| -0.2178194 | cg22912331 | JPH4;JPH4      | 14 | 0.00557266 | 0.34652301  |
| -0.1901893 | cg10464130 | KALRN;KALRI    | 3  | 0.0319814  | 0.503533503 |
| -0.1522816 | cg12024811 | KALRN;KALRI    | 3  | 0.02655447 | 0.734889112 |
| -0.1395414 | cg25250013 | KANK2;KANK     | 19 | 0.00441943 | 0.443713772 |
| -0.1291764 | cg20916427 | KATNAL2        | 18 | 0.02276887 | 0.741838685 |

|            |            |               |    |            |             |
|------------|------------|---------------|----|------------|-------------|
| -0.1060239 | cg09147140 | KBTBD11       | 8  | 0.00958189 | 0.871846345 |
| -0.1244644 | cg19606153 | KBTBD5        | 3  | 0.00501388 | 0.442673033 |
| -0.1183263 | cg13925011 | KCNA3         | 1  | 0.01345633 | 0.668139202 |
| -0.1089819 | cg03553947 | KCNA4         | 11 | 0.012994   | 0.717103596 |
| -0.1030049 | cg04063166 | KCNA4         | 11 | 0.0009825  | 0.595045322 |
| -0.1277147 | cg26961166 | KCNB2         | 8  | 0.02655306 | 0.350760257 |
| -0.1087034 | cg00114478 | KCNB2         | 8  | 0.02521778 | 0.318647319 |
| -0.1062738 | cg13474918 | KCND2;KCNC    | 7  | 0.00427135 | 0.649905018 |
| -0.1155339 | cg11685391 | KCNIP2;KCNIP4 | 10 | 0.02097402 | 0.664045826 |
| -0.1045421 | cg06773116 | KCNIP4;KCNIP2 | 4  | 0.04011232 | 0.716888676 |
| -0.1564289 | cg25508319 | KCNJ5         | 11 | 0.02386312 | 0.741533989 |
| -0.1210537 | cg16739441 | KCNJ8         | 12 | 0.00333804 | 0.337968751 |
| -0.1835452 | cg02611419 | KCNK16;KCNK17 | 6  | 0.02502568 | 0.796887366 |
| -0.1403415 | cg06347083 | KCNK17;KCNK16 | 6  | 0.00695924 | 0.790038261 |
| -0.1834245 | cg13075951 | KCNK17;KCNK16 | 6  | 0.04923001 | 0.826461003 |
| -0.1489546 | cg07699454 | KCNK17;KCNK16 | 6  | 0.00848655 | 0.787568189 |
| -0.1279254 | cg01627597 | KCNK3         | 2  | 0.00145776 | 0.46095095  |
| -0.2147953 | cg18534312 | KCNK9         | 8  | 0.00572101 | 0.741165327 |
| -0.1662755 | cg25164237 | KCNK9         | 8  | 0.00383893 | 0.660997984 |
| -0.1859515 | cg23107301 | KCNMA1;KCNMA2 | 10 | 0.03661741 | 0.683022902 |
| -0.1802517 | cg26615853 | KCNMA1;KCNMA2 | 10 | 0.00516389 | 0.889613772 |
| -0.1717306 | cg22646937 | KCNMB1;KCNMB2 | 5  | 0.00123428 | 0.492594312 |
| -0.1428605 | cg05343739 | KCNN3;KCNN4   | 1  | 0.00524465 | 0.331823302 |
| -0.1883998 | cg25201998 | KCNN3;KCNN4   | 1  | 0.02169124 | 0.821939159 |
| -0.1488036 | cg08895013 | KCNQ1         | 11 | 0.01433785 | 0.676683786 |
| -0.1483445 | cg18729298 | KCNQ1;KCNC    | 11 | 0.00357665 | 0.487621179 |
| -0.1467334 | cg02097203 | KCNQ1;KCNC    | 11 | 0.00502965 | 0.360575233 |
| -0.1650364 | cg05623526 | KCNQ1;KCNC    | 11 | 0.00380489 | 0.474902058 |
| -0.1227816 | cg02258534 | KCNQ1;KCNC    | 11 | 0.02397062 | 0.80073238  |
| -0.1233105 | cg07824422 | KCNQ1;KCNC    | 11 | 0.00016629 | 0.571554595 |
| -0.1053208 | cg27119222 | KCNQ1;KCNC    | 11 | 0.00989552 | 0.564461283 |
| -0.1475175 | cg05656180 | KCNQ1DN       | 11 | 0.00342573 | 0.34223952  |
| -0.1136119 | cg22675922 | KCNQ1DN       | 11 | 0.00975701 | 0.703311508 |
| -0.2085574 | cg07439128 | KCNQ1DN       | 11 | 0.00434916 | 0.674704979 |
| -0.1133916 | cg01923099 | KCNQ1DN       | 11 | 0.0021827  | 0.547672851 |
| -0.1725978 | cg16083838 | KCNQ1DN       | 11 | 0.00632225 | 0.756935477 |
| -0.1417729 | cg15746253 | KCNQ3         | 8  | 0.00266459 | 0.790240308 |
| -0.1087873 | cg03816707 | KCNS1         | 20 | 0.0001501  | 0.673141707 |
| -0.1013009 | cg16856453 | KCNS1         | 20 | 0.0017171  | 0.427879436 |
| -0.1540194 | cg13730736 | KCNT1         | 9  | 0.00089898 | 0.469037769 |
| -0.1531406 | cg24193140 | KCTD16        | 5  | 0.02414346 | 0.685745444 |
| -0.1295158 | cg10215414 | KCTD19;LRRK1  | 16 | 0.00150509 | 0.362236    |
| -0.1529246 | cg09185884 | KCTD2         | 17 | 0.02563497 | 0.307480998 |
| -0.185763  | cg08055663 | KCTD5         | 16 | 0.00686775 | 0.819201882 |
| -0.2598189 | cg00268476 | KCTD5         | 16 | 0.04981821 | 0.674937608 |
| -0.206419  | cg02544836 | KCTD5         | 16 | 0.01100831 | 0.490904856 |

|            |            |              |    |            |             |
|------------|------------|--------------|----|------------|-------------|
| -0.1734942 | cg09175485 | KDM2A;KDM    | 11 | 0.01035796 | 0.493743845 |
| -0.1729149 | cg10958452 | KDM4A        | 1  | 0.04711452 | 0.759678089 |
| -0.1635838 | cg15621731 | KDM4B        | 19 | 0.02482943 | 0.831206551 |
| -0.1622655 | cg17416338 | KDM4B        | 19 | 0.00866741 | 0.678403999 |
| -0.1474072 | cg14498745 | KEL          | 7  | 0.02946953 | 0.707751247 |
| -0.143227  | cg21031917 | KHDRBS2      | 6  | 0.01022111 | 0.464500584 |
| -0.1195753 | cg24471894 | KIAA0020     | 9  | 0.00105011 | 0.389961972 |
| -0.1901166 | cg03358636 | KIAA0226     | 3  | 0.0249575  | 0.794414181 |
| -0.126288  | cg16051718 | KIAA0232;KI/ | 4  | 0.03692052 | 0.724016638 |
| -0.1879439 | cg02315926 | KIAA0247     | 14 | 0.01786172 | 0.69259637  |
| -0.1540574 | cg16744996 | KIAA0247     | 14 | 0.01974579 | 0.758426455 |
| -0.1019234 | cg01557792 | KIAA0247     | 14 | 0.01380774 | 0.675685911 |
| -0.2579916 | cg16903782 | KIAA0748     | 12 | 0.00367153 | 0.628064901 |
| -0.2219788 | cg16328023 | KIAA0895;KI/ | 7  | 0.00076717 | 0.391842506 |
| -0.1877133 | cg02927252 | KIAA1026;KI/ | 1  | 0.00071044 | 0.817217554 |
| -0.1307458 | cg24630957 | KIAA1033     | 12 | 0.04747897 | 0.633437366 |
| -0.1218162 | cg16689761 | KIAA1147     | 7  | 0.03775287 | 0.782544861 |
| -0.1643725 | cg03844372 | KIAA1217     | 10 | 0.03226006 | 0.843573294 |
| -0.1234993 | cg08883078 | KIAA1310;KI/ | 2  | 0.04911399 | 0.560522088 |
| -0.2254483 | cg21282282 | KIAA1324     | 1  | 0.00191739 | 0.533774336 |
| -0.1883395 | cg18587499 | KIAA1409     | 14 | 0.00472476 | 0.632361751 |
| -0.1485725 | cg01769553 | KIAA1409     | 14 | 0.00804144 | 0.380361683 |
| -0.1474897 | cg01827195 | KIAA1486     | 2  | 0.01572505 | 0.360442403 |
| -0.1448844 | cg16903068 | KIAA1549;KI/ | 7  | 0.04288426 | 0.816655408 |
| -0.1413868 | cg22417613 | KIAA1549;KI/ | 7  | 0.02839569 | 0.806581515 |
| -0.1223772 | cg03968911 | KIAA1598;KI/ | 10 | 0.00380514 | 0.340470458 |
| -0.1214388 | cg02687592 | KIAA1644     | 22 | 0.03298004 | 0.797293444 |
| -0.1179407 | cg11165619 | KIAA1644     | 22 | 0.04424279 | 0.71775789  |
| -0.116762  | cg06584224 | KIAA1671     | 22 | 0.03788517 | 0.539972802 |
| -0.1150193 | cg10759286 | KIAA1751     | 1  | 0.01004994 | 0.461127348 |
| -0.1128902 | cg12247101 | KIAA1949;KI/ | 6  | 0.01547955 | 0.704597541 |
| -0.1322238 | cg25659902 | KIAA1949;KI/ | 6  | 0.03208633 | 0.251123662 |
| -0.1121629 | cg25980484 | KIAA1949;KI/ | 6  | 0.00661907 | 0.333794082 |
| -0.1173633 | cg01413582 | KIAA1949;KI/ | 6  | 0.00425867 | 0.27244851  |
| -0.1159526 | cg24967096 | KIAA1949;KI/ | 6  | 0.00268307 | 0.274046516 |
| -0.1355329 | cg03052182 | KIAA1949;KI/ | 6  | 0.0039877  | 0.348371279 |
| -0.1477119 | cg08420066 | KIAA1949;KI/ | 6  | 0.00394188 | 0.383858621 |
| -0.1389789 | cg08887400 | KIAA1949;KI/ | 6  | 0.02065098 | 0.355767761 |
| -0.1193675 | cg15768443 | KIAA1949;KI/ | 6  | 0.01516078 | 0.504199148 |
| -0.1183226 | cg00278359 | KIAA1949;KI/ | 6  | 0.01623729 | 0.354799456 |
| -0.1379554 | cg03953626 | KIAA1949;KI/ | 6  | 0.04335972 | 0.446561046 |
| -0.1040098 | cg11554650 | KIAA1949;KI/ | 6  | 0.01885831 | 0.663549581 |
| -0.1206173 | cg20690667 | KIAA1949;KI/ | 6  | 0.00688952 | 0.396082712 |
| -0.1042363 | cg18586886 | KIAA1949;KI/ | 6  | 0.01774806 | 0.481611968 |
| -0.1861334 | cg18427856 | KIAA1949;KI/ | 6  | 0.01064088 | 0.468014975 |
| -0.1588812 | cg12105190 | KIAA1949;KI/ | 6  | 0.00187174 | 0.573136604 |

|            |            |              |    |            |             |
|------------|------------|--------------|----|------------|-------------|
| -0.1234749 | cg00010853 | KIAA1949;KI/ | 6  | 0.00078633 | 0.627977159 |
| -0.1115759 | cg12036303 | KIAA1949;KI/ | 6  | 0.00254751 | 0.60871668  |
| -0.1347753 | cg07603449 | KIAA2013     | 1  | 0.0435701  | 0.624635947 |
| -0.1708216 | cg12431299 | KIF1A        | 2  | 0.00032948 | 0.326707535 |
| -0.1579956 | cg11802797 | KIF1B        | 1  | 0.00070545 | 0.587247626 |
| -0.1068629 | cg26848071 | KIF1C        | 17 | 0.00921083 | 0.757462593 |
| -0.2273819 | cg26838949 | KIF21B       | 1  | 0.03367695 | 0.823785798 |
| -0.1206274 | cg21477075 | KIF25;KIF25  | 6  | 0.00419684 | 0.864196391 |
| -0.2111355 | cg15358723 | KIF26B       | 1  | 0.00565723 | 0.810266181 |
| -0.110376  | cg18234115 | KIF26B       | 1  | 0.01954201 | 0.756039202 |
| -0.1359507 | cg17226602 | KIF4B        | 5  | 0.0007702  | 0.400827903 |
| -0.1461608 | cg21303039 | KIF5C        | 2  | 0.02038767 | 0.632003956 |
| -0.1481408 | cg09985560 | KIFC1        | 6  | 0.03115363 | 0.704063146 |
| -0.2155422 | cg26819611 | KIFC3;KIFC3  | 16 | 0.0013731  | 0.444617118 |
| -0.1337279 | cg16861598 | KIR2DL3;KIR2 | 19 | 0.00068458 | 0.518310761 |
| -0.1934573 | cg07233127 | KIR3DL1      | 19 | 0.03548802 | 0.419516329 |
| -0.1883091 | cg26908505 | KIRREL3;KIRF | 11 | 0.02902963 | 0.764710417 |
| -0.1845415 | cg22066894 | KIRREL3;KIRF | 11 | 0.04144362 | 0.759101912 |
| -0.1232276 | cg08530008 | KISS1        | 1  | 0.00798031 | 0.913490709 |
| -0.2410331 | cg01819568 | KIT;KIT      | 4  | 0.01163152 | 0.747643887 |
| -0.2014644 | cg01308409 | KL           | 13 | 0.00126315 | 0.739422095 |
| -0.184602  | cg12162530 | KL           | 13 | 0.00055248 | 0.695439798 |
| -0.1836288 | cg15322516 | KLC1;KLC1;KI | 14 | 0.03102714 | 0.51677874  |
| -0.1623107 | cg06724409 | KLF6;KLF6;KL | 10 | 0.01467548 | 0.773070893 |
| -0.1748092 | cg21777553 | KLF7         | 2  | 0.00114316 | 0.354303902 |
| -0.1004805 | cg07116163 | KLHL23       | 2  | 0.03875753 | 0.704216659 |
| -0.2577205 | cg22342100 | KLHL38       | 8  | 0.02928418 | 0.307945756 |
| -0.186189  | cg20425130 | KLHL6        | 3  | 0.03959365 | 0.844110839 |
| -0.1845723 | cg02844611 | KLHL6        | 3  | 0.0158229  | 0.740232575 |
| -0.1787273 | cg02939781 | KLHL6        | 3  | 0.0019913  | 0.858642228 |
| -0.1513749 | cg09606470 | KLHL6        | 3  | 0.00303968 | 0.586799594 |
| -0.120668  | cg20659064 | KLK10        | 19 | 0.00295237 | 0.369141948 |
| -0.1003656 | cg08375658 | KLK12;KLK12  | 19 | 0.00355065 | 0.328559322 |
| -0.1170881 | cg07798605 | KLK9         | 19 | 0.0398662  | 0.559547587 |
| -0.1086797 | cg01408476 | KLKBL4       | 16 | 0.04291077 | 0.552645609 |
| -0.1055774 | cg14913610 | KLRG1        | 12 | 0.03825075 | 0.856970622 |
| -0.1213349 | cg15368872 | KLRK1        | 12 | 0.01006879 | 0.497899254 |
| -0.1046804 | cg07787634 | KMO          | 1  | 0.03013343 | 0.873946285 |
| -0.1918815 | cg27277403 | KMO          | 1  | 0.0002944  | 0.293273573 |
| -0.1734872 | cg04880751 | KMO          | 1  | 0.00276046 | 0.65988883  |
| -0.1522722 | cg11150901 | KMO          | 1  | 0.00028678 | 0.518789736 |
| -0.1468436 | cg20378687 | KPNA4        | 3  | 0.0154666  | 0.622018208 |
| -0.1409284 | cg09687864 | KPRP         | 1  | 0.02044328 | 0.865180163 |
| -0.1343649 | cg26967305 | KREMEN1      | 22 | 0.00648924 | 0.678412858 |
| -0.1065533 | cg03348792 | KRT1         | 12 | 0.01938891 | 0.731997397 |
| -0.1735234 | cg13594463 | KRT1         | 12 | 0.03441933 | 0.574198183 |

|            |            |               |    |            |             |
|------------|------------|---------------|----|------------|-------------|
| -0.1871845 | cg04588380 | KRT2          | 12 | 0.04450132 | 0.573502009 |
| -0.1283863 | cg11051139 | KRT80;KRT8C   | 12 | 0.0107281  | 0.769620934 |
| -0.1047882 | cg07925587 | KRT80;KRT8C   | 12 | 0.0037861  | 0.608103835 |
| -0.140898  | cg14588606 | KRTAP1-5      | 17 | 0.01392424 | 0.808683974 |
| -0.1552804 | cg23878404 | KRTAP1-5      | 17 | 0.00900206 | 0.58177986  |
| -0.259758  | cg17903229 | KRTAP10-1;C   | 21 | 0.00206053 | 0.586596927 |
| -0.1506945 | cg02493771 | KRTAP13-2     | 21 | 0.00500345 | 0.426982835 |
| -0.1311893 | cg00275828 | KRTAP2-4      | 17 | 0.01103105 | 0.772171476 |
| -0.1280186 | cg09129976 | KRTAP3-1;KR   | 17 | 0.00560906 | 0.857003792 |
| -0.1017531 | cg23058745 | KRTAP4-5;KR   | 17 | 0.00084169 | 0.789273101 |
| -0.1351076 | cg02845204 | KRTAP5-9      | 11 | 0.01437773 | 0.441439608 |
| -0.155284  | cg25717032 | KRTDAP        | 19 | 0.00582777 | 0.404864209 |
| -0.1599861 | cg14313576 | KY            | 3  | 0.00410048 | 0.795966408 |
| -0.153301  | cg11146821 | L1TD1;L1TD1   | 1  | 0.00827226 | 0.652824256 |
| -0.1344222 | cg23718736 | L3MBTL4       | 18 | 0.01595419 | 0.599344286 |
| -0.1310089 | cg22545168 | LAIR1;LAIR1   | 19 | 0.02839244 | 0.524293462 |
| -0.1258589 | cg10132694 | LAIR1;LAIR1   | 19 | 0.03793988 | 0.709508278 |
| -0.1244957 | cg21878746 | LAIR1;LAIR1   | 19 | 0.00965942 | 0.58341829  |
| -0.1084622 | cg24147838 | LAIR1;LAIR1;L | 19 | 0.00771393 | 0.743620178 |
| -0.2173305 | cg06238491 | LAIR1;LAIR1;L | 19 | 0.04568638 | 0.629874847 |
| -0.2211475 | cg05836043 | LAMA1         | 18 | 0.03461103 | 0.884400249 |
| -0.1077908 | cg19738980 | LAMA1         | 18 | 0.03899856 | 0.894622588 |
| -0.123186  | cg15600176 | LAMB1         | 7  | 0.01617665 | 0.825849723 |
| -0.1516667 | cg03041510 | LAMB1         | 7  | 0.00051123 | 0.664611648 |
| -0.1403048 | cg07168232 | LAMB3;LAMI    | 1  | 0.00319343 | 0.453795508 |
| -0.151715  | cg12689670 | LAMC1         | 1  | 0.0037901  | 0.78654222  |
| -0.1119298 | cg13766560 | LAMC3         | 9  | 0.01611439 | 0.748197324 |
| -0.1736817 | cg18030943 | LAMP3         | 3  | 0.00439033 | 0.598415611 |
| -0.153799  | cg17418085 | LAPTM5        | 1  | 0.01983599 | 0.711611453 |
| -0.114264  | cg25948445 | LARP1;LARP1   | 5  | 0.03924715 | 0.360889676 |
| -0.1132844 | cg04760493 | LARP1B;LARF   | 4  | 0.01787629 | 0.501913248 |
| -0.1054058 | cg21895387 | LASS3         | 15 | 0.03817872 | 0.479930139 |
| -0.1125453 | cg00607627 | LAT;LAT;LAT;  | 16 | 0.04554006 | 0.747409841 |
| -0.1308708 | cg03134947 | LAT;LAT;LAT;  | 16 | 0.04592742 | 0.505723113 |
| -0.1045773 | cg23797100 | LAT;LAT;LAT;  | 16 | 0.00798031 | 0.756434035 |
| -0.1398997 | cg22493372 | LAT2;LAT2;L/  | 7  | 0.00363938 | 0.537387833 |
| -0.1119822 | cg03801871 | LBH           | 2  | 0.02324384 | 0.436765625 |
| -0.2509947 | cg18793512 | LBH           | 2  | 0.00374646 | 0.821692301 |
| -0.1969126 | cg13844662 | LCE2C         | 1  | 3.89E-05   | 0.276125797 |
| -0.1374464 | cg10991454 | LCLAT1;LCLA   | 2  | 0.00577668 | 0.751274916 |
| -0.1019503 | cg23469878 | LCN6          | 9  | 0.00704032 | 0.736831755 |
| -0.1655258 | cg17771150 | LCP1          | 13 | 0.03799082 | 0.844868293 |
| -0.1285445 | cg25827710 | LCP1          | 13 | 4.90E-05   | 0.288426423 |
| -0.1056846 | cg23205648 | LCP1          | 13 | 0.002072   | 0.564017054 |
| -0.1022994 | cg08670465 | LCP2          | 5  | 0.00183919 | 0.5439696   |
| -0.1167039 | cg11528914 | LCP2;LCP2     | 5  | 0.01946055 | 0.802308537 |

|            |            |              |    |            |             |
|------------|------------|--------------|----|------------|-------------|
| -0.1119645 | cg09672233 | LCP2;LCP2    | 5  | 0.00864767 | 0.66697008  |
| -0.1027182 | cg27450010 | LDB2;LDB2    | 4  | 0.02401304 | 0.805961963 |
| -0.1067241 | cg24813857 | LDB2;LDB2    | 4  | 0.00096138 | 0.813889803 |
| -0.1483685 | cg08262002 | LDB2;LDB2    | 4  | 0.00415102 | 0.559294498 |
| -0.1523741 | cg26740318 | LDHAL6A;LDI  | 11 | 0.04130253 | 0.430909418 |
| -0.1179527 | cg14259717 | LDHC;LDHC    | 11 | 0.01498874 | 0.35705085  |
| -0.1107381 | cg11821245 | LDHC;LDHC    | 11 | 0.00508695 | 0.4997396   |
| -0.1353538 | cg06180729 | LDLRAD3      | 11 | 0.00133909 | 0.86097201  |
| -0.1164865 | cg18140889 | LELP1        | 1  | 0.0004367  | 0.509900937 |
| -0.1717859 | cg01416657 | LEMD1        | 1  | 0.01706443 | 0.48088548  |
| -0.1172143 | cg15466952 | LEPR;LEPR;LE | 1  | 0.00903066 | 0.543550327 |
| -0.1062417 | cg16004377 | LGALS12;LGA  | 11 | 0.00878496 | 0.797304298 |
| -0.2158282 | cg13439241 | LGALS12;LGA  | 11 | 0.00110771 | 0.342070693 |
| -0.1059918 | cg12792363 | LGALS12;LGA  | 11 | 0.00914862 | 0.807358066 |
| -0.1173433 | cg27376024 | LGALS12;LGA  | 11 | 0.00036897 | 0.249943286 |
| -0.1041518 | cg11183156 | LGALS12;LGA  | 11 | 0.00024445 | 0.321416259 |
| -0.1756922 | cg04927537 | LGALS3BP     | 17 | 0.00645655 | 0.697179269 |
| -0.1539816 | cg11202345 | LGALS3BP;LC  | 17 | 0.007777   | 0.379543543 |
| -0.1625897 | cg14870271 | LGALS3BP;LC  | 17 | 0.00503565 | 0.640342152 |
| -0.184024  | cg23290146 | LGALS9;LGAL  | 17 | 0.02382222 | 0.563547961 |
| -0.1466694 | cg21157094 | LGALS9;LGAL  | 17 | 0.00686775 | 0.483501645 |
| -0.1388523 | cg27625456 | LGALS9;LGAL  | 17 | 0.02134655 | 0.644090098 |
| -0.129929  | cg24387542 | LGALS9B      | 17 | 0.00362267 | 0.432533545 |
| -0.115536  | cg13597417 | LGALS9C      | 17 | 0.00402191 | 0.443946879 |
| -0.1509899 | cg02300379 | LGI1         | 10 | 0.00063983 | 0.454301041 |
| -0.1247936 | cg04468092 | LGI2         | 4  | 0.00398277 | 0.884651882 |
| -0.1091266 | cg06767339 | LGI3         | 8  | 0.03996044 | 0.667288804 |
| -0.170992  | cg22464865 | LGI4         | 19 | 0.00129714 | 0.695869944 |
| -0.1651346 | cg11683364 | LGR6;LGR6;L  | 1  | 0.04498105 | 0.601314269 |
| -0.1431177 | cg10337540 | LHFP         | 13 | 0.0463456  | 0.391795627 |
| -0.1031971 | cg26658897 | LHFPL2       | 5  | 0.01209183 | 0.743489159 |
| -0.2385566 | cg16326367 | LHFPL2       | 5  | 0.02036808 | 0.674606755 |
| -0.1746158 | cg04159215 | LHPP;LHPP    | 10 | 0.0295908  | 0.738387022 |
| -0.1936523 | cg13473120 | LHX2         | 9  | 0.00156808 | 0.314739187 |
| -0.1806791 | cg14608020 | LHX2         | 9  | 0.00155684 | 0.388575103 |
| -0.1714107 | cg20939662 | LHX2         | 9  | 0.03499421 | 0.828176285 |
| -0.1366921 | cg01298678 | LHX2         | 9  | 0.03268605 | 0.752845022 |
| -0.1170218 | cg14305801 | LHX2         | 9  | 0.0091523  | 0.67176391  |
| -0.124599  | cg06626184 | LHX2         | 9  | 0.00049503 | 0.698954344 |
| -0.1057193 | cg06826341 | LHX4         | 1  | 0.04426878 | 0.319663063 |
| -0.1249384 | cg13572892 | LHX6;LHX6    | 9  | 0.02063083 | 0.421928949 |
| -0.1956994 | cg05128414 | LHX9         | 1  | 0.00036466 | 0.31645789  |
| -0.1841549 | cg17753347 | LHX9         | 1  | 0.04815227 | 0.85038104  |
| -0.1338293 | cg16353006 | LHX9         | 1  | 0.01785967 | 0.413358453 |
| -0.1125629 | cg08610862 | LHX9;LHX9    | 1  | 0.03166664 | 0.586530079 |
| -0.1078662 | cg08463788 | LHX9;LHX9    | 1  | 0.01878775 | 0.563068963 |

|            |            |               |    |            |             |
|------------|------------|---------------|----|------------|-------------|
| -0.1348566 | cg05920909 | LHX9;LHX9     | 1  | 0.00731227 | 0.584355161 |
| -0.1568311 | cg25384595 | LILRA1;LILRA  | 19 | 0.00814006 | 0.658655373 |
| -0.1476153 | cg19486673 | LILRA2;LILRA  | 19 | 0.01334893 | 0.591720088 |
| -0.1246399 | cg19216475 | LILRA2;LILRA  | 19 | 0.00019359 | 0.359076077 |
| -0.1189698 | cg07280593 | LILRA2;LILRA  | 19 | 0.0265974  | 0.706927323 |
| -0.2130069 | cg05365532 | LILRB1        | 19 | 0.00240163 | 0.5405895   |
| -0.1209547 | cg26649140 | LILRB1        | 19 | 0.0001566  | 0.319352312 |
| -0.1771603 | cg26778001 | LILRB1;LILRB1 | 19 | 0.00021223 | 0.256869493 |
| -0.1286482 | cg02340056 | LILRB1;LILRB1 | 19 | 0.02306408 | 0.732062681 |
| -0.1596397 | cg12161905 | LILRB4;LILRB4 | 19 | 0.01453997 | 0.674450694 |
| -0.110778  | cg03372852 | LILRP2        | 19 | 0.00041619 | 0.451370898 |
| -0.2259357 | cg16283183 | LIMD1         | 3  | 0.01634085 | 0.818522718 |
| -0.1025527 | cg25437886 | LIMD1         | 3  | 0.01403025 | 0.592723831 |
| -0.1092283 | cg05310309 | LIMS1         | 2  | 0.02839025 | 0.744954348 |
| -0.1457011 | cg00585790 | LIMS1;LIMS1   | 2  | 0.02290981 | 0.86753305  |
| -0.1394243 | cg03555157 | LIMS2;LIMS2   | 2  | 0.02006598 | 0.40945362  |
| -0.1210827 | cg04947052 | LIMS2;LIMS2   | 2  | 0.04892728 | 0.806381076 |
| -0.1082396 | cg01761729 | LIMS2;LIMS2   | 2  | 0.00341966 | 0.422402041 |
| -0.2161723 | cg17040753 | LIMS3-LOC44   | 2  | 0.02131471 | 0.554840083 |
| -0.1272585 | cg17728974 | LIN28B        | 6  | 0.0006477  | 0.440804506 |
| -0.1238187 | cg09797463 | LIPA;LIPA     | 10 | 0.03952168 | 0.760527994 |
| -0.1231851 | cg12581682 | LIPC          | 15 | 0.01281542 | 0.822656646 |
| -0.1419796 | cg25907743 | LIPN          | 10 | 0.00841116 | 0.802731198 |
| -0.1242844 | cg08767044 | LITAF;LITAF;L | 16 | 0.00152819 | 0.76520783  |
| -0.1206191 | cg10420838 | LIX1          | 5  | 0.01723745 | 0.841286388 |
| -0.1141256 | cg26083045 | LMCD1         | 3  | 0.04225746 | 0.52059521  |
| -0.1093737 | cg17453456 | LMNA;LMNA     | 1  | 0.00019465 | 0.221550415 |
| -0.1517119 | cg27182012 | LMNA;LMNA     | 1  | 0.00067935 | 0.852276143 |
| -0.1611852 | cg09554856 | LMO2          | 11 | 0.02573304 | 0.467153061 |
| -0.1377934 | cg08586426 | LMO2          | 11 | 0.00168146 | 0.735792284 |
| -0.1250769 | cg12004276 | LMO2;LMO2     | 11 | 0.01883396 | 0.644010354 |
| -0.131426  | cg12695685 | LMO2;LMO2     | 11 | 0.0075389  | 0.702474515 |
| -0.1247912 | cg00558702 | LMO3;LMO3     | 12 | 0.00156368 | 0.512918704 |
| -0.1308308 | cg17633576 | LMO3;LMO3     | 12 | 0.00309603 | 0.583408821 |
| -0.1442691 | cg26400954 | LMO7          | 13 | 0.0319744  | 0.628558936 |
| -0.1091542 | cg04757411 | LMO7          | 13 | 0.00448017 | 0.832156058 |
| -0.1527055 | cg18231184 | LMTK2         | 7  | 0.03117759 | 0.801362168 |
| -0.1756228 | cg18833788 | LMTK3         | 19 | 0.00988188 | 0.514450861 |
| -0.2363547 | cg13530999 | LMX1B         | 9  | 0.02117247 | 0.545885183 |
| -0.2276667 | cg15689835 | LMX1B         | 9  | 0.03031309 | 0.313728006 |
| -0.1196621 | cg14473662 | LMX1B         | 9  | 0.04566555 | 0.608660603 |
| -0.1104085 | cg13466694 | LMX1B         | 9  | 0.0380731  | 0.844946869 |
| -0.1547399 | cg13600622 | LMX1B         | 9  | 0.01967415 | 0.481409436 |
| -0.105543  | cg14325930 | LMX1B         | 9  | 0.01347545 | 0.738904765 |
| -0.1320166 | cg24546446 | LNX1          | 4  | 0.01360788 | 0.414534109 |
| -0.2029013 | cg18560915 | LNX1          | 4  | 0.01487829 | 0.719378394 |

|            |            |             |    |            |             |
|------------|------------|-------------|----|------------|-------------|
| -0.108531  | cg19453136 | LOC1001285  | 12 | 0.01933629 | 0.517780993 |
| -0.1445429 | cg00250123 | LOC1001300  | 4  | 0.01117212 | 0.417922856 |
| -0.1359586 | cg11372934 | LOC1001308  | 4  | 0.0089966  | 0.779948184 |
| -0.1117806 | cg23127323 | LOC1001308  | 4  | 0.00546957 | 0.432729984 |
| -0.1196538 | cg23543318 | LOC1001308  | 4  | 0.01999081 | 0.819383646 |
| -0.1247923 | cg18120259 | LOC1001323  | 6  | 0.02178138 | 0.857062776 |
| -0.1140903 | cg08859309 | LOC1001889  | 13 | 0.00838658 | 0.80948539  |
| -0.1083233 | cg20874785 | LOC1001895  | 2  | 0.00122855 | 0.619707016 |
| -0.2881184 | cg05709578 | LOC1001923  | 8  | 0.03634141 | 0.707152675 |
| -0.1915993 | cg21314603 | LOC1002718  | 2  | 0.01978616 | 0.681709815 |
| -0.1596884 | cg15858970 | LOC1002877  | 6  | 0.02920602 | 0.791355534 |
| -0.1479993 | cg00230120 | LOC1002926  | 12 | 0.0060865  | 0.853135148 |
| -0.1407998 | cg02347881 | LOC144776   | 13 | 0.01019385 | 0.839737783 |
| -0.1294103 | cg20034372 | LOC145845   | 15 | 0.01960128 | 0.371266207 |
| -0.1218181 | cg26727768 | LOC145845   | 15 | 0.02703979 | 0.621714155 |
| -0.1150744 | cg14891209 | LOC145845   | 15 | 0.00020134 | 0.282173561 |
| -0.2189231 | cg00213301 | LOC145845   | 15 | 0.02757362 | 0.625444425 |
| -0.2178276 | cg14475966 | LOC145845   | 15 | 0.00026132 | 0.764328578 |
| -0.1787349 | cg11965311 | LOC145845   | 15 | 0.02322024 | 0.806821834 |
| -0.1759233 | cg12309653 | LOC145845   | 15 | 0.0016427  | 0.486769711 |
| -0.151687  | cg24956533 | LOC145845   | 15 | 0.02778389 | 0.800026815 |
| -0.1030074 | cg22444584 | LOC145845   | 15 | 0.00823275 | 0.625967608 |
| -0.1022305 | cg06451900 | LOC145845   | 15 | 0.00628321 | 0.699762296 |
| -0.1703629 | cg00216138 | LOC145845   | 15 | 0.00011921 | 0.565322482 |
| -0.1692972 | cg13930544 | LOC148824;C | 1  | 0.00486142 | 0.446421748 |
| -0.1158958 | cg12963656 | LOC152225   | 3  | 0.00735398 | 0.800341294 |
| -0.1830834 | cg05429448 | LOC152225   | 3  | 0.00262805 | 0.808399408 |
| -0.1163856 | cg04233669 | LOC153328   | 5  | 0.00127001 | 0.65945007  |
| -0.1916461 | cg15046507 | LOC221122   | 11 | 6.37E-05   | 0.236252455 |
| -0.1882409 | cg22093306 | LOC254559   | 15 | 0.00460444 | 0.468916995 |
| -0.1170572 | cg15129183 | LOC257358   | 5  | 0.00354684 | 0.784164067 |
| -0.1322461 | cg09802818 | LOC283404   | 12 | 0.01399362 | 0.642951463 |
| -0.1642819 | cg22108646 | LOC283999   | 17 | 0.03399496 | 0.851502252 |
| -0.1512213 | cg20653009 | LOC284100   | 17 | 0.01196252 | 0.481586466 |
| -0.1728748 | cg00220661 | LOC284276   | 18 | 0.00283463 | 0.320701289 |
| -0.2531234 | cg12119625 | LOC284379   | 19 | 0.02457508 | 0.714256149 |
| -0.1718342 | cg17907200 | LOC284661   | 1  | 0.0091155  | 0.779260278 |
| -0.1641074 | cg01723706 | LOC285419   | 4  | 0.00592233 | 0.566644771 |
| -0.1601385 | cg15400629 | LOC285548   | 4  | 0.0232347  | 0.615912419 |
| -0.1446719 | cg23987134 | LOC285696   | 5  | 0.023585   | 0.864934287 |
| -0.1311729 | cg23606396 | LOC285830;L | 6  | 0.04686158 | 0.835224414 |
| -0.128902  | cg12035144 | LOC285830;L | 6  | 0.01056196 | 0.397696465 |
| -0.1161094 | cg26701510 | LOC285830;L | 6  | 0.00756769 | 0.659112961 |
| -0.1092095 | cg01751584 | LOC286359   | 9  | 0.01718755 | 0.781994373 |
| -0.1013494 | cg02357336 | LOC339524   | 1  | 0.0082955  | 0.489769983 |
| -0.1876745 | cg07068655 | LOC340357   | 8  | 0.00071774 | 0.297126481 |



|            |            |              |    |            |             |
|------------|------------|--------------|----|------------|-------------|
| -0.1749561 | cg19047868 | LOC404266;t  | 17 | 0.0359879  | 0.586700789 |
| -0.158244  | cg00711072 | LOC404266;t  | 17 | 0.03181354 | 0.717036885 |
| -0.1637376 | cg12744859 | LOC404266;t  | 17 | 0.04235091 | 0.578203715 |
| -0.1624012 | cg21242356 | LOC404266;L  | 17 | 0.0012049  | 0.400259819 |
| -0.1450872 | cg17062109 | LOC404266;L  | 17 | 0.03678662 | 0.35370617  |
| -0.1274242 | cg22583148 | LOC404266;L  | 17 | 0.04080219 | 0.481421128 |
| -0.1101449 | cg15908709 | LOC404266;L  | 17 | 0.00673317 | 0.426835785 |
| -0.1270854 | cg17528189 | LOC440040    | 11 | 0.01330568 | 0.292258227 |
| -0.1468727 | cg21350349 | LOC440839;F  | 2  | 0.00581964 | 0.365625578 |
| -0.1240933 | cg01821850 | LOC440910    | 2  | 0.00230751 | 0.656937483 |
| -0.1001081 | cg05146756 | LOC554202    | 9  | 0.00332866 | 0.345528053 |
| -0.1539569 | cg10930289 | LOC645323    | 5  | 0.03278168 | 0.884080823 |
| -0.1316811 | cg08287551 | LOC645323    | 5  | 0.00381517 | 0.535829121 |
| -0.1237283 | cg01878406 | LOC646627    | 1  | 0.00126085 | 0.33147585  |
| -0.1364852 | cg23590187 | LOC646762    | 7  | 0.01343423 | 0.375432239 |
| -0.1254861 | cg08682625 | LOC727677    | 8  | 0.03008269 | 0.789004138 |
| -0.1116607 | cg16621633 | LOC728276    | 16 | 0.04694227 | 0.585561044 |
| -0.1612508 | cg09048205 | LOC728613    | 5  | 0.01877434 | 0.767375186 |
| -0.1155856 | cg20414364 | LOC728613    | 5  | 0.00633663 | 0.692406511 |
| -0.1995169 | cg05825085 | LOC732275    | 16 | 0.0450465  | 0.776820628 |
| -0.1243059 | cg23345292 | LOXHD1;LOX   | 18 | 0.00779371 | 0.569487937 |
| -0.1173606 | cg25883083 | LPAR5;LPAR5  | 12 | 0.00475109 | 0.417731299 |
| -0.1389501 | cg05661533 | LPCAT1       | 5  | 0.02524004 | 0.65920522  |
| -0.1193918 | cg16225703 | LPHN3        | 4  | 0.0003561  | 0.779496521 |
| -0.124041  | cg12646794 | LPHN3        | 4  | 0.00178395 | 0.497414517 |
| -0.1441423 | cg12297546 | LPP;LPP      | 3  | 0.00393952 | 0.842728274 |
| -0.1251102 | cg00902153 | LPP;LPP;LPP  | 3  | 0.00814392 | 0.369042717 |
| -0.1228582 | cg04773529 | LPP;LPP;LPP  | 3  | 0.00024258 | 0.4140165   |
| -0.1127022 | cg02011953 | LPPR1        | 9  | 0.00202105 | 0.557149389 |
| -0.1058803 | cg02044895 | LPXN;LPXN;L  | 11 | 0.04076783 | 0.270634112 |
| -0.1085681 | cg20294319 | LRCH1;LRCH1  | 13 | 0.00693563 | 0.468103208 |
| -0.1270381 | cg17272620 | LRG1         | 19 | 0.04722795 | 0.748875912 |
| -0.1533263 | cg18005280 | LRIG1        | 3  | 0.04940705 | 0.679325519 |
| -0.1225891 | cg24112628 | LRP11        | 6  | 0.02040546 | 0.841893201 |
| -0.2260417 | cg03252605 | LRP1B        | 2  | 0.00267808 | 0.410763915 |
| -0.1830874 | cg16671674 | LRP1B        | 2  | 0.0018887  | 0.660234483 |
| -0.1612149 | cg15664504 | LRP1B        | 2  | 0.0296904  | 0.672954668 |
| -0.137276  | cg23238677 | LRP2         | 2  | 0.0059395  | 0.529762884 |
| -0.130317  | cg08356705 | LRP5         | 11 | 0.01357102 | 0.487450362 |
| -0.1104115 | cg24380380 | LRP5         | 11 | 0.01789941 | 0.815282784 |
| -0.1053165 | cg03678566 | LRP5         | 11 | 0.01711042 | 0.774590847 |
| -0.2384229 | cg26838900 | LRRC15;LRRC  | 3  | 0.00201649 | 0.79656132  |
| -0.1176426 | cg05076755 | LRRC32;LRRC  | 11 | 0.00814686 | 0.685959586 |
| -0.1023139 | cg04052606 | LRRC43;LRRC  | 12 | 0.01773726 | 0.73261765  |
| -0.1382609 | cg19497511 | LRRFIP1;LRRF | 2  | 0.01807647 | 0.434921508 |
| -0.1263347 | cg10984625 | LRRFIP1;LRRF | 2  | 0.03164256 | 0.457383173 |

|            |            |              |    |            |             |
|------------|------------|--------------|----|------------|-------------|
| -0.1914052 | cg09037813 | LRRFIP1;LRRF | 2  | 0.03844434 | 0.615481685 |
| -0.1749312 | cg15819128 | LRRFIP1;LRRF | 2  | 0.01936809 | 0.430124312 |
| -0.1519626 | cg11143485 | LRRK1        | 15 | 0.02280539 | 0.708221586 |
| -0.1206032 | cg11252801 | LRRTM4;LRR   | 2  | 0.00269227 | 0.520779129 |
| -0.1125294 | cg01607232 | LSM2         | 6  | 0.00213103 | 0.27746434  |
| -0.2677431 | cg12283393 | LSP1         | 11 | 0.0031429  | 0.751186615 |
| -0.1760495 | cg16795830 | LST1;LST1;LS | 6  | 0.00387406 | 0.762536668 |
| -0.1533929 | cg19271190 | LST1;LST1;LS | 6  | 0.01111155 | 0.588389975 |
| -0.1220837 | cg27616007 | LST1;LST1;LS | 6  | 0.01138656 | 0.654392966 |
| -0.2762294 | cg09531959 | LST1;LST1;LS | 6  | 0.0051635  | 0.444402769 |
| -0.2538049 | cg09761080 | LST1;LST1;LS | 6  | 0.00536273 | 0.566965353 |
| -0.1153993 | cg14340889 | LTBP2        | 14 | 0.01408375 | 0.556418856 |
| -0.1125478 | cg14986500 | LTBP2        | 14 | 0.00594313 | 0.71305856  |
| -0.1954338 | cg03491087 | LTBP2        | 14 | 0.00822841 | 0.618042374 |
| -0.1188589 | cg03928874 | LY86         | 6  | 0.0141442  | 0.661122254 |
| -0.1708737 | cg04222933 | LY9          | 1  | 0.0260365  | 0.543405814 |
| -0.1101299 | cg10316357 | LY9;LY9      | 1  | 0.0008783  | 0.268692789 |
| -0.1330682 | cg18865207 | LY9;LY9      | 1  | 0.00047393 | 0.61877193  |
| -0.2448261 | cg23732024 | LY96         | 8  | 0.00253545 | 0.863754513 |
| -0.1537472 | cg13213009 | LY96         | 8  | 0.01546685 | 0.620262595 |
| -0.1291972 | cg08806632 | LYL1         | 19 | 0.00823369 | 0.604153819 |
| -0.1283014 | cg03659680 | LYN;LYN      | 8  | 0.01756936 | 0.831197289 |
| -0.1491876 | cg17806401 | LYN;LYN      | 8  | 0.00277312 | 0.45144138  |
| -0.250692  | cg05095252 | LYPD6        | 2  | 0.032524   | 0.676310414 |
| -0.114718  | cg20360286 | LYPD6        | 2  | 0.02211313 | 0.586145103 |
| -0.1763039 | cg08224563 | LYRM1;LYRM   | 16 | 0.04882133 | 0.837927049 |
| -0.1317549 | cg21374754 | LYZL4        | 3  | 0.00434106 | 0.801479355 |
| -0.1301842 | cg22367631 | MACF1        | 1  | 0.00061596 | 0.552061154 |
| -0.1138791 | cg26864766 | MACF1;MAC    | 1  | 0.03943126 | 0.659726488 |
| -0.1103702 | cg25786640 | MAD1L1;MA    | 7  | 0.03516667 | 0.888351801 |
| -0.1682613 | cg17309904 | MAD1L1;MA    | 7  | 0.03028907 | 0.580154373 |
| -0.1659507 | cg13798585 | MAD1L1;MA    | 7  | 0.02783492 | 0.824587642 |
| -0.1151811 | cg00502509 | MAD1L1;MA    | 7  | 0.01349357 | 0.869396046 |
| -0.1580459 | cg27109748 | MAD1L1;MA    | 7  | 0.02366962 | 0.749978473 |
| -0.1107253 | cg21728101 | MAD1L1;MA    | 7  | 0.00190053 | 0.718393555 |
| -0.1738781 | cg23968893 | MAEL         | 1  | 0.01732491 | 0.801207394 |
| -0.1635676 | cg01403010 | MAFF;MAFF;   | 22 | 0.01988813 | 0.75273449  |
| -0.1421073 | cg01406317 | Magmas       | 16 | 0.01026096 | 0.774084723 |
| -0.1345584 | cg20209290 | MAK;MAK      | 6  | 0.02386248 | 0.871736112 |
| -0.1216395 | cg14649449 | MAMDC2       | 9  | 0.00207283 | 0.578481158 |
| -0.1036688 | cg01093786 | MAML2        | 11 | 0.00019707 | 0.24744146  |
| -0.2204662 | cg15521790 | MAML2        | 11 | 0.04852209 | 0.374584927 |
| -0.2101403 | cg03428047 | MAML3        | 4  | 0.00063989 | 0.278644011 |
| -0.2091149 | cg03597159 | MAML3        | 4  | 0.01478977 | 0.616490493 |
| -0.2030807 | cg23206160 | MAML3        | 4  | 0.00053308 | 0.363291011 |
| -0.1613087 | cg14025021 | MAP1A        | 15 | 0.00854485 | 0.270419336 |

|            |            |            |    |            |             |
|------------|------------|------------|----|------------|-------------|
| -0.1530217 | cg08880153 | MAP1A      | 15 | 0.01169057 | 0.729404332 |
| -0.1512433 | cg15076869 | MAP2K2     | 19 | 0.01842637 | 0.530082133 |
| -0.1117985 | cg14573876 | MAP2K2     | 19 | 0.00628502 | 0.603910711 |
| -0.1032636 | cg00146864 | MAP3K14    | 17 | 0.01331285 | 0.58158176  |
| -0.2111942 | cg19982668 | MAP3K3;MA  | 17 | 0.0052028  | 0.794572412 |
| -0.2096353 | cg24999105 | MAP3K5     | 6  | 0.02381308 | 0.854911854 |
| -0.2028153 | cg18914962 | MAP3K5     | 6  | 0.02645559 | 0.805141457 |
| -0.1919788 | cg07474842 | MAP3K5     | 6  | 0.01695535 | 0.825039156 |
| -0.1271849 | cg21778987 | MAP3K5     | 6  | 0.00017209 | 0.629570019 |
| -0.1261512 | cg20996351 | MAP3K6     | 1  | 0.00044198 | 0.687018572 |
| -0.1043951 | cg09331409 | MAP6;MAP6  | 11 | 0.006233   | 0.254708199 |
| -0.1493941 | cg25538883 | MAPK4      | 18 | 0.00470846 | 0.775609583 |
| -0.1564476 | cg26946769 | MAPK4      | 18 | 0.03152169 | 0.637840999 |
| -0.1472363 | cg14303674 | MAPRE1     | 20 | 0.04460963 | 0.545678274 |
| -0.1322419 | cg16805068 | MAPRE1     | 20 | 0.01141079 | 0.799081655 |
| -0.1687756 | cg20840174 | MAPT;MAPT  | 17 | 0.02386726 | 0.442486038 |
| -0.1429247 | cg02570981 | MARCH1     | 4  | 0.04862341 | 0.733889722 |
| -0.1144706 | cg15498306 | MARCH1;MA  | 4  | 0.00718675 | 0.594096226 |
| -0.1621275 | cg13963033 | MARCH3     | 5  | 0.03634141 | 0.602125931 |
| -0.1427854 | cg18322693 | MARCH4     | 2  | 0.01042043 | 0.495395483 |
| -0.1115508 | cg09601514 | MARCO      | 2  | 0.04091113 | 0.373168179 |
| -0.1303173 | cg11009736 | MARCO      | 2  | 0.04767085 | 0.647015317 |
| -0.1620254 | cg25730428 | MAS1L      | 6  | 0.01766129 | 0.828360365 |
| -0.2534339 | cg13305823 | MAS1L      | 6  | 0.00191206 | 0.534741236 |
| -0.2059176 | cg25818109 | MASP1      | 3  | 0.0131134  | 0.532513951 |
| -0.1367993 | cg25391820 | MATR3;SNHC | 5  | 0.01777994 | 0.401917144 |
| -0.1064798 | cg01643441 | MAX;MAX;M  | 14 | 0.00710599 | 0.473513614 |
| -0.1030731 | cg12845756 | MB;MB;MB   | 22 | 0.00195698 | 0.390064169 |
| -0.1039297 | cg08535978 | MBNL1;MBN  | 3  | 0.02385018 | 0.422781012 |
| -0.2386988 | cg27262850 | MBP;MBP    | 18 | 0.01738521 | 0.728814856 |
| -0.1770839 | cg16762684 | MBP;MBP    | 18 | 0.00555981 | 0.354261523 |
| -0.1530154 | cg15566919 | MBP;MBP    | 18 | 0.03107036 | 0.352842876 |
| -0.138905  | cg24446429 | MBP;MBP    | 18 | 0.01448714 | 0.740642752 |
| -0.1342523 | cg24853975 | MCC        | 5  | 0.00866493 | 0.620904233 |
| -0.1290553 | cg08213909 | MCC;MCC    | 5  | 0.01194262 | 0.747202032 |
| -0.1261584 | cg06062378 | MCC;MCC    | 5  | 0.00300966 | 0.726017891 |
| -0.1143674 | cg11521563 | MCF2L;MCF2 | 13 | 0.0260128  | 0.614212111 |
| -0.1021571 | cg12560772 | MCHR2;MCH  | 6  | 0.00197053 | 0.614827056 |
| -0.1413969 | cg12210618 | MCOLN3     | 1  | 0.01885763 | 0.628325522 |
| -0.1180389 | cg03187301 | MCRS1;MCR  | 12 | 0.00828186 | 0.790095356 |
| -0.1398978 | cg06778183 | MCTP1;MCTI | 5  | 0.00575433 | 0.70250067  |
| -0.1259144 | cg04231905 | MCTP2;MCTI | 15 | 0.00086149 | 0.471354947 |
| -0.1790654 | cg01278975 | MDGA1      | 6  | 0.00240426 | 0.890092084 |
| -0.1101985 | cg19503462 | MDGA2      | 14 | 0.00592705 | 0.332637927 |
| -0.1054605 | cg02493602 | ME3;ME3;MI | 11 | 0.00212498 | 0.689550811 |
| -0.1869374 | cg02556393 | MECOM;MEC  | 3  | 0.0218112  | 0.836676892 |

|            |            |             |    |            |             |
|------------|------------|-------------|----|------------|-------------|
| -0.1451973 | cg25956089 | MECOM;MEC   | 3  | 0.04138306 | 0.479758064 |
| -0.1177354 | cg10371155 | MED1        | 17 | 0.00795011 | 0.798389685 |
| -0.2095115 | cg27657537 | MED15;MED   | 22 | 0.00955148 | 0.334319882 |
| -0.158777  | cg05689413 | MED20       | 6  | 0.0214366  | 0.397573856 |
| -0.1026696 | cg03301498 | MED29       | 19 | 0.00767248 | 0.728642989 |
| -0.1161425 | cg00599219 | MEFV        | 16 | 0.0062229  | 0.627269441 |
| -0.1264489 | cg26846864 | MEFV        | 16 | 0.00568968 | 0.607537297 |
| -0.1267607 | cg05554494 | MEFV        | 16 | 0.00509171 | 0.772350551 |
| -0.1858993 | cg03919650 | MEFV        | 16 | 5.47E-05   | 0.396320989 |
| -0.1357612 | cg04391135 | MEGF6       | 1  | 0.01756808 | 0.879708957 |
| -0.103096  | cg09187007 | MEGF6       | 1  | 0.00073663 | 0.354385506 |
| -0.1573788 | cg09896544 | MEIS2;MEIS2 | 15 | 0.00074364 | 0.303122982 |
| -0.1408003 | cg09425926 | MEST        | 7  | 0.01121541 | 0.686162704 |
| -0.1052899 | cg02490034 | MEST        | 7  | 0.03084269 | 0.832205399 |
| -0.1922937 | cg11056055 | MET;MET     | 7  | 0.02525069 | 0.712421326 |
| -0.127183  | cg24197567 | MET;MET     | 7  | 0.00052716 | 0.52444349  |
| -0.1216383 | cg12393623 | METRNL      | 17 | 0.00671868 | 0.662768069 |
| -0.1209352 | cg12806347 | METRNL      | 17 | 0.03198357 | 0.840063778 |
| -0.1608836 | cg02633149 | METRNL      | 17 | 0.00741445 | 0.724839479 |
| -0.1861478 | cg15224459 | METRNL      | 17 | 0.00059176 | 0.621218887 |
| -0.177613  | cg07917978 | METTL9;MET  | 16 | 0.00313066 | 0.403272064 |
| -0.1583094 | cg09808606 | METTL9;MET  | 16 | 0.04138739 | 0.715413342 |
| -0.1655114 | cg10201923 | MFAP2;MFAI  | 1  | 0.01732485 | 0.92856556  |
| -0.1269909 | cg19306948 | MFAP2;MFAI  | 1  | 0.03189847 | 0.67920356  |
| -0.1031334 | cg12695612 | MFAP2;MFAI  | 1  | 0.01902294 | 0.790481733 |
| -0.2250203 | cg17744878 | MFAP2;MFAI  | 1  | 0.01420194 | 0.653216097 |
| -0.1758274 | cg07086226 | MFSD7       | 4  | 0.03971399 | 0.438700742 |
| -0.1726714 | cg01149192 | MGAT1;MGA   | 5  | 0.03246689 | 0.693138903 |
| -0.1714028 | cg00514575 | MGAT1;MGA   | 5  | 0.0235667  | 0.687700121 |
| -0.1713481 | cg04212021 | MGAT1;MGA   | 5  | 0.00718599 | 0.807060224 |
| -0.1351049 | cg21868063 | MGAT5B;MG   | 17 | 0.00821036 | 0.559592605 |
| -0.1134073 | cg05514299 | MGAT5B;MG   | 17 | 0.00261008 | 0.470990713 |
| -0.1075254 | cg09277376 | MGC12982    | 1  | 0.04118659 | 0.468358264 |
| -0.107003  | cg04400653 | MGC26597    | 6  | 0.0085621  | 0.71925159  |
| -0.1008556 | cg06975633 | MGC27382    | 1  | 0.02642397 | 0.537476862 |
| -0.2305181 | cg10435609 | MGC27382    | 1  | 0.01664493 | 0.774361047 |
| -0.1662176 | cg03148889 | MGC27382    | 1  | 0.01726423 | 0.465121466 |
| -0.148994  | cg24113496 | MGC29506    | 5  | 0.00351398 | 0.505576678 |
| -0.1068654 | cg07493858 | MGC45800    | 4  | 0.0136441  | 0.677335737 |
| -0.1498336 | cg11393122 | MGC45800    | 4  | 0.00568172 | 0.473276028 |
| -0.1078429 | cg18304448 | MGC45800    | 4  | 0.03544697 | 0.780365054 |
| -0.1351353 | cg05812452 | MGC45800    | 4  | 0.0257503  | 0.776998186 |
| -0.1036502 | cg02353258 | MGC45800    | 4  | 0.00534824 | 0.705601751 |
| -0.1186258 | cg23370946 | MGC45800    | 4  | 0.0030624  | 0.678870466 |
| -0.1612797 | cg16027775 | MGLL;MGLL   | 3  | 3.44E-05   | 0.535174981 |
| -0.1409948 | cg22575127 | MGMT        | 10 | 0.00477065 | 0.849179824 |

|            |            |             |    |            |             |
|------------|------------|-------------|----|------------|-------------|
| -0.2741728 | cg18148349 | MGMT        | 10 | 0.01874822 | 0.839854279 |
| -0.2677627 | cg03821121 | MICAL2      | 11 | 0.02459491 | 0.652784556 |
| -0.1693726 | cg03078520 | MICAL3;MIC  | 22 | 0.00804034 | 0.755140329 |
| -0.1582778 | cg04505313 | MICB        | 6  | 0.01373858 | 0.427408295 |
| -0.1501325 | cg00044354 | MIER1;WDR7  | 1  | 0.01167538 | 0.375547821 |
| -0.1392832 | cg26614229 | MIR1182;FAI | 1  | 8.11E-05   | 0.301738321 |
| -0.1358359 | cg22492271 | MIR1200;ELN | 7  | 0.01820348 | 0.747094959 |
| -0.1351983 | cg05076730 | MIR1207;PV1 | 8  | 0.01860501 | 0.835869236 |
| -0.1317158 | cg00444740 | MIR1208     | 8  | 0.04202905 | 0.862966337 |
| -0.1271532 | cg07018107 | MIR1208     | 8  | 0.03402257 | 0.826494456 |
| -0.1244555 | cg07191657 | MIR1265     | 10 | 0.04539571 | 0.692290138 |
| -0.1235195 | cg27292264 | MIR1280;EEF | 3  | 0.00101513 | 0.348097026 |
| -0.1180433 | cg26377653 | MIR1283-1   | 19 | 0.0315651  | 0.520461998 |
| -0.1116092 | cg02991888 | MIR1283-2;N | 19 | 0.01292526 | 0.718849609 |
| -0.1091584 | cg00176888 | MIR142      | 17 | 0.01796333 | 0.619827856 |
| -0.1032859 | cg00477302 | MIR182      | 7  | 0.0006257  | 0.358169935 |
| -0.1030184 | cg23955417 | MIR1976;RPS | 1  | 0.00451326 | 0.486279639 |
| -0.1019312 | cg17799287 | MIR19A;MIR  | 13 | 0.01627092 | 0.406473419 |
| -0.1010005 | cg02515217 | MIR21       | 17 | 0.0261502  | 0.700269293 |
| -0.2196055 | cg15759721 | MIR21       | 17 | 0.01284363 | 0.678488404 |
| -0.1027794 | cg25687874 | MIR2117     | 17 | 0.0006412  | 0.517496321 |
| -0.1304891 | cg03184776 | MIR2117     | 17 | 0.00229539 | 0.433391794 |
| -0.1009107 | cg16506910 | MIR30A      | 6  | 0.00452125 | 0.738349155 |
| -0.2065055 | cg10583119 | MIR518D     | 19 | 0.00177914 | 0.339152379 |
| -0.114671  | cg17670263 | MIR520C     | 19 | 0.01149633 | 0.355355    |
| -0.1038907 | cg02229135 | MIR548F5;NI | 13 | 0.03448197 | 0.393237144 |
| -0.1929374 | cg26664528 | MIR548H4;N  | 15 | 0.01249831 | 0.701085383 |
| -0.15923   | cg20587874 | MIR548N     | 2  | 0.00067309 | 0.492897585 |
| -0.1197037 | cg01706263 | MIR598;XKR6 | 8  | 0.00053355 | 0.47126337  |
| -0.1790926 | cg12242373 | MIR609;C10c | 10 | 0.00431071 | 0.877388309 |
| -0.1283572 | cg03775802 | MIR609;C10c | 10 | 0.03888288 | 0.664333076 |
| -0.1010311 | cg00990350 | MIR609;C10c | 10 | 0.00989552 | 0.602781561 |
| -0.1280825 | cg14294096 | MIR670      | 11 | 0.00346623 | 0.686839445 |
| -0.105745  | cg23176340 | MIR7-2      | 15 | 0.04871509 | 0.459600677 |
| -0.1532205 | cg18824446 | MIR7-2      | 15 | 0.00102382 | 0.41742101  |
| -0.1207325 | cg25340688 | MIR886      | 5  | 0.04962147 | 0.525738613 |
| -0.1317499 | cg18496212 | MITF        | 3  | 0.00515849 | 0.845946507 |
| -0.1329922 | cg04811592 | MITF;MITF   | 3  | 0.0107031  | 0.553363622 |
| -0.1048907 | cg15571405 | MKLN1       | 7  | 0.00079924 | 0.211479698 |
| -0.1049631 | cg10854441 | MLC1;MLC1   | 22 | 0.04230722 | 0.50874113  |
| -0.1501702 | cg03677952 | MLC1;MLC1   | 22 | 0.01351689 | 0.582899457 |
| -0.1304513 | cg17169998 | MLC1;MLC1;  | 22 | 0.00089245 | 0.304536395 |
| -0.1266593 | cg08660915 | MLC1;MLC1;  | 22 | 0.00089553 | 0.449771116 |
| -0.1044816 | cg05861567 | MLC1;MLC1;  | 22 | 0.00869463 | 0.483666242 |
| -0.1451286 | cg22729539 | MLXIP       | 12 | 0.03926363 | 0.846488261 |
| -0.134865  | cg03509949 | MMP19       | 12 | 0.0096996  | 0.372442339 |

|            |            |            |    |            |             |
|------------|------------|------------|----|------------|-------------|
| -0.124467  | cg17865265 | MMP19      | 12 | 0.00790726 | 0.695092411 |
| -0.2091424 | cg24901637 | MMRN1      | 4  | 0.03004196 | 0.317888813 |
| -0.1222345 | cg07436701 | MMRN2;SNC  | 10 | 0.00062583 | 0.797893218 |
| -0.1467236 | cg05304729 | MNDA       | 1  | 0.00355027 | 0.58977692  |
| -0.1243492 | cg06896207 | MOBKL2A    | 19 | 0.02518713 | 0.571321983 |
| -0.2148106 | cg19519319 | MOBKL2A    | 19 | 0.01636327 | 0.783670539 |
| -0.1068122 | cg21876918 | MOBKL2A    | 19 | 0.01178305 | 0.748965777 |
| -0.1518683 | cg24938761 | MOBKL2A    | 19 | 0.00642529 | 0.697327477 |
| -0.1068666 | cg13648550 | MOBKL2B    | 9  | 0.0058751  | 0.70608503  |
| -0.1648816 | cg06297863 | MOG;MOG;M  | 6  | 0.03924715 | 0.717716741 |
| -0.1450995 | cg01261013 | MORC3      | 21 | 0.04041319 | 0.674728554 |
| -0.1835222 | cg11621113 | MORG1;MOF  | 19 | 0.00688935 | 0.348864909 |
| -0.1415413 | cg00032879 | MORN1      | 1  | 0.004821   | 0.76804582  |
| -0.1386046 | cg23110109 | MORN3      | 12 | 0.00538469 | 0.29274534  |
| -0.1400454 | cg03188064 | MORN3      | 12 | 0.00920335 | 0.83003863  |
| -0.2112302 | cg05482413 | MOXD2      | 7  | 0.02224384 | 0.6368279   |
| -0.1522561 | cg01422009 | MPG        | 16 | 0.04810873 | 0.441776367 |
| -0.2342304 | cg18936620 | MPL        | 1  | 0.00191143 | 0.654678358 |
| -0.1087637 | cg22331200 | MPO        | 17 | 0.00174324 | 0.61579555  |
| -0.113294  | cg04988978 | MPO        | 17 | 0.00054304 | 0.393216753 |
| -0.1823191 | cg17327331 | MPP5       | 14 | 0.023503   | 0.490255776 |
| -0.1596474 | cg14599440 | MPPE1      | 18 | 0.00814686 | 0.532787145 |
| -0.1436367 | cg02543159 | MPPED1     | 22 | 0.02733365 | 0.703549365 |
| -0.1330651 | cg08591668 | MRE11A;MR  | 11 | 0.0178459  | 0.5319164   |
| -0.1323834 | cg13062935 | MRGPRX2    | 11 | 0.00924069 | 0.64871384  |
| -0.1109168 | cg23247274 | MRP63;MRP  | 13 | 0.00801505 | 0.152000803 |
| -0.1103456 | cg15897435 | MRPL1      | 4  | 0.02651006 | 0.499921551 |
| -0.1021781 | cg26371345 | MRPL14     | 6  | 0.00013359 | 0.496808111 |
| -0.1231677 | cg23924737 | MRPS23     | 17 | 0.02031478 | 0.667489214 |
| -0.1858373 | cg06746274 | MS4A13;MS4 | 11 | 0.00493125 | 0.620261246 |
| -0.1560529 | cg17173423 | MS4A3;MS4  | 11 | 0.0283899  | 0.726423065 |
| -0.1449597 | cg02893799 | MS4A4A     | 11 | 0.04402121 | 0.585406229 |
| -0.1064552 | cg08564601 | MS4A4A     | 11 | 0.04238234 | 0.809179238 |
| -0.1502933 | cg01229998 | MS4A4A;MS4 | 11 | 0.01844644 | 0.323483736 |
| -0.1094315 | cg26250585 | MS4A6A;MS4 | 11 | 0.02003657 | 0.758747585 |
| -0.1283784 | cg00673646 | MS4A6A;MS4 | 11 | 0.00088647 | 0.538925481 |
| -0.1103444 | cg18570331 | MS4A6E     | 11 | 0.00034762 | 0.199728823 |
| -0.102742  | cg10891482 | MS4A8B;MS4 | 11 | 0.00388785 | 0.50433878  |
| -0.1024812 | cg14200364 | MSH4       | 1  | 0.02396889 | 0.652893283 |
| -0.1639978 | cg22801561 | MSI2;MSI2  | 17 | 0.014429   | 0.766544239 |
| -0.1231157 | cg16773768 | MSRA;MSRA  | 8  | 0.04150171 | 0.68842021  |
| -0.1067627 | cg11951818 | MSX2       | 5  | 0.002691   | 0.745329045 |
| -0.1419882 | cg01603396 | MSX2       | 5  | 0.00662612 | 0.761673815 |
| -0.1044682 | cg04496824 | MTF1       | 1  | 0.02543313 | 0.623600999 |
| -0.1198704 | cg00791074 | MTHFD1L    | 6  | 0.0003098  | 0.595785316 |
| -0.1807007 | cg20694147 | MTHFD2;MT  | 2  | 0.00010527 | 0.277042326 |

|            |               |             |    |            |             |
|------------|---------------|-------------|----|------------|-------------|
| -0.1825272 | cg05959989    | MTL5;MTL5   | 11 | 0.02146523 | 0.655360951 |
| -0.1136909 | cg23398173    | MTPN;LUZP6  | 7  | 0.00116789 | 0.299294507 |
| -0.1070992 | cg10995381    | MTRR;MTRR   | 5  | 0.00561064 | 0.828407652 |
| -0.1069267 | cg16643473    | MUC15;MUC   | 11 | 0.0083632  | 0.690074181 |
| -0.1383536 | cg08120226    | MUC4;MUC4   | 3  | 0.0018887  | 0.546961736 |
| -0.1130755 | cg19800336    | MUPCDH;ML   | 11 | 0.00196967 | 0.600883599 |
| -0.1123994 | cg06752054    | MX2         | 21 | 0.00089065 | 0.822899198 |
| -0.1520414 | cg21390801    | MX2         | 21 | 0.03954381 | 0.803320999 |
| -0.1181605 | cg15281283    | MX2         | 21 | 0.04597606 | 0.637617238 |
| -0.1935493 | cg05656374    | MX2         | 21 | 0.00168317 | 0.682709793 |
| -0.2258056 | cg18465082    | MXD3;MXD3   | 5  | 0.03513932 | 0.57565873  |
| -0.1865599 | cg25368647    | MXD3;MXD3   | 5  | 0.01612716 | 0.81735748  |
| -0.1304499 | cg17342071    | MYEOV2;MY   | 2  | 0.02473767 | 0.688286236 |
| -0.1146106 | cg17594351    | MYF6        | 12 | 0.01235822 | 0.289022493 |
| -0.2106725 | cg14606858    | MYH16       | 7  | 0.00912027 | 0.515466495 |
| -0.1322346 | cg02558132    | MYLK;MYLK;l | 3  | 0.01111591 | 0.777731719 |
| -0.143309  | cg19611163    | MYLK;MYLK;l | 3  | 0.00656792 | 0.754792765 |
| -0.1115476 | cg12235788    | MYLK;MYLK;l | 3  | 0.04856706 | 0.736556719 |
| -0.1281515 | cg16402006    | MYLK4       | 6  | 0.04861742 | 0.850260985 |
| -0.1685863 | cg15453396    | MYLK4       | 6  | 0.00091461 | 0.808517954 |
| -0.1626268 | ch.5.432310R  | MYO10       | 5  | 0.00633087 | 0.214343541 |
| -0.1246278 | cg06742628    | MYO10       | 5  | 0.02343845 | 0.570668477 |
| -0.1170876 | cg20748397    | MYO15A      | 17 | 0.01363154 | 0.799259118 |
| -0.1072339 | cg24702069    | MYO16       | 13 | 0.01409267 | 0.603406534 |
| -0.1570057 | cg02920604    | MYO1E       | 15 | 0.00279065 | 0.254359225 |
| -0.1185652 | ch.15.814613R | MYO1E       | 15 | 0.00277956 | 0.272659951 |
| -0.1018052 | cg06787669    | MYO1G       | 7  | 0.00664795 | 0.801853229 |
| -0.1706022 | cg24590708    | MYO5C       | 15 | 0.03730118 | 0.796887302 |
| -0.2096978 | cg09681043    | MYO7B       | 2  | 0.03098904 | 0.396430852 |
| -0.1272562 | cg24128316    | MYOM1;MYC   | 18 | 0.00313488 | 0.439484148 |
| -0.1435937 | cg13428978    | MYOM2       | 8  | 0.04367075 | 0.583375311 |
| -0.1160697 | cg22843712    | MYOM2       | 8  | 0.02485922 | 0.806115651 |
| -0.1128885 | cg20103825    | MYOM2       | 8  | 0.00068644 | 0.281931799 |
| -0.1101152 | cg09584650    | MYOM2       | 8  | 0.03722507 | 0.490968834 |
| -0.1004584 | cg04956382    | MYOT;MYOT   | 5  | 0.00312403 | 0.626783465 |
| -0.1343919 | cg10215032    | MYT1L       | 2  | 0.01417806 | 0.341390009 |
| -0.2425317 | cg22388316    | MYT1L       | 2  | 0.03817585 | 0.76932169  |
| -0.1010195 | cg09716613    | N4BP2L1;N4I | 13 | 0.00190849 | 0.604986816 |
| -0.1014283 | cg08685085    | NACA;NACA;  | 12 | 0.02757068 | 0.777755118 |
| -0.1159186 | cg10774877    | NALCN       | 13 | 0.0032252  | 0.262516089 |
| -0.1088378 | cg25024321    | NALCN       | 13 | 0.04128186 | 0.776184884 |
| -0.1378706 | cg24324984    | NANOS2      | 19 | 0.00760619 | 0.520841982 |
| -0.1212609 | cg26609120    | NAPSB       | 19 | 0.00096713 | 0.566343617 |
| -0.1238847 | cg15474337    | NAPSB       | 19 | 0.0150454  | 0.73947364  |
| -0.1103504 | cg15797286    | NAT1;NAT1;† | 8  | 0.02819443 | 0.628686846 |
| -0.1415041 | cg12728240    | NAT8        | 2  | 0.00782547 | 0.486000602 |

|            |            |              |    |            |             |
|------------|------------|--------------|----|------------|-------------|
| -0.1003912 | cg08116137 | NAT8;ALMS1   | 2  | 0.02864608 | 0.605826794 |
| -0.1813053 | cg19323289 | NAV2         | 11 | 0.01145764 | 0.748228932 |
| -0.2128177 | cg19141316 | NAV2;NAV2;   | 11 | 0.02621259 | 0.896692947 |
| -0.2833066 | cg26406074 | NBEA         | 13 | 0.0490037  | 0.348401891 |
| -0.1769749 | cg02959112 | NBL1;NBL1    | 1  | 0.04141401 | 0.724707078 |
| -0.168956  | cg01747862 | NBLA00301    | 4  | 0.02323436 | 0.837088215 |
| -0.1587009 | cg18575740 | NBLA00301    | 4  | 0.03996182 | 0.738855639 |
| -0.1539179 | cg19095920 | NBLA00301    | 4  | 0.01430152 | 0.707215328 |
| -0.1488678 | cg26805882 | NBLA00301    | 4  | 0.00357674 | 0.856255065 |
| -0.1297433 | cg21383280 | NBLA00301    | 4  | 0.0004602  | 0.538417358 |
| -0.1417029 | cg10024909 | NBLA00301    | 4  | 0.00042068 | 0.663893964 |
| -0.1633626 | cg15234400 | NBLA00301    | 4  | 0.00056713 | 0.794914636 |
| -0.2197376 | cg16919569 | NBLA00301;f  | 4  | 0.00041304 | 0.76808599  |
| -0.1899914 | cg07681935 | NBLA00301;f  | 4  | 0.00056044 | 0.681734411 |
| -0.1591262 | cg21727486 | NCAM1;NCA    | 11 | 0.0039966  | 0.599929138 |
| -0.146682  | cg20783319 | NCAM1;NCA    | 11 | 0.00324083 | 0.504609299 |
| -0.1377825 | cg01906055 | NCAPH        | 2  | 0.04408104 | 0.801940434 |
| -0.1007825 | cg03147185 | NCAPH        | 2  | 0.00066893 | 0.564109192 |
| -0.1225284 | cg02532700 | NCF4;NCF4    | 22 | 0.01848155 | 0.68280635  |
| -0.1205534 | cg09785516 | NCKAP5;NCK   | 2  | 0.0189528  | 0.450356875 |
| -0.1141596 | cg16328548 | NCKAP5;NCK   | 2  | 0.04480959 | 0.710574092 |
| -0.164959  | cg14416623 | NCKAP5;NCK   | 2  | 0.00646227 | 0.507774593 |
| -0.1285349 | cg12131620 | NCLN         | 19 | 0.03911232 | 0.789889189 |
| -0.1926215 | cg10743062 | NCOA6        | 20 | 0.0082445  | 0.469079403 |
| -0.187828  | cg25954028 | NCOR2;NCOF   | 12 | 0.00136988 | 0.710064188 |
| -0.1339163 | cg14550066 | NCR1;NCR1;f  | 19 | 0.03110814 | 0.398859541 |
| -0.1542061 | cg12123879 | NCR1;NCR1;f  | 19 | 0.03443779 | 0.420313458 |
| -0.1279361 | cg25990402 | NCR2         | 6  | 0.02398897 | 0.609169695 |
| -0.1247823 | cg23484380 | NCR3;NCR3;f  | 6  | 0.00091139 | 0.372031217 |
| -0.1633983 | cg08610982 | NCR3;NCR3;f  | 6  | 0.00067267 | 0.446843582 |
| -0.1183485 | cg13910377 | NCRNA00111   | 21 | 0.00521727 | 0.642569176 |
| -0.1061974 | cg06804705 | NCRNA00114   | 21 | 0.04862525 | 0.720882835 |
| -0.1085632 | cg09758842 | NCRNA00164   | 2  | 0.03453517 | 0.815609889 |
| -0.1287639 | cg24479752 | NCRNA00171   | 6  | 0.02573555 | 0.352634679 |
| -0.145418  | cg07235935 | NDST4        | 4  | 0.0316473  | 0.625351199 |
| -0.1053439 | cg13897914 | NDUFAF1      | 15 | 0.00891627 | 0.755602917 |
| -0.1006268 | cg04436964 | NDUFS2;ADA   | 1  | 0.02079842 | 0.583511979 |
| -0.1025495 | cg08850169 | NDUFS2;NDL   | 1  | 0.04634162 | 0.391416891 |
| -0.1598478 | cg12070987 | NDUFS8       | 11 | 0.01067648 | 0.848772709 |
| -0.2686865 | cg08580187 | NECAB2       | 16 | 0.00174397 | 0.678874091 |
| -0.1431551 | cg20389653 | NECAP2;NEC   | 1  | 0.02631314 | 0.704695781 |
| -0.1095784 | cg01085803 | NEDD9;NEDI   | 6  | 0.02996291 | 0.605326168 |
| -0.1190494 | cg13822256 | NEFL         | 8  | 0.00211167 | 0.598165963 |
| -0.1105932 | cg13008174 | NEIL2;NEIL2; | 8  | 0.00990569 | 0.50172647  |
| -0.1534536 | cg18615369 | NEK5         | 13 | 0.00303084 | 0.867884734 |
| -0.1399381 | cg11924499 | NELL1;NELL1  | 11 | 0.00033097 | 0.26577173  |



|            |            |             |    |            |             |
|------------|------------|-------------|----|------------|-------------|
| -0.1796876 | cg17280514 | NEU4;NEU4;I | 2  | 0.02825258 | 0.589593499 |
| -0.1600198 | cg00351443 | NEURL       | 10 | 0.01719864 | 0.736313792 |
| -0.1275737 | cg18636003 | NEURL       | 10 | 0.01949418 | 0.683255606 |
| -0.1298015 | cg20806345 | NEUROD1     | 2  | 0.00068434 | 0.360217042 |
| -0.1986788 | cg05109049 | NF1;EVI2B;N | 17 | 0.01814154 | 0.742291914 |
| -0.1565678 | cg10186605 | NF1;NF1     | 17 | 0.04724666 | 0.691532044 |
| -0.1446215 | cg21964564 | NFASC;NFAS  | 1  | 0.0029888  | 0.334471527 |
| -0.1403985 | cg08915824 | NFASC;NFAS  | 1  | 0.00599587 | 0.650714725 |
| -0.1289103 | cg09465142 | NFATC2;NFA  | 20 | 0.00361689 | 0.449310968 |
| -0.1210196 | cg11074047 | NFATC2;NFA  | 20 | 0.04893011 | 0.733391775 |
| -0.1171275 | cg02506867 | NFATC3;NFA  | 16 | 0.00477324 | 0.281634393 |
| -0.107936  | cg04158018 | NFE2        | 12 | 0.04883066 | 0.647735575 |
| -0.1024255 | cg27050612 | NFE2L1      | 17 | 0.00610611 | 0.394558879 |
| -0.185611  | cg10536999 | NFE2L3      | 7  | 0.00196617 | 0.268793089 |
| -0.1547732 | cg12510708 | NFE2L3      | 7  | 0.00320593 | 0.641396417 |
| -0.1033715 | cg02106072 | NFIL3       | 9  | 0.0322584  | 0.661051934 |
| -0.1585572 | cg11087503 | NID2        | 14 | 0.02651006 | 0.726820288 |
| -0.1991325 | cg22767754 | NIPAL1      | 4  | 0.00281083 | 0.799498393 |
| -0.1400348 | cg24575128 | NISCH       | 3  | 0.02142099 | 0.477070145 |
| -0.1502075 | cg03226666 | NKAIN2      | 6  | 0.00528225 | 0.466678972 |
| -0.1379262 | cg12300018 | NKAIN3      | 8  | 0.00394696 | 0.659287071 |
| -0.1055308 | cg03064228 | NKD1        | 16 | 0.04770003 | 0.871467206 |
| -0.1060777 | cg01701634 | NKG7        | 19 | 0.00045549 | 0.345600796 |
| -0.1219411 | cg06874016 | NKIRAS2;NKI | 17 | 0.00057702 | 0.297747897 |
| -0.1428932 | cg18017926 | NKX2-5;NKX2 | 5  | 0.00812373 | 0.410275058 |
| -0.2757505 | cg01040654 | NKX2-5;NKX2 | 5  | 0.01050906 | 0.670250206 |
| -0.2619466 | cg07383092 | NKX2-5;NKX2 | 5  | 0.00380489 | 0.446356011 |
| -0.2191312 | cg11330740 | NKX2-5;NKX2 | 5  | 0.011162   | 0.55490578  |
| -0.1210269 | cg07937271 | NKX3-2      | 4  | 0.0381314  | 0.819093936 |
| -0.1142994 | cg24275315 | NKX6-1      | 4  | 0.0027045  | 0.28183124  |
| -0.1155315 | cg24845848 | NKX6-1      | 4  | 0.01231468 | 0.326068427 |
| -0.2225874 | cg06374325 | NKX6-1      | 4  | 0.00961385 | 0.53610057  |
| -0.2366016 | cg25830182 | NKX6-1      | 4  | 0.00014332 | 0.321784508 |
| -0.1295018 | cg22598426 | NKX6-1      | 4  | 0.00072228 | 0.400408521 |
| -0.1186327 | cg27406678 | NKX6-1      | 4  | 0.00278276 | 0.411999098 |
| -0.1747818 | cg22256677 | NKX6-1      | 4  | 0.0001501  | 0.395536367 |
| -0.1245677 | cg18297736 | NKX6-1      | 4  | 0.00090161 | 0.396840956 |
| -0.121129  | cg02489958 | NKX6-1      | 4  | 0.00123056 | 0.458645875 |
| -0.125441  | cg15704699 | NLK         | 17 | 0.0003828  | 0.329488399 |
| -0.2052158 | cg03065612 | NLRC3       | 16 | 0.04354201 | 0.746153605 |
| -0.1710623 | cg22171142 | NLRC3       | 16 | 0.018388   | 0.630475629 |
| -0.1488234 | cg08213607 | NLRC3;NLRC  | 16 | 0.0065039  | 0.593352956 |
| -0.135197  | cg26561413 | NLRP1;NLRP  | 17 | 0.02126899 | 0.267177965 |
| -0.1246645 | cg07042144 | NLRP12      | 19 | 0.00283677 | 0.755398999 |
| -0.1210415 | cg22337438 | NLRP12;NLR  | 19 | 0.02011424 | 0.812439062 |
| -0.1123667 | cg24307499 | NLRP2       | 19 | 0.00434532 | 0.74230499  |

|            |            |               |    |            |             |
|------------|------------|---------------|----|------------|-------------|
| -0.1245167 | cg21806273 | NLRP3;NLRP3   | 1  | 0.02921793 | 0.33224236  |
| -0.1182347 | cg03505654 | NLRP3;NLRP3   | 1  | 0.02025072 | 0.675351889 |
| -0.1045109 | cg21919599 | NLRP3;NLRP3   | 1  | 0.00639635 | 0.507950708 |
| -0.1859391 | cg26112639 | NLRP3;NLRP3   | 1  | 0.01470547 | 0.517215374 |
| -0.1620473 | cg14928510 | NLRP7;NLRP7   | 19 | 0.01970565 | 0.820296376 |
| -0.1212996 | cg15977933 | NMNAT2        | 1  | 0.01747975 | 0.63729531  |
| -0.1402162 | cg13101705 | NMNAT2;NMNAT2 | 1  | 0.00311208 | 0.494539775 |
| -0.1322002 | cg07429087 | NMUR2         | 5  | 0.00959382 | 0.659284874 |
| -0.1136671 | cg02326551 | NOC2L         | 1  | 0.03980191 | 0.778722094 |
| -0.1247806 | cg19071544 | NOD1          | 7  | 0.02459096 | 0.774429987 |
| -0.1457448 | cg04172533 | NOD2          | 16 | 0.04834728 | 0.82126786  |
| -0.1336893 | cg01243823 | NOD2          | 16 | 0.00894023 | 0.40147116  |
| -0.1131    | cg21179618 | NOTCH1        | 9  | 0.02732343 | 0.708925771 |
| -0.114124  | cg03250947 | NOTCH4        | 6  | 0.02190421 | 0.639135901 |
| -0.1060052 | cg05797854 | NOX3          | 6  | 0.00707481 | 0.653209948 |
| -0.1411974 | cg06979108 | NOX4          | 11 | 0.02637196 | 0.582065116 |
| -0.1237993 | cg09819656 | NPAS3;NPAS3   | 14 | 0.03071555 | 0.441320509 |
| -0.1009024 | cg06850660 | NPFF          | 12 | 0.00110622 | 0.346083773 |
| -0.1142949 | cg03017946 | NPFFR2        | 4  | 0.0435871  | 0.680973525 |
| -0.1827846 | cg12986700 | NPFFR2;NPFFR2 | 4  | 0.00455752 | 0.321545526 |
| -0.2373495 | cg13202952 | NPM2          | 8  | 0.03887061 | 0.693401381 |
| -0.2132113 | cg18418051 | NPR3          | 5  | 0.02091932 | 0.851559423 |
| -0.1423658 | cg26647771 | NPR3          | 5  | 0.0365009  | 0.564114865 |
| -0.1689005 | cg01335126 | NPW           | 16 | 0.00086501 | 0.457292431 |
| -0.1637856 | cg21556967 | NPY2R         | 4  | 0.00225347 | 0.640451793 |
| -0.2193365 | cg09636661 | NQO1;NQO1     | 16 | 0.01786297 | 0.294738752 |
| -0.1735492 | cg09244872 | NR1H4         | 12 | 0.00147742 | 0.566272007 |
| -0.135371  | cg08946601 | NR2E1         | 6  | 0.0071726  | 0.456447205 |
| -0.1349805 | cg08969950 | NR2F1         | 5  | 0.00184752 | 0.617236963 |
| -0.1202094 | cg23734137 | NR2F2         | 15 | 0.01659012 | 0.735123484 |
| -0.1580573 | cg05108467 | NR2F2         | 15 | 0.00385022 | 0.212703942 |
| -0.1088137 | cg26593946 | NR2F2         | 15 | 0.00215987 | 0.322427234 |
| -0.1696877 | cg01213447 | NR2F2         | 15 | 0.00010789 | 0.631082195 |
| -0.1637987 | cg20754348 | NR2F2;NR2F2   | 15 | 0.00042068 | 0.323464959 |
| -0.1093227 | cg27236629 | NR2F2;NR2F2   | 15 | 8.25E-05   | 0.646201339 |
| -0.1083186 | cg02964555 | NR4A2         | 2  | 0.02531505 | 0.518014405 |
| -0.209831  | cg20570611 | NR4A2         | 2  | 0.04181434 | 0.627199236 |
| -0.1081119 | cg06101180 | NR4A2         | 2  | 0.02597005 | 0.705954656 |
| -0.1044179 | cg03277560 | NR4A3;NR4A3   | 9  | 0.03894279 | 0.744526411 |
| -0.1112138 | cg04308769 | NR5A2;NR5A2   | 1  | 0.03858042 | 0.361087506 |
| -0.1272521 | cg14046477 | NR6A1;NR6A1   | 9  | 0.0202865  | 0.416727436 |
| -0.1268033 | cg27133711 | NRG1          | 8  | 0.00262792 | 0.552511767 |
| -0.1390179 | cg20127899 | NRG1;NRG1     | 8  | 0.00179349 | 0.319679178 |
| -0.1047011 | cg17519477 | NRG3;NRG3     | 10 | 0.02436881 | 0.680185907 |
| -0.1416354 | cg06850159 | NRG3;NRG3     | 10 | 0.00167974 | 0.498057554 |
| -0.1157964 | cg21770330 | NRGN;NRGN     | 11 | 0.00681624 | 0.383779088 |

|            |            |             |    |            |             |
|------------|------------|-------------|----|------------|-------------|
| -0.1666369 | cg07543138 | NRIP1       | 21 | 0.04567426 | 0.761313336 |
| -0.1599203 | cg01493727 | NRN1        | 6  | 0.03464726 | 0.490044663 |
| -0.158384  | cg05265020 | NRN1        | 6  | 0.02657117 | 0.469853872 |
| -0.1416325 | cg27270412 | NRP1;NRP1;N | 10 | 0.03574853 | 0.83153828  |
| -0.1365037 | cg05264870 | NRP2;NRP2;N | 2  | 0.00827128 | 0.894320829 |
| -0.107745  | cg19731541 | NRP2;NRP2;N | 2  | 0.00121556 | 0.660119565 |
| -0.1031217 | cg09271709 | NRXN1;NRXN  | 2  | 0.01690968 | 0.792580461 |
| -0.1280259 | cg10917619 | NRXN1;NRXN  | 2  | 0.01055555 | 0.692281887 |
| -0.1576465 | cg08623810 | NRXN2;NRXN  | 11 | 0.00949339 | 0.638481577 |
| -0.1348725 | cg10991579 | NRXN3       | 14 | 0.02092655 | 0.326727491 |
| -0.1307081 | cg14185201 | NRXN3       | 14 | 0.00024762 | 0.336481537 |
| -0.1284385 | cg27379887 | NSFL1C;NSFL | 20 | 0.03008269 | 0.550787673 |
| -0.2071308 | cg10037913 | NSMCE1      | 16 | 0.00284481 | 0.641924275 |
| -0.1313805 | cg16396933 | NT5C2;NT5C  | 10 | 0.04100489 | 0.555791169 |
| -0.119445  | cg06004033 | NT5DC3      | 12 | 0.00049158 | 0.418728873 |
| -0.2181453 | cg26567736 | NTM         | 11 | 0.00093428 | 0.440575588 |
| -0.1778804 | cg12445309 | NTM         | 11 | 0.00685393 | 0.489053041 |
| -0.1797168 | cg16763885 | NTM;NTM;N   | 11 | 0.00259933 | 0.2638476   |
| -0.223271  | cg15370309 | NTN1        | 17 | 0.04354033 | 0.527428425 |
| -0.2022763 | cg13620631 | NTRK2;NTRK  | 9  | 0.02514493 | 0.58409949  |
| -0.1901402 | cg25699759 | NTRK3;NTRK  | 15 | 0.01227972 | 0.794022616 |
| -0.1715532 | cg03287527 | NUBP1       | 16 | 0.0214763  | 0.682100332 |
| -0.1481849 | cg05450979 | NUBP1       | 16 | 0.04977705 | 0.791932107 |
| -0.1251403 | cg17467898 | NUDT1;NUDT  | 7  | 0.00266472 | 0.496558392 |
| -0.1196292 | cg14530679 | NUDT9;NUDT  | 4  | 0.01662398 | 0.472599959 |
| -0.1676189 | cg23878206 | NUP62;ATF5; | 19 | 0.01684484 | 0.866593359 |
| -0.192429  | cg10776186 | NUPL1;NUPL  | 13 | 0.00879167 | 0.534116904 |
| -0.2955922 | cg08496737 | NXF1;NXF1   | 11 | 0.00419631 | 0.449942697 |
| -0.1507263 | cg25505880 | NXF1;NXF1   | 11 | 0.0227269  | 0.565187329 |
| -0.1092323 | cg25364619 | NXN         | 17 | 0.01426205 | 0.708635015 |
| -0.2164132 | cg17334536 | NXN         | 17 | 0.01103577 | 0.586190941 |
| -0.1481192 | cg21971800 | NXN         | 17 | 0.01561989 | 0.483318581 |
| -0.1456583 | cg22237425 | NXN         | 17 | 0.04423046 | 0.563142534 |
| -0.131985  | cg08510234 | NXN         | 17 | 0.00180682 | 0.777228762 |
| -0.1270504 | cg13383734 | NXN         | 17 | 0.00139778 | 0.841306103 |
| -0.1108979 | cg09225457 | NXPH1       | 7  | 0.0226765  | 0.239516598 |
| -0.1077194 | cg03836586 | NXPH1       | 7  | 0.0054285  | 0.245897498 |
| -0.1074246 | cg12502577 | NXPH4       | 12 | 0.02510132 | 0.622456487 |
| -0.105668  | cg19789466 | OAS1;OAS1;C | 12 | 0.03525619 | 0.764407081 |
| -0.1010952 | cg04708790 | OAS1;OAS1;C | 12 | 0.00362546 | 0.641577477 |
| -0.176471  | cg19371652 | OAS2;OAS2;C | 12 | 0.00586897 | 0.692929754 |
| -0.1448223 | cg20870559 | OAS2;OAS2;C | 12 | 0.00026193 | 0.387676858 |
| -0.1138299 | cg16399664 | OAS2;OAS2;C | 12 | 0.00319263 | 0.52708321  |
| -0.1050643 | cg27147785 | OAS2;OAS2;C | 12 | 0.00046636 | 0.327832228 |
| -0.1028631 | cg12560128 | OAS2;OAS2;C | 12 | 0.00238262 | 0.654430356 |
| -0.1391515 | cg06800840 | OASL;OASL   | 12 | 0.02990814 | 0.56439544  |

|            |            |             |    |            |             |
|------------|------------|-------------|----|------------|-------------|
| -0.1007805 | cg05048523 | OBSCN;OBSC  | 1  | 0.00765563 | 0.851740508 |
| -0.1002832 | cg03419458 | OBSCN;OBSC  | 1  | 0.01389537 | 0.715589479 |
| -0.1154777 | cg25626375 | OC90        | 8  | 0.00335228 | 0.732654144 |
| -0.1212381 | cg15399926 | OCA2        | 15 | 0.03127798 | 0.762904809 |
| -0.1036817 | cg24943998 | OCA2        | 15 | 0.00167449 | 0.572548947 |
| -0.2404823 | cg00366359 | ODZ4        | 11 | 0.04798515 | 0.493043615 |
| -0.1542606 | cg09966895 | ODZ4        | 11 | 0.00039188 | 0.365711511 |
| -0.1048315 | cg02581615 | OLAH;OLAH   | 10 | 0.03250083 | 0.860077792 |
| -0.1903081 | cg22557711 | OLFM2       | 19 | 0.02455499 | 0.766675635 |
| -0.1792233 | cg04846232 | OLFM3       | 1  | 0.00028659 | 0.262829717 |
| -0.1749068 | cg11983942 | OPCML       | 11 | 0.00308862 | 0.578655992 |
| -0.1515324 | cg18989085 | OPCML       | 11 | 0.00103416 | 0.768272276 |
| -0.1325331 | cg25585185 | OPCML       | 11 | 0.00455028 | 0.786011981 |
| -0.1318862 | cg01875106 | OPCML;OPC   | 11 | 0.00440889 | 0.427526278 |
| -0.1076291 | cg17786206 | OPRD1       | 1  | 3.77E-05   | 0.380044025 |
| -0.1557729 | cg22794244 | OR10G9      | 11 | 0.03033752 | 0.814700392 |
| -0.1125231 | cg25843439 | OR10H3      | 19 | 0.03941537 | 0.486175141 |
| -0.1705354 | cg10278025 | OR12D3      | 6  | 0.00695241 | 0.522444655 |
| -0.1643173 | cg03019219 | OR14J1      | 6  | 0.00147192 | 0.450816429 |
| -0.1619844 | cg03529662 | OR1A1       | 17 | 0.03095347 | 0.363287978 |
| -0.1535847 | cg14314889 | OR1E2       | 17 | 0.01077128 | 0.355636726 |
| -0.1438382 | cg03208902 | OR1F2P      | 16 | 0.00138739 | 0.554017864 |
| -0.1401902 | cg16343924 | OR2H1       | 6  | 0.00085184 | 0.591739638 |
| -0.1212262 | cg11246007 | OR2H2       | 6  | 0.0097915  | 0.634410152 |
| -0.1130074 | cg05009707 | OR2H2       | 6  | 0.00232324 | 0.468754397 |
| -0.1036181 | cg22490229 | OR2M2       | 1  | 0.02818997 | 0.484228831 |
| -0.1006427 | cg07483650 | OR2T4       | 1  | 0.01280183 | 0.586390184 |
| -0.105064  | cg15690511 | OR4C12      | 11 | 0.00931215 | 0.46419451  |
| -0.1323733 | cg05282518 | OR4K2       | 14 | 0.00092799 | 0.403446413 |
| -0.1204955 | cg25798460 | OR56A5      | 11 | 5.02E-05   | 0.328129468 |
| -0.1938251 | cg00849025 | OR5B3       | 11 | 0.03335052 | 0.526376903 |
| -0.1086441 | cg21052687 | OR5D14      | 11 | 0.00481564 | 0.564639995 |
| -0.2272675 | cg12750151 | OR5D18      | 11 | 0.00060628 | 0.517265937 |
| -0.185805  | cg19474983 | OR5H1       | 3  | 0.04859549 | 0.68430301  |
| -0.1451216 | cg18157275 | OR5M10;OR   | 11 | 0.0052888  | 0.552268336 |
| -0.123077  | cg10906826 | OR6B3       | 2  | 0.00676378 | 0.494948756 |
| -0.1156139 | cg19364530 | OR6F1       | 1  | 0.00081993 | 0.425300909 |
| -0.1133413 | cg20778958 | OR6P1       | 1  | 0.00348444 | 0.602409986 |
| -0.1121381 | cg13041637 | OR6X1       | 11 | 0.02905736 | 0.756667914 |
| -0.1113949 | cg24360034 | OR8B12      | 11 | 0.04479976 | 0.773888599 |
| -0.1101066 | cg04948906 | OR8B12      | 11 | 0.00479413 | 0.733389557 |
| -0.2019162 | cg12453675 | OR8G1       | 11 | 0.00116429 | 0.228100121 |
| -0.1310039 | cg27191606 | OR8H2       | 11 | 0.00693415 | 0.404537521 |
| -0.205516  | cg20886721 | OR8U8       | 11 | 0.00884603 | 0.494428513 |
| -0.203394  | cg11052535 | OR8U8;OR9C  | 11 | 0.00037224 | 0.268370371 |
| -0.1016373 | cg12011522 | OSBPL6;OSBI | 2  | 0.005996   | 0.448429778 |

|            |            |             |    |            |             |
|------------|------------|-------------|----|------------|-------------|
| -0.1149771 | cg02026204 | OSM         | 22 | 0.01878247 | 0.782825751 |
| -0.1001431 | cg07498879 | OSM         | 22 | 0.02883509 | 0.63820225  |
| -0.1743692 | cg05539509 | OSM         | 22 | 0.00212219 | 0.575111245 |
| -0.1296874 | cg00017461 | OSM         | 22 | 0.00179658 | 0.784987311 |
| -0.1463424 | cg12925682 | OSMR;OSMR   | 5  | 0.02167367 | 0.82595514  |
| -0.1819651 | cg12619940 | OSR1        | 2  | 0.01558075 | 0.708226881 |
| -0.1467607 | cg11943209 | OSR1        | 2  | 0.02691341 | 0.581251354 |
| -0.1005864 | cg20707692 | OSR1        | 2  | 0.04927937 | 0.577385233 |
| -0.1145529 | cg26701390 | OSR1        | 2  | 0.00997231 | 0.746391677 |
| -0.1493924 | cg22478121 | OSR1        | 2  | 0.000497   | 0.40465991  |
| -0.1145107 | cg02172492 | OSR1        | 2  | 0.00267798 | 0.782881504 |
| -0.1197866 | cg27305303 | OTOF        | 2  | 0.01220713 | 0.794062255 |
| -0.1126334 | cg20687940 | OTUB1;OTUE  | 11 | 0.00071736 | 0.39776751  |
| -0.1237449 | cg10465028 | OTUB1;OTUE  | 11 | 0.00602583 | 0.438793202 |
| -0.1223838 | cg01882774 | OTUB2       | 14 | 0.01678532 | 0.757774747 |
| -0.2037676 | cg15026634 | OTX1        | 2  | 0.04775755 | 0.758427561 |
| -0.163772  | cg16595607 | OTX1        | 2  | 0.01811247 | 0.833734875 |
| -0.1561666 | cg04276301 | OTX1        | 2  | 0.01379461 | 0.662427106 |
| -0.1222676 | cg04793268 | OVCH2       | 11 | 0.00275563 | 0.507179142 |
| -0.1710608 | cg13820899 | OXER1;OXER  | 2  | 0.02321912 | 0.653632455 |
| -0.1485976 | cg07005444 | P2RX1       | 17 | 0.00478025 | 0.474421213 |
| -0.2119205 | cg00277342 | P2RY6;P2RY6 | 11 | 0.01775745 | 0.829770009 |
| -0.1897445 | cg15745401 | P2RY6;P2RY6 | 11 | 0.00320667 | 0.595194736 |
| -0.1436936 | cg22702351 | PACRG;PACR  | 6  | 0.03954097 | 0.415722725 |
| -0.140497  | cg02652891 | PACRG;PACR  | 6  | 0.02284661 | 0.436388669 |
| -0.1081433 | cg07100542 | PADI2       | 1  | 0.03172625 | 0.704673935 |
| -0.1022968 | cg00569276 | PADI2       | 1  | 0.01847169 | 0.620661642 |
| -0.195788  | cg00025357 | PADI3       | 1  | 0.00846539 | 0.260666491 |
| -0.154968  | cg03513388 | PADI3       | 1  | 0.01818872 | 0.42597057  |
| -0.1466632 | cg08277548 | PADI3       | 1  | 0.01287614 | 0.323380683 |
| -0.1365792 | cg14561834 | PADI4       | 1  | 0.00418179 | 0.491480312 |
| -0.1651782 | cg23228178 | PADI4       | 1  | 0.01207711 | 0.530806742 |
| -0.1795072 | cg16091981 | PADI4       | 1  | 0.0020756  | 0.459025565 |
| -0.1277945 | cg00665650 | PAIP2;PAIP2 | 5  | 0.01374562 | 0.455224058 |
| -0.1032738 | cg13866253 | PAK1;PAK1   | 11 | 0.0015398  | 0.891750927 |
| -0.1160776 | cg03822639 | PALLD;PALLD | 4  | 0.04986146 | 0.81541645  |
| -0.213064  | cg08947774 | PALLD;PALLD | 4  | 0.01512611 | 0.752250633 |
| -0.1879276 | cg05259872 | PALLD;PALLD | 4  | 0.00751999 | 0.814321714 |
| -0.1872598 | cg01481116 | PANX1       | 11 | 0.00118529 | 0.337893758 |
| -0.1629992 | cg24101009 | PANX1       | 11 | 0.02413983 | 0.562049275 |
| -0.102983  | cg04438229 | PANX2;PANX  | 22 | 0.01446362 | 0.503290353 |
| -0.136637  | cg00860359 | PANX2;PANX  | 22 | 0.04449296 | 0.5964646   |
| -0.1263713 | cg10902549 | PAOX;PAOX;l | 10 | 0.01227812 | 0.857625375 |
| -0.1434248 | cg03319315 | PAOX;PAOX;l | 10 | 0.01310841 | 0.716605189 |
| -0.1007703 | cg18563886 | PAOX;PAOX;l | 10 | 0.00823773 | 0.647258396 |
| -0.1281403 | cg00744494 | PAPLN       | 14 | 0.00604568 | 0.691225996 |

|            |            |              |    |            |             |
|------------|------------|--------------|----|------------|-------------|
| -0.1744897 | cg14094498 | PAPPA        | 9  | 0.00088054 | 0.736153296 |
| -0.1388891 | cg04983296 | PAQR3        | 4  | 0.0364316  | 0.380229701 |
| -0.1416648 | cg10447404 | PARD3        | 10 | 0.03613261 | 0.46388931  |
| -0.1248034 | cg19017553 | PARD3        | 10 | 0.0364448  | 0.788020962 |
| -0.1322742 | cg06271128 | PARD3        | 10 | 0.00217667 | 0.317494211 |
| -0.1265156 | cg08623277 | PARD3B;PAR   | 2  | 0.02523983 | 0.72713744  |
| -0.1328109 | cg02926266 | PARD3B;PAR   | 2  | 0.04000988 | 0.639026135 |
| -0.1048809 | cg23270841 | PARD3B;PAR   | 2  | 0.00815058 | 0.624524328 |
| -0.163437  | cg08346632 | PARK2;PARK   | 6  | 0.00414225 | 0.314677807 |
| -0.147886  | cg01948202 | PARP14       | 3  | 0.02297678 | 0.633587626 |
| -0.1280429 | cg02346790 | PARP15       | 3  | 0.00262199 | 0.546239854 |
| -0.1157763 | cg20765408 | PARP4        | 13 | 0.0021702  | 0.324872307 |
| -0.1118964 | cg04134965 | PARVB;PARV   | 22 | 0.00463688 | 0.804454499 |
| -0.1086206 | cg19460508 | PARVB;PARV   | 22 | 0.00074104 | 0.750107351 |
| -0.1336702 | cg08271031 | PARVG;PARV   | 22 | 0.00761185 | 0.667250484 |
| -0.1350811 | cg19653345 | PARVG;PARV   | 22 | 0.04790952 | 0.370316998 |
| -0.1089276 | cg05014660 | PARVG;PARV   | 22 | 0.00332983 | 0.412512957 |
| -0.1675932 | cg02827046 | PATE2        | 11 | 0.00604081 | 0.508718839 |
| -0.160128  | cg20737028 | PATE3        | 11 | 0.04795017 | 0.530078493 |
| -0.1177933 | cg09752271 | PATE3;PATE3  | 11 | 0.02339674 | 0.777693717 |
| -0.226362  | cg11163555 | PATZ1;PATZ1  | 22 | 0.0164558  | 0.303314278 |
| -0.156154  | cg11490745 | PAX3;PAX3;P  | 2  | 0.02395463 | 0.716876776 |
| -0.1132322 | cg18170071 | PAX4         | 7  | 0.00089849 | 0.269986386 |
| -0.1006721 | cg00318543 | PAX5         | 9  | 0.02748403 | 0.761479769 |
| -0.1278719 | cg09791440 | PAX7;PAX7;P  | 1  | 0.00113329 | 0.374541491 |
| -0.1046594 | cg20735988 | PBLD;PBLD    | 10 | 0.01238904 | 0.318494783 |
| -0.2166954 | cg26558862 | PBRM1;PBRM   | 3  | 0.0100674  | 0.727131795 |
| -0.1970195 | cg21853707 | PBX1         | 1  | 0.02001956 | 0.710430424 |
| -0.1683005 | cg14031054 | PBX1         | 1  | 0.00492484 | 0.619942694 |
| -0.1675977 | cg20765522 | PBX2         | 6  | 0.01249204 | 0.565834422 |
| -0.1377731 | cg12660777 | PBX2         | 6  | 0.02455499 | 0.492024678 |
| -0.1317427 | cg10738025 | PBX4         | 19 | 0.02334082 | 0.495524483 |
| -0.11889   | cg27149567 | PCBP3;PCBP3  | 21 | 0.03665404 | 0.497587638 |
| -0.1051067 | cg27329559 | PCDH15;PCD   | 10 | 0.01698219 | 0.556644828 |
| -0.1619223 | cg15901722 | PCDH24       | 5  | 0.0079548  | 0.258758812 |
| -0.1331754 | cg14369318 | PCDH7        | 4  | 0.01867143 | 0.620131073 |
| -0.1163663 | cg05431842 | PCDH7;PCDH   | 4  | 0.00596766 | 0.428375308 |
| -0.1217508 | cg10707081 | PCDH9;PCDH   | 13 | 0.00086257 | 0.598873286 |
| -0.1601433 | cg25487047 | PCDHA9;PCD   | 5  | 0.01891991 | 0.437430551 |
| -0.1585085 | cg11014124 | PCDHGA4;PC   | 5  | 0.02251805 | 0.181270803 |
| -0.2267696 | cg16578636 | PCGF5        | 10 | 0.01816087 | 0.661257143 |
| -0.1060745 | cg14205864 | PCID2;PCID2; | 13 | 0.01726233 | 0.6843212   |
| -0.1390202 | cg09378756 | PCK2;PCK2    | 14 | 0.03285513 | 0.436750755 |
| -0.1546134 | cg01966277 | PCLO         | 7  | 0.0050621  | 0.608191531 |
| -0.1255831 | cg21234538 | PCNT         | 21 | 0.01915508 | 0.891186036 |
| -0.1922511 | cg20737505 | PCSK2        | 20 | 0.00459977 | 0.625739315 |

|            |            |              |    |            |             |
|------------|------------|--------------|----|------------|-------------|
| -0.1094009 | cg07869023 | PCSK2        | 20 | 0.00224132 | 0.686756188 |
| -0.2240038 | cg14453145 | PDCD1        | 2  | 0.01070704 | 0.526410105 |
| -0.1447971 | cg25954134 | PDE11A       | 2  | 0.02801366 | 0.782617068 |
| -0.1196222 | cg05148373 | PDE1A;PDE1   | 2  | 0.00543161 | 0.285762957 |
| -0.2058365 | cg24752644 | PDE4D;PDE4   | 5  | 0.01306633 | 0.708225196 |
| -0.1007621 | cg23933216 | PDE4DIP      | 1  | 0.0096033  | 0.425198561 |
| -0.1211873 | cg17457379 | PDE4DIP      | 1  | 0.01811511 | 0.665616613 |
| -0.1327089 | cg10505902 | PDE4DIP;PDE  | 1  | 0.02461899 | 0.708186492 |
| -0.1412452 | cg11164441 | PDE6B;PDE6I  | 4  | 0.00186103 | 0.802838144 |
| -0.1264588 | cg12546582 | PDE7B        | 6  | 0.04552382 | 0.821929396 |
| -0.1112765 | cg10706013 | PDE9A;PDE9   | 21 | 0.0224438  | 0.414363601 |
| -0.1010969 | cg16375048 | PDGFC        | 4  | 0.03992895 | 0.711568104 |
| -0.1053928 | cg18688704 | PDGFC        | 4  | 0.0307719  | 0.422877441 |
| -0.1219069 | cg03020863 | PDGFD;PDGF   | 11 | 0.00137659 | 0.602735761 |
| -0.1134463 | cg21363050 | PDGFRA       | 4  | 0.04206319 | 0.386327973 |
| -0.1310387 | cg18214661 | PDGFRL       | 8  | 0.01263836 | 0.367516124 |
| -0.1504231 | cg20449614 | PDLIM2;PDLI  | 8  | 0.0181855  | 0.780212894 |
| -0.114692  | cg25581330 | PDLIM3;PDLI  | 4  | 0.01642605 | 0.851291816 |
| -0.1053414 | cg02383173 | PDLIM5;PDLI  | 4  | 0.02059754 | 0.644149623 |
| -0.1010914 | cg01916632 | PDSS2        | 6  | 0.00449277 | 0.672594874 |
| -0.1830622 | cg22571544 | PDZD2        | 5  | 0.0236151  | 0.489958601 |
| -0.1805984 | cg20210051 | PDZRN4;PDZ   | 12 | 0.01257095 | 0.533262629 |
| -0.1298996 | cg04397884 | PELI2        | 14 | 0.01894087 | 0.313386459 |
| -0.1162484 | cg01208566 | PELI2        | 14 | 0.02218364 | 0.841252689 |
| -0.1154995 | cg08994060 | PFKFB3       | 10 | 0.00792222 | 0.743662594 |
| -0.1300047 | cg05014727 | PFKFB3       | 10 | 0.00693336 | 0.730613594 |
| -0.1208734 | cg26262157 | PFKFB3       | 10 | 0.00864106 | 0.712797437 |
| -0.1594676 | cg07859439 | PGAP1        | 2  | 0.00988003 | 0.833093414 |
| -0.2913379 | cg02956542 | PGLYRP4      | 1  | 0.01095849 | 0.408423358 |
| -0.145333  | cg10517290 | PGS1         | 17 | 0.0138302  | 0.710917839 |
| -0.1267435 | cg21216268 | PHC3         | 3  | 0.03039378 | 0.746758843 |
| -0.1055382 | cg20870752 | PHF14;PHF14  | 7  | 0.04028017 | 0.810422559 |
| -0.161548  | cg24667736 | PHLDB2;PHLI  | 3  | 0.03680111 | 0.646044025 |
| -0.1771114 | cg21328779 | PHLDB2;PHLI  | 3  | 9.60E-05   | 0.28174034  |
| -0.1149412 | cg26987660 | PHOX2A       | 11 | 0.00132119 | 0.371262375 |
| -0.2955275 | cg09802835 | PHOX2A       | 11 | 0.00154114 | 0.590025658 |
| -0.1193959 | cg02960777 | PHTF2;PHTF2  | 7  | 0.03232617 | 0.829935156 |
| -0.2199262 | cg09304624 | PI15         | 8  | 0.00499832 | 0.607757003 |
| -0.145481  | cg00961792 | PIGR         | 1  | 0.00159297 | 0.587243806 |
| -0.1418419 | cg21723559 | PIGT         | 20 | 0.03051672 | 0.764706262 |
| -0.1659192 | cg04287259 | PIK3CD       | 1  | 0.00293257 | 0.823333157 |
| -0.1176756 | cg07805542 | PIK3CD       | 1  | 0.03921308 | 0.330198198 |
| -0.1002041 | cg13214190 | PIK3CG       | 7  | 0.03083036 | 0.786564628 |
| -0.2047128 | cg00604356 | PIK3CG       | 7  | 0.0189422  | 0.389656151 |
| -0.1210669 | cg04610450 | PIK3R2       | 19 | 0.00266267 | 0.782336731 |
| -0.115361  | cg01008154 | PIK3R3;PIK3F | 1  | 0.04177856 | 0.709084001 |

|            |            |               |    |            |             |
|------------|------------|---------------|----|------------|-------------|
| -0.1398413 | cg01565508 | PIK3R5        | 17 | 0.03935309 | 0.688190288 |
| -0.1002156 | cg21971206 | PIK3R6        | 17 | 0.02039225 | 0.544531128 |
| -0.110809  | cg16268473 | PIK3R6        | 17 | 0.01901948 | 0.552733378 |
| -0.1721636 | cg08697847 | PIK3R6        | 17 | 0.0092796  | 0.517050027 |
| -0.1647049 | cg24092340 | PIK3R6;PIK3F  | 17 | 0.03034423 | 0.722002824 |
| -0.1552651 | cg09209669 | PIK3R6;PIK3F  | 17 | 0.00175762 | 0.472823102 |
| -0.1661347 | cg11969526 | PIKFYVE;PIKF  | 2  | 0.03687131 | 0.790330295 |
| -0.160048  | cg01768814 | PITPNC1;PITF  | 17 | 0.01541982 | 0.331918338 |
| -0.1116869 | cg05384139 | PITPNM2       | 12 | 0.01845749 | 0.634304772 |
| -0.1056203 | cg19370653 | PITX2;PITX2   | 4  | 0.00184551 | 0.233494339 |
| -0.2759898 | cg24005685 | PITX2;PITX2   | 4  | 0.00718386 | 0.264419213 |
| -0.2037493 | cg21299542 | PITX2;PITX2   | 4  | 0.00083256 | 0.248397587 |
| -0.1648648 | cg00692611 | PITX2;PITX2   | 4  | 0.00350523 | 0.241102376 |
| -0.1611835 | cg06842954 | PITX2;PITX2   | 4  | 0.00326092 | 0.617981731 |
| -0.1505449 | cg19829847 | PITX2;PITX2   | 4  | 0.00805027 | 0.673431654 |
| -0.1463504 | cg01951086 | PITX2;PITX2   | 4  | 0.00395086 | 0.442178607 |
| -0.1192898 | cg03943773 | PITX2;PITX2   | 4  | 0.00233838 | 0.348789716 |
| -0.1633782 | cg09781994 | PITX2;PITX2   | 4  | 0.0021646  | 0.528743461 |
| -0.1419057 | cg24925400 | PITX2;PITX2   | 4  | 0.00900911 | 0.407046842 |
| -0.1354228 | cg03184290 | PITX2;PITX2   | 4  | 0.00518363 | 0.511422032 |
| -0.1119586 | cg02725370 | PITX2;PITX2   | 4  | 0.00140385 | 0.420482955 |
| -0.1164194 | cg19304088 | PITX2;PITX2   | 4  | 5.08E-05   | 0.358879579 |
| -0.1333742 | cg26708319 | PITX2;PITX2   | 4  | 0.00123473 | 0.44759457  |
| -0.1886983 | cg26831119 | PITX2;PITX2   | 4  | 0.00444599 | 0.539272686 |
| -0.2276681 | cg09854515 | PITX2;PITX2   | 4  | 0.00450576 | 0.665575446 |
| -0.1688281 | cg13891220 | PITX2;PITX2   | 4  | 0.00128089 | 0.398253543 |
| -0.1433847 | cg05030680 | PITX2;PITX2;l | 4  | 0.01527162 | 0.451348134 |
| -0.1326881 | cg17507671 | PITX2;PITX2;l | 4  | 0.00509367 | 0.303509967 |
| -0.1021904 | cg13736376 | PITX2;PITX2;l | 4  | 0.00494834 | 0.312848927 |
| -0.1251709 | cg16184803 | PITX2;PITX2;l | 4  | 0.00431071 | 0.312273243 |
| -0.1621208 | cg13385016 | PITX2;PITX2;l | 4  | 0.04210046 | 0.674123442 |
| -0.1204798 | cg22717014 | PITX2;PITX2;l | 4  | 0.01635883 | 0.490934212 |
| -0.1471642 | cg03144922 | PITX2;PITX2;l | 4  | 0.00066504 | 0.739854453 |
| -0.1278632 | cg05835105 | PITX2;PITX2;l | 4  | 0.01350385 | 0.363921192 |
| -0.1170078 | cg08979895 | PITX2;PITX2;l | 4  | 0.01391913 | 0.528803433 |
| -0.1249672 | cg14308375 | PITX2;PITX2;l | 4  | 0.00297231 | 0.361155104 |
| -0.146012  | cg01371072 | PITX2;PITX2;l | 4  | 0.00168317 | 0.417031699 |
| -0.1361639 | cg10055501 | PITX2;PITX2;l | 4  | 0.00251006 | 0.704388349 |
| -0.1079135 | cg03972665 | PITX2;PITX2;l | 4  | 0.00067935 | 0.647814702 |
| -0.1066101 | cg21726372 | PITX2;PITX2;l | 4  | 0.00290093 | 0.674224864 |
| -0.1242467 | cg17929238 | PITX2;PITX2;l | 4  | 0.01022347 | 0.581946421 |
| -0.1813381 | cg20291436 | PITX2;PITX2;l | 4  | 0.00284739 | 0.482711369 |
| -0.173597  | cg22914729 | PITX2;PITX2;l | 4  | 0.0019814  | 0.507143791 |
| -0.1470063 | cg27398720 | PITX2;PITX2;l | 4  | 0.0004441  | 0.591749933 |
| -0.1406832 | cg03594078 | PIWIL2;PIWIL  | 8  | 0.03697697 | 0.776166323 |
| -0.1397378 | cg12858593 | PIWIL2;PIWIL  | 8  | 0.01459899 | 0.580708742 |



|            |            |              |    |            |             |
|------------|------------|--------------|----|------------|-------------|
| -0.1237086 | cg00163702 | PKD1L2;PKD1  | 16 | 0.00410441 | 0.782312252 |
| -0.1216796 | cg15490880 | PKLR;PKLR    | 1  | 0.01883048 | 0.790686937 |
| -0.1100122 | cg20468939 | PKN1;PKN1    | 19 | 0.04419105 | 0.698103548 |
| -0.1023773 | cg09270285 | PKNOX2       | 11 | 0.00381868 | 0.494631042 |
| -0.1004064 | cg09950681 | PKP3         | 11 | 0.01673457 | 0.720323702 |
| -0.1427122 | cg05048624 | PLA2G2D      | 1  | 0.04740403 | 0.604025043 |
| -0.1265134 | cg22193393 | PLA2G4E      | 15 | 0.02100575 | 0.637182844 |
| -0.1707421 | cg18981758 | PLA2G6;PLA2  | 22 | 0.04268525 | 0.699237017 |
| -0.1176817 | cg19255783 | PLAC8;PLAC8  | 4  | 0.04264638 | 0.618449805 |
| -0.1514771 | cg09920804 | PLAT;PLAT    | 8  | 0.01867932 | 0.710910164 |
| -0.1070815 | cg04084348 | PLAU;C10orf1 | 10 | 0.01586051 | 0.506480884 |
| -0.1020405 | cg14076977 | PLCB2        | 15 | 0.00101034 | 0.486836918 |
| -0.2081016 | cg05547778 | PLCB2        | 15 | 0.00023669 | 0.482977571 |
| -0.1663745 | cg21931938 | PLCB2        | 15 | 0.00010668 | 0.409007028 |
| -0.1100649 | cg05884705 | PLCB2;PLCB2  | 15 | 0.00320489 | 0.313950632 |
| -0.1006667 | cg24624873 | PLCE1;PLCE1  | 10 | 0.00412884 | 0.66287175  |
| -0.1968935 | cg11932158 | PLCH1        | 3  | 0.00628018 | 0.751917888 |
| -0.2453991 | cg26690511 | PLCH1        | 3  | 0.01554749 | 0.763363615 |
| -0.1172889 | cg18623216 | PLCH1;PLCH1  | 3  | 0.04679037 | 0.741949728 |
| -0.1244578 | cg16503724 | PLCL2;PLCL2  | 3  | 0.00220945 | 0.43187313  |
| -0.129377  | cg21535931 | PLEC1;PLEC1  | 8  | 0.02643209 | 0.755234601 |
| -0.1239064 | cg22258045 | PLEC1;PLEC1  | 8  | 0.01610428 | 0.734741035 |
| -0.1595021 | cg07531549 | PLEC1;PLEC1  | 8  | 0.03593957 | 0.745923338 |
| -0.1378689 | cg20784950 | PLEC1;PLEC1  | 8  | 0.03318956 | 0.618362896 |
| -0.1188918 | cg13060970 | PLEK;PLEK    | 2  | 0.00148459 | 0.653419756 |
| -0.1135818 | cg02861056 | PLEK;PLEK    | 2  | 0.00127589 | 0.639503622 |
| -0.1001906 | cg04872689 | PLEK;PLEK    | 2  | 0.00195431 | 0.656837993 |
| -0.2189211 | cg10812236 | PLEK;PLEK    | 2  | 0.00166427 | 0.685024317 |
| -0.1785934 | cg02556345 | PLEKHA1;PLE  | 10 | 0.02269625 | 0.579121815 |
| -0.1207383 | cg01073837 | PLEKHA2      | 8  | 0.0002684  | 0.456877802 |
| -0.1124258 | cg24339032 | PLEKHA6      | 1  | 0.0422978  | 0.695529871 |
| -0.1045427 | cg14945937 | PLEKHF1      | 19 | 0.02422573 | 0.53586347  |
| -0.1275568 | cg16540391 | PLEKHG1      | 6  | 0.02988717 | 0.461581439 |
| -0.1018013 | cg01767200 | PLEKHG4B     | 5  | 0.03498571 | 0.866974092 |
| -0.2114997 | cg01429933 | PLEKHG5;PLE  | 1  | 0.00345487 | 0.714217198 |
| -0.1976401 | cg07533239 | PLEKHG6;PLE  | 12 | 0.01132985 | 0.655307524 |
| -0.11642   | cg11524454 | PLEKHG7      | 12 | 0.00101428 | 0.580800871 |
| -0.1122468 | cg00186909 | PLEKHG7      | 12 | 0.00619271 | 0.749369848 |
| -0.2219993 | cg05939149 | PLEKHH2      | 2  | 0.03490096 | 0.836466319 |
| -0.1170469 | cg20105087 | PLTP;PLTP    | 20 | 0.00250268 | 0.679335663 |
| -0.1138383 | cg05652225 | PLXDC1       | 17 | 0.01275386 | 0.470855925 |
| -0.1014713 | cg02736746 | PLXNA2       | 1  | 0.0128584  | 0.506672652 |
| -0.1625714 | cg16850690 | PLXND1       | 3  | 0.01486949 | 0.757550983 |
| -0.1467075 | cg15213488 | PMCHL1;CDH   | 5  | 0.0014783  | 0.508507822 |
| -0.1461683 | cg01117384 | PMEPA1;PMI   | 20 | 0.0051787  | 0.438192444 |
| -0.1458381 | cg14422782 | PML;PML;PV   | 15 | 0.01561759 | 0.689244086 |

|            |            |             |    |            |             |
|------------|------------|-------------|----|------------|-------------|
| -0.1161003 | cg00587342 | PMM1        | 22 | 0.03123756 | 0.622835163 |
| -0.1670685 | cg02133350 | PMS2;PMS2   | 7  | 0.03175941 | 0.758549943 |
| -0.1560795 | cg12894984 | PNMT        | 17 | 0.00283338 | 0.557258184 |
| -0.1520094 | cg03066788 | PNOC        | 8  | 0.0060913  | 0.344928256 |
| -0.1496987 | cg22027204 | PNPLA1;PNP  | 6  | 0.00157943 | 0.614106426 |
| -0.1139981 | cg13405631 | PNPLA1;PNP  | 6  | 0.00486332 | 0.476285732 |
| -0.113293  | cg05673882 | POLK        | 5  | 0.00064187 | 0.463966391 |
| -0.2222573 | cg19741167 | POLR1A      | 2  | 0.0133082  | 0.357422671 |
| -0.2022511 | cg08279008 | POLR1A      | 2  | 0.03322952 | 0.342057836 |
| -0.1912448 | cg04915044 | POLR1A      | 2  | 0.03738527 | 0.333813967 |
| -0.1805275 | cg00201870 | POM121L12   | 7  | 0.00158387 | 0.568380808 |
| -0.1549212 | cg21862081 | POMT2       | 14 | 0.01095686 | 0.739255533 |
| -0.1424696 | cg20119798 | PON1        | 7  | 0.02661824 | 0.639353683 |
| -0.1045412 | cg20748065 | POR         | 7  | 0.03480153 | 0.826733384 |
| -0.112378  | cg10324703 | POU6F2;POU  | 7  | 0.00789781 | 0.423384032 |
| -0.1403938 | cg18537222 | PPARG;PPAR  | 3  | 0.04107849 | 0.821668925 |
| -0.107568  | cg17645677 | PPARGC1B    | 5  | 0.00613843 | 0.270065295 |
| -0.1958646 | cg16007497 | PPBPL1      | 4  | 0.04300287 | 0.692289286 |
| -0.1388965 | cg19769080 | PPM1B       | 2  | 0.03396112 | 0.521837715 |
| -0.1242756 | cg20872072 | PPM1G;PPM   | 2  | 0.04588774 | 0.754295807 |
| -0.2078162 | cg15016701 | PPM1H       | 12 | 0.00458626 | 0.597803571 |
| -0.1094512 | cg20749955 | PPP1R3B     | 8  | 0.01681993 | 0.489131513 |
| -0.1261942 | cg19335130 | PPP2R2B;PPF | 5  | 0.00069675 | 0.30195555  |
| -0.1170746 | cg22325673 | PPP2R2C;PPF | 4  | 0.00212896 | 0.572841231 |
| -0.1638743 | cg16616514 | PPP2R2C;PPF | 4  | 0.01180845 | 0.810697079 |
| -0.1405144 | cg20793532 | PPP2R2C;PPF | 4  | 0.04587371 | 0.425498617 |
| -0.1175235 | cg20910008 | PPP3CC      | 8  | 0.0054314  | 0.862738539 |
| -0.1030381 | cg07323947 | PPRC1       | 10 | 0.02977061 | 0.743802935 |
| -0.1191364 | cg08752433 | PPTC7       | 12 | 0.02124436 | 0.837999731 |
| -0.1508327 | cg23878241 | PPTC7       | 12 | 0.00444246 | 0.631123667 |
| -0.1567694 | cg27382409 | PPYR1       | 10 | 0.00158381 | 0.476496608 |
| -0.1038067 | cg01556246 | PRAGMIN     | 8  | 0.00023482 | 0.460535793 |
| -0.2322593 | cg14191279 | PRAM1       | 19 | 0.00076573 | 0.333403109 |
| -0.1052248 | cg02212855 | PRAP1;PRAP  | 10 | 0.00707096 | 0.373392591 |
| -0.1107292 | cg27345534 | PRB1;PRB1;P | 12 | 0.03773373 | 0.745560999 |
| -0.1441539 | cg02667677 | PRDM1;PRDM  | 6  | 0.00400838 | 0.375832279 |
| -0.1171195 | cg08369079 | PRDM1;PRDM  | 6  | 0.0089938  | 0.658473507 |
| -0.1005484 | cg08479635 | PRDM11      | 11 | 0.01557929 | 0.64625435  |
| -0.2788741 | cg18512336 | PRDM14      | 8  | 0.01572244 | 0.810616134 |
| -0.1185916 | cg19518104 | PRDM14      | 8  | 0.02331332 | 0.740847409 |
| -0.1056145 | cg14642381 | PRDM14      | 8  | 0.00699052 | 0.689452234 |
| -0.2048158 | cg08381918 | PRDM15;PRC  | 21 | 0.00556698 | 0.879786028 |
| -0.1367649 | cg17001566 | PRDM16;PRC  | 1  | 0.01204509 | 0.712627457 |
| -0.1523509 | cg05965745 | PRDM16;PRC  | 1  | 0.0160568  | 0.762717971 |
| -0.1013148 | cg16386396 | PRDM16;PRC  | 1  | 0.02100716 | 0.851370631 |
| -0.1513036 | cg06099439 | PRDM16;PRC  | 1  | 0.04127524 | 0.854715969 |

|            |            |              |    |            |             |
|------------|------------|--------------|----|------------|-------------|
| -0.1133624 | cg03082523 | PRDM16;PRC   | 1  | 0.00965573 | 0.881891502 |
| -0.1109866 | cg26222332 | PRDM16;PRC   | 1  | 0.04736523 | 0.700976522 |
| -0.1636351 | cg27187555 | PRDM16;PRC   | 1  | 0.02360659 | 0.633019871 |
| -0.1163359 | cg20699701 | PRDM16;PRC   | 1  | 0.03379734 | 0.635927224 |
| -0.1117693 | cg03527274 | PRDM16;PRC   | 1  | 0.01362847 | 0.719531649 |
| -0.1714601 | cg04852443 | PRDM16;PRC   | 1  | 0.0005335  | 0.642782173 |
| -0.1969624 | cg20236995 | PRDM16;PRC   | 1  | 0.02663821 | 0.733844222 |
| -0.1853415 | cg01448098 | PRDM16;PRC   | 1  | 0.01734389 | 0.716322059 |
| -0.1819072 | cg18759102 | PRDM16;PRC   | 1  | 0.00203093 | 0.794517852 |
| -0.140003  | cg22726349 | PRDM16;PRC   | 1  | 0.02802175 | 0.786343226 |
| -0.1163434 | cg01104489 | PRDM16;PRC   | 1  | 0.00518132 | 0.728168616 |
| -0.1121672 | cg09321238 | PRDM16;PRC   | 1  | 0.00190789 | 0.729146332 |
| -0.2348305 | cg03776662 | PRDM6        | 5  | 0.00312523 | 0.336712486 |
| -0.1037294 | cg07056285 | PRDM6        | 5  | 0.02530457 | 0.821056309 |
| -0.1439509 | cg07799386 | PRDM6        | 5  | 0.0005621  | 0.439502685 |
| -0.1678016 | cg02300584 | PRDM6        | 5  | 0.02608713 | 0.58383943  |
| -0.1349243 | cg02564291 | PRDM6        | 5  | 0.00452251 | 0.691635735 |
| -0.178274  | cg05569742 | PRDM6        | 5  | 0.01794149 | 0.608820239 |
| -0.2382801 | cg03729337 | PRDM6        | 5  | 0.00017241 | 0.778219113 |
| -0.1289657 | cg05668996 | PRDM6        | 5  | 0.00240818 | 0.642222367 |
| -0.1185639 | cg04503968 | PRDM6        | 5  | 0.00178705 | 0.71792435  |
| -0.1132919 | cg01085125 | PRDM6        | 5  | 0.01131525 | 0.67148917  |
| -0.1483149 | cg17786697 | PRDM6        | 5  | 0.00081347 | 0.662354057 |
| -0.141516  | cg07741162 | PRDM6        | 5  | 0.00014418 | 0.723448977 |
| -0.1133915 | cg09844573 | PRIC285;PRIC | 20 | 0.01565365 | 0.699309708 |
| -0.1120566 | cg15262954 | PRIC285;PRIC | 20 | 0.00429621 | 0.746964176 |
| -0.102092  | cg17593958 | PRIC285;PRIC | 20 | 0.03427423 | 0.743049239 |
| -0.1364595 | cg20584157 | PRICKLE2     | 3  | 0.01767443 | 0.684215354 |
| -0.1776068 | cg03567939 | PRKAG2;PRK   | 7  | 0.02714348 | 0.700625912 |
| -0.1540545 | cg12889538 | PRKAG2;PRK   | 7  | 0.00716572 | 0.56826301  |
| -0.1074384 | cg12304937 | PRKAR1B;PRI  | 7  | 0.00191734 | 0.727585003 |
| -0.1018237 | cg07689396 | PRKAR1B;PRI  | 7  | 0.01275686 | 0.725328248 |
| -0.1609519 | cg06728793 | PRKAR1B;PRI  | 7  | 0.00761185 | 0.747292026 |
| -0.1379174 | cg26780231 | PRKCA        | 17 | 0.03007016 | 0.853383736 |
| -0.1009629 | cg04721825 | PRKCA        | 17 | 0.01718676 | 0.75868463  |
| -0.2149656 | cg03503785 | PRKCB;PRKCI  | 16 | 0.02968838 | 0.659491508 |
| -0.1411429 | cg09877009 | PRKCQ        | 10 | 0.02587649 | 0.65100194  |
| -0.1262307 | cg01389728 | PRKCQ        | 10 | 0.01324603 | 0.742531202 |
| -0.1255558 | cg03543319 | PROKR1       | 2  | 0.00264449 | 0.508143212 |
| -0.1634523 | cg25501930 | ProSAPiP1    | 20 | 0.04196782 | 0.630789557 |
| -0.156839  | cg05925291 | PRPF31;TFPT  | 19 | 0.00562005 | 0.709790644 |
| -0.1387491 | cg14517133 | PRPH2        | 6  | 0.02029345 | 0.793836103 |
| -0.2444962 | cg06526721 | PRR16        | 5  | 0.01541094 | 0.424204261 |
| -0.1591461 | cg26115216 | PRR23B       | 3  | 0.00555862 | 0.717631704 |
| -0.1137827 | cg06972695 | PRR5;PRR5-A  | 22 | 0.00096211 | 0.364406689 |
| -0.1234249 | cg24019054 | PRR5;PRR5;P  | 22 | 0.00092019 | 0.49228175  |

|            |            |               |    |            |             |
|------------|------------|---------------|----|------------|-------------|
| -0.1305216 | cg22897615 | PRRT1         | 6  | 0.04128027 | 0.659962693 |
| -0.2380425 | cg02925367 | PRRT1         | 6  | 0.02604794 | 0.534921995 |
| -0.2051793 | cg14027333 | PRRT1         | 6  | 0.00250572 | 0.35020631  |
| -0.163369  | cg21570988 | PRRT1         | 6  | 0.00039229 | 0.698944191 |
| -0.1543137 | cg26849331 | PRRT1         | 6  | 0.00034301 | 0.424896834 |
| -0.1401641 | cg21035875 | PRRT1         | 6  | 0.00042729 | 0.682838556 |
| -0.102358  | cg14531663 | PRRT1         | 6  | 0.00123771 | 0.75029771  |
| -0.1015169 | cg17626960 | PRRT1         | 6  | 0.01696142 | 0.651786402 |
| -0.2535571 | cg09010107 | PRRX1;PRRX2   | 1  | 0.03351827 | 0.873307947 |
| -0.1622791 | cg02897989 | PRRX1;PRRX2   | 1  | 0.00632305 | 0.564797524 |
| -0.1217486 | cg11660018 | PRSS23        | 11 | 0.01217474 | 0.655187718 |
| -0.1127263 | cg14133635 | PRSS3         | 9  | 0.0061569  | 0.749202001 |
| -0.1203519 | cg22410499 | PRSS3         | 9  | 0.03862751 | 0.771948246 |
| -0.1200604 | cg06599390 | PRSSL1        | 19 | 0.02429852 | 0.587976189 |
| -0.1192595 | cg20633213 | PRTFDC1       | 10 | 0.004992   | 0.837997653 |
| -0.1245487 | cg25181170 | PRTFDC1       | 10 | 0.00297576 | 0.888461744 |
| -0.1089255 | cg17221584 | PRTG          | 15 | 0.03777206 | 0.668805217 |
| -0.1589844 | cg23386659 | PRTN3         | 19 | 0.00401483 | 0.498292277 |
| -0.1207658 | cg13914324 | PRUNE2        | 9  | 0.01723874 | 0.496192326 |
| -0.102716  | cg13446199 | PSCA          | 8  | 0.02743271 | 0.703546796 |
| -0.1825209 | cg16197388 | PSG3          | 19 | 0.01056333 | 0.46204062  |
| -0.1137556 | cg06496546 | PSG4;PSG4     | 19 | 0.00018414 | 0.333036329 |
| -0.1452071 | cg20193183 | psiTPTE22     | 22 | 0.04431403 | 0.816047491 |
| -0.1255098 | cg23106844 | PSMB4         | 1  | 0.01130945 | 0.758397862 |
| -0.1001219 | cg23750151 | PSMB8;PSME1   | 6  | 0.04549872 | 0.79169713  |
| -0.1157095 | cg02657012 | PSMB8;PSME1   | 6  | 0.02427882 | 0.899863197 |
| -0.1234783 | cg16483840 | PSMB8;PSME1   | 6  | 0.02358283 | 0.78979932  |
| -0.1615422 | cg11706729 | PSMB8;PSME1   | 6  | 0.02466785 | 0.733430139 |
| -0.1184432 | cg02567488 | PSMB9;PSME1   | 6  | 0.00146863 | 0.422083952 |
| -0.1505176 | cg13791092 | PSMF1;PSMF1   | 20 | 0.03173623 | 0.472677597 |
| -0.1787503 | cg07639783 | PSMG3;KIAA    | 7  | 0.01698454 | 0.684526415 |
| -0.1053529 | cg18369034 | PTGDR         | 14 | 0.00085179 | 0.588790559 |
| -0.1015265 | cg01091117 | PTGER4        | 5  | 0.00300811 | 0.630025655 |
| -0.1506333 | cg16060930 | PTGFRN        | 1  | 0.00495221 | 0.683866716 |
| -0.1975263 | cg15430294 | PTGIR         | 19 | 0.00416346 | 0.671581321 |
| -0.1757666 | cg11641102 | PTK2B;PTK2E   | 8  | 0.00025547 | 0.483624295 |
| -0.1325887 | cg21578195 | PTK6          | 20 | 0.01825491 | 0.57166326  |
| -0.188872  | cg25143652 | PTK6;PTK6     | 20 | 0.00132261 | 0.682902956 |
| -0.1498504 | cg20386404 | PTPN14        | 1  | 0.00105519 | 0.433545471 |
| -0.1098146 | cg15702949 | PTPN18;PTPN18 | 2  | 0.04796411 | 0.529130535 |
| -0.1021822 | cg07111834 | PTPN22;PTPN22 | 1  | 0.01466328 | 0.768510024 |
| -0.151381  | cg14311559 | PTPN6;PTPN6   | 12 | 0.01291495 | 0.678901035 |
| -0.2530692 | cg26842815 | PTPN6;PTPN6   | 12 | 0.01863742 | 0.710612414 |
| -0.1267719 | cg25746134 | PTPN7;PTPN7   | 1  | 0.02385241 | 0.768305714 |
| -0.1517419 | cg09887955 | PTPN7;PTPN7   | 1  | 0.0025219  | 0.57980738  |
| -0.1231947 | cg07053114 | PTPRE         | 10 | 0.00292054 | 0.569341523 |

|            |            |             |    |            |             |
|------------|------------|-------------|----|------------|-------------|
| -0.130911  | cg07986469 | PTPRE       | 10 | 0.00116356 | 0.537439727 |
| -0.100325  | cg01372366 | PTPRJ;PTPRJ | 11 | 0.02083477 | 0.799156247 |
| -0.244621  | cg22111167 | PTPRJ;PTPRJ | 11 | 0.02839025 | 0.774859402 |
| -0.122774  | cg05433557 | PTPRN2;PTPF | 7  | 0.00660162 | 0.768477793 |
| -0.1060865 | cg02956699 | PTPRN2;PTPF | 7  | 0.04445594 | 0.537883246 |
| -0.1210564 | cg11427314 | PTPRN2;PTPF | 7  | 0.02535835 | 0.3410126   |
| -0.1497124 | cg22337920 | PTPRN2;PTPF | 7  | 0.00056059 | 0.499212499 |
| -0.1450371 | cg02356647 | PTPRN2;PTPF | 7  | 0.03482098 | 0.744789076 |
| -0.1338618 | cg01818715 | PTPRN2;PTPF | 7  | 0.0001665  | 0.407541857 |
| -0.1192238 | cg00461149 | PTPRN2;PTPF | 7  | 0.00332444 | 0.448585432 |
| -0.1138111 | cg17429772 | PTPRN2;PTPF | 7  | 0.0068034  | 0.263883334 |
| -0.1055134 | cg13538299 | PTPRN2;PTPF | 7  | 0.00798031 | 0.740011206 |
| -0.1463226 | cg12600749 | PTPRN2;PTPF | 7  | 0.03819016 | 0.702418653 |
| -0.1330214 | cg12434889 | PTPRN2;PTPF | 7  | 0.00551246 | 0.377767151 |
| -0.1194222 | cg05144259 | PTPRN2;PTPF | 7  | 0.00638635 | 0.7713684   |
| -0.1521782 | cg25910519 | PTPRN2;PTPF | 7  | 0.039334   | 0.432279113 |
| -0.2217817 | cg22128328 | PTPRN2;PTPF | 7  | 0.03317419 | 0.494604661 |
| -0.1307332 | cg23385492 | PTPRN2;PTPF | 7  | 0.03091282 | 0.527370465 |
| -0.1001996 | cg04996300 | PTPRN2;PTPF | 7  | 0.0079037  | 0.560708404 |
| -0.1243746 | cg24842334 | PTPRN2;PTPF | 7  | 0.00808685 | 0.519025983 |
| -0.1035728 | cg03232056 | PTPRN2;PTPF | 7  | 0.0007601  | 0.448994328 |
| -0.1657574 | cg21900078 | PTPRN2;PTPF | 7  | 0.0033044  | 0.70740438  |
| -0.1631314 | cg14582691 | PTPRN2;PTPF | 7  | 0.00457136 | 0.737452776 |
| -0.1236546 | cg14468481 | PTPRN2;PTPF | 7  | 0.00277881 | 0.536191658 |
| -0.1204172 | cg03900492 | PTPRN2;PTPF | 7  | 0.00015308 | 0.588694593 |
| -0.1564144 | cg00914222 | PTPRU;PTPRI | 1  | 0.00172155 | 0.655128617 |
| -0.2193908 | cg02100997 | PTPRU;PTPRI | 1  | 0.00196766 | 0.520295443 |
| -0.1051872 | cg27196880 | PTRF        | 17 | 0.00419732 | 0.771346804 |
| -0.114448  | cg17971837 | PVALB       | 22 | 0.0283162  | 0.474965052 |
| -0.1052912 | cg07856761 | PVALB       | 22 | 0.01398378 | 0.449434144 |
| -0.1563055 | cg25221207 | PVRL1;PVRL1 | 11 | 0.03720287 | 0.553318057 |
| -0.1231958 | cg03402443 | PWRN1       | 15 | 0.04363775 | 0.680777096 |
| -0.1043749 | cg08216099 | PXDN        | 2  | 0.01355152 | 0.607900449 |
| -0.160694  | cg05556917 | PXT1        | 6  | 0.03224765 | 0.704058518 |
| -0.1041977 | cg08293102 | PYGL;PYGL   | 14 | 0.01365895 | 0.672909765 |
| -0.136914  | cg21962791 | PYROXD1     | 12 | 0.02458798 | 0.512424262 |
| -0.1394017 | cg05732883 | PYROXD2     | 10 | 0.00117905 | 0.823905404 |
| -0.2102722 | cg26712743 | PYROXD2     | 10 | 0.0071742  | 0.567299028 |
| -0.1299883 | cg05713242 | R3HCC1      | 8  | 0.03852941 | 0.402122878 |
| -0.1036865 | cg14774440 | RAB11FIP1;R | 8  | 0.02004662 | 0.888400543 |
| -0.1518001 | cg17960615 | RAB31       | 18 | 0.00083484 | 0.734557264 |
| -0.1016783 | cg14066471 | RAB37       | 17 | 0.00249388 | 0.295827564 |
| -0.1940528 | cg26366833 | RAB37;CD30I | 17 | 0.00859727 | 0.566052253 |
| -0.1087154 | cg21847347 | RAB37;CD30I | 17 | 0.03027132 | 0.744256864 |
| -0.2552089 | cg05506480 | RAB6B       | 3  | 0.04817405 | 0.645241161 |
| -0.19834   | cg00448875 | RAB6B       | 3  | 0.00693336 | 0.722587906 |

|            |            |              |    |            |             |
|------------|------------|--------------|----|------------|-------------|
| -0.1506684 | cg10777887 | RAB8B        | 15 | 0.0044016  | 0.778770679 |
| -0.1478583 | cg02747950 | RAB8B        | 15 | 0.01082688 | 0.74717088  |
| -0.1455351 | cg15381475 | RAC1;RAC1    | 7  | 0.00125005 | 0.826271245 |
| -0.1215142 | cg02152108 | RAC2         | 22 | 0.01187959 | 0.588555489 |
| -0.112637  | cg06894612 | RAD51L1      | 14 | 0.02200042 | 0.840799709 |
| -0.1004891 | cg25603108 | RAD51L1;RAI  | 14 | 0.03295075 | 0.360596516 |
| -0.2737298 | cg08297686 | RAD51L1;RAI  | 14 | 0.0032768  | 0.723824021 |
| -0.2250297 | cg20133901 | RAD54L2      | 3  | 0.0062432  | 0.714256716 |
| -0.2168249 | cg14260083 | RADIL        | 7  | 0.02990814 | 0.682726517 |
| -0.2124523 | cg12427317 | RAI14;RAI14; | 5  | 0.00451559 | 0.813076874 |
| -0.207984  | cg20322193 | RALA         | 7  | 0.00643337 | 0.302029447 |
| -0.204848  | cg20842915 | RALA         | 7  | 0.03322952 | 0.70140941  |
| -0.1714026 | cg06876354 | RALB         | 2  | 0.00759445 | 0.612980465 |
| -0.1566535 | cg14083146 | RALGAPA2     | 20 | 0.00021343 | 0.586796874 |
| -0.147387  | cg19382191 | RAMP3        | 7  | 0.0145139  | 0.618914405 |
| -0.1390158 | cg08622666 | RANBP9       | 6  | 0.00497183 | 0.802626064 |
| -0.1389419 | cg06205333 | RAP1A;RAP1A  | 1  | 0.02422573 | 0.684377956 |
| -0.1384528 | cg03866192 | RAP1GAP2;R   | 17 | 0.02752133 | 0.474554467 |
| -0.1375925 | cg09981407 | RAP1GAP2;R   | 17 | 0.01213205 | 0.502161189 |
| -0.127855  | cg18553223 | RAP1GAP2;R   | 17 | 0.00605544 | 0.653637144 |
| -0.1276169 | cg13784312 | RAPGEF1      | 9  | 0.03646663 | 0.77544066  |
| -0.1238514 | cg13655250 | RAPGEF1;RAI  | 9  | 0.01947949 | 0.61676176  |
| -0.1210426 | cg22900476 | RAPGEF4      | 2  | 0.00461063 | 0.781673995 |
| -0.1180916 | cg11094248 | RARA;RARA;f  | 17 | 0.00934837 | 0.773137196 |
| -0.116426  | cg07944862 | RARA;RARA;f  | 17 | 0.01707844 | 0.69694838  |
| -0.1151923 | cg21646032 | RARB;RARB    | 3  | 0.0203746  | 0.857006278 |
| -0.1138244 | cg14986890 | RARRES1;RAI  | 3  | 0.03716817 | 0.401489633 |
| -0.1128834 | cg26181840 | RASA3        | 13 | 0.00696501 | 0.924047002 |
| -0.1115239 | cg04402088 | RASA3        | 13 | 0.00446668 | 0.792934897 |
| -0.1105759 | cg11686792 | RASA3        | 13 | 0.0234129  | 0.565549644 |
| -0.1085444 | cg15972148 | RASA3        | 13 | 0.01250402 | 0.827825759 |
| -0.1068341 | cg10976218 | RASA3        | 13 | 0.01955655 | 0.670691267 |
| -0.1066723 | cg01811815 | RASA3        | 13 | 0.00883308 | 0.796559735 |
| -0.1058697 | cg11288831 | RASA3        | 13 | 0.00937294 | 0.761066007 |
| -0.102811  | cg16046375 | RASA3        | 13 | 0.00228345 | 0.716159788 |
| -0.100454  | cg01616876 | RASAL1       | 12 | 0.01764319 | 0.615374008 |
| -0.1235527 | cg16890739 | RASAL1       | 12 | 0.00322144 | 0.534393269 |
| -0.1078629 | cg00404053 | RASAL2;RAS   | 1  | 0.0145657  | 0.620133919 |
| -0.1211058 | cg05504085 | RASAL3       | 19 | 0.00143752 | 0.427641875 |
| -0.1328567 | cg04707603 | RASGRP3;RA   | 2  | 0.02689494 | 0.694994818 |
| -0.1173704 | cg01932734 | RASSF1;RASS  | 3  | 0.00454754 | 0.593779296 |
| -0.1423993 | cg05989693 | RASSF1;RASS  | 3  | 0.03854946 | 0.743972227 |
| -0.1244099 | cg13042575 | RASSF3       | 12 | 0.03117339 | 0.440173812 |
| -0.1931208 | cg12691994 | RASSF5;RASS  | 1  | 0.01385614 | 0.727461449 |
| -0.1163703 | cg25593159 | RASSF5;RASS  | 1  | 0.01881042 | 0.826243513 |
| -0.1974284 | cg27035734 | RASSF9       | 12 | 0.00144732 | 0.261456356 |

|            |            |             |    |            |             |
|------------|------------|-------------|----|------------|-------------|
| -0.1113251 | cg06740227 | RASSF9      | 12 | 0.000644   | 0.248464094 |
| -0.1877163 | cg10992219 | RB1CC1;RB1C | 8  | 0.0040228  | 0.755166629 |
| -0.1270095 | cg02311932 | RBM24;RBM   | 6  | 0.01388174 | 0.416482698 |
| -0.1476423 | cg02066331 | RBM24;RBM   | 6  | 0.01905044 | 0.533393526 |
| -0.1604854 | cg15168816 | RBM24;RBM   | 6  | 0.00068256 | 0.394104707 |
| -0.1410791 | cg14466942 | RBM24;RBM   | 6  | 0.00144583 | 0.661590012 |
| -0.122175  | cg27262236 | RBM38;RBM   | 20 | 0.00648868 | 0.659754585 |
| -0.1001366 | cg22496683 | RBM46       | 4  | 0.02175475 | 0.44532516  |
| -0.1534946 | cg00137234 | RBM46       | 4  | 0.01384817 | 0.466930915 |
| -0.1427104 | cg27076223 | RBM47       | 4  | 0.03497466 | 0.796636384 |
| -0.1039834 | cg22062068 | RBMXL2      | 11 | 0.01665941 | 0.616369561 |
| -0.1202316 | cg02837128 | RBPM5;RBPM  | 8  | 0.0100349  | 0.464383173 |
| -0.14807   | cg13707794 | RCAN1;RCAN  | 21 | 0.03274521 | 0.622903857 |
| -0.1048403 | cg02552250 | RCBTB2      | 13 | 0.00144933 | 0.641510854 |
| -0.1371505 | cg09829263 | RCBTB2      | 13 | 0.00467735 | 0.653615116 |
| -0.1331038 | cg11093142 | RCBTB2      | 13 | 0.00261673 | 0.830796327 |
| -0.1180003 | cg04275362 | RCS1        | 1  | 0.01622719 | 0.860459425 |
| -0.1012203 | cg15676719 | RCS1        | 1  | 0.00220544 | 0.732447203 |
| -0.1401573 | cg00658007 | RD3;RD3;RD  | 1  | 0.04418929 | 0.801273635 |
| -0.1524085 | cg15359390 | REG1P       | 2  | 0.00147013 | 0.64684942  |
| -0.1363967 | cg15692837 | REG3A;REG3  | 2  | 0.00307609 | 0.53271229  |
| -0.1307255 | cg07184423 | REPS1;REPS1 | 6  | 0.02367337 | 0.732128355 |
| -0.1531044 | cg02098619 | RERE;RERE   | 1  | 0.00185834 | 0.643105451 |
| -0.1232068 | cg05045335 | RERE;RERE;R | 1  | 0.00525189 | 0.478121892 |
| -0.1210045 | cg20316440 | RERE;RERE;R | 1  | 0.03781117 | 0.538343084 |
| -0.1021793 | cg02346997 | RETN        | 19 | 0.00987029 | 0.624352174 |
| -0.1084236 | cg03852656 | RFC4;RFC4   | 3  | 0.02660008 | 0.773544166 |
| -0.1366822 | cg13672743 | RFFL        | 17 | 0.00456507 | 0.469631681 |
| -0.1190675 | cg10464462 | RFFL        | 17 | 0.00417998 | 0.667545303 |
| -0.2055742 | cg11184109 | RFT1        | 3  | 0.02484499 | 0.533859732 |
| -0.1973908 | cg13026795 | RFTN1       | 3  | 0.00171197 | 0.551506865 |
| -0.1492117 | cg00259834 | RFTN1       | 3  | 0.000644   | 0.585985243 |
| -0.1491883 | cg04381957 | RFTN1       | 3  | 0.00258393 | 0.727841467 |
| -0.1289493 | cg22693863 | RFX1        | 19 | 0.02897518 | 0.662418813 |
| -0.22806   | cg05991009 | RFX8        | 2  | 0.00529822 | 0.851267521 |
| -0.118473  | cg22489931 | RGMA;RGMF   | 15 | 0.0086439  | 0.593199063 |
| -0.1770643 | cg15611912 | RGS10       | 10 | 0.00628725 | 0.541787612 |
| -0.1717499 | cg17276535 | RGS12;RGS1  | 4  | 0.00129714 | 0.409271307 |
| -0.1644421 | cg18944752 | RGS12;RGS1  | 4  | 0.0197605  | 0.29518792  |
| -0.137538  | cg25461508 | RGS14       | 5  | 0.00656922 | 0.337685628 |
| -0.1354289 | cg24028809 | RGS17       | 6  | 0.01514112 | 0.699355761 |
| -0.1864537 | cg10299383 | RGS20;RGS2  | 8  | 0.00987394 | 0.656670412 |
| -0.210572  | cg11993173 | RGS20;RGS2  | 8  | 0.01936077 | 0.532631979 |
| -0.1530512 | cg13604445 | RGS3;RGS3;R | 9  | 0.00171542 | 0.421393971 |
| -0.1030624 | cg05111779 | RGS6        | 14 | 0.02234245 | 0.556177489 |
| -0.1579308 | cg21899942 | RGS6        | 14 | 0.02127053 | 0.705210201 |

|            |               |             |    |            |             |
|------------|---------------|-------------|----|------------|-------------|
| -0.1377915 | cg18515872    | RGS6        | 14 | 0.00911881 | 0.582776864 |
| -0.1351188 | cg25329734    | RGS9;RGS9;R | 17 | 0.00029687 | 0.239753725 |
| -0.1215097 | cg14145159    | RHOBTB2;RH  | 8  | 0.00696246 | 0.480215412 |
| -0.1119759 | cg24497361    | RHOG        | 11 | 0.01744086 | 0.502747073 |
| -0.1697614 | cg07768107    | RHOH        | 4  | 0.00587959 | 0.694918525 |
| -0.1428139 | cg16086237    | RIMBP2      | 12 | 0.00284579 | 0.494254514 |
| -0.1202126 | cg23373401    | RIMBP2      | 12 | 0.00731227 | 0.61591852  |
| -0.1328524 | cg05939560    | RIMBP2      | 12 | 0.00110998 | 0.504616309 |
| -0.1396965 | cg00009196    | RIN2        | 20 | 0.00011092 | 0.583059404 |
| -0.1490812 | cg02902617    | RIN3        | 14 | 0.01068914 | 0.870226533 |
| -0.1320096 | ch.14.1488981 | RIN3        | 14 | 0.01497958 | 0.449771443 |
| -0.1674454 | cg18712792    | RNASE1;RNA  | 14 | 0.00143229 | 0.304612584 |
| -0.1488557 | cg10197238    | RNASE1;RNA  | 14 | 0.0077358  | 0.659790691 |
| -0.1445716 | cg12940993    | RNASE1;RNA  | 14 | 0.00147876 | 0.534312883 |
| -0.1004844 | cg18836485    | RNASE1;RNA  | 14 | 0.00545547 | 0.744230088 |
| -0.1604864 | cg24851490    | RNASE2      | 14 | 0.00813577 | 0.325157881 |
| -0.1480819 | cg18294707    | RNASE2      | 14 | 0.00092951 | 0.414016141 |
| -0.1079071 | cg00502926    | RNASE7      | 14 | 0.04105108 | 0.337761476 |
| -0.1137738 | cg01449715    | RNASEH2B;R  | 13 | 0.02123142 | 0.612981357 |
| -0.1715507 | cg22730412    | RNF11       | 1  | 0.0365257  | 0.635351304 |
| -0.1375248 | cg14272075    | RNF126P1    | 17 | 0.02352705 | 0.824539298 |
| -0.1244121 | cg06418113    | RNF165      | 18 | 0.01355967 | 0.578531029 |
| -0.1183435 | cg06788514    | RNF166      | 16 | 0.01188724 | 0.523735829 |
| -0.1120714 | cg16789707    | RNF166      | 16 | 0.00183412 | 0.452292419 |
| -0.1068325 | cg01981354    | RNF170;RNF: | 8  | 0.00233351 | 0.516815386 |
| -0.1125727 | cg23146741    | RNF170;RNF: | 8  | 0.03454353 | 0.857054741 |
| -0.1107545 | cg24820936    | RNF19A;RNF  | 8  | 0.00253713 | 0.581347402 |
| -0.1405916 | cg11622162    | RNF213;RNF: | 17 | 0.00376223 | 0.717508001 |
| -0.1745634 | cg11519930    | RNF220      | 1  | 0.02060927 | 0.550085054 |
| -0.14847   | cg01942845    | RNU5E;RNU5  | 5  | 0.00159588 | 0.318476515 |
| -0.1438178 | cg02940147    | ROBO3       | 11 | 0.01633522 | 0.495635861 |
| -0.1202595 | cg09684429    | ROBO4       | 11 | 0.03076226 | 0.787808554 |
| -0.202638  | cg19764370    | ROBO4       | 11 | 0.00987996 | 0.713750181 |
| -0.1376992 | cg02043679    | ROBO4       | 11 | 0.00032077 | 0.452902947 |
| -0.1049875 | cg16143578    | ROBO4;ROBO  | 11 | 0.00029687 | 0.691398021 |
| -0.1217273 | cg01393945    | ROPN1L      | 5  | 0.01648236 | 0.779589605 |
| -0.1500522 | cg14244439    | ROR2        | 9  | 0.00256827 | 0.818417315 |
| -0.145257  | cg20009332    | RP1L1       | 8  | 0.00027402 | 0.234862326 |
| -0.1076378 | cg09154794    | RPA2        | 1  | 0.03048053 | 0.882501266 |
| -0.1286931 | cg13538637    | RPA3        | 7  | 0.04839906 | 0.486203569 |
| -0.23321   | cg18216249    | RPAP3;RPAP: | 12 | 0.00095023 | 0.485749248 |
| -0.2069365 | cg12681402    | RPH3A;RPH3  | 12 | 0.01106838 | 0.215095014 |
| -0.1059365 | cg02938172    | RPH3AL      | 17 | 0.04159142 | 0.705528471 |
| -0.192932  | cg20491963    | RPL31P11    | 1  | 0.00966505 | 0.756077965 |
| -0.182866  | cg08014182    | RPS18       | 6  | 0.03559265 | 0.626114036 |
| -0.1418225 | cg13271206    | RPS3        | 11 | 0.04168135 | 0.880572648 |



|            |            |             |    |            |             |
|------------|------------|-------------|----|------------|-------------|
| -0.1361504 | cg16490823 | RPS6KA2     | 6  | 0.00018963 | 0.241011723 |
| -0.1037246 | cg03849851 | RPS6KA2;RPS | 6  | 0.01203213 | 0.759261194 |
| -0.1609033 | cg23002590 | RPS6KA2;RPS | 6  | 0.00280031 | 0.664951175 |
| -0.1482505 | cg15857379 | RPS9        | 19 | 0.00440889 | 0.897942897 |
| -0.2953228 | cg26897081 | RPS9        | 19 | 0.0338893  | 0.846297832 |
| -0.2511894 | cg24667756 | RPTOR;RPTO  | 17 | 0.02431543 | 0.62899969  |
| -0.2209146 | cg26684776 | RRAGD       | 6  | 0.02227119 | 0.72041005  |
| -0.211693  | cg24899545 | RREB1;RREB1 | 6  | 0.03093011 | 0.562302684 |
| -0.1822744 | cg22335826 | RREB1;RREB1 | 6  | 0.00041808 | 0.453878896 |
| -0.149375  | cg26932790 | RRN3P1      | 16 | 0.00684002 | 0.32893435  |
| -0.1238853 | cg12132508 | RRP15       | 1  | 0.00760558 | 0.671541054 |
| -0.102213  | cg10959651 | RSAD2       | 2  | 0.01002915 | 0.59152403  |
| -0.1511898 | cg26668129 | RSBN1       | 1  | 0.01603188 | 0.438766328 |
| -0.1854394 | cg24249648 | RSPH3       | 6  | 0.00356152 | 0.772427074 |
| -0.1487254 | cg03569404 | RSPO4;RSPO  | 20 | 0.02448547 | 0.557427589 |
| -0.1779264 | cg05879505 | RTN4RL1     | 17 | 0.00100184 | 0.543866228 |
| -0.1674461 | cg19956836 | RTN4RL2     | 11 | 0.03064325 | 0.495175013 |
| -0.1239228 | cg16570129 | RUFY1;RUFY  | 5  | 0.01987447 | 0.86285206  |
| -0.1333063 | cg08443845 | RUNX1       | 21 | 0.03132539 | 0.486523677 |
| -0.168011  | cg15091747 | RUNX1       | 21 | 0.00140084 | 0.55512587  |
| -0.1384749 | cg19836199 | RUNX1       | 21 | 0.00191872 | 0.638039814 |
| -0.1308171 | cg13030790 | RUNX1;RUNX  | 21 | 0.00637775 | 0.2396303   |
| -0.1233677 | cg01519261 | RUNX1;RUNX  | 21 | 0.00931647 | 0.606563303 |
| -0.178419  | cg04915566 | RUNX1;RUNX  | 21 | 0.00210829 | 0.610984801 |
| -0.1467149 | cg22328837 | RUNX2;RUNX  | 6  | 0.02656072 | 0.831930517 |
| -0.1115805 | cg22153728 | RUNX3       | 1  | 0.00358506 | 0.672250253 |
| -0.2625006 | cg09993145 | RUNX3       | 1  | 0.00015312 | 0.78673715  |
| -0.1582056 | cg04554131 | RUNX3       | 1  | 0.02883355 | 0.669585339 |
| -0.1375815 | cg13461622 | RUNX3;RUNX  | 1  | 0.00999459 | 0.807904344 |
| -0.1169771 | cg02127980 | RXRA        | 9  | 0.00731024 | 0.671428583 |
| -0.1344042 | cg14236758 | RXRA        | 9  | 0.00258308 | 0.785073024 |
| -0.2454816 | cg02987387 | RYR1;RYR1   | 19 | 0.0121384  | 0.487964035 |
| -0.1062284 | cg10774802 | RYR1;RYR1   | 19 | 0.00089898 | 0.738227764 |
| -0.1588103 | cg03181524 | RYR1;RYR1   | 19 | 0.02330216 | 0.726757845 |
| -0.1289863 | cg01411912 | S100A4;S100 | 1  | 0.02083811 | 0.632572144 |
| -0.1388752 | cg24691453 | S100A4;S100 | 1  | 0.00038848 | 0.37659267  |
| -0.1073077 | cg13091627 | S100A4;S100 | 1  | 0.00089065 | 0.538129174 |
| -0.1139436 | cg26303281 | S100A5      | 1  | 0.01191441 | 0.357109002 |
| -0.113828  | cg21217846 | S100A5      | 1  | 0.03173532 | 0.764513901 |
| -0.1350841 | cg24898863 | S100A8      | 1  | 0.00222195 | 0.604490201 |
| -0.1484579 | cg03514239 | S100A9      | 1  | 0.01617015 | 0.631740044 |
| -0.1156531 | cg26324978 | S100Z;S100Z | 5  | 0.00880302 | 0.362254619 |
| -0.1881818 | cg27121758 | S1PR4       | 19 | 0.0329779  | 0.437708158 |
| -0.1793323 | cg20781880 | S1PR4       | 19 | 0.00151456 | 0.443924332 |
| -0.1480472 | cg14742715 | SAA1;SAA1   | 11 | 0.00059558 | 0.550821087 |
| -0.1447836 | cg15484375 | SAA1;SAA1   | 11 | 0.00079533 | 0.530014785 |

|            |            |             |    |            |             |
|------------|------------|-------------|----|------------|-------------|
| -0.1326695 | cg12907644 | SAA2;SAA2   | 11 | 0.0050545  | 0.631447543 |
| -0.1208391 | cg09314984 | SAFB        | 19 | 0.01165628 | 0.361371688 |
| -0.1206284 | cg08199953 | SALL1;SALL1 | 16 | 0.01740518 | 0.604175384 |
| -0.2554451 | cg02507889 | SALL3       | 18 | 0.00698852 | 0.772964712 |
| -0.1741553 | cg17018082 | SAMD12;SAM  | 8  | 0.01712639 | 0.704551221 |
| -0.158661  | cg20466954 | SAMD13;SAM  | 1  | 0.00056775 | 0.292664819 |
| -0.1453524 | cg21483922 | SAMD14      | 17 | 0.01004736 | 0.843585389 |
| -0.1349092 | cg08986767 | SAMD9;SAM   | 7  | 0.00033537 | 0.376987103 |
| -0.1296554 | cg01373248 | SATB1       | 3  | 0.00264505 | 0.316914691 |
| -0.1161914 | cg04554576 | SATB2       | 2  | 0.03532668 | 0.629748806 |
| -0.1009825 | cg06876053 | SBF2        | 11 | 0.00667909 | 0.476707042 |
| -0.1009702 | cg14068721 | SBK2        | 19 | 0.00546756 | 0.666840343 |
| -0.1610136 | cg01990184 | SCARA5      | 8  | 0.01246868 | 0.651202609 |
| -0.1866741 | cg17297634 | SCARA5      | 8  | 0.00312125 | 0.453659102 |
| -0.1477105 | cg15143938 | SCARNA20;U  | 17 | 0.0389858  | 0.837466848 |
| -0.1195042 | cg03349134 | SCGN        | 6  | 0.00245184 | 0.44571917  |
| -0.1465283 | cg12027068 | SCHIP1      | 3  | 0.01305054 | 0.712641413 |
| -0.1034691 | cg18751231 | SCHIP1      | 3  | 0.02419911 | 0.721531767 |
| -0.2320379 | cg20314918 | SCN2A;SCN2  | 2  | 0.00152272 | 0.721240493 |
| -0.2005716 | cg07439618 | SCN5A;SCN5  | 3  | 0.01917209 | 0.468540736 |
| -0.1490952 | cg13126638 | SCNN1A      | 12 | 0.00105928 | 0.77169467  |
| -0.1468853 | cg09680149 | SCNN1A      | 12 | 0.00185104 | 0.376491377 |
| -0.1256633 | cg20366549 | SCNN1A;SCN  | 12 | 0.0187048  | 0.523852016 |
| -0.1372923 | cg05648303 | SCOC;SCOC;S | 4  | 0.00081604 | 0.633185987 |
| -0.1367766 | cg13201172 | SCRIB;SCRIB | 8  | 0.03152169 | 0.767517858 |
| -0.1123447 | cg11183307 | SCRT2       | 20 | 0.01226109 | 0.686122213 |
| -0.1531132 | cg26736232 | SCT         | 11 | 0.00554007 | 0.775845136 |
| -0.1377645 | cg10944063 | SCTR        | 2  | 0.02809131 | 0.613216412 |
| -0.1049624 | cg06968788 | SDC4P       | 22 | 0.04589384 | 0.740265093 |
| -0.1572325 | cg19510699 | SDCBP2      | 20 | 0.03720197 | 0.474835944 |
| -0.1170579 | cg00295780 | SDCCAG8     | 1  | 0.03378301 | 0.538639327 |
| -0.1185497 | cg08102516 | SDK1        | 7  | 0.0143046  | 0.255260033 |
| -0.1973163 | cg17756105 | SDK1        | 7  | 0.01354941 | 0.360998057 |
| -0.1946582 | cg25274735 | SDK1        | 7  | 0.00252599 | 0.635648933 |
| -0.1669008 | cg27005946 | SDK1        | 7  | 0.00063254 | 0.490315244 |
| -0.1665394 | cg16250868 | SDK1        | 7  | 0.00851079 | 0.440506045 |
| -0.1531206 | cg04004830 | SDPR        | 2  | 0.01138394 | 0.707306717 |
| -0.1286088 | cg16790374 | SDR16C5     | 8  | 0.00036466 | 0.683828424 |
| -0.1179049 | cg04123409 | SDS;SDS     | 12 | 0.00588996 | 0.409002374 |
| -0.1559871 | cg05149586 | SDSL        | 12 | 0.00030589 | 0.371852149 |
| -0.1191721 | cg11348106 | SEC14L1;SEC | 17 | 0.00138064 | 0.873376921 |
| -0.1019203 | cg15193228 | SEC14L3     | 22 | 0.03275894 | 0.66881579  |
| -0.1046608 | cg25750901 | SEC14L3     | 22 | 0.00112295 | 0.41000368  |
| -0.1009331 | cg13855364 | SEC16A      | 9  | 0.01130945 | 0.880900443 |
| -0.1631    | cg16511445 | SEC22B      | 1  | 0.00775033 | 0.456392737 |
| -0.1244278 | cg25686812 | SEC22C;SEC2 | 3  | 0.01480469 | 0.457362059 |

|            |            |             |    |            |             |
|------------|------------|-------------|----|------------|-------------|
| -0.1694683 | cg16640599 | SEC24D      | 4  | 0.03842438 | 0.762209786 |
| -0.1213381 | cg09043518 | SECTM1      | 17 | 0.02466673 | 0.770652742 |
| -0.1461751 | cg09461545 | SEL1L3      | 4  | 0.01848878 | 0.514767223 |
| -0.1283913 | cg19853494 | SELL        | 1  | 0.00121139 | 0.512211801 |
| -0.1509666 | cg00159243 | SELPLG      | 12 | 0.00749081 | 0.363125627 |
| -0.1271529 | cg22328644 | SELPLG      | 12 | 0.00989094 | 0.700609651 |
| -0.1067436 | cg25165932 | SELPLG      | 12 | 0.0005641  | 0.427892125 |
| -0.1289202 | cg21234471 | SEMA4D;SEM  | 9  | 0.02661712 | 0.632208265 |
| -0.1343137 | cg01477253 | SEMA4F      | 2  | 0.02870391 | 0.846761831 |
| -0.1321871 | cg17679604 | SEMA6A      | 5  | 0.00472698 | 0.368525812 |
| -0.1309825 | cg20015689 | SEMG1       | 20 | 0.03677459 | 0.620050674 |
| -0.1611493 | cg05474605 | SEPP1;SEPP1 | 5  | 4.07E-05   | 0.419164058 |
| -0.1355097 | cg21542842 | SEPT11      | 4  | 0.00038819 | 0.58612156  |
| -0.1515155 | cg00934987 | SEPT4;SEPT4 | 17 | 0.00085636 | 0.534570195 |
| -0.1460545 | cg23343486 | SEPT9;SEPT9 | 17 | 0.04177808 | 0.812758303 |
| -0.1264939 | cg22056755 | SERAC1      | 6  | 0.00233838 | 0.82686051  |
| -0.1278282 | cg18939081 | SERINC2     | 1  | 0.02714584 | 0.720181468 |
| -0.104802  | cg04368971 | SERPINA11   | 14 | 0.02427243 | 0.592821915 |
| -0.1695824 | cg21007342 | SERPINA11   | 14 | 0.00089553 | 0.630236328 |
| -0.1209374 | cg00777079 | SERPINF1    | 17 | 0.02530845 | 0.685674693 |
| -0.1160213 | cg15448220 | SETDB1;SETC | 1  | 0.01937428 | 0.843890777 |
| -0.1801336 | cg08698159 | SEZ6;SEZ6   | 17 | 0.02092426 | 0.57489341  |
| -0.127563  | cg05050042 | SFRP2       | 4  | 0.01770208 | 0.859363315 |
| -0.1068462 | cg13732865 | SFRP2       | 4  | 0.00296811 | 0.772094842 |
| -0.1050102 | cg01821854 | SFRP2       | 4  | 0.02874966 | 0.369242311 |
| -0.1006548 | cg10790791 | SFRP2       | 4  | 0.03446502 | 0.455965697 |
| -0.1665283 | cg05241277 | SFRP2       | 4  | 0.00417563 | 0.834088803 |
| -0.1671519 | cg00705808 | SFRP2       | 4  | 0.01605745 | 0.414683437 |
| -0.1160587 | cg04959480 | SFRP2       | 4  | 0.00052359 | 0.780901642 |
| -0.1319523 | cg13357229 | SFRP2       | 4  | 0.03561721 | 0.496507483 |
| -0.1093957 | cg10663078 | SFRP2       | 4  | 0.01324336 | 0.753530539 |
| -0.1842482 | cg20727217 | SFRP2       | 4  | 0.00688465 | 0.666286916 |
| -0.1105101 | cg21630608 | SFRP2       | 4  | 0.00180549 | 0.60619303  |
| -0.1977302 | cg25187161 | SFRS4       | 1  | 0.01232798 | 0.840942485 |
| -0.1153728 | cg01134967 | SFTPA1;SFTP | 10 | 0.00552218 | 0.779706418 |
| -0.138574  | cg20393620 | SGK1        | 6  | 0.01835913 | 0.282239892 |
| -0.1345253 | cg04905719 | SGK1        | 6  | 0.0002333  | 0.517605091 |
| -0.1188832 | cg09404376 | SGK1;SGK1   | 6  | 0.00023272 | 0.431885584 |
| -0.1083936 | cg02904344 | SGK1;SGK1;S | 6  | 0.00147013 | 0.745999026 |
| -0.1537831 | cg01356824 | SH2B3       | 12 | 0.00459254 | 0.451138248 |
| -0.105838  | cg26501657 | SH2B3       | 12 | 0.00314809 | 0.743511582 |
| -0.1485491 | cg27003165 | SH2D1B      | 1  | 0.00055312 | 0.482001346 |
| -0.1041803 | cg20839149 | SH2D2A;NTR  | 1  | 7.47E-05   | 0.231947328 |
| -0.1072907 | cg06888746 | SH3PXD2A    | 10 | 0.00372642 | 0.678442082 |
| -0.1063112 | cg18135683 | SH3PXD2B    | 5  | 0.01544883 | 0.612082671 |
| -0.1940976 | cg16572224 | SH3PXD2B    | 5  | 0.00312911 | 0.755433654 |

|            |            |               |    |            |             |
|------------|------------|---------------|----|------------|-------------|
| -0.1502841 | cg19027424 | SH3PXD2B      | 5  | 0.01041846 | 0.7985856   |
| -0.1493442 | cg09178384 | SH3RF1        | 4  | 0.00202105 | 0.475961397 |
| -0.1431355 | cg20810222 | SH3RF3        | 2  | 0.04634646 | 0.891016384 |
| -0.1249801 | cg16635948 | SH3RF3        | 2  | 0.01472355 | 0.781588319 |
| -0.1171032 | cg16312514 | SHANK2        | 11 | 0.02687144 | 0.80837099  |
| -0.1019034 | cg03482617 | SHANK2        | 11 | 0.00156123 | 0.903105887 |
| -0.1253268 | cg04404381 | SHANK2        | 11 | 0.00012742 | 0.568247633 |
| -0.1349415 | cg26645082 | SHANK2        | 11 | 0.00033508 | 0.567570697 |
| -0.1008899 | cg13813366 | SHISA3        | 4  | 0.0090576  | 0.846301067 |
| -0.1701743 | cg14831622 | SHISA6        | 17 | 0.02807327 | 0.349342295 |
| -0.1444236 | cg26940328 | SHISA6        | 17 | 0.00043254 | 0.256416276 |
| -0.1058986 | cg07631533 | SHISA9        | 16 | 0.01060922 | 0.62027775  |
| -0.1691914 | cg03222834 | SHISA9        | 16 | 0.01353714 | 0.709949973 |
| -0.153671  | cg27372422 | SHKBP1        | 19 | 0.03913753 | 0.891304737 |
| -0.1165484 | cg12315391 | SHOX2;SHOX    | 3  | 0.02817631 | 0.828477542 |
| -0.1154767 | cg04503593 | SHROOM3       | 4  | 0.00829898 | 0.794597675 |
| -0.104549  | cg04461123 | SHROOM3       | 4  | 0.02155581 | 0.851579572 |
| -0.113135  | cg11615509 | SHROOM3       | 4  | 0.02379866 | 0.516074137 |
| -0.1048114 | cg19162496 | SHROOM3       | 4  | 0.00150232 | 0.621963362 |
| -0.1016841 | cg20311846 | SHROOM3       | 4  | 0.00088839 | 0.356975329 |
| -0.1616185 | cg27417997 | SHROOM3;SI    | 4  | 0.00123194 | 0.512085564 |
| -0.1088871 | cg04029159 | SIGIRR;SIGIRI | 11 | 0.00111269 | 0.301518989 |
| -0.1331813 | cg02381385 | SIGLEC12      | 19 | 0.00984979 | 0.607105416 |
| -0.1418083 | cg25969123 | SIGLEC12;SIC  | 19 | 0.02792649 | 0.674683101 |
| -0.1320491 | cg12530021 | SIGLEC12;SIC  | 19 | 0.00473801 | 0.480235414 |
| -0.1172409 | cg27086014 | SIGLEC12;SIC  | 19 | 0.01082688 | 0.688238716 |
| -0.1563748 | cg23096558 | SIGLECP3      | 19 | 0.02525645 | 0.550096994 |
| -0.1145985 | cg08861404 | SIGLECP3      | 19 | 0.00030339 | 0.47021606  |
| -0.1503755 | cg21982437 | SIGLECP3      | 19 | 0.00017449 | 0.382757686 |
| -0.113553  | cg00365692 | SIGLECP3      | 19 | 0.01153834 | 0.635169699 |
| -0.1318486 | cg17610755 | SIK1          | 21 | 6.98E-05   | 0.331259197 |
| -0.106208  | cg09458566 | SIK3          | 11 | 0.03163744 | 0.651864683 |
| -0.1784254 | cg23588121 | SIM1          | 6  | 0.00273444 | 0.663125406 |
| -0.1302915 | cg06246999 | SIM1          | 6  | 0.00255765 | 0.433411353 |
| -0.1614432 | cg26701242 | SIM2;SIM2     | 21 | 0.00928194 | 0.788288834 |
| -0.2514214 | cg26720125 | SIM2;SIM2     | 21 | 0.00020418 | 0.367992602 |
| -0.1101442 | cg02194789 | SIM2;SIM2     | 21 | 0.03818051 | 0.494148048 |
| -0.1192524 | cg19193931 | SIM2;SIM2     | 21 | 0.0382926  | 0.831941666 |
| -0.1442043 | cg21697851 | SIM2;SIM2     | 21 | 0.00185558 | 0.719081866 |
| -0.1423269 | cg02553516 | SIM2;SIM2     | 21 | 0.00854671 | 0.79585496  |
| -0.1241225 | cg22711869 | SIM2;SIM2     | 21 | 0.03189023 | 0.829887856 |
| -0.2350847 | cg22289831 | SIM2;SIM2     | 21 | 0.00516536 | 0.61833138  |
| -0.2257716 | cg01090834 | SIM2;SIM2     | 21 | 0.00954345 | 0.759901716 |
| -0.1703531 | cg27248980 | SIM2;SIM2     | 21 | 0.00758458 | 0.608597015 |
| -0.1373563 | cg02701080 | SIM2;SIM2     | 21 | 0.01221847 | 0.711237261 |
| -0.1223153 | cg15750546 | SIM2;SIM2     | 21 | 0.00872019 | 0.691817741 |

|            |            |              |    |            |             |
|------------|------------|--------------|----|------------|-------------|
| -0.1157365 | cg08066129 | SIM2;SIM2    | 21 | 0.00034583 | 0.690981303 |
| -0.1051744 | cg19498960 | SIM2;SIM2    | 21 | 5.07E-05   | 0.597174222 |
| -0.1101514 | cg07615087 | SIM2;SIM2    | 21 | 0.00017209 | 0.769271277 |
| -0.1377787 | cg10456990 | SIM2;SIM2    | 21 | 4.07E-05   | 0.693366479 |
| -0.1111696 | cg00698204 | SIM2;SIM2    | 21 | 0.00012122 | 0.805226611 |
| -0.1130074 | cg24301930 | SIPA1;SIPA1  | 11 | 0.00609815 | 0.854278544 |
| -0.1434455 | cg11803771 | SIPA1;SIPA1  | 11 | 0.04277022 | 0.780294494 |
| -0.1341279 | cg04466898 | SIPA1;SIPA1; | 11 | 0.01495012 | 0.733569139 |
| -0.2341363 | cg14972228 | SIPA1L3      | 19 | 0.00971346 | 0.364330945 |
| -0.1725801 | cg25799433 | SIRPB1;SIRPE | 20 | 0.00040403 | 0.295557521 |
| -0.1609125 | cg07571344 | SIRPB2;SIRPE | 20 | 0.00709912 | 0.807757291 |
| -0.1452463 | cg11934819 | SIRPB2;SIRPE | 20 | 0.00599741 | 0.693149913 |
| -0.1377187 | cg24757937 | SIX1         | 14 | 0.01202884 | 0.754100239 |
| -0.1029414 | cg10397765 | SIX1         | 14 | 0.03751849 | 0.420404057 |
| -0.1411547 | cg05106502 | SKAP1;SKAP1  | 17 | 0.003325   | 0.644458179 |
| -0.128519  | cg26017930 | SKI          | 1  | 0.00799312 | 0.465110857 |
| -0.2973163 | cg10404697 | SKIV2L       | 6  | 0.04813947 | 0.81773197  |
| -0.1227547 | cg06340367 | SLA2;SLA2    | 20 | 0.04315723 | 0.530243822 |
| -0.1105309 | cg08495185 | SLA2;SLA2    | 20 | 0.00015136 | 0.318816871 |
| -0.1918613 | cg15844596 | SLA2;SLA2    | 20 | 0.00686367 | 0.601399144 |
| -0.1114149 | cg03841065 | SLA2;SLA2    | 20 | 0.0012815  | 0.539993518 |
| -0.1637466 | cg07598052 | SLA2;SLA2    | 20 | 0.0004169  | 0.552029058 |
| -0.1303972 | cg21829239 | SLAMF1       | 1  | 0.03173623 | 0.611538036 |
| -0.1261728 | cg01710351 | SLAMF1       | 1  | 0.02094374 | 0.770685526 |
| -0.1111478 | cg18881723 | SLAMF1;SLAF  | 1  | 0.04872162 | 0.680208885 |
| -0.1770872 | cg07837085 | SLAMF7       | 1  | 0.00350153 | 0.744434275 |
| -0.1544203 | cg04275881 | SLAMF8       | 1  | 0.00043245 | 0.445319763 |
| -0.15028   | cg21301505 | SLAMF8;SLAF  | 1  | 0.02218888 | 0.56997904  |
| -0.190869  | cg06764092 | SLAMF8;SLAF  | 1  | 0.00122333 | 0.629639847 |
| -0.184522  | cg07625783 | SLAMF8;SLAF  | 1  | 0.00328902 | 0.533326223 |
| -0.1834354 | cg26417912 | SLAMF9;SLAF  | 1  | 0.03188504 | 0.678722064 |
| -0.1750431 | cg18312429 | SLC10A2;SLC  | 13 | 0.0211013  | 0.700365607 |
| -0.1736981 | cg19123916 | SLC10A4      | 4  | 0.03679178 | 0.457626248 |
| -0.1341206 | cg18464823 | SLC12A6;SLC  | 15 | 0.01230191 | 0.715429016 |
| -0.1413817 | cg21946374 | SLC12A7      | 5  | 0.04317643 | 0.813092531 |
| -0.1266599 | cg20765441 | SLC17A2      | 6  | 0.00047645 | 0.752118102 |
| -0.1126386 | cg13599248 | SLC17A5      | 6  | 0.02979022 | 0.538507572 |
| -0.1470809 | cg11742202 | SLC17A5      | 6  | 0.00011155 | 0.608368867 |
| -0.1092874 | cg21518089 | SLC17A6      | 11 | 0.00023544 | 0.28261827  |
| -0.1013435 | cg17298751 | SLC17A6      | 11 | 0.00427555 | 0.616020912 |
| -0.1241219 | cg15520443 | SLC18A2      | 10 | 0.02497333 | 0.484913961 |
| -0.184906  | cg27368243 | SLC19A1      | 21 | 0.0259464  | 0.446308195 |
| -0.1055238 | cg08258650 | SLC1A2       | 11 | 0.00702829 | 0.650279761 |
| -0.1139819 | cg01823958 | SLC1A7       | 1  | 0.03291272 | 0.523986439 |
| -0.1025674 | cg00532936 | SLC1A7       | 1  | 0.02455499 | 0.646103304 |
| -0.1018696 | cg18105725 | SLC22A1;SLC  | 6  | 0.01335615 | 0.602908135 |

|            |            |             |    |            |             |
|------------|------------|-------------|----|------------|-------------|
| -0.1219253 | cg23190089 | SLC22A18AS; | 11 | 0.00087971 | 0.255220758 |
| -0.120033  | cg18458509 | SLC22A18AS; | 11 | 0.00297432 | 0.549524562 |
| -0.1340541 | cg10513992 | SLC22A23;SL | 6  | 0.00999057 | 0.905241167 |
| -0.163927  | cg15020894 | SLC22A3     | 6  | 0.02352596 | 0.590338377 |
| -0.1388901 | cg19040266 | SLC22A5     | 5  | 0.0435542  | 0.396455662 |
| -0.1365015 | cg19358520 | SLC22A6;SLC | 11 | 0.00944461 | 0.749582556 |
| -0.120205  | cg17945323 | SLC22A8     | 11 | 0.01326514 | 0.726542791 |
| -0.1697298 | cg15572436 | SLC22A8     | 11 | 0.00860385 | 0.460297872 |
| -0.1578136 | cg16146033 | SLC22A8     | 11 | 0.0013554  | 0.316014853 |
| -0.1669222 | cg11107966 | SLC24A4;SLC | 14 | 0.00271886 | 0.437242875 |
| -0.1478445 | cg19811934 | SLC24A4;SLC | 14 | 0.00038862 | 0.610043319 |
| -0.1282699 | cg23558213 | SLC25A17    | 22 | 0.0184798  | 0.345832913 |
| -0.134545  | cg05964212 | SLC25A20    | 3  | 0.032781   | 0.803228251 |
| -0.2072191 | cg05043627 | SLC25A29    | 14 | 0.00057145 | 0.251692141 |
| -0.1529988 | cg11088051 | SLC25A3;SLC | 12 | 0.00935374 | 0.501588454 |
| -0.2289692 | cg18865990 | SLC25A30    | 13 | 0.04578625 | 0.766331199 |
| -0.1177487 | cg07659624 | SLC25A37    | 8  | 0.02326767 | 0.683978093 |
| -0.1816384 | cg26365742 | SLC25A40    | 7  | 0.00079296 | 0.467229629 |
| -0.1112138 | cg04996020 | SLC26A3     | 7  | 0.01094288 | 0.787854526 |
| -0.1044901 | cg04292976 | SLC26A9;SLC | 1  | 0.04664156 | 0.610110826 |
| -0.1616984 | cg09852221 | SLC26A9;SLC | 1  | 0.00400545 | 0.655177324 |
| -0.1950305 | cg05028948 | SLC27A2;SLC | 15 | 0.01463671 | 0.806329166 |
| -0.1731877 | cg00421624 | SLC27A3     | 1  | 0.01642456 | 0.711657079 |
| -0.1470855 | cg11452354 | SLC29A1;SLC | 6  | 0.00124012 | 0.343487697 |
| -0.1856463 | cg17217665 | SLC29A1;SLC | 6  | 0.00101776 | 0.504152281 |
| -0.1380339 | cg25602242 | SLC2A5      | 1  | 0.00191872 | 0.72390469  |
| -0.126544  | cg04901835 | SLC2A5;SLC2 | 1  | 0.01776729 | 0.258034302 |
| -0.1241762 | cg25788793 | SLC2A9      | 4  | 0.00612411 | 0.384516042 |
| -0.2126565 | cg14959260 | SLC2A9;SLC2 | 4  | 0.02818997 | 0.749206274 |
| -0.1194648 | cg03048902 | SLC35D3     | 6  | 0.04235037 | 0.671871365 |
| -0.1910497 | cg06567290 | SLC37A4;SLC | 11 | 0.00408183 | 0.523327745 |
| -0.1694637 | cg21563683 | SLC38A2     | 12 | 0.00302538 | 0.542015147 |
| -0.1929581 | cg11331445 | SLC38A4;SLC | 12 | 0.01232798 | 0.245748528 |
| -0.1879084 | cg25067702 | SLC39A11;SL | 17 | 0.00290846 | 0.385045415 |
| -0.1306909 | cg11761483 | SLC39A11;SL | 17 | 0.03108501 | 0.641613747 |
| -0.1021714 | cg04204452 | SLC43A2     | 17 | 0.00427075 | 0.766134723 |
| -0.1255046 | cg22284058 | SLC45A4     | 8  | 0.0322257  | 0.703406505 |
| -0.1305442 | cg06121226 | SLC4A4;SLC4 | 4  | 0.00026318 | 0.597911477 |
| -0.1696913 | cg15972506 | SLC6A1      | 3  | 0.01306633 | 0.683098516 |
| -0.1472885 | cg18170229 | SLC6A12;SLC | 12 | 0.0171449  | 0.443467215 |
| -0.1368631 | cg03139377 | SLC6A12;SLC | 12 | 0.0208505  | 0.51626085  |
| -0.1042374 | cg01629545 | SLC6A18     | 5  | 0.02316567 | 0.667403339 |
| -0.1377426 | cg07010687 | SLC6A19     | 5  | 0.02036909 | 0.712140336 |
| -0.1352304 | cg24756227 | SLC6A3      | 5  | 1.72E-05   | 0.353747738 |
| -0.1034455 | cg10586672 | SLC6A6;SLC6 | 3  | 0.04037287 | 0.724984783 |
| -0.1013583 | cg15155209 | SLC6A6;SLC6 | 3  | 0.02183421 | 0.462637852 |

|            |            |             |    |            |             |
|------------|------------|-------------|----|------------|-------------|
| -0.288683  | cg16032408 | SLC6A6;SLC6 | 3  | 0.01119064 | 0.623116053 |
| -0.135505  | cg15454698 | SLC6A6;SLC6 | 3  | 0.00202997 | 0.563358345 |
| -0.1288026 | cg08631357 | SLC6A7      | 5  | 0.02337743 | 0.631406772 |
| -0.1393961 | cg02207200 | SLC7A2      | 8  | 0.00290472 | 0.486628162 |
| -0.1132721 | cg08780166 | SLC8A1;SLC8 | 2  | 0.02477701 | 0.407022708 |
| -0.1010136 | cg19015847 | SLC8A1;SLC8 | 2  | 0.01017142 | 0.77524602  |
| -0.1284062 | cg00190355 | SLC9A3      | 5  | 0.00203998 | 0.564156221 |
| -0.1732636 | cg25945642 | SLC9A9      | 3  | 0.01981836 | 0.745062625 |
| -0.1502827 | cg13408795 | SLC9A9      | 3  | 0.01791331 | 0.685397374 |
| -0.1232862 | cg27614723 | SLCO3A1;SLC | 15 | 0.00361918 | 0.614978453 |
| -0.1133306 | cg27132471 | SLCO3A1;SLC | 15 | 0.00079617 | 0.21310961  |
| -0.1056992 | cg22260869 | SLCO3A1;SLC | 15 | 0.00208415 | 0.770065952 |
| -0.2269561 | cg02107844 | SLCO3A1;SLC | 15 | 0.00210851 | 0.508451947 |
| -0.1531537 | cg12864568 | SLCO4C1     | 5  | 0.00436701 | 0.3622279   |
| -0.160221  | cg18193259 | SLIT1       | 10 | 0.01886003 | 0.59148587  |
| -0.1448288 | cg07290920 | SLIT2       | 4  | 0.01261404 | 0.665361901 |
| -0.1129835 | cg23480341 | SLPI        | 20 | 0.00589897 | 0.242279436 |
| -0.1411184 | cg12966875 | SLPI        | 20 | 0.00082372 | 0.574305199 |
| -0.1854467 | cg25594736 | SMAD3       | 15 | 0.00963967 | 0.604449257 |
| -0.2147211 | cg10017293 | SMAGP;DAZ1  | 12 | 0.02330566 | 0.670543605 |
| -0.1417581 | cg26042300 | SMAP2       | 1  | 0.01675637 | 0.220408143 |
| -0.1305151 | cg26061357 | SMARCD3;SM  | 7  | 0.00618397 | 0.727801968 |
| -0.1908793 | cg00700039 | SMCHD1      | 18 | 0.00908821 | 0.696720834 |
| -0.2543098 | cg26927232 | SMG6;SMG6   | 17 | 0.01591096 | 0.855446496 |
| -0.1405492 | cg15816464 | SMG6;SMG6   | 17 | 0.00261306 | 0.582596896 |
| -0.1278215 | cg07058377 | SMG6;SMG6   | 17 | 0.01168792 | 0.437995745 |
| -0.123716  | cg23403980 | SMG6;SMG6   | 17 | 0.003013   | 0.539471444 |
| -0.1423592 | cg02858512 | SMG6;SMG6   | 17 | 0.00312129 | 0.693819117 |
| -0.1170732 | cg05509228 | SMOC2;SMO   | 6  | 0.011162   | 0.645647333 |
| -0.1167407 | cg18101028 | SMR3A       | 4  | 0.02018742 | 0.847241846 |
| -0.25344   | cg01720228 | SMTNL2;SMI  | 17 | 0.03380893 | 0.545958189 |
| -0.141678  | cg24407596 | SMURF1;SMI  | 7  | 0.00545723 | 0.786936762 |
| -0.1399325 | cg25025181 | SMYD3;SMYI  | 1  | 0.02737852 | 0.860552938 |
| -0.2778331 | cg01966878 | SNCA;SNCA;S | 4  | 0.00814686 | 0.590104497 |
| -0.2285404 | cg11308170 | SNORA1;SNC  | 11 | 0.0086808  | 0.728237525 |
| -0.192995  | cg16490124 | SNORA14B;T  | 1  | 0.03590084 | 0.22046902  |
| -0.183628  | cg23792952 | SNORD115-1  | 15 | 0.00152272 | 0.359410615 |
| -0.1812185 | cg22407942 | SNORD93     | 7  | 0.02737301 | 0.444560189 |
| -0.1749383 | cg03906075 | SNORD93     | 7  | 0.00470162 | 0.843158937 |
| -0.1648861 | cg22259765 | SNRPN;SNRP  | 15 | 0.01473459 | 0.298629337 |
| -0.149455  | cg07770866 | SNTB1       | 8  | 0.00037773 | 0.186523959 |
| -0.1482122 | cg05472059 | SNTG2       | 2  | 0.01061799 | 0.6173166   |
| -0.1426522 | cg07196571 | SNX22       | 15 | 0.01967367 | 0.767129288 |
| -0.1372114 | cg22208536 | SNX25       | 4  | 0.01439578 | 0.441700752 |
| -0.1366101 | cg19133466 | SNX29       | 16 | 0.02209109 | 0.849075294 |
| -0.1325233 | cg20710635 | SNX3;SNX3   | 6  | 0.00215079 | 0.331720439 |

|            |            |             |    |            |             |
|------------|------------|-------------|----|------------|-------------|
| -0.1300752 | cg20465954 | SOAT2       | 12 | 0.00325322 | 0.547619937 |
| -0.1256112 | cg13096007 | SOD3        | 4  | 0.00478875 | 0.651207156 |
| -0.1228819 | cg27312979 | SORBS1;SORI | 10 | 0.00347811 | 0.81619078  |
| -0.1226033 | cg16177556 | SORBS2      | 4  | 0.01937419 | 0.382799805 |
| -0.1208263 | cg17006136 | SORBS2;SORI | 4  | 0.01539401 | 0.787969024 |
| -0.117871  | cg23836747 | SORBS2;SORI | 4  | 0.01344481 | 0.742003118 |
| -0.1113137 | cg10411272 | SORBS2;SORI | 4  | 0.03681634 | 0.602825564 |
| -0.109123  | cg20365580 | SORBS3      | 8  | 0.00263745 | 0.714587465 |
| -0.1052851 | cg20729813 | SORCS2      | 4  | 0.00237185 | 0.529481196 |
| -0.1038255 | cg10671830 | SORCS2      | 4  | 0.02919514 | 0.856164336 |
| -0.1036246 | cg05573434 | SORCS2      | 4  | 0.01514852 | 0.650315902 |
| -0.2496582 | cg22357679 | SORCS2      | 4  | 0.01364655 | 0.508142944 |
| -0.2768093 | cg00387964 | SORCS2      | 4  | 0.01069746 | 0.783146171 |
| -0.1616305 | cg04471151 | SORCS3      | 10 | 0.03055487 | 0.322285601 |
| -0.1910692 | cg14239983 | SORL1       | 11 | 0.0038687  | 0.309894677 |
| -0.1331943 | cg03055520 | SORL1       | 11 | 0.00674199 | 0.756542394 |
| -0.1241563 | cg17510957 | SORL1       | 11 | 0.01756936 | 0.733131611 |
| -0.1326875 | cg05075579 | SORL1       | 11 | 0.00048643 | 0.744186341 |
| -0.1561236 | cg11287987 | SOST        | 17 | 0.00566325 | 0.336592395 |
| -0.1281466 | cg15721584 | SOX2OT      | 3  | 0.0381182  | 0.861425591 |
| -0.1123533 | cg10825530 | SOX6;SOX6,S | 11 | 0.01460449 | 0.780146203 |
| -0.1346107 | cg14992524 | SOX7        | 8  | 0.01411676 | 0.683689592 |
| -0.1069762 | cg22272840 | SOX7        | 8  | 0.00150232 | 0.679476241 |
| -0.1318356 | cg11606261 | SP1;SP1     | 12 | 0.00469002 | 0.592846507 |
| -0.1312585 | cg13278004 | SP140L      | 2  | 0.00082168 | 0.242811969 |
| -0.1065351 | cg24044052 | SP140L      | 2  | 0.00570517 | 0.445933671 |
| -0.1026052 | cg25095994 | SP140L      | 2  | 0.0043771  | 0.439983866 |
| -0.1283583 | cg20556951 | SP6         | 17 | 0.00452553 | 0.737105836 |
| -0.1445169 | cg17733447 | SP6         | 17 | 0.01508623 | 0.732652183 |
| -0.1221299 | cg08974244 | SP6         | 17 | 0.00284039 | 0.46696527  |
| -0.1010403 | cg05730975 | SPAG16      | 2  | 0.00988647 | 0.541101741 |
| -0.1219018 | cg09282654 | SPAM1;SPAM  | 7  | 0.00710376 | 0.434439956 |
| -0.1236195 | cg05660881 | SPATA13;SPA | 13 | 0.01228437 | 0.845867308 |
| -0.1174865 | cg15826426 | SPATA8      | 15 | 0.00522133 | 0.8345407   |
| -0.1813778 | cg20520888 | SPATC1;SPAT | 8  | 0.02169872 | 0.586023543 |
| -0.1741648 | cg14669524 | SPATS1      | 6  | 0.02724273 | 0.516373269 |
| -0.1496661 | cg14774117 | SPATS1      | 6  | 0.00515849 | 0.512899782 |
| -0.1344411 | cg06712013 | SPATS2      | 12 | 0.005904   | 0.715427568 |
| -0.1107568 | cg17285709 | SPEG        | 2  | 0.03911232 | 0.836808714 |
| -0.1737218 | cg01727145 | SPEG        | 2  | 0.00656295 | 0.797098879 |
| -0.2120424 | cg16440561 | SPEG        | 2  | 0.00219403 | 0.876515277 |
| -0.137907  | cg25008858 | SPEG        | 2  | 0.01195297 | 0.527266698 |
| -0.1023172 | cg03394909 | SPEG        | 2  | 0.00369365 | 0.570226005 |
| -0.1751573 | cg23101680 | SPERT       | 13 | 0.00669998 | 0.618160004 |
| -0.1012631 | cg00214970 | SPHKAP;SPHI | 2  | 0.00961974 | 0.663069245 |
| -0.1790898 | cg21579147 | SPINK2      | 4  | 0.01346    | 0.436656035 |



|            |            |              |    |            |             |
|------------|------------|--------------|----|------------|-------------|
| -0.1293226 | cg20734569 | SPINK8       | 3  | 0.00901402 | 0.386794008 |
| -0.103372  | cg19261810 | SPINT2;SPIN1 | 19 | 0.02934235 | 0.600638306 |
| -0.2385072 | cg08480068 | SPN;SPN      | 16 | 0.00860922 | 0.819836908 |
| -0.2197264 | cg01681367 | SPN;SPN      | 16 | 0.00393952 | 0.816051474 |
| -0.2179814 | cg02030929 | SPN;SPN      | 16 | 0.00705592 | 0.75581345  |
| -0.1916353 | cg10126903 | SPN;SPN      | 16 | 0.02350951 | 0.502807309 |
| -0.1702621 | cg23083984 | SPN;SPN      | 16 | 0.00521231 | 0.492998454 |
| -0.1633972 | cg16644366 | SPN;SPN      | 16 | 0.00051312 | 0.438197099 |
| -0.1599381 | cg26691434 | SPN;SPN      | 16 | 0.02021853 | 0.707416526 |
| -0.1556343 | cg18998172 | SPOCK1       | 5  | 0.01093528 | 0.694902389 |
| -0.1498171 | cg20261167 | SPP1;SPP1;Sf | 4  | 0.00396286 | 0.429453453 |
| -0.1456138 | cg06101324 | SPRR1A       | 1  | 0.00031202 | 0.436352044 |
| -0.125258  | cg00891995 | SPRR2C       | 1  | 0.02786663 | 0.475933962 |
| -0.1075274 | cg02713162 | SPRY4;SPRY4  | 5  | 0.00263745 | 0.648575481 |
| -0.1030171 | cg07200877 | SPRYD5       | 11 | 0.0023929  | 0.395298358 |
| -0.1005847 | cg11622008 | SPSB4        | 3  | 0.00416887 | 0.620328958 |
| -0.2301445 | cg24608504 | SPTBN1       | 2  | 0.03619915 | 0.876706066 |
| -0.2277521 | cg24544082 | SPTBN1       | 2  | 0.02594772 | 0.833997481 |
| -0.1815263 | cg24171453 | SPTLC2       | 14 | 0.00613289 | 0.655538177 |
| -0.1763247 | cg21107103 | SPTY2D1      | 11 | 0.04976292 | 0.765615903 |
| -0.1542729 | cg01626885 | SQRDL        | 15 | 0.01110617 | 0.567248023 |
| -0.1362635 | cg19701531 | SRCRB4D;ZP3  | 7  | 0.02473698 | 0.383317107 |
| -0.1226391 | cg27407935 | SREBF1;SREB  | 17 | 0.03042257 | 0.340160275 |
| -0.1222771 | cg16928487 | SREBF1;SREB  | 17 | 0.0069009  | 0.449871651 |
| -0.1161404 | cg01668352 | SRGAP1       | 12 | 0.00436081 | 0.855101638 |
| -0.1011373 | cg05733104 | SRGAP3;SRG   | 3  | 0.01719055 | 0.839169763 |
| -0.1007004 | cg02851793 | SRGN         | 10 | 0.03447507 | 0.704577495 |
| -0.1006697 | cg27395226 | SRPK2        | 7  | 0.02950243 | 0.793779005 |
| -0.1475145 | cg09895325 | SRRM1        | 1  | 0.00200411 | 0.496337169 |
| -0.185847  | cg07090356 | SS18;SS18    | 18 | 0.04245023 | 0.648332011 |
| -0.1405194 | cg19963589 | SSBP3;SSBP3  | 1  | 0.00627842 | 0.711674797 |
| -0.120165  | cg01996567 | SSPO         | 7  | 0.03737964 | 0.457237888 |
| -0.1191847 | cg24119990 | SST          | 3  | 0.0386161  | 0.670281914 |
| -0.1091532 | cg22110158 | ST14         | 11 | 0.01300324 | 0.676876729 |
| -0.1082593 | cg09586924 | ST14         | 11 | 0.00035151 | 0.392285888 |
| -0.1061951 | cg18980148 | ST3GAL1;ST3  | 8  | 0.00420866 | 0.537751205 |
| -0.100246  | cg25723459 | ST3GAL4      | 11 | 0.01497823 | 0.749814804 |
| -0.2312424 | cg24969820 | ST3GAL6      | 3  | 0.00502511 | 0.538751813 |
| -0.1686296 | cg19019345 | ST5          | 11 | 0.00920513 | 0.724728167 |
| -0.1617401 | cg23195547 | ST5;ST5;ST5  | 11 | 0.04078977 | 0.630008965 |
| -0.1544956 | cg08726522 | ST5;ST5;ST5  | 11 | 0.00301135 | 0.295758848 |
| -0.138453  | cg26550194 | ST6GALNAC1   | 17 | 0.02233218 | 0.631794707 |
| -0.1212362 | cg07168526 | ST7;ST7      | 7  | 0.00139778 | 0.834847608 |
| -0.1187865 | cg14871870 | ST8SIA1      | 12 | 0.00280079 | 0.704389319 |
| -0.1155531 | cg02369052 | ST8SIA2      | 15 | 0.00589639 | 0.740628285 |
| -0.1149699 | cg02980023 | STAB1        | 3  | 0.01751398 | 0.56810055  |

|            |            |             |    |            |             |
|------------|------------|-------------|----|------------|-------------|
| -0.1205027 | cg24112733 | STARD3NL    | 7  | 0.00044209 | 0.436400912 |
| -0.1663835 | cg17833746 | STAT3;STAT3 | 17 | 0.02281537 | 0.861282792 |
| -0.110327  | cg24718015 | STAT3;STAT3 | 17 | 0.00311671 | 0.645482632 |
| -0.1822352 | cg16777510 | STAT5A      | 17 | 0.00035687 | 0.465018419 |
| -0.1524312 | cg18651932 | STBD1       | 4  | 0.02051741 | 0.417350592 |
| -0.2229753 | cg25440680 | STBD1       | 4  | 0.00314809 | 0.469806031 |
| -0.116754  | cg07719679 | STEAP4      | 7  | 0.00012312 | 0.192122031 |
| -0.1111911 | cg14143752 | STIM1       | 11 | 0.00351121 | 0.812563899 |
| -0.1080711 | cg14394126 | STIM2;STIM2 | 4  | 0.02621259 | 0.68056995  |
| -0.1049198 | cg25650256 | STK10       | 5  | 0.00783466 | 0.330625171 |
| -0.173913  | cg21920221 | STK10       | 5  | 0.01018454 | 0.746046431 |
| -0.12975   | cg14462124 | STK17B      | 2  | 0.00415102 | 0.834409752 |
| -0.1008637 | cg18233544 | STK32C      | 10 | 0.00510754 | 0.638680443 |
| -0.1824054 | cg12237948 | STK35       | 20 | 0.00194303 | 0.4248397   |
| -0.1632379 | cg17104026 | STK4        | 20 | 0.00278385 | 0.5486282   |
| -0.1246824 | cg27326514 | STMN2       | 8  | 0.00331104 | 0.488091997 |
| -0.1196749 | cg07496457 | STOX2       | 4  | 0.02027859 | 0.800703041 |
| -0.1169085 | cg01712428 | STX1A;STX1A | 7  | 0.00240411 | 0.393305471 |
| -0.147476  | cg01631215 | SUCLG2      | 3  | 0.04322863 | 0.828697413 |
| -0.1018291 | cg07073960 | SULF1;SULF1 | 8  | 0.00328272 | 0.35039885  |
| -0.1169364 | cg04845579 | SULF1;SULF1 | 8  | 0.04976166 | 0.545672649 |
| -0.1417939 | cg02283643 | SULF1;SULF1 | 8  | 0.03424379 | 0.285985581 |
| -0.1931458 | cg12181083 | SULF1;SULF1 | 8  | 0.01062724 | 0.528726065 |
| -0.1331783 | cg22472023 | SULT2A1;SUL | 19 | 0.00545547 | 0.325137068 |
| -0.1187104 | cg10262032 | SULT2B1;SUL | 19 | 0.0099619  | 0.487074084 |
| -0.1147035 | cg01946401 | SUPT3H;SUP  | 6  | 0.01627456 | 0.777621374 |
| -0.1114664 | cg03940484 | SV2B;SV2B   | 15 | 8.27E-05   | 0.397037654 |
| -0.1021729 | cg00593008 | SV2C        | 5  | 0.02904297 | 0.604880871 |
| -0.1102988 | cg25661049 | SV2C        | 5  | 0.00329271 | 0.623716813 |
| -0.102528  | cg05814312 | SVIL;SVIL   | 10 | 0.01722743 | 0.42210111  |
| -0.2339702 | cg06537575 | SVOPL;SVOPI | 7  | 0.03564816 | 0.70651925  |
| -0.2546526 | cg17173451 | SVOPL;SVOPI | 7  | 0.00566919 | 0.581826918 |
| -0.1461187 | cg09976669 | SWAP70      | 11 | 0.04486967 | 0.529227296 |
| -0.2086639 | cg03310376 | SYN2        | 3  | 0.01061017 | 0.472065783 |
| -0.2020328 | cg14994183 | SYN2;SYN2   | 3  | 0.00760769 | 0.305848357 |
| -0.1470678 | cg20476019 | SYN3;SYN3;S | 22 | 0.00238262 | 0.695817775 |
| -0.1021678 | cg05342835 | SYNC;SYNC   | 1  | 0.00892209 | 0.708183172 |
| -0.1216338 | cg14079545 | SYNGAP1     | 6  | 0.02331988 | 0.678696758 |
| -0.1779444 | cg03467087 | SYNJ2       | 6  | 0.01112347 | 0.683114084 |
| -0.1288975 | cg12002139 | SYNJ2       | 6  | 0.00667522 | 0.783319615 |
| -0.145108  | cg11569478 | SYNPO2;SYN  | 4  | 0.02049237 | 0.661041511 |
| -0.1136111 | cg20515580 | SYT12       | 11 | 0.0037608  | 0.353713023 |
| -0.1323481 | cg09597390 | SYT9        | 11 | 0.02749431 | 0.625756516 |
| -0.1569277 | cg08122156 | SYT9        | 11 | 0.02685208 | 0.841666144 |
| -0.1166495 | cg21672572 | SYT9        | 11 | 0.01315151 | 0.435619473 |
| -0.1633168 | cg15957341 | SYT9        | 11 | 0.00112164 | 0.466743265 |

|            |            |             |    |            |             |
|------------|------------|-------------|----|------------|-------------|
| -0.1520416 | cg12691330 | SYTL3       | 6  | 0.02105796 | 0.833698276 |
| -0.1091484 | cg11065271 | SYTL3       | 6  | 0.01357933 | 0.69248824  |
| -0.3526755 | cg03003434 | SYTL3       | 6  | 0.01290849 | 0.83844657  |
| -0.2154348 | cg00370106 | SYTL3;SYTL3 | 6  | 0.02380976 | 0.503962853 |
| -0.17732   | cg10657228 | T-SP1       | 8  | 0.00658735 | 0.583353218 |
| -0.1276422 | cg14284618 | TACC1       | 8  | 0.00253125 | 0.308773457 |
| -0.1204782 | cg15299510 | TACC1       | 8  | 0.03474546 | 0.461602067 |
| -0.1119273 | cg11888747 | TADA3       | 3  | 0.00492318 | 0.747700249 |
| -0.1095179 | cg15217044 | TAGAP;TAGA  | 6  | 0.00078633 | 0.431262128 |
| -0.1004609 | cg05262335 | TAGAP;TAGA  | 6  | 0.0068169  | 0.551517298 |
| -0.1427165 | cg22339338 | TAGLN2      | 1  | 0.01246317 | 0.300896064 |
| -0.1333156 | cg15641364 | TAGLN2      | 1  | 0.00446837 | 0.691204989 |
| -0.1877166 | cg25709789 | TAOK1       | 17 | 0.00707175 | 0.773021277 |
| -0.129159  | cg17626301 | TAP1        | 6  | 0.00910392 | 0.778852985 |
| -0.172379  | cg10666909 | TAP1        | 6  | 0.00476782 | 0.565144571 |
| -0.136821  | cg02756056 | TAP1;PSMB8  | 6  | 0.00505441 | 0.624764171 |
| -0.1223794 | cg13165140 | TAP1;PSMB8  | 6  | 0.04886364 | 0.766087577 |
| -0.2451065 | cg12253437 | TAP1;PSMB8  | 6  | 0.0217048  | 0.807064362 |
| -0.1531854 | cg05693489 | TAP1;PSMB8  | 6  | 0.02702235 | 0.792339035 |
| -0.104664  | cg05592483 | TAP2;TAP2   | 6  | 0.0372549  | 0.417915001 |
| -0.1115218 | cg24131538 | TAPBPL      | 12 | 0.00259708 | 0.550380213 |
| -0.1433761 | cg15605096 | TAS1R2      | 1  | 0.01964721 | 0.516143155 |
| -0.1578163 | cg05862438 | TAS2R40     | 7  | 0.00920094 | 0.789916954 |
| -0.1125634 | cg10251217 | TAT         | 16 | 0.00790963 | 0.815317638 |
| -0.1261397 | cg11791526 | TBC1D10C    | 11 | 0.00197797 | 0.500555788 |
| -0.1030641 | cg00862408 | TBC1D10C    | 11 | 8.11E-05   | 0.608099303 |
| -0.1527021 | cg14647287 | TBC1D14;TBK | 4  | 0.0273803  | 0.805154722 |
| -0.1455864 | cg15437231 | TBC1D15;TBK | 12 | 0.00866003 | 0.536141817 |
| -0.15934   | cg02348119 | TBC1D16     | 17 | 0.00583804 | 0.826163044 |
| -0.1145899 | cg13709496 | TBC1D2      | 9  | 0.04886373 | 0.722970716 |
| -0.1495519 | cg20059377 | TBC1D2B;TBK | 15 | 0.00705765 | 0.354160538 |
| -0.1079409 | cg19016694 | TBCD        | 17 | 0.01673597 | 0.712915031 |
| -0.1462013 | cg07888957 | TBCD        | 17 | 0.01138656 | 0.580067023 |
| -0.1768354 | cg15081723 | TBCE;TBCE   | 1  | 0.01756936 | 0.366658093 |
| -0.1223946 | cg04254487 | TBPL1       | 6  | 0.02605996 | 0.752505083 |
| -0.1013304 | cg14557487 | TBR1        | 2  | 0.00089229 | 0.485676001 |
| -0.1288948 | cg04679902 | TBX1;TBX1;T | 22 | 0.02100902 | 0.621538584 |
| -0.1462028 | cg27027242 | TBX2        | 17 | 0.01976609 | 0.720117633 |
| -0.1218939 | cg01913455 | TBX2        | 17 | 0.01041302 | 0.424399681 |
| -0.1080103 | cg03753391 | TBX2        | 17 | 0.02697039 | 0.620412159 |
| -0.1543346 | cg11631427 | TBX2        | 17 | 0.00449258 | 0.760841379 |
| -0.1185851 | cg10308654 | TBX2        | 17 | 0.00022105 | 0.693252873 |
| -0.1370842 | cg11062079 | TBX4        | 17 | 0.00541486 | 0.769687898 |
| -0.110877  | cg04794141 | TC2N        | 14 | 0.02077378 | 0.325430413 |
| -0.1048277 | cg19903805 | TC2N;TC2N   | 14 | 0.01052231 | 0.86229753  |
| -0.1423831 | cg18805457 | TCERG1;TCF  | 5  | 0.02186618 | 0.816714042 |

|            |            |               |    |            |             |
|------------|------------|---------------|----|------------|-------------|
| -0.1662572 | cg17004653 | TCERG1L       | 10 | 0.0247664  | 0.492591269 |
| -0.1554115 | cg01062443 | TCF3;TCF3     | 19 | 0.00418379 | 0.383447786 |
| -0.1626859 | cg18842107 | TCF7L2;TCF7   | 10 | 0.00539473 | 0.834760423 |
| -0.1523042 | cg03683087 | TCF7L2;TCF7   | 10 | 0.04893451 | 0.250391658 |
| -0.2072066 | cg05402891 | TCL1B;TCL1B   | 14 | 0.02334826 | 0.462434716 |
| -0.1534224 | cg03852551 | TCP10L2       | 6  | 0.00692158 | 0.293725918 |
| -0.1341459 | cg23346134 | TCTA          | 3  | 5.42E-05   | 0.35969767  |
| -0.1703338 | cg02097120 | TDRD10;TDR    | 1  | 5.33E-05   | 0.252455503 |
| -0.1577958 | cg09861057 | TDRD10;TDR    | 1  | 0.03144462 | 0.461290317 |
| -0.2025184 | cg08426066 | TDRD6;TDRD    | 6  | 0.00841933 | 0.63215674  |
| -0.1303263 | cg21198586 | TEAD1         | 11 | 0.00231134 | 0.403929383 |
| -0.1411323 | cg17249224 | TERT;TERT     | 5  | 0.04632843 | 0.675883793 |
| -0.1757344 | cg06768361 | TESC;TESC;TE  | 12 | 0.01930262 | 0.815995709 |
| -0.100241  | cg00864012 | TEX2          | 17 | 0.00259257 | 0.721385463 |
| -0.1089902 | cg00804338 | TFDP1;TFDP1   | 13 | 0.00083664 | 0.203576066 |
| -0.1934516 | cg08053935 | TFEB;TFEB     | 6  | 0.01475177 | 0.455359979 |
| -0.1712395 | cg15339605 | TFEC;TFEC;TF  | 7  | 6.04E-06   | 0.46470176  |
| -0.1203548 | cg11947187 | TG            | 8  | 0.04813254 | 0.52483372  |
| -0.1197702 | cg24804707 | TG;SLA;SLA    | 8  | 0.04790321 | 0.856925889 |
| -0.2095372 | cg08911152 | TG;SLA;SLA    | 8  | 0.01140709 | 0.389531462 |
| -0.1934041 | cg11883141 | TG;SLA;SLA    | 8  | 0.01717877 | 0.636661754 |
| -0.1366599 | cg12136514 | TG;SLA;SLA    | 8  | 0.00547147 | 0.588968281 |
| -0.1347478 | cg27540367 | TGFB1         | 19 | 0.0118102  | 0.748116379 |
| -0.1228531 | cg15735736 | TGFB1         | 19 | 0.01311738 | 0.342122127 |
| -0.1169431 | cg09417692 | TGFBR2;TGFI   | 3  | 0.00522133 | 0.623024052 |
| -0.112154  | cg00857921 | TGFBR3        | 1  | 0.00904863 | 0.557989499 |
| -0.1040451 | cg02061431 | TGFBR3        | 1  | 0.00540796 | 0.51864315  |
| -0.1599018 | cg04204669 | TH;TH;TH      | 11 | 0.02397879 | 0.704185587 |
| -0.1343973 | cg08685909 | TH1L          | 20 | 0.00080174 | 0.421574686 |
| -0.1109036 | cg23105419 | THADA;THAC    | 2  | 0.01111785 | 0.821218766 |
| -0.180232  | cg13869942 | THEM4         | 1  | 0.04423308 | 0.565444553 |
| -0.1350801 | cg11344950 | THEM5;THEM    | 1  | 0.00688915 | 0.755303561 |
| -0.1490206 | cg22134162 | THOC7         | 3  | 0.015009   | 0.29909335  |
| -0.1404068 | cg26648185 | TIAM1         | 21 | 0.01878775 | 0.700985722 |
| -0.1189182 | cg08333616 | TIMD4;TIMD    | 5  | 0.01151368 | 0.468455179 |
| -0.1116038 | cg00466492 | TIMM44;CTX    | 19 | 0.02265371 | 0.582185868 |
| -0.1540045 | cg08282960 | TIMM8B;C11    | 11 | 0.02600333 | 0.859387246 |
| -0.1905784 | cg04397137 | TIMP2         | 17 | 0.04882141 | 0.80691142  |
| -0.1585739 | cg14255824 | TJP2;TJP2;TJF | 9  | 0.00688465 | 0.768850548 |
| -0.1241707 | cg00695112 | TJP2;TJP2;TJF | 9  | 0.016036   | 0.459672844 |
| -0.1068901 | cg07512993 | TK2           | 16 | 0.01063083 | 0.575757711 |
| -0.1058365 | cg02934719 | TK2           | 16 | 0.02912124 | 0.770998886 |
| -0.1546188 | cg10472651 | TK2           | 16 | 0.02102669 | 0.586837054 |
| -0.1349847 | cg00748718 | TKT;TKT;TKT   | 3  | 0.00350029 | 0.628024082 |
| -0.1561681 | cg25840354 | TLR10;TLR10   | 4  | 0.00991042 | 0.389726083 |
| -0.1234784 | cg23039250 | TLR5          | 1  | 0.04882141 | 0.480085628 |

|            |            |            |    |            |             |
|------------|------------|------------|----|------------|-------------|
| -0.1192865 | cg22496559 | TM4SF19    | 3  | 0.00089898 | 0.85509196  |
| -0.1876307 | cg23250593 | TM4SF19    | 3  | 0.03849755 | 0.607743241 |
| -0.1387778 | cg21845080 | TM4SF19    | 3  | 0.03785297 | 0.583544169 |
| -0.1552016 | cg01883662 | TM4SF19    | 3  | 0.00876577 | 0.708954637 |
| -0.1476241 | cg15044270 | TM4SF19    | 3  | 0.0009756  | 0.388106971 |
| -0.1345131 | cg21090033 | TM4SF19    | 3  | 0.00303036 | 0.780648292 |
| -0.1762458 | cg13314965 | TM4SF19    | 3  | 0.00408283 | 0.787185712 |
| -0.1374974 | cg25045893 | TM6SF1;TME | 15 | 0.03338702 | 0.702302941 |
| -0.1837151 | cg02641539 | TM7SF4     | 8  | 0.00650476 | 0.334037232 |
| -0.1085906 | cg04728919 | TMC2       | 20 | 0.00369053 | 0.773488263 |
| -0.1582307 | cg05193435 | TMC2       | 20 | 0.01041503 | 0.638200951 |
| -0.1225509 | cg19056418 | TMC8;TMC6  | 17 | 0.03812836 | 0.596104725 |
| -0.1000623 | cg03190661 | TMC8;TMC6  | 17 | 0.04024685 | 0.639689582 |
| -0.123846  | cg00447208 | TMC8;TMC6; | 17 | 0.04110294 | 0.550555196 |
| -0.1755444 | cg02495760 | TMEM106C;T | 12 | 0.03443115 | 0.556060557 |
| -0.164903  | cg26380116 | TMEM132B   | 12 | 0.00034002 | 0.820486599 |
| -0.1242309 | cg06130322 | TMEM132C   | 12 | 0.01080921 | 0.329822488 |
| -0.1108324 | cg26522894 | TMEM132D   | 12 | 0.03829625 | 0.570426744 |
| -0.1182829 | cg08261450 | TMEM132D   | 12 | 0.00217938 | 0.562296877 |
| -0.1239698 | cg20168964 | TMEM132D   | 12 | 0.00492014 | 0.808690553 |
| -0.1283802 | cg23403099 | TMEM132E   | 17 | 0.03492815 | 0.409370697 |
| -0.1013709 | cg21363348 | TMEM140    | 7  | 0.00341742 | 0.224920632 |
| -0.1093684 | cg09414827 | TMEM140    | 7  | 0.0001566  | 0.263249211 |
| -0.1367396 | cg08016257 | TMEM140    | 7  | 0.00292449 | 0.701966028 |
| -0.1014626 | cg27641628 | TMEM140    | 7  | 0.00022003 | 0.444239934 |
| -0.1319649 | cg07522970 | TMEM140    | 7  | 0.00127538 | 0.572514777 |
| -0.1098168 | cg07972322 | TMEM140;T  | 7  | 0.0012651  | 0.340124348 |
| -0.1893315 | cg06456031 | TMEM140;T  | 7  | 0.00147414 | 0.497625448 |
| -0.1174393 | cg15139596 | TMEM149    | 19 | 0.00652529 | 0.541479478 |
| -0.1112363 | cg16927606 | TMEM149;T  | 19 | 0.00811988 | 0.744712621 |
| -0.1086915 | cg16911583 | TMEM149;U  | 19 | 0.01279661 | 0.740198345 |
| -0.1685487 | cg09169734 | TMEM150B   | 19 | 0.00339721 | 0.319568926 |
| -0.1074825 | cg09470754 | TMEM150B   | 19 | 0.01337007 | 0.750551568 |
| -0.1404556 | cg04706627 | TMEM150B   | 19 | 0.01738054 | 0.515087637 |
| -0.2130388 | cg26681139 | TMEM163    | 2  | 0.01400113 | 0.554771846 |
| -0.1842788 | cg04232128 | TMEM173    | 5  | 0.00038114 | 0.324260987 |
| -0.141503  | cg05385923 | TMEM176B;T | 7  | 0.02932611 | 0.911152182 |
| -0.1256303 | cg08352774 | TMEM181    | 6  | 0.01615666 | 0.668018143 |
| -0.1198462 | cg18396403 | TMEM184B   | 22 | 0.01080286 | 0.703333817 |
| -0.1175424 | cg25921357 | TMEM190    | 19 | 0.03985401 | 0.435802128 |
| -0.1152139 | cg00057240 | TMEM194B   | 2  | 0.02939212 | 0.83645778  |
| -0.112479  | cg00058163 | TMEM200C   | 18 | 0.00757425 | 0.74922002  |
| -0.1078419 | cg10040866 | TMEM202    | 15 | 0.00311714 | 0.456569902 |
| -0.1027917 | cg26906737 | TMEM206    | 1  | 0.02696136 | 0.694511211 |
| -0.1004453 | cg06776976 | TMEM206    | 1  | 0.00740254 | 0.600014727 |
| -0.1819901 | cg19526166 | TMEM232    | 5  | 0.0470724  | 0.613659894 |

|            |            |              |    |            |             |
|------------|------------|--------------|----|------------|-------------|
| -0.1426806 | cg20068209 | TMEM30A;TI   | 6  | 0.00186999 | 0.505898368 |
| -0.1381015 | cg07258715 | TMEM40       | 3  | 0.0105557  | 0.631336824 |
| -0.1310726 | cg01409343 | TMEM49       | 17 | 0.04727316 | 0.500894817 |
| -0.1211901 | cg02782634 | TMEM49       | 17 | 0.03803356 | 0.451636947 |
| -0.1030201 | cg19897979 | TMEM50A      | 1  | 0.03147544 | 0.782530063 |
| -0.1707765 | cg10336925 | TMEM63C      | 14 | 0.01033474 | 0.574975391 |
| -0.253013  | cg07171609 | TMEM64;TM    | 8  | 0.0074227  | 0.673023002 |
| -0.1910162 | cg23313885 | TMEM71;TM    | 8  | 0.03967439 | 0.407288451 |
| -0.1549007 | cg27159719 | TMEM71;TM    | 8  | 0.03662596 | 0.590441705 |
| -0.1233356 | cg14500718 | TMEM79;SM    | 1  | 0.00385295 | 0.34995309  |
| -0.1123629 | cg18973101 | TMEM79;SM    | 1  | 0.0035637  | 0.276217975 |
| -0.1078794 | cg13736811 | TMEM91       | 19 | 0.01186236 | 0.744630139 |
| -0.1913652 | cg12955084 | TMEM91;TM    | 19 | 0.01556292 | 0.763703043 |
| -0.1371403 | cg00488740 | TMIGD2;TMI   | 19 | 0.00494897 | 0.802281362 |
| -0.1568718 | cg11980819 | TMIGD2;TMI   | 19 | 0.00537995 | 0.624554852 |
| -0.1352806 | cg27144670 | TMOD3        | 15 | 0.0035166  | 0.791567328 |
| -0.112793  | cg10973881 | TMOD4        | 1  | 0.01135012 | 0.447241818 |
| -0.1260769 | cg17318719 | TMPRSS4;TV   | 11 | 0.00973682 | 0.451562856 |
| -0.1189463 | cg19498042 | TMPRSS7;TV   | 3  | 0.01494684 | 0.556117901 |
| -0.1273227 | cg10650821 | TNF          | 6  | 0.00525815 | 0.589013819 |
| -0.265844  | cg21222743 | TNF          | 6  | 0.00053596 | 0.369930508 |
| -0.2072281 | cg01569083 | TNF          | 6  | 0.01129228 | 0.583426236 |
| -0.1519042 | cg12681001 | TNF          | 6  | 0.01735214 | 0.498750506 |
| -0.1376595 | cg03037030 | TNF          | 6  | 0.00582365 | 0.457292459 |
| -0.1187886 | cg21370522 | TNF          | 6  | 0.00412517 | 0.64722158  |
| -0.1412627 | cg09918674 | TNFAIP8L1;TI | 19 | 0.00763002 | 0.380705898 |
| -0.1168078 | cg08292569 | TNFRSF10A    | 8  | 0.03106174 | 0.632179285 |
| -0.1361188 | cg18545076 | TNFRSF10C    | 8  | 0.00339608 | 0.527857044 |
| -0.1047568 | cg02368508 | TNFRSF17     | 16 | 0.0048768  | 0.751289295 |
| -0.154541  | cg09247175 | TNFRSF8;TNF  | 1  | 0.00593315 | 0.501438471 |
| -0.2148903 | cg20820107 | TNFRSF8;TNF  | 1  | 0.0010109  | 0.711119158 |
| -0.1697524 | cg14153654 | TNFRSF9      | 1  | 0.02392227 | 0.463795751 |
| -0.1240328 | cg01059398 | TNFSF10      | 3  | 0.02007006 | 0.867288435 |
| -0.1163389 | cg01462856 | TNFSF13B;TN  | 13 | 0.00476213 | 0.404344474 |
| -0.1160194 | cg10362335 | TNFSF14;TNF  | 19 | 0.0098512  | 0.649420266 |
| -0.1042908 | cg10861599 | TNFSF4       | 1  | 0.00741425 | 0.669188908 |
| -0.1560101 | cg26315984 | TNFSF4       | 1  | 0.01051215 | 0.694502874 |
| -0.2148207 | cg16517394 | TNFSF4;TNFS  | 1  | 0.00120921 | 0.350619522 |
| -0.1227656 | cg21439763 | TNFSF4;TNFS  | 1  | 0.00456223 | 0.835752709 |
| -0.1965198 | cg18058230 | TNIK;TNIK;TN | 3  | 0.02456134 | 0.691461296 |
| -0.1049378 | cg13058214 | TNNT3;TNNT   | 11 | 0.01142199 | 0.682196613 |
| -0.1185204 | cg05687083 | TNRC18       | 7  | 0.00032077 | 0.874482002 |
| -0.1094617 | cg02481714 | TNRC6B       | 22 | 0.03877715 | 0.799438832 |
| -0.1252375 | cg12338137 | TNS1         | 2  | 0.03314054 | 0.779328589 |
| -0.1164125 | cg05638589 | TNS3         | 7  | 0.00271758 | 0.865919774 |
| -0.138475  | cg06539391 | TNXB         | 6  | 0.04916765 | 0.706848514 |

|            |            |              |    |            |             |
|------------|------------|--------------|----|------------|-------------|
| -0.1013109 | cg23257604 | TNXB         | 6  | 0.00015136 | 0.192416926 |
| -0.1121098 | cg01188191 | TNXB         | 6  | 0.00535079 | 0.757658164 |
| -0.1239732 | cg13720581 | TNXB;TNXB    | 6  | 8.11E-05   | 0.28522344  |
| -0.1107215 | cg03376089 | TOM1L2;TOM   | 17 | 0.00073692 | 0.779880592 |
| -0.1270877 | cg13473434 | TOMM40L      | 1  | 0.00034002 | 0.245865087 |
| -0.1097713 | cg13987885 | TOMM5;TOM    | 9  | 0.01359936 | 0.602408112 |
| -0.2387876 | cg21435473 | TOP1MT       | 8  | 0.02297465 | 0.694869359 |
| -0.2249313 | cg19003304 | TOX          | 8  | 0.00500347 | 0.719356825 |
| -0.2534005 | cg16970323 | TOX2;TOX2;T  | 20 | 0.01700815 | 0.797214972 |
| -0.1188615 | cg06758255 | TOX3;TOX3    | 16 | 0.03817584 | 0.792992509 |
| -0.1247815 | cg15134583 | TP53BP2;TP5  | 1  | 0.03037929 | 0.809293135 |
| -0.114319  | cg01859616 | TP53I11;TP5  | 11 | 0.0013563  | 0.519092107 |
| -0.15589   | cg19819912 | TP73;TP73;TI | 1  | 0.00277027 | 0.504800979 |
| -0.1087099 | cg14468856 | TPK1;TPK1    | 7  | 0.01416262 | 0.791843065 |
| -0.132704  | cg13740187 | TPM3         | 1  | 0.0419068  | 0.611664714 |
| -0.1160232 | cg16586406 | TPM3         | 1  | 0.01068023 | 0.635198316 |
| -0.106806  | cg12205230 | TPM3         | 1  | 0.00681997 | 0.596315067 |
| -0.1735228 | cg16624210 | TPPP         | 5  | 0.00451559 | 0.349096903 |
| -0.121652  | cg09856467 | TPST2;TPST2  | 22 | 0.00401632 | 0.683904034 |
| -0.1122028 | cg16704530 | TRAF3IP2;TR  | 6  | 0.01719864 | 0.76265859  |
| -0.1023609 | cg20694619 | TRAF3IP3     | 1  | 0.00725131 | 0.678985659 |
| -0.236044  | cg05959508 | TRAF3IP3     | 1  | 0.01158747 | 0.619853543 |
| -0.1081676 | cg22436753 | TRAF3IP3;TR  | 1  | 0.00748219 | 0.804240181 |
| -0.1544351 | cg03218479 | TRAPPC9;TR   | 8  | 0.00282066 | 0.731551094 |
| -0.1011032 | cg22211507 | TRAT1        | 3  | 0.00354684 | 0.666808764 |
| -0.1223971 | cg18505453 | TREM1        | 6  | 0.03757479 | 0.778008296 |
| -0.1803855 | cg06196379 | TREM1        | 6  | 0.0144755  | 0.511981886 |
| -0.168851  | cg21328082 | TREM1        | 6  | 0.00058167 | 0.582888485 |
| -0.1231844 | cg10981439 | TREM1;TREN   | 6  | 0.00095015 | 0.698020008 |
| -0.1072229 | cg10725937 | TREM2        | 6  | 0.00402138 | 0.500755231 |
| -0.1067963 | cg15658306 | TREML2       | 6  | 0.00070928 | 0.389375892 |
| -0.1298085 | cg25473438 | TREML2       | 6  | 0.00233724 | 0.553654851 |
| -0.1705509 | cg01506917 | TRERF1       | 6  | 0.01711484 | 0.625702543 |
| -0.1186661 | cg05264377 | TRERF1       | 6  | 0.00649195 | 0.527191068 |
| -0.1656975 | cg16597079 | TRERF1       | 6  | 0.00239581 | 0.626597434 |
| -0.1192475 | cg04753163 | TRERF1       | 6  | 0.00504001 | 0.804332155 |
| -0.1338955 | cg09103187 | TRERF1       | 6  | 0.04856936 | 0.405274178 |
| -0.1920965 | cg09804858 | TRERF1       | 6  | 0.00296672 | 0.777581238 |
| -0.1336712 | cg11854981 | TRERF1       | 6  | 0.0231736  | 0.681008148 |
| -0.1159549 | cg22644321 | TRIB1        | 8  | 0.00737491 | 0.750453762 |
| -0.1044833 | cg21225548 | TRIM14;TRIN  | 9  | 0.02458624 | 0.499471155 |
| -0.1487015 | cg01717609 | TRIM17;TRIN  | 1  | 0.00806573 | 0.702840722 |
| -0.123954  | cg00474889 | TRIM22;TRIN  | 11 | 0.04326228 | 0.640305889 |
| -0.1405431 | cg08850243 | TRIM26       | 6  | 0.03957534 | 0.841068221 |
| -0.1007983 | cg14606478 | TRIM26       | 6  | 0.01685728 | 0.510465467 |
| -0.1820926 | cg01505556 | TRIM26       | 6  | 0.01567366 | 0.435135137 |

|            |            |              |    |            |             |
|------------|------------|--------------|----|------------|-------------|
| -0.1040301 | cg14741870 | TRIM26       | 6  | 0.01710783 | 0.695299037 |
| -0.1885362 | cg17344091 | TRIM27       | 6  | 0.04104793 | 0.897713336 |
| -0.243639  | cg01591152 | TRIM29       | 11 | 0.01736581 | 0.500771495 |
| -0.1586538 | cg15480962 | TRIM31       | 6  | 0.01455944 | 0.511260957 |
| -0.1393747 | cg17048834 | TRIM31       | 6  | 0.00839953 | 0.628169516 |
| -0.1062004 | cg01190484 | TRIM40;TRIM  | 6  | 0.02552835 | 0.470033616 |
| -0.1549637 | cg06365108 | TRIM40;TRIM  | 6  | 0.0025357  | 0.607152198 |
| -0.1767024 | cg26700215 | TRIM55;TRIM  | 8  | 0.00017601 | 0.548188616 |
| -0.1605598 | cg21186955 | TRIM56       | 7  | 0.00888451 | 0.508279022 |
| -0.1302042 | cg05439368 | TRIM69;TRIM  | 15 | 0.00734238 | 0.777162778 |
| -0.1083497 | cg22107533 | TRIM69;TRIM  | 15 | 0.0064618  | 0.677462228 |
| -0.1108328 | cg17980786 | TRIM71       | 3  | 0.01311738 | 0.76533207  |
| -0.1327268 | cg19200592 | TRIM71       | 3  | 0.00297351 | 0.581097364 |
| -0.1130989 | cg22991925 | TRIM74;TRIM  | 7  | 0.00040707 | 0.375304703 |
| -0.1084179 | cg21531038 | TRIO         | 5  | 0.00212896 | 0.777980475 |
| -0.1014248 | cg17510385 | TRIP13       | 5  | 0.04766136 | 0.769809257 |
| -0.1971173 | cg11421768 | TRIP13       | 5  | 0.01235036 | 0.796757365 |
| -0.1311592 | cg17128833 | TRPC2        | 11 | 0.00120283 | 0.339256367 |
| -0.2661468 | cg07383757 | TRPC2        | 11 | 0.00589728 | 0.76369922  |
| -0.1920459 | cg20893919 | TRPC3;TRPC3  | 4  | 0.03294863 | 0.677734356 |
| -0.1735179 | cg17206393 | TRPC4AP;TRIP | 20 | 0.00407116 | 0.660161619 |
| -0.1269468 | cg14255426 | TRPM2        | 21 | 0.02995585 | 0.361315289 |
| -0.2005691 | cg19011752 | TRPM2        | 21 | 0.01555987 | 0.524486053 |
| -0.1361228 | cg17406359 | TRPM2        | 21 | 0.0173459  | 0.618666963 |
| -0.1235073 | cg04506569 | TRPM8        | 2  | 0.01298309 | 0.591233025 |
| -0.1934993 | cg16732648 | TRPV2        | 17 | 0.0038687  | 0.313355747 |
| -0.1405107 | cg26719625 | TRPV2        | 17 | 0.00308431 | 0.794825782 |
| -0.1167492 | cg09093656 | TRPV2        | 17 | 0.003325   | 0.692969011 |
| -0.274472  | cg10825315 | TSHR;TSHR;T  | 14 | 0.03934495 | 0.6594698   |
| -0.2698108 | cg18625627 | TSHR;TSHR;T  | 14 | 0.00868978 | 0.746806475 |
| -0.1577989 | cg22873165 | TSNARE1      | 8  | 0.03390984 | 0.722340895 |
| -0.1213397 | cg11277662 | TSNARE1      | 8  | 0.02339664 | 0.906194318 |
| -0.1873957 | cg10122294 | TSNAX-DISC1  | 1  | 0.00313953 | 0.346774064 |
| -0.1837525 | cg04250837 | TSNAX-DISC1  | 1  | 0.02011631 | 0.705062126 |
| -0.1745653 | cg09690632 | TSPAN10      | 17 | 0.01877169 | 0.80033511  |
| -0.1104249 | cg05946353 | TSPAN10      | 17 | 0.00854763 | 0.726394198 |
| -0.1080055 | cg01481646 | TSPAN14;TSF  | 10 | 0.00533259 | 0.800119167 |
| -0.1180742 | cg08560387 | TSPAN14;TSF  | 10 | 0.00721004 | 0.812107539 |
| -0.1148188 | cg24328142 | TSPAN15      | 10 | 0.0019304  | 0.776525706 |
| -0.1596062 | cg18247223 | TSPAN18      | 11 | 0.04980584 | 0.650065397 |
| -0.135431  | cg04898130 | TSPAN18      | 11 | 0.01695716 | 0.294279149 |
| -0.1269598 | cg16009677 | TSPAN2       | 1  | 0.0045223  | 0.556726628 |
| -0.1249807 | cg04950931 | TSPAN8       | 12 | 0.0063863  | 0.642702069 |
| -0.1197393 | cg15852320 | TSPAN9;TSPAN | 12 | 0.00453208 | 0.73415993  |
| -0.1195338 | cg11958128 | TSPAN9;TSPAN | 12 | 0.00359193 | 0.733008592 |
| -0.1137258 | cg09976369 | TSSC1        | 2  | 0.02103429 | 0.551885553 |



|            |            |             |    |            |             |
|------------|------------|-------------|----|------------|-------------|
| -0.1124    | cg14446504 | TSSC1       | 2  | 0.02950804 | 0.836471792 |
| -0.1078737 | cg06241901 | TTBK1       | 6  | 0.04196055 | 0.677035075 |
| -0.1024662 | cg02779913 | TTC25       | 17 | 0.0095978  | 0.829581504 |
| -0.1326538 | cg14340336 | TTC25       | 17 | 0.00263745 | 0.495246872 |
| -0.205831  | cg08736088 | TTC29       | 4  | 0.02758617 | 0.578285384 |
| -0.158464  | cg01710361 | TTC39A;TTC3 | 1  | 0.00401483 | 0.516929049 |
| -0.101467  | cg08280368 | TTC9        | 14 | 0.02293515 | 0.679652705 |
| -0.1955695 | cg19319037 | TTF2        | 1  | 0.03887268 | 0.535970023 |
| -0.1942571 | cg03174228 | TLL11       | 9  | 0.01424206 | 0.522265981 |
| -0.1621847 | cg21970438 | TLL2        | 6  | 0.00705398 | 0.629544568 |
| -0.1208477 | cg26282283 | TTYH3       | 7  | 0.04229408 | 0.42555031  |
| -0.2365446 | cg19050555 | TUBA1C      | 12 | 0.00659863 | 0.842495521 |
| -0.1052066 | cg01108243 | TUBB1       | 20 | 0.00948616 | 0.663571917 |
| -0.1015779 | cg13756273 | TUBB1;TUBB  | 20 | 0.00657534 | 0.791467552 |
| -0.175061  | cg19244428 | TUBB2B      | 6  | 0.00068258 | 0.583159176 |
| -0.1031736 | cg04273422 | TUBB4       | 19 | 0.01602263 | 0.498149169 |
| -0.1254931 | cg22609331 | TUBB8;TUBB  | 10 | 0.00409221 | 0.650252799 |
| -0.1997407 | cg20930202 | TXLNB       | 6  | 0.00992308 | 0.323061063 |
| -0.1092332 | cg10416593 | TYMP;SCO2;  | 22 | 0.01571557 | 0.814068972 |
| -0.102058  | cg14557690 | UAP1L1      | 9  | 0.029076   | 0.62321176  |
| -0.1492744 | cg16193278 | UBAC2;MIR6  | 13 | 0.02601192 | 0.791329189 |
| -0.1139772 | cg05257202 | UBAC2;UBAC  | 13 | 0.00571865 | 0.631680143 |
| -0.1298866 | cg12578486 | UBAC2;UBAC  | 13 | 0.00369672 | 0.646746293 |
| -0.1654036 | cg07450210 | UBAC2;UBAC  | 13 | 0.00081037 | 0.73756781  |
| -0.1027915 | cg08706575 | UBASH3B     | 11 | 0.01132647 | 0.69297429  |
| -0.1386702 | cg24058145 | UBD         | 6  | 0.00346149 | 0.824392595 |
| -0.1812434 | cg17599045 | UBE2J2;UBE2 | 1  | 0.00046841 | 0.902182162 |
| -0.1852655 | cg26844104 | UBE2L3;UBE2 | 22 | 0.00263974 | 0.319678568 |
| -0.1172509 | cg11554335 | UBE2L6      | 11 | 0.00076357 | 0.445368924 |
| -0.1013795 | cg27429749 | UBE2L6;UBE2 | 11 | 0.00220133 | 0.534661021 |
| -0.141502  | cg04346683 | UBE2Q2;UBE  | 15 | 0.01999399 | 0.545842265 |
| -0.2309978 | cg03263197 | UBL4B       | 1  | 0.01017142 | 0.29977469  |
| -0.1381028 | cg17295666 | UBOX5;FASTI | 20 | 0.00764051 | 0.452128803 |
| -0.140912  | cg08130175 | UBXN10      | 1  | 0.00622759 | 0.594522011 |
| -0.1052205 | cg14699903 | UCN2        | 3  | 0.0050349  | 0.687815995 |
| -0.102616  | cg11873311 | UGGT1;UGG   | 2  | 0.03696248 | 0.695872483 |
| -0.1314367 | cg22145666 | UGT1A10;UC  | 2  | 0.00630638 | 0.646552156 |
| -0.2904769 | cg08132815 | UHRF1;UHRF  | 19 | 0.0174861  | 0.909083669 |
| -0.219416  | cg21311067 | UHRF1;UHRF  | 19 | 0.04754277 | 0.859469817 |
| -0.1474672 | cg25982880 | UHRF1;UHRF  | 19 | 0.00386949 | 0.736264919 |
| -0.1224026 | cg06635797 | UHRF1;UHRF  | 19 | 0.00055248 | 0.323225825 |
| -0.1123617 | cg18901104 | UHRF1;UHRF  | 19 | 0.01554749 | 0.662940986 |
| -0.1059727 | cg20724032 | ULK4        | 3  | 0.02704824 | 0.400590236 |
| -0.2193341 | cg16413715 | UNC5A       | 5  | 0.00781554 | 0.640633211 |
| -0.1150733 | cg01311313 | UNC5D       | 8  | 0.00474952 | 0.60490409  |
| -0.1218664 | cg13302994 | UNC80;UNC8  | 2  | 0.0035637  | 0.296563322 |

|            |            |            |    |            |             |
|------------|------------|------------|----|------------|-------------|
| -0.2065307 | cg11753750 | UNC84B     | 22 | 0.00643337 | 0.639917866 |
| -0.1344715 | cg20434422 | UOX        | 1  | 0.01077878 | 0.809533303 |
| -0.127485  | cg03091668 | UPB1       | 22 | 0.03730202 | 0.306907892 |
| -0.1019703 | cg05516285 | UQCRFS1    | 19 | 0.04824442 | 0.418008498 |
| -0.1045247 | cg04585822 | USH1G      | 17 | 0.01719864 | 0.772189998 |
| -0.1145353 | cg13977660 | USP42      | 7  | 0.0071726  | 0.614181062 |
| -0.1018208 | cg09594210 | UST        | 6  | 0.02713203 | 0.282429592 |
| -0.1932785 | cg15587792 | UVRAG      | 11 | 0.01059642 | 0.781953284 |
| -0.1646252 | cg11274172 | UVRAG      | 11 | 0.00419112 | 0.786789611 |
| -0.1616458 | cg05486094 | VAMP8      | 2  | 0.01538161 | 0.50869922  |
| -0.1812552 | cg08041014 | VAT1       | 17 | 0.04739886 | 0.575504084 |
| -0.1782714 | cg06710195 | VAV3       | 1  | 0.00423595 | 0.588191508 |
| -0.1426429 | cg04295372 | VCAM1;VCAI | 1  | 0.00078372 | 0.708015081 |
| -0.1274045 | cg25763716 | VCAM1;VCAI | 1  | 0.00026193 | 0.562685192 |
| -0.1080517 | cg23097079 | VENTX      | 10 | 0.00036831 | 0.345341872 |
| -0.2460364 | cg26063719 | VIM        | 10 | 0.00631737 | 0.270143517 |
| -0.1334269 | cg14260889 | VIM        | 10 | 0.00586547 | 0.806330445 |
| -0.1216171 | cg12595461 | VIT        | 2  | 0.01125706 | 0.478534596 |
| -0.2171744 | cg08023175 | VN1R1      | 19 | 0.01608566 | 0.812726905 |
| -0.1475111 | cg02459818 | VN1R4      | 19 | 0.00045417 | 0.601036317 |
| -0.2244225 | cg00852964 | VNN1       | 6  | 0.00863354 | 0.554563647 |
| -0.2322252 | cg23654401 | VOPP1      | 7  | 0.00264537 | 0.640838248 |
| -0.1899648 | cg18441959 | VPREB1     | 22 | 0.00070936 | 0.299935157 |
| -0.1334055 | cg03763796 | VPREB1     | 22 | 0.00034965 | 0.600558511 |
| -0.2328891 | cg25330366 | VPREB1     | 22 | 8.50E-05   | 0.35878504  |
| -0.1784883 | cg14844130 | VPREB1     | 22 | 0.0003122  | 0.396877132 |
| -0.1515221 | cg07179634 | VPS37C     | 11 | 0.00071411 | 0.258689264 |
| -0.1507226 | cg12315311 | VSTM1      | 19 | 0.00225808 | 0.64779812  |
| -0.1252073 | cg21689902 | VWA5A;VWA  | 11 | 0.00106511 | 0.509578644 |
| -0.1140281 | cg25884442 | VWF        | 12 | 0.0044343  | 0.462852786 |
| -0.1091317 | cg04233521 | WASF2      | 1  | 0.03037668 | 0.638565632 |
| -0.1661454 | cg18898325 | WBP2NL     | 22 | 0.01367453 | 0.764084611 |
| -0.1501479 | cg01679206 | WBSCR27    | 7  | 0.02411762 | 0.582062138 |
| -0.1054483 | cg00187692 | WDFY2      | 13 | 0.03938403 | 0.530927141 |
| -0.1051987 | cg27459529 | WDFY4      | 10 | 0.0042679  | 0.717180902 |
| -0.1170128 | cg00404025 | WDFY4      | 10 | 0.03198357 | 0.783250059 |
| -0.116758  | cg09897604 | WDFY4;WDF  | 10 | 0.02180305 | 0.667822943 |
| -0.2042743 | cg20319654 | WDR43      | 2  | 0.02610688 | 0.481493535 |
| -0.166598  | cg11129609 | WDR46;WDR  | 6  | 0.01085012 | 0.674663832 |
| -0.1664104 | cg09755594 | WDR63      | 1  | 0.00493197 | 0.541660739 |
| -0.1285748 | cg22822803 | WDR8       | 1  | 0.01676147 | 0.508311865 |
| -0.1473109 | cg10080732 | WDR81;WDR  | 17 | 0.00522505 | 0.31589231  |
| -0.1169759 | cg09433910 | WDR81;WDR  | 17 | 0.00044333 | 0.409214895 |
| -0.125491  | cg20485165 | WFDC12     | 20 | 0.00033877 | 0.658294628 |
| -0.1764435 | cg10025586 | WHAMM      | 15 | 0.02726589 | 0.83227236  |
| -0.1535389 | cg15558558 | WHAMM      | 15 | 0.01193027 | 0.423508405 |

|            |              |              |    |            |             |
|------------|--------------|--------------|----|------------|-------------|
| -0.1506194 | cg20098478   | WIF1         | 12 | 0.00966319 | 0.570359387 |
| -0.1288251 | cg19275653   | WIPF1        | 2  | 0.00245429 | 0.557547026 |
| -0.1166706 | cg15058645   | WIPF1        | 2  | 0.00304943 | 0.594221522 |
| -0.1077916 | cg14035238   | WIPF1;WIPF1  | 2  | 0.03376556 | 0.721793051 |
| -0.1500115 | cg13885155   | WIPF1;WIPF1  | 2  | 0.02347421 | 0.767226199 |
| -0.1179235 | cg27117828   | WIPF1;WIPF1  | 2  | 0.0009745  | 0.631822484 |
| -0.1669669 | cg03983223   | WIPF1;WIPF1  | 2  | 0.00195698 | 0.554834028 |
| -0.1177177 | cg03562120   | WISP2;WISP2  | 20 | 0.02881605 | 0.696993735 |
| -0.1213304 | cg20324199   | WNK2         | 9  | 0.0408479  | 0.887569405 |
| -0.1330801 | cg26053066   | WNK2         | 9  | 0.04396347 | 0.646779962 |
| -0.1169358 | cg05886546   | WNK4         | 17 | 0.00143015 | 0.707599699 |
| -0.1783619 | cg14457782   | WNK4         | 17 | 0.0217755  | 0.614419512 |
| -0.1231219 | cg16695758   | WNK4         | 17 | 0.0073286  | 0.454282907 |
| -0.1792034 | cg20633317   | WNT11        | 11 | 0.00502148 | 0.641813202 |
| -0.1516187 | cg04154465   | WNT2B        | 1  | 0.00628321 | 0.654642827 |
| -0.1039676 | cg15237742   | WNT3         | 17 | 0.00126579 | 0.433527497 |
| -0.1627715 | cg20656587   | WNT3         | 17 | 0.00045549 | 0.393708144 |
| -0.1498811 | cg24114556   | WNT3         | 17 | 0.00021645 | 0.482295052 |
| -0.1394361 | cg26121234   | WNT7A        | 3  | 0.00143371 | 0.340890463 |
| -0.1271782 | cg02179982   | WNT7B        | 22 | 0.02716576 | 0.697881865 |
| -0.1188086 | cg07777652   | WRB          | 21 | 0.0138992  | 0.644423599 |
| -0.2017668 | cg24115019   | WWC1;WWC     | 5  | 0.00133909 | 0.497121144 |
| -0.183977  | cg18484958   | WWTR1;WW     | 3  | 0.00576223 | 0.696069074 |
| -0.1117837 | cg10353683   | XCR1;XCR1    | 3  | 0.01291281 | 0.583384185 |
| -0.2067585 | cg02243386   | XIRP1        | 3  | 0.03771472 | 0.59292776  |
| -0.1650277 | cg14769021   | XIRP1        | 3  | 0.00840173 | 0.450785377 |
| -0.1575508 | cg07193389   | XKR3         | 22 | 0.0130544  | 0.465538473 |
| -0.2159833 | ch.22.11243R | XKR3         | 22 | 0.0171505  | 0.168801753 |
| -0.2365217 | cg24394891   | XPNPEP1;XPI  | 10 | 0.04608023 | 0.70853741  |
| -0.1871699 | cg11845168   | XPO4         | 13 | 0.00536583 | 0.616963933 |
| -0.1736867 | cg26730763   | XPO6         | 16 | 0.0032554  | 0.526523499 |
| -0.1166493 | cg02889774   | XPO7;XPO7;   | 8  | 0.04298426 | 0.736107023 |
| -0.1414716 | cg07140459   | XRN1;XRN1    | 3  | 0.00171093 | 0.471460077 |
| -0.1306137 | cg15389191   | XRR1         | 11 | 0.01590706 | 0.769104485 |
| -0.1123197 | cg09745987   | XYLT1        | 16 | 0.00113247 | 0.373253535 |
| -0.1050339 | cg08908247   | YIF1A        | 11 | 0.00176825 | 0.619479413 |
| -0.164404  | cg19743666   | YPEL5;YPEL5; | 2  | 0.00838281 | 0.629720142 |
| -0.2159499 | cg00004667   | ZBTB17       | 1  | 0.00953655 | 0.641703461 |
| -0.210134  | cg03559942   | ZBTB3        | 11 | 0.0008389  | 0.487074927 |
| -0.1362129 | cg17495555   | ZBTB38       | 3  | 0.04421354 | 0.739922232 |
| -0.2066028 | cg03025465   | ZBTB38       | 3  | 0.00816909 | 0.803918142 |
| -0.1702343 | cg03523104   | ZBTB39       | 12 | 0.04588644 | 0.586538691 |
| -0.1561015 | cg01943641   | ZBTB39       | 12 | 0.00861993 | 0.75226428  |
| -0.1228659 | cg01209296   | ZBTB46       | 20 | 0.03742919 | 0.786652925 |
| -0.1088795 | cg19680850   | ZC3H12A      | 1  | 0.00221352 | 0.245649043 |
| -0.1241096 | cg00859858   | ZC3H12A      | 1  | 0.01534879 | 0.788671518 |

|            |            |                 |    |            |             |
|------------|------------|-----------------|----|------------|-------------|
| -0.1054246 | cg14030904 | ZC3H12D         | 6  | 0.04068472 | 0.802570264 |
| -0.1075201 | cg00073460 | ZC3H12D         | 6  | 0.01534754 | 0.314298406 |
| -0.1274664 | cg06762457 | ZC3H12D         | 6  | 0.02745318 | 0.527148465 |
| -0.1682643 | cg01107185 | ZC3HAV1;ZC3     | 7  | 0.00594002 | 0.502284358 |
| -0.1231787 | cg04118234 | ZC3HAV1;ZC3     | 7  | 0.00302599 | 0.795641939 |
| -0.1043752 | cg08713098 | ZCWPW1          | 7  | 0.0005258  | 0.416896726 |
| -0.1123738 | cg12336777 | ZEB2;ZEB2       | 2  | 0.02856185 | 0.781236524 |
| -0.1373734 | cg06063479 | ZEB2;ZEB2       | 2  | 0.0420776  | 0.765811261 |
| -0.2055571 | cg23095192 | ZEB2;ZEB2;ZEB   | 2  | 0.00021157 | 0.452040229 |
| -0.1495068 | cg26608667 | ZFAND2A         | 7  | 0.00900175 | 0.536733621 |
| -0.2267641 | cg03003722 | ZFAND3          | 6  | 0.0318352  | 0.775563862 |
| -0.2188033 | cg08116775 | ZFAT            | 8  | 0.04977705 | 0.791119759 |
| -0.1286293 | cg05516390 | ZFH3            | 16 | 0.03724361 | 0.702878569 |
| -0.1278779 | cg05972185 | ZFH3;ZFH3       | 16 | 0.00649796 | 0.5544753   |
| -0.125373  | cg10298741 | ZFH3;ZFH3       | 16 | 0.01214458 | 0.578171081 |
| -0.1574689 | cg07176589 | ZFH3;LOC100286  | 8  | 0.02148284 | 0.757708225 |
| -0.1015666 | cg10174063 | ZFP57           | 6  | 0.02437209 | 0.618996886 |
| -0.2195    | cg04884025 | ZFYVE9;ZFYV     | 1  | 0.03746866 | 0.541483092 |
| -0.1068316 | cg03096107 | ZG16B           | 16 | 0.00557643 | 0.29412564  |
| -0.1346646 | cg05461841 | ZG16B           | 16 | 0.00868275 | 0.421690988 |
| -0.1167751 | cg26791399 | ZIC4;ZIC4       | 3  | 0.01008611 | 0.397438903 |
| -0.1111427 | cg02390329 | ZIC4;ZIC4;ZIC   | 3  | 0.01760596 | 0.789778285 |
| -0.1025974 | cg25449440 | ZIC4;ZIC4;ZIC   | 3  | 0.04864276 | 0.566191505 |
| -0.1238033 | cg26224785 | ZIC4;ZIC4;ZIC   | 3  | 0.00915753 | 0.601369648 |
| -0.2401494 | cg15287806 | ZMYND11;ZMYND   | 10 | 0.0126886  | 0.86853652  |
| -0.1004462 | cg13699808 | ZMYND8;ZMYND    | 20 | 0.00081347 | 0.225800026 |
| -0.1633012 | cg24413068 | ZNF155;ZNF155   | 19 | 0.00884438 | 0.610440925 |
| -0.1098502 | cg01855245 | ZNF19           | 16 | 0.00497688 | 0.757643772 |
| -0.1473427 | cg27474223 | ZNF19           | 16 | 0.00219754 | 0.753123681 |
| -0.1081781 | cg26863821 | ZNF205;ZNF205   | 16 | 0.03884783 | 0.423600684 |
| -0.1602007 | cg18507146 | ZNF236          | 18 | 0.00372016 | 0.377928888 |
| -0.1205948 | cg27118035 | ZNF267          | 16 | 0.00670919 | 0.260146825 |
| -0.1067098 | cg05398260 | ZNF273;ZNF273   | 7  | 0.0011912  | 0.19249655  |
| -0.1465717 | cg16402415 | ZNF280D;ZNF280D | 15 | 0.02791239 | 0.434131613 |
| -0.1156972 | cg14690467 | ZNF282          | 7  | 0.03248958 | 0.538002703 |
| -0.2269702 | cg12023844 | ZNF286A;ZNF286A | 17 | 0.02565219 | 0.673057288 |
| -0.1457019 | cg02278959 | ZNF286B;ZNF286B | 17 | 0.0052701  | 0.722256841 |
| -0.1335872 | cg15394911 | ZNF331;ZNF331   | 19 | 0.01097999 | 0.827485051 |
| -0.1128866 | cg03861065 | ZNF365;ZNF365   | 10 | 0.00821329 | 0.837457008 |
| -0.146052  | cg13823492 | ZNF365;ZNF365   | 10 | 0.00710599 | 0.793309142 |
| -0.1517142 | cg09287086 | ZNF365;ZNF365   | 10 | 0.01124098 | 0.838972511 |
| -0.1403738 | cg04566677 | ZNF385A;ZNF385A | 12 | 0.01090965 | 0.695432183 |
| -0.17105   | cg21330896 | ZNF395          | 8  | 0.00121732 | 0.274118152 |
| -0.10415   | cg25888881 | ZNF438;ZNF438   | 10 | 0.02496712 | 0.806150655 |
| -0.1008959 | cg07787851 | ZNF474          | 5  | 0.0071994  | 0.863651817 |
| -0.1210323 | cg21213593 | ZNF608          | 5  | 0.00929055 | 0.784605648 |

|            |            |             |    |            |             |
|------------|------------|-------------|----|------------|-------------|
| -0.1156859 | cg18651544 | ZNF610;ZNF6 | 19 | 0.03351827 | 0.831080892 |
| -0.1500815 | cg26523005 | ZNF662;ZNF6 | 3  | 0.01099179 | 0.373033746 |
| -0.1902726 | cg10380221 | ZNF668      | 16 | 0.01680384 | 0.432494368 |
| -0.1557172 | cg26029292 | ZNF7        | 8  | 0.04042712 | 0.581095254 |
| -0.1076634 | cg12193649 | ZNF705A     | 12 | 0.03794596 | 0.644533084 |
| -0.1453652 | cg23035449 | ZNF710      | 15 | 0.01172656 | 0.784816551 |
| -0.1211085 | cg18443571 | ZNF710      | 15 | 0.0134045  | 0.62457605  |
| -0.210478  | cg09939948 | ZNF710      | 15 | 0.00100184 | 0.312594018 |
| -0.1507972 | cg16558770 | ZNF710      | 15 | 0.00555216 | 0.838384636 |
| -0.1098985 | cg09352518 | ZNF714      | 19 | 0.04611468 | 0.323071013 |
| -0.1517447 | cg09652526 | ZNF831      | 20 | 0.01240394 | 0.674623848 |
| -0.1391858 | cg07510230 | ZNRF2       | 7  | 0.00328952 | 0.31679342  |
| -0.1204908 | cg06442489 | ZSCAN18;ZSC | 19 | 0.01518271 | 0.800489711 |
| -0.1522574 | cg21873967 | ZSCAN4      | 19 | 0.01477301 | 0.772163688 |
| -0.1205239 | cg09704136 | ZYX;ZYX     | 7  | 0.03879643 | 0.775192581 |
| -0.3078299 | cg23600372 |             | 12 | 0.04386549 | 0.809007435 |
| -0.2477422 | cg23598480 |             | 2  | 0.0174425  | 0.714730607 |
| -0.1403976 | cg02313986 |             | 15 | 0.038376   | 0.507832547 |
| -0.127418  | cg19580937 |             | 15 | 0.04195508 | 0.720698555 |
| -0.1217688 | cg05157340 |             | 17 | 0.03263866 | 0.826558571 |
| -0.1171933 | cg13902786 |             | 9  | 0.01982751 | 0.724967111 |
| -0.1023116 | cg09845806 |             | 20 | 0.04951916 | 0.449598742 |
| -0.1222527 | cg07652189 |             | 4  | 0.00799848 | 0.821630911 |
| -0.1215625 | cg02320356 |             | 8  | 0.00022274 | 0.761827574 |
| -0.1154099 | cg05394800 |             | 13 | 0.00121732 | 0.701634522 |
| -0.1104815 | cg05509190 |             | 2  | 0.02293877 | 0.375835137 |
| -0.1974724 | cg26612821 |             | 1  | 0.01376677 | 0.500900017 |
| -0.1408536 | cg24876404 |             | 2  | 0.0225429  | 0.273417    |
| -0.1468326 | cg10453602 |             | 2  | 0.0056213  | 0.366777516 |
| -0.119243  | cg09476092 |             | 21 | 0.01573592 | 0.807750593 |
| -0.2107165 | cg00681462 |             | 14 | 0.03157486 | 0.854236146 |
| -0.2035552 | cg25840608 |             | 15 | 0.03996856 | 0.658168421 |
| -0.1873171 | cg19081751 |             | 7  | 0.00266417 | 0.782869394 |
| -0.1848908 | cg19734013 |             | 17 | 0.03586747 | 0.601633489 |
| -0.1825921 | cg02287693 |             | 22 | 0.0082208  | 0.633185146 |
| -0.1763958 | cg11658707 |             | 1  | 0.00080635 | 0.292591407 |
| -0.170027  | cg10144474 |             | 15 | 0.01826283 | 0.550066627 |
| -0.1562927 | cg01806921 |             | 22 | 0.01645327 | 0.721938513 |
| -0.1552285 | cg14284394 |             | 1  | 0.00282444 | 0.861781948 |
| -0.1523959 | cg05283992 |             | 11 | 0.00528834 | 0.777483326 |
| -0.132297  | cg15749661 |             | 2  | 0.0486002  | 0.691857374 |
| -0.1239504 | cg22804528 |             | 3  | 0.02692287 | 0.847405838 |
| -0.1223303 | cg09764611 |             | 12 | 0.03809615 | 0.5177773   |
| -0.1202432 | cg20544552 |             | 11 | 0.00575738 | 0.233934697 |
| -0.1130591 | cg25654705 |             | 4  | 0.01007321 | 0.898546074 |
| -0.1045436 | cg15609272 |             | 5  | 0.01420431 | 0.318843345 |

|            |            |    |            |             |
|------------|------------|----|------------|-------------|
| -0.1023337 | cg08456817 | 2  | 0.04177808 | 0.89457104  |
| -0.1477747 | cg02637253 | 1  | 0.01966724 | 0.23546521  |
| -0.1400344 | cg08299521 | 5  | 0.03878526 | 0.459096072 |
| -0.204957  | cg13632630 | 15 | 0.01867592 | 0.32780603  |
| -0.1598215 | cg23987336 | 17 | 0.00087272 | 0.269798171 |
| -0.120971  | cg25984050 | 4  | 0.00165744 | 0.228561025 |
| -0.1153414 | cg18360755 | 2  | 0.03679405 | 0.698250427 |
| -0.156717  | cg08531380 | 1  | 0.00716837 | 0.709637913 |
| -0.1512548 | cg01342115 | 3  | 0.03504001 | 0.397513003 |
| -0.1429474 | cg14911766 | 6  | 0.04758861 | 0.373949048 |
| -0.1403752 | cg15613991 | 7  | 0.04972739 | 0.48997181  |
| -0.1375971 | cg00377344 | 10 | 0.03407444 | 0.417354105 |
| -0.1191941 | cg25326289 | 7  | 0.00097657 | 0.385902542 |
| -0.1009414 | cg02452460 | 10 | 0.02947664 | 0.801252122 |
| -0.1303072 | cg17472800 | 5  | 0.00399923 | 0.255641484 |
| -0.1508251 | cg10186131 | 15 | 0.00240163 | 0.8717998   |
| -0.1260949 | cg18463802 | 11 | 0.00797077 | 0.362601063 |
| -0.1875995 | cg14702960 | 12 | 0.00198127 | 0.322306435 |
| -0.2534787 | cg01178099 | 3  | 0.02291884 | 0.261333498 |
| -0.2271069 | cg20385368 | 4  | 0.00786543 | 0.815187444 |
| -0.1954468 | cg10378348 | 1  | 0.04036694 | 0.594090492 |
| -0.1532289 | cg08008352 | 16 | 0.00039891 | 0.266653091 |
| -0.1431892 | cg24427895 | 11 | 0.00123735 | 0.277682406 |
| -0.140261  | cg00232535 | 7  | 0.02381159 | 0.677294617 |
| -0.1334184 | cg14690102 | 11 | 0.00886637 | 0.397305369 |
| -0.1287683 | cg21954370 | 15 | 0.02612575 | 0.871656689 |
| -0.2396687 | cg20387775 | 6  | 0.04064029 | 0.683772945 |
| -0.183185  | cg06719901 | 3  | 0.0199119  | 0.819124788 |
| -0.1745597 | cg20165946 | 7  | 0.02665895 | 0.654567036 |
| -0.1742956 | cg01516005 | 10 | 0.01473459 | 0.412005532 |
| -0.1739172 | cg23695131 | 11 | 0.00932953 | 0.646526579 |
| -0.1651912 | cg25818605 | 2  | 0.01782241 | 0.609456519 |
| -0.1446533 | cg06306879 | 16 | 0.02272702 | 0.631471589 |
| -0.1428386 | cg12441694 | 13 | 0.01400271 | 0.705663556 |
| -0.1407267 | cg01462537 | 10 | 0.00723832 | 0.795302153 |
| -0.1370883 | cg14213406 | 7  | 0.0002944  | 0.569283985 |
| -0.1296656 | cg14126408 | 10 | 0.01218666 | 0.693320135 |
| -0.1137492 | cg24544808 | 6  | 0.02875956 | 0.833796259 |
| -0.1094115 | cg09494418 | 11 | 0.03255865 | 0.309225589 |
| -0.1013732 | cg02855045 | 3  | 0.01477311 | 0.761901331 |
| -0.1002165 | cg27509105 | 2  | 0.01077303 | 0.839883399 |
| -0.2807633 | cg13531387 | 9  | 0.01218704 | 0.447829715 |
| -0.2574747 | cg13505693 | 7  | 0.01911496 | 0.636312946 |
| -0.2129805 | cg22081371 | 1  | 0.00093174 | 0.196498395 |
| -0.2087296 | cg23698978 | 7  | 0.00747159 | 0.304567006 |
| -0.1516639 | cg19009471 | 14 | 0.00899978 | 0.669087728 |

|            |            |    |            |             |
|------------|------------|----|------------|-------------|
| -0.1487863 | cg09462806 | 7  | 0.00407277 | 0.36814975  |
| -0.1374788 | cg00749609 | 19 | 0.00306503 | 0.250530647 |
| -0.115297  | cg06181286 | 3  | 0.04413682 | 0.68592891  |
| -0.1126489 | cg18395917 | 11 | 0.00239845 | 0.697136609 |
| -0.1581323 | cg25916172 | 10 | 0.0019999  | 0.52272316  |
| -0.1163864 | cg10777347 | 7  | 0.02083696 | 0.334718088 |
| -0.1897694 | cg24766327 | 10 | 0.00753928 | 0.373364782 |
| -0.1726908 | cg21398996 | 13 | 0.00031737 | 0.274635804 |
| -0.1842801 | cg16959787 | 13 | 0.04263777 | 0.825094751 |
| -0.1349991 | cg06120359 | 8  | 0.01101172 | 0.730732919 |
| -0.1096213 | cg00098304 | 15 | 0.01669552 | 0.389854722 |
| -0.1232314 | cg11426080 | 10 | 0.03666704 | 0.360296597 |
| -0.1190813 | cg25214376 | 10 | 0.00513124 | 0.653492932 |
| -0.2089108 | cg15896593 | 1  | 0.00467451 | 0.657991057 |
| -0.1851065 | cg10442729 | 2  | 0.00972124 | 0.728361959 |
| -0.1839143 | cg19777067 | 4  | 0.03626612 | 0.596080575 |
| -0.1811592 | cg09341796 | 22 | 0.01238904 | 0.586966681 |
| -0.1670562 | cg00218409 | 2  | 0.00313066 | 0.252977187 |
| -0.154662  | cg26019250 | 11 | 0.01052981 | 0.563643902 |
| -0.1464289 | cg19179099 | 10 | 0.01430543 | 0.730160581 |
| -0.1256105 | cg22718891 | 1  | 0.01810004 | 0.288275021 |
| -0.1230508 | cg14947846 | 2  | 0.01187959 | 0.854682085 |
| -0.1228345 | cg18645361 | 20 | 0.01775302 | 0.847199265 |
| -0.108395  | cg19856593 | 21 | 0.01864905 | 0.724202456 |
| -0.1021858 | cg13708803 | 8  | 0.00913084 | 0.349695842 |
| -0.1716872 | cg07086945 | 6  | 0.02139955 | 0.236100465 |
| -0.1698621 | cg10888902 | 10 | 0.00595327 | 0.377097581 |
| -0.1404343 | cg15036867 | 7  | 0.02757296 | 0.253300031 |
| -0.1259145 | cg27091643 | 12 | 0.02014483 | 0.310574717 |
| -0.1254533 | cg26870745 | 19 | 0.01951888 | 0.208813002 |
| -0.1066272 | cg11852579 | 4  | 0.01887364 | 0.289566444 |
| -0.1712734 | cg15577373 | 2  | 0.00701258 | 0.277532445 |
| -0.1028936 | cg16436711 | 6  | 0.00242179 | 0.265776343 |
| -0.1720115 | cg25726077 | 4  | 0.00079873 | 0.2595324   |
| -0.1935174 | cg06902025 | 7  | 0.02937763 | 0.762104075 |
| -0.1472632 | cg23948811 | 17 | 0.01269347 | 0.786359695 |
| -0.1278383 | cg09010852 | 5  | 0.00339561 | 0.244624528 |
| -0.1207845 | cg05954780 | 15 | 0.01161236 | 0.870958939 |
| -0.1008809 | cg00605063 | 7  | 0.0036512  | 0.334779523 |
| -0.3017898 | cg16593333 | 12 | 0.0068583  | 0.850744838 |
| -0.2858365 | cg26451930 | 13 | 0.00538556 | 0.487502226 |
| -0.1172307 | cg22129180 | 8  | 0.00690015 | 0.74219961  |
| -0.1720716 | cg24889352 | 5  | 0.00224433 | 0.363419606 |
| -0.1024993 | cg00851303 | 16 | 0.03190048 | 0.436433126 |
| -0.1063308 | cg13812927 | 9  | 0.00459007 | 0.226198505 |
| -0.233817  | cg20232291 | 3  | 0.03102323 | 0.405217579 |

|            |            |    |            |             |
|------------|------------|----|------------|-------------|
| -0.1764077 | cg04934031 | 2  | 0.02263898 | 0.734918418 |
| -0.1590269 | cg22846991 | 10 | 0.047316   | 0.626859238 |
| -0.1363167 | cg20321319 | 8  | 0.00718675 | 0.413545198 |
| -0.1048984 | cg06372467 | 12 | 0.03487407 | 0.757008886 |
| -0.1006722 | cg14101940 | 2  | 0.02636183 | 0.649767667 |
| -0.1375837 | cg18015393 | 8  | 0.01718838 | 0.723346761 |
| -0.1003459 | cg24232083 | 7  | 0.01900937 | 0.474878327 |
| -0.1169391 | cg05483125 | 16 | 0.02291051 | 0.595455681 |
| -0.1020176 | cg09973284 | 12 | 0.00576623 | 0.578527151 |
| -0.1170553 | cg03373714 | 2  | 0.03333821 | 0.277116122 |
| -0.1587517 | cg08707456 | 11 | 0.00023192 | 0.527157006 |
| -0.1057113 | cg10717408 | 1  | 0.0257788  | 0.600407411 |
| -0.1572178 | cg13985234 | 5  | 0.03044339 | 0.335273252 |
| -0.100195  | cg01372939 | 16 | 0.00900911 | 0.826578012 |
| -0.1919494 | cg00405078 | 6  | 0.03464806 | 0.598181216 |
| -0.168881  | cg04026169 | 4  | 0.00904921 | 0.371453364 |
| -0.194641  | cg27125591 | 4  | 0.00077582 | 0.235145575 |
| -0.1903604 | cg18143317 | 11 | 0.027081   | 0.601243909 |
| -0.1505449 | cg18048655 | 17 | 0.02468215 | 0.702553782 |
| -0.1359468 | cg25793051 | 7  | 0.02221094 | 0.59399923  |
| -0.1130974 | cg16907101 | 13 | 0.02015361 | 0.455299967 |
| -0.1355675 | cg01044025 | 3  | 0.02504804 | 0.452775082 |
| -0.1726376 | cg19673233 | 14 | 0.00163778 | 0.431589561 |
| -0.139451  | cg10483261 | 7  | 0.01105864 | 0.406079806 |
| -0.1367228 | cg03880551 | 12 | 0.01476916 | 0.419681323 |
| -0.1138718 | cg20816104 | 2  | 0.03853988 | 0.376484646 |
| -0.1114419 | cg12136387 | 12 | 0.00230169 | 0.286901216 |
| -0.206846  | cg15202848 | 11 | 0.0172047  | 0.550131437 |
| -0.169477  | cg21141143 | 5  | 0.00757781 | 0.808303008 |
| -0.1467468 | cg13638983 | 3  | 0.012564   | 0.372422151 |
| -0.113869  | cg01571928 | 22 | 0.0413829  | 0.734382872 |
| -0.1107678 | cg17105814 | 4  | 0.00589982 | 0.808290384 |
| -0.1440131 | cg03436397 | 7  | 0.03827961 | 0.807444921 |
| -0.1126975 | cg00422995 | 2  | 0.00586547 | 0.478015266 |
| -0.2346993 | cg04276765 | 16 | 0.00575558 | 0.841923505 |
| -0.163577  | cg19290577 | 10 | 0.00180631 | 0.255702255 |
| -0.1017243 | cg07106169 | 2  | 0.01793418 | 0.565525936 |
| -0.1088153 | cg01273232 | 15 | 0.00070233 | 0.321835677 |
| -0.1334131 | cg05538118 | 16 | 0.04008442 | 0.486101015 |
| -0.1164174 | cg26980323 | 22 | 0.01251436 | 0.386612448 |
| -0.1098523 | cg19064304 | 15 | 0.04290783 | 0.724419041 |
| -0.1635267 | cg12689832 | 11 | 0.01595399 | 0.232346126 |
| -0.1172131 | cg15676988 | 11 | 0.04127486 | 0.170873271 |
| -0.1004559 | cg21591938 | 12 | 0.00222121 | 0.867900768 |
| -0.1230137 | cg17182817 | 10 | 0.0089379  | 0.827749174 |
| -0.1714741 | cg01556275 | 1  | 0.03603483 | 0.78482073  |



|            |            |    |            |             |
|------------|------------|----|------------|-------------|
| -0.188275  | cg04781580 | 14 | 0.01975353 | 0.799849234 |
| -0.1208123 | cg21566177 | 5  | 0.02089846 | 0.753214517 |
| -0.1033842 | cg01577029 | 12 | 0.03082235 | 0.574054561 |
| -0.107127  | cg22703113 | 4  | 0.03215717 | 0.662430913 |
| -0.1431386 | cg19313311 | 7  | 0.00565578 | 0.335077056 |
| -0.1429365 | cg20004315 | 12 | 0.00047665 | 0.286172616 |
| -0.1037029 | cg04565740 | 10 | 0.03751592 | 0.573653107 |
| -0.101308  | cg01695994 | 17 | 0.01212647 | 0.663953891 |
| -0.1582809 | cg01364674 | 1  | 0.01490159 | 0.551639713 |
| -0.2280778 | cg15711727 | 1  | 0.00758387 | 0.409699296 |
| -0.1870647 | cg15240033 | 6  | 0.01334818 | 0.814309221 |
| -0.1447506 | cg04929759 | 12 | 0.02605962 | 0.653814298 |
| -0.133854  | cg24603408 | 8  | 0.00654212 | 0.278720031 |
| -0.1062042 | cg12655542 | 2  | 0.00051245 | 0.259476835 |
| -0.162792  | cg17526036 | 5  | 0.02886667 | 0.404883673 |
| -0.1252587 | cg00187120 | 7  | 0.04043489 | 0.514233885 |
| -0.1111278 | cg04544267 | 7  | 0.00331668 | 0.799787905 |
| -0.1554703 | cg13543216 | 4  | 0.00033557 | 0.401508511 |
| -0.1177195 | cg15944060 | 5  | 0.02460223 | 0.553639224 |
| -0.114707  | cg20745381 | 1  | 0.00447527 | 0.307342743 |
| -0.1554407 | cg23426156 | 8  | 0.01622494 | 0.767199198 |
| -0.1957582 | cg04648334 | 6  | 0.00081702 | 0.69606989  |
| -0.1234061 | cg23357813 | 12 | 0.02453393 | 0.59660857  |
| -0.1052672 | cg07480446 | 2  | 0.03102024 | 0.794200453 |
| -0.1630949 | cg09098522 | 10 | 0.02003594 | 0.689305138 |
| -0.1105861 | cg04231042 | 4  | 0.03667528 | 0.837408014 |
| -0.1365917 | cg22716280 | 10 | 0.004821   | 0.537462736 |
| -0.1061746 | cg15977096 | 8  | 0.00110961 | 0.266972939 |
| -0.1474616 | cg14243817 | 9  | 0.0051635  | 0.276939094 |
| -0.1501136 | cg19936812 | 5  | 0.00811488 | 0.304172971 |
| -0.1477516 | cg02183025 | 2  | 0.03910617 | 0.43499286  |
| -0.1288063 | cg03152880 | 16 | 0.02811405 | 0.262947988 |
| -0.1459988 | cg26195829 | 14 | 0.01142799 | 0.684731891 |
| -0.1361515 | cg09533087 | 8  | 0.01263836 | 0.83157856  |
| -0.110738  | cg04611466 | 5  | 0.01728979 | 0.541724854 |
| -0.1695925 | cg04795387 | 12 | 0.0061174  | 0.436370424 |
| -0.1033126 | cg01583716 | 16 | 0.00043704 | 0.217016155 |
| -0.1083812 | cg13977235 | 19 | 0.00794825 | 0.782628084 |
| -0.1081258 | cg13786083 | 1  | 0.04400956 | 0.27318176  |
| -0.1014533 | cg22674577 | 3  | 0.0213826  | 0.706364423 |
| -0.1561017 | cg01218587 | 14 | 0.01216024 | 0.535635071 |
| -0.1486564 | cg25974380 | 14 | 0.00499952 | 0.412643525 |
| -0.1319772 | cg17177536 | 10 | 0.01724909 | 0.26451071  |
| -0.1241742 | cg19527959 | 6  | 0.00230169 | 0.767714194 |
| -0.1581714 | cg24680415 | 17 | 0.035946   | 0.744491784 |
| -0.2377815 | cg13014219 | 4  | 0.04485187 | 0.363274141 |

|            |            |    |            |             |
|------------|------------|----|------------|-------------|
| -0.2043865 | cg24599329 | 11 | 0.00843973 | 0.830391524 |
| -0.1264752 | cg03834467 | 2  | 0.02749442 | 0.781659525 |
| -0.2118748 | cg06610548 | 17 | 0.0058114  | 0.670691925 |
| -0.1437214 | cg17796461 | 15 | 0.04619249 | 0.478131873 |
| -0.1844224 | cg16242653 | 1  | 0.01314553 | 0.352530925 |
| -0.1299142 | cg09278098 | 12 | 0.00606967 | 0.229860497 |
| -0.1251485 | cg17367816 | 10 | 0.00380714 | 0.329370064 |
| -0.144061  | cg21138542 | 6  | 0.00069636 | 0.461826144 |
| -0.1019245 | cg09448460 | 2  | 0.0094938  | 0.289437395 |
| -0.1599109 | cg07979348 | 20 | 0.02805198 | 0.513071636 |
| -0.1462567 | cg12929160 | 13 | 0.01263935 | 0.862508494 |
| -0.1018157 | cg23047322 | 17 | 0.01592977 | 0.737763365 |
| -0.1582849 | cg26360402 | 14 | 0.03433232 | 0.691318195 |
| -0.1318628 | cg09128944 | 2  | 0.00942563 | 0.584844999 |
| -0.1378998 | cg18030960 | 4  | 0.00131168 | 0.291370343 |
| -0.1177948 | cg26587014 | 19 | 0.00879948 | 0.671597061 |
| -0.1107434 | cg15684661 | 5  | 0.04413232 | 0.525833525 |
| -0.190913  | cg05121006 | 4  | 0.01156187 | 0.236734738 |
| -0.1016433 | cg00421846 | 6  | 0.01017539 | 0.41919946  |
| -0.1328378 | cg07414643 | 4  | 0.03005757 | 0.88521187  |
| -0.2225992 | cg05820959 | 7  | 0.02099442 | 0.871744001 |
| -0.2136535 | cg07960922 | 7  | 0.00929055 | 0.530651798 |
| -0.1740456 | cg10621597 | 4  | 0.04144227 | 0.40163551  |
| -0.1413213 | cg17998530 | 22 | 0.00217777 | 0.35478281  |
| -0.138881  | cg05831315 | 8  | 0.00435719 | 0.725068526 |
| -0.1238617 | cg24996440 | 2  | 0.00778144 | 0.35335965  |
| -0.1195793 | cg06455180 | 10 | 0.01923718 | 0.659588427 |
| -0.10671   | cg11551464 | 8  | 0.01053351 | 0.846313239 |
| -0.1055934 | cg22347642 | 8  | 0.0363219  | 0.577942654 |
| -0.1013607 | cg14430614 | 13 | 0.0491997  | 0.788863232 |
| -0.1196463 | cg07371413 | 6  | 0.00581964 | 0.886374417 |
| -0.233633  | cg00318897 | 16 | 0.00069592 | 0.694436854 |
| -0.1447203 | cg14062119 | 12 | 0.00299387 | 0.74337265  |
| -0.1120966 | cg22266211 | 17 | 0.00878644 | 0.288850205 |
| -0.1096513 | cg11603406 | 7  | 0.01151954 | 0.577683776 |
| -0.1052226 | cg08850641 | 17 | 0.01847277 | 0.368688897 |
| -0.181904  | cg03760589 | 1  | 0.03212908 | 0.458347924 |
| -0.100399  | cg15402627 | 12 | 0.00438658 | 0.537039562 |
| -0.1765419 | cg19663246 | 7  | 0.04752833 | 0.568326894 |
| -0.11015   | cg04209579 | 2  | 0.00016884 | 0.768798789 |
| -0.1050107 | cg25616055 | 12 | 0.01451017 | 0.792079449 |
| -0.1182518 | cg03658699 | 19 | 0.01258811 | 0.431691717 |
| -0.1427769 | cg26690742 | 11 | 0.04725395 | 0.866597073 |
| -0.1387824 | cg00040590 | 22 | 0.03096392 | 0.660873931 |
| -0.1243349 | cg17898925 | 4  | 0.01590684 | 0.812807861 |
| -0.208097  | cg05935961 | 11 | 0.00159442 | 0.525346283 |

|            |            |    |            |             |
|------------|------------|----|------------|-------------|
| -0.1320752 | cg02162720 | 11 | 0.01694595 | 0.730207627 |
| -0.1035559 | cg23460961 | 11 | 0.01361436 | 0.774521395 |
| -0.1145273 | cg00406369 | 6  | 0.02339738 | 0.428330967 |
| -0.3517008 | cg16744314 | 20 | 0.00079752 | 0.574487468 |
| -0.2188446 | cg24687747 | 1  | 0.01954388 | 0.5012659   |
| -0.2147362 | cg09715059 | 6  | 0.02395758 | 0.294657763 |
| -0.1840321 | cg17367078 | 22 | 0.01362364 | 0.449793241 |
| -0.1555488 | cg04745064 | 6  | 0.0083623  | 0.744559377 |
| -0.1391364 | cg02772509 | 1  | 0.01886003 | 0.474819958 |
| -0.1192076 | cg05905844 | 7  | 0.01099399 | 0.677605387 |
| -0.1091324 | cg08506606 | 10 | 0.00176742 | 0.327324523 |
| -0.104495  | cg07744116 | 5  | 0.01353487 | 0.287129644 |
| -0.1366725 | cg04838191 | 2  | 0.00340646 | 0.888220934 |
| -0.1234349 | cg24499677 | 17 | 0.03183614 | 0.645227437 |
| -0.1092039 | cg24341911 | 21 | 0.02573406 | 0.657174465 |
| -0.1042316 | cg05945608 | 6  | 0.01307803 | 0.675913746 |
| -0.1027006 | cg11362820 | 15 | 0.00033811 | 0.316152044 |
| -0.1173734 | cg15688980 | 3  | 0.01350474 | 0.765340743 |
| -0.1173716 | cg17403995 | 1  | 0.01426404 | 0.719300302 |
| -0.1285447 | cg25175654 | 17 | 0.00788329 | 0.415875836 |
| -0.1218319 | cg24033633 | 3  | 0.00429784 | 0.837507754 |
| -0.100596  | cg07106766 | 3  | 0.01167673 | 0.75104424  |
| -0.1036386 | cg00290023 | 5  | 0.00791631 | 0.335830976 |
| -0.1120001 | cg02688118 | 13 | 0.02998091 | 0.56847542  |
| -0.1189722 | cg00649480 | 5  | 0.04175456 | 0.525683444 |
| -0.128347  | cg02216780 | 13 | 0.006265   | 0.536800753 |
| -0.1162807 | cg24217003 | 10 | 0.01108665 | 0.81003783  |
| -0.1509661 | cg13681496 | 9  | 0.02156861 | 0.444540723 |
| -0.1269135 | cg09461530 | 19 | 0.02807327 | 0.746813561 |
| -0.1977936 | cg22571135 | 7  | 0.01021777 | 0.781330692 |
| -0.1464872 | cg21766667 | 17 | 0.01224888 | 0.286927916 |
| -0.1148981 | cg01076970 | 5  | 0.02610388 | 0.29785224  |
| -0.2937771 | cg17150651 | 3  | 0.0183926  | 0.521654659 |
| -0.2192694 | cg04212047 | 6  | 0.0453094  | 0.470644607 |
| -0.1581585 | cg06598386 | 12 | 0.03130053 | 0.736143845 |
| -0.1222762 | cg18966152 | 1  | 0.01214342 | 0.902968995 |
| -0.1543386 | cg03573168 | 7  | 0.0199119  | 0.500585192 |
| -0.1744741 | cg26144458 | 21 | 0.00794383 | 0.771413811 |
| -0.167438  | cg03638905 | 5  | 0.00731018 | 0.645773002 |
| -0.1568085 | cg16855355 | 4  | 0.00572475 | 0.642687383 |
| -0.2133581 | cg07889505 | 15 | 0.00208547 | 0.315860549 |
| -0.1324423 | cg02367921 | 1  | 0.03250311 | 0.743461356 |
| -0.1833492 | cg13104775 | 4  | 0.048976   | 0.874646207 |
| -0.119353  | cg05607079 | 3  | 0.02624016 | 0.850343061 |
| -0.2123249 | cg15202213 | 11 | 0.0223079  | 0.635714812 |
| -0.2185869 | cg15921887 | 10 | 0.04475694 | 0.466954971 |

|            |            |    |            |             |
|------------|------------|----|------------|-------------|
| -0.2110373 | cg05269080 | 10 | 0.00878699 | 0.546071376 |
| -0.1611464 | cg05774229 | 11 | 0.0110047  | 0.497526417 |
| -0.1084499 | cg07533422 | 5  | 0.02164312 | 0.429975893 |
| -0.1830367 | cg15710143 | 17 | 0.02315161 | 0.454312818 |
| -0.2241987 | cg07126115 | 12 | 0.00169208 | 0.463035623 |
| -0.2057627 | cg08263708 | 6  | 9.29E-05   | 0.594441129 |
| -0.1648718 | cg10842008 | 1  | 0.00087062 | 0.355354135 |
| -0.1381555 | cg21293933 | 20 | 0.0263798  | 0.535095156 |
| -0.1615578 | cg22550229 | 18 | 0.03786119 | 0.483157724 |
| -0.1183475 | cg08415582 | 8  | 0.00603698 | 0.644538542 |
| -0.2209326 | cg26250400 | 19 | 0.00169399 | 0.349862868 |
| -0.1649842 | cg16224951 | 6  | 0.04923939 | 0.461989163 |
| -0.1282271 | cg21999591 | 20 | 0.00821935 | 0.551522763 |
| -0.1677731 | cg13772700 | 22 | 0.00283193 | 0.492378181 |
| -0.1376137 | cg23806894 | 4  | 0.00066183 | 0.214086927 |
| -0.1320718 | cg24369185 | 6  | 0.00682745 | 0.792065228 |
| -0.1166362 | cg15835542 | 6  | 0.01125706 | 0.243779816 |
| -0.1094337 | cg18606630 | 14 | 0.00012089 | 0.216110723 |
| -0.1058558 | cg25913612 | 10 | 0.03297625 | 0.800573111 |
| -0.1120018 | cg11937107 | 5  | 0.0372096  | 0.873471783 |
| -0.233746  | cg13911697 | 11 | 0.00137786 | 0.837226532 |
| -0.207693  | cg24028634 | 13 | 0.00509558 | 0.821550271 |
| -0.2055225 | cg02637247 | 16 | 0.00684618 | 0.758364809 |
| -0.1279555 | cg07181395 | 2  | 0.00562572 | 0.398647452 |
| -0.1543821 | cg00350158 | 11 | 0.03605661 | 0.734148379 |
| -0.1389296 | cg09238332 | 16 | 0.00237209 | 0.380379489 |
| -0.1652744 | cg01417849 | 6  | 0.00741339 | 0.56965152  |
| -0.1361653 | cg23381028 | 6  | 0.00079924 | 0.257449158 |
| -0.1965861 | cg16792071 | 10 | 0.00064755 | 0.464400105 |
| -0.1421953 | cg20023788 | 2  | 0.00657201 | 0.297387626 |
| -0.1220727 | cg12428160 | 10 | 0.00582835 | 0.446906057 |
| -0.1518851 | cg26090062 | 6  | 0.00856047 | 0.387755547 |
| -0.1083997 | cg04454285 | 16 | 0.00149918 | 0.64034715  |
| -0.1173997 | cg00032912 | 15 | 0.00036646 | 0.81590978  |
| -0.1001227 | cg16618789 | 7  | 0.00652131 | 0.666667275 |
| -0.1009517 | cg14571539 | 5  | 0.02784466 | 0.808406468 |
| -0.1780522 | cg06623017 | 15 | 0.02886667 | 0.567424945 |
| -0.1178617 | cg04028695 | 10 | 0.0400385  | 0.643217729 |
| -0.1024658 | cg12078913 | 13 | 0.00688625 | 0.546719346 |
| -0.1179357 | cg18112794 | 21 | 0.01074336 | 0.267511793 |
| -0.1698054 | cg05886620 | 7  | 0.00130505 | 0.345975263 |
| -0.1523488 | cg07376547 | 1  | 0.00017744 | 0.667110796 |
| -0.1820888 | cg22083053 | 4  | 0.02097059 | 0.549796199 |
| -0.1025483 | cg21184806 | 22 | 0.0062702  | 0.462203722 |
| -0.1143386 | cg11818193 | 2  | 0.00179083 | 0.340079437 |
| -0.1181338 | cg02463844 | 16 | 0.00904863 | 0.744253667 |

|            |                |    |            |             |
|------------|----------------|----|------------|-------------|
| -0.1117121 | cg16383005     | 6  | 0.02913849 | 0.582573788 |
| -0.2163789 | cg19787556     | 12 | 0.0347879  | 0.41438711  |
| -0.2339044 | cg19501909     | 22 | 0.00046123 | 0.258012897 |
| -0.1572885 | cg20373635     | 10 | 0.02418867 | 0.862808282 |
| -0.1904114 | cg08854586     | 13 | 0.00564622 | 0.461181652 |
| -0.1271518 | cg06461708     | 7  | 0.00851065 | 0.508650625 |
| -0.1215346 | cg06393830     | 6  | 0.02332056 | 0.733081931 |
| -0.1739263 | cg23426945     | 10 | 0.01030936 | 0.747692679 |
| -0.1260869 | cg15128679     | 5  | 0.00172134 | 0.234452408 |
| -0.1089965 | cg21981144     | 19 | 0.00870704 | 0.371465955 |
| -0.1012122 | cg14553377     | 11 | 0.01950603 | 0.537112252 |
| -0.1199867 | cg20948409     | 3  | 0.00545585 | 0.492472846 |
| -0.1675802 | cg19413066     | 17 | 0.00867623 | 0.379369736 |
| -0.1220219 | cg27305917     | 21 | 0.01130336 | 0.569831723 |
| -0.1480685 | cg26431163     | 15 | 0.00079396 | 0.372187295 |
| -0.1547548 | cg06739525     | 2  | 0.01603018 | 0.863317501 |
| -0.1528686 | cg02695609     | 7  | 0.00563195 | 0.261296493 |
| -0.1081136 | cg09398200     | 15 | 0.00450717 | 0.310154475 |
| -0.1058689 | cg07893738     | 4  | 0.04554733 | 0.800533403 |
| -0.1056402 | cg02736228     | 1  | 0.01744498 | 0.612253539 |
| -0.1092581 | cg09791366     | 1  | 0.00167327 | 0.721709144 |
| -0.110487  | cg07056079     | 6  | 0.01418084 | 0.259152891 |
| -0.1293067 | cg15415194     | 8  | 0.01237911 | 0.683841914 |
| -0.1056654 | cg01299082     | 4  | 0.02061629 | 0.570777492 |
| -0.1273996 | cg04267953     | 2  | 0.00090161 | 0.665560171 |
| -0.1339868 | cg03584506     | 11 | 0.04768133 | 0.450609404 |
| -0.141082  | cg08179817     | 4  | 0.0402713  | 0.639360462 |
| -0.1697105 | cg20203768     | 8  | 0.00014697 | 0.505066151 |
| -0.1623269 | cg00688895     | 7  | 0.01592409 | 0.373597754 |
| -0.1015216 | cg04041159     | 16 | 0.00416352 | 0.556680637 |
| -0.180274  | cg08098420     | 16 | 0.02508328 | 0.333447765 |
| -0.1371365 | cg12283695     | 15 | 0.02671115 | 0.44822969  |
| -0.12747   | cg02589685     | 11 | 0.02227376 | 0.715655098 |
| -0.1198212 | cg19185846     | 2  | 0.04972946 | 0.428015406 |
| -0.1757456 | cg15626881     | 7  | 0.02919478 | 0.62708773  |
| -0.2769996 | cg19442415     | 11 | 0.00120398 | 0.337069227 |
| -0.2070242 | cg01119145     | 20 | 0.0025211  | 0.600940846 |
| -0.1174874 | cg09998251     | 15 | 0.00123194 | 0.356174215 |
| -0.1772219 | cg21063275     | 15 | 0.0296078  | 0.592310607 |
| -0.1601579 | cg22626825     | 3  | 0.00094026 | 0.764533969 |
| -0.1062267 | ch.12.1274494R | 12 | 0.01353147 | 0.195629154 |
| -0.2189445 | cg16656520     | 6  | 0.04667465 | 0.506623509 |
| -0.1508032 | cg21616785     | 11 | 0.0005305  | 0.460951709 |
| -0.1076937 | cg05091585     | 13 | 0.02038352 | 0.510038628 |
| -0.1329823 | cg04033732     | 16 | 0.00049358 | 0.292046522 |
| -0.1170144 | cg16247269     | 5  | 0.01603098 | 0.602652775 |

|            |            |    |            |             |
|------------|------------|----|------------|-------------|
| -0.2418719 | cg17828456 | 17 | 0.02190893 | 0.346014931 |
| -0.1220638 | cg21167269 | 9  | 0.0326312  | 0.747106288 |
| -0.1135309 | cg08139512 | 11 | 0.00361561 | 0.647958782 |
| -0.1124241 | cg27094323 | 7  | 0.01980653 | 0.465092482 |
| -0.1555579 | cg06929449 | 16 | 0.00219305 | 0.393872222 |
| -0.1181624 | cg08893692 | 5  | 0.02305283 | 0.757442428 |
| -0.1010356 | cg02737458 | 16 | 0.01237977 | 0.289483791 |
| -0.1090181 | cg05990312 | 17 | 0.00840166 | 0.529483577 |
| -0.1860681 | cg25252017 | 6  | 0.00323529 | 0.838036277 |
| -0.1402303 | cg04439241 | 11 | 0.01099179 | 0.470277991 |
| -0.1328036 | cg18623980 | 2  | 0.02672017 | 0.634190985 |
| -0.1236377 | cg00874032 | 3  | 0.02130188 | 0.431809188 |
| -0.119101  | cg27223805 | 11 | 0.00795096 | 0.782251224 |
| -0.1180088 | cg13528289 | 4  | 0.01544981 | 0.690976578 |
| -0.1301273 | cg27464846 | 16 | 0.02000291 | 0.797581702 |
| -0.1468445 | cg18430895 | 5  | 0.0049169  | 0.745759229 |
| -0.1312054 | cg26629749 | 8  | 0.01128668 | 0.444477136 |
| -0.1791135 | cg13212080 | 14 | 0.00646227 | 0.537687151 |
| -0.2471276 | cg03078551 | 17 | 0.00160308 | 0.205169209 |
| -0.2372072 | cg04054921 | 11 | 0.04600191 | 0.722440838 |
| -0.1966179 | cg00766220 | 5  | 0.03788018 | 0.870698227 |
| -0.1550663 | cg02463513 | 3  | 0.01439445 | 0.884456223 |
| -0.1468013 | cg22328895 | 19 | 0.02146394 | 0.812611191 |
| -0.1463881 | cg26355232 | 2  | 0.00714011 | 0.728352803 |
| -0.1353111 | cg19500334 | 1  | 0.00626149 | 0.345378649 |
| -0.1333435 | cg25596082 | 10 | 0.00452709 | 0.428518137 |
| -0.1161999 | cg14311134 | 19 | 0.00455051 | 0.803801298 |
| -0.1154363 | cg12602909 | 3  | 0.03922042 | 0.505901106 |
| -0.1134662 | cg14833896 | 13 | 0.04861959 | 0.537275423 |
| -0.1113203 | cg25102726 | 5  | 0.00468559 | 0.462195457 |
| -0.1066646 | cg25616869 | 3  | 0.03411791 | 0.47476224  |
| -0.1001776 | cg26310285 | 7  | 0.00164227 | 0.77642365  |
| -0.100127  | cg08237521 | 16 | 0.00382775 | 0.814515954 |
| -0.1151147 | cg20848218 | 1  | 0.03121365 | 0.831206698 |
| -0.1899725 | cg20155035 | 1  | 0.03087092 | 0.822953996 |
| -0.1504375 | cg10991475 | 11 | 0.00761614 | 0.354603643 |
| -0.1220998 | cg06257058 | 7  | 0.00862821 | 0.544762734 |
| -0.1452603 | cg26763945 | 3  | 0.0251     | 0.79535096  |
| -0.1123753 | cg10858480 | 14 | 0.00043645 | 0.724110835 |
| -0.133197  | cg02375166 | 11 | 0.0369395  | 0.381054537 |
| -0.140328  | cg13827584 | 7  | 0.00514    | 0.309331398 |
| -0.122167  | cg16137564 | 14 | 0.03420715 | 0.908656831 |
| -0.1018804 | cg04103847 | 10 | 0.04736523 | 0.705264533 |
| -0.1031576 | cg26063904 | 1  | 0.00565164 | 0.800006713 |
| -0.1395641 | cg08037478 | 12 | 0.01418791 | 0.649084421 |
| -0.1118372 | cg00416400 | 13 | 0.03857653 | 0.669241398 |

|            |            |    |            |             |
|------------|------------|----|------------|-------------|
| -0.1092994 | cg08525429 | 7  | 0.02960142 | 0.477516007 |
| -0.1211664 | cg04457114 | 5  | 0.0206011  | 0.504921749 |
| -0.1598769 | cg03669175 | 19 | 0.01177423 | 0.446955318 |
| -0.124345  | cg10120652 | 8  | 0.00648924 | 0.875164506 |
| -0.1937347 | cg11465404 | 15 | 0.03281267 | 0.471005037 |
| -0.2422487 | cg12869949 | 5  | 0.00037718 | 0.332343844 |
| -0.1336507 | cg16735495 | 7  | 0.01863778 | 0.396640129 |
| -0.114484  | cg26392708 | 10 | 0.00050073 | 0.35469433  |
| -0.1168015 | cg19489320 | 7  | 0.03160736 | 0.608343912 |
| -0.1158537 | cg11165752 | 7  | 0.01199982 | 0.816043215 |
| -0.1288517 | cg02975243 | 16 | 0.00864017 | 0.744271615 |
| -0.1147376 | cg08772796 | 5  | 0.02669681 | 0.303518298 |
| -0.1268602 | cg09693588 | 3  | 0.0059537  | 0.82244258  |
| -0.2273207 | cg05722692 | 16 | 0.0378874  | 0.545350073 |
| -0.1989833 | cg11633080 | 7  | 0.02502486 | 0.671558264 |
| -0.1815707 | cg07783843 | 2  | 0.01051334 | 0.8662674   |
| -0.1780723 | cg15805490 | 19 | 0.02672176 | 0.674065812 |
| -0.1275885 | cg16856734 | 20 | 0.02258276 | 0.766459064 |
| -0.1858701 | cg14127046 | 2  | 0.0264292  | 0.859344075 |
| -0.1432583 | cg22579114 | 7  | 0.00360738 | 0.643652907 |
| -0.1276744 | cg04572258 | 2  | 0.04183189 | 0.671254378 |
| -0.1275751 | cg10368834 | 16 | 0.0176735  | 0.641491668 |
| -0.124812  | cg23209016 | 17 | 0.00201933 | 0.306368909 |
| -0.113456  | cg15626112 | 8  | 0.00722567 | 0.754164135 |
| -0.1340371 | cg22146612 | 6  | 0.02966213 | 0.733043259 |
| -0.1631663 | cg03427663 | 16 | 0.00116429 | 0.282946087 |
| -0.1409567 | cg14480446 | 5  | 0.03099674 | 0.36864009  |
| -0.1781332 | cg13824877 | 6  | 0.0043228  | 0.714549251 |
| -0.1867575 | cg26550214 | 5  | 0.01129799 | 0.229702282 |
| -0.1700379 | cg27248699 | 11 | 0.0219344  | 0.326620496 |
| -0.1625212 | cg03376308 | 10 | 0.00478913 | 0.812305153 |
| -0.1610027 | cg05796504 | 16 | 0.00656243 | 0.524228609 |
| -0.1166981 | cg03466587 | 3  | 0.02035172 | 0.288357703 |
| -0.1599017 | cg21620078 | 5  | 0.0079422  | 0.685891106 |
| -0.1144593 | cg19604907 | 12 | 0.00427389 | 0.285711181 |
| -0.1636432 | cg24505713 | 11 | 0.01168792 | 0.352522155 |
| -0.1253919 | cg22924563 | 19 | 0.04553677 | 0.408046342 |
| -0.1372507 | cg04871472 | 2  | 0.02624655 | 0.779202587 |
| -0.1595626 | cg20507963 | 4  | 0.01758386 | 0.879116566 |
| -0.1517243 | cg24465329 | 2  | 0.04100273 | 0.53839211  |
| -0.166682  | cg25699073 | 6  | 0.03497117 | 0.885076535 |
| -0.1539095 | cg07320695 | 4  | 0.00994013 | 0.366482301 |
| -0.112613  | cg18703515 | 10 | 0.00160315 | 0.779908322 |
| -0.1063717 | cg24735210 | 7  | 0.00917536 | 0.717916927 |
| -0.1163655 | cg26706803 | 16 | 0.00710209 | 0.27624593  |
| -0.132751  | cg21922810 | 1  | 0.03728073 | 0.345349232 |

|            |            |    |            |             |
|------------|------------|----|------------|-------------|
| -0.1721728 | cg11178337 | 17 | 0.0033222  | 0.483636503 |
| -0.1430349 | cg14830371 | 8  | 0.00213753 | 0.220253796 |
| -0.1245234 | cg19726711 | 10 | 0.03336868 | 0.47509124  |
| -0.1168413 | cg23091549 | 1  | 0.04302273 | 0.698766354 |
| -0.1974846 | cg22250531 | 12 | 0.00799087 | 0.844083281 |
| -0.1821294 | cg13636952 | 7  | 0.00872069 | 0.311031098 |
| -0.1795306 | cg26864230 | 1  | 0.04094948 | 0.597347183 |
| -0.1390037 | cg04466484 | 16 | 0.00320099 | 0.345605126 |
| -0.1370357 | cg15471388 | 14 | 0.01643533 | 0.825704264 |
| -0.1208454 | cg13413982 | 13 | 0.0208783  | 0.875059794 |
| -0.1056182 | cg25606969 | 1  | 0.03161361 | 0.692783471 |
| -0.1031112 | cg13183298 | 1  | 0.03361886 | 0.657242843 |
| -0.1762252 | cg06520521 | 11 | 0.00310418 | 0.246565814 |
| -0.1229926 | cg04717485 | 1  | 0.01195322 | 0.63878918  |
| -0.114892  | cg26152419 | 2  | 0.03675579 | 0.261522514 |
| -0.1226841 | cg15547143 | 10 | 0.01468505 | 0.810654228 |
| -0.1698086 | cg10859844 | 14 | 0.00541113 | 0.469314338 |
| -0.1210449 | cg19412900 | 2  | 0.00010658 | 0.635695801 |
| -0.1915721 | cg21286117 | 17 | 0.00920094 | 0.777386825 |
| -0.1649523 | cg18107094 | 8  | 0.02570768 | 0.326477218 |
| -0.2601308 | cg13076829 | 18 | 0.02474186 | 0.421328878 |
| -0.1231297 | cg15786827 | 12 | 0.00512704 | 0.42468295  |
| -0.1059746 | cg15029032 | 15 | 0.0087058  | 0.771252602 |
| -0.1019136 | cg13464240 | 9  | 0.01646542 | 0.709467704 |
| -0.1821426 | cg15750501 | 2  | 0.00592233 | 0.274099432 |
| -0.1838763 | cg02152128 | 1  | 0.00034495 | 0.322929915 |
| -0.1522612 | cg16844333 | 10 | 0.00495971 | 0.304992782 |
| -0.1786646 | cg06508867 | 16 | 0.03468387 | 0.832000873 |
| -0.1147858 | cg11404945 | 1  | 0.01874552 | 0.596138417 |
| -0.1352638 | cg22971157 | 5  | 0.04899741 | 0.741547652 |
| -0.1129546 | cg11611580 | 6  | 0.02580382 | 0.481371897 |
| -0.1016288 | cg01166759 | 17 | 0.03975239 | 0.436785812 |
| -0.1365714 | cg02535674 | 20 | 0.00424077 | 0.289241616 |
| -0.1237055 | cg20343114 | 22 | 0.01850321 | 0.470614659 |
| -0.1884414 | cg25414639 | 15 | 0.00708549 | 0.855286424 |
| -0.1832827 | cg01686975 | 7  | 0.00754018 | 0.783254407 |
| -0.116098  | cg06208158 | 16 | 0.0201358  | 0.483954941 |
| -0.1047182 | cg19440115 | 15 | 0.00597662 | 0.601144213 |
| -0.1172063 | cg14542554 | 14 | 0.03093234 | 0.672423655 |
| -0.1499994 | cg04526480 | 1  | 0.04446714 | 0.405230115 |
| -0.1168839 | cg01511901 | 13 | 0.00082316 | 0.241566827 |
| -0.2627444 | cg10442325 | 2  | 0.03655059 | 0.605859553 |
| -0.2090264 | cg16428517 | 16 | 0.00462371 | 0.655046356 |
| -0.1732609 | cg22840361 | 15 | 0.0002921  | 0.874929374 |
| -0.1042199 | cg16226866 | 6  | 0.0449041  | 0.80347183  |
| -0.1392755 | cg01269299 | 10 | 0.03498432 | 0.77181367  |



|            |            |    |            |             |
|------------|------------|----|------------|-------------|
| -0.1461906 | cg02434314 | 17 | 0.00690061 | 0.717066712 |
| -0.1208927 | cg20562574 | 4  | 0.02694477 | 0.33326176  |
| -0.1188849 | cg06351870 | 16 | 0.01403025 | 0.68305075  |
| -0.2306783 | cg26829098 | 1  | 0.00314371 | 0.29849252  |
| -0.1221796 | cg00687073 | 8  | 0.0402115  | 0.559899519 |
| -0.1344647 | cg03022263 | 14 | 0.00693639 | 0.622466318 |
| -0.133654  | cg06792126 | 15 | 0.03574881 | 0.363162848 |
| -0.1233199 | cg14147832 | 14 | 0.00656912 | 0.506158227 |
| -0.1175815 | cg22453826 | 6  | 0.00469565 | 0.601054703 |
| -0.24756   | cg20969424 | 5  | 0.0330201  | 0.84136602  |
| -0.1762779 | cg02312715 | 5  | 0.00977973 | 0.827922306 |
| -0.1539434 | cg25083933 | 12 | 0.00582694 | 0.74651585  |
| -0.1410689 | cg07214920 | 2  | 0.01293187 | 0.882629    |
| -0.1062971 | cg18403852 | 21 | 0.04616722 | 0.630668081 |
| -0.1284509 | cg16228365 | 17 | 0.00527546 | 0.602108605 |
| -0.219646  | cg07972716 | 20 | 0.03703311 | 0.437831146 |
| -0.1715945 | cg15964159 | 13 | 0.02397095 | 0.810078141 |
| -0.1685046 | cg21141329 | 17 | 0.00511385 | 0.790816639 |
| -0.1268657 | cg01219347 | 2  | 0.0005371  | 0.344500535 |
| -0.107665  | cg06635351 | 1  | 0.00036469 | 0.181501734 |
| -0.1138094 | cg07586760 | 22 | 0.02986351 | 0.577033674 |
| -0.1063923 | cg15969890 | 12 | 0.02986977 | 0.937406867 |
| -0.1243352 | cg21561953 | 7  | 0.0311294  | 0.55094427  |
| -0.1226546 | cg00609961 | 6  | 0.03623942 | 0.486163256 |
| -0.1331684 | cg15463580 | 19 | 0.02482943 | 0.569946268 |
| -0.2783831 | cg02032299 | 16 | 0.00825592 | 0.765261748 |
| -0.1120398 | cg25292309 | 2  | 0.01802836 | 0.657103966 |
| -0.1036289 | cg00130342 | 17 | 0.00394798 | 0.696128115 |
| -0.1619082 | cg06907356 | 21 | 0.01070563 | 0.37392862  |
| -0.1591988 | cg18001983 | 6  | 0.0316551  | 0.684875039 |
| -0.1229821 | cg19449948 | 15 | 0.01156455 | 0.77312966  |
| -0.1160656 | cg14199961 | 9  | 0.00078582 | 0.21600721  |
| -0.1217197 | cg13718418 | 12 | 0.0013679  | 0.662603841 |
| -0.1350935 | cg03994891 | 6  | 0.00747078 | 0.63883948  |
| -0.1412896 | cg06092869 | 1  | 0.00136459 | 0.311328623 |
| -0.2222276 | cg24611351 | 2  | 0.02300314 | 0.555660453 |
| -0.1270266 | cg10419556 | 8  | 0.04738274 | 0.452613932 |
| -0.1432472 | cg08584947 | 8  | 0.00123362 | 0.819596851 |
| -0.1446503 | cg04963553 | 16 | 0.03584943 | 0.61003018  |
| -0.1453762 | cg11284842 | 5  | 0.03147957 | 0.514562589 |
| -0.1174962 | cg20724214 | 3  | 0.04031258 | 0.336148926 |
| -0.105541  | cg11013714 | 3  | 0.01030429 | 0.74332913  |
| -0.1012673 | cg24796998 | 17 | 0.04068577 | 0.325846734 |
| -0.1782572 | cg22881652 | 4  | 0.00131652 | 0.66560517  |
| -0.1765433 | cg04657325 | 4  | 0.01603469 | 0.248979742 |
| -0.1605652 | cg08911852 | 16 | 0.00276644 | 0.271762924 |

|            |            |    |            |             |
|------------|------------|----|------------|-------------|
| -0.1330968 | cg16044050 | 6  | 0.01652798 | 0.751228687 |
| -0.1241867 | cg20783464 | 4  | 0.03237042 | 0.681781526 |
| -0.1712545 | cg10589330 | 15 | 0.00865996 | 0.762041601 |
| -0.1463388 | cg17727929 | 21 | 0.00520258 | 0.367065419 |
| -0.1376357 | cg19265300 | 15 | 0.00371998 | 0.434287907 |
| -0.1225259 | cg27594683 | 6  | 0.00599741 | 0.327457821 |
| -0.1191769 | cg10151901 | 15 | 0.01578589 | 0.782560581 |
| -0.1152276 | cg17438030 | 5  | 0.01260025 | 0.828292747 |
| -0.1128539 | cg03972891 | 2  | 0.0039877  | 0.832096581 |
| -0.1559002 | cg03831405 | 7  | 0.0297114  | 0.686282015 |
| -0.1251623 | cg03718241 | 6  | 0.00273182 | 0.762842755 |
| -0.1142045 | cg05850870 | 2  | 0.02419364 | 0.8445164   |
| -0.1030741 | cg05558615 | 17 | 0.01057849 | 0.743919747 |
| -0.1568555 | cg08433492 | 5  | 0.02942508 | 0.831061712 |
| -0.1511812 | cg02307239 | 4  | 0.00275792 | 0.406918418 |
| -0.12282   | cg01413671 | 16 | 0.02770793 | 0.769417423 |
| -0.1659285 | cg07747871 | 19 | 0.01738521 | 0.469207384 |
| -0.1024954 | cg27327911 | 16 | 0.00051439 | 0.280881575 |
| -0.1547043 | cg05937055 | 1  | 0.03801362 | 0.530804897 |
| -0.1392046 | cg25050392 | 6  | 0.01165628 | 0.864954604 |
| -0.1208655 | cg07851290 | 2  | 0.00750603 | 0.387120671 |
| -0.16251   | cg13423054 | 3  | 0.03950047 | 0.773295905 |
| -0.1006022 | cg26685596 | 2  | 0.02275971 | 0.688377457 |
| -0.2591581 | cg26300517 | 4  | 0.01994708 | 0.844606154 |
| -0.2443399 | cg09464466 | 2  | 0.00493714 | 0.854794998 |
| -0.2012152 | cg04871726 | 1  | 0.00451784 | 0.47367401  |
| -0.1486662 | cg10272977 | 6  | 0.0042277  | 0.398817517 |
| -0.1681651 | cg03671431 | 18 | 0.03532144 | 0.409100767 |
| -0.1274362 | cg02698900 | 8  | 0.0237442  | 0.375928956 |
| -0.1102796 | cg08424981 | 11 | 0.04691102 | 0.811278437 |
| -0.1623154 | cg25326509 | 6  | 0.03566213 | 0.809285942 |
| -0.1151209 | cg05405914 | 16 | 0.00402923 | 0.433193573 |
| -0.1072839 | cg06318624 | 2  | 0.00118455 | 0.742535265 |
| -0.1536584 | cg01574513 | 16 | 0.00214919 | 0.832966476 |
| -0.1428877 | cg02004632 | 11 | 0.02230324 | 0.484648499 |
| -0.1457805 | cg19800032 | 7  | 0.04707888 | 0.505089116 |
| -0.1319472 | cg19490678 | 11 | 0.00108726 | 0.383820932 |
| -0.1080721 | cg25625514 | 11 | 0.02407262 | 0.655814558 |
| -0.1045091 | cg19893132 | 12 | 0.01960395 | 0.325747924 |
| -0.1154078 | cg04481603 | 10 | 0.02416185 | 0.535691151 |
| -0.126943  | cg05942964 | 13 | 0.04434418 | 0.451598019 |
| -0.1251604 | cg10839823 | 4  | 0.00433438 | 0.405259169 |
| -0.1586843 | cg01756424 | 3  | 0.00725893 | 0.522069783 |
| -0.1306306 | cg13306815 | 6  | 0.02655444 | 0.764579358 |
| -0.169968  | cg08149546 | 11 | 0.04717674 | 0.472095651 |
| -0.1180093 | cg12895857 | 6  | 0.02216999 | 0.716342144 |

|            |            |    |            |             |
|------------|------------|----|------------|-------------|
| -0.2331739 | cg16442298 | 8  | 0.00406484 | 0.58038141  |
| -0.1450805 | cg06740372 | 3  | 0.03688536 | 0.727336765 |
| -0.1049207 | cg00802386 | 7  | 0.03713619 | 0.847510208 |
| -0.1032568 | cg03500164 | 17 | 0.03731998 | 0.815997641 |
| -0.1068528 | cg17606155 | 21 | 0.01577823 | 0.358483739 |
| -0.1514116 | cg14897838 | 17 | 0.00022029 | 0.350163009 |
| -0.1200336 | cg01185573 | 3  | 0.01095825 | 0.642226957 |
| -0.1099158 | cg14453187 | 2  | 0.00906754 | 0.817658766 |
| -0.1729999 | cg12422351 | 1  | 0.03462886 | 0.756126964 |
| -0.119825  | cg16576569 | 1  | 0.0009705  | 0.86488992  |
| -0.1016958 | cg20965866 | 4  | 0.00222195 | 0.860184368 |
| -0.1575648 | cg01830154 | 17 | 0.0461417  | 0.411677493 |
| -0.2535403 | cg07352859 | 16 | 0.04512485 | 0.566348836 |
| -0.1891434 | cg15396800 | 1  | 0.0030781  | 0.401078593 |
| -0.1624893 | cg14016418 | 2  | 0.03105382 | 0.333472349 |
| -0.1334334 | cg14927712 | 2  | 0.00925044 | 0.379367374 |
| -0.118787  | cg00901878 | 13 | 0.01595265 | 0.755087161 |
| -0.1182284 | cg25774608 | 12 | 0.04845425 | 0.466312601 |
| -0.1161416 | cg04805577 | 7  | 0.0149662  | 0.871768308 |
| -0.133266  | cg04419547 | 13 | 0.01340611 | 0.827887969 |
| -0.1328131 | cg23787937 | 12 | 0.01652217 | 0.724790517 |
| -0.2118071 | cg10418997 | 5  | 0.03152169 | 0.313745623 |
| -0.1362222 | cg10755035 | 8  | 0.00866741 | 0.381240398 |
| -0.1102169 | cg05084525 | 8  | 0.00541773 | 0.633198691 |
| -0.1029448 | cg24341406 | 20 | 0.0133363  | 0.608899124 |
| -0.2185707 | cg05387269 | 1  | 0.01371913 | 0.461643863 |
| -0.2015829 | cg04918695 | 6  | 0.00266785 | 0.888910079 |
| -0.1932628 | cg21563912 | 10 | 0.02426019 | 0.930844699 |
| -0.1700044 | cg12253071 | 4  | 0.02679078 | 0.703192512 |
| -0.111484  | cg20928238 | 14 | 0.01001772 | 0.476392316 |
| -0.1010821 | cg21952052 | 1  | 0.00668008 | 0.301178863 |
| -0.1006163 | cg11718312 | 6  | 0.02000601 | 0.392060052 |
| -0.2394232 | cg10436833 | 1  | 0.02839025 | 0.775651587 |
| -0.1336326 | cg21140898 | 1  | 0.03797683 | 0.55425897  |
| -0.1337276 | cg06728135 | 5  | 0.00056503 | 0.284822258 |
| -0.1167288 | cg03548415 | 11 | 0.03919068 | 0.382736083 |
| -0.1046104 | cg12171761 | 8  | 0.00680299 | 0.59964543  |
| -0.2903166 | cg11353598 | 15 | 0.00905266 | 0.751366913 |
| -0.1859832 | cg25446061 | 2  | 0.00237814 | 0.384265657 |
| -0.1251313 | cg00960906 | 5  | 0.03644028 | 0.398659125 |
| -0.154339  | cg04774770 | 5  | 0.01274808 | 0.518274225 |
| -0.1433533 | cg24053992 | 1  | 0.01302508 | 0.713691066 |
| -0.1964519 | cg23346622 | 7  | 0.00291425 | 0.291130288 |
| -0.1088585 | cg24530432 | 4  | 0.01614627 | 0.613374318 |
| -0.1396901 | cg27475169 | 11 | 0.00103733 | 0.706256969 |
| -0.1017213 | cg18117039 | 14 | 0.03022235 | 0.876015215 |

|            |            |    |            |             |
|------------|------------|----|------------|-------------|
| -0.1906164 | cg20368377 | 13 | 0.03967595 | 0.755091964 |
| -0.1027029 | cg20491991 | 1  | 0.00683707 | 0.633183307 |
| -0.1762711 | cg08162465 | 1  | 0.0329847  | 0.863712913 |
| -0.1030412 | cg00092443 | 20 | 0.03018837 | 0.77044001  |
| -0.144361  | cg01004063 | 14 | 0.00486443 | 0.466315413 |
| -0.1593895 | cg05729745 | 22 | 0.00793491 | 0.594728823 |
| -0.1237826 | cg06853836 | 6  | 0.01579126 | 0.52776791  |
| -0.1199528 | cg26727231 | 8  | 0.01937381 | 0.564255444 |
| -0.1661659 | cg13487127 | 9  | 0.00018505 | 0.641258732 |
| -0.1575474 | cg15134714 | 8  | 0.00769487 | 0.473964316 |
| -0.1016617 | cg02229757 | 16 | 0.01155271 | 0.266345708 |
| -0.1123293 | cg03215050 | 11 | 0.00936392 | 0.8133252   |
| -0.1902325 | cg16518996 | 16 | 0.02913528 | 0.645715142 |
| -0.1890675 | cg01329973 | 16 | 0.00297231 | 0.474338334 |
| -0.1394699 | cg21249091 | 2  | 0.04233456 | 0.444434331 |
| -0.1042356 | cg07121900 | 13 | 0.01813562 | 0.477992715 |
| -0.1630531 | cg13468767 | 17 | 0.03192209 | 0.293222764 |
| -0.1470139 | cg13257654 | 8  | 0.01330164 | 0.875849437 |
| -0.155494  | cg22581352 | 8  | 0.00504095 | 0.462749793 |
| -0.1016461 | cg06049381 | 17 | 0.01471656 | 0.349324637 |
| -0.1224936 | cg17389956 | 12 | 0.01756936 | 0.29409258  |
| -0.1508332 | cg02291365 | 13 | 0.0227378  | 0.775700642 |
| -0.113377  | cg13496662 | 19 | 0.03936223 | 0.552932129 |
| -0.1339281 | cg22022821 | 11 | 0.00082316 | 0.84719564  |
| -0.1253424 | cg23207542 | 2  | 0.00417309 | 0.6351132   |
| -0.1306178 | cg26645655 | 3  | 0.02377288 | 0.752306159 |
| -0.1571576 | cg00607194 | 12 | 0.04889067 | 0.733807832 |
| -0.1218147 | cg12630938 | 10 | 0.00303835 | 0.626320329 |
| -0.1194811 | cg05511755 | 5  | 0.00798206 | 0.687026917 |
| -0.1237862 | cg00673344 | 3  | 0.01866151 | 0.651249643 |
| -0.2305737 | cg12165551 | 11 | 0.02452391 | 0.637060216 |
| -0.1825823 | cg02489769 | 12 | 0.01840667 | 0.762745836 |
| -0.1634291 | cg11612647 | 10 | 0.00046861 | 0.310951234 |
| -0.1360677 | cg07081245 | 11 | 0.04961333 | 0.522831461 |
| -0.1323539 | cg15274309 | 11 | 0.0013108  | 0.842886659 |
| -0.126374  | cg22460896 | 15 | 0.00030547 | 0.770708508 |
| -0.1213254 | cg26508928 | 18 | 0.02632381 | 0.656154942 |
| -0.116382  | cg19145082 | 3  | 0.00677131 | 0.297732409 |
| -0.1138936 | cg03813377 | 6  | 0.01237645 | 0.339739436 |
| -0.1131378 | cg07486821 | 16 | 0.01041572 | 0.581974001 |
| -0.1064431 | cg01373819 | 15 | 0.03719175 | 0.548258532 |
| -0.1013805 | cg09817162 | 6  | 0.02077689 | 0.736229481 |
| -0.1566308 | cg25016544 | 5  | 0.00939271 | 0.347968285 |
| -0.1484422 | cg04268211 | 7  | 0.01162655 | 0.492725957 |
| -0.1084876 | cg13057055 | 17 | 0.03037921 | 0.465895584 |
| -0.1041012 | cg25101863 | 11 | 0.00025576 | 0.416722538 |

|            |            |    |            |             |
|------------|------------|----|------------|-------------|
| -0.1460161 | cg14204462 | 1  | 0.01492335 | 0.626682878 |
| -0.2326266 | cg16347123 | 7  | 0.00113056 | 0.349802611 |
| -0.1134599 | cg18269963 | 4  | 0.02385018 | 0.875750963 |
| -0.1849661 | cg21146170 | 8  | 0.01263305 | 0.687956778 |
| -0.1715624 | cg20697025 | 7  | 0.0436117  | 0.530673941 |
| -0.1922268 | cg16644967 | 16 | 0.04873137 | 0.840984952 |
| -0.1042189 | cg08117745 | 20 | 0.00506296 | 0.837209386 |
| -0.1192835 | cg20546570 | 22 | 0.00496778 | 0.45421015  |
| -0.1338419 | cg11141696 | 1  | 0.00343052 | 0.86809167  |
| -0.1698133 | cg14996583 | 13 | 0.01156187 | 0.445655478 |
| -0.1510192 | cg19110428 | 20 | 0.00436089 | 0.723755443 |
| -0.197912  | cg09558425 | 10 | 0.04072963 | 0.589456071 |
| -0.1072417 | cg02931464 | 12 | 0.00034186 | 0.276677848 |
| -0.2515057 | cg14428628 | 17 | 0.00344864 | 0.780692145 |
| -0.1286666 | cg18016304 | 15 | 0.03185962 | 0.637661521 |
| -0.1742017 | cg19998151 | 11 | 0.00280912 | 0.380627291 |
| -0.116157  | cg19952651 | 14 | 0.01096266 | 0.806467099 |
| -0.1258465 | cg11661534 | 3  | 0.01376109 | 0.330980903 |
| -0.1392039 | cg00210839 | 7  | 0.00077158 | 0.738914964 |
| -0.1547414 | cg04528720 | 16 | 0.02875068 | 0.706572442 |
| -0.1235769 | cg19684783 | 5  | 0.04216221 | 0.743171674 |
| -0.2151029 | cg18019509 | 6  | 0.04124193 | 0.755621319 |
| -0.2011861 | cg02453013 | 16 | 0.01871651 | 0.700635286 |
| -0.1864707 | cg18063495 | 5  | 0.01990676 | 0.231180263 |
| -0.1148423 | cg07675647 | 12 | 0.02361575 | 0.555612592 |
| -0.1315754 | cg19634252 | 4  | 0.00772244 | 0.493337803 |
| -0.1545696 | cg16580197 | 8  | 0.01312541 | 0.725056725 |
| -0.1088822 | cg18890461 | 6  | 0.00170408 | 0.306026015 |
| -0.2677073 | cg08375396 | 11 | 0.03426162 | 0.785382296 |
| -0.2001919 | cg04239548 | 1  | 0.01726073 | 0.781799514 |
| -0.1787253 | cg03148184 | 4  | 0.00024097 | 0.253173862 |
| -0.1377698 | cg06618356 | 16 | 0.00666773 | 0.727252089 |
| -0.1337985 | cg06615816 | 3  | 0.00794547 | 0.492101821 |
| -0.1078442 | cg03720745 | 8  | 0.01133732 | 0.501420247 |
| -0.1609925 | cg00169897 | 16 | 0.03948248 | 0.735769473 |
| -0.1611114 | cg11088672 | 4  | 0.01975353 | 0.621307357 |
| -0.1554001 | cg02992762 | 7  | 0.00086785 | 0.325428185 |
| -0.116611  | cg15034300 | 2  | 0.00082915 | 0.330354565 |
| -0.2037875 | cg20068510 | 15 | 0.01839689 | 0.83678325  |
| -0.2006888 | cg08090407 | 7  | 0.00086449 | 0.229223292 |
| -0.1070324 | cg14236118 | 4  | 0.0237915  | 0.814185868 |
| -0.1519374 | cg10513595 | 5  | 0.04013595 | 0.775340133 |
| -0.1003196 | cg00176043 | 1  | 0.02558263 | 0.37839546  |
| -0.2054913 | cg10208132 | 4  | 0.00637314 | 0.90571561  |
| -0.1072849 | cg17709804 | 11 | 0.03052273 | 0.744987675 |
| -0.1213223 | cg12332674 | 6  | 0.00725793 | 0.826609721 |

|            |            |    |            |             |
|------------|------------|----|------------|-------------|
| -0.1649848 | cg06213763 | 1  | 0.02614448 | 0.432499013 |
| -0.1217928 | cg14799457 | 18 | 0.03149202 | 0.539525333 |
| -0.1036831 | cg20465333 | 22 | 0.04022649 | 0.494908205 |
| -0.1093275 | cg09063683 | 5  | 0.00823081 | 0.363105887 |
| -0.1376152 | cg20223392 | 8  | 0.04941873 | 0.689368057 |
| -0.1248672 | cg01232121 | 8  | 0.032546   | 0.77530776  |
| -0.1916099 | cg11539857 | 6  | 0.04935004 | 0.782046251 |
| -0.1211923 | cg12630576 | 1  | 0.0130544  | 0.858917265 |
| -0.1261135 | cg21249152 | 13 | 0.04605923 | 0.619669589 |
| -0.1670095 | cg15507690 | 3  | 0.04177289 | 0.737410165 |
| -0.103003  | cg05700789 | 16 | 0.00097836 | 0.758250365 |
| -0.1760605 | cg26110991 | 21 | 0.02401304 | 0.693843642 |
| -0.1040684 | cg16709734 | 7  | 0.00148041 | 0.525476596 |
| -0.1326382 | cg02003460 | 5  | 0.00475167 | 0.688100959 |
| -0.115486  | cg25539979 | 15 | 0.00087579 | 0.237412598 |
| -0.2423481 | cg16761754 | 14 | 0.04186454 | 0.789691134 |
| -0.1489778 | cg15222329 | 5  | 0.0003092  | 0.398118245 |
| -0.128789  | cg07548791 | 16 | 0.00251923 | 0.457806222 |
| -0.1046565 | cg23500924 | 5  | 0.03183468 | 0.390379457 |
| -0.1029824 | cg09416512 | 19 | 0.01550282 | 0.742347577 |
| -0.1173875 | cg22304705 | 2  | 0.04188882 | 0.829824015 |
| -0.1138721 | cg04156889 | 3  | 0.00037787 | 0.253248877 |
| -0.1898059 | cg14076231 | 1  | 0.00593613 | 0.455244654 |
| -0.1743782 | cg02987523 | 13 | 0.01039115 | 0.841547212 |
| -0.1395954 | cg00486280 | 15 | 0.00823662 | 0.552985428 |
| -0.1372759 | cg05693204 | 5  | 0.01239427 | 0.606059503 |
| -0.1270502 | cg10259521 | 15 | 0.03118593 | 0.621228207 |
| -0.1226162 | cg18747408 | 10 | 0.02688465 | 0.76962596  |
| -0.1182135 | cg26621088 | 5  | 0.02198913 | 0.720947236 |
| -0.1164035 | cg08702879 | 10 | 0.02428736 | 0.665143235 |
| -0.1384907 | cg13758186 | 2  | 0.04109498 | 0.481456365 |
| -0.1650289 | cg06498232 | 3  | 0.00053158 | 0.256149761 |
| -0.1077726 | cg22622057 | 1  | 0.0147145  | 0.680152194 |
| -0.1251841 | cg00258136 | 8  | 0.00392583 | 0.509291606 |
| -0.2275109 | cg06194070 | 9  | 0.04650854 | 0.552104866 |
| -0.1879673 | cg25599567 | 19 | 0.01271427 | 0.4437519   |
| -0.1301176 | cg26905281 | 8  | 0.01194738 | 0.447653861 |
| -0.1399548 | cg19112804 | 12 | 0.03441277 | 0.722820688 |
| -0.1645102 | cg00210271 | 12 | 0.00416923 | 0.805541964 |
| -0.1243524 | cg18826598 | 7  | 0.00126274 | 0.21119916  |
| -0.1154152 | cg22202381 | 13 | 0.0295908  | 0.722852851 |
| -0.1240269 | cg06990460 | 11 | 0.00382477 | 0.350823475 |
| -0.1433604 | cg27134139 | 10 | 0.000482   | 0.362519548 |
| -0.1273111 | cg26946235 | 10 | 0.02483286 | 0.696561699 |
| -0.117715  | cg23408990 | 2  | 0.0123661  | 0.707983028 |
| -0.1542011 | cg00998372 | 2  | 0.04140644 | 0.423931701 |

|            |            |    |            |             |
|------------|------------|----|------------|-------------|
| -0.148936  | cg04398893 | 6  | 0.01758092 | 0.812893143 |
| -0.1147513 | cg21159068 | 1  | 0.04308376 | 0.810264344 |
| -0.1058442 | cg16782117 | 17 | 0.00217209 | 0.277635487 |
| -0.2637431 | cg02116255 | 9  | 0.01309854 | 0.68596391  |
| -0.1155106 | cg01955153 | 16 | 0.02029305 | 0.63811948  |
| -0.1057725 | cg19987129 | 6  | 0.04744205 | 0.718858052 |
| -0.1162145 | cg01204844 | 22 | 0.01240747 | 0.815984278 |
| -0.120701  | cg16297011 | 4  | 0.00416432 | 0.779195351 |
| -0.1569688 | cg15930777 | 6  | 0.0009936  | 0.77879574  |
| -0.1034848 | cg23108931 | 8  | 0.00386085 | 0.354754697 |
| -0.1100556 | cg01905090 | 1  | 0.00315259 | 0.816169988 |
| -0.1570119 | cg19506433 | 5  | 0.02070012 | 0.620207443 |
| -0.1477158 | cg02819992 | 7  | 0.02986351 | 0.854229341 |
| -0.178973  | cg20824200 | 2  | 0.01084747 | 0.551844068 |
| -0.1716314 | cg16487653 | 16 | 0.04435924 | 0.43379749  |
| -0.1190372 | cg15579822 | 6  | 0.03399496 | 0.734309783 |
| -0.1000164 | cg04214938 | 2  | 0.01964449 | 0.583844413 |
| -0.1222969 | cg18105361 | 5  | 0.00830623 | 0.636283431 |
| -0.2573494 | cg27225686 | 15 | 0.01769917 | 0.37682594  |
| -0.1403612 | cg26131026 | 17 | 0.00716572 | 0.505957642 |
| -0.1274675 | cg00387524 | 10 | 0.02698381 | 0.321028861 |
| -0.1487031 | cg01279413 | 20 | 0.0227235  | 0.451235597 |
| -0.1205356 | cg05373655 | 1  | 0.02079017 | 0.6522971   |
| -0.149362  | cg11361344 | 2  | 0.00154654 | 0.675827493 |
| -0.1129722 | cg16408820 | 8  | 0.03072261 | 0.830163173 |
| -0.1055512 | cg10717610 | 2  | 0.0438932  | 0.611160841 |
| -0.2525606 | cg24186104 | 5  | 0.04457624 | 0.856312942 |
| -0.2180697 | cg24085232 | 5  | 0.00525189 | 0.649903809 |
| -0.2071187 | cg25509467 | 20 | 0.00183708 | 0.372271543 |
| -0.206274  | cg03052004 | 6  | 0.03086871 | 0.863745158 |
| -0.1734987 | cg03580065 | 10 | 0.03587163 | 0.616576487 |
| -0.1236291 | cg21398275 | 6  | 0.02970335 | 0.399082338 |
| -0.1163639 | cg06298740 | 1  | 0.04923818 | 0.889905158 |
| -0.1118676 | cg12224508 | 2  | 0.02309477 | 0.507820585 |
| -0.1232044 | cg24275855 | 17 | 0.0015888  | 0.765183458 |
| -0.1084512 | cg15529532 | 10 | 0.01687986 | 0.746241473 |
| -0.1468442 | cg00497735 | 16 | 0.02410687 | 0.550906222 |
| -0.1550373 | cg21932416 | 2  | 0.00241175 | 0.816065911 |
| -0.1011531 | cg17722435 | 7  | 0.02485458 | 0.758459243 |
| -0.1514875 | cg13077865 | 8  | 0.01098698 | 0.83621224  |
| -0.1240099 | cg19106478 | 17 | 0.01561064 | 0.43653519  |
| -0.1118884 | cg11895596 | 3  | 0.02293515 | 0.76174639  |
| -0.1247518 | cg02322889 | 4  | 0.01390482 | 0.707888887 |
| -0.1995665 | cg26352652 | 12 | 0.04040244 | 0.524914327 |
| -0.164301  | cg04640920 | 15 | 0.01911077 | 0.827662784 |
| -0.1322423 | cg05005073 | 1  | 0.02913625 | 0.801685104 |

|            |            |    |            |             |
|------------|------------|----|------------|-------------|
| -0.1122249 | cg23244226 | 2  | 0.02347174 | 0.650553531 |
| -0.152809  | cg20607293 | 1  | 0.03217243 | 0.380420259 |
| -0.115119  | cg06155620 | 1  | 0.00319287 | 0.617972525 |
| -0.1142659 | cg04452203 | 4  | 0.03200895 | 0.278414743 |
| -0.1017296 | cg07240834 | 4  | 0.00144184 | 0.278328772 |
| -0.1020804 | cg22354724 | 19 | 0.00890178 | 0.480314085 |
| -0.1473534 | cg10541466 | 1  | 0.04970141 | 0.52197843  |
| -0.1538843 | cg08428292 | 16 | 0.00035687 | 0.826941246 |
| -0.1205844 | cg27482619 | 10 | 0.02044924 | 0.803941131 |
| -0.1106695 | cg12832204 | 7  | 0.02290649 | 0.651391151 |
| -0.1069295 | cg06637330 | 5  | 0.01213112 | 0.483347809 |
| -0.1560694 | cg22256944 | 19 | 0.02120774 | 0.334051405 |
| -0.1260276 | cg03705366 | 5  | 0.03110014 | 0.631329722 |
| -0.1146643 | cg14279307 | 1  | 0.01130535 | 0.580104555 |
| -0.3409972 | cg26192309 | 1  | 0.00515935 | 0.766366823 |
| -0.2408846 | cg09488090 | 16 | 0.03760114 | 0.808832705 |
| -0.195751  | cg18817955 | 14 | 0.02420814 | 0.760809158 |
| -0.1953231 | cg17679743 | 17 | 0.02038752 | 0.805637304 |
| -0.1897198 | cg06723337 | 16 | 0.00454463 | 0.581474387 |
| -0.1849576 | cg00655552 | 4  | 0.02979371 | 0.775417343 |
| -0.1800894 | cg26579550 | 15 | 0.01754877 | 0.829326257 |
| -0.1764255 | cg13688783 | 9  | 0.00459267 | 0.525587455 |
| -0.1449636 | cg00469541 | 4  | 0.04556772 | 0.795798766 |
| -0.136785  | cg27532955 | 12 | 0.02512596 | 0.796908408 |
| -0.1365794 | cg07537739 | 18 | 0.00884438 | 0.333944335 |
| -0.1339348 | cg21617694 | 6  | 0.01661362 | 0.498217593 |
| -0.1330629 | cg14534848 | 9  | 0.00024258 | 0.253508137 |
| -0.132468  | cg13851508 | 2  | 0.04844156 | 0.782139906 |
| -0.1310871 | cg01987702 | 2  | 0.00366687 | 0.824394097 |
| -0.129472  | cg09319020 | 17 | 0.00354059 | 0.781165314 |
| -0.129267  | cg22588983 | 5  | 0.04494194 | 0.732091724 |
| -0.1263928 | cg16700364 | 2  | 0.01520459 | 0.518047483 |
| -0.1245062 | cg00332937 | 5  | 0.00213053 | 0.766002732 |
| -0.1137105 | cg21200085 | 1  | 0.01694398 | 0.399868524 |
| -0.1090606 | cg25738326 | 15 | 0.0264559  | 0.339963337 |
| -0.1062778 | cg26986989 | 5  | 0.00435519 | 0.679733812 |
| -0.1611236 | cg02599498 | 7  | 0.01534992 | 0.395374245 |
| -0.1339909 | cg05792169 | 15 | 0.00575542 | 0.463266047 |
| -0.1323099 | cg09524946 | 13 | 0.00827513 | 0.295914825 |
| -0.224001  | cg21197796 | 9  | 0.03217327 | 0.592734774 |
| -0.2259575 | cg04762129 | 6  | 0.03197183 | 0.485071086 |
| -0.1984275 | cg16334869 | 7  | 3.77E-05   | 0.290430973 |
| -0.1578278 | cg24039081 | 3  | 0.00049471 | 0.219719339 |
| -0.1654784 | cg13084372 | 8  | 0.0342302  | 0.496392289 |
| -0.1979774 | cg07144720 | 3  | 0.03018672 | 0.463369238 |
| -0.1564044 | cg05220092 | 10 | 0.00042068 | 0.420847959 |



|            |            |    |            |             |
|------------|------------|----|------------|-------------|
| -0.1732862 | cg26094232 | 11 | 0.00085514 | 0.281515985 |
| -0.1671328 | cg08619102 | 4  | 0.01154139 | 0.530990734 |
| -0.1615228 | cg25726684 | 1  | 0.03504098 | 0.669222834 |
| -0.1569119 | cg02255484 | 6  | 0.01580103 | 0.282574751 |
| -0.1235757 | cg07013698 | 17 | 0.01112045 | 0.309856395 |
| -0.1012022 | cg01966891 | 15 | 0.00899731 | 0.425917983 |
| -0.2101868 | cg18655633 | 19 | 0.02046641 | 0.733757564 |
| -0.1227535 | cg14106710 | 11 | 0.04940661 | 0.394034494 |
| -0.1149594 | cg02738156 | 2  | 0.02154134 | 0.750055074 |
| -0.1084814 | cg15627871 | 3  | 0.00170365 | 0.740216496 |
| -0.1372639 | cg12731838 | 11 | 0.01447123 | 0.335045991 |
| -0.1382297 | cg24202916 | 20 | 0.00138801 | 0.586769334 |
| -0.1907402 | cg25750209 | 2  | 0.00343799 | 0.802989589 |
| -0.1127806 | cg26606789 | 21 | 0.00023073 | 0.27585787  |
| -0.1309714 | cg08079908 | 2  | 0.02324326 | 0.756194833 |
| -0.175857  | cg02721394 | 3  | 0.00356071 | 0.376697404 |
| -0.1197748 | cg05972216 | 4  | 0.02852125 | 0.444767957 |
| -0.1522265 | cg26996569 | 12 | 0.01733389 | 0.803918354 |
| -0.1980456 | cg06469726 | 2  | 0.01454329 | 0.6392275   |
| -0.1757381 | cg04380269 | 2  | 0.02678133 | 0.657342748 |
| -0.1688053 | cg02705918 | 12 | 0.02509027 | 0.427117623 |
| -0.1289329 | cg06837325 | 5  | 0.00062292 | 0.840722743 |
| -0.1363307 | cg13617812 | 15 | 0.02506193 | 0.545256246 |
| -0.1276729 | cg04149776 | 22 | 0.01617641 | 0.727298324 |
| -0.1085402 | cg01116161 | 5  | 0.0385962  | 0.90198197  |
| -0.1346058 | cg23153661 | 2  | 0.01874384 | 0.564615905 |
| -0.1823197 | cg12980795 | 5  | 0.01072312 | 0.580166923 |
| -0.1862429 | cg14420953 | 6  | 0.03753829 | 0.604842463 |
| -0.1642577 | cg22006640 | 4  | 6.98E-05   | 0.324630639 |
| -0.1225167 | cg18159802 | 11 | 0.01279835 | 0.463192426 |
| -0.1132207 | cg13401658 | 2  | 0.04203352 | 0.805706978 |
| -0.1261717 | cg11331078 | 10 | 0.04512485 | 0.90659669  |
| -0.1482614 | cg21649089 | 17 | 0.00513526 | 0.42381071  |
| -0.106931  | cg10553890 | 11 | 0.0062702  | 0.624402587 |
| -0.1673108 | cg17473898 | 19 | 0.00568968 | 0.659700102 |
| -0.1337029 | cg08166729 | 7  | 0.01296043 | 0.655450796 |
| -0.1381684 | cg01166876 | 2  | 0.01101163 | 0.72110768  |
| -0.1360569 | cg04134096 | 3  | 0.00399979 | 0.680076216 |
| -0.1197522 | cg11943058 | 21 | 0.00076333 | 0.308612228 |
| -0.1889981 | cg25161029 | 11 | 0.0436957  | 0.449036463 |
| -0.1726769 | cg26156321 | 1  | 0.00016571 | 0.28716404  |
| -0.1360908 | cg20428720 | 5  | 0.04169807 | 0.636225724 |
| -0.1501448 | cg09318283 | 8  | 0.02657191 | 0.790369003 |
| -0.1334545 | cg20473420 | 12 | 0.01932751 | 0.551763282 |
| -0.1208974 | cg13830300 | 17 | 0.04630253 | 0.656293204 |
| -0.1794247 | cg01612366 | 4  | 0.00193953 | 0.276216862 |

|            |                |    |            |             |
|------------|----------------|----|------------|-------------|
| -0.1805327 | cg00792107     | 12 | 0.00712382 | 0.505684319 |
| -0.1438226 | cg24881973     | 4  | 0.02604935 | 0.347202348 |
| -0.1061764 | cg12016405     | 6  | 0.01017837 | 0.784487398 |
| -0.1532412 | cg22082780     | 1  | 0.0027624  | 0.918278005 |
| -0.1028687 | cg17942618     | 1  | 0.00066893 | 0.313188679 |
| -0.1894269 | cg11119694     | 12 | 0.00213103 | 0.393085693 |
| -0.143983  | cg12131828     | 17 | 0.00012779 | 0.267875238 |
| -0.1145422 | cg18475969     | 3  | 0.00985946 | 0.331287917 |
| -0.1413743 | cg11028622     | 3  | 0.02041879 | 0.711726035 |
| -0.1502948 | cg08256175     | 12 | 0.01430355 | 0.833114133 |
| -0.1460889 | cg14698448     | 5  | 0.0128357  | 0.698125677 |
| -0.1378246 | cg10312186     | 6  | 0.01077575 | 0.833509466 |
| -0.1130871 | cg11581865     | 11 | 0.00656947 | 0.583813913 |
| -0.1039897 | cg09501717     | 2  | 0.01569579 | 0.790894758 |
| -0.1001684 | cg03862787     | 4  | 0.03855422 | 0.641284699 |
| -0.1349895 | cg12445832     | 1  | 0.02552507 | 0.575906189 |
| -0.137874  | cg26201596     | 10 | 0.01200998 | 0.690986081 |
| -0.1478135 | cg19383974     | 1  | 0.03556645 | 0.611340586 |
| -0.1326642 | cg14697657     | 5  | 0.00183661 | 0.247845827 |
| -0.1566451 | cg14503489     | 10 | 0.00922585 | 0.6033734   |
| -0.2465647 | cg05710982     | 4  | 0.01654602 | 0.238994917 |
| -0.2019703 | cg23686831     | 15 | 0.00197246 | 0.827347772 |
| -0.3037263 | cg05586863     | 16 | 0.01224875 | 0.747315898 |
| -0.1557319 | cg01829632     | 5  | 0.01910075 | 0.621529944 |
| -0.1289361 | cg08436738     | 2  | 0.02825207 | 0.717228406 |
| -0.1163495 | cg07735220     | 2  | 0.00214085 | 0.347619672 |
| -0.1146238 | cg06320150     | 22 | 0.04802754 | 0.718672955 |
| -0.1375678 | cg08832234     | 8  | 0.00023669 | 0.63192231  |
| -0.1109189 | cg04689582     | 10 | 0.0420775  | 0.479966188 |
| -0.1084989 | cg08732659     | 16 | 0.00158387 | 0.684301183 |
| -0.1444703 | cg11732301     | 1  | 0.03592202 | 0.752454857 |
| -0.2311316 | cg07316846     | 2  | 0.01028003 | 0.699714445 |
| -0.1355378 | cg16759813     | 2  | 0.00571896 | 0.513786037 |
| -0.1365179 | cg16906187     | 13 | 0.00061242 | 0.701940972 |
| -0.1561168 | cg11134052     | 14 | 0.01520805 | 0.432838501 |
| -0.2266511 | cg09880331     | 5  | 0.00203014 | 0.814480582 |
| -0.1509984 | cg17791977     | 5  | 0.02601562 | 0.440326889 |
| -0.1421669 | ch.3.82259654F | 3  | 0.0002921  | 0.240657579 |
| -0.1358189 | cg13711966     | 2  | 0.01822533 | 0.545635246 |
| -0.123743  | cg02443306     | 11 | 0.02258267 | 0.383450925 |
| -0.1226178 | cg12988117     | 7  | 0.00141139 | 0.299757608 |
| -0.1238607 | cg02484634     | 7  | 0.01106531 | 0.880018028 |
| -0.1057859 | cg14397231     | 4  | 0.02832424 | 0.395418617 |
| -0.2924639 | cg05271255     | 17 | 0.00411751 | 0.274651714 |
| -0.2767893 | cg13399203     | 10 | 0.0361137  | 0.80983002  |
| -0.2039458 | cg07969684     | 2  | 0.00126675 | 0.640389668 |

|            |                 |    |            |             |
|------------|-----------------|----|------------|-------------|
| -0.1882914 | cg22764700      | 17 | 0.01671643 | 0.459567634 |
| -0.1722129 | cg11019430      | 10 | 0.01239427 | 0.750540048 |
| -0.1030275 | cg24057775      | 1  | 0.02472817 | 0.677226525 |
| -0.1744757 | cg24335070      | 2  | 0.03071161 | 0.540729752 |
| -0.1310867 | cg15850739      | 15 | 0.00648924 | 0.487858234 |
| -0.1293333 | cg06195193      | 13 | 0.00017143 | 0.281884621 |
| -0.1546363 | cg16943505      | 11 | 0.00120246 | 0.896879749 |
| -0.1742218 | cg25720825      | 1  | 0.04554843 | 0.612944037 |
| -0.1645363 | cg09478002      | 2  | 0.00118499 | 0.293880109 |
| -0.1147906 | cg26833936      | 1  | 0.007168   | 0.84991687  |
| -0.1927091 | cg00516092      | 20 | 0.01279454 | 0.328649527 |
| -0.1093693 | cg20435594      | 11 | 0.01118866 | 0.543064503 |
| -0.1134353 | cg05310486      | 15 | 0.00215303 | 0.791136747 |
| -0.2647796 | cg01610123      | 5  | 0.01867326 | 0.718054411 |
| -0.2653927 | cg07735586      | 3  | 0.0491997  | 0.728958087 |
| -0.1711708 | cg04244152      | 10 | 0.02572782 | 0.762493975 |
| -0.1265713 | cg08894532      | 19 | 0.02337882 | 0.567078437 |
| -0.1063699 | cg05360774      | 2  | 0.03314462 | 0.648531457 |
| -0.2082297 | cg22877366      | 1  | 0.00453227 | 0.487573213 |
| -0.1841386 | cg07833951      | 1  | 0.03310994 | 0.582128893 |
| -0.1457786 | cg18129996      | 7  | 0.01017962 | 0.88913304  |
| -0.1336569 | ch.10.80061816F | 10 | 0.00755574 | 0.334013941 |
| -0.1449361 | cg20072118      | 12 | 0.02931966 | 0.794676441 |
| -0.1039849 | cg15867307      | 2  | 0.03655792 | 0.489452072 |
| -0.1017309 | cg06822193      | 15 | 0.02867065 | 0.436684037 |
| -0.1521146 | cg21046148      | 5  | 0.00481442 | 0.70525944  |
| -0.1602166 | cg23261107      | 7  | 0.01428187 | 0.818437107 |
| -0.2650056 | cg07371521      | 5  | 0.00586884 | 0.696970183 |
| -0.1735492 | cg11905324      | 8  | 0.03731269 | 0.847926351 |
| -0.1078224 | cg18672998      | 17 | 0.00581964 | 0.464012307 |
| -0.1695741 | cg09364426      | 1  | 0.02418091 | 0.356095456 |
| -0.1063985 | cg19807286      | 5  | 0.017097   | 0.816707354 |
| -0.1055237 | cg14223856      | 9  | 0.02190388 | 0.663669065 |
| -0.1035978 | cg17224892      | 17 | 0.00985764 | 0.440970107 |
| -0.1065271 | cg10308673      | 11 | 0.02144788 | 0.471400887 |
| -0.2098095 | cg21567649      | 2  | 0.00673448 | 0.430011504 |
| -0.1723747 | cg12999267      | 12 | 0.01451289 | 0.325498474 |
| -0.1782276 | cg21237959      | 14 | 0.00882619 | 0.5707046   |
| -0.124373  | cg02273797      | 1  | 0.01679171 | 0.489619664 |
| -0.1376546 | cg04804321      | 8  | 0.01021957 | 0.798085084 |
| -0.1021564 | cg08529744      | 1  | 0.02173728 | 0.586697359 |
| -0.1842014 | cg01955492      | 6  | 0.01291544 | 0.411584054 |
| -0.1696013 | cg10606620      | 4  | 0.00876901 | 0.821085331 |
| -0.1360496 | cg24454932      | 6  | 0.00074287 | 0.649479189 |
| -0.1095185 | cg26189303      | 5  | 0.04552502 | 0.653223672 |
| -0.1334183 | cg08324862      | 12 | 0.00614202 | 0.683360185 |

|            |            |    |            |             |
|------------|------------|----|------------|-------------|
| -0.116287  | cg14747813 | 8  | 0.00338219 | 0.697214447 |
| -0.2007638 | cg02452500 | 11 | 0.00040155 | 0.281412205 |
| -0.1987738 | cg14552947 | 10 | 0.01094787 | 0.254291084 |
| -0.1660304 | cg06484100 | 17 | 0.01987191 | 0.44369197  |
| -0.1687253 | cg21971799 | 11 | 0.01169462 | 0.702312922 |
| -0.1486635 | cg06655665 | 2  | 0.01358289 | 0.467205322 |
| -0.2240836 | cg19916740 | 22 | 0.023054   | 0.621028143 |
| -0.1000994 | cg16797421 | 6  | 0.00439956 | 0.230776046 |
| -0.1447565 | cg01439876 | 1  | 0.02633804 | 0.674554846 |
| -0.1698189 | cg25476130 | 8  | 0.03000192 | 0.593233799 |
| -0.1196243 | cg13017983 | 8  | 0.00191593 | 0.277498449 |
| -0.1181103 | cg18766033 | 5  | 0.04471185 | 0.871664944 |
| -0.1162748 | cg01423389 | 3  | 0.00249041 | 0.67110149  |
| -0.1274357 | cg03254336 | 10 | 0.01414796 | 0.308691319 |
| -0.1484275 | cg24428600 | 1  | 0.00392871 | 0.665466253 |
| -0.2000949 | cg11422851 | 8  | 0.03214498 | 0.822708808 |
| -0.3063326 | cg21707089 | 8  | 0.00977973 | 0.436529122 |
| -0.1371548 | cg09468832 | 21 | 0.04658025 | 0.458971132 |
| -0.1200946 | cg09372486 | 19 | 0.03706748 | 0.553517089 |
| -0.1227798 | cg21653474 | 6  | 0.0173684  | 0.486588499 |
| -0.1903367 | cg09499095 | 2  | 0.01140539 | 0.344972723 |
| -0.2504734 | cg11959697 | 1  | 0.00981004 | 0.494459653 |
| -0.1677401 | cg04722349 | 2  | 0.04099663 | 0.52689704  |
| -0.1336955 | cg26545519 | 2  | 0.01410653 | 0.662768574 |
| -0.1243863 | cg26994377 | 4  | 0.00379262 | 0.28112655  |
| -0.1206259 | cg27295434 | 1  | 0.01392652 | 0.852844956 |
| -0.1393292 | cg25961816 | 6  | 0.03336697 | 0.62844024  |
| -0.121087  | cg01114033 | 11 | 0.0027296  | 0.366079485 |
| -0.1421153 | cg17485021 | 4  | 0.00055533 | 0.282601066 |
| -0.1237001 | cg20263901 | 6  | 0.00030927 | 0.379016926 |
| -0.2251566 | cg07121693 | 10 | 0.00371753 | 0.463658365 |
| -0.1464188 | cg12082015 | 2  | 0.02127053 | 0.59885254  |
| -0.194045  | cg18761422 | 15 | 0.00065706 | 0.377304734 |
| -0.1769772 | cg01934638 | 1  | 0.00717881 | 0.714780569 |
| -0.1539619 | cg18496440 | 5  | 0.00029099 | 0.449282333 |
| -0.1380692 | cg03273315 | 8  | 0.00878809 | 0.445053495 |
| -0.1206943 | cg26267430 | 15 | 0.00400838 | 0.594256264 |
| -0.1015931 | cg03623982 | 6  | 0.00073663 | 0.263922649 |
| -0.1664187 | cg03045014 | 17 | 0.04520435 | 0.772348644 |
| -0.1353613 | cg00296348 | 10 | 0.00424088 | 0.555109664 |
| -0.1170331 | cg08672695 | 6  | 0.0445086  | 0.615449676 |
| -0.1096706 | cg05180182 | 10 | 0.00801223 | 0.753350073 |
| -0.1020348 | cg00468228 | 8  | 0.00608778 | 0.671884449 |
| -0.1155516 | cg07726287 | 16 | 0.00959054 | 0.57784933  |
| -0.1571288 | cg26686150 | 12 | 0.00370045 | 0.396200175 |
| -0.15708   | cg23697406 | 7  | 0.03446502 | 0.806975824 |

|            |            |    |            |             |
|------------|------------|----|------------|-------------|
| -0.1538498 | cg12082516 | 1  | 0.03468387 | 0.643121379 |
| -0.1306482 | cg08657705 | 5  | 0.04489123 | 0.54243648  |
| -0.1254596 | cg01246390 | 12 | 4.04E-05   | 0.859666399 |
| -0.1125367 | cg02360002 | 6  | 0.01353127 | 0.814275599 |
| -0.1079316 | cg25898192 | 15 | 0.01261588 | 0.231617464 |
| -0.2071481 | cg23730408 | 18 | 0.02863803 | 0.778748365 |
| -0.1383692 | cg02867776 | 5  | 0.0290501  | 0.424333023 |
| -0.1448384 | cg11007120 | 13 | 0.00441943 | 0.438580898 |
| -0.1085523 | cg02980621 | 8  | 0.0019497  | 0.322050465 |
| -0.1462629 | cg16651768 | 1  | 0.03008269 | 0.575556505 |
| -0.1626014 | cg24822529 | 5  | 0.03323802 | 0.335883799 |
| -0.139533  | cg03421236 | 16 | 0.02728831 | 0.524861657 |
| -0.1233394 | cg23521140 | 2  | 0.00274219 | 0.381305056 |
| -0.1278042 | cg27259235 | 6  | 0.0203345  | 0.481627864 |
| -0.1692074 | cg04840702 | 4  | 0.00461913 | 0.79576857  |
| -0.1281312 | cg22378095 | 6  | 0.02665584 | 0.618702626 |
| -0.2482143 | cg12434362 | 5  | 0.00463069 | 0.778466713 |
| -0.1597487 | cg05710540 | 4  | 0.00087579 | 0.656145222 |
| -0.1010903 | cg16211174 | 7  | 0.01190514 | 0.623920818 |
| -0.106782  | cg15083851 | 7  | 0.03738066 | 0.539590892 |
| -0.1710172 | cg22590099 | 17 | 0.00521071 | 0.458575971 |
| -0.1502313 | cg15265102 | 17 | 0.0244247  | 0.634615557 |
| -0.1128442 | cg21228270 | 9  | 0.01542532 | 0.704780091 |
| -0.1012022 | cg10416784 | 2  | 0.00544526 | 0.480816638 |
| -0.2103685 | cg14897569 | 15 | 0.01515895 | 0.624247382 |
| -0.1958175 | cg04225368 | 2  | 0.01230854 | 0.467772797 |
| -0.1089846 | cg01899624 | 5  | 0.01189376 | 0.849138077 |
| -0.1160839 | cg03190769 | 2  | 0.02094394 | 0.335883491 |
| -0.1717653 | cg01018477 | 5  | 0.03895809 | 0.651636357 |
| -0.270203  | cg13300246 | 7  | 0.00313066 | 0.363715863 |
| -0.1196265 | cg13612936 | 2  | 0.00290189 | 0.344789534 |
| -0.1031833 | cg01761966 | 6  | 0.03583624 | 0.85292628  |
| -0.1213054 | cg00296903 | 9  | 0.04990654 | 0.541645151 |
| -0.1249818 | cg12763430 | 10 | 0.01001718 | 0.396027903 |
| -0.1671137 | cg02326806 | 15 | 0.0003379  | 0.87943732  |
| -0.148386  | cg00688840 | 14 | 0.01561215 | 0.36671154  |
| -0.1258006 | cg20933946 | 15 | 0.00261433 | 0.847576248 |
| -0.2333262 | cg20170223 | 20 | 0.0094936  | 0.586847088 |
| -0.1730977 | cg12931554 | 8  | 0.04287513 | 0.532620796 |
| -0.1679637 | cg08692111 | 19 | 0.03121105 | 0.406938232 |
| -0.1642059 | cg25024214 | 1  | 0.00108726 | 0.74631592  |
| -0.1091565 | cg21852792 | 2  | 0.04893011 | 0.695041084 |
| -0.2743045 | cg07770402 | 18 | 0.03014892 | 0.759725118 |
| -0.2452785 | cg04667681 | 15 | 0.03815778 | 0.89679683  |
| -0.174277  | cg10357314 | 11 | 0.01967828 | 0.853512144 |
| -0.1555879 | cg07368069 | 12 | 0.00065953 | 0.294961989 |

|            |            |    |            |             |
|------------|------------|----|------------|-------------|
| -0.1151049 | cg19152255 | 20 | 0.04184069 | 0.463461872 |
| -0.1162786 | cg18530299 | 8  | 0.01253862 | 0.400179712 |
| -0.1830719 | cg26891211 | 16 | 0.02570482 | 0.6950747   |
| -0.1474121 | cg03213374 | 12 | 0.00815313 | 0.338192259 |
| -0.1450091 | cg07874386 | 5  | 0.01099259 | 0.698902907 |
| -0.1407685 | cg02614024 | 15 | 0.00245135 | 0.615889366 |
| -0.1336419 | cg25653641 | 6  | 0.0130544  | 0.611362394 |
| -0.1406858 | cg20991420 | 2  | 0.02646752 | 0.772373999 |
| -0.1169817 | cg08610901 | 7  | 0.00521791 | 0.688671806 |
| -0.1496277 | cg21393124 | 17 | 0.03187001 | 0.647519444 |
| -0.1450496 | cg12244275 | 2  | 0.03919554 | 0.717129135 |
| -0.1239983 | cg21957306 | 2  | 0.04107044 | 0.668607089 |
| -0.1123708 | cg03439301 | 7  | 0.01649394 | 0.782087192 |
| -0.1253329 | cg15735417 | 7  | 0.0160284  | 0.685241024 |
| -0.1236581 | cg21831467 | 13 | 0.01186278 | 0.760780088 |
| -0.2509891 | cg09440866 | 12 | 0.00355012 | 0.364743705 |
| -0.1806739 | cg24029426 | 4  | 0.00432194 | 0.375039617 |
| -0.1081633 | cg24935598 | 3  | 0.03980284 | 0.827541375 |
| -0.1078866 | cg14507100 | 2  | 0.02927853 | 0.745090061 |
| -0.11193   | cg04676482 | 4  | 0.00028481 | 0.465067302 |
| -0.1173422 | cg07925415 | 7  | 0.01161015 | 0.345873011 |
| -0.1365495 | cg01311151 | 12 | 0.00901607 | 0.604986675 |
| -0.1487994 | cg23756173 | 17 | 0.00846649 | 0.435797389 |
| -0.1175388 | cg02136690 | 13 | 0.0006858  | 0.34707714  |
| -0.1286267 | cg06711306 | 5  | 0.04376767 | 0.456371458 |
| -0.1064147 | cg03020635 | 14 | 0.00158387 | 0.816808583 |
| -0.1382843 | cg00951599 | 5  | 0.00541486 | 0.672501944 |
| -0.2348381 | cg17593342 | 6  | 0.00592098 | 0.675253064 |
| -0.1982657 | cg05775862 | 10 | 0.00308038 | 0.243213198 |
| -0.1976858 | cg01068621 | 1  | 0.01013414 | 0.863596085 |
| -0.1906615 | cg04544858 | 5  | 0.01165559 | 0.435074051 |
| -0.1737579 | cg21807262 | 14 | 0.00184547 | 0.714328572 |
| -0.170569  | cg10334416 | 17 | 0.00578879 | 0.811253441 |
| -0.1595039 | cg19683821 | 10 | 0.04566991 | 0.776060857 |
| -0.1585868 | cg09678539 | 2  | 0.02694883 | 0.593631959 |
| -0.1584686 | cg18229196 | 10 | 0.02225075 | 0.746726096 |
| -0.1511319 | cg11633770 | 8  | 0.00321453 | 0.353006141 |
| -0.1418555 | cg05840412 | 13 | 0.00128769 | 0.276034674 |
| -0.1331557 | cg05494668 | 11 | 0.01689518 | 0.644538987 |
| -0.1286338 | cg21175246 | 14 | 0.00169575 | 0.31177053  |
| -0.1272675 | cg20788482 | 22 | 0.03093678 | 0.62922942  |
| -0.119847  | cg06065019 | 2  | 0.0010134  | 0.319413426 |
| -0.1179422 | cg20584732 | 15 | 0.00938725 | 0.345833524 |
| -0.1166142 | cg13843843 | 17 | 0.00864767 | 0.535795323 |
| -0.1117147 | cg06042148 | 8  | 0.04099621 | 0.642123908 |
| -0.104282  | cg19610529 | 14 | 0.00222902 | 0.727530885 |

|            |            |    |            |             |
|------------|------------|----|------------|-------------|
| -0.1011401 | cg18198461 | 8  | 0.00029575 | 0.399394345 |
| -0.3351741 | cg10923855 | 12 | 0.00230751 | 0.635776945 |
| -0.1007093 | cg19774973 | 8  | 0.02810029 | 0.737787863 |
| -0.2558529 | cg13305406 | 11 | 0.03780274 | 0.556990495 |
| -0.1282538 | cg24561305 | 13 | 0.00239348 | 0.412504481 |
| -0.1181885 | cg15827092 | 14 | 0.00779096 | 0.69594369  |
| -0.1163143 | cg13716880 | 2  | 0.00570879 | 0.733641928 |
| -0.2367254 | cg08707476 | 1  | 0.0137359  | 0.725330141 |
| -0.1843189 | cg19092317 | 5  | 0.01529328 | 0.699483684 |
| -0.1777947 | cg16295461 | 4  | 0.01417062 | 0.591036327 |
| -0.1693614 | cg19807991 | 1  | 0.00784052 | 0.403550739 |
| -0.1556239 | cg06480353 | 7  | 0.01609821 | 0.383940115 |
| -0.155234  | cg17150809 | 6  | 0.00536554 | 0.821802396 |
| -0.1447328 | cg14250450 | 10 | 0.01789554 | 0.58344129  |
| -0.1407804 | cg14890730 | 10 | 0.00415626 | 0.371570481 |
| -0.1107631 | cg13251666 | 7  | 0.02972257 | 0.469990716 |
| -0.1102506 | cg09338148 | 16 | 0.00595297 | 0.302692744 |
| -0.1069956 | cg03155159 | 16 | 0.00128478 | 0.336982236 |
| -0.1018037 | cg06560169 | 5  | 0.00718817 | 0.46185908  |
| -0.1017145 | cg09417209 | 16 | 0.00505806 | 0.738246764 |
| -0.1016609 | cg12570032 | 11 | 0.02493901 | 0.687592592 |
| -0.1006106 | cg22909709 | 8  | 0.00915753 | 0.729966845 |
| -0.193645  | cg12586707 | 4  | 0.02269763 | 0.670244646 |
| -0.1233302 | cg06798115 | 3  | 0.02625767 | 0.553585849 |
| -0.1785191 | cg27336587 | 15 | 0.00138984 | 0.790831633 |
| -0.1692168 | cg02502233 | 6  | 0.00139778 | 0.301244017 |
| -0.1245335 | cg05210615 | 17 | 0.00061419 | 0.32780311  |
| -0.1040125 | cg09735822 | 12 | 0.00588996 | 0.527306088 |
| -0.1243889 | cg20470975 | 6  | 0.01911762 | 0.736002214 |
| -0.1675516 | cg17109725 | 1  | 0.01914043 | 0.454396919 |
| -0.1017458 | cg00277334 | 10 | 0.0159774  | 0.405399319 |
| -0.2096463 | cg15724945 | 1  | 0.04002243 | 0.866380849 |
| -0.1800262 | cg15708526 | 6  | 0.04575131 | 0.798124062 |
| -0.1541346 | cg27407390 | 15 | 0.04103986 | 0.843054279 |
| -0.1141656 | cg27024272 | 16 | 0.01870042 | 0.647567333 |
| -0.2018078 | cg15649384 | 2  | 0.03083166 | 0.72019232  |
| -0.111985  | cg26904260 | 11 | 0.03034423 | 0.444206205 |
| -0.1384347 | cg11886187 | 17 | 0.01241426 | 0.722374555 |
| -0.1701244 | cg04104789 | 15 | 0.0047697  | 0.659299157 |
| -0.1732629 | cg07353006 | 8  | 0.00989552 | 0.460656933 |
| -0.1682012 | cg12032650 | 7  | 0.03012963 | 0.572697087 |
| -0.102014  | cg19677281 | 14 | 0.00083981 | 0.348108623 |
| -0.1567677 | cg01298102 | 16 | 0.03374761 | 0.638012933 |
| -0.1353486 | cg09332091 | 19 | 0.00476815 | 0.592400843 |
| -0.1321169 | cg12950030 | 14 | 0.00142893 | 0.427041528 |
| -0.1215064 | cg25488749 | 21 | 0.02809966 | 0.684864308 |

|            |            |    |            |             |
|------------|------------|----|------------|-------------|
| -0.1034923 | cg08530838 | 5  | 0.02384035 | 0.701585005 |
| -0.1478872 | cg03076094 | 16 | 0.00257969 | 0.549839954 |
| -0.1146372 | cg04544946 | 8  | 0.00158521 | 0.617704243 |
| -0.1524803 | cg26967100 | 14 | 0.00028817 | 0.73638661  |
| -0.1054486 | cg11018892 | 6  | 0.00199071 | 0.770588302 |
| -0.1026548 | cg26391564 | 7  | 0.00178639 | 0.312619178 |
| -0.1010782 | cg18808466 | 13 | 0.0023106  | 0.835657391 |
| -0.1164068 | cg16031846 | 8  | 0.00223044 | 0.52367249  |
| -0.11592   | cg08859406 | 5  | 0.01532845 | 0.497797276 |
| -0.1122933 | cg03781727 | 7  | 0.01046928 | 0.726396972 |
| -0.2494647 | cg07080244 | 11 | 0.02500717 | 0.49565907  |
| -0.1708453 | cg09801824 | 10 | 0.01066149 | 0.781671524 |
| -0.1592389 | cg24095864 | 22 | 0.0036512  | 0.404332187 |
| -0.1279818 | cg13376120 | 2  | 0.00795364 | 0.368289044 |
| -0.1137256 | cg07786355 | 10 | 0.01735214 | 0.8079025   |
| -0.1535969 | cg09290175 | 22 | 0.04400956 | 0.913889327 |
| -0.116145  | cg19429051 | 5  | 0.0311161  | 0.662255173 |
| -0.1326982 | cg12011343 | 6  | 0.00649647 | 0.717143503 |
| -0.1080149 | cg12207248 | 3  | 0.02826424 | 0.570037217 |
| -0.1060112 | cg20992785 | 6  | 0.03662312 | 0.672850298 |
| -0.1031822 | cg08313539 | 6  | 0.01218149 | 0.414682099 |
| -0.1172614 | cg13819609 | 9  | 0.00321963 | 0.83992305  |
| -0.1897046 | cg12404462 | 2  | 0.0028302  | 0.804608266 |
| -0.1018796 | cg07271186 | 7  | 0.0047246  | 0.421753013 |
| -0.2676262 | cg10898182 | 5  | 0.00029105 | 0.756370797 |
| -0.1410387 | cg00248242 | 2  | 0.02693691 | 0.377828404 |
| -0.1396028 | cg20670946 | 12 | 0.01016431 | 0.496565046 |
| -0.1377817 | cg04373760 | 16 | 0.03432851 | 0.400616422 |
| -0.1315654 | cg24215812 | 10 | 0.03058215 | 0.541007077 |
| -0.1588948 | cg16846514 | 11 | 0.04803038 | 0.774049705 |
| -0.2010783 | cg07143815 | 8  | 0.00201469 | 0.345488956 |
| -0.2063366 | cg02291164 | 14 | 0.00638447 | 0.853903391 |
| -0.1883763 | cg06937927 | 8  | 0.00144872 | 0.618106343 |
| -0.1609905 | cg08639279 | 11 | 0.00673317 | 0.863516477 |
| -0.1597821 | cg19619817 | 10 | 0.0178254  | 0.81232559  |
| -0.1371144 | cg26088680 | 14 | 0.00256044 | 0.756502932 |
| -0.1369803 | cg22881265 | 3  | 0.02501062 | 0.482426109 |
| -0.125589  | cg03171003 | 2  | 0.00064762 | 0.340319402 |
| -0.1365217 | cg14893576 | 2  | 0.01474515 | 0.385071521 |
| -0.1150419 | cg11367260 | 10 | 0.02983805 | 0.638031008 |
| -0.1353687 | cg14327296 | 14 | 0.00538875 | 0.389977961 |
| -0.2034712 | cg00345744 | 7  | 0.04628343 | 0.495754969 |
| -0.178616  | cg09525295 | 7  | 0.0369831  | 0.660026693 |
| -0.2265905 | cg14560364 | 9  | 0.0267632  | 0.650214851 |
| -0.1479074 | cg00512484 | 18 | 0.01324991 | 0.634596792 |
| -0.1153956 | cg18096962 | 5  | 0.00232638 | 0.685837932 |



|            |            |    |            |             |
|------------|------------|----|------------|-------------|
| -0.1087827 | cg12319143 | 10 | 0.04847804 | 0.374776468 |
| -0.1151906 | cg21177821 | 14 | 0.04213508 | 0.710259342 |
| -0.1320674 | cg10791884 | 8  | 0.00172382 | 0.851337094 |
| -0.1341233 | cg14424963 | 9  | 0.01478977 | 0.768828543 |
| -0.1426542 | cg14298777 | 19 | 0.00535635 | 0.563432877 |
| -0.114474  | cg01524149 | 16 | 0.00042483 | 0.380721678 |
| -0.113022  | cg13993197 | 1  | 0.02122421 | 0.512282978 |
| -0.1761778 | cg00054639 | 2  | 0.00059019 | 0.309929157 |
| -0.1657539 | cg04659537 | 2  | 0.01959868 | 0.456906607 |
| -0.2102369 | cg15702677 | 2  | 0.00384626 | 0.492961011 |
| -0.1959374 | cg02045948 | 3  | 0.00545547 | 0.318819714 |
| -0.1170822 | cg20301074 | 14 | 0.0332211  | 0.932992504 |
| -0.1533864 | cg23089445 | 8  | 0.00155676 | 0.539991154 |
| -0.1513557 | cg08267250 | 10 | 0.00013571 | 0.272978458 |
| -0.1909076 | cg06914505 | 15 | 0.03434408 | 0.459151292 |
| -0.1334107 | cg17391194 | 11 | 0.00159786 | 0.818015388 |
| -0.1265136 | cg09145690 | 8  | 0.04435283 | 0.782193676 |
| -0.1026388 | cg01957897 | 15 | 0.00273929 | 0.601583079 |
| -0.1605905 | cg02954563 | 14 | 0.00744038 | 0.435386867 |
| -0.1492701 | cg00192026 | 4  | 0.00079924 | 0.8407835   |
| -0.1711221 | cg11810998 | 1  | 0.00624518 | 0.599389739 |
| -0.1055489 | cg10718614 | 1  | 0.00978051 | 0.771499553 |
| -0.1766459 | cg07161369 | 7  | 0.00425473 | 0.607964651 |
| -0.1362094 | cg24116380 | 5  | 0.00828548 | 0.781936424 |
| -0.1278844 | cg11012965 | 6  | 0.00582049 | 0.434218195 |
| -0.1873142 | cg27198040 | 12 | 0.03144013 | 0.753623279 |
| -0.1358516 | cg03097134 | 6  | 0.02412303 | 0.464721717 |
| -0.1580979 | cg07959469 | 15 | 0.00802907 | 0.749355044 |
| -0.1976049 | cg11763066 | 6  | 0.02060774 | 0.351354275 |
| -0.1190357 | cg15871797 | 14 | 0.01270123 | 0.609075989 |
| -0.1514185 | cg05199874 | 11 | 0.02242703 | 0.823052932 |
| -0.1486612 | cg15481493 | 11 | 0.03268335 | 0.831108336 |
| -0.1037926 | cg18275589 | 5  | 0.0217717  | 0.342015175 |
| -0.1033904 | cg20544372 | 7  | 0.01347545 | 0.443879321 |
| -0.161372  | cg23919830 | 21 | 0.03286679 | 0.60078644  |
| -0.1231182 | cg26124526 | 5  | 0.04667039 | 0.631000977 |
| -0.1058301 | cg17955599 | 22 | 0.00974374 | 0.656939779 |
| -0.2424557 | cg00745046 | 10 | 0.04202567 | 0.812279822 |
| -0.1420154 | cg07106394 | 14 | 0.00134052 | 0.503746893 |
| -0.1564339 | cg03848421 | 10 | 0.01051047 | 0.406821816 |
| -0.1505527 | cg12379383 | 15 | 7.61E-05   | 0.710963381 |
| -0.1476781 | cg07343174 | 18 | 0.00504331 | 0.736854514 |
| -0.1476541 | cg01889956 | 6  | 0.00201469 | 0.331726706 |
| -0.1115254 | cg23717725 | 18 | 0.01275254 | 0.724733022 |
| -0.1061775 | cg10238080 | 12 | 0.0234129  | 0.662574951 |
| -0.1300718 | cg07493197 | 17 | 0.02998091 | 0.819580973 |

|            |            |    |            |             |
|------------|------------|----|------------|-------------|
| -0.1722284 | cg09232555 | 8  | 0.00362461 | 0.80519447  |
| -0.1278315 | cg19743168 | 1  | 0.00555632 | 0.322301002 |
| -0.158352  | cg22658758 | 5  | 0.00908404 | 0.403563079 |
| -0.1078046 | cg11958234 | 1  | 0.00845028 | 0.845338258 |
| -0.1638025 | cg26382080 | 12 | 0.0024     | 0.730601934 |
| -0.1397642 | cg27488824 | 4  | 0.01580253 | 0.750153465 |
| -0.1370537 | cg22452837 | 6  | 0.01296851 | 0.306995749 |
| -0.1310211 | cg00556100 | 1  | 0.0375423  | 0.728161045 |
| -0.1246391 | cg02137956 | 7  | 0.02181173 | 0.639225845 |
| -0.1244827 | cg20741040 | 1  | 0.00652603 | 0.724507015 |
| -0.1003733 | cg01632562 | 6  | 0.04084099 | 0.776426143 |
| -0.1044848 | cg05468458 | 5  | 0.01111661 | 0.736007599 |
| -0.1352295 | cg00119778 | 6  | 0.01894379 | 0.239088254 |
| -0.1342249 | cg18633990 | 7  | 0.0309387  | 0.768403196 |
| -0.1252757 | cg10585371 | 1  | 0.00165735 | 0.257778998 |
| -0.1051685 | cg14357455 | 6  | 0.04922687 | 0.683677094 |
| -0.1037903 | cg26884658 | 18 | 0.02062162 | 0.434467913 |
| -0.1684241 | cg15835664 | 1  | 0.02093885 | 0.461187489 |
| -0.1314904 | cg18829827 | 5  | 0.00104853 | 0.701943947 |
| -0.2030055 | cg22976832 | 10 | 0.00013939 | 0.273618375 |
| -0.1494665 | cg23346544 | 8  | 0.04742478 | 0.67230227  |
| -0.101625  | cg02698668 | 19 | 0.00672683 | 0.300179092 |
| -0.1416792 | cg17888985 | 10 | 0.00613024 | 0.342513503 |
| -0.114502  | cg01768201 | 5  | 0.00948734 | 0.486548044 |
| -0.1767371 | cg04797957 | 17 | 0.00591221 | 0.277322267 |
| -0.2029094 | cg05762612 | 18 | 0.00620044 | 0.532589943 |
| -0.1035816 | cg14343713 | 11 | 0.01040661 | 0.569826591 |
| -0.1456497 | cg06728103 | 12 | 0.01010999 | 0.513906671 |
| -0.1239014 | cg09663343 | 11 | 0.0239552  | 0.753317106 |
| -0.1075914 | cg15852553 | 6  | 0.02007014 | 0.578809919 |
| -0.1010559 | cg16251016 | 19 | 0.01512127 | 0.565792592 |
| -0.2304445 | cg07029024 | 11 | 0.03087593 | 0.557416332 |
| -0.135653  | cg14118997 | 14 | 0.00198004 | 0.364525134 |
| -0.1540922 | cg13260148 | 3  | 0.03776056 | 0.552425895 |
| -0.1512446 | cg21132420 | 22 | 0.01296575 | 0.537759627 |
| -0.1080012 | cg14113958 | 9  | 0.03897826 | 0.764293936 |
| -0.1473923 | cg16899991 | 3  | 0.00313953 | 0.780871314 |
| -0.1810327 | cg13357922 | 10 | 0.01272382 | 0.680546457 |
| -0.1156775 | cg09508668 | 13 | 0.00102622 | 0.704121899 |
| -0.1333348 | cg08719642 | 9  | 0.0015281  | 0.476583884 |
| -0.1666318 | cg00571483 | 1  | 0.00116146 | 0.374442131 |
| -0.1529153 | cg11079129 | 5  | 0.01515958 | 0.426667869 |
| -0.1384551 | cg09063936 | 2  | 0.02440873 | 0.430681409 |
| -0.1290009 | cg25673591 | 17 | 0.01340123 | 0.552946486 |
| -0.1264913 | cg06357341 | 12 | 0.00078299 | 0.332065258 |
| -0.1067803 | cg18890112 | 1  | 0.01005515 | 0.560409434 |

|            |            |    |            |             |
|------------|------------|----|------------|-------------|
| -0.2884503 | cg19476334 | 12 | 0.00053711 | 0.784179753 |
| -0.1384287 | cg15006828 | 20 | 0.00063753 | 0.377601609 |
| -0.1316745 | cg03402926 | 11 | 0.00267898 | 0.570581929 |
| -0.1937228 | cg02637031 | 5  | 0.0053714  | 0.454265919 |
| -0.1842444 | cg14451730 | 3  | 0.00139535 | 0.406299079 |
| -0.17578   | cg05191919 | 5  | 0.03412512 | 0.35118754  |
| -0.1524241 | cg06551697 | 17 | 0.0119797  | 0.827794559 |
| -0.1419092 | cg23843705 | 1  | 0.02312567 | 0.749662252 |
| -0.1929998 | cg10828561 | 8  | 0.01073052 | 0.664577781 |
| -0.1340847 | cg19318537 | 11 | 0.00043188 | 0.382247238 |
| -0.1596164 | cg10739715 | 6  | 0.0251     | 0.517121515 |
| -0.1052143 | cg21636911 | 5  | 0.00177899 | 0.694738268 |
| -0.2038635 | cg09726198 | 3  | 0.0349486  | 0.461546333 |
| -0.1090296 | cg04844574 | 12 | 0.00511436 | 0.244195783 |
| -0.1975213 | cg26269286 | 14 | 0.00083773 | 0.365359511 |
| -0.1530725 | cg13929323 | 9  | 0.0081004  | 0.870137879 |
| -0.1461403 | cg13330005 | 7  | 0.01471195 | 0.592665351 |
| -0.1995747 | cg20591407 | 12 | 0.03347989 | 0.850475726 |
| -0.1414288 | cg27076113 | 6  | 0.00224998 | 0.302232173 |
| -0.1219352 | cg14704980 | 7  | 0.01819388 | 0.890730619 |
| -0.1151649 | cg20117256 | 15 | 0.02000773 | 0.804055577 |
| -0.1079354 | cg00974255 | 17 | 0.00055136 | 0.687518098 |
| -0.1007659 | cg05144620 | 17 | 0.00251421 | 0.458635555 |
| -0.1326929 | cg26161816 | 19 | 0.0218487  | 0.824320793 |
| -0.1505039 | cg21550107 | 5  | 0.01001718 | 0.672873751 |
| -0.1115409 | cg00806644 | 10 | 0.0325528  | 0.509824163 |
| -0.1086798 | cg17159058 | 8  | 0.00528834 | 0.248805269 |
| -0.2888627 | cg17534999 | 11 | 0.02811542 | 0.611260723 |
| -0.2786664 | cg06434490 | 6  | 0.01132204 | 0.792093554 |
| -0.207072  | cg19233156 | 19 | 0.01235588 | 0.437165736 |
| -0.1735571 | cg19234738 | 3  | 0.00396152 | 0.507607853 |
| -0.1459464 | cg13732465 | 9  | 0.00229603 | 0.732354633 |
| -0.1187255 | cg25398315 | 8  | 0.00493321 | 0.543298416 |
| -0.1066222 | cg05512561 | 13 | 0.0039235  | 0.472313594 |
| -0.1423099 | cg13979708 | 6  | 0.0295908  | 0.681140003 |
| -0.1057053 | cg06894134 | 6  | 0.00440569 | 0.752940195 |
| -0.1104539 | cg03024791 | 11 | 0.00083907 | 0.488312159 |
| -0.1125113 | cg03660096 | 8  | 0.01769247 | 0.781169297 |
| -0.2371345 | cg11161597 | 12 | 0.00157885 | 0.651419062 |
| -0.1873214 | cg04427254 | 19 | 0.00071222 | 0.298776261 |
| -0.1393443 | cg00386035 | 6  | 0.02100836 | 0.840717701 |
| -0.121805  | cg07076836 | 15 | 0.03559826 | 0.785719599 |
| -0.1950111 | cg27385193 | 7  | 0.02972802 | 0.697809801 |
| -0.1839618 | cg25439798 | 21 | 0.00525614 | 0.819543367 |
| -0.1703149 | cg04500909 | 5  | 0.01651741 | 0.818994028 |
| -0.1383364 | cg07476923 | 5  | 0.0010483  | 0.390919029 |

|            |               |    |            |             |
|------------|---------------|----|------------|-------------|
| -0.1271232 | cg25973282    | 13 | 0.03197984 | 0.712451404 |
| -0.1232857 | cg27272363    | 8  | 0.00696053 | 0.592333155 |
| -0.1090334 | cg11370814    | 2  | 0.02671807 | 0.517054197 |
| -0.1085663 | cg14785064    | 2  | 0.02632236 | 0.552229749 |
| -0.1655531 | cg17796982    | 8  | 0.01377659 | 0.719094566 |
| -0.1243776 | cg11111372    | 7  | 0.00377432 | 0.450134676 |
| -0.1506969 | cg08454455    | 16 | 0.0029412  | 0.61318052  |
| -0.1210143 | cg04095327    | 5  | 0.00380532 | 0.436352236 |
| -0.2897793 | cg01360605    | 20 | 0.00888938 | 0.4453898   |
| -0.1839835 | cg20312077    | 8  | 0.01369118 | 0.575003758 |
| -0.1837468 | cg11690884    | 2  | 0.00016571 | 0.299703897 |
| -0.1834552 | cg25354587    | 12 | 0.00280912 | 0.374848522 |
| -0.156072  | cg14366742    | 4  | 0.00701713 | 0.417912886 |
| -0.1442776 | cg16412772    | 8  | 0.04321749 | 0.860414717 |
| -0.144103  | cg03032497    | 14 | 0.00581964 | 0.578232211 |
| -0.134344  | cg24710503    | 11 | 0.01132836 | 0.803467507 |
| -0.1212217 | cg08108965    | 1  | 0.01766129 | 0.674334414 |
| -0.1177526 | cg16640358    | 2  | 0.01622806 | 0.464695228 |
| -0.2486086 | cg10615765    | 5  | 0.00770827 | 0.646790788 |
| -0.2189873 | cg00063982    | 1  | 0.02300033 | 0.874535041 |
| -0.2106491 | cg00269817    | 8  | 0.02135763 | 0.470380092 |
| -0.2049781 | cg00971695    | 14 | 0.04264043 | 0.805571894 |
| -0.1990291 | cg09533845    | 8  | 0.01175297 | 0.427065119 |
| -0.1889847 | cg02997560    | 19 | 0.03547513 | 0.535045591 |
| -0.1843317 | cg13155421    | 3  | 0.03259306 | 0.726718714 |
| -0.1656987 | cg03108347    | 11 | 0.02537165 | 0.812093296 |
| -0.1633415 | cg13452961    | 9  | 0.01593117 | 0.484806394 |
| -0.1618448 | cg23201812    | 11 | 0.00466594 | 0.236136544 |
| -0.1604358 | ch.8.2335308R | 8  | 0.01129525 | 0.208927512 |
| -0.1599757 | cg12228534    | 19 | 0.00337168 | 0.642831859 |
| -0.1588446 | cg12894371    | 6  | 0.00648112 | 0.593620532 |
| -0.1576069 | cg13725087    | 9  | 0.03324111 | 0.272654079 |
| -0.1574894 | cg14462040    | 9  | 0.03671651 | 0.679645751 |
| -0.1549591 | cg13258131    | 2  | 0.00700527 | 0.667677563 |
| -0.1524299 | cg10577819    | 2  | 0.01694489 | 0.76422118  |
| -0.1523116 | cg02932364    | 1  | 0.02554189 | 0.614442065 |
| -0.1475767 | cg16444607    | 2  | 0.03776076 | 0.679961724 |
| -0.145913  | cg16479476    | 6  | 0.03178618 | 0.700046252 |
| -0.1427031 | cg26118643    | 1  | 0.00240336 | 0.673363232 |
| -0.1421794 | cg08737338    | 2  | 0.00366088 | 0.725389394 |
| -0.1315618 | cg25920191    | 10 | 0.03562151 | 0.691442534 |
| -0.1311876 | cg12197573    | 18 | 0.00213701 | 0.485873226 |
| -0.130868  | cg00927256    | 2  | 0.01292526 | 0.724445211 |
| -0.1260712 | cg05189730    | 10 | 0.0014581  | 0.639347025 |
| -0.1231234 | cg06705017    | 18 | 0.04683216 | 0.651513876 |
| -0.1228063 | cg10397082    | 2  | 0.03691626 | 0.461413701 |

|            |              |    |            |             |
|------------|--------------|----|------------|-------------|
| -0.1179643 | cg14918548   | 2  | 0.0048595  | 0.480911783 |
| -0.117488  | cg00399683   | 7  | 0.013121   | 0.83149012  |
| -0.1165101 | cg17172308   | 6  | 0.0144692  | 0.788761878 |
| -0.1139575 | cg15657220   | 18 | 0.00902486 | 0.756298704 |
| -0.1136252 | cg19118751   | 17 | 0.02228997 | 0.497407032 |
| -0.1135356 | cg02073304   | 1  | 0.0231736  | 0.726943395 |
| -0.1133009 | cg07455757   | 16 | 0.00220475 | 0.663879575 |
| -0.1132507 | cg15583285   | 6  | 0.0002975  | 0.332779614 |
| -0.1125509 | cg09757158   | 2  | 0.00137324 | 0.713347331 |
| -0.1112798 | cg06110575   | 2  | 0.02482943 | 0.559802165 |
| -0.1111024 | cg26533311   | 6  | 0.01092488 | 0.424750341 |
| -0.1104264 | cg06581409   | 19 | 0.01581385 | 0.550588007 |
| -0.1089922 | cg00253248   | 17 | 0.01394049 | 0.688450702 |
| -0.1082966 | cg17922359   | 4  | 0.00050414 | 0.659517128 |
| -0.107888  | cg19998533   | 7  | 0.03344353 | 0.711852023 |
| -0.107632  | cg13945880   | 5  | 0.01236203 | 0.800605945 |
| -0.1056166 | cg04821993   | 7  | 0.02268635 | 0.403398051 |
| -0.1055025 | cg21551253   | 12 | 0.00322496 | 0.622284464 |
| -0.1032435 | cg11721349   | 6  | 0.00630328 | 0.292917887 |
| -0.1019928 | cg04710528   | 16 | 0.00102931 | 0.358792136 |
| -0.1011912 | cg20405742   | 6  | 0.03795659 | 0.654300551 |
| -0.1010628 | cg14097568   | 1  | 0.02017183 | 0.85277813  |
| -0.1005344 | cg11261850   | 11 | 0.00694282 | 0.546629209 |
| -0.1003066 | cg24753988   | 14 | 0.01379393 | 0.630357746 |
| -0.1413524 | cg17136275   | 1  | 0.01448667 | 0.612308679 |
| -0.1355726 | cg15255086   | 17 | 0.0070625  | 0.413903667 |
| -0.2409587 | cg05612608   | 3  | 0.02086509 | 0.729490862 |
| -0.2151682 | cg11597902   | 17 | 0.00434257 | 0.836159416 |
| -0.2114449 | cg18235078   | 12 | 0.01049739 | 0.764872302 |
| -0.2053743 | cg11374933   | 8  | 0.00305205 | 0.472892929 |
| -0.158745  | cg17247190   | 6  | 0.00744348 | 0.287815463 |
| -0.1485713 | cg10256255   | 2  | 0.00090542 | 0.885619982 |
| -0.1368691 | cg08814800   | 4  | 0.00013657 | 0.457291336 |
| -0.1322753 | cg22164009   | 6  | 0.03089066 | 0.484480353 |
| -0.1305577 | cg08800670   | 6  | 0.02105796 | 0.677747331 |
| -0.1228659 | cg17588094   | 8  | 0.00591777 | 0.803249979 |
| -0.1165077 | cg25662822   | 3  | 0.01031233 | 0.739570632 |
| -0.1142887 | cg15281710   | 15 | 0.00464224 | 0.827574168 |
| -0.1131925 | cg22005336   | 5  | 0.01869499 | 0.411560814 |
| -0.12293   | cg04075781   | 3  | 0.0043874  | 0.523120511 |
| -0.1484081 | cg14630001   | 3  | 0.00088822 | 0.605776044 |
| -0.1072401 | cg07737182   | 1  | 0.01349415 | 0.7123438   |
| -0.1963651 | ch.4.194519R | 4  | 0.00397229 | 0.32471309  |
| -0.110453  | cg17816357   | 7  | 0.00545547 | 0.635788102 |
| -0.1287179 | cg12635790   | 8  | 0.03848639 | 0.58414742  |
| -0.1189166 | cg08022281   | 6  | 0.02533268 | 0.702192265 |

|            |            |    |            |             |
|------------|------------|----|------------|-------------|
| -0.1543721 | cg16308270 | 1  | 0.0105422  | 0.380237482 |
| -0.1068908 | cg04206637 | 5  | 0.00139314 | 0.565726787 |
| -0.2615118 | cg03261725 | 17 | 0.00341549 | 0.700227116 |
| -0.168468  | cg04843568 | 5  | 0.01122554 | 0.364606969 |
| -0.1657234 | cg11034978 | 11 | 0.02782288 | 0.439449911 |
| -0.1213271 | cg16404784 | 14 | 0.01467509 | 0.521135882 |
| -0.1452134 | cg20168495 | 4  | 0.00723386 | 0.800838299 |
| -0.1323426 | cg17064090 | 11 | 0.01467603 | 0.552097273 |
| -0.1399308 | cg05810177 | 7  | 0.00150087 | 0.765113101 |
| -0.1326005 | cg26015163 | 13 | 0.00288323 | 0.470416892 |
| -0.1066083 | cg26426334 | 1  | 0.01285423 | 0.480473917 |
| -0.1819069 | cg26027052 | 6  | 0.00830708 | 0.299188611 |
| -0.1495211 | cg22540040 | 12 | 0.00582777 | 0.523611152 |
| -0.1205809 | cg20801645 | 15 | 0.0244864  | 0.596336277 |
| -0.1023053 | cg03262802 | 2  | 0.00581404 | 0.777303202 |
| -0.1048231 | cg07191524 | 16 | 0.0128584  | 0.703391704 |
| -0.1541653 | cg11176481 | 5  | 0.027524   | 0.410236213 |
| -0.1356209 | cg11492723 | 3  | 0.00067267 | 0.366898271 |
| -0.1253145 | cg25794147 | 7  | 5.40E-05   | 0.367274596 |
| -0.1070922 | cg22341513 | 18 | 0.00145034 | 0.523614058 |
| -0.162649  | cg01901101 | 1  | 0.02117668 | 0.823065078 |
| -0.1763556 | cg01577678 | 16 | 0.00509558 | 0.741855261 |
| -0.2129618 | cg08241307 | 11 | 0.00148372 | 0.388461198 |
| -0.1812155 | cg06178669 | 11 | 0.01089849 | 0.571645112 |
| -0.1656    | cg21832142 | 3  | 0.00902378 | 0.35745056  |
| -0.1352168 | cg01450566 | 20 | 0.00156609 | 0.655329703 |
| -0.1313027 | cg11553618 | 4  | 0.02362721 | 0.513578837 |
| -0.1308775 | cg18537464 | 18 | 0.02484624 | 0.634889658 |
| -0.1129134 | cg19045700 | 4  | 0.02146523 | 0.590815581 |
| -0.1119167 | cg21502476 | 3  | 0.0179272  | 0.481746587 |
| -0.1612556 | cg00321614 | 5  | 0.00750419 | 0.410290925 |
| -0.1600986 | cg03309393 | 6  | 0.00804034 | 0.811678061 |
| -0.1260356 | cg14531834 | 9  | 0.02675797 | 0.76397745  |
| -0.1276373 | cg04203453 | 8  | 0.00562945 | 0.401160172 |
| -0.1633872 | cg01977798 | 1  | 0.0078912  | 0.851849562 |
| -0.1018312 | cg14747132 | 12 | 0.03008509 | 0.653859648 |
| -0.1009637 | cg06828143 | 5  | 0.02651006 | 0.444427083 |
| -0.1154612 | cg03263730 | 1  | 0.01464967 | 0.816801053 |
| -0.179749  | cg03116182 | 11 | 0.00163867 | 0.414329366 |
| -0.1510116 | cg25503888 | 3  | 0.00408183 | 0.447235983 |
| -0.1559587 | cg25631739 | 5  | 5.22E-05   | 0.275703617 |
| -0.1018724 | cg05148180 | 10 | 0.02231618 | 0.662331971 |
| -0.1110479 | cg04316353 | 6  | 0.01414842 | 0.726732243 |
| -0.1002987 | cg23542902 | 3  | 0.00027715 | 0.318965375 |
| -0.1081079 | cg02134839 | 17 | 0.00623632 | 0.691657031 |
| -0.25732   | cg00121876 | 6  | 0.02059713 | 0.831042356 |

|            |            |    |            |             |
|------------|------------|----|------------|-------------|
| -0.1364499 | cg20685713 | 1  | 0.00647788 | 0.583072865 |
| -0.1181254 | cg10925915 | 3  | 0.04176855 | 0.597061305 |
| -0.1026978 | cg01558960 | 16 | 0.04099429 | 0.657894229 |
| -0.1404643 | cg27380715 | 17 | 0.00618282 | 0.54561226  |
| -0.127957  | cg08281371 | 17 | 0.03849041 | 0.589910981 |
| -0.1002969 | cg16799831 | 6  | 0.00689937 | 0.42644307  |
| -0.1715323 | cg04057599 | 11 | 0.01204766 | 0.823550332 |
| -0.110781  | cg09140029 | 6  | 0.02520547 | 0.390349384 |
| -0.1886342 | cg01848115 | 21 | 0.04237428 | 0.511372489 |
| -0.1034573 | cg17765025 | 2  | 0.00906245 | 0.798318681 |
| -0.1769708 | cg09121680 | 7  | 0.00230751 | 0.434297858 |
| -0.1203348 | cg09539496 | 8  | 0.00637775 | 0.693492332 |
| -0.1388139 | cg10274208 | 13 | 0.0363319  | 0.742057358 |
| -0.1832844 | cg19019849 | 4  | 0.00308551 | 0.656774307 |
| -0.1867027 | cg16135989 | 5  | 0.00582835 | 0.429597895 |
| -0.2265202 | cg10620680 | 1  | 0.01868664 | 0.761311635 |
| -0.1589947 | cg16701896 | 7  | 0.00679454 | 0.742197638 |
| -0.1494617 | cg02296931 | 1  | 0.01675705 | 0.662186354 |
| -0.118369  | cg12362478 | 7  | 0.00586192 | 0.505837053 |
| -0.1533742 | cg15677600 | 5  | 0.00696323 | 0.592945893 |
| -0.1529008 | cg08655662 | 6  | 0.00041647 | 0.648380075 |
| -0.1421433 | cg07612923 | 3  | 0.00501281 | 0.283560346 |
| -0.1023341 | cg06025774 | 5  | 0.02326767 | 0.665951728 |
| -0.1574973 | cg27200630 | 3  | 0.0128181  | 0.460901971 |
| -0.1178447 | cg14719333 | 17 | 0.01519166 | 0.663406427 |
| -0.1025063 | cg19549902 | 7  | 0.00053204 | 0.884888234 |
| -0.104955  | cg07089056 | 3  | 0.00201344 | 0.385764175 |
| -0.1039048 | cg06579481 | 7  | 0.03829792 | 0.530669159 |
| -0.1816916 | cg13324311 | 7  | 0.00590556 | 0.613713418 |
| -0.163919  | cg01514353 | 22 | 0.00154897 | 0.462512134 |
| -0.160469  | cg01482969 | 11 | 0.01755968 | 0.381763271 |
| -0.1315611 | cg22822656 | 8  | 0.00837816 | 0.352400358 |
| -0.1274794 | cg17051543 | 10 | 0.02116803 | 0.551689372 |
| -0.1027868 | cg24882709 | 10 | 0.00217209 | 0.806644155 |
| -0.1593064 | cg00168634 | 4  | 0.01424049 | 0.420114587 |
| -0.1694706 | cg02104392 | 2  | 0.00236096 | 0.799378656 |
| -0.1247528 | cg10327067 | 8  | 0.0006412  | 0.321567168 |
| -0.1067737 | cg14184907 | 12 | 0.03819602 | 0.676602615 |
| -0.1427226 | cg10794973 | 6  | 0.02071636 | 0.804162727 |
| -0.1356616 | cg09266080 | 10 | 0.03484615 | 0.634566603 |
| -0.1070225 | cg13638282 | 9  | 0.03849427 | 0.697659223 |
| -0.128048  | cg03983740 | 10 | 0.0275951  | 0.589897611 |
| -0.1090625 | cg17989763 | 10 | 0.00180584 | 0.829752225 |
| -0.1389604 | cg14398113 | 15 | 0.02970508 | 0.777649548 |
| -0.167714  | cg26915329 | 13 | 0.00063947 | 0.460275442 |
| -0.1352674 | cg01966974 | 1  | 0.0115552  | 0.713267736 |

|            |            |    |            |             |
|------------|------------|----|------------|-------------|
| -0.1340166 | cg26283879 | 8  | 0.04429507 | 0.694731865 |
| -0.1133718 | cg14785579 | 18 | 0.04824442 | 0.824055235 |
| -0.1624951 | cg12387205 | 2  | 0.01873899 | 0.800307421 |
| -0.1592819 | cg11676189 | 2  | 0.03464014 | 0.515657904 |
| -0.1351006 | cg10723431 | 14 | 0.01947387 | 0.691471893 |
| -0.1292886 | cg23634401 | 15 | 0.02415958 | 0.592168252 |
| -0.1155967 | cg00760950 | 13 | 0.00097451 | 0.763751932 |
| -0.1915284 | cg07082447 | 11 | 0.04090941 | 0.682476762 |
| -0.1149044 | cg08082810 | 14 | 0.0102033  | 0.776135471 |
| -0.1522954 | cg05460050 | 7  | 0.00673893 | 0.483597563 |
| -0.1509446 | cg08986840 | 8  | 0.01318508 | 0.302606873 |
| -0.1239406 | cg03247944 | 12 | 0.00807765 | 0.508973324 |
| -0.1188991 | cg00035969 | 1  | 0.00648924 | 0.716429152 |
| -0.1730251 | cg04921646 | 1  | 0.00761688 | 0.879540805 |
| -0.1775943 | cg13097800 | 14 | 0.00016652 | 0.618973938 |
| -0.2152292 | cg05209996 | 11 | 0.0036499  | 0.359421361 |
| -0.2071102 | cg08243401 | 13 | 0.01312601 | 0.774447873 |
| -0.1511852 | cg27478863 | 13 | 5.22E-05   | 0.292799837 |
| -0.1295072 | cg22021794 | 5  | 0.03335945 | 0.694937998 |
| -0.1082786 | cg18762500 | 6  | 0.00054621 | 0.535622126 |
| -0.1066287 | cg23753006 | 2  | 0.00730376 | 0.630679938 |
| -0.1710285 | cg13215862 | 15 | 0.00231025 | 0.479402874 |
| -0.1598946 | cg02395454 | 11 | 0.00633153 | 0.425160522 |
| -0.1103634 | cg17185404 | 3  | 0.00766333 | 0.795925968 |
| -0.1968831 | cg10068996 | 2  | 0.01198604 | 0.845117356 |
| -0.1669469 | cg06531870 | 13 | 0.007493   | 0.531503007 |
| -0.2144663 | cg09812990 | 16 | 0.01397188 | 0.563312847 |
| -0.1438063 | cg24285811 | 9  | 0.01230088 | 0.838836031 |
| -0.1281336 | cg25329164 | 7  | 0.00529548 | 0.472623374 |
| -0.1238036 | cg15297220 | 4  | 0.00143371 | 0.675658319 |
| -0.1118703 | cg21513088 | 2  | 0.02065879 | 0.714632503 |
| -0.1989716 | cg14054279 | 3  | 0.00917441 | 0.637468898 |
| -0.1591758 | cg25946790 | 14 | 0.00721292 | 0.432658373 |
| -0.1576433 | cg10330056 | 2  | 0.00066098 | 0.321366134 |
| -0.2063679 | cg26611765 | 7  | 0.01836833 | 0.549198621 |
| -0.1370392 | cg06825878 | 7  | 0.02335215 | 0.621371557 |
| -0.1073851 | cg07780762 | 1  | 0.00202728 | 0.478189007 |
| -0.1014316 | cg00132972 | 2  | 0.0095978  | 0.594980416 |
| -0.1409505 | cg00228735 | 7  | 0.01325888 | 0.659926449 |
| -0.1118439 | cg14378231 | 1  | 0.04701331 | 0.47124775  |
| -0.1089539 | cg07096763 | 1  | 0.01180553 | 0.45145213  |
| -0.1873442 | cg00045910 | 10 | 0.00311095 | 0.304837064 |
| -0.1466042 | cg27372452 | 15 | 0.01193169 | 0.738719839 |
| -0.1108868 | cg00513984 | 12 | 0.0075055  | 0.577328389 |
| -0.1202789 | cg19984681 | 3  | 0.00909446 | 0.688913796 |
| -0.1115078 | cg15469321 | 1  | 0.04557272 | 0.874866688 |



|            |            |    |            |             |
|------------|------------|----|------------|-------------|
| -0.1126606 | cg20171396 | 4  | 0.02028099 | 0.880621786 |
| -0.1354587 | cg15705813 | 2  | 0.04185464 | 0.52896008  |
| -0.2086548 | cg11594770 | 3  | 0.00545166 | 0.396468205 |
| -0.1686396 | cg00320288 | 16 | 0.01348136 | 0.869458739 |
| -0.3404019 | cg05234035 | 5  | 0.00045451 | 0.670547046 |
| -0.3277786 | cg10600730 | 20 | 0.01483233 | 0.678175107 |
| -0.3079339 | cg02849956 | 19 | 0.00317124 | 0.36469613  |
| -0.3070631 | cg02495743 | 11 | 0.0002117  | 0.269480545 |
| -0.26079   | cg00967073 | 1  | 0.00342347 | 0.3552472   |
| -0.1868317 | cg00096536 | 4  | 0.00329125 | 0.405395647 |
| -0.1255272 | cg27535677 | 6  | 0.03471821 | 0.740969643 |
| -0.1182271 | cg06719604 | 2  | 0.00283619 | 0.387142279 |
| -0.1378874 | cg08447373 | 5  | 0.01184727 | 0.425707376 |
| -0.1136655 | cg05057910 | 7  | 0.00371521 | 0.574002584 |
| -0.1458028 | cg13912307 | 11 | 0.00041647 | 0.658811132 |
| -0.193487  | cg08272572 | 19 | 0.00806242 | 0.552968646 |
| -0.1022329 | cg05289920 | 15 | 0.01324133 | 0.796057946 |
| -0.1354714 | cg09088153 | 15 | 0.0007126  | 0.818397606 |
| -0.1157315 | cg23646776 | 4  | 3.61E-05   | 0.244418956 |
| -0.1015515 | cg25017774 | 4  | 0.00324083 | 0.322470738 |
| -0.1029336 | cg24449914 | 1  | 8.49E-05   | 0.667421374 |
| -0.2152806 | cg06815411 | 4  | 0.00024695 | 0.285479191 |
| -0.1277934 | cg21503646 | 7  | 0.00762038 | 0.691202561 |
| -0.1201388 | cg03266686 | 2  | 0.00582855 | 0.687656047 |
| -0.179853  | cg23506042 | 5  | 0.02203705 | 0.36363627  |
| -0.1536769 | cg20432671 | 1  | 0.01187786 | 0.525007316 |
| -0.1023936 | cg08217163 | 2  | 0.00110142 | 0.70398293  |
| -0.1191877 | cg00890363 | 4  | 0.0148922  | 0.624492896 |
| -0.1071492 | cg00935653 | 7  | 0.01026045 | 0.823659756 |
| -0.203295  | cg05068866 | 3  | 0.00474445 | 0.765395669 |
| -0.1343139 | cg18643563 | 14 | 0.01941395 | 0.544151194 |
| -0.1017232 | cg24104268 | 6  | 0.00819895 | 0.535025772 |
| -0.1726511 | cg07915896 | 15 | 0.02575883 | 0.7938815   |
| -0.1624172 | cg11911550 | 5  | 0.00324261 | 0.35632855  |
| -0.1027904 | cg09832245 | 16 | 0.03175426 | 0.764346788 |
| -0.1356857 | cg06761220 | 2  | 0.00288382 | 0.653426996 |
| -0.1500833 | cg24491784 | 15 | 0.02993842 | 0.790780468 |
| -0.1222847 | cg27109912 | 17 | 0.01766792 | 0.515068686 |
| -0.100967  | cg26875626 | 4  | 0.03463774 | 0.818027192 |
| -0.1064169 | cg01771479 | 8  | 0.0098426  | 0.62745851  |
| -0.1628622 | cg07220152 | 6  | 0.03868535 | 0.44949179  |
| -0.1049144 | cg23598010 | 12 | 0.00410792 | 0.565070383 |
| -0.1221837 | cg18629151 | 4  | 0.01579563 | 0.803259246 |
| -0.1448342 | cg15657641 | 11 | 9.65E-05   | 0.368256319 |
| -0.1868045 | cg01833470 | 1  | 0.00645655 | 0.718649881 |
| -0.1013961 | cg18141622 | 2  | 0.02648384 | 0.659004769 |

|            |            |    |            |             |
|------------|------------|----|------------|-------------|
| -0.1357667 | cg26473548 | 5  | 0.00110133 | 0.419323855 |
| -0.1133759 | cg00366103 | 7  | 0.03895809 | 0.817868691 |
| -0.1505    | cg19788317 | 4  | 0.01135548 | 0.800836842 |
| -0.100011  | cg27166177 | 22 | 0.00362461 | 0.409774792 |
| -0.1824389 | cg01446989 | 1  | 0.02930182 | 0.681861596 |
| -0.1408229 | cg08493063 | 16 | 0.01677558 | 0.564840509 |
| -0.1464093 | cg13602461 | 8  | 0.00104853 | 0.693960536 |
| -0.1253342 | cg04686230 | 6  | 0.01084931 | 0.419248317 |
| -0.1486678 | cg26272651 | 8  | 0.03518742 | 0.718911119 |
| -0.1344586 | cg11470941 | 4  | 0.04459242 | 0.618365975 |
| -0.1148314 | cg05428701 | 11 | 0.02835893 | 0.769564897 |
| -0.1082401 | cg14955976 | 11 | 4.07E-05   | 0.315026297 |
| -0.1425342 | cg16721489 | 2  | 0.0032554  | 0.608998143 |
| -0.1560482 | cg09507761 | 5  | 0.00509232 | 0.549935841 |
| -0.188769  | cg00555816 | 13 | 0.04206855 | 0.658316133 |
| -0.1806336 | cg21943117 | 1  | 0.02671459 | 0.661727384 |
| -0.1843287 | cg16037200 | 15 | 0.0081565  | 0.340892039 |
| -0.1733184 | cg15128147 | 2  | 0.02064845 | 0.584155271 |
| -0.1678723 | cg07749597 | 5  | 0.03847318 | 0.765494171 |
| -0.2050406 | cg24082677 | 5  | 0.04473517 | 0.499502976 |
| -0.1420115 | cg15693793 | 1  | 0.02679171 | 0.822244284 |
| -0.1562281 | cg25101764 | 2  | 0.01321273 | 0.816187524 |
| -0.2135523 | cg11747594 | 6  | 0.04480399 | 0.786842253 |
| -0.1593551 | cg14746387 | 5  | 0.01938614 | 0.860435335 |
| -0.1309264 | cg23155333 | 19 | 0.00409332 | 0.634415423 |
| -0.1233582 | cg06755427 | 2  | 0.00560087 | 0.572730771 |
| -0.1125666 | cg06547209 | 5  | 0.04720009 | 0.600958447 |
| -0.1073603 | cg14031473 | 9  | 0.02481258 | 0.527529967 |
| -0.107181  | cg06222012 | 2  | 0.01403804 | 0.628996685 |
| -0.1487029 | cg19746982 | 18 | 0.0131643  | 0.700681656 |
| -0.1543385 | cg21221767 | 14 | 0.04660695 | 0.727983077 |
| -0.133507  | cg17654419 | 2  | 0.03164208 | 0.741918743 |
| -0.2188393 | cg17896243 | 8  | 0.00513798 | 0.444227808 |
| -0.1892282 | cg12810503 | 7  | 0.02533341 | 0.597271706 |
| -0.1696718 | cg02803141 | 16 | 0.00166906 | 0.851526718 |
| -0.160227  | cg22730655 | 1  | 0.00715442 | 0.524189078 |
| -0.1280824 | cg20945764 | 3  | 0.01236186 | 0.571772626 |
| -0.1117574 | cg17598999 | 5  | 0.00181396 | 0.490265895 |
| -0.1563134 | cg18995788 | 8  | 0.00395367 | 0.806180249 |
| -0.1263822 | cg02563407 | 11 | 0.04425783 | 0.677703329 |
| -0.175548  | cg27058077 | 1  | 0.00997936 | 0.637378165 |
| -0.131702  | cg23591955 | 14 | 0.00716697 | 0.45271164  |
| -0.1263845 | cg09652509 | 3  | 0.03269781 | 0.639602546 |
| -0.2009956 | cg11761728 | 4  | 0.0002944  | 0.467969399 |
| -0.2259121 | cg00320597 | 8  | 0.027126   | 0.771216564 |
| -0.1005436 | cg03998835 | 6  | 0.03146201 | 0.515556059 |

|            |            |    |            |             |
|------------|------------|----|------------|-------------|
| -0.1272231 | cg13838276 | 6  | 0.01754319 | 0.337043447 |
| -0.2329807 | cg02944084 | 17 | 0.00025107 | 0.512878098 |
| -0.1876345 | cg14422498 | 9  | 0.01300938 | 0.577055195 |
| -0.1600676 | cg25324047 | 10 | 0.01817083 | 0.774752659 |
| -0.1119738 | cg08943293 | 1  | 0.04669158 | 0.73622248  |
| -0.1034883 | cg10521147 | 13 | 0.00181226 | 0.377876062 |
| -0.1343565 | cg18518916 | 4  | 0.03550522 | 0.754069817 |
| -0.1314336 | cg00580562 | 10 | 0.01401108 | 0.514461052 |
| -0.1257121 | cg26648203 | 2  | 0.0031712  | 0.506859781 |
| -0.1051302 | cg26257082 | 1  | 0.01775228 | 0.3073541   |
| -0.2051995 | cg20799176 | 11 | 0.00593859 | 0.411018208 |
| -0.1430414 | cg09654261 | 11 | 0.0070385  | 0.634438186 |
| -0.1276488 | cg13432339 | 4  | 0.02324831 | 0.51952422  |
| -0.1955036 | cg20475082 | 2  | 0.0170536  | 0.610434786 |
| -0.1693043 | cg04770088 | 17 | 0.0367888  | 0.701671459 |
| -0.1518684 | cg22538557 | 19 | 0.00961667 | 0.655721371 |
| -0.1504323 | cg11760395 | 10 | 0.0247379  | 0.590552367 |
| -0.1398886 | cg11225089 | 5  | 0.03437988 | 0.681359703 |
| -0.1244196 | cg06508062 | 21 | 0.03181709 | 0.808274271 |
| -0.1152022 | cg17273911 | 11 | 0.00868275 | 0.510510672 |
| -0.1024045 | cg07805040 | 13 | 0.00118547 | 0.426051771 |
| -0.1457916 | cg12378001 | 7  | 0.00535967 | 0.775086497 |
| -0.1416816 | cg23739746 | 13 | 0.00035402 | 0.416131323 |
| -0.1973975 | cg06276810 | 6  | 0.02610732 | 0.643657934 |
| -0.1916913 | cg03959186 | 2  | 0.007957   | 0.376144045 |
| -0.1538686 | cg05117638 | 6  | 0.02427871 | 0.869716064 |
| -0.1383844 | cg17947364 | 6  | 0.0051993  | 0.844693828 |
| -0.1562679 | cg09714919 | 16 | 0.00055632 | 0.626855366 |
| -0.1009305 | cg13390361 | 8  | 0.00458959 | 0.767015032 |
| -0.1513449 | cg04494873 | 5  | 0.00669525 | 0.561397102 |
| -0.1550461 | cg19868364 | 14 | 0.01775445 | 0.351523894 |
| -0.142931  | cg21758140 | 2  | 0.00454023 | 0.48118689  |
| -0.1366925 | cg20867674 | 6  | 0.01382862 | 0.548829154 |
| -0.1200983 | cg16204717 | 12 | 0.01448895 | 0.454075215 |
| -0.1191245 | cg06710328 | 11 | 0.02735611 | 0.546520796 |
| -0.1880065 | cg07030516 | 10 | 0.03558831 | 0.612710484 |
| -0.1751388 | cg07559178 | 14 | 0.01319639 | 0.61618077  |
| -0.1628431 | cg13185005 | 11 | 0.02973145 | 0.685819512 |
| -0.144858  | cg02612397 | 6  | 0.00426214 | 0.509586546 |
| -0.1301326 | cg12635314 | 10 | 0.016415   | 0.810559063 |
| -0.1286888 | cg07505018 | 16 | 0.00066009 | 0.668228448 |
| -0.1332579 | cg22364204 | 11 | 0.00427683 | 0.648345854 |
| -0.1158423 | cg09477232 | 7  | 0.0133901  | 0.767230926 |
| -0.1045552 | cg20873416 | 6  | 0.04730317 | 0.786466415 |
| -0.1982092 | cg07302051 | 16 | 0.01017608 | 0.44119499  |
| -0.1243978 | cg25483123 | 12 | 0.01243631 | 0.773666183 |

|            |                 |    |            |             |
|------------|-----------------|----|------------|-------------|
| -0.1427036 | cg00151251      | 2  | 0.00075679 | 0.459035388 |
| -0.1701861 | cg05871756      | 5  | 0.02212219 | 0.469534133 |
| -0.1636649 | cg26296781      | 7  | 0.02532412 | 0.399685509 |
| -0.131936  | cg09030187      | 1  | 0.01421853 | 0.596439791 |
| -0.1290566 | cg09965264      | 15 | 0.00804626 | 0.526099002 |
| -0.1998233 | cg24617444      | 10 | 0.0060865  | 0.451184107 |
| -0.1672644 | cg04224025      | 1  | 0.00351245 | 0.774631666 |
| -0.1240047 | cg13426642      | 12 | 0.00908993 | 0.707961747 |
| -0.1244887 | cg02338840      | 2  | 0.00132293 | 0.784244811 |
| -0.1507962 | cg21535606      | 1  | 0.01353055 | 0.790003566 |
| -0.107811  | ch.2.105901354F | 2  | 0.00050349 | 0.333489633 |
| -0.2235857 | cg06878499      | 1  | 0.01827219 | 0.794858164 |
| -0.1221881 | cg25607177      | 11 | 0.02367482 | 0.707433822 |
| -0.1203628 | cg12106403      | 19 | 0.01972819 | 0.737331388 |
| -0.106799  | cg05207637      | 16 | 0.0009872  | 0.567947961 |
| -0.1206704 | cg18739675      | 2  | 0.00861951 | 0.855969542 |
| -0.1434462 | cg04728978      | 2  | 0.0007317  | 0.725840813 |
| -0.1415236 | cg10168494      | 3  | 0.02651682 | 0.683495215 |
| -0.1248474 | cg26113233      | 5  | 0.00796038 | 0.614066083 |
| -0.1176049 | cg19589396      | 8  | 0.00256301 | 0.73990768  |
| -0.147612  | cg02131018      | 3  | 0.01654154 | 0.512374659 |
| -0.1195239 | cg14830485      | 20 | 0.02074741 | 0.523928837 |
| -0.1125052 | cg12071775      | 14 | 0.00058463 | 0.355232665 |
| -0.1555734 | cg16060189      | 10 | 0.01267749 | 0.679082472 |
| -0.1112492 | cg06822690      | 1  | 0.004821   | 0.533498091 |
| -0.1064373 | cg11754778      | 1  | 0.01648236 | 0.713288222 |
| -0.1752873 | cg26104072      | 5  | 0.0090773  | 0.510041377 |
| -0.1363929 | cg26540315      | 11 | 0.00245155 | 0.77100661  |
| -0.1060095 | cg27381488      | 16 | 0.0017168  | 0.375930694 |
| -0.1636341 | cg14189786      | 8  | 0.04068577 | 0.867182467 |
| -0.1455979 | cg21082028      | 17 | 0.01352508 | 0.732691841 |
| -0.2025045 | cg11964099      | 17 | 0.011311   | 0.597445938 |
| -0.1137867 | cg19148305      | 22 | 0.00299528 | 0.637382541 |
| -0.1615661 | cg07339138      | 3  | 0.00513721 | 0.789067146 |
| -0.1188961 | cg08837626      | 7  | 0.0178211  | 0.672731458 |
| -0.1166297 | cg07213119      | 4  | 0.03887592 | 0.707002056 |
| -0.1017426 | cg11624328      | 5  | 0.01955113 | 0.67925407  |
| -0.1598235 | cg12177851      | 15 | 0.03414579 | 0.741219556 |
| -0.1388579 | cg03059649      | 5  | 0.00089229 | 0.524903656 |
| -0.1247385 | cg27282397      | 2  | 0.0360259  | 0.803128559 |
| -0.1129457 | cg14718363      | 2  | 0.01567556 | 0.616667107 |
| -0.1678691 | cg07700233      | 4  | 0.03477734 | 0.806461469 |
| -0.1170031 | cg09051342      | 8  | 0.03659841 | 0.539888625 |
| -0.1387617 | cg25975690      | 7  | 0.01153346 | 0.826021043 |
| -0.1056128 | cg10721538      | 17 | 0.01141165 | 0.522725215 |
| -0.1335288 | cg11792671      | 2  | 0.01113474 | 0.602176186 |

|            |            |    |            |             |
|------------|------------|----|------------|-------------|
| -0.1202256 | cg09599062 | 3  | 0.04751536 | 0.638456806 |
| -0.11672   | cg19824055 | 6  | 0.0003561  | 0.6243806   |
| -0.1215984 | cg19061690 | 17 | 0.00303036 | 0.400675258 |
| -0.1906158 | cg24232510 | 2  | 0.04546847 | 0.690947812 |
| -0.1867729 | cg18234224 | 1  | 0.00828186 | 0.878087293 |
| -0.1611437 | cg03499161 | 12 | 0.00094031 | 0.390503753 |
| -0.1177904 | cg00583068 | 1  | 0.02396889 | 0.737906783 |
| -0.1676907 | cg20708282 | 5  | 0.01962093 | 0.732114362 |
| -0.1463243 | cg19530168 | 11 | 0.03434194 | 0.542045222 |
| -0.1308596 | cg02682520 | 5  | 0.00190885 | 0.334666664 |
| -0.1233786 | cg09225373 | 6  | 0.00028216 | 0.372802527 |
| -0.1032034 | cg16230352 | 8  | 0.03458106 | 0.67757828  |
| -0.1047146 | cg26720452 | 8  | 0.0012069  | 0.513933179 |
| -0.1384445 | cg19111408 | 15 | 0.0043204  | 0.535650112 |
| -0.1075843 | cg04759376 | 10 | 0.00967916 | 0.558172154 |
| -0.1680973 | cg14699112 | 4  | 0.00020042 | 0.857551817 |
| -0.1671859 | cg13670898 | 14 | 0.01292415 | 0.624005914 |
| -0.1646599 | cg23091159 | 4  | 0.04494679 | 0.757538155 |
| -0.1448593 | cg09395805 | 6  | 0.01815408 | 0.625077547 |
| -0.1148483 | cg09544144 | 4  | 0.02019902 | 0.718917174 |
| -0.106878  | cg06432309 | 16 | 0.01040174 | 0.273741736 |
| -0.1976425 | cg21913652 | 11 | 0.00519168 | 0.792933581 |
| -0.1842482 | cg24610561 | 11 | 0.02343795 | 0.804522381 |
| -0.182993  | cg03317642 | 5  | 0.00647061 | 0.500859648 |
| -0.1796247 | cg15732079 | 7  | 0.02434447 | 0.572170708 |
| -0.1752372 | cg21211664 | 9  | 0.00834503 | 0.760076794 |
| -0.1724961 | cg19637330 | 1  | 0.00679194 | 0.459011392 |
| -0.1715543 | cg15321306 | 12 | 0.01962222 | 0.871782911 |
| -0.139433  | cg06677416 | 10 | 0.01791331 | 0.78534742  |
| -0.1207769 | cg03906681 | 15 | 0.02834409 | 0.693531111 |
| -0.1106181 | cg00024989 | 19 | 0.00015801 | 0.413493872 |
| -0.1091617 | cg26123824 | 10 | 0.00950359 | 0.630521687 |
| -0.1080931 | cg20012607 | 13 | 0.00237505 | 0.384613439 |
| -0.1018637 | cg15509286 | 3  | 0.00310446 | 0.66627958  |
| -0.1326285 | cg10840277 | 8  | 0.00611223 | 0.794591614 |
| -0.1131488 | cg04137004 | 11 | 0.00647789 | 0.788243919 |
| -0.1152584 | cg14213105 | 9  | 0.02407804 | 0.684844617 |
| -0.1299832 | cg01771065 | 14 | 0.03382016 | 0.764396936 |
| -0.1238503 | cg16041686 | 4  | 0.00090245 | 0.371636948 |
| -0.122999  | cg27324117 | 4  | 0.0050545  | 0.741579333 |
| -0.1322982 | cg04184019 | 4  | 0.00700386 | 0.386315019 |
| -0.2087146 | cg09772075 | 8  | 0.00156528 | 0.626420054 |
| -0.1458824 | cg22012281 | 22 | 0.01390014 | 0.576555363 |
| -0.1155999 | cg10132704 | 7  | 0.00661938 | 0.771488513 |
| -0.1971779 | cg08510178 | 6  | 0.00472476 | 0.510044041 |
| -0.1929118 | cg25341313 | 1  | 0.00678009 | 0.446114118 |

|            |            |    |            |             |
|------------|------------|----|------------|-------------|
| -0.1192889 | cg04060356 | 20 | 0.00798338 | 0.2651046   |
| -0.1152471 | cg23052585 | 10 | 0.03406282 | 0.35328018  |
| -0.1713648 | cg26117369 | 13 | 0.02051533 | 0.578854551 |
| -0.1091334 | cg17180237 | 1  | 0.031656   | 0.661789562 |
| -0.1062138 | cg19462210 | 11 | 0.00893591 | 0.75160715  |
| -0.1066916 | cg21557087 | 2  | 0.00126955 | 0.801916157 |
| -0.2546896 | cg21614723 | 17 | 0.03681899 | 0.532439186 |
| -0.2404764 | cg03188000 | 12 | 0.02936365 | 0.616456979 |
| -0.1723194 | cg00055986 | 5  | 0.02146969 | 0.59370463  |
| -0.1542151 | cg11955727 | 2  | 0.00392894 | 0.844910719 |
| -0.152402  | cg15647364 | 1  | 0.01517271 | 0.502141607 |
| -0.10871   | cg02224021 | 19 | 0.00309652 | 0.510065776 |
| -0.1183253 | cg08461576 | 4  | 0.01473381 | 0.724932914 |
| -0.1805366 | cg05854694 | 14 | 0.00055779 | 0.773059579 |
| -0.1353916 | cg11678250 | 7  | 0.01373506 | 0.691741792 |
| -0.1069252 | cg06623778 | 1  | 0.01161015 | 0.585014164 |
| -0.1180751 | cg08866665 | 6  | 0.00417309 | 0.492418409 |
| -0.1678714 | cg20056997 | 2  | 0.01477902 | 0.452980748 |
| -0.1167499 | cg01438291 | 11 | 0.00153318 | 0.359599028 |
| -0.1112714 | cg11260715 | 7  | 0.00245155 | 0.443986093 |
| -0.1058046 | cg06338376 | 20 | 0.03643959 | 0.713372199 |
| -0.1341426 | cg10850823 | 5  | 0.02062352 | 0.618846579 |
| -0.102401  | cg22005990 | 17 | 0.0121202  | 0.515336158 |
| -0.103627  | cg26556489 | 18 | 0.00786351 | 0.71066196  |
| -0.2325745 | cg00568910 | 1  | 0.03977688 | 0.755709008 |
| -0.198032  | cg15825304 | 2  | 0.0206525  | 0.788828771 |
| -0.1157285 | cg08257009 | 14 | 0.01006704 | 0.664756583 |
| -0.2422645 | cg19849728 | 4  | 0.00011804 | 0.280980999 |
| -0.1616792 | cg00362657 | 21 | 0.01823804 | 0.591932784 |
| -0.1388252 | cg01937780 | 5  | 0.0133049  | 0.730866082 |
| -0.120932  | cg27661394 | 4  | 0.02838377 | 0.572329819 |
| -0.1334308 | cg00033666 | 15 | 0.00052606 | 0.822921899 |
| -0.1797014 | cg22971216 | 2  | 0.01256039 | 0.5940619   |
| -0.1822612 | cg18609078 | 4  | 0.00716572 | 0.840966905 |
| -0.1665798 | cg20608895 | 13 | 0.04769718 | 0.62640909  |
| -0.1434352 | cg13842240 | 4  | 0.01263836 | 0.713842415 |
| -0.150074  | cg00252472 | 6  | 0.02802739 | 0.444492786 |
| -0.1008417 | cg07007382 | 6  | 0.00106491 | 0.384665127 |
| -0.1482912 | cg07231045 | 8  | 0.01866174 | 0.873191922 |
| -0.2150693 | cg10332116 | 16 | 0.00212384 | 0.405895177 |
| -0.1579633 | cg01164574 | 21 | 0.00181737 | 0.456091482 |
| -0.1522657 | cg02235918 | 6  | 0.03765185 | 0.728659326 |
| -0.1077813 | cg10780778 | 6  | 0.02754105 | 0.619163196 |
| -0.2000341 | cg03411579 | 12 | 0.00791855 | 0.495721097 |
| -0.1207431 | cg12818596 | 14 | 0.00832634 | 0.550921543 |
| -0.1075617 | cg25430838 | 10 | 0.01917366 | 0.772440101 |

|            |            |    |            |             |
|------------|------------|----|------------|-------------|
| -0.1612621 | cg16723381 | 2  | 0.00531654 | 0.515243679 |
| -0.1071442 | cg02655361 | 3  | 0.00544497 | 0.739855405 |
| -0.1513255 | cg01994190 | 2  | 0.00132032 | 0.474799719 |
| -0.1955409 | cg02775243 | 10 | 0.04195508 | 0.693203899 |
| -0.1231762 | cg25928986 | 7  | 0.03043918 | 0.62201382  |
| -0.1063772 | cg26404226 | 10 | 0.00092789 | 0.713949211 |
| -0.1051295 | cg08490356 | 8  | 0.00035334 | 0.73482084  |
| -0.2363103 | cg26962618 | 15 | 0.00107722 | 0.727632424 |
| -0.1861564 | cg07866909 | 2  | 0.00917449 | 0.667003533 |
| -0.1811763 | cg10400081 | 11 | 0.03890654 | 0.415421594 |
| -0.1804331 | cg22929787 | 5  | 0.00577243 | 0.424769529 |
| -0.1737037 | cg25104234 | 2  | 0.00706344 | 0.512454249 |
| -0.1725684 | cg25320388 | 11 | 0.02075286 | 0.594790219 |
| -0.1510997 | cg11997536 | 19 | 0.00068835 | 0.43102158  |
| -0.135312  | cg17023122 | 1  | 0.01265481 | 0.779010976 |
| -0.1321905 | cg24954967 | 3  | 0.03028382 | 0.84154965  |
| -0.1063385 | cg16110704 | 1  | 0.00041135 | 0.460784576 |
| -0.1043181 | cg22254983 | 8  | 0.00110317 | 0.37026173  |
| -0.1449287 | cg01664382 | 6  | 0.00835905 | 0.616391607 |
| -0.1353673 | cg24114813 | 5  | 0.00683878 | 0.793454363 |
| -0.1298971 | cg03741862 | 17 | 0.00105005 | 0.333593344 |
| -0.1161966 | cg05464506 | 2  | 0.04506986 | 0.585330485 |
| -0.1887555 | cg08015107 | 11 | 0.01845618 | 0.566399033 |
| -0.1211295 | cg15967278 | 8  | 0.01179822 | 0.70617133  |
| -0.1173639 | cg19169932 | 15 | 0.00467329 | 0.815430937 |
| -0.1806794 | cg11553311 | 5  | 0.01646757 | 0.599288139 |
| -0.1352304 | cg09476073 | 11 | 0.0056951  | 0.564845794 |
| -0.1328947 | cg01432692 | 1  | 0.00860591 | 0.845239103 |
| -0.1670857 | cg07989851 | 15 | 0.01904314 | 0.743636949 |
| -0.1139463 | cg14189441 | 10 | 0.00643938 | 0.736212814 |
| -0.1329845 | cg18765405 | 5  | 0.00548917 | 0.706278654 |
| -0.1202554 | cg05829375 | 16 | 0.00331688 | 0.5192861   |
| -0.2322595 | cg03292222 | 5  | 0.00675274 | 0.469803649 |
| -0.1608901 | cg06961237 | 14 | 0.0051958  | 0.684486376 |
| -0.1105555 | cg09636245 | 11 | 0.01933403 | 0.559877373 |
| -0.2181517 | cg04139043 | 1  | 0.01554632 | 0.615293112 |
| -0.1301307 | cg21834679 | 15 | 0.0018887  | 0.781600661 |
| -0.1147007 | cg12801030 | 1  | 0.01006704 | 0.670136803 |
| -0.1060875 | cg02601475 | 5  | 0.03585549 | 0.698161306 |
| -0.1213314 | cg04819760 | 10 | 0.00303946 | 0.384081802 |
| -0.2750338 | cg20889322 | 11 | 0.00097048 | 0.468637187 |
| -0.2063226 | cg26407841 | 7  | 0.04086775 | 0.526530978 |
| -0.1584608 | cg04064998 | 11 | 0.04017205 | 0.412087784 |
| -0.1575803 | cg16506426 | 5  | 0.03578681 | 0.783120432 |
| -0.153341  | cg03163525 | 10 | 0.02590705 | 0.654127785 |
| -0.1460546 | cg04035553 | 8  | 0.01190613 | 0.450465179 |

|            |            |    |            |             |
|------------|------------|----|------------|-------------|
| -0.1312826 | cg14272084 | 14 | 0.00850796 | 0.555678953 |
| -0.1241746 | cg01384319 | 2  | 0.00014848 | 0.763681834 |
| -0.1156766 | cg02730156 | 21 | 0.00118022 | 0.426684115 |
| -0.1728422 | cg13207733 | 7  | 0.00200949 | 0.564648248 |
| -0.157761  | cg03232342 | 19 | 0.00272425 | 0.445930938 |
| -0.1015941 | cg17411016 | 2  | 0.00329202 | 0.418271114 |
| -0.1006872 | cg16550264 | 12 | 0.00120398 | 0.556052401 |
| -0.1413988 | cg22488750 | 1  | 0.00510353 | 0.451007955 |
| -0.2086837 | cg19699682 | 3  | 0.03851653 | 0.736980446 |
| -0.1619202 | cg14156905 | 1  | 0.01974934 | 0.744880211 |
| -0.2310693 | cg26930006 | 14 | 0.00067911 | 0.393027279 |
| -0.2243874 | cg27449200 | 15 | 0.0104443  | 0.588280956 |
| -0.1872826 | cg10377510 | 1  | 0.02573317 | 0.496232203 |
| -0.1795185 | cg18436984 | 7  | 0.03729156 | 0.680834243 |
| -0.1736071 | cg06775939 | 14 | 0.00150509 | 0.452195879 |
| -0.166147  | cg02148612 | 1  | 0.00086569 | 0.555070257 |
| -0.1554533 | cg20814718 | 8  | 0.00020658 | 0.583827869 |
| -0.1540292 | cg24292665 | 11 | 0.00052359 | 0.435377373 |
| -0.1505493 | cg21752469 | 8  | 0.00487563 | 0.346582461 |
| -0.1455583 | cg19266329 | 1  | 0.00641892 | 0.543135729 |
| -0.1403042 | cg14214856 | 10 | 0.00084012 | 0.457418388 |
| -0.1307297 | cg23221603 | 2  | 0.00378163 | 0.713355545 |
| -0.121618  | cg11551296 | 20 | 0.00312917 | 0.370645042 |
| -0.1207552 | cg07271394 | 16 | 0.00231086 | 0.523571659 |
| -0.1152412 | cg12837463 | 7  | 0.00964235 | 0.705654494 |
| -0.1114869 | cg05979766 | 5  | 0.00823662 | 0.32159576  |
| -0.1094145 | cg06169746 | 3  | 0.00468127 | 0.749176934 |
| -0.1067868 | cg05389236 | 6  | 0.01024106 | 0.670961343 |
| -0.1062242 | cg14387626 | 14 | 0.00083008 | 0.596107561 |
| -0.1058365 | cg25028404 | 1  | 0.0050042  | 0.670395759 |
| -0.1047885 | cg11781335 | 10 | 0.00123646 | 0.703245494 |
| -0.1032101 | cg20052760 | 6  | 0.00310189 | 0.492101361 |
| -0.1025067 | cg01558931 | 5  | 0.0221256  | 0.444238523 |
| -0.1024447 | cg13716585 | 14 | 0.02272604 | 0.708629155 |
| -0.2069409 | cg00335219 | 16 | 0.00168732 | 0.565773276 |
| -0.1245558 | cg11564601 | 22 | 0.02582472 | 0.411558273 |
| -0.1004168 | cg23998071 | 7  | 0.00219305 | 0.440290717 |
| -0.1273786 | cg10943263 | 6  | 0.01699969 | 0.34842063  |
| -0.1199519 | cg19445758 | 6  | 0.02769821 | 0.602042092 |
| -0.1159592 | cg25428740 | 2  | 0.00115296 | 0.42652074  |
| -0.1482438 | cg07092896 | 2  | 0.00107722 | 0.623560541 |
| -0.1289148 | cg19802929 | 14 | 0.01958426 | 0.705696073 |
| -0.1171453 | cg00034336 | 2  | 0.00576223 | 0.646341237 |
| -0.1083161 | cg05132925 | 1  | 0.00448569 | 0.636633458 |
| -0.1374359 | cg06609094 | 4  | 0.01021099 | 0.414101627 |
| -0.1244451 | cg10511890 | 11 | 0.00370842 | 0.723317195 |



|            |            |    |            |             |
|------------|------------|----|------------|-------------|
| -0.1228208 | cg19616339 | 2  | 0.01256487 | 0.669838915 |
| -0.1380962 | cg26671477 | 1  | 0.03974151 | 0.826284346 |
| -0.1346074 | cg15514380 | 21 | 0.00620584 | 0.607303857 |
| -0.1796597 | cg02142926 | 6  | 0.02331332 | 0.504960149 |
| -0.1163176 | cg03453870 | 15 | 0.00618145 | 0.806391209 |
| -0.2231    | cg09120877 | 1  | 0.00365944 | 0.558064011 |
| -0.1327303 | cg16945415 | 3  | 0.0079701  | 0.58587774  |
| -0.1302976 | cg26494138 | 2  | 0.00673317 | 0.711035423 |
| -0.1044421 | cg13421612 | 4  | 0.01367759 | 0.565867533 |
| -0.1938665 | cg16152753 | 10 | 0.03113458 | 0.593201998 |
| -0.1759161 | cg01903799 | 4  | 0.00586054 | 0.685191978 |
| -0.1539157 | cg17779002 | 8  | 0.01640221 | 0.64840502  |
| -0.2591062 | cg26220594 | 1  | 0.01116883 | 0.403171799 |
| -0.1241306 | cg14580747 | 3  | 0.02558791 | 0.465558792 |
| -0.1317169 | cg03614721 | 5  | 0.00085844 | 0.44802308  |
| -0.1663331 | cg07318609 | 10 | 0.00511987 | 0.577693716 |
| -0.1389826 | cg15025379 | 11 | 0.00229562 | 0.548656335 |
| -0.1272637 | cg02388378 | 16 | 0.00011804 | 0.746062303 |
| -0.1877226 | cg16417409 | 11 | 0.00515631 | 0.43758235  |
| -0.2269785 | cg06647928 | 5  | 0.00912353 | 0.840008597 |
| -0.1072656 | cg22567585 | 15 | 0.00120283 | 0.429141533 |
| -0.14983   | cg14144025 | 4  | 0.00014355 | 0.424158225 |
| -0.1848376 | cg18100045 | 3  | 0.00944828 | 0.49347052  |
| -0.1046122 | cg18408273 | 4  | 0.00576779 | 0.633172505 |
| -0.121688  | cg13057506 | 15 | 0.0013731  | 0.563450542 |
| -0.1196237 | cg01961105 | 16 | 0.00055533 | 0.7775421   |
| -0.1017332 | cg25132782 | 15 | 0.00455418 | 0.752575097 |
| -0.1072858 | cg25255850 | 17 | 0.00299875 | 0.506264928 |
| -0.1422138 | cg00572089 | 12 | 0.00031942 | 0.270649377 |
| -0.2396091 | cg09275408 | 10 | 0.00647789 | 0.785794    |
| -0.1038363 | cg00316839 | 4  | 0.02608857 | 0.588330693 |
| -0.1101374 | cg19186056 | 11 | 0.01590107 | 0.797668133 |
| -0.1197009 | cg23361127 | 5  | 0.01031233 | 0.877944751 |
| -0.1027746 | cg22229039 | 1  | 0.01775302 | 0.793401411 |
| -0.1076268 | cg04783450 | 6  | 0.00766333 | 0.656676388 |
| -0.2537097 | cg23391288 | 13 | 0.01220112 | 0.8549298   |
| -0.1249126 | cg10881749 | 1  | 0.01379616 | 0.650528391 |
| -0.146618  | cg24486958 | 1  | 0.00772657 | 0.527149679 |
| -0.109538  | cg07485423 | 4  | 0.00701258 | 0.415919784 |
| -0.1158811 | cg07178994 | 8  | 0.00085003 | 0.638723388 |
| -0.1143717 | cg12708109 | 1  | 0.00244384 | 0.557615017 |
| -0.1091263 | cg12436772 | 2  | 0.00224465 | 0.793496894 |
| -0.1111676 | cg26196626 | 8  | 0.00147715 | 0.439201749 |
| -0.3209948 | cg14579864 | 9  | 0.01594422 | 0.578377119 |
| -0.3162711 | cg05611723 | 2  | 0.00721619 | 0.537738708 |
| -0.3065836 | cg03165356 | 2  | 0.02799737 | 0.479017587 |

|            |            |    |            |             |
|------------|------------|----|------------|-------------|
| -0.30148   | cg10587854 | 3  | 0.01366696 | 0.448390372 |
| -0.30044   | cg06269928 | 1  | 0.00298996 | 0.696984934 |
| -0.2994582 | cg06829584 | 10 | 0.01113697 | 0.830853168 |
| -0.2982094 | cg16622061 | 16 | 0.01087022 | 0.688064981 |
| -0.2946684 | cg14217495 | 1  | 0.01033173 | 0.608328303 |
| -0.2863929 | cg05267204 | 2  | 0.00185899 | 0.47038887  |
| -0.2835076 | cg22006060 | 4  | 0.00019359 | 0.30184909  |
| -0.2826236 | cg10348234 | 14 | 2.40E-05   | 0.324893076 |
| -0.2811257 | cg26448394 | 4  | 0.00686775 | 0.487783533 |
| -0.2804924 | cg05970116 | 10 | 0.00859727 | 0.65589803  |
| -0.2787272 | cg11942594 | 3  | 0.01234595 | 0.822307472 |
| -0.2746591 | cg26954951 | 6  | 0.00257438 | 0.6772906   |
| -0.2710816 | cg18926409 | 15 | 0.01087022 | 0.74199343  |
| -0.2697641 | cg17083685 | 13 | 0.04252603 | 0.577857884 |
| -0.2613402 | cg13873324 | 1  | 0.00251394 | 0.478521695 |
| -0.2597041 | cg02914097 | 3  | 0.00189897 | 0.423358272 |
| -0.2590373 | cg08454015 | 1  | 0.02340941 | 0.754003671 |
| -0.25866   | cg01495299 | 8  | 0.01884548 | 0.763127524 |
| -0.2585956 | cg06287548 | 21 | 0.01163152 | 0.640572369 |
| -0.2547222 | cg17126947 | 4  | 0.00679871 | 0.787619963 |
| -0.2537959 | cg17494199 | 13 | 0.01486595 | 0.795997594 |
| -0.2529417 | cg23340350 | 5  | 0.00166797 | 0.501873658 |
| -0.2515257 | cg21230425 | 7  | 0.00412729 | 0.847420301 |
| -0.2515154 | cg12091936 | 11 | 0.02944384 | 0.564795707 |
| -0.2513517 | cg09708616 | 6  | 0.00111365 | 0.407533259 |
| -0.2511559 | cg12254430 | 3  | 0.00321453 | 0.685063234 |
| -0.2507311 | cg18257574 | 2  | 0.00080356 | 0.379783994 |
| -0.2501021 | cg09517106 | 1  | 0.00724746 | 0.458675792 |
| -0.2497432 | cg04706962 | 8  | 0.00050117 | 0.833105814 |
| -0.24903   | cg00050294 | 1  | 0.00521395 | 0.802488446 |
| -0.2480744 | cg01423916 | 11 | 0.00839661 | 0.745473265 |
| -0.2480317 | cg05782888 | 8  | 0.00577668 | 0.649836288 |
| -0.2476264 | cg16312968 | 6  | 0.00233724 | 0.455292744 |
| -0.2471732 | cg02063817 | 7  | 0.00835634 | 0.750035375 |
| -0.246021  | cg04932082 | 6  | 0.01030523 | 0.729563719 |
| -0.2443696 | cg26562263 | 19 | 0.01778683 | 0.744018272 |
| -0.2437146 | cg11671598 | 4  | 0.00179097 | 0.622702395 |
| -0.2428411 | cg14553705 | 5  | 0.03150625 | 0.649732744 |
| -0.2390792 | cg13427361 | 4  | 0.03938661 | 0.647684069 |
| -0.2389516 | cg13067635 | 1  | 0.00333877 | 0.746078829 |
| -0.2384856 | cg00709966 | 7  | 0.02621259 | 0.813405484 |
| -0.2376215 | cg11746996 | 13 | 0.00117148 | 0.606228987 |
| -0.2370552 | cg26299756 | 6  | 0.00085862 | 0.438676573 |
| -0.2370533 | cg02380802 | 16 | 0.0266115  | 0.57571968  |
| -0.2365611 | cg05219445 | 6  | 0.00350029 | 0.556876726 |
| -0.23601   | cg27409484 | 6  | 0.00348727 | 0.407660259 |

|            |            |    |            |             |
|------------|------------|----|------------|-------------|
| -0.235369  | cg00150785 | 20 | 0.00377799 | 0.569538336 |
| -0.2347099 | cg22013019 | 6  | 0.00287923 | 0.69302697  |
| -0.2342773 | cg07904073 | 10 | 0.01766792 | 0.627724433 |
| -0.2329642 | cg13401079 | 4  | 0.00066183 | 0.482448091 |
| -0.2327892 | cg04781339 | 21 | 0.00670431 | 0.522145284 |
| -0.2324157 | cg13432945 | 1  | 0.00101804 | 0.668404721 |
| -0.2321458 | cg13340765 | 8  | 0.01503288 | 0.763777291 |
| -0.2321069 | cg10148932 | 19 | 0.04864276 | 0.735974533 |
| -0.2320479 | cg07095347 | 6  | 0.00414013 | 0.486195747 |
| -0.2314338 | cg08858426 | 17 | 0.01615052 | 0.727411257 |
| -0.2311733 | cg06946797 | 16 | 0.00082465 | 0.44710634  |
| -0.2307414 | cg12109797 | 8  | 0.00582049 | 0.504343674 |
| -0.2304197 | cg01702055 | 6  | 0.02991677 | 0.589531672 |
| -0.2290582 | cg05191655 | 4  | 0.00677986 | 0.505545349 |
| -0.2282834 | cg06388350 | 4  | 0.00249564 | 0.347960153 |
| -0.2277129 | cg15476994 | 6  | 0.01087629 | 0.753491019 |
| -0.2276975 | cg10149296 | 2  | 0.02079082 | 0.757656194 |
| -0.22624   | cg05471881 | 13 | 5.88E-05   | 0.668557577 |
| -0.2262306 | cg18132787 | 1  | 0.00243458 | 0.745698027 |
| -0.2261886 | cg22786667 | 7  | 0.04052499 | 0.804163659 |
| -0.2259735 | cg23170646 | 4  | 0.00213373 | 0.496441721 |
| -0.2250372 | cg01240795 | 5  | 0.00460099 | 0.7591862   |
| -0.2248321 | cg15981982 | 2  | 0.01400471 | 0.75691098  |
| -0.2245568 | cg17477578 | 8  | 0.04538013 | 0.538265398 |
| -0.2243888 | cg12457659 | 21 | 0.00384317 | 0.547439582 |
| -0.2239311 | cg10193711 | 14 | 0.03241654 | 0.54160146  |
| -0.2239069 | cg19479609 | 2  | 0.00067068 | 0.498256231 |
| -0.2227791 | cg25113089 | 5  | 0.00200949 | 0.480360022 |
| -0.2227139 | cg24699005 | 19 | 0.0224495  | 0.663266886 |
| -0.2225869 | cg01816783 | 11 | 0.00019986 | 0.466011444 |
| -0.2221658 | cg13402298 | 1  | 0.00084375 | 0.884397479 |
| -0.2221304 | cg01227239 | 4  | 0.01072617 | 0.481409291 |
| -0.2220805 | cg04526361 | 7  | 0.00022415 | 0.550116144 |
| -0.2218316 | cg09571950 | 3  | 0.02300033 | 0.787425868 |
| -0.2207427 | cg25314284 | 11 | 0.00161252 | 0.513226639 |
| -0.2198807 | cg23614811 | 17 | 0.00934349 | 0.413817296 |
| -0.2198306 | cg14212012 | 3  | 0.00066484 | 0.315892626 |
| -0.2193851 | cg10703884 | 3  | 0.01040341 | 0.43733077  |
| -0.2192997 | cg02621151 | 5  | 0.01224334 | 0.444320395 |
| -0.2191831 | cg20617957 | 13 | 0.00152272 | 0.437604991 |
| -0.2190432 | cg21949194 | 2  | 0.0057274  | 0.74374181  |
| -0.2189212 | cg20956390 | 14 | 0.01037261 | 0.472499116 |
| -0.2185376 | cg10233830 | 12 | 0.01727782 | 0.399674506 |
| -0.2185354 | cg03618113 | 12 | 0.01264149 | 0.685304189 |
| -0.2182894 | cg00460983 | 10 | 0.00183714 | 0.791016919 |
| -0.2181012 | cg07417348 | 12 | 3.77E-05   | 0.323556239 |

|            |            |    |            |             |
|------------|------------|----|------------|-------------|
| -0.2179508 | cg25747670 | 1  | 0.00450651 | 0.683009436 |
| -0.2178896 | cg18334977 | 3  | 0.00148262 | 0.745621877 |
| -0.2177989 | cg19867579 | 2  | 0.00860922 | 0.519970025 |
| -0.217753  | cg06934774 | 7  | 0.04789124 | 0.825857114 |
| -0.2177217 | cg16933229 | 4  | 0.00822547 | 0.489615296 |
| -0.2175446 | cg14653136 | 1  | 0.00038287 | 0.431657175 |
| -0.2171206 | cg23464619 | 13 | 0.04450498 | 0.610287994 |
| -0.216853  | cg16440978 | 14 | 0.0065323  | 0.351965479 |
| -0.2163891 | cg23618477 | 6  | 0.00868275 | 0.675360518 |
| -0.2161298 | cg00960147 | 1  | 0.00558925 | 0.460695007 |
| -0.2158119 | cg15717275 | 22 | 0.00237676 | 0.61703302  |
| -0.2151124 | cg07970146 | 2  | 0.00906489 | 0.704750238 |
| -0.2151096 | cg21348406 | 17 | 0.00513896 | 0.707291024 |
| -0.214972  | cg01510278 | 16 | 0.01480995 | 0.43357764  |
| -0.2138989 | cg27621721 | 3  | 0.01406057 | 0.515855805 |
| -0.2138154 | cg13857933 | 1  | 0.00107112 | 0.424579298 |
| -0.212388  | cg14947010 | 16 | 0.00984979 | 0.612432032 |
| -0.2123866 | cg05940672 | 2  | 0.00935502 | 0.651943098 |
| -0.2122121 | cg11366886 | 20 | 0.01646259 | 0.773706781 |
| -0.2121489 | cg25537245 | 17 | 0.00118984 | 0.54406758  |
| -0.21191   | cg06926146 | 1  | 0.00223398 | 0.647273562 |
| -0.2118709 | cg04071967 | 17 | 0.00162897 | 0.549767798 |
| -0.211376  | cg07980854 | 20 | 0.00335356 | 0.509666515 |
| -0.2110328 | cg26906217 | 11 | 0.01121603 | 0.61179574  |
| -0.210785  | cg13052638 | 1  | 0.00275215 | 0.594524926 |
| -0.2106571 | cg20972199 | 11 | 0.00580764 | 0.641925597 |
| -0.210522  | cg21995261 | 11 | 0.00039343 | 0.588087036 |
| -0.2102535 | cg18489994 | 4  | 0.00444573 | 0.387724018 |
| -0.2102306 | cg27511894 | 1  | 0.00055176 | 0.616660045 |
| -0.2101569 | cg09662304 | 13 | 0.00366827 | 0.661593278 |
| -0.209603  | cg05492170 | 4  | 0.00026479 | 0.371597019 |
| -0.2095611 | cg22869030 | 4  | 0.00669998 | 0.474533011 |
| -0.2092582 | cg13905238 | 3  | 0.00201683 | 0.531682713 |
| -0.2087219 | cg01905967 | 5  | 0.00643076 | 0.540869927 |
| -0.2081419 | cg23408558 | 5  | 0.0015281  | 0.418369582 |
| -0.2080768 | cg00462107 | 5  | 0.00142394 | 0.52789087  |
| -0.2080265 | cg10784519 | 6  | 0.00080657 | 0.418882894 |
| -0.2071768 | cg07264203 | 3  | 0.01926853 | 0.813284918 |
| -0.2068587 | cg06635722 | 4  | 0.00243085 | 0.642703195 |
| -0.2061899 | cg01076704 | 20 | 0.01350385 | 0.715641261 |
| -0.206023  | cg03252770 | 4  | 0.00254161 | 0.462106054 |
| -0.2060165 | cg21301805 | 1  | 0.00026475 | 0.438838531 |
| -0.2058652 | cg00587301 | 6  | 0.02122996 | 0.691068954 |
| -0.2058559 | cg02320543 | 14 | 0.00245757 | 0.449672158 |
| -0.205266  | cg19748027 | 5  | 0.00286375 | 0.755638865 |
| -0.205146  | cg04399631 | 3  | 0.01422574 | 0.680750854 |

|            |            |    |            |             |
|------------|------------|----|------------|-------------|
| -0.2044946 | cg00098029 | 4  | 0.00724176 | 0.602614771 |
| -0.204272  | cg02924234 | 2  | 0.02036171 | 0.683896846 |
| -0.2040329 | cg18728780 | 14 | 0.00282739 | 0.564090723 |
| -0.2040161 | cg14686297 | 22 | 0.01852374 | 0.633815107 |
| -0.203002  | cg11670789 | 15 | 0.00386483 | 0.70674329  |
| -0.2026483 | cg21172011 | 21 | 0.00900506 | 0.83983943  |
| -0.2025272 | cg00951857 | 6  | 0.00286981 | 0.649781683 |
| -0.2023811 | cg01721569 | 2  | 6.85E-05   | 0.701035434 |
| -0.2022174 | cg16564033 | 21 | 0.00715384 | 0.736306346 |
| -0.2021759 | cg13306522 | 5  | 0.01057537 | 0.611878508 |
| -0.202081  | cg04111102 | 1  | 0.00231178 | 0.692398881 |
| -0.2019142 | cg21514612 | 4  | 0.01744469 | 0.774272187 |
| -0.2016062 | cg10809166 | 12 | 0.00237816 | 0.679861584 |
| -0.2012947 | cg04998379 | 4  | 0.01412982 | 0.714393978 |
| -0.2012436 | cg24623760 | 12 | 0.04099285 | 0.835893083 |
| -0.2010659 | cg03593014 | 10 | 0.01096723 | 0.562301033 |
| -0.2007529 | cg17479943 | 1  | 0.00262635 | 0.687188015 |
| -0.2002866 | cg03214130 | 7  | 0.00086154 | 0.441467143 |
| -0.20017   | cg08381504 | 3  | 0.0180241  | 0.797982118 |
| -0.1996614 | cg06422883 | 5  | 0.00548391 | 0.631013085 |
| -0.1996561 | cg10281509 | 2  | 0.00102711 | 0.59007475  |
| -0.1995335 | cg06322557 | 3  | 0.00523533 | 0.689122038 |
| -0.1986989 | cg14358570 | 14 | 0.0003098  | 0.566960157 |
| -0.1986539 | cg02608831 | 8  | 0.00637775 | 0.681173467 |
| -0.1982674 | cg13106758 | 15 | 0.02188832 | 0.587773914 |
| -0.1980977 | cg10440877 | 2  | 0.00968932 | 0.702329903 |
| -0.1979962 | cg17472111 | 11 | 7.39E-05   | 0.359728737 |
| -0.197474  | cg25827670 | 17 | 0.00391195 | 0.587203553 |
| -0.1971128 | cg06215984 | 1  | 0.00405824 | 0.482828465 |
| -0.1970145 | cg09264231 | 1  | 0.01667266 | 0.636491921 |
| -0.1969182 | cg23090653 | 6  | 0.00813471 | 0.594660951 |
| -0.1968702 | cg02063759 | 1  | 0.02637909 | 0.62160327  |
| -0.1966582 | cg00602295 | 16 | 0.00681997 | 0.479248429 |
| -0.196623  | cg26304948 | 2  | 0.00172643 | 0.480516078 |
| -0.1965595 | cg27302301 | 7  | 0.01014277 | 0.670469856 |
| -0.1964637 | cg06361606 | 1  | 0.00106437 | 0.355579328 |
| -0.1962889 | cg00344422 | 13 | 0.02191322 | 0.671854168 |
| -0.1962102 | cg03185794 | 13 | 0.00197293 | 0.727647497 |
| -0.1961414 | cg15030449 | 1  | 0.00083087 | 0.505026726 |
| -0.1961196 | cg26570165 | 1  | 0.00199367 | 0.607989934 |
| -0.1957148 | cg24406240 | 11 | 0.01268746 | 0.623099929 |
| -0.1955377 | cg10466548 | 16 | 0.00035088 | 0.418022417 |
| -0.1954566 | cg13410764 | 9  | 0.00796999 | 0.551724938 |
| -0.1953964 | cg05317600 | 13 | 0.00419732 | 0.811057044 |
| -0.1953218 | cg01037082 | 22 | 0.0132361  | 0.746203462 |
| -0.1953061 | cg01195545 | 7  | 0.01904047 | 0.676964858 |

|            |            |    |            |             |
|------------|------------|----|------------|-------------|
| -0.1949816 | cg16069079 | 15 | 0.0385962  | 0.744066907 |
| -0.1947065 | cg05995607 | 11 | 0.00016884 | 0.375493866 |
| -0.194104  | cg08230177 | 5  | 0.01770208 | 0.796339064 |
| -0.1940254 | cg09455881 | 3  | 0.01298157 | 0.704572702 |
| -0.1940193 | cg22251569 | 8  | 0.00795469 | 0.620884508 |
| -0.1938149 | cg05935904 | 6  | 0.00220434 | 0.550962254 |
| -0.1938079 | cg17140992 | 15 | 0.00101034 | 0.629050764 |
| -0.193708  | cg00092400 | 12 | 0.04435613 | 0.731381023 |
| -0.1935522 | cg22642485 | 5  | 0.00300732 | 0.530584212 |
| -0.1935295 | cg25831439 | 2  | 0.01472825 | 0.632894977 |
| -0.1935218 | cg21833076 | 11 | 0.00106045 | 0.581684883 |
| -0.1934179 | cg03663556 | 7  | 0.00303443 | 0.406359297 |
| -0.1933517 | cg14855679 | 4  | 0.00076863 | 0.62073203  |
| -0.1928629 | cg10714509 | 1  | 0.00019986 | 0.610345573 |
| -0.1926174 | cg26394636 | 10 | 0.01795642 | 0.815701093 |
| -0.1925811 | cg14675881 | 2  | 0.00241653 | 0.775990756 |
| -0.1924712 | cg11383134 | 6  | 0.01187492 | 0.850819554 |
| -0.1921482 | cg03127349 | 10 | 0.00072247 | 0.446354081 |
| -0.1919708 | cg25044514 | 2  | 0.00201017 | 0.381835624 |
| -0.1916855 | cg04230891 | 6  | 9.93E-05   | 0.458019762 |
| -0.1913227 | cg12659883 | 1  | 0.01374378 | 0.630970851 |
| -0.1911696 | cg00172872 | 12 | 0.00856018 | 0.837238553 |
| -0.190904  | cg15331705 | 8  | 0.0032554  | 0.44675565  |
| -0.190252  | cg14129735 | 6  | 0.0132069  | 0.722643612 |
| -0.1901049 | cg14845812 | 2  | 0.01604627 | 0.836515334 |
| -0.1900228 | cg07356549 | 1  | 0.03115791 | 0.497370335 |
| -0.1898917 | cg05662444 | 5  | 0.00292301 | 0.657269444 |
| -0.1898165 | cg08894020 | 5  | 0.00403946 | 0.657992691 |
| -0.1893538 | cg08981669 | 7  | 0.00172155 | 0.747216282 |
| -0.1892367 | cg09553242 | 5  | 0.01770202 | 0.774471367 |
| -0.1891234 | cg02373784 | 4  | 0.01010697 | 0.731256965 |
| -0.1886406 | cg01117339 | 11 | 0.01405587 | 0.700858783 |
| -0.1885073 | cg21393051 | 1  | 0.000584   | 0.515428049 |
| -0.1881503 | cg10134799 | 6  | 0.00371521 | 0.634589361 |
| -0.1878789 | cg05979457 | 8  | 0.01065241 | 0.435795329 |
| -0.1876102 | cg12790424 | 14 | 0.00418328 | 0.682414337 |
| -0.187512  | cg09889228 | 16 | 0.0030301  | 0.637427415 |
| -0.1874399 | cg10601624 | 12 | 0.00139867 | 0.549069685 |
| -0.1874309 | cg05068848 | 4  | 0.01053858 | 0.828115534 |
| -0.1869666 | cg04510459 | 1  | 0.00359802 | 0.612178043 |
| -0.1869655 | cg07807757 | 7  | 0.0133422  | 0.694520236 |
| -0.1868727 | cg19485103 | 6  | 0.00088822 | 0.506312192 |
| -0.1868451 | cg05234552 | 6  | 0.00104839 | 0.495582517 |
| -0.1867493 | cg04405704 | 6  | 0.00122333 | 0.547717794 |
| -0.1863973 | cg05933510 | 1  | 0.02657868 | 0.797803441 |
| -0.186361  | cg26314722 | 1  | 0.01484693 | 0.749262815 |

|            |            |    |            |             |
|------------|------------|----|------------|-------------|
| -0.1862758 | cg10129391 | 4  | 0.0019814  | 0.55006585  |
| -0.1862369 | cg14671011 | 5  | 0.007971   | 0.743220457 |
| -0.1861367 | cg24674269 | 13 | 0.03130986 | 0.770065979 |
| -0.1859475 | cg07453778 | 6  | 0.00207283 | 0.547231756 |
| -0.1858993 | cg01020413 | 2  | 0.00106209 | 0.744391481 |
| -0.1858526 | cg26325867 | 6  | 0.00109389 | 0.492260639 |
| -0.1857725 | cg01250603 | 10 | 0.00190885 | 0.800761799 |
| -0.1857512 | cg15457481 | 4  | 0.00220399 | 0.738841241 |
| -0.1856746 | cg16667631 | 5  | 0.00831048 | 0.825817159 |
| -0.1855887 | cg21399203 | 4  | 0.01524277 | 0.622940479 |
| -0.1855    | cg17666418 | 6  | 0.02166581 | 0.698428801 |
| -0.1853961 | cg15540602 | 14 | 0.0009114  | 0.63491155  |
| -0.1853577 | cg07243202 | 8  | 0.00212896 | 0.52240955  |
| -0.1852365 | cg06982190 | 7  | 0.00811329 | 0.65493981  |
| -0.1852234 | cg22540135 | 19 | 0.02279713 | 0.690025914 |
| -0.1848801 | cg13823964 | 9  | 0.00644728 | 0.514948897 |
| -0.1844891 | cg08064488 | 21 | 0.00491316 | 0.763813122 |
| -0.1841789 | cg05403316 | 2  | 0.00271339 | 0.705444402 |
| -0.1839526 | cg15893295 | 6  | 0.00766333 | 0.702728038 |
| -0.1839368 | cg21814178 | 12 | 0.00042688 | 0.462752185 |
| -0.1837588 | cg00100420 | 4  | 0.00143321 | 0.329662669 |
| -0.1837428 | cg24941342 | 11 | 0.00166356 | 0.815899929 |
| -0.1833732 | cg11241663 | 2  | 0.00159397 | 0.597310625 |
| -0.1831832 | cg00657780 | 16 | 0.00869957 | 0.700942091 |
| -0.1829892 | cg16652303 | 11 | 0.0030666  | 0.618815652 |
| -0.1829099 | cg06685282 | 3  | 0.00224433 | 0.505682842 |
| -0.1824996 | cg23229770 | 2  | 0.01280327 | 0.663157429 |
| -0.1820227 | cg24549912 | 5  | 0.00241243 | 0.474181451 |
| -0.1819569 | cg18103859 | 14 | 0.00127248 | 0.695739144 |
| -0.1815559 | cg14260169 | 10 | 0.00094026 | 0.44063187  |
| -0.1812446 | cg10519417 | 17 | 0.00185821 | 0.683549589 |
| -0.1811531 | cg11465213 | 15 | 0.01165191 | 0.655237771 |
| -0.1811015 | cg24802813 | 7  | 0.00029254 | 0.495516532 |
| -0.1810328 | cg09528494 | 8  | 0.00510406 | 0.549703115 |
| -0.1809482 | cg06857289 | 4  | 9.51E-05   | 0.479850944 |
| -0.1808503 | cg01766850 | 6  | 0.0038716  | 0.574474335 |
| -0.1804757 | cg02849507 | 16 | 0.00851577 | 0.652174766 |
| -0.1804096 | cg04136456 | 1  | 0.00021645 | 0.425323126 |
| -0.180132  | cg06011086 | 8  | 0.00012086 | 0.618294243 |
| -0.1799194 | cg00066854 | 10 | 0.03079464 | 0.844930551 |
| -0.179888  | cg21568661 | 15 | 0.00647228 | 0.491049981 |
| -0.1797155 | cg00387090 | 1  | 0.01526042 | 0.67711856  |
| -0.1796736 | cg07484739 | 2  | 0.00240122 | 0.588579852 |
| -0.1795341 | cg25888386 | 10 | 0.00372642 | 0.77559744  |
| -0.1792277 | cg00778190 | 1  | 0.01051288 | 0.635690782 |
| -0.1792089 | cg00206507 | 6  | 0.00554781 | 0.697134024 |

|            |            |    |            |             |
|------------|------------|----|------------|-------------|
| -0.179186  | cg18526008 | 3  | 0.00443063 | 0.511024812 |
| -0.1791036 | cg09584358 | 17 | 0.01017224 | 0.526046595 |
| -0.1789936 | cg01047631 | 16 | 0.00024559 | 0.66362394  |
| -0.1789913 | cg22293458 | 3  | 0.0017171  | 0.545030293 |
| -0.1787778 | cg03709475 | 5  | 0.0002643  | 0.440429711 |
| -0.1786986 | cg22534374 | 1  | 0.01453201 | 0.654098114 |
| -0.178664  | cg00139681 | 7  | 0.00142273 | 0.518027769 |
| -0.1785584 | cg14241836 | 7  | 0.00555735 | 0.860168199 |
| -0.1785547 | cg02138953 | 10 | 0.00759349 | 0.695649894 |
| -0.1784739 | cg15772157 | 10 | 0.01939503 | 0.759502042 |
| -0.1782082 | cg22812413 | 15 | 0.00351696 | 0.600035913 |
| -0.1781776 | cg01733904 | 13 | 0.00475202 | 0.798203407 |
| -0.1778668 | cg19410609 | 2  | 0.01100568 | 0.863621332 |
| -0.1778278 | cg10097313 | 14 | 0.00296068 | 0.703483347 |
| -0.1777371 | cg27268352 | 10 | 0.00592295 | 0.844275121 |
| -0.1776932 | cg12048965 | 10 | 0.00399227 | 0.792592546 |
| -0.1775172 | cg25668093 | 15 | 0.00468019 | 0.828509353 |
| -0.1774545 | cg16099687 | 12 | 0.01414455 | 0.723125599 |
| -0.1774273 | cg24484352 | 17 | 0.00138064 | 0.762506875 |
| -0.1771711 | cg03475509 | 4  | 0.02104863 | 0.666471839 |
| -0.1769531 | cg06993307 | 16 | 0.00114854 | 0.448857518 |
| -0.1768782 | cg09126279 | 4  | 0.02839145 | 0.73580087  |
| -0.1762765 | cg09247170 | 14 | 0.00021783 | 0.409038331 |
| -0.1761979 | cg12899747 | 3  | 0.00260757 | 0.647278487 |
| -0.1761399 | cg22046201 | 1  | 0.0164125  | 0.618031034 |
| -0.1760841 | cg21241675 | 9  | 0.00414013 | 0.662946509 |
| -0.1760646 | cg24103651 | 10 | 0.02763791 | 0.820964927 |
| -0.1759366 | cg07295362 | 2  | 0.00845771 | 0.685419631 |
| -0.1758399 | cg05168229 | 13 | 0.00023669 | 0.481443223 |
| -0.1757121 | cg12656085 | 2  | 0.01172301 | 0.592203353 |
| -0.1754951 | cg22912834 | 2  | 0.01004799 | 0.838476902 |
| -0.1752885 | cg17573301 | 5  | 0.00692898 | 0.731103948 |
| -0.17493   | cg18388547 | 1  | 0.00015136 | 0.507906559 |
| -0.1748648 | cg12670123 | 10 | 0.00152272 | 0.501993213 |
| -0.1747763 | cg04718050 | 14 | 2.83E-05   | 0.541761846 |
| -0.1747552 | cg26203328 | 15 | 0.00011092 | 0.411396765 |
| -0.1746896 | cg27227317 | 2  | 0.00024261 | 0.569634447 |
| -0.1746837 | cg24178897 | 14 | 0.00560963 | 0.552412153 |
| -0.1746725 | cg08136020 | 6  | 0.01192803 | 0.658741195 |
| -0.1745161 | cg23314893 | 5  | 0.00444599 | 0.579772265 |
| -0.174369  | cg09244312 | 13 | 0.00650363 | 0.721951017 |
| -0.1742596 | cg10893095 | 6  | 0.00092843 | 0.539684445 |
| -0.1742131 | cg15916160 | 16 | 0.01873716 | 0.567500599 |
| -0.1740179 | cg12143499 | 12 | 0.01440148 | 0.710364136 |
| -0.173824  | cg08474859 | 4  | 0.00491976 | 0.542374314 |
| -0.1737952 | cg04446653 | 3  | 0.00061522 | 0.418334715 |



|            |            |    |            |             |
|------------|------------|----|------------|-------------|
| -0.173683  | cg13427748 | 15 | 0.00354887 | 0.562260983 |
| -0.1734872 | cg22122321 | 4  | 0.01128146 | 0.735807899 |
| -0.1733666 | cg17681527 | 7  | 0.00159689 | 0.415204916 |
| -0.1732238 | cg06627087 | 19 | 0.01230854 | 0.85429235  |
| -0.1731964 | cg00344308 | 3  | 0.01393484 | 0.756665008 |
| -0.1731033 | cg21437157 | 8  | 0.00145124 | 0.461665759 |
| -0.1730899 | cg00070383 | 4  | 0.00040104 | 0.679161968 |
| -0.1730712 | cg01832712 | 3  | 0.00106516 | 0.485802851 |
| -0.1730056 | cg18802138 | 16 | 0.00180646 | 0.664533509 |
| -0.1729383 | cg00520406 | 6  | 0.00142627 | 0.772816807 |
| -0.1728537 | cg03796381 | 15 | 0.00746943 | 0.64723921  |
| -0.1727624 | cg18720803 | 4  | 0.00588525 | 0.70148953  |
| -0.1727217 | cg07593977 | 8  | 0.03205023 | 0.745915982 |
| -0.1727032 | cg21308365 | 6  | 0.00506623 | 0.497329981 |
| -0.1726496 | cg13048903 | 13 | 0.00220744 | 0.754318701 |
| -0.1726277 | cg15142335 | 1  | 0.00415967 | 0.784980897 |
| -0.1726118 | cg26856924 | 1  | 0.00655108 | 0.683750647 |
| -0.1726086 | cg24686551 | 3  | 0.0244387  | 0.747248776 |
| -0.1725613 | cg00588198 | 6  | 0.04585657 | 0.712687731 |
| -0.1725557 | cg16097858 | 2  | 0.01192856 | 0.626474319 |
| -0.1724951 | cg26821681 | 8  | 0.0009286  | 0.475354084 |
| -0.1724948 | cg12534147 | 5  | 0.00414112 | 0.501375538 |
| -0.1724553 | cg11857320 | 4  | 0.00156368 | 0.55946438  |
| -0.1723729 | cg02691192 | 17 | 0.00044787 | 0.49801628  |
| -0.1722107 | cg03002688 | 4  | 0.01717418 | 0.669547079 |
| -0.1722066 | cg13777730 | 1  | 0.02379866 | 0.677239192 |
| -0.1721696 | cg04349084 | 8  | 0.00677837 | 0.677044558 |
| -0.172122  | cg03988540 | 4  | 0.00635244 | 0.601970203 |
| -0.1720846 | cg01719405 | 14 | 0.00385276 | 0.62815792  |
| -0.171793  | cg02311193 | 17 | 0.00631737 | 0.6388442   |
| -0.1717221 | cg16783186 | 2  | 0.0057115  | 0.611916965 |
| -0.1716755 | cg20893203 | 6  | 0.0031469  | 0.466628672 |
| -0.1716269 | cg18530568 | 2  | 0.00999619 | 0.713824814 |
| -0.1715832 | cg26780125 | 8  | 0.01499545 | 0.673197442 |
| -0.1715627 | cg14508696 | 15 | 0.0074657  | 0.624617356 |
| -0.171542  | cg16657152 | 8  | 0.00097482 | 0.520386147 |
| -0.171394  | cg20031845 | 7  | 0.0186838  | 0.785588744 |
| -0.1713049 | cg23143090 | 6  | 0.00144184 | 0.58624514  |
| -0.1712802 | cg04166812 | 14 | 0.00014325 | 0.789449991 |
| -0.170952  | cg09140531 | 6  | 0.00060894 | 0.738345326 |
| -0.170884  | cg00184457 | 8  | 0.00691667 | 0.764695279 |
| -0.1708273 | cg06409538 | 11 | 0.0469517  | 0.526805347 |
| -0.1707851 | cg07790170 | 4  | 0.00138064 | 0.350355842 |
| -0.170676  | cg11786870 | 1  | 0.00568209 | 0.763665652 |
| -0.1706574 | cg17418276 | 11 | 0.00233838 | 0.642191851 |
| -0.1706512 | cg19526685 | 8  | 0.00524437 | 0.565199971 |

|            |            |    |            |             |
|------------|------------|----|------------|-------------|
| -0.1706445 | cg10214640 | 16 | 0.01093465 | 0.76099524  |
| -0.1704641 | cg20228636 | 6  | 0.03309942 | 0.775644821 |
| -0.1704256 | cg16534399 | 16 | 0.00123011 | 0.5115293   |
| -0.1701947 | cg01223086 | 15 | 0.00053483 | 0.621771779 |
| -0.1701833 | cg25555753 | 19 | 0.00397895 | 0.606999383 |
| -0.1701466 | cg24939196 | 6  | 0.00034166 | 0.534686224 |
| -0.1699877 | cg16001689 | 6  | 0.00308382 | 0.555309578 |
| -0.1698777 | cg08474826 | 1  | 0.00356152 | 0.755095657 |
| -0.1697773 | cg03503942 | 20 | 0.00543731 | 0.575421753 |
| -0.1696788 | cg01952913 | 8  | 0.0049904  | 0.632607582 |
| -0.1693987 | cg26613811 | 7  | 0.00085169 | 0.512212598 |
| -0.1693613 | cg08939394 | 1  | 0.0007117  | 0.623291217 |
| -0.1693208 | cg09884419 | 15 | 0.00040459 | 0.427679942 |
| -0.1692879 | cg12512771 | 7  | 0.01584418 | 0.736517823 |
| -0.169219  | cg08041448 | 6  | 0.02905867 | 0.640352109 |
| -0.1692178 | cg06223926 | 10 | 0.00110974 | 0.627626033 |
| -0.169217  | cg06821992 | 5  | 0.00295708 | 0.613735321 |
| -0.1692148 | cg05322273 | 1  | 0.00085514 | 0.724929591 |
| -0.1690052 | cg26236177 | 14 | 0.00633663 | 0.554534427 |
| -0.1689391 | cg02984092 | 15 | 0.00350007 | 0.76605912  |
| -0.1689258 | cg12656681 | 5  | 0.00298763 | 0.590987744 |
| -0.1688863 | cg17415265 | 17 | 0.00283619 | 0.667052115 |
| -0.168714  | cg16387593 | 16 | 0.00113396 | 0.71598583  |
| -0.1686288 | cg16474118 | 2  | 0.00523559 | 0.732304239 |
| -0.1682277 | cg23462772 | 10 | 0.01107444 | 0.558498729 |
| -0.1682131 | cg04285666 | 5  | 0.00237816 | 0.742510007 |
| -0.1682116 | cg18659867 | 10 | 0.00838282 | 0.701565379 |
| -0.1680824 | cg17642941 | 7  | 0.00273294 | 0.87539557  |
| -0.1680407 | cg03133735 | 4  | 0.00324535 | 0.508909246 |
| -0.168033  | cg09160020 | 5  | 0.00585007 | 0.853560355 |
| -0.1679373 | cg00437124 | 6  | 0.00089245 | 0.642286072 |
| -0.1678272 | cg01830023 | 5  | 0.00067869 | 0.571369431 |
| -0.1677044 | cg06660522 | 1  | 0.02589311 | 0.830930613 |
| -0.1675514 | cg04522310 | 16 | 0.00187795 | 0.696636894 |
| -0.1673007 | cg17694351 | 7  | 0.01502598 | 0.6629183   |
| -0.1672613 | cg04184716 | 14 | 0.0148883  | 0.743637359 |
| -0.1671807 | cg17242937 | 4  | 0.00041767 | 0.508498365 |
| -0.1670222 | cg27638284 | 20 | 0.00745654 | 0.557179187 |
| -0.1667783 | cg12192282 | 2  | 0.00291111 | 0.624304466 |
| -0.1666867 | cg13693328 | 1  | 0.00043585 | 0.533806608 |
| -0.166613  | cg18320356 | 12 | 0.00474003 | 0.667027005 |
| -0.166577  | cg02201914 | 4  | 0.00039753 | 0.510047027 |
| -0.1664851 | cg01987353 | 17 | 0.00235505 | 0.810316649 |
| -0.1663713 | cg24405567 | 15 | 0.01642697 | 0.798014801 |
| -0.1662561 | cg22560214 | 4  | 0.00778741 | 0.813683794 |
| -0.1661392 | cg11332163 | 4  | 0.00426214 | 0.797349187 |

|            |            |    |            |             |
|------------|------------|----|------------|-------------|
| -0.1661051 | cg16596317 | 1  | 0.00499408 | 0.619692887 |
| -0.1659349 | cg26118358 | 14 | 0.00796468 | 0.596303174 |
| -0.1658714 | cg02352281 | 3  | 0.00086257 | 0.723812055 |
| -0.1658233 | cg00213052 | 18 | 0.00036524 | 0.553895907 |
| -0.1657562 | cg15074524 | 2  | 0.00285083 | 0.690467042 |
| -0.165715  | cg18263166 | 7  | 1.74E-05   | 0.466763188 |
| -0.1656874 | cg14488466 | 9  | 0.0003122  | 0.418434907 |
| -0.1656736 | cg02292809 | 6  | 0.00026155 | 0.592274327 |
| -0.1655592 | cg15742777 | 2  | 0.00025669 | 0.519552673 |
| -0.1652708 | cg03129324 | 10 | 0.00271188 | 0.599613611 |
| -0.1652487 | cg08913523 | 8  | 0.00191143 | 0.56086789  |
| -0.1652303 | cg27365991 | 5  | 0.0005089  | 0.613990815 |
| -0.1648531 | cg00578614 | 6  | 0.00305184 | 0.580236865 |
| -0.1647079 | cg01813280 | 6  | 0.01342209 | 0.782545763 |
| -0.1646874 | cg12697139 | 1  | 0.00231086 | 0.66496737  |
| -0.1646738 | cg08871545 | 1  | 0.00010292 | 0.637212554 |
| -0.1645484 | cg21186098 | 8  | 0.00073794 | 0.528499978 |
| -0.1644561 | cg17454263 | 15 | 0.00065706 | 0.681229225 |
| -0.1644256 | cg25765315 | 12 | 0.00057702 | 0.743369627 |
| -0.1643508 | cg15317049 | 21 | 0.00035838 | 0.739976149 |
| -0.1643086 | cg18207999 | 17 | 0.00063963 | 0.527396787 |
| -0.1642708 | cg02420480 | 7  | 0.00453093 | 0.75201489  |
| -0.164239  | cg01645729 | 2  | 9.78E-05   | 0.459497278 |
| -0.1641352 | cg26236329 | 11 | 0.00184547 | 0.757926582 |
| -0.1641147 | cg15570656 | 6  | 0.04072857 | 0.7947063   |
| -0.1640576 | cg05926640 | 1  | 0.00411892 | 0.795650433 |
| -0.1640093 | cg25560696 | 6  | 0.00384224 | 0.802247168 |
| -0.1639901 | cg05616589 | 6  | 0.00071289 | 0.685204347 |
| -0.1639121 | cg16578085 | 4  | 0.00071289 | 0.652802951 |
| -0.1639074 | cg00975624 | 3  | 0.00198558 | 0.592610832 |
| -0.1638392 | cg07285237 | 6  | 0.0012115  | 0.616804025 |
| -0.1634924 | cg02314201 | 10 | 0.00019359 | 0.780483979 |
| -0.1633783 | cg16598679 | 14 | 3.72E-05   | 0.650982708 |
| -0.163367  | cg09835740 | 5  | 0.00135382 | 0.700092854 |
| -0.1631726 | cg04031093 | 1  | 0.00061087 | 0.521698281 |
| -0.1631644 | cg25766247 | 8  | 0.00298566 | 0.787308313 |
| -0.1631048 | cg16163382 | 2  | 0.00427082 | 0.790854512 |
| -0.1628957 | cg10552446 | 2  | 0.00043968 | 0.692876716 |
| -0.1628825 | cg06873024 | 1  | 0.00561162 | 0.770282514 |
| -0.1628615 | cg08698943 | 10 | 0.00179777 | 0.523028144 |
| -0.1628069 | cg03278514 | 15 | 0.00179083 | 0.717099171 |
| -0.1627415 | cg24045357 | 2  | 0.00019359 | 0.566715269 |
| -0.1626937 | cg23883632 | 14 | 0.00721147 | 0.665974005 |
| -0.162608  | cg18925601 | 7  | 0.01615666 | 0.668629238 |
| -0.1625774 | cg17609158 | 6  | 0.00130251 | 0.75148321  |
| -0.1625582 | cg24941469 | 13 | 0.04406104 | 0.4475817   |

|            |            |    |            |             |
|------------|------------|----|------------|-------------|
| -0.1624822 | cg27576694 | 7  | 0.00054166 | 0.566807889 |
| -0.1624367 | cg08422793 | 15 | 0.00429668 | 0.712299153 |
| -0.1623968 | cg07142009 | 17 | 0.0017736  | 0.693573835 |
| -0.1622813 | cg19636627 | 6  | 0.0316604  | 0.833230726 |
| -0.1621668 | cg16700163 | 16 | 0.00110694 | 0.627510916 |
| -0.1620934 | cg16704703 | 10 | 0.00107058 | 0.592476286 |
| -0.162031  | cg09564361 | 8  | 0.0002722  | 0.505311373 |
| -0.1620099 | cg03722396 | 4  | 0.00097836 | 0.456892335 |
| -0.1619318 | cg17922998 | 8  | 0.00689559 | 0.766030489 |
| -0.161919  | cg04004787 | 7  | 0.00016884 | 0.825472575 |
| -0.1618605 | cg27577928 | 4  | 0.00278276 | 0.821878669 |
| -0.1618517 | cg21052660 | 6  | 0.00679476 | 0.748494755 |
| -0.1617474 | cg06138439 | 16 | 0.00072123 | 0.70195325  |
| -0.1616738 | cg16973527 | 15 | 0.00202997 | 0.548837525 |
| -0.1616458 | cg25388800 | 5  | 0.00198827 | 0.483928486 |
| -0.161551  | cg04926881 | 7  | 0.00028199 | 0.487068504 |
| -0.1611803 | cg06159353 | 5  | 0.00425159 | 0.700142708 |
| -0.1611746 | cg07217824 | 7  | 0.00078168 | 0.621611324 |
| -0.1610612 | cg25969107 | 15 | 0.0019999  | 0.619482241 |
| -0.1610072 | cg21493768 | 14 | 0.00248462 | 0.664860254 |
| -0.1609241 | cg24100841 | 6  | 0.02153083 | 0.770525677 |
| -0.1609232 | cg14232108 | 9  | 0.00084321 | 0.634814266 |
| -0.1608579 | cg01434160 | 5  | 0.00043278 | 0.504680906 |
| -0.1606358 | cg06458771 | 6  | 0.02694715 | 0.650828383 |
| -0.1606062 | cg00835745 | 15 | 0.00140974 | 0.682595379 |
| -0.1605873 | cg00964997 | 4  | 0.00430774 | 0.848332558 |
| -0.1605387 | cg04462931 | 7  | 0.00567228 | 0.821130157 |
| -0.1604987 | cg02624905 | 6  | 0.00150509 | 0.8261804   |
| -0.1604734 | cg02059176 | 2  | 0.00223486 | 0.71140866  |
| -0.1603419 | cg03449857 | 6  | 0.02937763 | 0.770772076 |
| -0.1602533 | cg27584135 | 3  | 0.00126813 | 0.697714354 |
| -0.1602221 | cg02157626 | 6  | 0.00956556 | 0.790627825 |
| -0.1601431 | cg24459147 | 21 | 6.85E-05   | 0.56388954  |
| -0.1599314 | cg03176917 | 19 | 0.00037532 | 0.417936989 |
| -0.159912  | cg17077610 | 10 | 0.00037718 | 0.618799814 |
| -0.1597803 | cg09408917 | 21 | 0.00152272 | 0.692446522 |
| -0.159737  | cg07673740 | 4  | 0.00338219 | 0.567167535 |
| -0.1596276 | cg12593746 | 1  | 3.61E-05   | 0.442255152 |
| -0.1596001 | cg02001991 | 4  | 0.00030197 | 0.60687901  |
| -0.1595543 | cg15812586 | 7  | 0.00274669 | 0.641168817 |
| -0.1594347 | cg07283896 | 6  | 0.00137786 | 0.572884945 |
| -0.1594321 | cg06788267 | 1  | 0.00216652 | 0.72727523  |
| -0.1593497 | cg18120446 | 4  | 0.00059549 | 0.752520136 |
| -0.159328  | cg16223546 | 5  | 0.00090826 | 0.698037009 |
| -0.1593057 | cg23440636 | 5  | 0.00137005 | 0.792679476 |
| -0.1591693 | cg20082877 | 18 | 6.85E-05   | 0.625550726 |

|            |            |    |            |             |
|------------|------------|----|------------|-------------|
| -0.1591582 | cg14434062 | 15 | 0.0015025  | 0.662844289 |
| -0.1587664 | cg01025233 | 5  | 0.00036352 | 0.774124989 |
| -0.1586939 | cg02676167 | 2  | 0.00037532 | 0.685741493 |
| -0.1583354 | cg02640104 | 13 | 0.00040832 | 0.559483402 |
| -0.1582783 | cg22192489 | 5  | 8.11E-05   | 0.552855876 |
| -0.1582705 | cg23489384 | 14 | 0.00703411 | 0.490193542 |
| -0.1582184 | cg12686441 | 8  | 0.00017107 | 0.561111588 |
| -0.1582021 | cg18413218 | 14 | 0.00140015 | 0.605069677 |
| -0.1582014 | cg00747944 | 16 | 0.00031526 | 0.629861992 |
| -0.1581982 | cg16663891 | 3  | 0.00024695 | 0.687029849 |
| -0.1581363 | cg23793104 | 4  | 0.00176755 | 0.687026724 |
| -0.1580958 | cg00339682 | 4  | 0.00052608 | 0.732357273 |
| -0.1579807 | cg17033891 | 3  | 0.00033508 | 0.67225301  |
| -0.1579503 | cg06368184 | 21 | 0.00105519 | 0.721359135 |
| -0.1574785 | cg03875496 | 6  | 5.21E-05   | 0.603802773 |
| -0.1573687 | cg22500261 | 22 | 0.00101034 | 0.670469875 |
| -0.1572677 | cg06032337 | 6  | 0.01010298 | 0.584933907 |
| -0.1572251 | cg01940753 | 15 | 0.00059275 | 0.772169055 |
| -0.1572054 | cg15499368 | 5  | 6.53E-05   | 0.71230994  |
| -0.1571781 | cg03772020 | 6  | 0.00030589 | 0.772449708 |
| -0.1571752 | cg13744172 | 16 | 0.00014178 | 0.673322565 |
| -0.1571555 |            |    |            |             |
| -0.1570347 |            |    |            |             |
| -0.1568399 |            |    |            |             |
| -0.1568178 |            |    |            |             |
| -0.1567585 |            |    |            |             |
| -0.156713  |            |    |            |             |
| -0.1567076 |            |    |            |             |
| -0.156701  |            |    |            |             |
| -0.1566851 |            |    |            |             |
| -0.156666  |            |    |            |             |
| -0.1566447 |            |    |            |             |
| -0.1566384 |            |    |            |             |
| -0.1565576 |            |    |            |             |
| -0.1565261 |            |    |            |             |
| -0.1565024 |            |    |            |             |
| -0.1561356 |            |    |            |             |
| -0.1558573 |            |    |            |             |
| -0.155843  |            |    |            |             |
| -0.1558086 |            |    |            |             |
| -0.1558016 |            |    |            |             |
| -0.155623  |            |    |            |             |
| -0.1556022 |            |    |            |             |
| -0.1555812 |            |    |            |             |
| -0.1555589 |            |    |            |             |
| -0.1554995 |            |    |            |             |

-0.1554141  
-0.1554075  
-0.155354  
-0.1552865  
-0.1549987  
-0.1548438  
-0.1548306  
-0.1547621  
-0.1546434  
-0.1546347  
-0.1545877  
-0.1544718  
-0.1544559  
-0.1542841  
-0.1541801  
-0.1541312  
-0.1539712  
-0.1537931  
-0.1537737  
-0.1537209  
-0.1536269  
-0.1535256  
-0.1535075  
-0.1533426  
-0.1531903  
-0.1531779  
-0.1531365  
-0.1531166  
-0.1530842  
-0.1530402  
-0.1530069  
-0.1528448  
-0.1527826  
-0.1527462  
-0.1527346  
-0.152728  
-0.1524765  
-0.1524679  
-0.1523954  
-0.1522723  
-0.1522282  
-0.1522022  
-0.1521553  
-0.1521133  
-0.1521109  
-0.152069

-0.1520563  
-0.15203  
-0.1520285  
-0.1520089  
-0.1518183  
-0.1517686  
-0.1517182  
-0.15166  
-0.1516516  
-0.15158  
-0.1514915  
-0.151431  
-0.1513864  
-0.1512501  
-0.1510424  
-0.1509364  
-0.1508963  
-0.1508456  
-0.1508262  
-0.1508128  
-0.1507461  
-0.1506797  
-0.150668  
-0.1504838  
-0.1504487  
-0.1504114  
-0.1503867  
-0.1503529  
-0.1503463  
-0.1502786  
-0.1502348  
-0.1502164  
-0.1501951  
-0.1501111  
-0.150042  
-0.1500281  
-0.1499387  
-0.1498903  
-0.1496929  
-0.1496919  
-0.149686  
-0.1496786  
-0.1496524  
-0.1496056  
-0.1495892  
-0.1495478

-0.1492937  
-0.1489893  
-0.1489716  
-0.148848  
-0.1486826  
-0.148631  
-0.1486094  
-0.1484882  
-0.1484873  
-0.1484438  
-0.148353  
-0.1483351  
-0.1482967  
-0.1482882  
-0.1482873  
-0.1482122  
-0.1481792  
-0.1481779  
-0.1481546  
-0.1481029  
-0.147946  
-0.147865  
-0.1478288  
-0.1478194  
-0.1477766  
-0.147758  
-0.147754  
-0.1477227  
-0.147621  
-0.1476139  
-0.1475441  
-0.1475382  
-0.1474655  
-0.1474429  
-0.1472192  
-0.1472146  
-0.147165  
-0.1470411  
-0.1469131  
-0.1467803  
-0.1466547  
-0.1466472  
-0.1465028  
-0.1464008  
-0.1463854  
-0.1463589



-0.1463239  
-0.1463136  
-0.146182  
-0.1461359  
-0.1460792  
-0.1460132  
-0.1460026  
-0.1459891  
-0.1459765  
-0.145894  
-0.1458907  
-0.1458523  
-0.1458472  
-0.1457584  
-0.1457142  
-0.1456989  
-0.1455841  
-0.1455782  
-0.1455576  
-0.1454774  
-0.1454246  
-0.1454219  
-0.1454173  
-0.1453951  
-0.1453577  
-0.1453325  
-0.1452565  
-0.145246  
-0.1451987  
-0.1451791  
-0.1450785  
-0.1449666  
-0.1449596  
-0.1449004  
-0.1448494  
-0.1448208  
-0.1448025  
-0.144777  
-0.1447725  
-0.1446434  
-0.1446021  
-0.1445264  
-0.1445207  
-0.1444297  
-0.1443649  
-0.1443395

-0.1442963  
-0.1442697  
-0.1442458  
-0.1442395  
-0.144234  
-0.1442136  
-0.1441764  
-0.1441184  
-0.144055  
-0.1440345  
-0.14398  
-0.1439754  
-0.1439318  
-0.1438474  
-0.1437802  
-0.143744  
-0.1437111  
-0.1436658  
-0.1435491  
-0.1433403  
-0.1432614  
-0.14326  
-0.1432298  
-0.1432181  
-0.1431624  
-0.1431419  
-0.1431257  
-0.1430374  
-0.1429166  
-0.142912  
-0.1428994  
-0.1428528  
-0.1428458  
-0.1428426  
-0.1428035  
-0.1427296  
-0.142573  
-0.1425716  
-0.1425434  
-0.1425307  
-0.1425121  
-0.1424581  
-0.1424456  
-0.1424158  
-0.1424142  
-0.1422941

-0.142246  
-0.1421069  
-0.1419371  
-0.1418519  
-0.1418134  
-0.141795  
-0.1417242  
-0.141658  
-0.1416054  
-0.1415639  
-0.1415548  
-0.1415462  
-0.1415009  
-0.1414129  
-0.1414125  
-0.1413938  
-0.1413461  
-0.1413113  
-0.1412206  
-0.1411942  
-0.1411684  
-0.1411452  
-0.1409951  
-0.1409646  
-0.1409304  
-0.140899  
-0.1408517  
-0.1407881  
-0.1407755  
-0.1406978  
-0.1406666  
-0.1406423  
-0.1405749  
-0.1404004  
-0.14038  
-0.1403297  
-0.1401789  
-0.1401088  
-0.139962  
-0.1399513  
-0.1399327  
-0.139921  
-0.1398371  
-0.1398198  
-0.1396741  
-0.139658

-0.1396502  
-0.1395761  
-0.1395289  
-0.1393401  
-0.1393323  
-0.139284  
-0.1391701  
-0.1391631  
-0.1391411  
-0.1391345  
-0.1390645  
-0.1390502  
-0.1390322  
-0.1390203  
-0.1390183  
-0.1389987  
-0.1389581  
-0.1389416  
-0.1388658  
-0.138863  
-0.1388047  
-0.1387734  
-0.1387233  
-0.1386989  
-0.1386641  
-0.1385837  
-0.1385829  
-0.1384991  
-0.1384379  
-0.1384272  
-0.1384211  
-0.1383138  
-0.1382948  
-0.1382818  
-0.1382439  
-0.1382429  
-0.1382126  
-0.1381901  
-0.138138  
-0.1379963  
-0.1379921  
-0.1378362  
-0.1378323  
-0.1377835  
-0.1377559  
-0.1377233

-0.1377048  
-0.1376705  
-0.1376278  
-0.1375612  
-0.1374765  
-0.1373473  
-0.1372587  
-0.1372517  
-0.1372282  
-0.1370465  
-0.1370265  
-0.136983  
-0.1368762  
-0.1368597  
-0.1368465  
-0.1368057  
-0.1367467  
-0.1367035  
-0.1366753  
-0.1365976  
-0.1365819  
-0.1365809  
-0.1365794  
-0.1365633  
-0.1365226  
-0.1364987  
-0.1364683  
-0.1363848  
-0.1362406  
-0.1361947  
-0.1361622  
-0.1361059  
-0.1360741  
-0.1360737  
-0.1359842  
-0.1358321  
-0.1358239  
-0.1356984  
-0.1356128  
-0.1355535  
-0.1354667  
-0.1354548  
-0.1352886  
-0.1352655  
-0.135208  
-0.1351886

-0.1351273  
-0.1350156  
-0.1349896  
-0.1349149  
-0.1348561  
-0.1348234  
-0.1347483  
-0.1347345  
-0.1346846  
-0.134668  
-0.1345969  
-0.1345814  
-0.1344333  
-0.1344163  
-0.1343448  
-0.1343049  
-0.1342389  
-0.1342065  
-0.1341979  
-0.1341828  
-0.1341112  
-0.1339698  
-0.133964  
-0.1339566  
-0.1339068  
-0.1338748  
-0.1338187  
-0.1337825  
-0.1337404  
-0.1336099  
-0.1334474  
-0.1334245  
-0.1332909  
-0.1332316  
-0.1332195  
-0.133135  
-0.1331217  
-0.1330904  
-0.1330838  
-0.1330269  
-0.1329912  
-0.1329025  
-0.1328536  
-0.1328533  
-0.1327523  
-0.1327496

-0.13274  
-0.1327201  
-0.1326976  
-0.1326046  
-0.1324884  
-0.1324429  
-0.1324044  
-0.132403  
-0.1323831  
-0.1323557  
-0.1323499  
-0.1322894  
-0.1322894  
-0.1322598  
-0.1322439  
-0.1322374  
-0.1322161  
-0.1321918  
-0.1321606  
-0.1318584  
-0.131817  
-0.1317903  
-0.1317627  
-0.1317257  
-0.1316969  
-0.1316625  
-0.1316517  
-0.1316358  
-0.1315951  
-0.1315533  
-0.1315071  
-0.1314591  
-0.131448  
-0.1314287  
-0.1313879  
-0.1313657  
-0.1313353  
-0.1313013  
-0.1312474  
-0.1311555  
-0.1311291  
-0.131073  
-0.1310119  
-0.1310023  
-0.1308704  
-0.1308062

-0.1307438  
-0.1307214  
-0.130603  
-0.1305879  
-0.1305755  
-0.1305079  
-0.1305042  
-0.1304024  
-0.1303448  
-0.1303435  
-0.1303108  
-0.1302365  
-0.1302153  
-0.1302013  
-0.1301978  
-0.1301542  
-0.1300388  
-0.1300038  
-0.129957  
-0.1299519  
-0.1299299  
-0.1298295  
-0.1297953  
-0.1297317  
-0.1296867  
-0.129654  
-0.1296191  
-0.1296159  
-0.1295995  
-0.1295697  
-0.1295645  
-0.1295596  
-0.1295494  
-0.1295325  
-0.1295008  
-0.1293898  
-0.1293812  
-0.1293279  
-0.1292875  
-0.1292865  
-0.1292597  
-0.1292116  
-0.1291387  
-0.1291234  
-0.1291209  
-0.1289803



-0.1289589  
-0.1287578  
-0.1286711  
-0.1285691  
-0.1284738  
-0.1284505  
-0.1284196  
-0.1284053  
-0.1282769  
-0.1282666  
-0.1282379  
-0.1282286  
-0.1282201  
-0.1282039  
-0.1281345  
-0.128105  
-0.1278954  
-0.1278543  
-0.1277855  
-0.1276497  
-0.1275467  
-0.1275354  
-0.1275338  
-0.127431  
-0.1273849  
-0.127351  
-0.1272139  
-0.1272098  
-0.12716  
-0.1271368  
-0.127136  
-0.127112  
-0.1269786  
-0.1269635  
-0.1268826  
-0.1268698  
-0.1268404  
-0.1268347  
-0.1267671  
-0.1266651  
-0.1266377  
-0.1265273  
-0.1264617  
-0.1264435  
-0.1264163  
-0.1264152

-0.1263872  
-0.1263629  
-0.1263046  
-0.1263005  
-0.1262837  
-0.1262506  
-0.126139  
-0.1261197  
-0.1260157  
-0.1259192  
-0.1259181  
-0.1258578  
-0.1258138  
-0.1258002  
-0.125784  
-0.1257604  
-0.1257501  
-0.1256664  
-0.1256095  
-0.1256001  
-0.1255931  
-0.1255827  
-0.1255768  
-0.1255171  
-0.1255073  
-0.1255069  
-0.1254254  
-0.1253339  
-0.1253279  
-0.1253078  
-0.125172  
-0.1251473  
-0.1251362  
-0.1250033  
-0.1249863  
-0.1249832  
-0.124893  
-0.124864  
-0.1248188  
-0.124768  
-0.1247437  
-0.1246861  
-0.1246807  
-0.1246258  
-0.12462  
-0.1245733

-0.1245237  
-0.1244456  
-0.1244451  
-0.124425  
-0.124369  
-0.1243656  
-0.1243531  
-0.1243295  
-0.1242799  
-0.1242777  
-0.1242545  
-0.1241931  
-0.1241926  
-0.1241449  
-0.1241155  
-0.124053  
-0.1239562  
-0.1238994  
-0.1238979  
-0.1238912  
-0.1238836  
-0.1238655  
-0.1238038  
-0.1237658  
-0.1237381  
-0.1236959  
-0.1236598  
-0.1236163  
-0.1236059  
-0.1235787  
-0.1235505  
-0.1235481  
-0.1234931  
-0.1234163  
-0.1233337  
-0.1233151  
-0.1233082  
-0.1232599  
-0.1232455  
-0.1232452  
-0.1232333  
-0.1232264  
-0.1231817  
-0.1231717  
-0.1231639  
-0.1231595

-0.1231468  
-0.1229614  
-0.1228531  
-0.1227448  
-0.1227352  
-0.1226353  
-0.1226136  
-0.1225727  
-0.1225668  
-0.1225586  
-0.1225301  
-0.1225  
-0.1224889  
-0.1224199  
-0.1224121  
-0.1223156  
-0.1222939  
-0.1222508  
-0.1222466  
-0.1221971  
-0.1221679  
-0.1220555  
-0.1220398  
-0.1219809  
-0.1219496  
-0.1218797  
-0.1218505  
-0.121847  
-0.1218088  
-0.1216982  
-0.1216102  
-0.1215964  
-0.1215714  
-0.1215603  
-0.1215559  
-0.1214782  
-0.1214468  
-0.1214317  
-0.1214279  
-0.1213002  
-0.121294  
-0.1212436  
-0.121206  
-0.1212045  
-0.1211874  
-0.1210846

-0.1210439  
-0.1210313  
-0.1210057  
-0.1209091  
-0.1209008  
-0.1208107  
-0.1208026  
-0.1207851  
-0.1207102  
-0.1207051  
-0.1207046  
-0.1206736  
-0.1206012  
-0.1205944  
-0.1205861  
-0.1205738  
-0.1205095  
-0.1204911  
-0.1204312  
-0.1203964  
-0.1203658  
-0.1203629  
-0.1203367  
-0.1203205  
-0.1202981  
-0.1202841  
-0.1202216  
-0.12021  
-0.1202  
-0.120198  
-0.1201821  
-0.1201333  
-0.1201143  
-0.1200825  
-0.1200558  
-0.1200484  
-0.119923  
-0.119845  
-0.1198433  
-0.1197942  
-0.1197855  
-0.119762  
-0.1196773  
-0.119665  
-0.1196403  
-0.1196112

-0.1195623  
-0.1195168  
-0.1195143  
-0.119512  
-0.1195022  
-0.1194873  
-0.1194698  
-0.119451  
-0.1194344  
-0.1194236  
-0.1194121  
-0.1194082  
-0.1193628  
-0.1193185  
-0.1192819  
-0.1192795  
-0.1192736  
-0.1192667  
-0.1192371  
-0.1192307  
-0.1191454  
-0.1191409  
-0.1190888  
-0.1190659  
-0.1190625  
-0.1190546  
-0.118916  
-0.1188299  
-0.1188194  
-0.1187597  
-0.1186857  
-0.1186173  
-0.1185753  
-0.1185716  
-0.1185064  
-0.1184799  
-0.1184412  
-0.118409  
-0.1184047  
-0.1183929  
-0.1183484  
-0.1183467  
-0.1182667  
-0.1182594  
-0.1182327  
-0.1181738

-0.1180632  
-0.1180606  
-0.1180565  
-0.1179733  
-0.1178706  
-0.1178586  
-0.1178239  
-0.1177325  
-0.1176716  
-0.1176631  
-0.1176149  
-0.1175842  
-0.1175759  
-0.1175518  
-0.1175367  
-0.1174482  
-0.1174314  
-0.1174132  
-0.1174082  
-0.1173807  
-0.1173765  
-0.1173606  
-0.1173416  
-0.1173278  
-0.1173136  
-0.1173003  
-0.1172791  
-0.1172733  
-0.1172625  
-0.1172592  
-0.1172337  
-0.11722  
-0.1171912  
-0.1169847  
-0.116969  
-0.1169611  
-0.1169132  
-0.1168882  
-0.1168203  
-0.1167617  
-0.1167372  
-0.116734  
-0.1166919  
-0.1166516  
-0.1166376  
-0.1166284

-0.1166085  
-0.1165775  
-0.1165546  
-0.1165226  
-0.1165195  
-0.1164835  
-0.1164155  
-0.1164085  
-0.1163776  
-0.1163465  
-0.1162893  
-0.1162436  
-0.1162054  
-0.1161445  
-0.1160895  
-0.1160755  
-0.116075  
-0.1159999  
-0.1159703  
-0.1158346  
-0.1158126  
-0.1157449  
-0.1156745  
-0.1156728  
-0.1156149  
-0.1155977  
-0.1155808  
-0.1154958  
-0.1154747  
-0.115474  
-0.1154423  
-0.1154355  
-0.1154252  
-0.1154072  
-0.1153767  
-0.1153059  
-0.1152979  
-0.1152903  
-0.1152566  
-0.1152421  
-0.1151998  
-0.115188  
-0.1151791  
-0.1151729  
-0.1151682  
-0.1151648



-0.1150922  
-0.1150644  
-0.1150578  
-0.1149711  
-0.1149396  
-0.1149293  
-0.1149099  
-0.1148833  
-0.1148243  
-0.1147636  
-0.1147169  
-0.1147034  
-0.1147019  
-0.1146821  
-0.1146207  
-0.1145922  
-0.1145539  
-0.1145262  
-0.1144146  
-0.1143837  
-0.1143696  
-0.1143624  
-0.114314  
-0.1143083  
-0.1143071  
-0.1142971  
-0.1142392  
-0.1141591  
-0.1141019  
-0.1140892  
-0.1139619  
-0.1139583  
-0.113892  
-0.113874  
-0.1138692  
-0.1137096  
-0.1136803  
-0.1136536  
-0.1135281  
-0.1134356  
-0.1134108  
-0.1134102  
-0.1133874  
-0.1133367  
-0.1133345  
-0.1133161

-0.113298  
-0.113288  
-0.1132848  
-0.1132136  
-0.1131619  
-0.1131268  
-0.113108  
-0.1130565  
-0.1130404  
-0.1130363  
-0.1129884  
-0.1129855  
-0.1129826  
-0.1129779  
-0.1129458  
-0.1129335  
-0.1128871  
-0.1128401  
-0.1128369  
-0.112779  
-0.1127693  
-0.1127619  
-0.1127559  
-0.1126714  
-0.1126193  
-0.1125298  
-0.1125294  
-0.1125224  
-0.1124872  
-0.1124147  
-0.1123448  
-0.112321  
-0.1123098  
-0.1123039  
-0.1122884  
-0.1122481  
-0.1122374  
-0.1122052  
-0.1121302  
-0.1120488  
-0.1120405  
-0.1120218  
-0.112018  
-0.1120082  
-0.1119906  
-0.1119578

-0.1118747  
-0.1118389  
-0.1118025  
-0.1117675  
-0.1117181  
-0.1116605  
-0.1116493  
-0.111623  
-0.1115651  
-0.1115487  
-0.111507  
-0.1115046  
-0.1114868  
-0.1114693  
-0.1114653  
-0.1114255  
-0.1113788  
-0.1113472  
-0.1113256  
-0.1113182  
-0.1113011  
-0.1112788  
-0.111272  
-0.1112483  
-0.1111835  
-0.1111753  
-0.1111044  
-0.1110809  
-0.1110598  
-0.1110538  
-0.1110358  
-0.1110333  
-0.1110278  
-0.1110132  
-0.1109668  
-0.1109378  
-0.1109076  
-0.1108852  
-0.1108714  
-0.1108575  
-0.1106381  
-0.1105209  
-0.1105172  
-0.110481  
-0.1104715  
-0.1104576

-0.1104559  
-0.1104326  
-0.1104085  
-0.1104036  
-0.110403  
-0.1103471  
-0.1103188  
-0.1103028  
-0.1103  
-0.1102919  
-0.1102587  
-0.1102119  
-0.1101921  
-0.1101388  
-0.1101189  
-0.1101054  
-0.1100453  
-0.1100442  
-0.1100369  
-0.1099798  
-0.1099471  
-0.1099368  
-0.109839  
-0.1098286  
-0.1097833  
-0.1097683  
-0.1097464  
-0.1097389  
-0.1097302  
-0.1097299  
-0.1097247  
-0.1096774  
-0.1096239  
-0.1095308  
-0.1095072  
-0.1094756  
-0.10946  
-0.1094141  
-0.1093942  
-0.109391  
-0.1093418  
-0.1093284  
-0.1092731  
-0.1092701  
-0.1092008  
-0.1091921

-0.1091102  
-0.1090686  
-0.1090491  
-0.1090397  
-0.1090361  
-0.1090277  
-0.109002  
-0.1089375  
-0.1087579  
-0.108732  
-0.1086648  
-0.1085982  
-0.1085343  
-0.1085256  
-0.1085248  
-0.1084962  
-0.1084932  
-0.1084197  
-0.1083719  
-0.108295  
-0.1082258  
-0.1082203  
-0.1081858  
-0.1081748  
-0.1081549  
-0.1081268  
-0.1080869  
-0.1080038  
-0.1079762  
-0.1079668  
-0.1079012  
-0.1078693  
-0.1078662  
-0.1078403  
-0.1078143  
-0.10781  
-0.1078004  
-0.1077825  
-0.1077774  
-0.1077758  
-0.1076304  
-0.1075685  
-0.107564  
-0.1075516  
-0.1075257  
-0.1075139

-0.1074723  
-0.1074509  
-0.1074116  
-0.1073403  
-0.107305  
-0.1072974  
-0.1072894  
-0.1072638  
-0.107246  
-0.1071833  
-0.1071769  
-0.1071757  
-0.1071002  
-0.1070976  
-0.1070744  
-0.1070565  
-0.1070493  
-0.1070422  
-0.107012  
-0.107008  
-0.1069787  
-0.1069552  
-0.1069451  
-0.1069255  
-0.1068647  
-0.1068354  
-0.1068227  
-0.1068103  
-0.1067974  
-0.1067384  
-0.106735  
-0.1067333  
-0.1067228  
-0.1067098  
-0.1066961  
-0.1066687  
-0.106663  
-0.1066583  
-0.1066391  
-0.1066212  
-0.1066068  
-0.1065871  
-0.1065016  
-0.1065016  
-0.1064843  
-0.1064778

-0.106453  
-0.1064456  
-0.1064305  
-0.106386  
-0.1063306  
-0.1063173  
-0.1062674  
-0.1062573  
-0.1062252  
-0.1062177  
-0.1062127  
-0.1062063  
-0.1061531  
-0.1061419  
-0.106103  
-0.1060884  
-0.1060431  
-0.1059819  
-0.1059551  
-0.1059107  
-0.1058659  
-0.1058345  
-0.1057154  
-0.1056972  
-0.1055672  
-0.1055432  
-0.1055395  
-0.1054633  
-0.1054586  
-0.105457  
-0.1054457  
-0.1054382  
-0.1054376  
-0.1054297  
-0.1054163  
-0.1053296  
-0.1053235  
-0.1053154  
-0.1053082  
-0.1053036  
-0.1052791  
-0.105278  
-0.1052542  
-0.1052203  
-0.1052059  
-0.1051597

-0.1051483  
-0.1051335  
-0.1051136  
-0.1050788  
-0.1050404  
-0.1050349  
-0.1050139  
-0.105004  
-0.1049021  
-0.1048849  
-0.1048369  
-0.1047821  
-0.1047516  
-0.1047195  
-0.1047022  
-0.1046574  
-0.1046485  
-0.104591  
-0.1045738  
-0.1045707  
-0.10453  
-0.1045022  
-0.1045014  
-0.1044484  
-0.1044041  
-0.104344  
-0.1043312  
-0.104313  
-0.1042741  
-0.1042691  
-0.104246  
-0.1042148  
-0.1042059  
-0.1042039  
-0.1042021  
-0.1041792  
-0.1041564  
-0.1040807  
-0.1040301  
-0.1040211  
-0.104015  
-0.1039651  
-0.103954  
-0.1039513  
-0.1039479  
-0.1038551



-0.1038469  
-0.1038098  
-0.103688  
-0.1035303  
-0.1034652  
-0.1033996  
-0.1033907  
-0.1033755  
-0.1033049  
-0.1031749  
-0.1031666  
-0.1031586  
-0.1030727  
-0.1030471  
-0.1030425  
-0.1030346  
-0.1029982  
-0.102992  
-0.1029858  
-0.1029735  
-0.1028752  
-0.1028379  
-0.1028074  
-0.1027623  
-0.1027252  
-0.1027165  
-0.1026986  
-0.1026726  
-0.1026467  
-0.1026337  
-0.1026289  
-0.1025802  
-0.1025789  
-0.1025555  
-0.1025425  
-0.1025351  
-0.1025244  
-0.1024612  
-0.1024353  
-0.102434  
-0.1024192  
-0.1024049  
-0.102399  
-0.1023842  
-0.1023757  
-0.1023454

-0.1023431  
-0.1023225  
-0.102293  
-0.1022792  
-0.1022599  
-0.1022408  
-0.1021488  
-0.1021444  
-0.1021045  
-0.1020434  
-0.1020327  
-0.1019847  
-0.1019704  
-0.1018939  
-0.1018928  
-0.1018881  
-0.1018772  
-0.1018414  
-0.1018398  
-0.1018146  
-0.1017987  
-0.1017958  
-0.1017884  
-0.1017679  
-0.1017255  
-0.1017249  
-0.1016857  
-0.1016734  
-0.1016438  
-0.1016382  
-0.1016239  
-0.1016028  
-0.1015987  
-0.1015865  
-0.1015721  
-0.1015662  
-0.1015354  
-0.1015278  
-0.1015169  
-0.1015135  
-0.1014808  
-0.101426  
-0.1014115  
-0.10131  
-0.1012903  
-0.1012188

-0.1012007  
-0.1012004  
-0.1011975  
-0.1011714  
-0.1010628  
-0.10106  
-0.1010458  
-0.1010265  
-0.1010154  
-0.1009874  
-0.1009427  
-0.1009021  
-0.1008838  
-0.1008245  
-0.1007827  
-0.1007513  
-0.100737  
-0.1007313  
-0.1006918  
-0.1006589  
-0.1006519  
-0.1006383  
-0.1005856  
-0.1005737  
-0.1005713  
-0.1005647  
-0.1005413  
-0.1005337  
-0.1005298  
-0.1005217  
-0.1004936  
-0.1004646  
-0.1003991  
-0.1003957  
-0.1003897  
-0.1003872  
-0.1003628  
-0.1003521  
-0.1002181  
-0.100215  
-0.1001885  
-0.1001721  
-0.1000876  
-0.1000866  
-0.1000784  
-0.1000605

-0.1000573

-0.1000436

-0.1000365

-0.1000091

---

| <b>Mean <math>\beta</math>-value<br/>OAHip cluster 2</b> | <b>Delta Beta</b> |
|----------------------------------------------------------|-------------------|
| 0.327097424                                              | 0.10125016        |
| 0.62585819                                               | 0.10429134        |
| 0.667813639                                              | 0.11874635        |
| 0.522947346                                              | 0.16508974        |
| 0.327950682                                              | 0.20758132        |
| 0.677375596                                              | 0.11418586        |
| 0.721416698                                              | 0.11039546        |
| 0.155977466                                              | 0.10392101        |
| 0.610532873                                              | 0.1268184         |
| 0.523705782                                              | 0.12319658        |
| 0.604591959                                              | 0.20295433        |
| 0.689346194                                              | 0.11998477        |
| 0.648928625                                              | 0.10388981        |
| 0.627549748                                              | 0.1792658         |
| 0.528127439                                              | 0.17950661        |
| 0.191553619                                              | 0.17654577        |
| 0.623413207                                              | 0.11156054        |
| 0.414419614                                              | 0.16188535        |
| 0.392333411                                              | 0.10176479        |
| 0.530332358                                              | 0.11406461        |
| 0.527735905                                              | 0.1427446         |
| 0.667027223                                              | 0.16505628        |
| 0.326869464                                              | 0.12039286        |
| 0.375558262                                              | 0.21139371        |
| 0.130642942                                              | 0.1099815         |
| 0.474008919                                              | 0.15585077        |
| 0.388147507                                              | 0.12708734        |
| 0.188933037                                              | 0.10970817        |
| 0.761345262                                              | 0.11334488        |
| 0.588252415                                              | 0.10214442        |
| 0.347720023                                              | 0.11770536        |
| 0.385603277                                              | 0.10385479        |
| 0.48563502                                               | 0.12218051        |
| 0.524329458                                              | 0.10073382        |
| 0.278959346                                              | 0.16749672        |
| 0.370448736                                              | 0.13701315        |
| 0.316847535                                              | 0.16117775        |
| 0.519134321                                              | 0.13400658        |
| 0.278751436                                              | 0.16289959        |
| 0.544924226                                              | 0.12702375        |

|             |            |
|-------------|------------|
| 0.321179662 | 0.16106063 |
| 0.199655361 | 0.13656448 |
| 0.65562624  | 0.10407001 |
| 0.218063702 | 0.10786534 |
| 0.409695339 | 0.16138819 |
| 0.693267984 | 0.11372804 |
| 0.3748286   | 0.19893428 |
| 0.509638959 | 0.20540848 |
| 0.079337312 | 0.1333643  |
| 0.544701602 | 0.13709049 |
| 0.621342962 | 0.10007408 |
| 0.476912332 | 0.11756637 |
| 0.300710194 | 0.12430974 |
| 0.753069094 | 0.13667387 |
| 0.656227821 | 0.10024383 |
| 0.668585432 | 0.13708425 |
| 0.618053901 | 0.18376136 |
| 0.165094448 | 0.1950141  |
| 0.573706767 | 0.15147716 |
| 0.494689111 | 0.1098943  |
| 0.36218136  | 0.10122347 |
| 0.450149665 | 0.16446603 |
| 0.57447693  | 0.17503279 |
| 0.520956704 | 0.10445775 |
| 0.632752195 | 0.1429151  |
| 0.405187662 | 0.15380555 |
| 0.392791029 | 0.10035323 |
| 0.663699272 | 0.10620034 |
| 0.370090739 | 0.10795282 |
| 0.545697794 | 0.19121425 |
| 0.760539461 | 0.10152589 |
| 0.62538338  | 0.10686102 |
| 0.672807973 | 0.10827397 |
| 0.757714903 | 0.11330619 |
| 0.190086131 | 0.11798165 |
| 0.388425972 | 0.12054266 |
| 0.252033362 | 0.12446265 |
| 0.637903596 | 0.12870982 |
| 0.45790568  | 0.15382374 |
| 0.246417785 | 0.15493933 |
| 0.309522414 | 0.16161229 |
| 0.568310859 | 0.17673924 |
| 0.44580087  | 0.13273585 |
| 0.541419102 | 0.11150602 |
| 0.618232609 | 0.10148149 |
| 0.669054084 | 0.15284475 |

|             |            |
|-------------|------------|
| 0.65993618  | 0.1572774  |
| 0.522489913 | 0.15071461 |
| 0.708047907 | 0.11820106 |
| 0.359723439 | 0.23591698 |
| 0.152497744 | 0.11215803 |
| 0.207313205 | 0.11217104 |
| 0.802550278 | 0.10231819 |
| 0.69658439  | 0.12995352 |
| 0.375095055 | 0.18854775 |
| 0.521141952 | 0.11088944 |
| 0.607815253 | 0.13180926 |
| 0.718918962 | 0.11673457 |
| 0.508005748 | 0.12000405 |
| 0.303533283 | 0.10660444 |
| 0.148806631 | 0.10746091 |
| 0.504414923 | 0.12654076 |
| 0.163239531 | 0.1858902  |
| 0.658044491 | 0.14850909 |
| 0.572326238 | 0.11045074 |
| 0.16346244  | 0.10832005 |
| 0.514150489 | 0.2148802  |
| 0.186236984 | 0.10711757 |
| 0.262545621 | 0.11359692 |
| 0.462732024 | 0.12186579 |
| 0.274896228 | 0.11842039 |
| 0.217284628 | 0.11924577 |
| 0.479983176 | 0.25931918 |
| 0.394200251 | 0.16619206 |
| 0.666305579 | 0.16992644 |
| 0.290504215 | 0.1272368  |
| 0.397384878 | 0.16936601 |
| 0.27965626  | 0.1125267  |
| 0.398945973 | 0.14478087 |
| 0.352979544 | 0.2403214  |
| 0.609391294 | 0.10159102 |
| 0.446150007 | 0.17321152 |
| 0.396574634 | 0.16806056 |
| 0.587308553 | 0.23278026 |
| 0.582908904 | 0.14702347 |
| 0.291770533 | 0.14823667 |
| 0.318389256 | 0.13598402 |
| 0.519945077 | 0.14499941 |
| 0.414592667 | 0.10158772 |
| 0.475797391 | 0.16942332 |
| 0.171164988 | 0.11749767 |
| 0.368816903 | 0.10446455 |

|             |            |
|-------------|------------|
| 0.431852035 | 0.12759627 |
| 0.445817817 | 0.21585522 |
| 0.397601276 | 0.12000393 |
| 0.561960555 | 0.14794995 |
| 0.587111519 | 0.11759559 |
| 0.33692135  | 0.19701357 |
| 0.44954973  | 0.10960691 |
| 0.405696671 | 0.15876674 |
| 0.16473912  | 0.20947343 |
| 0.62603669  | 0.15019566 |
| 0.729710472 | 0.11236815 |
| 0.328503525 | 0.18245998 |
| 0.253098249 | 0.24847506 |
| 0.302143417 | 0.12828465 |
| 0.304154287 | 0.10222351 |
| 0.478143468 | 0.16373341 |
| 0.488863224 | 0.16419168 |
| 0.359700552 | 0.1864777  |
| 0.758619402 | 0.12823136 |
| 0.420906623 | 0.12138858 |
| 0.264442705 | 0.15608349 |
| 0.63756887  | 0.1123004  |
| 0.374553347 | 0.16571535 |
| 0.396092241 | 0.22879353 |
| 0.092662886 | 0.13369913 |
| 0.18075376  | 0.11218318 |
| 0.333871803 | 0.18857297 |
| 0.124814897 | 0.10275284 |
| 0.649486495 | 0.2078056  |
| 0.594953424 | 0.13971379 |
| 0.582206914 | 0.11140426 |
| 0.608918412 | 0.10832397 |
| 0.677451512 | 0.24575013 |
| 0.410488311 | 0.15338454 |
| 0.377824847 | 0.10569717 |
| 0.458336883 | 0.18615492 |
| 0.463421483 | 0.13303797 |
| 0.61717423  | 0.15362327 |
| 0.435644748 | 0.20475642 |
| 0.449905756 | 0.14419596 |
| 0.463020249 | 0.24338915 |
| 0.599056658 | 0.10761599 |
| 0.166779887 | 0.10090957 |
| 0.234496609 | 0.14884539 |
| 0.634941485 | 0.185989   |
| 0.49677412  | 0.10407549 |



|             |            |
|-------------|------------|
| 0.437509116 | 0.19636841 |
| 0.73507698  | 0.10492081 |
| 0.573838799 | 0.14473405 |
| 0.448258452 | 0.1951431  |
| 0.652903598 | 0.10530715 |
| 0.362674878 | 0.15126251 |
| 0.454763047 | 0.18922173 |
| 0.291396404 | 0.17015134 |
| 0.447021973 | 0.11036066 |
| 0.497777251 | 0.26291171 |
| 0.333643073 | 0.10130706 |
| 0.514600959 | 0.10224903 |
| 0.577485388 | 0.16316396 |
| 0.212490311 | 0.12948913 |
| 0.628599503 | 0.17703555 |
| 0.463535433 | 0.11333986 |
| 0.678456724 | 0.12486775 |
| 0.346109508 | 0.21758032 |
| 0.46563693  | 0.12333689 |
| 0.646829934 | 0.13248878 |
| 0.250727727 | 0.13622163 |
| 0.147526583 | 0.10759856 |
| 0.149214377 | 0.14343622 |
| 0.31600308  | 0.13617769 |
| 0.425425879 | 0.1769251  |
| 0.590232032 | 0.12183256 |
| 0.174794091 | 0.15312503 |
| 0.174425418 | 0.16670431 |
| 0.521914637 | 0.12659864 |
| 0.410782078 | 0.15756253 |
| 0.479813325 | 0.18242927 |
| 0.215194258 | 0.13126912 |
| 0.283504587 | 0.11035317 |
| 0.21029369  | 0.1201796  |
| 0.545263485 | 0.12289699 |
| 0.657670192 | 0.12908308 |
| 0.63489547  | 0.13487916 |
| 0.21487784  | 0.18152288 |
| 0.28244549  | 0.19398771 |
| 0.471314583 | 0.22064302 |
| 0.384699061 | 0.22315638 |
| 0.391201731 | 0.26370418 |
| 0.370949314 | 0.27005828 |
| 0.207736642 | 0.13394667 |
| 0.389955603 | 0.18721122 |
| 0.73628043  | 0.11006517 |

|             |            |
|-------------|------------|
| 0.629686903 | 0.14571341 |
| 0.507826948 | 0.1049778  |
| 0.135182739 | 0.14998174 |
| 0.096106602 | 0.15939086 |
| 0.57956208  | 0.10646591 |
| 0.701642676 | 0.10916616 |
| 0.693831814 | 0.14196709 |
| 0.592156078 | 0.14212387 |
| 0.485214356 | 0.15437902 |
| 0.513028165 | 0.16458935 |
| 0.612993538 | 0.12417782 |
| 0.328543553 | 0.14698606 |
| 0.718479314 | 0.10563035 |
| 0.379553485 | 0.12158247 |
| 0.662904478 | 0.161536   |
| 0.307450906 | 0.13887048 |
| 0.568693798 | 0.13469544 |
| 0.574328496 | 0.14580852 |
| 0.732203816 | 0.11348315 |
| 0.677848438 | 0.13143402 |
| 0.60824566  | 0.15138568 |
| 0.279511284 | 0.16474083 |
| 0.608765417 | 0.10127206 |
| 0.620487153 | 0.13187987 |
| 0.554188245 | 0.12408811 |
| 0.485046467 | 0.13595139 |
| 0.27579782  | 0.10060661 |
| 0.699408668 | 0.10409375 |
| 0.355779284 | 0.12956163 |
| 0.198329199 | 0.14087436 |
| 0.248402594 | 0.10862289 |
| 0.123567641 | 0.1529377  |
| 0.580697244 | 0.1140961  |
| 0.431743301 | 0.12284629 |
| 0.124193503 | 0.13105712 |
| 0.681241187 | 0.18067136 |
| 0.461871506 | 0.11747917 |
| 0.56018132  | 0.19566771 |
| 0.282504685 | 0.2008898  |
| 0.170951961 | 0.14648587 |
| 0.491545848 | 0.19366652 |
| 0.599892208 | 0.10662213 |
| 0.275746467 | 0.12258458 |
| 0.266473475 | 0.18725247 |
| 0.254204518 | 0.10815712 |
| 0.557248739 | 0.14032138 |

|             |            |
|-------------|------------|
| 0.336244218 | 0.14463684 |
| 0.636727777 | 0.10707039 |
| 0.614798566 | 0.12366022 |
| 0.296559101 | 0.24745456 |
| 0.355192217 | 0.11821784 |
| 0.406832878 | 0.35882065 |
| 0.687659501 | 0.10310339 |
| 0.644706862 | 0.14160044 |
| 0.615965527 | 0.17721072 |
| 0.624685082 | 0.22535952 |
| 0.449868336 | 0.14969428 |
| 0.210916636 | 0.11307912 |
| 0.455566027 | 0.16889421 |
| 0.274905662 | 0.10042884 |
| 0.313263888 | 0.1043642  |
| 0.467545826 | 0.16316729 |
| 0.164301544 | 0.11640975 |
| 0.576954298 | 0.23114275 |
| 0.173252786 | 0.15128082 |
| 0.102164096 | 0.15318917 |
| 0.173753175 | 0.17480487 |
| 0.600274193 | 0.10760677 |
| 0.195425112 | 0.15134265 |
| 0.319039301 | 0.11228567 |
| 0.474150637 | 0.21187112 |
| 0.321726793 | 0.10708441 |
| 0.470303238 | 0.15355306 |
| 0.384089423 | 0.18684952 |
| 0.623868223 | 0.13285908 |
| 0.406035327 | 0.1168281  |
| 0.368327633 | 0.10302211 |
| 0.631499441 | 0.10471089 |
| 0.596191563 | 0.13849247 |
| 0.343261349 | 0.12794913 |
| 0.631068235 | 0.13669464 |
| 0.496219362 | 0.22671451 |
| 0.742910278 | 0.11957593 |
| 0.455934019 | 0.12921293 |
| 0.646720252 | 0.17358357 |
| 0.324779743 | 0.18993655 |
| 0.657322198 | 0.16281398 |
| 0.34637238  | 0.25489669 |
| 0.216343801 | 0.15627953 |
| 0.643974728 | 0.10052976 |
| 0.685717002 | 0.16578365 |
| 0.179130805 | 0.1312594  |

|             |            |
|-------------|------------|
| 0.514903013 | 0.13888092 |
| 0.473159713 | 0.12248363 |
| 0.350685876 | 0.13346689 |
| 0.31802594  | 0.14588626 |
| 0.254803712 | 0.1618535  |
| 0.724419384 | 0.10888349 |
| 0.478547359 | 0.13578977 |
| 0.613008169 | 0.14249671 |
| 0.421431628 | 0.14509345 |
| 0.373416121 | 0.23448983 |
| 0.23172412  | 0.12883324 |
| 0.337283978 | 0.18056814 |
| 0.403052407 | 0.18258125 |
| 0.509995558 | 0.12938033 |
| 0.498774156 | 0.12302295 |
| 0.680389783 | 0.17876569 |
| 0.350761902 | 0.22510248 |
| 0.37126679  | 0.26067569 |
| 0.270904066 | 0.10458051 |
| 0.291640625 | 0.14665871 |
| 0.523346186 | 0.18600497 |
| 0.639112658 | 0.14753401 |
| 0.369819459 | 0.140092   |
| 0.176748475 | 0.1014693  |
| 0.754493972 | 0.12089185 |
| 0.750307754 | 0.11574586 |
| 0.613479613 | 0.12873674 |
| 0.216605798 | 0.19352461 |
| 0.169124317 | 0.13050757 |
| 0.128809876 | 0.1562146  |
| 0.553777126 | 0.2390124  |
| 0.580432198 | 0.16561852 |
| 0.676858721 | 0.1061588  |
| 0.307621064 | 0.15432616 |
| 0.519323598 | 0.16337902 |
| 0.290934304 | 0.16878589 |
| 0.772314494 | 0.10057273 |
| 0.379007327 | 0.14902034 |
| 0.411428897 | 0.16643743 |
| 0.771873166 | 0.1031635  |
| 0.271912882 | 0.12570273 |
| 0.486067385 | 0.12089499 |
| 0.367099719 | 0.22905127 |
| 0.402216468 | 0.11324624 |
| 0.214690984 | 0.12001888 |
| 0.12499093  | 0.11353967 |

|             |            |
|-------------|------------|
| 0.310221536 | 0.12024151 |
| 0.25034622  | 0.16252656 |
| 0.473748461 | 0.17088056 |
| 0.566936603 | 0.17349151 |
| 0.770961469 | 0.11618254 |
| 0.729689434 | 0.13849132 |
| 0.258955498 | 0.16360715 |
| 0.736793015 | 0.1085151  |
| 0.483094599 | 0.15880156 |
| 0.450477483 | 0.12481055 |
| 0.325073343 | 0.12963188 |
| 0.334193877 | 0.16106246 |
| 0.353451926 | 0.13007773 |
| 0.397561149 | 0.11881928 |
| 0.250897994 | 0.13399249 |
| 0.376641187 | 0.11321636 |
| 0.658191283 | 0.14999971 |
| 0.661160849 | 0.1222142  |
| 0.303692727 | 0.18450415 |
| 0.353478234 | 0.15341399 |
| 0.685705796 | 0.11128622 |
| 0.723984988 | 0.15155695 |
| 0.24445809  | 0.1023671  |
| 0.371911496 | 0.10102793 |
| 0.047603828 | 0.10736192 |
| 0.412430871 | 0.15627323 |
| 0.110738814 | 0.17843218 |
| 0.679941084 | 0.13827594 |
| 0.602984424 | 0.16957338 |
| 0.629375002 | 0.13366383 |
| 0.295290224 | 0.12822236 |
| 0.454259319 | 0.13331312 |
| 0.545005488 | 0.11344262 |
| 0.303362513 | 0.14384025 |
| 0.709211531 | 0.11023128 |
| 0.502438038 | 0.16075355 |
| 0.376176375 | 0.11173266 |
| 0.747058068 | 0.10573522 |
| 0.385562203 | 0.21648644 |
| 0.622028397 | 0.10816293 |
| 0.307741023 | 0.32608244 |
| 0.576115898 | 0.12061387 |
| 0.717060874 | 0.12292732 |
| 0.213356713 | 0.10733438 |
| 0.31822404  | 0.12010038 |
| 0.670902728 | 0.1250599  |

|             |            |
|-------------|------------|
| 0.419505587 | 0.17632973 |
| 0.474710083 | 0.11699406 |
| 0.641844661 | 0.1037474  |
| 0.689223106 | 0.10491084 |
| 0.435416032 | 0.12527212 |
| 0.403112016 | 0.24646186 |
| 0.412496588 | 0.24093922 |
| 0.372423933 | 0.1408522  |
| 0.649821865 | 0.11519956 |
| 0.282454349 | 0.19118268 |
| 0.541666849 | 0.1095999  |
| 0.397359347 | 0.1877081  |
| 0.545359614 | 0.13116678 |
| 0.282766993 | 0.1565562  |
| 0.113824671 | 0.10883442 |
| 0.387393883 | 0.16033586 |
| 0.377408327 | 0.16460974 |
| 0.626235485 | 0.15100366 |
| 0.329628027 | 0.11584585 |
| 0.228394422 | 0.18642973 |
| 0.450003705 | 0.37484736 |
| 0.098501797 | 0.13379143 |
| 0.114664988 | 0.12570233 |
| 0.46791854  | 0.12696765 |
| 0.11915344  | 0.10525798 |
| 0.360639913 | 0.1409576  |
| 0.485231046 | 0.16352958 |
| 0.386318084 | 0.12456132 |
| 0.240219321 | 0.10102062 |
| 0.543765495 | 0.24835066 |
| 0.771338175 | 0.11648383 |
| 0.333883005 | 0.12594495 |
| 0.5743973   | 0.10104231 |
| 0.320534245 | 0.20069704 |
| 0.302936245 | 0.13443447 |
| 0.386180307 | 0.13741739 |
| 0.333564888 | 0.11774813 |
| 0.252819435 | 0.10744656 |
| 0.667543445 | 0.1195287  |
| 0.639589612 | 0.1216453  |
| 0.3490877   | 0.20595952 |
| 0.456659351 | 0.1492647  |
| 0.476967304 | 0.16162525 |
| 0.571236057 | 0.11085406 |
| 0.593365873 | 0.13983945 |
| 0.492877242 | 0.13153843 |

|             |            |
|-------------|------------|
| 0.555854592 | 0.10388678 |
| 0.418853237 | 0.12416135 |
| 0.428482012 | 0.15048804 |
| 0.411075627 | 0.17184232 |
| 0.175566822 | 0.10914141 |
| 0.656304283 | 0.12892458 |
| 0.311153888 | 0.14731411 |
| 0.52916644  | 0.1472515  |
| 0.478993643 | 0.21154214 |
| 0.524940201 | 0.16784415 |
| 0.681500211 | 0.11289594 |
| 0.554982195 | 0.22290669 |
| 0.269024903 | 0.12592361 |
| 0.41496467  | 0.14222746 |
| 0.142320495 | 0.19272037 |
| 0.289957541 | 0.14768218 |
| 0.477082846 | 0.13631496 |
| 0.582728513 | 0.14041523 |
| 0.707471241 | 0.12193866 |
| 0.261537843 | 0.12598244 |
| 0.554605424 | 0.12923781 |
| 0.572667255 | 0.10863578 |
| 0.394637473 | 0.10696462 |
| 0.704861116 | 0.13075755 |
| 0.158752739 | 0.15900882 |
| 0.233239541 | 0.26415007 |
| 0.528464067 | 0.14561491 |
| 0.379208333 | 0.1049482  |
| 0.32618921  | 0.15890231 |
| 0.282699607 | 0.10887895 |
| 0.524840665 | 0.10319758 |
| 0.118846657 | 0.10731923 |
| 0.469208247 | 0.14032675 |
| 0.648897529 | 0.11044689 |
| 0.434002546 | 0.19412917 |
| 0.674594277 | 0.10793847 |
| 0.48777921  | 0.11813879 |
| 0.424465824 | 0.33050028 |
| 0.600404355 | 0.12243441 |
| 0.585257779 | 0.1042442  |
| 0.146509503 | 0.14873136 |
| 0.412724555 | 0.14418839 |
| 0.584870719 | 0.13985221 |
| 0.318474812 | 0.16344572 |
| 0.301320703 | 0.11264273 |
| 0.283818395 | 0.12025229 |

|             |            |
|-------------|------------|
| 0.189426625 | 0.14149323 |
| 0.181057593 | 0.14519453 |
| 0.471337927 | 0.1521443  |
| 0.626314879 | 0.10602982 |
| 0.252616283 | 0.11739821 |
| 0.262161753 | 0.16559547 |
| 0.409003125 | 0.11910466 |
| 0.71187072  | 0.12070687 |
| 0.316063897 | 0.24002461 |
| 0.391599249 | 0.14778599 |
| 0.669789242 | 0.11048885 |
| 0.746305845 | 0.10322799 |
| 0.620891927 | 0.10339353 |
| 0.2625926   | 0.17601054 |
| 0.420764909 | 0.11947893 |
| 0.580675258 | 0.19597227 |
| 0.757050573 | 0.11397363 |
| 0.441709206 | 0.14997689 |
| 0.667713547 | 0.10414719 |
| 0.645561148 | 0.12207336 |
| 0.312323207 | 0.15629157 |
| 0.349376704 | 0.12556747 |
| 0.444201253 | 0.1977051  |
| 0.689860062 | 0.13714392 |
| 0.324996446 | 0.10736066 |
| 0.421547562 | 0.19851326 |
| 0.51231329  | 0.10795978 |
| 0.677564997 | 0.11675031 |
| 0.332621743 | 0.15067014 |
| 0.633219942 | 0.11576903 |
| 0.338217232 | 0.11608734 |
| 0.23145621  | 0.12856814 |
| 0.4491429   | 0.1033243  |
| 0.528659064 | 0.14187831 |
| 0.642454068 | 0.14861938 |
| 0.5930131   | 0.1712619  |
| 0.562082362 | 0.12315446 |
| 0.266309573 | 0.12939977 |
| 0.466716971 | 0.19077624 |
| 0.64099377  | 0.13419099 |
| 0.330116906 | 0.20501577 |
| 0.699631569 | 0.10041076 |
| 0.308863955 | 0.13709972 |
| 0.138071235 | 0.23004988 |
| 0.68705174  | 0.10756817 |
| 0.359274984 | 0.113512   |



|             |            |
|-------------|------------|
| 0.314538081 | 0.11284744 |
| 0.734587116 | 0.10646152 |
| 0.751924183 | 0.10487506 |
| 0.419835304 | 0.18131409 |
| 0.576740639 | 0.13594535 |
| 0.4109151   | 0.12710783 |
| 0.663941671 | 0.10107949 |
| 0.619997555 | 0.10872912 |
| 0.696566745 | 0.11906125 |
| 0.291045    | 0.10538734 |
| 0.220119803 | 0.11983578 |
| 0.441314657 | 0.14626518 |
| 0.538647208 | 0.14561861 |
| 0.635397754 | 0.15303871 |
| 0.444692808 | 0.2540775  |
| 0.373126746 | 0.28249064 |
| 0.310267693 | 0.13112351 |
| 0.663862483 | 0.11308789 |
| 0.142724714 | 0.13003318 |
| 0.580476957 | 0.15862693 |
| 0.171518627 | 0.11085303 |
| 0.401481146 | 0.11844467 |
| 0.298647167 | 0.13384591 |
| 0.575320833 | 0.112947   |
| 0.157431278 | 0.12218777 |
| 0.671235505 | 0.13643242 |
| 0.515547732 | 0.18573027 |
| 0.71920707  | 0.10557008 |
| 0.24969387  | 0.13011478 |
| 0.172066974 | 0.12260608 |
| 0.229254301 | 0.10691793 |
| 0.353586934 | 0.12559588 |
| 0.280316391 | 0.14756361 |
| 0.388366525 | 0.11292663 |
| 0.518815156 | 0.23028045 |
| 0.483944846 | 0.18831188 |
| 0.58032261  | 0.13440706 |
| 0.322311467 | 0.18357876 |
| 0.727727007 | 0.10803803 |
| 0.536442034 | 0.10941207 |
| 0.602527806 | 0.12587817 |
| 0.337538402 | 0.21296086 |
| 0.588841162 | 0.10120845 |
| 0.326696015 | 0.16994602 |
| 0.562942371 | 0.13876185 |
| 0.298023985 | 0.11845371 |

|             |            |
|-------------|------------|
| 0.43530599  | 0.30402769 |
| 0.519358781 | 0.13062894 |
| 0.656087039 | 0.15456404 |
| 0.528797156 | 0.10263535 |
| 0.474475698 | 0.13138506 |
| 0.652631257 | 0.11825316 |
| 0.643402193 | 0.14936589 |
| 0.479583286 | 0.15854029 |
| 0.299705136 | 0.1604077  |
| 0.280441423 | 0.18629528 |
| 0.422277893 | 0.21163755 |
| 0.291332791 | 0.11996099 |
| 0.174027444 | 0.12485566 |
| 0.574526245 | 0.14921795 |
| 0.59977349  | 0.20956099 |
| 0.252219407 | 0.15049885 |
| 0.694847618 | 0.11107272 |
| 0.456412846 | 0.20180394 |
| 0.453230365 | 0.11919024 |
| 0.220612325 | 0.12105296 |
| 0.538123676 | 0.14454312 |
| 0.086064384 | 0.11178115 |
| 0.647277606 | 0.10331825 |
| 0.18663312  | 0.17474492 |
| 0.401339817 | 0.17156704 |
| 0.307905374 | 0.16679925 |
| 0.260879638 | 0.14443321 |
| 0.535164347 | 0.17648899 |
| 0.31350701  | 0.20369028 |
| 0.787662443 | 0.10995868 |
| 0.557316712 | 0.1055819  |
| 0.547361276 | 0.11143014 |
| 0.604120695 | 0.11259026 |
| 0.600538748 | 0.12406463 |
| 0.285491064 | 0.1268765  |
| 0.411323368 | 0.15454087 |
| 0.267167579 | 0.12255138 |
| 0.346914953 | 0.13603804 |
| 0.643469558 | 0.13635403 |
| 0.567596602 | 0.12938462 |
| 0.528324274 | 0.15441933 |
| 0.270405782 | 0.14056977 |
| 0.448926893 | 0.15240713 |
| 0.303593002 | 0.16387432 |
| 0.310842037 | 0.11365526 |
| 0.31321276  | 0.23160754 |

|             |            |
|-------------|------------|
| 0.363643311 | 0.15259241 |
| 0.562791714 | 0.1456901  |
| 0.396938768 | 0.1009138  |
| 0.208755853 | 0.15395587 |
| 0.282227488 | 0.13129313 |
| 0.37456778  | 0.12644166 |
| 0.670775685 | 0.12187987 |
| 0.353906589 | 0.13248125 |
| 0.458683734 | 0.12538461 |
| 0.732999388 | 0.13591005 |
| 0.532944799 | 0.24599981 |
| 0.599379647 | 0.11937419 |
| 0.203106347 | 0.1287372  |
| 0.393956408 | 0.30745978 |
| 0.447787055 | 0.12114592 |
| 0.156703155 | 0.11559386 |
| 0.493227794 | 0.14678948 |
| 0.761649095 | 0.10723174 |
| 0.31604962  | 0.12634478 |
| 0.663047776 | 0.12333809 |
| 0.291680099 | 0.10218559 |
| 0.55308817  | 0.14573875 |
| 0.493142607 | 0.15342998 |
| 0.441956486 | 0.17090607 |
| 0.492097532 | 0.22200937 |
| 0.426226071 | 0.1149612  |
| 0.226756798 | 0.14064352 |
| 0.468049531 | 0.20450316 |
| 0.446100577 | 0.12907166 |
| 0.307709314 | 0.13153454 |
| 0.213553343 | 0.16672664 |
| 0.448826862 | 0.12316534 |
| 0.233422745 | 0.16530021 |
| 0.644454679 | 0.13109511 |
| 0.19815845  | 0.14931737 |
| 0.586936474 | 0.15910431 |
| 0.741540795 | 0.1027037  |
| 0.304195422 | 0.18086062 |
| 0.637952409 | 0.1671774  |
| 0.390032464 | 0.14156168 |
| 0.445845446 | 0.13252946 |
| 0.385726114 | 0.13783894 |
| 0.479030618 | 0.20136792 |
| 0.48395936  | 0.24675638 |
| 0.230700121 | 0.1322507  |
| 0.538160149 | 0.21379201 |

|             |            |
|-------------|------------|
| 0.381562939 | 0.23603081 |
| 0.518549218 | 0.1051378  |
| 0.524610374 | 0.11354443 |
| 0.094560595 | 0.11025964 |
| 0.521933237 | 0.16674261 |
| 0.627008466 | 0.11168573 |
| 0.546277092 | 0.12099443 |
| 0.589548798 | 0.16543486 |
| 0.277185807 | 0.16063542 |
| 0.699819031 | 0.12738684 |
| 0.425824971 | 0.22738339 |
| 0.705335877 | 0.10346408 |
| 0.539085505 | 0.22159829 |
| 0.445080297 | 0.11206366 |
| 0.713046351 | 0.11793735 |
| 0.450799485 | 0.11478602 |
| 0.241663772 | 0.14686274 |
| 0.491904438 | 0.13989601 |
| 0.603378119 | 0.12945254 |
| 0.335923963 | 0.1218719  |
| 0.656304861 | 0.12879695 |
| 0.29055165  | 0.11702325 |
| 0.46455731  | 0.10605323 |
| 0.292887381 | 0.12881904 |
| 0.379761927 | 0.1094604  |
| 0.670148711 | 0.18734296 |
| 0.618982376 | 0.20197589 |
| 0.527040946 | 0.13842109 |
| 0.61930496  | 0.13856185 |
| 0.515082658 | 0.15662541 |
| 0.285396948 | 0.1821725  |
| 0.296188266 | 0.18224822 |
| 0.318716259 | 0.12394502 |
| 0.465848904 | 0.13313611 |
| 0.394510675 | 0.23046376 |
| 0.738687463 | 0.12111735 |
| 0.232544549 | 0.16952504 |
| 0.401063394 | 0.22759277 |
| 0.505109363 | 0.24162321 |
| 0.677780305 | 0.13248966 |
| 0.555541966 | 0.16636501 |
| 0.680795442 | 0.10130325 |
| 0.360422825 | 0.20838761 |
| 0.214793561 | 0.10771149 |
| 0.244647569 | 0.14089958 |
| 0.342945831 | 0.10062946 |

|             |            |
|-------------|------------|
| 0.650095191 | 0.12709989 |
| 0.17010286  | 0.11884721 |
| 0.237138513 | 0.16123467 |
| 0.476389556 | 0.13461985 |
| 0.23860589  | 0.14078675 |
| 0.297191238 | 0.10291744 |
| 0.589738942 | 0.18138474 |
| 0.396444703 | 0.27447144 |
| 0.185683419 | 0.15634364 |
| 0.58509385  | 0.19189756 |
| 0.428172722 | 0.11556173 |
| 0.351559554 | 0.13174607 |
| 0.462513283 | 0.10634726 |
| 0.349070069 | 0.13334486 |
| 0.668416282 | 0.10476384 |
| 0.298091828 | 0.21345591 |
| 0.437349599 | 0.199239   |
| 0.801059478 | 0.11714073 |
| 0.437825307 | 0.11811676 |
| 0.420762377 | 0.1038851  |
| 0.335325213 | 0.1146976  |
| 0.453839958 | 0.13110672 |
| 0.4878188   | 0.13253499 |
| 0.530438087 | 0.1175478  |
| 0.263629626 | 0.10300904 |
| 0.366028465 | 0.11708057 |
| 0.564260438 | 0.1185755  |
| 0.38616032  | 0.13462508 |
| 0.199685448 | 0.32136271 |
| 0.732440639 | 0.1152575  |
| 0.168462978 | 0.12140878 |
| 0.625364696 | 0.11302999 |
| 0.63392896  | 0.11378765 |
| 0.558190951 | 0.11268959 |
| 0.470789442 | 0.12546336 |
| 0.610038855 | 0.10865353 |
| 0.317772708 | 0.13165969 |
| 0.152377672 | 0.10899684 |
| 0.259486545 | 0.12749559 |
| 0.5910554   | 0.12658087 |
| 0.332009315 | 0.14228724 |
| 0.455233282 | 0.15459591 |
| 0.590301424 | 0.10865452 |
| 0.619991363 | 0.1467542  |
| 0.640960122 | 0.20247776 |
| 0.327342944 | 0.18221699 |

|             |            |
|-------------|------------|
| 0.230967854 | 0.1026197  |
| 0.334666866 | 0.20734004 |
| 0.30452456  | 0.15097063 |
| 0.652940868 | 0.1851011  |
| 0.400681676 | 0.11362664 |
| 0.358048425 | 0.11944155 |
| 0.333075037 | 0.15237616 |
| 0.247971265 | 0.21944748 |
| 0.622817465 | 0.22227159 |
| 0.580816134 | 0.1638009  |
| 0.375749213 | 0.21824791 |
| 0.481819014 | 0.30111884 |
| 0.22321159  | 0.11275151 |
| 0.150424412 | 0.10463525 |
| 0.306261612 | 0.15440742 |
| 0.447646336 | 0.11552759 |
| 0.290759745 | 0.10063575 |
| 0.388165445 | 0.11458568 |
| 0.425986662 | 0.24954266 |
| 0.691171985 | 0.12815982 |
| 0.607840667 | 0.10946093 |
| 0.699652896 | 0.12805305 |
| 0.57404059  | 0.13661082 |
| 0.272707873 | 0.14526198 |
| 0.250272016 | 0.16014728 |
| 0.658557024 | 0.10712563 |
| 0.355027274 | 0.1223066  |
| 0.619007582 | 0.1614733  |
| 0.231266194 | 0.16595498 |
| 0.629168558 | 0.14525448 |
| 0.305808084 | 0.140828   |
| 0.310742495 | 0.19996991 |
| 0.739519356 | 0.10557537 |
| 0.689260431 | 0.12241073 |
| 0.334745403 | 0.12173383 |
| 0.201169821 | 0.19229163 |
| 0.62431821  | 0.13377834 |
| 0.378181479 | 0.19096395 |
| 0.605206972 | 0.15355085 |
| 0.194496539 | 0.10684522 |
| 0.287924575 | 0.12900713 |
| 0.48862964  | 0.1479536  |
| 0.205146322 | 0.16757661 |
| 0.262855559 | 0.2694236  |
| 0.127433121 | 0.11391121 |
| 0.447139275 | 0.27212645 |

|             |            |
|-------------|------------|
| 0.538393056 | 0.12482631 |
| 0.687614847 | 0.11375673 |
| 0.226357678 | 0.17653165 |
| 0.660121418 | 0.1275171  |
| 0.569402944 | 0.14513629 |
| 0.366370739 | 0.13424676 |
| 0.122735884 | 0.10573459 |
| 0.376220017 | 0.11720872 |
| 0.516624434 | 0.12869226 |
| 0.282413838 | 0.24041034 |
| 0.283431497 | 0.24927235 |
| 0.340555618 | 0.13953909 |
| 0.616443237 | 0.14965373 |
| 0.461714358 | 0.15241567 |
| 0.178699996 | 0.21174325 |
| 0.226655534 | 0.19483657 |
| 0.666415634 | 0.10774656 |
| 0.178365016 | 0.16310098 |
| 0.599017518 | 0.11323592 |
| 0.381472751 | 0.1287497  |
| 0.373807481 | 0.19853675 |
| 0.343875713 | 0.11987196 |
| 0.381419311 | 0.16217929 |
| 0.465115074 | 0.13973216 |
| 0.204006535 | 0.13365993 |
| 0.459458038 | 0.22193646 |
| 0.244764715 | 0.23649875 |
| 0.71564731  | 0.11769448 |
| 0.598374182 | 0.1634016  |
| 0.64404475  | 0.10839132 |
| 0.587512668 | 0.12672616 |
| 0.427098766 | 0.16512428 |
| 0.520576104 | 0.10324245 |
| 0.436377942 | 0.23577019 |
| 0.086417937 | 0.11683921 |
| 0.496272292 | 0.11724082 |
| 0.479969422 | 0.14115126 |
| 0.532343016 | 0.14620976 |
| 0.571437336 | 0.14899517 |
| 0.666152627 | 0.17941722 |
| 0.135295117 | 0.10079669 |
| 0.386574608 | 0.16180124 |
| 0.338110631 | 0.17560621 |
| 0.366672574 | 0.23002871 |
| 0.218075252 | 0.13529067 |
| 0.506160084 | 0.10880404 |

|             |            |
|-------------|------------|
| 0.405953163 | 0.11583289 |
| 0.57082365  | 0.11882579 |
| 0.484301266 | 0.19017172 |
| 0.349146915 | 0.14388611 |
| 0.556155298 | 0.12251645 |
| 0.338957204 | 0.12829673 |
| 0.76822362  | 0.13054549 |
| 0.42894418  | 0.14431751 |
| 0.736860031 | 0.11232531 |
| 0.72741747  | 0.117482   |
| 0.654799105 | 0.12048115 |
| 0.600869177 | 0.12967311 |
| 0.635616139 | 0.18142458 |
| 0.630853138 | 0.22366414 |
| 0.572157979 | 0.12330175 |
| 0.700923923 | 0.11019039 |
| 0.670980088 | 0.11189734 |
| 0.691360603 | 0.12964315 |
| 0.588117923 | 0.14306767 |
| 0.591524189 | 0.14571028 |
| 0.202414867 | 0.11006505 |
| 0.681719949 | 0.12801225 |
| 0.579721976 | 0.13191573 |
| 0.506089145 | 0.23924273 |
| 0.760321345 | 0.12277244 |
| 0.225107705 | 0.1061168  |
| 0.311211343 | 0.12974511 |
| 0.529224367 | 0.15555577 |
| 0.261988028 | 0.12777283 |
| 0.527389093 | 0.24579811 |
| 0.44711093  | 0.13630519 |
| 0.562526181 | 0.15448316 |
| 0.207010393 | 0.17563301 |
| 0.263357357 | 0.10680449 |
| 0.250776779 | 0.23345595 |
| 0.572526229 | 0.17951259 |
| 0.314709798 | 0.2057913  |
| 0.454424535 | 0.1575457  |
| 0.532013829 | 0.13811022 |
| 0.186525504 | 0.10593802 |
| 0.233876639 | 0.11083414 |
| 0.516264653 | 0.15330898 |
| 0.599610304 | 0.11462612 |
| 0.283892274 | 0.10357671 |
| 0.656221009 | 0.15121313 |
| 0.710937542 | 0.11729194 |



|             |            |
|-------------|------------|
| 0.268442792 | 0.21147036 |
| 0.160348326 | 0.11557871 |
| 0.551232884 | 0.16453154 |
| 0.287698997 | 0.15227149 |
| 0.66789755  | 0.16850698 |
| 0.715303309 | 0.10073459 |
| 0.478393114 | 0.11604628 |
| 0.21681678  | 0.12997479 |
| 0.32856967  | 0.16939646 |
| 0.178512237 | 0.20386404 |
| 0.228850442 | 0.26604178 |
| 0.305237385 | 0.1322106  |
| 0.475097489 | 0.27361902 |
| 0.449420595 | 0.1036033  |
| 0.68942916  | 0.10421354 |
| 0.428638924 | 0.1103643  |
| 0.67589849  | 0.13587024 |
| 0.699425648 | 0.14140772 |
| 0.516659575 | 0.14294935 |
| 0.319198669 | 0.41117731 |
| 0.252506683 | 0.2038968  |
| 0.480747673 | 0.15259542 |
| 0.288126034 | 0.1272987  |
| 0.200858621 | 0.15298776 |
| 0.479934873 | 0.20923884 |
| 0.349514994 | 0.16078122 |
| 0.251715432 | 0.11457931 |
| 0.462718875 | 0.15593211 |
| 0.428910128 | 0.12253543 |
| 0.199682112 | 0.11941536 |
| 0.353374066 | 0.15531142 |
| 0.440388754 | 0.11345345 |
| 0.769904447 | 0.11584472 |
| 0.433786596 | 0.12280502 |
| 0.752277548 | 0.12482127 |
| 0.329850297 | 0.14052804 |
| 0.651693237 | 0.15491333 |
| 0.621940481 | 0.17121714 |
| 0.273747152 | 0.20858904 |
| 0.680222798 | 0.11084418 |
| 0.450753062 | 0.12947219 |
| 0.66370105  | 0.13981979 |
| 0.797569965 | 0.11001783 |
| 0.269191583 | 0.13136308 |
| 0.421484212 | 0.13861614 |
| 0.466427141 | 0.10559551 |

|             |            |
|-------------|------------|
| 0.401045013 | 0.10706097 |
| 0.291110006 | 0.18731159 |
| 0.36695511  | 0.22485969 |
| 0.514183052 | 0.12417643 |
| 0.191342379 | 0.13329099 |
| 0.469447585 | 0.13693849 |
| 0.159289482 | 0.13960587 |
| 0.650240588 | 0.10759401 |
| 0.579035641 | 0.12542188 |
| 0.482956267 | 0.12648229 |
| 0.527253635 | 0.16417047 |
| 0.4657931   | 0.20091312 |
| 0.241727994 | 0.19774843 |
| 0.48992565  | 0.11740868 |
| 0.597286961 | 0.17832078 |
| 0.761233256 | 0.11260021 |
| 0.334350117 | 0.30350445 |
| 0.258147265 | 0.12597321 |
| 0.316747849 | 0.10413255 |
| 0.616635083 | 0.1905704  |
| 0.320525386 | 0.19967491 |
| 0.375610733 | 0.26023387 |
| 0.636915848 | 0.19113727 |
| 0.448778297 | 0.16519462 |
| 0.394479542 | 0.11039138 |
| 0.487845884 | 0.17197444 |
| 0.34910766  | 0.10325543 |
| 0.498987943 | 0.10025621 |
| 0.620279904 | 0.11409717 |
| 0.692344029 | 0.14814509 |
| 0.628980343 | 0.10391404 |
| 0.741816414 | 0.109563   |
| 0.513714395 | 0.15080556 |
| 0.567052092 | 0.12160471 |
| 0.536308733 | 0.12539388 |
| 0.626627368 | 0.11619342 |
| 0.364466266 | 0.13060286 |
| 0.499215358 | 0.16864519 |
| 0.377445715 | 0.20362293 |
| 0.414775087 | 0.10589725 |
| 0.386993149 | 0.11530825 |
| 0.521015003 | 0.24091799 |
| 0.504188579 | 0.12923932 |
| 0.625368384 | 0.12953341 |
| 0.240779618 | 0.10632582 |
| 0.636751031 | 0.14620295 |

|             |            |
|-------------|------------|
| 0.626140664 | 0.1524122  |
| 0.729916192 | 0.11432405 |
| 0.339746744 | 0.14232352 |
| 0.635624681 | 0.10238409 |
| 0.61588651  | 0.1447342  |
| 0.520154937 | 0.1742798  |
| 0.559107299 | 0.15451317 |
| 0.154624495 | 0.11599628 |
| 0.66244329  | 0.14264845 |
| 0.293701138 | 0.16603496 |
| 0.578275959 | 0.14214235 |
| 0.254507696 | 0.16634523 |
| 0.530721026 | 0.12586558 |
| 0.376203324 | 0.17884007 |
| 0.734302093 | 0.11632376 |
| 0.412434759 | 0.11005017 |
| 0.403489148 | 0.17253605 |
| 0.51154732  | 0.21853971 |
| 0.380947729 | 0.11484043 |
| 0.211966194 | 0.14019153 |
| 0.378974041 | 0.11059737 |
| 0.206987005 | 0.10127949 |
| 0.231708887 | 0.10821108 |
| 0.670834287 | 0.13912339 |
| 0.643496071 | 0.16333452 |
| 0.253350128 | 0.12728088 |
| 0.511518164 | 0.12068198 |
| 0.313295592 | 0.14938516 |
| 0.737811255 | 0.10855725 |
| 0.356889981 | 0.21628668 |
| 0.624293405 | 0.12493527 |
| 0.580954283 | 0.13354912 |
| 0.575747765 | 0.14234726 |
| 0.610313567 | 0.17997989 |
| 0.103786401 | 0.12943648 |
| 0.533365406 | 0.14632834 |
| 0.427856956 | 0.18833022 |
| 0.540832457 | 0.12834057 |
| 0.308849877 | 0.13491951 |
| 0.356178509 | 0.14588406 |
| 0.326158293 | 0.1025999  |
| 0.604272575 | 0.17393694 |
| 0.518756711 | 0.16427728 |
| 0.236444699 | 0.16422074 |
| 0.490441007 | 0.26832044 |
| 0.532049537 | 0.10939863 |

|             |            |
|-------------|------------|
| 0.651367196 | 0.14077802 |
| 0.684725719 | 0.16686783 |
| 0.589409968 | 0.11570001 |
| 0.543953938 | 0.15281338 |
| 0.461611265 | 0.17661445 |
| 0.288457554 | 0.12824926 |
| 0.441814853 | 0.12034767 |
| 0.522022506 | 0.16275128 |
| 0.380858692 | 0.12143911 |
| 0.481700975 | 0.15082941 |
| 0.709577227 | 0.11738201 |
| 0.761777542 | 0.15556807 |
| 0.338450141 | 0.16445907 |
| 0.257806029 | 0.12895093 |
| 0.274427293 | 0.14911078 |
| 0.230671683 | 0.16601692 |
| 0.376762526 | 0.14902073 |
| 0.618101857 | 0.12600855 |
| 0.399374964 | 0.12767108 |
| 0.448696646 | 0.15663034 |
| 0.611988398 | 0.1502141  |
| 0.638155687 | 0.20871471 |
| 0.659408508 | 0.13185048 |
| 0.525825468 | 0.19697705 |
| 0.418772976 | 0.25897728 |
| 0.569535769 | 0.11763009 |
| 0.638411226 | 0.16274972 |
| 0.570071218 | 0.1922484  |
| 0.180836851 | 0.14326654 |
| 0.358988246 | 0.12120231 |
| 0.392895448 | 0.14095125 |
| 0.64565631  | 0.11820964 |
| 0.206808402 | 0.1105459  |
| 0.584641393 | 0.12495265 |
| 0.661501162 | 0.12613126 |
| 0.581603493 | 0.11916979 |
| 0.398376607 | 0.22213363 |
| 0.610250232 | 0.11299418 |
| 0.161422895 | 0.10540056 |
| 0.210511313 | 0.11025824 |
| 0.603299565 | 0.13223156 |
| 0.603322663 | 0.10224614 |
| 0.323938759 | 0.12179719 |
| 0.612647709 | 0.10283822 |
| 0.526739603 | 0.13363498 |
| 0.512345327 | 0.19262274 |

|             |            |
|-------------|------------|
| 0.446821018 | 0.12110517 |
| 0.636679894 | 0.18149361 |
| 0.168889522 | 0.10189968 |
| 0.123897198 | 0.13066358 |
| 0.62588571  | 0.14119371 |
| 0.458681906 | 0.15451117 |
| 0.664522684 | 0.17954202 |
| 0.407210702 | 0.15095848 |
| 0.233439105 | 0.13703698 |
| 0.204538408 | 0.11007599 |
| 0.380492918 | 0.1145765  |
| 0.430121395 | 0.14060505 |
| 0.237399103 | 0.14757579 |
| 0.720996156 | 0.12590125 |
| 0.174761441 | 0.14042987 |
| 0.167059379 | 0.16130992 |
| 0.468872868 | 0.20652853 |
| 0.687888642 | 0.11724567 |
| 0.559143606 | 0.10411359 |
| 0.777351481 | 0.10880461 |
| 0.564896844 | 0.16080806 |
| 0.326519576 | 0.28246003 |
| 0.242487096 | 0.13973118 |
| 0.155254034 | 0.14569299 |
| 0.665044294 | 0.15004849 |
| 0.618888882 | 0.18306078 |
| 0.189385795 | 0.1061896  |
| 0.268404611 | 0.11112948 |
| 0.339090562 | 0.26684884 |
| 0.632136284 | 0.10195967 |
| 0.728638506 | 0.11144514 |
| 0.604994376 | 0.16559138 |
| 0.484324725 | 0.18516101 |
| 0.634570701 | 0.12030908 |
| 0.357029823 | 0.13024017 |
| 0.391744442 | 0.10335055 |
| 0.396803713 | 0.14304836 |
| 0.313684766 | 0.14194937 |
| 0.493110384 | 0.160713   |
| 0.471115069 | 0.18421131 |
| 0.404967949 | 0.15927417 |
| 0.217540404 | 0.2417935  |
| 0.509172864 | 0.15433431 |
| 0.516640618 | 0.1117116  |
| 0.700867153 | 0.17572184 |
| 0.578984805 | 0.208713   |

|             |            |
|-------------|------------|
| 0.280764047 | 0.10035111 |
| 0.262381275 | 0.11116022 |
| 0.701947315 | 0.12270731 |
| 0.532271712 | 0.14158632 |
| 0.631239015 | 0.11895662 |
| 0.696084477 | 0.10482229 |
| 0.536195954 | 0.1159672  |
| 0.67660728  | 0.13673922 |
| 0.467815824 | 0.32543957 |
| 0.589916271 | 0.11876761 |
| 0.654643875 | 0.12369687 |
| 0.397276725 | 0.15819272 |
| 0.301816739 | 0.19131714 |
| 0.462367018 | 0.10903236 |
| 0.668827195 | 0.1021158  |
| 0.441669422 | 0.14961167 |
| 0.248874824 | 0.1749514  |
| 0.558702378 | 0.13621161 |
| 0.450508735 | 0.14202683 |
| 0.12023228  | 0.11055338 |
| 0.189422684 | 0.11915373 |
| 0.363532799 | 0.19305888 |
| 0.273578403 | 0.22871443 |
| 0.576254557 | 0.13393003 |
| 0.161629133 | 0.15252814 |
| 0.509563166 | 0.18471549 |
| 0.272792084 | 0.22796985 |
| 0.456721471 | 0.16010265 |
| 0.41444696  | 0.13464196 |
| 0.605702903 | 0.15783623 |
| 0.68527249  | 0.1174331  |
| 0.673934956 | 0.12904132 |
| 0.560809761 | 0.14899889 |
| 0.656956109 | 0.11980565 |
| 0.754379488 | 0.10605774 |
| 0.596768975 | 0.1423612  |
| 0.410089238 | 0.14075609 |
| 0.575045546 | 0.13601698 |
| 0.45197248  | 0.15768571 |
| 0.415027081 | 0.10524403 |
| 0.257791055 | 0.14943098 |
| 0.455600524 | 0.17174151 |
| 0.231082353 | 0.17698136 |
| 0.304891911 | 0.17291466 |
| 0.559604919 | 0.13616579 |
| 0.386632199 | 0.12275629 |

|             |            |
|-------------|------------|
| 0.698849977 | 0.12804955 |
| 0.356259123 | 0.15396032 |
| 0.172704838 | 0.11912107 |
| 0.172626186 | 0.10459233 |
| 0.259506112 | 0.10724391 |
| 0.312465988 | 0.12457389 |
| 0.552006095 | 0.15493552 |
| 0.36109511  | 0.17770357 |
| 0.289323723 | 0.13861909 |
| 0.293795208 | 0.10461002 |
| 0.263430161 | 0.17343472 |
| 0.433616688 | 0.12231369 |
| 0.504720287 | 0.17142824 |
| 0.574473047 | 0.16850906 |
| 0.131515851 | 0.14041014 |
| 0.517764373 | 0.10131844 |
| 0.4502041   | 0.16814104 |
| 0.425696922 | 0.12604792 |
| 0.342408349 | 0.14926671 |
| 0.190100819 | 0.1220365  |
| 0.757859632 | 0.11961837 |
| 0.728758986 | 0.10737089 |
| 0.3504706   | 0.2051876  |
| 0.443522894 | 0.17686396 |
| 0.710064892 | 0.14358474 |
| 0.160931825 | 0.15831131 |
| 0.405119002 | 0.13631409 |
| 0.548103334 | 0.16496233 |
| 0.290110882 | 0.19540823 |
| 0.369123596 | 0.16429539 |
| 0.593712696 | 0.16951896 |
| 0.565730596 | 0.22494083 |
| 0.65953362  | 0.10714913 |
| 0.282513043 | 0.12706754 |
| 0.193855749 | 0.11466604 |
| 0.340773641 | 0.14926722 |
| 0.349922697 | 0.28944125 |
| 0.420999912 | 0.12032419 |
| 0.546723464 | 0.11671932 |
| 0.697393565 | 0.10318871 |
| 0.73933858  | 0.11280338 |
| 0.183439357 | 0.13143505 |
| 0.508704646 | 0.18971358 |
| 0.717562805 | 0.10487393 |
| 0.621630213 | 0.16199825 |
| 0.725860803 | 0.11492588 |

|             |            |
|-------------|------------|
| 0.624666621 | 0.12579421 |
| 0.645407167 | 0.13209172 |
| 0.545896681 | 0.15683083 |
| 0.353984442 | 0.17053801 |
| 0.634578024 | 0.17406339 |
| 0.532693155 | 0.18451801 |
| 0.468060567 | 0.20301723 |
| 0.498341741 | 0.21094713 |
| 0.22356959  | 0.22352023 |
| 0.368523315 | 0.13682878 |
| 0.702599087 | 0.11014243 |
| 0.446473272 | 0.12634792 |
| 0.228013663 | 0.30661004 |
| 0.612566963 | 0.11759569 |
| 0.309068006 | 0.11964607 |
| 0.767637552 | 0.14104812 |
| 0.228606038 | 0.10745881 |
| 0.405715226 | 0.19115569 |
| 0.188695123 | 0.17393023 |
| 0.350812386 | 0.12285032 |
| 0.629561336 | 0.12356716 |
| 0.298197269 | 0.12028164 |
| 0.237097412 | 0.10689377 |
| 0.451122417 | 0.20732272 |
| 0.209477799 | 0.11078024 |
| 0.602199842 | 0.13656916 |
| 0.536638088 | 0.13921414 |
| 0.479185187 | 0.13144404 |
| 0.732783476 | 0.1103212  |
| 0.157505305 | 0.11302063 |
| 0.672223091 | 0.12719303 |
| 0.287206165 | 0.10562151 |
| 0.550397334 | 0.18704295 |
| 0.409757159 | 0.2214216  |
| 0.31879402  | 0.31308636 |
| 0.354217218 | 0.13955648 |
| 0.486159972 | 0.10665792 |
| 0.095761746 | 0.11997426 |
| 0.659413604 | 0.16081938 |
| 0.473361226 | 0.25329961 |
| 0.426395588 | 0.13692179 |
| 0.457739617 | 0.12297014 |
| 0.662040946 | 0.16729529 |
| 0.161608825 | 0.14105667 |
| 0.702055823 | 0.14400515 |
| 0.619728075 | 0.10753389 |



|             |            |
|-------------|------------|
| 0.681900442 | 0.12419088 |
| 0.621282904 | 0.20438977 |
| 0.175577658 | 0.10367812 |
| 0.546046484 | 0.11404204 |
| 0.409332115 | 0.10015389 |
| 0.410373598 | 0.13244883 |
| 0.292369677 | 0.11206545 |
| 0.705310967 | 0.19262208 |
| 0.65137866  | 0.12584486 |
| 0.575831895 | 0.16699286 |
| 0.194724323 | 0.13436536 |
| 0.590808149 | 0.10790675 |
| 0.097683421 | 0.10560615 |
| 0.7275509   | 0.10431113 |
| 0.741994379 | 0.14233162 |
| 0.618746667 | 0.14135978 |
| 0.59268298  | 0.18146196 |
| 0.514406131 | 0.16476168 |
| 0.444007015 | 0.19821435 |
| 0.186901409 | 0.10004062 |
| 0.203978121 | 0.10313691 |
| 0.228118427 | 0.21001593 |
| 0.693523834 | 0.13237684 |
| 0.686409804 | 0.16112426 |
| 0.580322133 | 0.17034897 |
| 0.410145423 | 0.14218523 |
| 0.498041709 | 0.1573375  |
| 0.451454385 | 0.14321987 |
| 0.625791457 | 0.15541401 |
| 0.344406423 | 0.11165457 |
| 0.388887215 | 0.14963539 |
| 0.726717072 | 0.14745488 |
| 0.567161177 | 0.10030675 |
| 0.766819574 | 0.1155654  |
| 0.508156651 | 0.1250263  |
| 0.73829297  | 0.13307217 |
| 0.499820916 | 0.12467347 |
| 0.582197456 | 0.12722776 |
| 0.225324294 | 0.22720491 |
| 0.417612699 | 0.11515524 |
| 0.481373195 | 0.11634967 |
| 0.551651528 | 0.12856063 |
| 0.574986684 | 0.13054995 |
| 0.519047182 | 0.27178547 |
| 0.46913979  | 0.19809713 |
| 0.408774453 | 0.2077266  |

|             |            |
|-------------|------------|
| 0.187769291 | 0.10063798 |
| 0.500419946 | 0.10268796 |
| 0.19661492  | 0.12575108 |
| 0.305861393 | 0.14658315 |
| 0.397839587 | 0.11633044 |
| 0.542415475 | 0.11168582 |
| 0.215278404 | 0.18897804 |
| 0.588134785 | 0.10175925 |
| 0.674474472 | 0.1121074  |
| 0.655035167 | 0.13208566 |
| 0.491404105 | 0.12136878 |
| 0.408186738 | 0.10052949 |
| 0.317459097 | 0.17839926 |
| 0.361724847 | 0.16363387 |
| 0.638795598 | 0.13534111 |
| 0.332281229 | 0.22050184 |
| 0.324264131 | 0.12820681 |
| 0.3385011   | 0.28517628 |
| 0.629754551 | 0.15290429 |
| 0.46865155  | 0.11636955 |
| 0.438997588 | 0.15428616 |
| 0.504286214 | 0.15765251 |
| 0.253686309 | 0.11191026 |
| 0.590608148 | 0.15638709 |
| 0.481332311 | 0.13000652 |
| 0.704504269 | 0.12440219 |
| 0.607781524 | 0.13499346 |
| 0.28559416  | 0.16826354 |
| 0.36810713  | 0.12600988 |
| 0.375008186 | 0.17017541 |
| 0.628185165 | 0.1272124  |
| 0.646516311 | 0.1820146  |
| 0.540135031 | 0.14595844 |
| 0.604555882 | 0.11177205 |
| 0.544133769 | 0.11223226 |
| 0.764067441 | 0.13175851 |
| 0.602822638 | 0.18035591 |
| 0.730371586 | 0.10364693 |
| 0.692400443 | 0.10610064 |
| 0.31181816  | 0.12976139 |
| 0.288405235 | 0.10609358 |
| 0.543922289 | 0.21107055 |
| 0.707969069 | 0.10255151 |
| 0.334478635 | 0.11255353 |
| 0.629986988 | 0.12798401 |
| 0.523270147 | 0.11772991 |

|             |            |
|-------------|------------|
| 0.635619858 | 0.15931975 |
| 0.360550934 | 0.18917418 |
| 0.584608991 | 0.20675496 |
| 0.522551959 | 0.21634375 |
| 0.52769931  | 0.1317842  |
| 0.495095598 | 0.11276296 |
| 0.574006549 | 0.2113095  |
| 0.388324566 | 0.16531309 |
| 0.358856305 | 0.11043247 |
| 0.452163237 | 0.10058325 |
| 0.379870369 | 0.11940614 |
| 0.450749414 | 0.13419411 |
| 0.451292299 | 0.12114327 |
| 0.579148324 | 0.13375634 |
| 0.704249647 | 0.1066082  |
| 0.348779825 | 0.21379371 |
| 0.360069368 | 0.13627742 |
| 0.328458626 | 0.13215998 |
| 0.641324727 | 0.13927409 |
| 0.495984335 | 0.13047706 |
| 0.365473141 | 0.16690275 |
| 0.091877661 | 0.35381574 |
| 0.350308955 | 0.11622586 |
| 0.541983269 | 0.17698169 |
| 0.589311463 | 0.12999687 |
| 0.304362517 | 0.13004262 |
| 0.473116362 | 0.13244617 |
| 0.639927225 | 0.14941274 |
| 0.64655374  | 0.13994777 |
| 0.34745964  | 0.16548653 |
| 0.606093507 | 0.19067805 |
| 0.772199211 | 0.11365031 |
| 0.442202155 | 0.11818144 |
| 0.208296361 | 0.10152752 |
| 0.631071199 | 0.18157495 |
| 0.497017968 | 0.11427347 |
| 0.516070165 | 0.1669934  |
| 0.580446321 | 0.23587286 |
| 0.459196792 | 0.24602637 |
| 0.704190091 | 0.11441059 |
| 0.565927293 | 0.16037268 |
| 0.705034478 | 0.10424256 |
| 0.379415703 | 0.12178976 |
| 0.185669533 | 0.12797717 |
| 0.533886742 | 0.28310933 |
| 0.228823835 | 0.11121493 |

|             |            |
|-------------|------------|
| 0.71414894  | 0.13344387 |
| 0.61172802  | 0.16392834 |
| 0.624661173 | 0.19897118 |
| 0.309681839 | 0.13320367 |
| 0.491867392 | 0.16380481 |
| 0.348468184 | 0.10432916 |
| 0.488941704 | 0.11429585 |
| 0.590484713 | 0.1017098  |
| 0.633181844 | 0.11948969 |
| 0.381358379 | 0.12691793 |
| 0.363482203 | 0.12729367 |
| 0.19855868  | 0.19897906 |
| 0.191608427 | 0.135958   |
| 0.298942075 | 0.15357443 |
| 0.573097429 | 0.10266399 |
| 0.367028879 | 0.14028465 |
| 0.661677854 | 0.11083495 |
| 0.453456547 | 0.15874606 |
| 0.116124269 | 0.13064451 |
| 0.347088714 | 0.19343497 |
| 0.303367272 | 0.10540848 |
| 0.378369933 | 0.16782668 |
| 0.418502712 | 0.24831943 |
| 0.690578104 | 0.10011159 |
| 0.323757783 | 0.12454882 |
| 0.486637971 | 0.14859617 |
| 0.336413746 | 0.10138201 |
| 0.360337514 | 0.10723142 |
| 0.576782688 | 0.13933963 |
| 0.562192103 | 0.13530479 |
| 0.246866376 | 0.18778393 |
| 0.345551585 | 0.12506077 |
| 0.42392977  | 0.18726299 |
| 0.631288968 | 0.1206705  |
| 0.199972557 | 0.1664614  |
| 0.144058798 | 0.13133356 |
| 0.674584638 | 0.15449454 |
| 0.272640825 | 0.1595059  |
| 0.256534213 | 0.10683609 |
| 0.218041525 | 0.14426996 |
| 0.51890265  | 0.14196709 |
| 0.457518548 | 0.16538279 |
| 0.397252538 | 0.17942541 |
| 0.71660351  | 0.11135623 |
| 0.275777421 | 0.14056746 |
| 0.103688618 | 0.1103396  |

|             |            |
|-------------|------------|
| 0.63089044  | 0.15649395 |
| 0.528040199 | 0.17224482 |
| 0.445198788 | 0.16354519 |
| 0.263959249 | 0.15557396 |
| 0.243404676 | 0.14681878 |
| 0.374459052 | 0.14750769 |
| 0.243323472 | 0.15786343 |
| 0.354101295 | 0.18277631 |
| 0.195971169 | 0.10515352 |
| 0.344446304 | 0.10687169 |
| 0.306332687 | 0.11341675 |
| 0.332655325 | 0.25900182 |
| 0.577279549 | 0.16924919 |
| 0.16449734  | 0.10382845 |
| 0.599391666 | 0.11108814 |
| 0.665602586 | 0.11846487 |
| 0.267578943 | 0.12076147 |
| 0.576797824 | 0.10983783 |
| 0.58670526  | 0.1650603  |
| 0.699150788 | 0.13423123 |
| 0.614884756 | 0.15003148 |
| 0.525252224 | 0.113      |
| 0.362228269 | 0.11668228 |
| 0.216475493 | 0.10497926 |
| 0.231353842 | 0.12409637 |
| 0.247963515 | 0.11637415 |
| 0.51956127  | 0.12919534 |
| 0.237521266 | 0.17482746 |
| 0.398996965 | 0.1163123  |
| 0.606571244 | 0.12132593 |
| 0.680919961 | 0.11204383 |
| 0.687249172 | 0.11771276 |
| 0.416393595 | 0.18301642 |
| 0.219603441 | 0.1839884  |
| 0.593817996 | 0.13437602 |
| 0.696362466 | 0.10028806 |
| 0.264169172 | 0.12876004 |
| 0.394684264 | 0.14673212 |
| 0.294287339 | 0.14951894 |
| 0.458869281 | 0.12926908 |
| 0.570522337 | 0.11572772 |
| 0.679936002 | 0.1193489  |
| 0.172573665 | 0.12863783 |
| 0.432176122 | 0.15492385 |
| 0.482602475 | 0.16263563 |
| 0.186162536 | 0.24555662 |

|             |            |
|-------------|------------|
| 0.203866293 | 0.29143912 |
| 0.235411896 | 0.1253034  |
| 0.447973179 | 0.12402853 |
| 0.655289214 | 0.12804022 |
| 0.497925162 | 0.13080923 |
| 0.545987682 | 0.10958588 |
| 0.374788911 | 0.10082593 |
| 0.481913339 | 0.11009112 |
| 0.736701928 | 0.10341813 |
| 0.091979299 | 0.10180535 |
| 0.23948078  | 0.16793668 |
| 0.232437199 | 0.18505837 |
| 0.441833569 | 0.17982654 |
| 0.567004476 | 0.1077166  |
| 0.468697202 | 0.10384118 |
| 0.066377457 | 0.12494077 |
| 0.096083529 | 0.22989945 |
| 0.387704149 | 0.30865095 |
| 0.492971594 | 0.21784221 |
| 0.471240724 | 0.16992696 |
| 0.490301389 | 0.17946641 |
| 0.612400487 | 0.16287304 |
| 0.708093126 | 0.10489993 |
| 0.608945393 | 0.15601048 |
| 0.594734898 | 0.1127609  |
| 0.223559406 | 0.12082491 |
| 0.285080269 | 0.12433571 |
| 0.326800662 | 0.11216601 |
| 0.532818901 | 0.18959526 |
| 0.418153797 | 0.11934078 |
| 0.479960701 | 0.16880629 |
| 0.679803533 | 0.11418566 |
| 0.540477284 | 0.24563226 |
| 0.674710165 | 0.17210801 |
| 0.488578968 | 0.16825768 |
| 0.582211815 | 0.12962241 |
| 0.161670137 | 0.1293326  |
| 0.486070653 | 0.16478835 |
| 0.686206456 | 0.11823872 |
| 0.473316167 | 0.1634834  |
| 0.109907158 | 0.16713869 |
| 0.186733595 | 0.10323712 |
| 0.268439147 | 0.11184304 |
| 0.393494529 | 0.11327773 |
| 0.366342515 | 0.14214049 |
| 0.279907846 | 0.10694932 |

|             |            |
|-------------|------------|
| 0.385000276 | 0.10596497 |
| 0.761620591 | 0.1183971  |
| 0.649868243 | 0.10442535 |
| 0.687378476 | 0.11033467 |
| 0.693697743 | 0.11745187 |
| 0.576844115 | 0.15830762 |
| 0.626692654 | 0.15930313 |
| 0.438731441 | 0.20277489 |
| 0.466155344 | 0.12549499 |
| 0.594888519 | 0.10835294 |
| 0.669012219 | 0.133419   |
| 0.719842554 | 0.14155055 |
| 0.403979758 | 0.101998   |
| 0.486982363 | 0.1942271  |
| 0.48126996  | 0.11192675 |
| 0.293623896 | 0.13457395 |
| 0.291224093 | 0.13828821 |
| 0.383038106 | 0.1063804  |
| 0.463253973 | 0.13213642 |
| 0.540158252 | 0.13030423 |
| 0.648449444 | 0.12524126 |
| 0.504818827 | 0.10331369 |
| 0.696287241 | 0.10259778 |
| 0.435541652 | 0.14571718 |
| 0.428910917 | 0.25690682 |
| 0.681452196 | 0.11173648 |
| 0.671249757 | 0.15272113 |
| 0.406933261 | 0.12673829 |
| 0.337859708 | 0.14879719 |
| 0.403528727 | 0.13118023 |
| 0.537323326 | 0.10802392 |
| 0.525157638 | 0.11225539 |
| 0.216451894 | 0.12378989 |
| 0.638041729 | 0.12426685 |
| 0.31919329  | 0.19342808 |
| 0.264988067 | 0.13898705 |
| 0.580174252 | 0.14825109 |
| 0.489537405 | 0.22912331 |
| 0.342446243 | 0.15304417 |
| 0.303868163 | 0.16513477 |
| 0.339923059 | 0.12968651 |
| 0.261231588 | 0.10967857 |
| 0.375259001 | 0.13627815 |
| 0.63813807  | 0.11112731 |
| 0.159363185 | 0.10866252 |
| 0.441095231 | 0.15624733 |

|             |            |
|-------------|------------|
| 0.529753683 | 0.14341432 |
| 0.68791153  | 0.13809639 |
| 0.303964147 | 0.15349148 |
| 0.569715174 | 0.14987082 |
| 0.188921643 | 0.13195025 |
| 0.269655113 | 0.13376208 |
| 0.419889854 | 0.17263671 |
| 0.16775375  | 0.10719497 |
| 0.381266175 | 0.14816487 |
| 0.373318446 | 0.12470688 |
| 0.685971499 | 0.10854206 |
| 0.546665983 | 0.17298597 |
| 0.549718714 | 0.18150128 |
| 0.590077582 | 0.20212939 |
| 0.614426137 | 0.13687591 |
| 0.233426175 | 0.15343779 |
| 0.622892652 | 0.16644152 |
| 0.633873339 | 0.10532919 |
| 0.56533583  | 0.12313161 |
| 0.446190637 | 0.13160767 |
| 0.538413873 | 0.10433548 |
| 0.353088284 | 0.13983661 |
| 0.613612235 | 0.16106236 |
| 0.556555918 | 0.19850534 |
| 0.264630696 | 0.11489407 |
| 0.316829534 | 0.11151181 |
| 0.562393838 | 0.15518529 |
| 0.181731201 | 0.13856225 |
| 0.607594252 | 0.1881098  |
| 0.590060687 | 0.15969054 |
| 0.702997991 | 0.1551149  |
| 0.39834443  | 0.13550183 |
| 0.369569067 | 0.14529592 |
| 0.564073453 | 0.1747392  |
| 0.478958112 | 0.23590753 |
| 0.594967199 | 0.18867905 |
| 0.505987343 | 0.15627127 |
| 0.57956194  | 0.10778805 |
| 0.363573511 | 0.10147531 |
| 0.31903693  | 0.11941154 |
| 0.677362533 | 0.12119452 |
| 0.590982117 | 0.16587152 |
| 0.324510121 | 0.19706714 |
| 0.307055342 | 0.10881522 |
| 0.527527727 | 0.1144419  |
| 0.517036392 | 0.13873467 |



|             |            |
|-------------|------------|
| 0.506349547 | 0.18419408 |
| 0.25101061  | 0.15600483 |
| 0.341639005 | 0.21115784 |
| 0.283943906 | 0.14557649 |
| 0.54342967  | 0.15919925 |
| 0.768921824 | 0.1237397  |
| 0.527168904 | 0.12026775 |
| 0.632504081 | 0.15022459 |
| 0.481904219 | 0.19970262 |
| 0.421934583 | 0.21115249 |
| 0.223038501 | 0.13915715 |
| 0.176341155 | 0.10884034 |
| 0.63917451  | 0.16177488 |
| 0.707745838 | 0.10602444 |
| 0.713114719 | 0.12072503 |
| 0.661129496 | 0.1594691  |
| 0.56920089  | 0.16129726 |
| 0.445763237 | 0.26530437 |
| 0.115245668 | 0.11146325 |
| 0.508588001 | 0.25983971 |
| 0.297990102 | 0.14930908 |
| 0.314310016 | 0.18457821 |
| 0.306044625 | 0.15459138 |
| 0.351938899 | 0.1282062  |
| 0.671019172 | 0.10302924 |
| 0.704891246 | 0.11597948 |
| 0.259588986 | 0.12914134 |
| 0.27864363  | 0.23597223 |
| 0.661996269 | 0.11563916 |
| 0.762839869 | 0.14483312 |
| 0.345420854 | 0.14036563 |
| 0.431506434 | 0.12187521 |
| 0.58873685  | 0.16231163 |
| 0.604674701 | 0.13656116 |
| 0.485685521 | 0.1534746  |
| 0.568121998 | 0.14058087 |
| 0.60969888  | 0.15293364 |
| 0.570535581 | 0.18936115 |
| 0.5844177   | 0.20128151 |
| 0.538468844 | 0.21412214 |
| 0.615758975 | 0.12587311 |
| 0.540133053 | 0.13858855 |
| 0.314120432 | 0.11498328 |
| 0.474182489 | 0.16346089 |
| 0.317951037 | 0.18771201 |
| 0.599418322 | 0.11418203 |

|             |            |
|-------------|------------|
| 0.673081055 | 0.12361795 |
| 0.67981613  | 0.12372906 |
| 0.411318805 | 0.13456067 |
| 0.48199318  | 0.13688361 |
| 0.200939035 | 0.11481828 |
| 0.475550082 | 0.1334331  |
| 0.485718766 | 0.10688769 |
| 0.340914194 | 0.10064675 |
| 0.463304388 | 0.13323622 |
| 0.346959815 | 0.14050094 |
| 0.603575199 | 0.1490439  |
| 0.552197168 | 0.16049264 |
| 0.242340812 | 0.23638141 |
| 0.60063813  | 0.11745861 |
| 0.610563916 | 0.14690363 |
| 0.291425065 | 0.18086951 |
| 0.112989855 | 0.12735979 |
| 0.484462642 | 0.11092312 |
| 0.566736524 | 0.13937309 |
| 0.697562929 | 0.1034053  |
| 0.453294622 | 0.18205267 |
| 0.211239596 | 0.14359073 |
| 0.617065799 | 0.11313254 |
| 0.294088868 | 0.15139305 |
| 0.248088072 | 0.14913377 |
| 0.296043478 | 0.28944071 |
| 0.364591849 | 0.21482581 |
| 0.19679834  | 0.10309832 |
| 0.631965067 | 0.13289497 |
| 0.683711002 | 0.18021844 |
| 0.276970039 | 0.13925739 |
| 0.481392347 | 0.10891917 |
| 0.336856918 | 0.1226387  |
| 0.269643581 | 0.14452198 |
| 0.540336012 | 0.21632167 |
| 0.471045379 | 0.24240834 |
| 0.44698129  | 0.1070074  |
| 0.55009336  | 0.12411386 |
| 0.658381836 | 0.12349952 |
| 0.421642866 | 0.10841953 |
| 0.613880284 | 0.11597836 |
| 0.601758864 | 0.12844585 |
| 0.555440146 | 0.15934594 |
| 0.602752701 | 0.162097   |
| 0.432418566 | 0.16788294 |
| 0.582558655 | 0.18186588 |

|             |            |
|-------------|------------|
| 0.641707377 | 0.20379488 |
| 0.268331446 | 0.21071417 |
| 0.683398076 | 0.13479765 |
| 0.34398242  | 0.11429714 |
| 0.293935452 | 0.1564056  |
| 0.597987756 | 0.17357005 |
| 0.359782688 | 0.11294828 |
| 0.401337515 | 0.13181478 |
| 0.684143487 | 0.13777143 |
| 0.299637579 | 0.16235908 |
| 0.365055402 | 0.11651067 |
| 0.392318564 | 0.12210327 |
| 0.669981882 | 0.11605846 |
| 0.734500213 | 0.15378998 |
| 0.547504805 | 0.17871586 |
| 0.662879876 | 0.18801207 |
| 0.247132741 | 0.10734622 |
| 0.301969819 | 0.13153882 |
| 0.543678567 | 0.13363011 |
| 0.578106037 | 0.13416982 |
| 0.383614199 | 0.19643267 |
| 0.475260302 | 0.24065615 |
| 0.698045372 | 0.11725502 |
| 0.753103073 | 0.10078282 |
| 0.732299124 | 0.11524174 |
| 0.602207653 | 0.12576942 |
| 0.383298537 | 0.11356377 |
| 0.580770624 | 0.15043757 |
| 0.309405516 | 0.16186184 |
| 0.200438668 | 0.18358081 |
| 0.320129661 | 0.14891675 |
| 0.435176008 | 0.2007543  |
| 0.674606037 | 0.16128234 |
| 0.602935779 | 0.13389988 |
| 0.445118959 | 0.14272211 |
| 0.514931513 | 0.16782813 |
| 0.512795987 | 0.10717436 |
| 0.362435206 | 0.1173625  |
| 0.267656022 | 0.16659099 |
| 0.515958011 | 0.11592183 |
| 0.443323576 | 0.10011875 |
| 0.615889094 | 0.10353255 |
| 0.64062997  | 0.11487543 |
| 0.424040763 | 0.11724697 |
| 0.693326692 | 0.16343704 |
| 0.725991801 | 0.10526886 |

|             |            |
|-------------|------------|
| 0.113032396 | 0.11619999 |
| 0.596729063 | 0.11708435 |
| 0.315381818 | 0.19219794 |
| 0.368464437 | 0.14201164 |
| 0.661244016 | 0.11178433 |
| 0.196527348 | 0.10088898 |
| 0.28900919  | 0.1208499  |
| 0.555517281 | 0.12371743 |
| 0.387880972 | 0.11699828 |
| 0.446214324 | 0.1399029  |
| 0.225631645 | 0.10644716 |
| 0.60889375  | 0.10810456 |
| 0.548435706 | 0.11651183 |
| 0.273835776 | 0.14564486 |
| 0.441821699 | 0.18168364 |
| 0.494887533 | 0.17161364 |
| 0.350640209 | 0.23654837 |
| 0.67437109  | 0.15052215 |
| 0.643021018 | 0.19855864 |
| 0.555754896 | 0.23553495 |
| 0.430208642 | 0.27947418 |
| 0.429646999 | 0.33056394 |
| 0.618624602 | 0.17835153 |
| 0.564576064 | 0.10800012 |
| 0.44676255  | 0.13885079 |
| 0.358606348 | 0.1269049  |
| 0.439763228 | 0.15242776 |
| 0.226617192 | 0.1289411  |
| 0.341396175 | 0.10695633 |
| 0.725245332 | 0.15671432 |
| 0.367208225 | 0.11987184 |
| 0.381678408 | 0.12388117 |
| 0.548521073 | 0.24676377 |
| 0.360015265 | 0.29216944 |
| 0.589032998 | 0.13264723 |
| 0.642455008 | 0.14278804 |
| 0.610729993 | 0.10558897 |
| 0.249785061 | 0.2045721  |
| 0.124558699 | 0.11250351 |
| 0.65182839  | 0.1057166  |
| 0.770800286 | 0.11669224 |
| 0.636813687 | 0.16336646 |
| 0.410716076 | 0.17680871 |
| 0.473806444 | 0.19256148 |
| 0.400110781 | 0.22728069 |
| 0.44406908  | 0.20069641 |

|             |            |
|-------------|------------|
| 0.39217347  | 0.334597   |
| 0.232786567 | 0.11132621 |
| 0.73887797  | 0.11234323 |
| 0.363207507 | 0.26290631 |
| 0.458726785 | 0.12644616 |
| 0.734392972 | 0.10393137 |
| 0.595276158 | 0.12711484 |
| 0.48464102  | 0.16149217 |
| 0.660722175 | 0.16520954 |
| 0.566345031 | 0.19420518 |
| 0.464819542 | 0.24934389 |
| 0.273220349 | 0.31645402 |
| 0.180971207 | 0.1151954  |
| 0.27664543  | 0.17330071 |
| 0.407759121 | 0.2102777  |
| 0.29583582  | 0.11406627 |
| 0.489433507 | 0.20057833 |
| 0.581613263 | 0.10460779 |
| 0.400385152 | 0.21979873 |
| 0.15728928  | 0.17622511 |
| 0.160934426 | 0.130614   |
| 0.270627548 | 0.16349042 |
| 0.510060888 | 0.13145428 |
| 0.378899805 | 0.16840306 |
| 0.386842634 | 0.13140676 |
| 0.504945931 | 0.15857209 |
| 0.246633017 | 0.10987629 |
| 0.376824403 | 0.12426921 |
| 0.499488845 | 0.14473856 |
| 0.378731714 | 0.14731466 |
| 0.468532769 | 0.15385958 |
| 0.266419475 | 0.10755825 |
| 0.334864388 | 0.22763931 |
| 0.40966324  | 0.13435735 |
| 0.342775237 | 0.10675611 |
| 0.667801395 | 0.10464673 |
| 0.386292709 | 0.1318288  |
| 0.511884616 | 0.17974688 |
| 0.681705527 | 0.1033752  |
| 0.488346042 | 0.10693051 |
| 0.665464542 | 0.12789142 |
| 0.419495124 | 0.16330349 |
| 0.607562732 | 0.13874725 |
| 0.542226119 | 0.13143069 |
| 0.278125803 | 0.10241906 |
| 0.346355631 | 0.14884624 |

|             |            |
|-------------|------------|
| 0.437477589 | 0.14270168 |
| 0.317276395 | 0.15067328 |
| 0.657711831 | 0.16792124 |
| 0.227767034 | 0.10080593 |
| 0.312055572 | 0.10494428 |
| 0.206677009 | 0.10624587 |
| 0.345872671 | 0.17379534 |
| 0.122816104 | 0.11889325 |
| 0.38465941  | 0.19574403 |
| 0.24258941  | 0.20559348 |
| 0.609057202 | 0.10132723 |
| 0.30062929  | 0.11352904 |
| 0.69547535  | 0.16278562 |
| 0.298417609 | 0.12438458 |
| 0.492914433 | 0.14686826 |
| 0.434377536 | 0.21816545 |
| 0.541761707 | 0.1205539  |
| 0.54616077  | 0.19592368 |
| 0.6173587   | 0.10805088 |
| 0.289126009 | 0.24566221 |
| 0.258186811 | 0.14436902 |
| 0.729724435 | 0.13688    |
| 0.40716585  | 0.13455231 |
| 0.184842043 | 0.17196947 |
| 0.217104566 | 0.13947793 |
| 0.570842748 | 0.10442858 |
| 0.603796981 | 0.14665299 |
| 0.692458091 | 0.10854742 |
| 0.652173514 | 0.1533205  |
| 0.626647429 | 0.1010764  |
| 0.232164035 | 0.11102701 |
| 0.688246468 | 0.12452015 |
| 0.551004357 | 0.13065925 |
| 0.192781173 | 0.11949935 |
| 0.494873671 | 0.21262185 |
| 0.617640927 | 0.13314892 |
| 0.414774481 | 0.14622072 |
| 0.219628415 | 0.13010348 |
| 0.305309461 | 0.21314134 |
| 0.650099862 | 0.11322933 |
| 0.463026196 | 0.173752   |
| 0.353030881 | 0.1276567  |
| 0.458213707 | 0.12810555 |
| 0.545742764 | 0.14554686 |
| 0.484388162 | 0.13583211 |
| 0.611940911 | 0.12303543 |

|             |            |
|-------------|------------|
| 0.564919266 | 0.14444447 |
| 0.292419468 | 0.14401496 |
| 0.220103349 | 0.27087047 |
| 0.282255765 | 0.1203055  |
| 0.166874663 | 0.1053482  |
| 0.293992865 | 0.10719118 |
| 0.188101497 | 0.11130047 |
| 0.249562677 | 0.25583869 |
| 0.310663947 | 0.17059944 |
| 0.435809176 | 0.18257465 |
| 0.226635381 | 0.1142685  |
| 0.567816808 | 0.24484087 |
| 0.182044515 | 0.11772417 |
| 0.426457315 | 0.13240146 |
| 0.545985187 | 0.16107132 |
| 0.113388649 | 0.11529857 |
| 0.652092357 | 0.11485351 |
| 0.386467333 | 0.19010792 |
| 0.614539489 | 0.10363454 |
| 0.558258313 | 0.13210328 |
| 0.534651519 | 0.11462549 |
| 0.631342306 | 0.13854463 |
| 0.705449771 | 0.14273279 |
| 0.391496198 | 0.11566977 |
| 0.642387436 | 0.13673723 |
| 0.189176656 | 0.17651073 |
| 0.553396046 | 0.2061743  |
| 0.658262874 | 0.15958616 |
| 0.588642455 | 0.16423157 |
| 0.581854701 | 0.17112838 |
| 0.336025693 | 0.18832126 |
| 0.388251957 | 0.27501136 |
| 0.490591483 | 0.10648388 |
| 0.329753929 | 0.11012248 |
| 0.177570122 | 0.123853   |
| 0.223885681 | 0.19115047 |
| 0.749099961 | 0.12017544 |
| 0.694501808 | 0.14802657 |
| 0.516802154 | 0.16734724 |
| 0.544100869 | 0.20456465 |
| 0.201314957 | 0.15027717 |
| 0.230702957 | 0.11582005 |
| 0.379811939 | 0.12372156 |
| 0.588867342 | 0.14602177 |
| 0.294103895 | 0.14960988 |
| 0.569622371 | 0.17221631 |

|             |            |
|-------------|------------|
| 0.74606527  | 0.12578108 |
| 0.342625727 | 0.10004731 |
| 0.523464419 | 0.14467478 |
| 0.609649706 | 0.10745389 |
| 0.382887761 | 0.21215756 |
| 0.244297401 | 0.10646286 |
| 0.186715051 | 0.13193227 |
| 0.509854052 | 0.14005097 |
| 0.53912708  | 0.12491875 |
| 0.61557617  | 0.10131251 |
| 0.506508106 | 0.23502588 |
| 0.193364101 | 0.14460465 |
| 0.634709371 | 0.162178   |
| 0.677357663 | 0.1126806  |
| 0.704744211 | 0.12171679 |
| 0.657376793 | 0.1301914  |
| 0.324591783 | 0.13635917 |
| 0.612928516 | 0.12823681 |
| 0.491717143 | 0.16928084 |
| 0.555412637 | 0.12761027 |
| 0.761103561 | 0.12851021 |
| 0.319832774 | 0.17276154 |
| 0.222945503 | 0.1088778  |
| 0.688434024 | 0.13350514 |
| 0.544734004 | 0.13194978 |
| 0.378230475 | 0.1093907  |
| 0.246918264 | 0.11365697 |
| 0.339963341 | 0.13493872 |
| 0.616671769 | 0.18406061 |
| 0.348700354 | 0.22285424 |
| 0.418145981 | 0.1463153  |
| 0.237803719 | 0.1044358  |
| 0.533558095 | 0.16975341 |
| 0.454802292 | 0.21990269 |
| 0.325137406 | 0.22253545 |
| 0.524593097 | 0.23234238 |
| 0.622147026 | 0.16809328 |
| 0.54276771  | 0.130374   |
| 0.273181391 | 0.15469805 |
| 0.314165709 | 0.15487206 |
| 0.579320567 | 0.10642488 |
| 0.25509674  | 0.10713926 |
| 0.176031996 | 0.131449   |
| 0.699534793 | 0.11966709 |
| 0.550258603 | 0.12467901 |
| 0.361625892 | 0.12927896 |



|             |            |
|-------------|------------|
| 0.309110409 | 0.18463344 |
| 0.609305255 | 0.15037283 |
| 0.673643557 | 0.15756299 |
| 0.444467598 | 0.2339364  |
| 0.59254131  | 0.11520994 |
| 0.328799188 | 0.1357014  |
| 0.198835357 | 0.19112662 |
| 0.692818032 | 0.10159615 |
| 0.544068885 | 0.17994775 |
| 0.564425652 | 0.12817072 |
| 0.603361597 | 0.15506486 |
| 0.519475676 | 0.15621023 |
| 0.509949791 | 0.11811511 |
| 0.216806131 | 0.17503638 |
| 0.670952264 | 0.14626529 |
| 0.517419771 | 0.1160176  |
| 0.643537766 | 0.1390071  |
| 0.730425604 | 0.11314769 |
| 0.460499757 | 0.10002233 |
| 0.294673029 | 0.23910131 |
| 0.51982791  | 0.11253384 |
| 0.233487377 | 0.14687431 |
| 0.179593759 | 0.18084865 |
| 0.671052552 | 0.14560286 |
| 0.657404014 | 0.1491775  |
| 0.240356261 | 0.1001142  |
| 0.692210223 | 0.10508322 |
| 0.591355987 | 0.1264019  |
| 0.397992569 | 0.14198023 |
| 0.334843488 | 0.12628386 |
| 0.604141287 | 0.10045625 |
| 0.149338432 | 0.10178523 |
| 0.230440713 | 0.10335337 |
| 0.164719234 | 0.10772928 |
| 0.162047847 | 0.11199867 |
| 0.230814801 | 0.11755648 |
| 0.265263901 | 0.11859472 |
| 0.22995509  | 0.12581267 |
| 0.375652531 | 0.12854662 |
| 0.219736475 | 0.13506298 |
| 0.307107825 | 0.13945322 |
| 0.521849984 | 0.1416996  |
| 0.244797926 | 0.15128479 |
| 0.318083154 | 0.16352881 |
| 0.279771856 | 0.18824312 |
| 0.36054776  | 0.21258884 |

|             |            |
|-------------|------------|
| 0.404711157 | 0.223266   |
| 0.37128852  | 0.23742816 |
| 0.515407069 | 0.10922888 |
| 0.214046705 | 0.11266083 |
| 0.348140985 | 0.23910664 |
| 0.654904422 | 0.10255817 |
| 0.716925612 | 0.10686019 |
| 0.736726871 | 0.12746952 |
| 0.671679821 | 0.13858636 |
| 0.616724354 | 0.13931485 |
| 0.246641183 | 0.15418672 |
| 0.530177013 | 0.10182694 |
| 0.569264095 | 0.13479905 |
| 0.310055334 | 0.13456178 |
| 0.362216558 | 0.1560942  |
| 0.302325787 | 0.11719054 |
| 0.66157609  | 0.10313433 |
| 0.651218116 | 0.1078838  |
| 0.757730211 | 0.1557605  |
| 0.618625151 | 0.12901874 |
| 0.548202838 | 0.19121926 |
| 0.465140532 | 0.23029927 |
| 0.390243149 | 0.12653559 |
| 0.640472712 | 0.13259818 |
| 0.18783352  | 0.16647038 |
| 0.542394102 | 0.16182256 |
| 0.20193972  | 0.10600604 |
| 0.726351572 | 0.11775927 |
| 0.603569554 | 0.13666302 |
| 0.717832408 | 0.14080982 |
| 0.354531179 | 0.23226842 |
| 0.228831273 | 0.14031068 |
| 0.21740007  | 0.11115925 |
| 0.450583394 | 0.10896419 |
| 0.444647266 | 0.10799834 |
| 0.729111601 | 0.12785902 |
| 0.351314526 | 0.14658473 |
| 0.751768455 | 0.12217783 |
| 0.137617897 | 0.15565568 |
| 0.424283955 | 0.23560488 |
| 0.239692622 | 0.27909711 |
| 0.441166271 | 0.18085194 |
| 0.756915159 | 0.108265   |
| 0.507047386 | 0.17136547 |
| 0.622258398 | 0.109739   |
| 0.400722742 | 0.17347544 |

|             |            |
|-------------|------------|
| 0.472935315 | 0.1005667  |
| 0.55643105  | 0.21318988 |
| 0.354419567 | 0.25368427 |
| 0.6690882   | 0.13959577 |
| 0.43715727  | 0.14462259 |
| 0.481612834 | 0.10498409 |
| 0.304532834 | 0.12245    |
| 0.634554963 | 0.13761651 |
| 0.749700131 | 0.10730366 |
| 0.661343256 | 0.12792985 |
| 0.324770877 | 0.11666873 |
| 0.285905675 | 0.11895853 |
| 0.689125457 | 0.10684095 |
| 0.525229206 | 0.12759505 |
| 0.458048809 | 0.14129548 |
| 0.422072373 | 0.10222109 |
| 0.579097584 | 0.13041069 |
| 0.419472142 | 0.16394615 |
| 0.638644589 | 0.10497559 |
| 0.516277482 | 0.11359737 |
| 0.765918177 | 0.11848207 |
| 0.771545161 | 0.12307743 |
| 0.71703415  | 0.10881557 |
| 0.459639101 | 0.20497255 |
| 0.246449989 | 0.20734552 |
| 0.514194622 | 0.2723476  |
| 0.62649385  | 0.12170348 |
| 0.459038547 | 0.13937707 |
| 0.52768351  | 0.18392794 |
| 0.241836286 | 0.11905339 |
| 0.320391052 | 0.1815222  |
| 0.373348728 | 0.10658141 |
| 0.642120446 | 0.1052894  |
| 0.387853215 | 0.1178699  |
| 0.618181268 | 0.13825277 |
| 0.411347852 | 0.12603998 |
| 0.306572722 | 0.1301929  |
| 0.628615485 | 0.19307682 |
| 0.154076362 | 0.12204944 |
| 0.53991509  | 0.21135983 |
| 0.548526552 | 0.1883052  |
| 0.722565311 | 0.12230298 |
| 0.121697884 | 0.16672854 |
| 0.38030258  | 0.18371448 |
| 0.255566544 | 0.28840306 |
| 0.658618467 | 0.14369007 |

|             |            |
|-------------|------------|
| 0.517899522 | 0.14907056 |
| 0.689247949 | 0.11671401 |
| 0.686978905 | 0.1269109  |
| 0.421917602 | 0.1373769  |
| 0.279089738 | 0.15181968 |
| 0.21656632  | 0.14048453 |
| 0.272957055 | 0.22678255 |
| 0.740613466 | 0.12035855 |
| 0.322223092 | 0.18767785 |
| 0.377740392 | 0.10314509 |
| 0.343779043 | 0.19977128 |
| 0.682530046 | 0.11477425 |
| 0.139759297 | 0.2023114  |
| 0.706218816 | 0.10113925 |
| 0.112626169 | 0.13731712 |
| 0.16554234  | 0.15587392 |
| 0.579179762 | 0.11799951 |
| 0.262998194 | 0.11654535 |
| 0.494175642 | 0.14616651 |
| 0.413750762 | 0.1497972  |
| 0.370153753 | 0.11334789 |
| 0.50150955  | 0.14258055 |
| 0.291123031 | 0.14141051 |
| 0.280306321 | 0.16364056 |
| 0.281930306 | 0.17237074 |
| 0.762597218 | 0.12205466 |
| 0.486119912 | 0.18116889 |
| 0.594147365 | 0.10172258 |
| 0.44270918  | 0.15860509 |
| 0.286578237 | 0.10521739 |
| 0.607563081 | 0.13592608 |
| 0.504538601 | 0.17006815 |
| 0.623936467 | 0.11445055 |
| 0.20102386  | 0.11371533 |
| 0.265804859 | 0.12277024 |
| 0.653419219 | 0.17475707 |
| 0.569609857 | 0.18323517 |
| 0.474757834 | 0.19700608 |
| 0.434998936 | 0.26395541 |
| 0.199627919 | 0.12003514 |
| 0.307072063 | 0.11485689 |
| 0.204416507 | 0.11204138 |
| 0.715453338 | 0.1349277  |
| 0.243726343 | 0.16963211 |
| 0.482867286 | 0.10366279 |
| 0.451725824 | 0.11134314 |

|             |            |
|-------------|------------|
| 0.430083407 | 0.15427175 |
| 0.48509379  | 0.17356158 |
| 0.447013582 | 0.14470651 |
| 0.187391089 | 0.17168499 |
| 0.589472681 | 0.11745464 |
| 0.393366589 | 0.14722291 |
| 0.158160993 | 0.16119132 |
| 0.150404104 | 0.10646539 |
| 0.624732891 | 0.10732979 |
| 0.546208692 | 0.128242   |
| 0.29223907  | 0.15913183 |
| 0.713138313 | 0.10538441 |
| 0.349611812 | 0.24311202 |
| 0.588757836 | 0.15619651 |
| 0.767174539 | 0.10035851 |
| 0.304854049 | 0.10459957 |
| 0.700354521 | 0.10602656 |
| 0.281629213 | 0.14077283 |
| 0.388523725 | 0.16631636 |
| 0.239651479 | 0.20115303 |
| 0.629894248 | 0.13063375 |
| 0.710186746 | 0.1124699  |
| 0.696217277 | 0.10651392 |
| 0.543344224 | 0.22186361 |
| 0.732482176 | 0.10880421 |
| 0.399275263 | 0.12131995 |
| 0.116795186 | 0.10475523 |
| 0.712598361 | 0.13967778 |
| 0.328221858 | 0.1389312  |
| 0.490191362 | 0.24560092 |
| 0.516340184 | 0.12767017 |
| 0.546203745 | 0.15627077 |
| 0.405464565 | 0.10745414 |
| 0.419695323 | 0.1637135  |
| 0.471429821 | 0.15712912 |
| 0.641718383 | 0.19043768 |
| 0.678454688 | 0.12290748 |
| 0.399726105 | 0.11472476 |
| 0.435379896 | 0.11050529 |
| 0.187116655 | 0.12661135 |
| 0.479845074 | 0.12881553 |
| 0.712997792 | 0.13194908 |
| 0.343825157 | 0.13758428 |
| 0.520527257 | 0.21837751 |
| 0.303182469 | 0.11135164 |
| 0.555462415 | 0.16391598 |

|             |            |
|-------------|------------|
| 0.416761312 | 0.10101968 |
| 0.30928203  | 0.10864083 |
| 0.672640851 | 0.10730733 |
| 0.288914975 | 0.14381501 |
| 0.611094426 | 0.20828922 |
| 0.684224062 | 0.17283871 |
| 0.661063986 | 0.1484214  |
| 0.428649958 | 0.19105706 |
| 0.576380981 | 0.1307717  |
| 0.579526002 | 0.10218381 |
| 0.631782131 | 0.1595734  |
| 0.723731766 | 0.12940338 |
| 0.732815326 | 0.10692246 |
| 0.269105727 | 0.10216048 |
| 0.486028188 | 0.13568597 |
| 0.140746899 | 0.14142666 |
| 0.473326102 | 0.15211832 |
| 0.600884896 | 0.16344368 |
| 0.609852786 | 0.19696905 |
| 0.288361141 | 0.19840857 |
| 0.595848244 | 0.20417857 |
| 0.416367798 | 0.20959981 |
| 0.452803341 | 0.24695896 |
| 0.249621648 | 0.31570083 |
| 0.335760727 | 0.11066102 |
| 0.54528505  | 0.25505624 |
| 0.517574449 | 0.29082496 |
| 0.530505798 | 0.12894427 |
| 0.130666038 | 0.10558642 |
| 0.270439112 | 0.19847788 |
| 0.518366533 | 0.26579754 |
| 0.457207219 | 0.18574424 |
| 0.728000879 | 0.12350137 |
| 0.371561203 | 0.11002526 |
| 0.198735597 | 0.12196569 |
| 0.604353427 | 0.10990272 |
| 0.640354541 | 0.13890574 |
| 0.403724516 | 0.16292026 |
| 0.460867012 | 0.15504541 |
| 0.730439398 | 0.13449489 |
| 0.727678031 | 0.10754638 |
| 0.202713899 | 0.19498257 |
| 0.380517929 | 0.27859503 |
| 0.635462225 | 0.14653215 |
| 0.341418684 | 0.1483513  |
| 0.160222157 | 0.13690432 |

|             |            |
|-------------|------------|
| 0.471871503 | 0.11482929 |
| 0.59674341  | 0.12029348 |
| 0.455810912 | 0.1223928  |
| 0.275122683 | 0.12513714 |
| 0.237290061 | 0.11641611 |
| 0.362216105 | 0.11920502 |
| 0.259499759 | 0.16733603 |
| 0.161684134 | 0.13057409 |
| 0.252194455 | 0.11343112 |
| 0.512481005 | 0.14445648 |
| 0.191970572 | 0.15355748 |
| 0.771821495 | 0.11225933 |
| 0.366825211 | 0.16900391 |
| 0.217401171 | 0.11407468 |
| 0.232871183 | 0.14256106 |
| 0.65617443  | 0.13282971 |
| 0.481954368 | 0.10360668 |
| 0.589582396 | 0.17779279 |
| 0.445936043 | 0.24647047 |
| 0.661826332 | 0.1149943  |
| 0.463852565 | 0.10563537 |
| 0.303883724 | 0.11384758 |
| 0.521889226 | 0.13731599 |
| 0.636972649 | 0.14252387 |
| 0.287857844 | 0.20955667 |
| 0.725697651 | 0.11703062 |
| 0.230274949 | 0.13876777 |
| 0.19570493  | 0.21831157 |
| 0.367219541 | 0.18992985 |
| 0.162985415 | 0.1076487  |
| 0.313533558 | 0.15456965 |
| 0.635395911 | 0.11348    |
| 0.555062782 | 0.12426274 |
| 0.720541787 | 0.12135142 |
| 0.27412049  | 0.13664343 |
| 0.5212919   | 0.13894258 |
| 0.477991232 | 0.19496344 |
| 0.404197234 | 0.12556565 |
| 0.380410827 | 0.10703953 |
| 0.676378623 | 0.13890416 |
| 0.627668825 | 0.14692202 |
| 0.692192579 | 0.10436874 |
| 0.434601666 | 0.25135792 |
| 0.598486643 | 0.13413101 |
| 0.333353262 | 0.10156825 |
| 0.351550307 | 0.10583287 |

|             |            |
|-------------|------------|
| 0.491871228 | 0.12361046 |
| 0.23001532  | 0.20010899 |
| 0.570445894 | 0.13777569 |
| 0.404769917 | 0.11600921 |
| 0.174788229 | 0.10267611 |
| 0.627245785 | 0.12394083 |
| 0.647403138 | 0.11513353 |
| 0.466400082 | 0.12198989 |
| 0.526787637 | 0.12760533 |
| 0.341525396 | 0.10287737 |
| 0.430312268 | 0.13665309 |
| 0.425152804 | 0.13126605 |
| 0.568168088 | 0.14489047 |
| 0.436818071 | 0.1812243  |
| 0.508952164 | 0.15217009 |
| 0.406502739 | 0.13690308 |
| 0.146893356 | 0.12179943 |
| 0.425061432 | 0.1937105  |
| 0.736527786 | 0.12722673 |
| 0.443163878 | 0.17709872 |
| 0.412624938 | 0.19152888 |
| 0.715645178 | 0.11555211 |
| 0.322329    | 0.12911238 |
| 0.528140486 | 0.14816993 |
| 0.413352679 | 0.17279242 |
| 0.734616234 | 0.10331082 |
| 0.680235615 | 0.12124374 |
| 0.307863411 | 0.24419774 |
| 0.508198029 | 0.15152846 |
| 0.786598889 | 0.10175291 |
| 0.475720047 | 0.10443433 |
| 0.702095858 | 0.12249178 |
| 0.740751439 | 0.12864461 |
| 0.604237551 | 0.14574092 |
| 0.493729807 | 0.22466375 |
| 0.602756762 | 0.19845063 |
| 0.579346055 | 0.17338843 |
| 0.661049458 | 0.11303527 |
| 0.75929298  | 0.11244313 |
| 0.37079143  | 0.20768973 |
| 0.130665059 | 0.1167764  |
| 0.239708352 | 0.13487658 |
| 0.133356572 | 0.14528744 |
| 0.455303739 | 0.16118675 |
| 0.183115477 | 0.18017553 |
| 0.167758409 | 0.10266093 |



|             |            |
|-------------|------------|
| 0.595483085 | 0.13392125 |
| 0.388074298 | 0.14200783 |
| 0.365604459 | 0.23830625 |
| 0.447741426 | 0.13384033 |
| 0.610574788 | 0.18399762 |
| 0.734799758 | 0.1201121  |
| 0.679534373 | 0.12560708 |
| 0.5923085   | 0.23273066 |
| 0.313253876 | 0.31631614 |
| 0.561475433 | 0.12554314 |
| 0.139847571 | 0.11486063 |
| 0.652021486 | 0.1235881  |
| 0.495771006 | 0.14206999 |
| 0.419845518 | 0.12583276 |
| 0.670582713 | 0.12849894 |
| 0.324677446 | 0.11780859 |
| 0.582400875 | 0.15148885 |
| 0.403119566 | 0.19097666 |
| 0.45607748  | 0.14604845 |
| 0.334422211 | 0.16097327 |
| 0.252815639 | 0.12035254 |
| 0.520205149 | 0.12681017 |
| 0.684415425 | 0.14394494 |
| 0.334555762 | 0.20018547 |
| 0.381257126 | 0.15125683 |
| 0.283943881 | 0.11797326 |
| 0.316061065 | 0.15745255 |
| 0.263078196 | 0.12698597 |
| 0.287996206 | 0.13478481 |
| 0.600115621 | 0.12869924 |
| 0.208738262 | 0.14552326 |
| 0.190860946 | 0.16198193 |
| 0.528794451 | 0.2118483  |
| 0.469283733 | 0.1516205  |
| 0.56868797  | 0.17851406 |
| 0.459010396 | 0.2670075  |
| 0.500097164 | 0.11411495 |
| 0.449402342 | 0.16542472 |
| 0.497233034 | 0.13109249 |
| 0.673198769 | 0.11689659 |
| 0.460942962 | 0.24155771 |
| 0.324844248 | 0.1465107  |
| 0.49337909  | 0.396713   |
| 0.181103632 | 0.1515343  |
| 0.548906384 | 0.14064443 |
| 0.674839003 | 0.16183789 |

|             |            |
|-------------|------------|
| 0.315148535 | 0.16460953 |
| 0.617457136 | 0.18093255 |
| 0.234227696 | 0.10009219 |
| 0.261828495 | 0.13574536 |
| 0.51847926  | 0.21016373 |
| 0.525154179 | 0.10211526 |
| 0.440190147 | 0.16734715 |
| 0.595572222 | 0.17677833 |
| 0.201404082 | 0.19491691 |
| 0.759146635 | 0.12056232 |
| 0.223229643 | 0.13115586 |
| 0.16297621  | 0.14014677 |
| 0.566643414 | 0.11951929 |
| 0.661737328 | 0.17046807 |
| 0.587986708 | 0.12443462 |
| 0.356238537 | 0.16820495 |
| 0.557478281 | 0.10528979 |
| 0.694143715 | 0.14592006 |
| 0.570205375 | 0.1546341  |
| 0.346228059 | 0.27499083 |
| 0.264843425 | 0.13842864 |
| 0.532671658 | 0.18274168 |
| 0.821147662 | 0.1074179  |
| 0.557348415 | 0.12185515 |
| 0.61715059  | 0.17333114 |
| 0.470457675 | 0.18275842 |
| 0.300910287 | 0.13779046 |
| 0.556966466 | 0.13617244 |
| 0.525969187 | 0.16173093 |
| 0.624465091 | 0.18259513 |
| 0.375620635 | 0.18397197 |
| 0.259800619 | 0.21119009 |
| 0.339384951 | 0.12897331 |
| 0.572999791 | 0.1462518  |
| 0.409639858 | 0.127837   |
| 0.626914512 | 0.14744654 |
| 0.312030356 | 0.15309111 |
| 0.353735847 | 0.15184083 |
| 0.575669432 | 0.1016663  |
| 0.348724735 | 0.12455129 |
| 0.648614777 | 0.13175028 |
| 0.634938395 | 0.14205979 |
| 0.537996556 | 0.1676052  |
| 0.505869592 | 0.17300087 |
| 0.281549444 | 0.25362554 |
| 0.724381246 | 0.12479858 |

|             |            |
|-------------|------------|
| 0.714745034 | 0.12510925 |
| 0.458354068 | 0.19443049 |
| 0.603687147 | 0.15145318 |
| 0.320312023 | 0.10709627 |
| 0.265452384 | 0.11009544 |
| 0.171678064 | 0.13006026 |
| 0.581998447 | 0.16509651 |
| 0.701229139 | 0.1346401  |
| 0.72764136  | 0.13532498 |
| 0.643130774 | 0.18336368 |
| 0.580721414 | 0.11156873 |
| 0.233668074 | 0.11442895 |
| 0.396167151 | 0.12429485 |
| 0.614046069 | 0.10480354 |
| 0.501919684 | 0.11790817 |
| 0.224343324 | 0.13382661 |
| 0.337432419 | 0.14884722 |
| 0.289292477 | 0.11718094 |
| 0.541765319 | 0.15850398 |
| 0.466400034 | 0.21208837 |
| 0.356091401 | 0.16140492 |
| 0.264468075 | 0.16892372 |
| 0.595160037 | 0.14318912 |
| 0.226819967 | 0.11233241 |
| 0.232259198 | 0.1230958  |
| 0.274195349 | 0.1190418  |
| 0.543923349 | 0.15716204 |
| 0.276343042 | 0.21655454 |
| 0.254189559 | 0.21707381 |
| 0.751764624 | 0.12562369 |
| 0.534253431 | 0.13007965 |
| 0.468780199 | 0.13400136 |
| 0.57294968  | 0.11388977 |
| 0.332739183 | 0.12686149 |
| 0.259725534 | 0.15769548 |
| 0.36793256  | 0.15780605 |
| 0.719977876 | 0.12596863 |
| 0.441973603 | 0.11139002 |
| 0.097538506 | 0.11394119 |
| 0.382366633 | 0.1263745  |
| 0.408588486 | 0.17431097 |
| 0.177509031 | 0.12702736 |
| 0.29317472  | 0.1565964  |
| 0.308906088 | 0.17476015 |
| 0.682591254 | 0.16389701 |
| 0.251891766 | 0.12055057 |

|             |            |
|-------------|------------|
| 0.502910746 | 0.19218167 |
| 0.194620777 | 0.12326804 |
| 0.653105241 | 0.14478798 |
| 0.459707259 | 0.13006966 |
| 0.453394173 | 0.11792781 |
| 0.651700365 | 0.13197018 |
| 0.577076685 | 0.17188909 |
| 0.504073214 | 0.19325426 |
| 0.557660643 | 0.14842439 |
| 0.590512783 | 0.12720396 |
| 0.54630086  | 0.1284277  |
| 0.224388796 | 0.12447611 |
| 0.596744592 | 0.17130123 |
| 0.184355153 | 0.10839019 |
| 0.711453677 | 0.11858495 |
| 0.47741605  | 0.15941185 |
| 0.32989877  | 0.1118776  |
| 0.435693192 | 0.21898517 |
| 0.47226276  | 0.14353279 |
| 0.233003869 | 0.16021289 |
| 0.3391355   | 0.15112028 |
| 0.369636238 | 0.16315091 |
| 0.601195273 | 0.10235409 |
| 0.366663515 | 0.16525289 |
| 0.46887297  | 0.17984087 |
| 0.046096571 | 0.10590423 |
| 0.21636897  | 0.28355258 |
| 0.323650216 | 0.1731579  |
| 0.515292552 | 0.15219666 |
| 0.423207171 | 0.19705408 |
| 0.589881892 | 0.13654117 |
| 0.483934566 | 0.10147166 |
| 0.685528077 | 0.12365116 |
| 0.203313716 | 0.12017002 |
| 0.60165008  | 0.15709751 |
| 0.307635067 | 0.23129041 |
| 0.069711508 | 0.13001732 |
| 0.378847501 | 0.12549128 |
| 0.462689688 | 0.1902036  |
| 0.633315193 | 0.13322905 |
| 0.522891087 | 0.16552912 |
| 0.615527198 | 0.12980185 |
| 0.617493212 | 0.1441806  |
| 0.51662453  | 0.10697647 |
| 0.325491032 | 0.27029428 |
| 0.125728058 | 0.15131427 |

|             |            |
|-------------|------------|
| 0.5273492   | 0.12801175 |
| 0.15053364  | 0.14876087 |
| 0.702826393 | 0.12558126 |
| 0.560727756 | 0.12934643 |
| 0.429502098 | 0.11745964 |
| 0.433295644 | 0.16758796 |
| 0.686307896 | 0.1365913  |
| 0.666375557 | 0.13694544 |
| 0.461190213 | 0.17642702 |
| 0.436585373 | 0.24612442 |
| 0.468894507 | 0.10676422 |
| 0.614601115 | 0.20275637 |
| 0.571330194 | 0.11695604 |
| 0.18376983  | 0.10525266 |
| 0.338075083 | 0.17739141 |
| 0.673017453 | 0.10471427 |
| 0.616272536 | 0.13852023 |
| 0.583644975 | 0.15291174 |
| 0.731372198 | 0.11888879 |
| 0.611489951 | 0.197028   |
| 0.111469577 | 0.10287396 |
| 0.455560999 | 0.11510748 |
| 0.691784534 | 0.10747458 |
| 0.394352745 | 0.20905379 |
| 0.138685978 | 0.11567325 |
| 0.154246623 | 0.11841333 |
| 0.691527151 | 0.11032608 |
| 0.66985936  | 0.12702794 |
| 0.272507454 | 0.1239234  |
| 0.2637943   | 0.17568985 |
| 0.479086772 | 0.10428854 |
| 0.692994705 | 0.11312095 |
| 0.139909664 | 0.14202214 |
| 0.316016818 | 0.17495202 |
| 0.506410226 | 0.12037324 |
| 0.235901802 | 0.10548821 |
| 0.658310003 | 0.11101169 |
| 0.381884532 | 0.22310228 |
| 0.657140168 | 0.12061495 |
| 0.147323639 | 0.11519245 |
| 0.650715626 | 0.12546926 |
| 0.41234251  | 0.10849947 |
| 0.421089173 | 0.14525444 |
| 0.587288383 | 0.15218526 |
| 0.484512544 | 0.1441743  |
| 0.341522037 | 0.14447857 |

|             |            |
|-------------|------------|
| 0.427442443 | 0.17838435 |
| 0.609696001 | 0.13853293 |
| 0.77871368  | 0.11797927 |
| 0.239350494 | 0.1090514  |
| 0.609904742 | 0.11480234 |
| 0.735714403 | 0.10137381 |
| 0.612352922 | 0.12650272 |
| 0.547779001 | 0.15943633 |
| 0.693127762 | 0.1631273  |
| 0.307182626 | 0.23123473 |
| 0.428813654 | 0.23508031 |
| 0.553834811 | 0.24107983 |
| 0.64751904  | 0.12056695 |
| 0.498157767 | 0.18357664 |
| 0.42654053  | 0.17338861 |
| 0.331096264 | 0.17351304 |
| 0.677360036 | 0.1245804  |
| 0.417571022 | 0.14653817 |
| 0.520262511 | 0.16254384 |
| 0.340516026 | 0.10984085 |
| 0.599216389 | 0.1113577  |
| 0.310220531 | 0.19755406 |
| 0.665870508 | 0.12401868 |
| 0.345153049 | 0.12392635 |
| 0.577308235 | 0.13275595 |
| 0.282545983 | 0.11631356 |
| 0.268704286 | 0.15160917 |
| 0.503760922 | 0.10540877 |
| 0.234428282 | 0.13760293 |
| 0.239145674 | 0.20769791 |
| 0.535508259 | 0.10706092 |
| 0.615729418 | 0.10515342 |
| 0.68730538  | 0.12830451 |
| 0.248480131 | 0.10415455 |
| 0.494376264 | 0.13097493 |
| 0.579192775 | 0.17641014 |
| 0.46516849  | 0.11834349 |
| 0.285844915 | 0.10557198 |
| 0.739350694 | 0.10942202 |
| 0.411354746 | 0.26751935 |
| 0.571038048 | 0.13365773 |
| 0.47519669  | 0.13012948 |
| 0.40855888  | 0.18960708 |
| 0.336762868 | 0.1649636  |
| 0.7130241   | 0.15486063 |
| 0.147103083 | 0.11866865 |

|             |            |
|-------------|------------|
| 0.460710364 | 0.12888314 |
| 0.612643557 | 0.12367023 |
| 0.502554981 | 0.18070063 |
| 0.178406552 | 0.18181049 |
| 0.568213687 | 0.17407823 |
| 0.588628563 | 0.10290348 |
| 0.19009135  | 0.14438018 |
| 0.464128175 | 0.18658655 |
| 0.328081334 | 0.12122963 |
| 0.555667781 | 0.17772399 |
| 0.175834325 | 0.10580007 |
| 0.541298555 | 0.10643702 |
| 0.275609353 | 0.11894953 |
| 0.139910818 | 0.12888227 |
| 0.445073173 | 0.19632324 |
| 0.415390301 | 0.24566163 |
| 0.604800413 | 0.12201988 |
| 0.697097055 | 0.10240134 |
| 0.328414662 | 0.14865548 |
| 0.311266064 | 0.15541291 |
| 0.544567109 | 0.11471996 |
| 0.712807778 | 0.15865943 |
| 0.198897747 | 0.14670305 |
| 0.153438629 | 0.14430927 |
| 0.282312785 | 0.12796227 |
| 0.511618732 | 0.15863148 |
| 0.283229955 | 0.16312606 |
| 0.363698406 | 0.19120737 |
| 0.672470081 | 0.14662386 |
| 0.148353678 | 0.13347756 |
| 0.173968403 | 0.15210002 |
| 0.369403518 | 0.16669705 |
| 0.13661255  | 0.18517196 |
| 0.177464254 | 0.22294427 |
| 0.174326733 | 0.23767236 |
| 0.14888178  | 0.24665459 |
| 0.145922251 | 0.25091871 |
| 0.180070821 | 0.27857505 |
| 0.142320227 | 0.18716817 |
| 0.623050339 | 0.12310327 |
| 0.501673961 | 0.12880167 |
| 0.468066092 | 0.12528686 |
| 0.152544652 | 0.11463331 |
| 0.63526206  | 0.12013694 |
| 0.704887404 | 0.10755166 |
| 0.602124834 | 0.14018016 |

|             |            |
|-------------|------------|
| 0.217580256 | 0.1146621  |
| 0.517415128 | 0.15793676 |
| 0.342721088 | 0.16522962 |
| 0.406179975 | 0.11110354 |
| 0.657864331 | 0.16243205 |
| 0.521722897 | 0.11557241 |
| 0.336960969 | 0.15757881 |
| 0.525769147 | 0.13351573 |
| 0.611938425 | 0.16678367 |
| 0.630355401 | 0.14407459 |
| 0.720527739 | 0.10074012 |
| 0.264754839 | 0.13671632 |
| 0.590155847 | 0.11876992 |
| 0.502224316 | 0.13691158 |
| 0.442309164 | 0.21090078 |
| 0.460160298 | 0.12190482 |
| 0.335395043 | 0.10592547 |
| 0.207674548 | 0.13840923 |
| 0.549614429 | 0.1313591  |
| 0.196871942 | 0.12467358 |
| 0.567259712 | 0.12614167 |
| 0.743051768 | 0.10850765 |
| 0.417194113 | 0.14692075 |
| 0.329034222 | 0.12825821 |
| 0.519132821 | 0.12131897 |
| 0.173534769 | 0.12120398 |
| 0.45440469  | 0.11186732 |
| 0.324355338 | 0.13209187 |
| 0.405486144 | 0.21175082 |
| 0.617906106 | 0.11721738 |
| 0.08713296  | 0.12557098 |
| 0.137232099 | 0.18519514 |
| 0.381531297 | 0.2495509  |
| 0.176987468 | 0.14647749 |
| 0.378832844 | 0.26736849 |
| 0.413969974 | 0.10404443 |
| 0.492243542 | 0.13495569 |
| 0.527187107 | 0.17876755 |
| 0.586267245 | 0.15825917 |
| 0.251203412 | 0.10988409 |
| 0.314163096 | 0.10256434 |
| 0.28325947  | 0.2692523  |
| 0.187434558 | 0.13224462 |
| 0.543967913 | 0.13621799 |
| 0.280778748 | 0.21727881 |
| 0.21019056  | 0.17358853 |



|             |            |
|-------------|------------|
| 0.619864956 | 0.14144838 |
| 0.384270615 | 0.10577405 |
| 0.332355115 | 0.13749876 |
| 0.67847676  | 0.15306152 |
| 0.780778192 | 0.11354264 |
| 0.454737823 | 0.20538174 |
| 0.682469335 | 0.11011113 |
| 0.574683742 | 0.11759815 |
| 0.389935403 | 0.24854617 |
| 0.200370768 | 0.12635672 |
| 0.202775372 | 0.13370616 |
| 0.446506981 | 0.10428069 |
| 0.479516686 | 0.16240759 |
| 0.449725427 | 0.10606574 |
| 0.286146449 | 0.13258242 |
| 0.312986384 | 0.1275892  |
| 0.332129252 | 0.15692379 |
| 0.127524683 | 0.13632292 |
| 0.384834109 | 0.14259432 |
| 0.458675834 | 0.12542366 |
| 0.67999212  | 0.1140305  |
| 0.573848167 | 0.10825217 |
| 0.554869896 | 0.23706221 |
| 0.370475239 | 0.12608315 |
| 0.32337166  | 0.1492283  |
| 0.747637761 | 0.1189556  |
| 0.409791782 | 0.12432512 |
| 0.347365077 | 0.10257762 |
| 0.40498536  | 0.16020197 |
| 0.607728613 | 0.1009064  |
| 0.464082753 | 0.12210819 |
| 0.34737706  | 0.13594152 |
| 0.38536566  | 0.17777688 |
| 0.543080614 | 0.23414815 |
| 0.603641237 | 0.23766487 |
| 0.110232598 | 0.129284   |
| 0.089311065 | 0.15658643 |
| 0.49988589  | 0.1225706  |
| 0.64959261  | 0.11481447 |
| 0.483528099 | 0.15804938 |
| 0.576195988 | 0.11673377 |
| 0.24437771  | 0.14329915 |
| 0.373482498 | 0.15360071 |
| 0.173441985 | 0.15439024 |
| 0.416885444 | 0.23754491 |
| 0.413374147 | 0.15102129 |

|             |            |
|-------------|------------|
| 0.738513322 | 0.11322719 |
| 0.552953405 | 0.16263607 |
| 0.577905328 | 0.15474882 |
| 0.646941019 | 0.11596379 |
| 0.417892628 | 0.15465632 |
| 0.378385131 | 0.11465848 |
| 0.128051931 | 0.23765958 |
| 0.74383538  | 0.11624241 |
| 0.660933919 | 0.10574172 |
| 0.114164159 | 0.14866556 |
| 0.466632264 | 0.11202373 |
| 0.643411442 | 0.12486083 |
| 0.638117355 | 0.14789463 |
| 0.25477668  | 0.1727496  |
| 0.219629537 | 0.16041449 |
| 0.686149714 | 0.12855068 |
| 0.385774691 | 0.10040045 |
| 0.371704922 | 0.15073973 |
| 0.281832573 | 0.16898386 |
| 0.256121778 | 0.1071662  |
| 0.242762583 | 0.11287414 |
| 0.314326159 | 0.23969171 |
| 0.484868393 | 0.10687124 |
| 0.529440748 | 0.1049694  |
| 0.320888752 | 0.14786565 |
| 0.364902166 | 0.11932667 |
| 0.455846353 | 0.13054383 |
| 0.344608095 | 0.11958642 |
| 0.231661595 | 0.17178482 |
| 0.223355704 | 0.10477376 |
| 0.425303006 | 0.1010739  |
| 0.405611933 | 0.15902806 |
| 0.353257301 | 0.16400864 |
| 0.575662964 | 0.10864005 |
| 0.381247654 | 0.17102068 |
| 0.383287098 | 0.11166166 |
| 0.307810969 | 0.11748994 |
| 0.384793258 | 0.21761673 |
| 0.649711826 | 0.10695609 |
| 0.673554652 | 0.10033395 |
| 0.555076383 | 0.17831318 |
| 0.102514291 | 0.12558583 |
| 0.237476134 | 0.16706139 |
| 0.333286171 | 0.16114234 |
| 0.13397363  | 0.13439674 |
| 0.322070483 | 0.1263593  |

|             |            |
|-------------|------------|
| 0.682293066 | 0.10053269 |
| 0.535032748 | 0.1031695  |
| 0.449302295 | 0.12580895 |
| 0.657804236 | 0.12718308 |
| 0.694898456 | 0.13105668 |
| 0.594968494 | 0.11325839 |
| 0.45505703  | 0.12619432 |
| 0.450159465 | 0.12722577 |
| 0.599695027 | 0.14669665 |
| 0.255094076 | 0.14956583 |
| 0.509768987 | 0.27311252 |
| 0.676075176 | 0.11798708 |
| 0.267788326 | 0.12997918 |
| 0.297258736 | 0.14153447 |
| 0.516376882 | 0.24139787 |
| 0.625817599 | 0.13260996 |
| 0.653038385 | 0.18069649 |
| 0.44265305  | 0.21977406 |
| 0.344685983 | 0.16249316 |
| 0.512690979 | 0.14094148 |
| 0.370575439 | 0.10384577 |
| 0.715891757 | 0.11387825 |
| 0.41957558  | 0.17561916 |
| 0.299364819 | 0.11635791 |
| 0.299060434 | 0.13732824 |
| 0.58319774  | 0.1214762  |
| 0.485733697 | 0.13492795 |
| 0.156084239 | 0.10458225 |
| 0.316847374 | 0.1091232  |
| 0.184102597 | 0.13927809 |
| 0.363743207 | 0.12773711 |
| 0.402394478 | 0.12841226 |
| 0.298503918 | 0.16052165 |
| 0.311002043 | 0.14422202 |
| 0.78828348  | 0.10346745 |
| 0.661307085 | 0.15410936 |
| 0.552147245 | 0.20010339 |
| 0.5795759   | 0.23474581 |
| 0.229767882 | 0.10812588 |
| 0.427408219 | 0.13464106 |
| 0.378913874 | 0.12437648 |
| 0.46979734  | 0.12666726 |
| 0.750194073 | 0.1074313  |
| 0.565306227 | 0.15129896 |
| 0.457561463 | 0.18969693 |
| 0.49775774  | 0.19346826 |

|             |            |
|-------------|------------|
| 0.585045944 | 0.15110735 |
| 0.274605547 | 0.10562416 |
| 0.359139384 | 0.10474993 |
| 0.664213526 | 0.12380744 |
| 0.188953293 | 0.12854092 |
| 0.597449586 | 0.12968785 |
| 0.49420953  | 0.14481661 |
| 0.478520639 | 0.14600369 |
| 0.180621796 | 0.13405601 |
| 0.49949251  | 0.13409512 |
| 0.34092761  | 0.20531225 |
| 0.206248698 | 0.11862361 |
| 0.666661264 | 0.13779324 |
| 0.569314144 | 0.18079321 |
| 0.556572666 | 0.11067782 |
| 0.237695958 | 0.13262104 |
| 0.255377282 | 0.15713568 |
| 0.406402567 | 0.10231627 |
| 0.401743941 | 0.12833455 |
| 0.64341006  | 0.13428366 |
| 0.187570244 | 0.11574403 |
| 0.60759779  | 0.10927899 |
| 0.157917726 | 0.11206866 |
| 0.648434968 | 0.1130448  |
| 0.270225816 | 0.10431568 |
| 0.198682571 | 0.11981221 |
| 0.610975708 | 0.11615609 |
| 0.610186842 | 0.10024358 |
| 0.477730314 | 0.14221238 |
| 0.46186664  | 0.10396778 |
| 0.382209001 | 0.10981568 |
| 0.394933585 | 0.1005909  |
| 0.33754963  | 0.16003801 |
| 0.453594037 | 0.10305079 |
| 0.148063408 | 0.1106954  |
| 0.434611464 | 0.18551961 |
| 0.311470483 | 0.11690483 |
| 0.364758125 | 0.23411516 |
| 0.320093182 | 0.11733737 |
| 0.060387248 | 0.12088356 |
| 0.546216508 | 0.11504064 |
| 0.475813337 | 0.20850786 |
| 0.328343811 | 0.10840694 |
| 0.38356162  | 0.22462991 |
| 0.6919933   | 0.19919274 |
| 0.473254209 | 0.15248511 |

|             |            |
|-------------|------------|
| 0.478607929 | 0.20814826 |
| 0.390616019 | 0.13579409 |
| 0.668683125 | 0.11393394 |
| 0.181115475 | 0.10464748 |
| 0.599602878 | 0.10862232 |
| 0.321356008 | 0.10384255 |
| 0.55380685  | 0.11180976 |
| 0.593917798 | 0.11426869 |
| 0.632728438 | 0.17010971 |
| 0.699755689 | 0.12217371 |
| 0.295994138 | 0.11836946 |
| 0.582015863 | 0.12955224 |
| 0.253174469 | 0.16970297 |
| 0.404931977 | 0.19780378 |
| 0.22709067  | 0.1592373  |
| 0.240499353 | 0.12701677 |
| 0.633776755 | 0.14643614 |
| 0.720803169 | 0.13048865 |
| 0.476206339 | 0.16794328 |
| 0.552848437 | 0.11974644 |
| 0.342961564 | 0.14699704 |
| 0.370430206 | 0.16283242 |
| 0.208324376 | 0.10506208 |
| 0.728151255 | 0.11310143 |
| 0.574373345 | 0.16928925 |
| 0.526704331 | 0.20390926 |
| 0.493667911 | 0.21912953 |
| 0.696845607 | 0.13624781 |
| 0.288097751 | 0.12032561 |
| 0.544526644 | 0.1663912  |
| 0.643671436 | 0.10308741 |
| 0.70243362  | 0.10798894 |
| 0.529813882 | 0.11623014 |
| 0.120439408 | 0.16130093 |
| 0.258766233 | 0.11249614 |
| 0.412058317 | 0.17796734 |
| 0.706368226 | 0.12356693 |
| 0.420253418 | 0.18750359 |
| 0.480488251 | 0.10675556 |
| 0.657467737 | 0.10723852 |
| 0.698135546 | 0.12519761 |
| 0.18095241  | 0.14924579 |
| 0.686289195 | 0.10027543 |
| 0.256702672 | 0.13295348 |
| 0.654319861 | 0.12801687 |
| 0.604817464 | 0.10426654 |

|             |            |
|-------------|------------|
| 0.578593028 | 0.10959726 |
| 0.427125129 | 0.117406   |
| 0.425093377 | 0.12764    |
| 0.345159902 | 0.17189013 |
| 0.578465684 | 0.14353714 |
| 0.289944555 | 0.18287855 |
| 0.669218182 | 0.12111211 |
| 0.190835647 | 0.14108269 |
| 0.516239756 | 0.11806502 |
| 0.113213591 | 0.12028075 |
| 0.138033694 | 0.12638552 |
| 0.116116518 | 0.13228107 |
| 0.098590458 | 0.14251192 |
| 0.455284388 | 0.16269734 |
| 0.470748491 | 0.20268316 |
| 0.238603203 | 0.2035754  |
| 0.141058531 | 0.20773119 |
| 0.31350503  | 0.21523843 |
| 0.188682989 | 0.21836385 |
| 0.292961816 | 0.21846022 |
| 0.196323126 | 0.22415983 |
| 0.134080909 | 0.22479867 |
| 0.209430545 | 0.23816403 |
| 0.298775136 | 0.24049755 |
| 0.417696437 | 0.24787901 |
| 0.149464524 | 0.24878902 |
| 0.322092955 | 0.12925518 |
| 0.168905577 | 0.13460439 |
| 0.175106417 | 0.13774251 |
| 0.173845923 | 0.13842732 |
| 0.530440052 | 0.14368339 |
| 0.339513267 | 0.15142094 |
| 0.575296505 | 0.16455795 |
| 0.191308363 | 0.17261283 |
| 0.35217076  | 0.17663267 |
| 0.183659365 | 0.17749574 |
| 0.234494592 | 0.18253711 |
| 0.518511032 | 0.18587732 |
| 0.456760923 | 0.19105378 |
| 0.46293416  | 0.2112907  |
| 0.357933157 | 0.22401326 |
| 0.254149198 | 0.22856217 |
| 0.254232179 | 0.25291161 |
| 0.338532153 | 0.25321778 |
| 0.615954158 | 0.16021217 |
| 0.398852436 | 0.18185631 |

|             |            |
|-------------|------------|
| 0.655192884 | 0.12711937 |
| 0.667148436 | 0.1235385  |
| 0.56918349  | 0.12892006 |
| 0.328253497 | 0.16637755 |
| 0.558156068 | 0.16216764 |
| 0.499043309 | 0.10498173 |
| 0.469221994 | 0.16796085 |
| 0.580220358 | 0.11901666 |
| 0.501525737 | 0.11692407 |
| 0.52862282  | 0.18228734 |
| 0.387384515 | 0.11909637 |
| 0.377983708 | 0.10885321 |
| 0.347425555 | 0.13555202 |
| 0.224627576 | 0.18437945 |
| 0.197569361 | 0.11638127 |
| 0.465432159 | 0.19743959 |
| 0.628252838 | 0.12366505 |
| 0.610748741 | 0.15261488 |
| 0.614947718 | 0.12700201 |
| 0.296026795 | 0.13584634 |
| 0.588265911 | 0.16696869 |
| 0.622456297 | 0.11228474 |
| 0.619356012 | 0.12656733 |
| 0.451018235 | 0.16734466 |
| 0.530347134 | 0.12307262 |
| 0.505127858 | 0.13437576 |
| 0.460545751 | 0.19629224 |
| 0.457764294 | 0.22726002 |
| 0.42505398  | 0.15406784 |
| 0.257269546 | 0.19960826 |
| 0.589680783 | 0.10584909 |
| 0.421197004 | 0.11466647 |
| 0.340671718 | 0.12090972 |
| 0.754046509 | 0.11292758 |
| 0.582017145 | 0.13220005 |
| 0.521811634 | 0.13349589 |
| 0.385583415 | 0.19521746 |
| 0.541872976 | 0.20749687 |
| 0.725828683 | 0.11063764 |
| 0.561167915 | 0.11816775 |
| 0.353704783 | 0.11715114 |
| 0.358918196 | 0.14775446 |
| 0.590681079 | 0.1668699  |
| 0.407580614 | 0.10092721 |
| 0.284339914 | 0.15385253 |
| 0.587583019 | 0.10166107 |

|             |            |
|-------------|------------|
| 0.496179021 | 0.12665614 |
| 0.650056742 | 0.1084932  |
| 0.415286744 | 0.14197144 |
| 0.23992699  | 0.10500127 |
| 0.390335661 | 0.22377077 |
| 0.348186025 | 0.12809971 |
| 0.241650285 | 0.22231611 |
| 0.235638754 | 0.12178392 |
| 0.212384353 | 0.12967348 |
| 0.201649788 | 0.13216418 |
| 0.42620971  | 0.1421711  |
| 0.630198905 | 0.10905663 |
| 0.497887073 | 0.14146661 |
| 0.708195963 | 0.11853742 |
| 0.319699807 | 0.10368423 |
| 0.712237763 | 0.10943116 |
| 0.167597975 | 0.10246732 |
| 0.557628348 | 0.13466094 |
| 0.368477718 | 0.15336    |
| 0.648994885 | 0.10530092 |
| 0.427122859 | 0.17068071 |
| 0.320043877 | 0.16908764 |
| 0.19789345  | 0.1040621  |
| 0.464963799 | 0.10787743 |
| 0.696632761 | 0.11406432 |
| 0.282598126 | 0.14290049 |
| 0.694739344 | 0.1679992  |
| 0.628675962 | 0.11512697 |
| 0.704570585 | 0.13342915 |
| 0.490637344 | 0.14048632 |
| 0.362202977 | 0.11429363 |
| 0.262135166 | 0.19840063 |
| 0.232060678 | 0.10134243 |
| 0.265195117 | 0.10819747 |
| 0.641325511 | 0.10423549 |
| 0.24703235  | 0.12879993 |
| 0.493577826 | 0.16489568 |
| 0.515413557 | 0.13084079 |
| 0.708078138 | 0.102538   |
| 0.615273026 | 0.12557438 |
| 0.551013954 | 0.13843828 |
| 0.696894965 | 0.18289106 |
| 0.609044804 | 0.10358265 |
| 0.651570106 | 0.11114787 |
| 0.739932693 | 0.11143794 |
| 0.74278224  | 0.11193373 |



|             |            |
|-------------|------------|
| 0.76292771  | 0.11896379 |
| 0.579915928 | 0.12106059 |
| 0.509365665 | 0.12365421 |
| 0.506234509 | 0.12969272 |
| 0.580012408 | 0.13951924 |
| 0.480166657 | 0.16261552 |
| 0.558616323 | 0.1752279  |
| 0.539050416 | 0.17727164 |
| 0.603309264 | 0.19120859 |
| 0.584346504 | 0.20199672 |
| 0.507008664 | 0.22115995 |
| 0.496714377 | 0.23243196 |
| 0.220774556 | 0.11593793 |
| 0.69588821  | 0.1251681  |
| 0.29011062  | 0.14939207 |
| 0.40701408  | 0.17682535 |
| 0.4829373   | 0.20869843 |
| 0.394392846 | 0.21442739 |
| 0.554961283 | 0.22325783 |
| 0.415937164 | 0.2262852  |
| 0.486059508 | 0.23186484 |
| 0.436680156 | 0.23480902 |
| 0.41959784  | 0.24275622 |
| 0.425466978 | 0.297982   |
| 0.537789243 | 0.16152047 |
| 0.56904483  | 0.17791935 |
| 0.617693665 | 0.12535557 |
| 0.526842499 | 0.15737286 |
| 0.575536251 | 0.12508966 |
| 0.388960971 | 0.17930204 |
| 0.617160191 | 0.11042481 |
| 0.574889878 | 0.15043837 |
| 0.574835674 | 0.17245635 |
| 0.749899636 | 0.1034841  |
| 0.569090025 | 0.18959461 |
| 0.5521554   | 0.10733611 |
| 0.539167681 | 0.11183426 |
| 0.589125783 | 0.15340542 |
| 0.318744978 | 0.18939823 |
| 0.466343025 | 0.16444653 |
| 0.567325811 | 0.14246483 |
| 0.687073182 | 0.10676292 |
| 0.288280274 | 0.13592399 |
| 0.600430447 | 0.11720126 |
| 0.260428499 | 0.10397819 |
| 0.359056123 | 0.13322563 |

|             |            |
|-------------|------------|
| 0.558040156 | 0.10192254 |
| 0.424741185 | 0.11018081 |
| 0.235614058 | 0.11459225 |
| 0.584345674 | 0.11459852 |
| 0.300455889 | 0.12444095 |
| 0.531596019 | 0.15124254 |
| 0.582729408 | 0.1675683  |
| 0.455642583 | 0.19614382 |
| 0.759719457 | 0.11358849 |
| 0.422695421 | 0.1421021  |
| 0.503465514 | 0.1517222  |
| 0.629874476 | 0.11932753 |
| 0.641888996 | 0.13005925 |
| 0.44556837  | 0.14240782 |
| 0.710760674 | 0.12723698 |
| 0.714382644 | 0.1740791  |
| 0.567558117 | 0.1012471  |
| 0.365381294 | 0.13291098 |
| 0.334438863 | 0.16175346 |
| 0.58311645  | 0.12043035 |
| 0.315503486 | 0.14653714 |
| 0.214003254 | 0.11903307 |
| 0.715842108 | 0.10020538 |
| 0.637604178 | 0.12079368 |
| 0.685335802 | 0.10636133 |
| 0.790051138 | 0.10981206 |
| 0.663745906 | 0.12605342 |
| 0.574420284 | 0.15900986 |
| 0.229619843 | 0.19246411 |
| 0.36371975  | 0.10895785 |
| 0.583540699 | 0.10098572 |
| 0.357178265 | 0.23161229 |
| 0.43614145  | 0.1938842  |
| 0.325597173 | 0.35826954 |
| 0.51963807  | 0.15194325 |
| 0.296221069 | 0.18740323 |
| 0.451913197 | 0.11975006 |
| 0.469590279 | 0.21331268 |
| 0.238297844 | 0.19524763 |
| 0.426735274 | 0.10239526 |
| 0.622412105 | 0.14609792 |
| 0.560443989 | 0.11845705 |
| 0.563222632 | 0.14738978 |
| 0.645924255 | 0.12238146 |
| 0.422579621 | 0.15722776 |
| 0.418438635 | 0.15090289 |

|             |            |
|-------------|------------|
| 0.34943873  | 0.188001   |
| 0.695343843 | 0.10381241 |
| 0.648570583 | 0.12628882 |
| 0.667693842 | 0.10078395 |
| 0.435830308 | 0.10205294 |
| 0.235877316 | 0.10513528 |
| 0.393962442 | 0.10525006 |
| 0.637555532 | 0.10723354 |
| 0.30001751  | 0.10752435 |
| 0.340930216 | 0.10765522 |
| 0.155605894 | 0.10827744 |
| 0.630149851 | 0.10986136 |
| 0.587879074 | 0.11453958 |
| 0.262551963 | 0.11521519 |
| 0.649639655 | 0.12172875 |
| 0.310223389 | 0.12205572 |
| 0.364177172 | 0.13042749 |
| 0.396144159 | 0.13122631 |
| 0.418371655 | 0.14233675 |
| 0.371289591 | 0.14773639 |
| 0.297323578 | 0.15167075 |
| 0.549328195 | 0.15807618 |
| 0.572388055 | 0.16506472 |
| 0.352254703 | 0.18393696 |
| 0.398237837 | 0.19045676 |
| 0.520707374 | 0.13442124 |
| 0.344395284 | 0.17590016 |
| 0.603143345 | 0.16820346 |
| 0.372910563 | 0.10205449 |
| 0.322668209 | 0.12676594 |
| 0.448629374 | 0.10468868 |
| 0.575853682 | 0.10492341 |
| 0.389424883 | 0.21847557 |
| 0.557128419 | 0.1469301  |
| 0.531688906 | 0.14122086 |
| 0.390043267 | 0.122381   |
| 0.693583363 | 0.13032204 |
| 0.415259518 | 0.15203951 |
| 0.285865493 | 0.11625739 |
| 0.786845084 | 0.10155546 |
| 0.482511771 | 0.25204549 |
| 0.179122916 | 0.11670465 |
| 0.427251779 | 0.13880047 |
| 0.605205674 | 0.13905119 |
| 0.540162927 | 0.10507823 |
| 0.551683046 | 0.17090486 |

|             |            |
|-------------|------------|
| 0.640690344 | 0.13808033 |
| 0.604284793 | 0.14288609 |
| 0.664364576 | 0.16190667 |
| 0.457285802 | 0.13126969 |
| 0.716479145 | 0.12432056 |
| 0.231250332 | 0.12934618 |
| 0.502780263 | 0.22104376 |
| 0.603922966 | 0.11033375 |
| 0.568599035 | 0.11412748 |
| 0.709348071 | 0.1037288  |
| 0.201039546 | 0.1009899  |
| 0.54832108  | 0.15308833 |
| 0.504560975 | 0.10841949 |
| 0.394988005 | 0.19180887 |
| 0.512957821 | 0.10595658 |
| 0.687691419 | 0.11493464 |
| 0.503106442 | 0.18127151 |
| 0.333267006 | 0.14128746 |
| 0.348749446 | 0.15341174 |
| 0.460209183 | 0.19342796 |
| 0.588501504 | 0.18693916 |
| 0.467835008 | 0.14892675 |
| 0.570834759 | 0.21083924 |
| 0.61669058  | 0.15644662 |
| 0.595117791 | 0.10183059 |
| 0.75627711  | 0.10072917 |
| 0.219012408 | 0.18247723 |
| 0.823540661 | 0.10050634 |
| 0.672900878 | 0.12003402 |
| 0.435742939 | 0.12980671 |
| 0.680633122 | 0.14719264 |
| 0.492334135 | 0.17835713 |
| 0.56882101  | 0.22773873 |
| 0.528995415 | 0.23207059 |
| 0.420103042 | 0.29605675 |
| 0.514201303 | 0.10117271 |
| 0.41968995  | 0.11470332 |
| 0.465645821 | 0.1544881  |
| 0.298697136 | 0.12894474 |
| 0.576346811 | 0.11864801 |
| 0.375292693 | 0.2184866  |
| 0.630383387 | 0.11358884 |
| 0.307722608 | 0.1324512  |
| 0.610208209 | 0.11725324 |
| 0.666779407 | 0.15946411 |
| 0.137673108 | 0.12378325 |

|             |            |
|-------------|------------|
| 0.10672173  | 0.14174236 |
| 0.530445504 | 0.22472113 |
| 0.31371861  | 0.10276409 |
| 0.404708022 | 0.1286855  |
| 0.260699453 | 0.13340525 |
| 0.503688111 | 0.1579019  |
| 0.546608094 | 0.11314649 |
| 0.332962538 | 0.11236262 |
| 0.309374405 | 0.15755651 |
| 0.68710498  | 0.1095314  |
| 0.453791465 | 0.1625781  |
| 0.330858325 | 0.13352485 |
| 0.522362976 | 0.10054088 |
| 0.485233665 | 0.15627719 |
| 0.450545761 | 0.20306936 |
| 0.582488048 | 0.24830828 |
| 0.741511742 | 0.11894768 |
| 0.537134552 | 0.19531265 |
| 0.680339605 | 0.12093403 |
| 0.527566518 | 0.1192829  |
| 0.367179709 | 0.16553258 |
| 0.574490705 | 0.15763765 |
| 0.484984866 | 0.15812059 |
| 0.349295949 | 0.12882594 |
| 0.404373812 | 0.13396927 |
| 0.496057551 | 0.12829462 |
| 0.671640531 | 0.10190363 |
| 0.339955374 | 0.12967631 |
| 0.495087129 | 0.17245817 |
| 0.357317662 | 0.17654207 |
| 0.367873765 | 0.1836331  |
| 0.330760063 | 0.25522518 |
| 0.458502993 | 0.26933847 |
| 0.493436365 | 0.16898245 |
| 0.678859745 | 0.17240778 |
| 0.473466964 | 0.1197321  |
| 0.347803675 | 0.19398394 |
| 0.30216536  | 0.10710595 |
| 0.185788046 | 0.10939987 |
| 0.216116094 | 0.12156953 |
| 0.458474234 | 0.24088153 |
| 0.493851613 | 0.1628188  |
| 0.338351578 | 0.1942804  |
| 0.220822795 | 0.20057118 |
| 0.406535506 | 0.14964198 |
| 0.545603526 | 0.15960668 |

|             |            |
|-------------|------------|
| 0.388610045 | 0.19416682 |
| 0.128217613 | 0.11153611 |
| 0.332759735 | 0.14745568 |
| 0.379591985 | 0.12315509 |
| 0.496197333 | 0.19872119 |
| 0.381245308 | 0.11300921 |
| 0.486710022 | 0.1292085  |
| 0.347938124 | 0.15667819 |
| 0.353980909 | 0.2290785  |
| 0.751411033 | 0.1188155  |
| 0.311224339 | 0.13854711 |
| 0.193258336 | 0.11135425 |
| 0.487289942 | 0.17250075 |
| 0.356423957 | 0.17788893 |
| 0.63435635  | 0.10987374 |
| 0.21508013  | 0.11007775 |
| 0.267067514 | 0.14694863 |
| 0.206107844 | 0.13165363 |
| 0.465026565 | 0.14795479 |
| 0.496502208 | 0.1388491  |
| 0.709066279 | 0.11547302 |
| 0.41680865  | 0.16172238 |
| 0.419921228 | 0.1038146  |
| 0.309739962 | 0.14255246 |
| 0.395310314 | 0.12150507 |
| 0.72325717  | 0.13379757 |
| 0.376403763 | 0.20494364 |
| 0.579210866 | 0.13829713 |
| 0.426339858 | 0.1237452  |
| 0.155907996 | 0.16256852 |
| 0.391798422 | 0.10383744 |
| 0.684561455 | 0.1032471  |
| 0.560477166 | 0.15327302 |
| 0.280848009 | 0.17205494 |
| 0.561633975 | 0.12976405 |
| 0.673075804 | 0.1065138  |
| 0.652484307 | 0.16593301 |
| 0.133158323 | 0.101704   |
| 0.762157933 | 0.12034333 |
| 0.364958153 | 0.12124542 |
| 0.297324303 | 0.18842495 |
| 0.080556873 | 0.13453814 |
| 0.511376795 | 0.19415168 |
| 0.630031295 | 0.12604667 |
| 0.497119524 | 0.12899451 |
| 0.765902202 | 0.11467045 |

|             |            |
|-------------|------------|
| 0.136050158 | 0.10496157 |
| 0.597879192 | 0.161382   |
| 0.407502438 | 0.25744874 |
| 0.771196304 | 0.12674659 |
| 0.695635103 | 0.15066273 |
| 0.478227107 | 0.15077258 |
| 0.553114909 | 0.16729514 |
| 0.448447721 | 0.11385496 |
| 0.28776923  | 0.16610967 |
| 0.2168284   | 0.11210595 |
| 0.478841151 | 0.1926999  |
| 0.445441396 | 0.14608263 |
| 0.281759033 | 0.1570073  |
| 0.563072901 | 0.20935417 |
| 0.456119771 | 0.10130782 |
| 0.358021104 | 0.18584512 |
| 0.384999743 | 0.11017527 |
| 0.7517321   | 0.11111996 |
| 0.313070283 | 0.17345339 |
| 0.373807724 | 0.18131815 |
| 0.370002484 | 0.26803733 |
| 0.102268092 | 0.13736221 |
| 0.367541667 | 0.23902164 |
| 0.296965117 | 0.31401968 |
| 0.727494699 | 0.10443582 |
| 0.565999326 | 0.10625093 |
| 0.630350445 | 0.15638671 |
| 0.465550845 | 0.20403449 |
| 0.702333519 | 0.10557083 |
| 0.46084795  | 0.21058063 |
| 0.530289666 | 0.25478336 |
| 0.383877562 | 0.10408647 |
| 0.565329882 | 0.17289788 |
| 0.543941759 | 0.18281609 |
| 0.497535695 | 0.13503645 |
| 0.183190762 | 0.19340191 |
| 0.330793725 | 0.20733545 |
| 0.236131526 | 0.12097748 |
| 0.600135151 | 0.16437875 |
| 0.473386101 | 0.1311041  |
| 0.484422453 | 0.14731759 |
| 0.23657363  | 0.12568099 |
| 0.30710331  | 0.13060485 |
| 0.307285393 | 0.13663894 |
| 0.351519224 | 0.19930186 |
| 0.283649163 | 0.24636562 |

|             |            |
|-------------|------------|
| 0.428875734 | 0.20257181 |
| 0.23483952  | 0.12653217 |
| 0.485618011 | 0.11855737 |
| 0.610129928 | 0.16283478 |
| 0.581375674 | 0.12317555 |
| 0.145511134 | 0.14715369 |
| 0.704783363 | 0.13880203 |
| 0.166252327 | 0.21073478 |
| 0.198006893 | 0.1189078  |
| 0.485329082 | 0.14441972 |
| 0.211081664 | 0.26562538 |
| 0.51425913  | 0.15258121 |
| 0.542277139 | 0.10892547 |
| 0.34414488  | 0.10951422 |
| 0.727291489 | 0.11017536 |
| 0.234652989 | 0.21106618 |
| 0.589463054 | 0.12317836 |
| 0.597985517 | 0.12354625 |
| 0.59067752  | 0.13056297 |
| 0.366497731 | 0.10204301 |
| 0.670162719 | 0.10153195 |
| 0.226007117 | 0.15048426 |
| 0.369863997 | 0.15398802 |
| 0.445393422 | 0.18779257 |
| 0.620946876 | 0.14657098 |
| 0.443371606 | 0.24275061 |
| 0.579318757 | 0.19652638 |
| 0.486264399 | 0.12695201 |
| 0.618301143 | 0.12196395 |
| 0.335307367 | 0.13952858 |
| 0.422705542 | 0.11593379 |
| 0.154974768 | 0.10028527 |
| 0.242909267 | 0.11808879 |
| 0.501562193 | 0.13408674 |
| 0.31736032  | 0.17295492 |
| 0.265934329 | 0.17457172 |
| 0.555646641 | 0.15166008 |
| 0.55208996  | 0.13173846 |
| 0.277999097 | 0.13100328 |
| 0.200684214 | 0.17116794 |
| 0.753405555 | 0.11997137 |
| 0.563278207 | 0.10553758 |
| 0.276733981 | 0.1332697  |
| 0.743162637 | 0.13773781 |
| 0.30666415  | 0.14972859 |
| 0.345320266 | 0.11204179 |



|             |            |
|-------------|------------|
| 0.585296618 | 0.17691317 |
| 0.62224875  | 0.14840399 |
| 0.392413139 | 0.12235408 |
| 0.312518456 | 0.19969335 |
| 0.254813702 | 0.10831193 |
| 0.557320335 | 0.14328932 |
| 0.25837527  | 0.16951686 |
| 0.503226229 | 0.12898204 |
| 0.714221459 | 0.13254037 |
| 0.178943762 | 0.18958205 |
| 0.498726635 | 0.12132404 |
| 0.184987835 | 0.23417622 |
| 0.37837998  | 0.20774158 |
| 0.322614206 | 0.21195599 |
| 0.708790484 | 0.10396782 |
| 0.688097814 | 0.1387627  |
| 0.618520359 | 0.10166111 |
| 0.470055082 | 0.12276683 |
| 0.474347709 | 0.15588862 |
| 0.577812552 | 0.10786214 |
| 0.729268495 | 0.11462228 |
| 0.448188274 | 0.12670514 |
| 0.749957915 | 0.1094054  |
| 0.658350819 | 0.11374402 |
| 0.245977606 | 0.12326471 |
| 0.323272819 | 0.13269288 |
| 0.689264093 | 0.14482471 |
| 0.262104364 | 0.15257907 |
| 0.622101048 | 0.1588006  |
| 0.331667628 | 0.16483986 |
| 0.586332177 | 0.16719836 |
| 0.481547197 | 0.18473972 |
| 0.406661211 | 0.19953182 |
| 0.718054046 | 0.12288844 |
| 0.623618866 | 0.15608755 |
| 0.139873518 | 0.14236638 |
| 0.263953854 | 0.25365124 |
| 0.230410279 | 0.20147531 |
| 0.513086269 | 0.23291276 |
| 0.344494141 | 0.10664411 |
| 0.616147016 | 0.12736457 |
| 0.337773277 | 0.14422807 |
| 0.098022262 | 0.13392507 |
| 0.410228807 | 0.26821328 |
| 0.463173458 | 0.14890921 |
| 0.596189148 | 0.15924451 |

|             |            |
|-------------|------------|
| 0.584997186 | 0.21358842 |
| 0.322801289 | 0.15316011 |
| 0.779178134 | 0.11183825 |
| 0.594479787 | 0.18710853 |
| 0.708366075 | 0.10000491 |
| 0.78134519  | 0.1217607  |
| 0.328988743 | 0.23925889 |
| 0.269861641 | 0.29770906 |
| 0.679690986 | 0.16661008 |
| 0.241860674 | 0.10748162 |
| 0.144287972 | 0.11212831 |
| 0.499109891 | 0.12116786 |
| 0.579799001 | 0.13015097 |
| 0.784770819 | 0.10653392 |
| 0.690419085 | 0.13805846 |
| 0.65443252  | 0.14016516 |
| 0.694533349 | 0.15704622 |
| 0.356885621 | 0.15918852 |
| 0.459635642 | 0.16232772 |
| 0.150527796 | 0.20644753 |
| 0.358139264 | 0.1539463  |
| 0.195059236 | 0.10645975 |
| 0.486977305 | 0.12012811 |
| 0.571092801 | 0.1035903  |
| 0.347020804 | 0.13321461 |
| 0.502212063 | 0.18602665 |
| 0.415334776 | 0.13476222 |
| 0.332099611 | 0.13811645 |
| 0.218332329 | 0.16442536 |
| 0.45940846  | 0.17576124 |
| 0.189110108 | 0.14214909 |
| 0.518255638 | 0.13360905 |
| 0.510452594 | 0.15267281 |
| 0.264284165 | 0.16912719 |
| 0.686108951 | 0.10217988 |
| 0.263559219 | 0.10443338 |
| 0.379277257 | 0.11487079 |
| 0.713993536 | 0.11794813 |
| 0.593488901 | 0.12559297 |
| 0.666991924 | 0.12886304 |
| 0.667857446 | 0.16203041 |
| 0.44984545  | 0.16848593 |
| 0.566620698 | 0.19328102 |
| 0.410210006 | 0.19838701 |
| 0.50852211  | 0.20271515 |
| 0.480610522 | 0.21120722 |

|             |            |
|-------------|------------|
| 0.409887107 | 0.2810942  |
| 0.299217803 | 0.29795642 |
| 0.44132287  | 0.32794841 |
| 0.348840649 | 0.34452583 |
| 0.443799563 | 0.36142705 |
| 0.729745169 | 0.12453338 |
| 0.602877818 | 0.17741668 |
| 0.54692835  | 0.18664079 |
| 0.262716719 | 0.10161423 |
| 0.174190462 | 0.12136706 |
| 0.694615188 | 0.1131421  |
| 0.562175682 | 0.13097423 |
| 0.592055161 | 0.16204508 |
| 0.245992117 | 0.17441194 |
| 0.518737495 | 0.12572069 |
| 0.346072943 | 0.11903791 |
| 0.698116351 | 0.11961562 |
| 0.429411691 | 0.10083213 |
| 0.185765956 | 0.13305092 |
| 0.467773144 | 0.133626   |
| 0.391453245 | 0.14854027 |
| 0.396115414 | 0.15591365 |
| 0.484838714 | 0.12669932 |
| 0.621419234 | 0.14926629 |
| 0.545211271 | 0.13499761 |
| 0.62552604  | 0.11890824 |
| 0.246955591 | 0.19836417 |
| 0.420150365 | 0.14982868 |
| 0.421650552 | 0.20798929 |
| 0.315032466 | 0.21829376 |
| 0.57301691  | 0.10570515 |
| 0.587977116 | 0.11238849 |
| 0.34540033  | 0.11222592 |
| 0.555905283 | 0.15952373 |
| 0.698367012 | 0.11472552 |
| 0.634538346 | 0.11757976 |
| 0.419007032 | 0.11950054 |
| 0.380337558 | 0.22803131 |
| 0.170774107 | 0.11184416 |
| 0.461455163 | 0.15456575 |
| 0.33408667  | 0.15082729 |
| 0.334645484 | 0.11166271 |
| 0.445485107 | 0.20479466 |
| 0.372677813 | 0.15130863 |
| 0.480643896 | 0.16545941 |
| 0.424828232 | 0.1780799  |

|             |            |
|-------------|------------|
| 0.148211991 | 0.10700877 |
| 0.354746897 | 0.19477767 |
| 0.798195013 | 0.10704615 |
| 0.479703609 | 0.11063477 |
| 0.292025903 | 0.10442976 |
| 0.630046194 | 0.11953636 |
| 0.615737432 | 0.11080536 |
| 0.34560951  | 0.11468836 |
| 0.181524399 | 0.13449045 |
| 0.249895319 | 0.18734756 |
| 0.380770652 | 0.22927267 |
| 0.215504355 | 0.13032856 |
| 0.678583182 | 0.12464507 |
| 0.122235637 | 0.1294565  |
| 0.336535303 | 0.16505315 |
| 0.64102865  | 0.12530255 |
| 0.548957785 | 0.13502031 |
| 0.311824302 | 0.15540533 |
| 0.675595843 | 0.11225868 |
| 0.49974666  | 0.11036417 |
| 0.542434122 | 0.1127432  |
| 0.665770719 | 0.14055845 |
| 0.583188505 | 0.12846857 |
| 0.221272547 | 0.12221515 |
| 0.262191417 | 0.24196086 |
| 0.570563847 | 0.15334084 |
| 0.151175575 | 0.10685873 |
| 0.240545516 | 0.14397053 |
| 0.639062043 | 0.11014423 |
| 0.544068789 | 0.12780258 |
| 0.382748468 | 0.14057928 |
| 0.419646773 | 0.12236837 |
| 0.140587819 | 0.10516071 |
| 0.242133821 | 0.14291159 |
| 0.461834507 | 0.17977924 |
| 0.526830665 | 0.23930406 |
| 0.549691684 | 0.15371482 |
| 0.35222044  | 0.24569104 |
| 0.582857962 | 0.10024055 |
| 0.320164834 | 0.12330238 |
| 0.415747131 | 0.10051372 |
| 0.549790702 | 0.11761264 |
| 0.606743161 | 0.10539718 |
| 0.206772445 | 0.14697529 |
| 0.582274262 | 0.14271052 |
| 0.302339831 | 0.16029802 |

|             |            |
|-------------|------------|
| 0.512496223 | 0.11061983 |
| 0.320682692 | 0.24267565 |
| 0.501382737 | 0.13002404 |
| 0.297745501 | 0.18888266 |
| 0.299335274 | 0.10768743 |
| 0.63298035  | 0.14226567 |
| 0.391419861 | 0.17273636 |
| 0.63436132  | 0.11070131 |
| 0.49701883  | 0.18837854 |
| 0.489790771 | 0.12518768 |
| 0.08687039  | 0.12623922 |
| 0.538694686 | 0.23137127 |
| 0.260502608 | 0.24794934 |
| 0.236912823 | 0.12531508 |
| 0.481082707 | 0.11040316 |
| 0.543640733 | 0.12172117 |
| 0.118835136 | 0.12344443 |
| 0.305094586 | 0.26921061 |
| 0.433035763 | 0.17141349 |
| 0.510640489 | 0.15990312 |
| 0.104189928 | 0.11621822 |
| 0.532335397 | 0.19546657 |
| 0.555798646 | 0.14092219 |
| 0.743546863 | 0.11189963 |
| 0.45438569  | 0.12821121 |
| 0.286201544 | 0.1517942  |
| 0.329298441 | 0.210173   |
| 0.476668999 | 0.21715012 |
| 0.260028999 | 0.38561834 |
| 0.741111054 | 0.10613131 |
| 0.415018169 | 0.13094002 |
| 0.672825404 | 0.11411136 |
| 0.701008838 | 0.1595441  |
| 0.409164469 | 0.18094003 |
| 0.562401141 | 0.16583638 |
| 0.04035489  | 0.18011413 |
| 0.252379075 | 0.10703154 |
| 0.311742777 | 0.13281741 |
| 0.684275171 | 0.15888377 |
| 0.196066863 | 0.10256247 |
| 0.084343855 | 0.1021801  |
| 0.505232208 | 0.11208439 |
| 0.664629089 | 0.1025002  |
| 0.276750133 | 0.16495062 |
| 0.74740708  | 0.10166822 |
| 0.229257051 | 0.10246339 |

|             |            |
|-------------|------------|
| 0.381065235 | 0.1665547  |
| 0.491072921 | 0.16013424 |
| 0.671582932 | 0.14460785 |
| 0.281389609 | 0.1014102  |
| 0.685210586 | 0.10275844 |
| 0.618012137 | 0.12399098 |
| 0.463193224 | 0.13963234 |
| 0.608694859 | 0.10589261 |
| 0.42375732  | 0.10572388 |
| 0.744431338 | 0.111733   |
| 0.521021934 | 0.12929397 |
| 0.37442969  | 0.13371325 |
| 0.542501294 | 0.24064488 |
| 0.195128066 | 0.12715754 |
| 0.195462026 | 0.11443265 |
| 0.610045398 | 0.146497   |
| 0.537749155 | 0.19538246 |
| 0.534041755 | 0.21014459 |
| 0.220184876 | 0.11640752 |
| 0.722106274 | 0.13931932 |
| 0.641159898 | 0.13898631 |
| 0.57422621  | 0.10946338 |
| 0.550139539 | 0.1293367  |
| 0.379511336 | 0.21333517 |
| 0.121003181 | 0.12180879 |
| 0.318647676 | 0.127286   |
| 0.242581797 | 0.19740207 |
| 0.623909671 | 0.11319617 |
| 0.609762143 | 0.12289004 |
| 0.272422095 | 0.19454318 |
| 0.376037562 | 0.16506418 |
| 0.321118141 | 0.11332182 |
| 0.738810177 | 0.10705713 |
| 0.733500669 | 0.10104003 |
| 0.452377932 | 0.13364561 |
| 0.376048522 | 0.14032475 |
| 0.278572404 | 0.23432738 |
| 0.499998425 | 0.21542914 |
| 0.720526883 | 0.11628183 |
| 0.672708177 | 0.1243907  |
| 0.752109076 | 0.1244062  |
| 0.399378935 | 0.12788776 |
| 0.419915995 | 0.15031001 |
| 0.429905035 | 0.18825497 |
| 0.551500764 | 0.11156848 |
| 0.308923131 | 0.1277329  |

|             |            |
|-------------|------------|
| 0.236897604 | 0.1498964  |
| 0.500011085 | 0.10062722 |
| 0.712454844 | 0.10738206 |
| 0.706029756 | 0.11002172 |
| 0.644537352 | 0.11112761 |
| 0.377141593 | 0.12566572 |
| 0.36496725  | 0.1280312  |
| 0.280074302 | 0.1581228  |
| 0.542215279 | 0.16520125 |
| 0.59180573  | 0.10309666 |
| 0.22936828  | 0.20008517 |
| 0.241884939 | 0.19446711 |
| 0.339655067 | 0.1362789  |
| 0.39380378  | 0.2547717  |
| 0.28559639  | 0.10970197 |
| 0.436218868 | 0.18411009 |
| 0.770835588 | 0.10587048 |
| 0.70612394  | 0.12787354 |
| 0.527750745 | 0.12778743 |
| 0.639188273 | 0.12642763 |
| 0.410744354 | 0.15650367 |
| 0.276865294 | 0.10645181 |
| 0.233645418 | 0.10651486 |
| 0.327430343 | 0.12244131 |
| 0.677826996 | 0.17727464 |
| 0.671076512 | 0.16809325 |
| 0.598199441 | 0.10637805 |
| 0.670755036 | 0.12302397 |
| 0.339861544 | 0.15647563 |
| 0.508654322 | 0.13967769 |
| 0.458598568 | 0.25307623 |
| 0.318065111 | 0.13917278 |
| 0.560391376 | 0.10989054 |
| 0.470606247 | 0.20627048 |
| 0.180874167 | 0.21141172 |
| 0.327666042 | 0.21008516 |
| 0.648568965 | 0.10124584 |
| 0.373586079 | 0.16516573 |
| 0.613610403 | 0.11111776 |
| 0.502950948 | 0.12705802 |
| 0.144409208 | 0.15134964 |
| 0.515117883 | 0.11667682 |
| 0.634791632 | 0.20005598 |
| 0.519773508 | 0.18461581 |
| 0.638915975 | 0.10171231 |
| 0.454017824 | 0.11408273 |

|             |            |
|-------------|------------|
| 0.219070944 | 0.21732997 |
| 0.733402207 | 0.12788059 |
| 0.388505762 | 0.25697687 |
| 0.252226147 | 0.21279227 |
| 0.302310984 | 0.11503961 |
| 0.32285073  | 0.1469553  |
| 0.086594552 | 0.10552748 |
| 0.643100005 | 0.16946389 |
| 0.54006721  | 0.14050274 |
| 0.224950311 | 0.10567486 |
| 0.619354924 | 0.12669151 |
| 0.578309902 | 0.25609985 |
| 0.53316613  | 0.10551431 |
| 0.291816948 | 0.13302275 |
| 0.348207537 | 0.20042066 |
| 0.348242331 | 0.13984967 |
| 0.700037399 | 0.10066564 |
| 0.225294032 | 0.16801144 |
| 0.70973849  | 0.11895892 |
| 0.249574083 | 0.10082477 |
| 0.428163677 | 0.11750897 |
| 0.165866855 | 0.12011873 |
| 0.3735807   | 0.15514537 |
| 0.218375869 | 0.1067612  |
| 0.364772663 | 0.12230142 |
| 0.646996455 | 0.13062492 |
| 0.213348168 | 0.18368949 |
| 0.452228177 | 0.15265269 |
| 0.426629102 | 0.19708771 |
| 0.254503677 | 0.16759743 |
| 0.586310354 | 0.1202089  |
| 0.414990863 | 0.16683606 |
| 0.402866047 | 0.12636125 |
| 0.291823624 | 0.18024216 |
| 0.185571896 | 0.12027646 |
| 0.448257813 | 0.24755996 |
| 0.543757068 | 0.1644261  |
| 0.490723408 | 0.18797335 |
| 0.57697971  | 0.10613437 |
| 0.526775512 | 0.2565441  |
| 0.551885855 | 0.10915566 |
| 0.205602398 | 0.14811063 |
| 0.517128521 | 0.108628   |
| 0.711636732 | 0.13002941 |
| 0.274378967 | 0.16124051 |
| 0.277103853 | 0.18963941 |



|             |            |
|-------------|------------|
| 0.697323503 | 0.13637477 |
| 0.525249373 | 0.16723887 |
| 0.587365234 | 0.25108134 |
| 0.335917145 | 0.16804571 |
| 0.44565149  | 0.13770173 |
| 0.160359451 | 0.14841401 |
| 0.305637638 | 0.15596443 |
| 0.600566845 | 0.1471334  |
| 0.288243484 | 0.14301864 |
| 0.372256774 | 0.17926052 |
| 0.183094197 | 0.11780187 |
| 0.547644968 | 0.14356002 |
| 0.66682454  | 0.10619674 |
| 0.647057779 | 0.13179521 |
| 0.422857707 | 0.14228686 |
| 0.50127496  | 0.12348921 |
| 0.642048509 | 0.12403907 |
| 0.669881108 | 0.13718325 |
| 0.653804409 | 0.13853463 |
| 0.31323293  | 0.10468207 |
| 0.373435367 | 0.17694485 |
| 0.411535176 | 0.10460798 |
| 0.665301656 | 0.1246153  |
| 0.678574189 | 0.13674345 |
| 0.352881255 | 0.14767453 |
| 0.383269841 | 0.22482946 |
| 0.692014403 | 0.11314032 |
| 0.408369627 | 0.12777219 |
| 0.690670412 | 0.13549263 |
| 0.616757343 | 0.10621337 |
| 0.252761432 | 0.10139911 |
| 0.58953044  | 0.12338459 |
| 0.453449566 | 0.12661746 |
| 0.245894545 | 0.12076355 |
| 0.537188722 | 0.21531636 |
| 0.291577844 | 0.19409816 |
| 0.429060481 | 0.1924781  |
| 0.601023857 | 0.11909378 |
| 0.280164994 | 0.14423469 |
| 0.448262879 | 0.17214928 |
| 0.51376629  | 0.24707509 |
| 0.366392567 | 0.32686031 |
| 0.647120011 | 0.12256789 |
| 0.186039561 | 0.13939085 |
| 0.737225261 | 0.12507227 |
| 0.712201261 | 0.10451278 |

|             |            |
|-------------|------------|
| 0.345221188 | 0.14737008 |
| 0.247880632 | 0.13556715 |
| 0.734302532 | 0.10045789 |
| 0.13723994  | 0.11315172 |
| 0.336107944 | 0.12632677 |
| 0.186966008 | 0.10675991 |
| 0.195801179 | 0.16389649 |
| 0.135430006 | 0.1170255  |
| 0.32213671  | 0.13915361 |
| 0.492952462 | 0.13920428 |
| 0.278231199 | 0.12569818 |
| 0.566030649 | 0.10985314 |
| 0.697404577 | 0.11859113 |
| 0.569935257 | 0.15145021 |
| 0.083328138 | 0.12024793 |
| 0.308586814 | 0.14677317 |
| 0.152542353 | 0.31215941 |
| 0.362489586 | 0.16234413 |
| 0.751591041 | 0.10533485 |
| 0.245885971 | 0.14364549 |
| 0.466371841 | 0.17028991 |
| 0.415647116 | 0.17332117 |
| 0.620482727 | 0.12763365 |
| 0.213691401 | 0.12843073 |
| 0.37961955  | 0.2434045  |
| 0.413304008 | 0.14468549 |
| 0.340279873 | 0.17836328 |
| 0.594629865 | 0.10955572 |
| 0.300171043 | 0.12140364 |
| 0.580737395 | 0.24048137 |
| 0.437233964 | 0.12821059 |
| 0.622815489 | 0.13248807 |
| 0.191553948 | 0.1075394  |
| 0.593643822 | 0.1073419  |
| 0.349278379 | 0.1191768  |
| 0.457601602 | 0.12458427 |
| 0.717188187 | 0.14219906 |
| 0.655653514 | 0.15125791 |
| 0.619071435 | 0.14977911 |
| 0.344115076 | 0.11555777 |
| 0.465723952 | 0.11003376 |
| 0.635775877 | 0.13522301 |
| 0.439064175 | 0.14777288 |
| 0.516733497 | 0.11129059 |
| 0.217236779 | 0.1724893  |
| 0.336458725 | 0.1436269  |

|             |            |
|-------------|------------|
| 0.753094469 | 0.10199749 |
| 0.500554387 | 0.10718885 |
| 0.47175724  | 0.11178693 |
| 0.575962908 | 0.13299173 |
| 0.223668505 | 0.16443847 |
| 0.615244076 | 0.16540422 |
| 0.597384076 | 0.18980164 |
| 0.588246116 | 0.11405683 |
| 0.215138295 | 0.11889894 |
| 0.671466779 | 0.10202148 |
| 0.525904588 | 0.11229636 |
| 0.47718146  | 0.11892327 |
| 0.491441327 | 0.14824826 |
| 0.435189934 | 0.11536526 |
| 0.453999286 | 0.10206127 |
| 0.715065448 | 0.10542115 |
| 0.225807256 | 0.10401523 |
| 0.468195716 | 0.10223103 |
| 0.454323756 | 0.10797312 |
| 0.695148828 | 0.11354173 |
| 0.302546315 | 0.10682438 |
| 0.104330226 | 0.12059041 |
| 0.104739691 | 0.15850952 |
| 0.499235387 | 0.20273064 |
| 0.221404137 | 0.2228358  |
| 0.337823657 | 0.23469112 |
| 0.176361275 | 0.16376307 |
| 0.274089349 | 0.2235361  |
| 0.412783744 | 0.12869573 |
| 0.603567252 | 0.14114537 |
| 0.596201702 | 0.14399664 |
| 0.20562048  | 0.11394845 |
| 0.619458139 | 0.13109343 |
| 0.375971984 | 0.13911565 |
| 0.436400675 | 0.11837117 |
| 0.193485876 | 0.13077511 |
| 0.807261622 | 0.10389056 |
| 0.535261532 | 0.13275661 |
| 0.552574414 | 0.1507594  |
| 0.32388981  | 0.11191232 |
| 0.683923004 | 0.15253478 |
| 0.615039493 | 0.13418053 |
| 0.326160336 | 0.13040957 |
| 0.577790293 | 0.11672092 |
| 0.44242198  | 0.15759275 |
| 0.491273181 | 0.12238671 |

|             |            |
|-------------|------------|
| 0.296735091 | 0.20916328 |
| 0.367880421 | 0.2634564  |
| 0.377595051 | 0.12329977 |
| 0.315831016 | 0.13580593 |
| 0.643932929 | 0.13859713 |
| 0.444458977 | 0.13051641 |
| 0.517905058 | 0.15511794 |
| 0.294003412 | 0.11328504 |
| 0.439453276 | 0.15098843 |
| 0.249307644 | 0.10064545 |
| 0.168372491 | 0.10784548 |
| 0.524201062 | 0.22042908 |
| 0.65121082  | 0.11249222 |
| 0.680628359 | 0.121653   |
| 0.460791696 | 0.16376316 |
| 0.602104992 | 0.18946234 |
| 0.299316511 | 0.14792531 |
| 0.278837713 | 0.17272514 |
| 0.376562023 | 0.17955588 |
| 0.485170664 | 0.10384316 |
| 0.25353097  | 0.11639954 |
| 0.455022577 | 0.12840366 |
| 0.369394678 | 0.12935583 |
| 0.271571511 | 0.18572095 |
| 0.459157024 | 0.18806456 |
| 0.261509627 | 0.11919627 |
| 0.499948229 | 0.13223106 |
| 0.382358088 | 0.14549896 |
| 0.635373454 | 0.11591584 |
| 0.349449414 | 0.15198906 |
| 0.443334686 | 0.26778447 |
| 0.325208486 | 0.13858727 |
| 0.725738963 | 0.14154947 |
| 0.206499358 | 0.19784512 |
| 0.45009651  | 0.19932376 |
| 0.482086147 | 0.18710276 |
| 0.500523562 | 0.19397931 |
| 0.221174547 | 0.12944498 |
| 0.701523924 | 0.13422878 |
| 0.505558321 | 0.18590298 |
| 0.566815745 | 0.11538087 |
| 0.626921318 | 0.24756068 |
| 0.663068472 | 0.13637036 |
| 0.593596442 | 0.18573215 |
| 0.765762308 | 0.10015747 |
| 0.606411815 | 0.1004367  |

|             |            |
|-------------|------------|
| 0.090942348 | 0.10147458 |
| 0.603738157 | 0.15392001 |
| 0.166506032 | 0.11871741 |
| 0.553870235 | 0.22601036 |
| 0.131161499 | 0.11470359 |
| 0.461883069 | 0.14052504 |
| 0.594280292 | 0.10058907 |
| 0.513603412 | 0.20575341 |
| 0.695765543 | 0.10144943 |
| 0.683618506 | 0.109374   |
| 0.660859504 | 0.14843363 |
| 0.378840837 | 0.14025127 |
| 0.403450883 | 0.1013501  |
| 0.678272721 | 0.11357034 |
| 0.506366179 | 0.10529854 |
| 0.522045937 | 0.11315238 |
| 0.426867178 | 0.16944789 |
| 0.236651595 | 0.11244531 |
| 0.437436146 | 0.24646789 |
| 0.633388991 | 0.1292696  |
| 0.572977204 | 0.10600846 |
| 0.503283248 | 0.1165703  |
| 0.668534848 | 0.13570533 |
| 0.619869381 | 0.11168171 |
| 0.518964574 | 0.14784419 |
| 0.635000727 | 0.14300757 |
| 0.345228167 | 0.16675372 |
| 0.310722153 | 0.27216633 |
| 0.397725548 | 0.30029446 |
| 0.379876308 | 0.12087892 |
| 0.263043056 | 0.12633284 |
| 0.426878119 | 0.12677673 |
| 0.512562387 | 0.11314016 |
| 0.405100125 | 0.12209094 |
| 0.499020797 | 0.12757664 |
| 0.670087028 | 0.13424513 |
| 0.264411414 | 0.14086276 |
| 0.623781593 | 0.15379965 |
| 0.520975245 | 0.1600329  |
| 0.613730249 | 0.13672351 |
| 0.359495801 | 0.13997535 |
| 0.58686183  | 0.11597889 |
| 0.497380379 | 0.14292551 |
| 0.738766739 | 0.10230148 |
| 0.366525071 | 0.1439404  |
| 0.287686019 | 0.14744912 |

|             |            |
|-------------|------------|
| 0.531641803 | 0.16365723 |
| 0.777504542 | 0.12020879 |
| 0.357161858 | 0.14360964 |
| 0.37370322  | 0.13755774 |
| 0.455415194 | 0.17275432 |
| 0.312065593 | 0.15796802 |
| 0.418763579 | 0.18838862 |
| 0.314247484 | 0.23394113 |
| 0.389047347 | 0.11923168 |
| 0.65629715  | 0.12086563 |
| 0.532995387 | 0.14446684 |
| 0.655219218 | 0.11011285 |
| 0.3930754   | 0.18802196 |
| 0.258998266 | 0.11630644 |
| 0.621517121 | 0.15646335 |
| 0.655028133 | 0.11478112 |
| 0.664332034 | 0.13242533 |
| 0.213018599 | 0.12623777 |
| 0.623875659 | 0.13982356 |
| 0.52570685  | 0.15202751 |
| 0.420702407 | 0.23945921 |
| 0.245940949 | 0.11537434 |
| 0.397513127 | 0.12697293 |
| 0.490185031 | 0.12848193 |
| 0.477126241 | 0.11410678 |
| 0.200890209 | 0.11246554 |
| 0.5951234   | 0.19970238 |
| 0.456166137 | 0.23680287 |
| 0.557256793 | 0.10221301 |
| 0.636785001 | 0.11002147 |
| 0.618288425 | 0.10405247 |
| 0.738010927 | 0.16818339 |
| 0.235733201 | 0.11104086 |
| 0.585840474 | 0.11922165 |
| 0.685304981 | 0.11503013 |
| 0.577875684 | 0.14851851 |
| 0.671137784 | 0.12898138 |
| 0.642866803 | 0.16924074 |
| 0.579452048 | 0.19707366 |
| 0.538625267 | 0.11144013 |
| 0.169848837 | 0.12443031 |
| 0.430432962 | 0.12629367 |
| 0.492939058 | 0.14976301 |
| 0.539528657 | 0.19463127 |
| 0.479170754 | 0.25383784 |
| 0.435937877 | 0.11594768 |

|             |            |
|-------------|------------|
| 0.695319436 | 0.14115236 |
| 0.530176193 | 0.14685888 |
| 0.683926756 | 0.14565475 |
| 0.325770084 | 0.16947679 |
| 0.441361403 | 0.13692398 |
| 0.378117719 | 0.13881133 |
| 0.578760397 | 0.10089231 |
| 0.387389265 | 0.14858076 |
| 0.388822615 | 0.13344337 |
| 0.529258628 | 0.10028594 |
| 0.305764298 | 0.11978601 |
| 0.639248117 | 0.2032474  |
| 0.543495784 | 0.12007613 |
| 0.638133503 | 0.15333405 |
| 0.404841102 | 0.17831807 |
| 0.387145419 | 0.11100375 |
| 0.532369653 | 0.11788315 |
| 0.153403267 | 0.1696578  |
| 0.639323655 | 0.17474532 |
| 0.479920811 | 0.14329095 |
| 0.659442508 | 0.13188668 |
| 0.388959231 | 0.24272091 |
| 0.390819345 | 0.25592695 |
| 0.47486056  | 0.26270725 |
| 0.535630262 | 0.15734403 |
| 0.688646769 | 0.13574583 |
| 0.737033465 | 0.1651487  |
| 0.214779143 | 0.10489943 |
| 0.25363698  | 0.19173194 |
| 0.304239126 | 0.2304219  |
| 0.403741023 | 0.14210124 |
| 0.184112876 | 0.11566181 |
| 0.348355916 | 0.10377289 |
| 0.460366584 | 0.13415543 |
| 0.567724866 | 0.12009113 |
| 0.546459263 | 0.14941322 |
| 0.487257208 | 0.15929495 |
| 0.807281428 | 0.10180224 |
| 0.757170526 | 0.10229929 |
| 0.617296811 | 0.11896811 |
| 0.175363791 | 0.14786203 |
| 0.514188945 | 0.14875204 |
| 0.272578666 | 0.12801157 |
| 0.509460098 | 0.13117311 |
| 0.496620518 | 0.10828357 |
| 0.182024699 | 0.11453862 |

|             |            |
|-------------|------------|
| 0.538193778 | 0.10172409 |
| 0.643339593 | 0.16619371 |
| 0.199535121 | 0.10737277 |
| 0.311449576 | 0.10655892 |
| 0.614343002 | 0.157847   |
| 0.46672992  | 0.14745114 |
| 0.179919886 | 0.10250971 |
| 0.680333545 | 0.10161974 |
| 0.545130192 | 0.24165942 |
| 0.376847891 | 0.13185133 |
| 0.435702349 | 0.13980174 |
| 0.420151986 | 0.16803952 |
| 0.507300457 | 0.20071462 |
| 0.308380992 | 0.2543042  |
| 0.21972871  | 0.12561316 |
| 0.139246038 | 0.13089748 |
| 0.674984815 | 0.13134563 |
| 0.299669262 | 0.17886533 |
| 0.707461422 | 0.10526548 |
| 0.435749865 | 0.16528645 |
| 0.373539427 | 0.18102422 |
| 0.398683352 | 0.2421549  |
| 0.193367098 | 0.10656806 |
| 0.436672652 | 0.16388586 |
| 0.191783516 | 0.16700153 |
| 0.2238998   | 0.17297733 |
| 0.153818041 | 0.10487122 |
| 0.50053275  | 0.14726537 |
| 0.284238116 | 0.22534053 |
| 0.309222806 | 0.15362998 |
| 0.461372261 | 0.17719337 |
| 0.630518642 | 0.13356597 |
| 0.481799134 | 0.100263   |
| 0.367102688 | 0.16382445 |
| 0.609694798 | 0.1074861  |
| 0.6733733   | 0.10987676 |
| 0.533872869 | 0.13395007 |
| 0.364665259 | 0.11682828 |
| 0.573569344 | 0.10109449 |
| 0.377113517 | 0.16454722 |
| 0.393358193 | 0.11495367 |
| 0.164326416 | 0.15156589 |
| 0.229491539 | 0.17972336 |
| 0.545729956 | 0.11256467 |
| 0.715517608 | 0.11675475 |
| 0.275999207 | 0.1475092  |



|             |            |
|-------------|------------|
| 0.450309612 | 0.12004978 |
| 0.366854139 | 0.19069289 |
| 0.371135128 | 0.22308639 |
| 0.618695905 | 0.10309715 |
| 0.620146103 | 0.1470801  |
| 0.415421462 | 0.21640102 |
| 0.36348485  | 0.19134918 |
| 0.589048033 | 0.1079457  |
| 0.746891654 | 0.14067775 |
| 0.481222097 | 0.16555787 |
| 0.574606182 | 0.13299352 |
| 0.474013049 | 0.14040646 |
| 0.307494094 | 0.14678881 |
| 0.525459566 | 0.11635364 |
| 0.515887855 | 0.13875497 |
| 0.282878193 | 0.15064931 |
| 0.225263608 | 0.16844454 |
| 0.311634579 | 0.17066047 |
| 0.226447451 | 0.11444301 |
| 0.521398778 | 0.17648309 |
| 0.436613186 | 0.20781041 |
| 0.353536029 | 0.14358512 |
| 0.530065565 | 0.16600351 |
| 0.409465478 | 0.17391871 |
| 0.491454525 | 0.10147324 |
| 0.318888172 | 0.13189721 |
| 0.360499794 | 0.10503868 |
| 0.037284327 | 0.13151743 |
| 0.562923062 | 0.14561435 |
| 0.370300642 | 0.24666329 |
| 0.356415776 | 0.17010772 |
| 0.583865849 | 0.15224117 |
| 0.303645516 | 0.16781456 |
| 0.645516482 | 0.123588   |
| 0.208399357 | 0.16485418 |
| 0.461866181 | 0.15761323 |
| 0.470575187 | 0.15914496 |
| 0.431715163 | 0.2099883  |
| 0.327761944 | 0.15931298 |
| 0.617362313 | 0.12255992 |
| 0.632115515 | 0.17180263 |
| 0.467375169 | 0.11916352 |
| 0.601859333 | 0.15040495 |
| 0.663717014 | 0.12293591 |
| 0.103047867 | 0.14260118 |
| 0.617733297 | 0.17093822 |

|             |            |
|-------------|------------|
| 0.674276051 | 0.12829421 |
| 0.181606853 | 0.13269155 |
| 0.372429727 | 0.15471874 |
| 0.376978345 | 0.12530601 |
| 0.637926502 | 0.15771544 |
| 0.281986543 | 0.13491018 |
| 0.679575603 | 0.10166092 |
| 0.653357951 | 0.11245331 |
| 0.290835356 | 0.16120487 |
| 0.358768669 | 0.17796495 |
| 0.66716085  | 0.10840301 |
| 0.671802185 | 0.11931757 |
| 0.5614776   | 0.14140097 |
| 0.451058596 | 0.1034167  |
| 0.456972418 | 0.12119866 |
| 0.622011379 | 0.13569685 |
| 0.354831805 | 0.26416508 |
| 0.416019211 | 0.12546388 |
| 0.183254333 | 0.11087131 |
| 0.297920863 | 0.12377013 |
| 0.252943715 | 0.14449519 |
| 0.671590754 | 0.11818753 |
| 0.443786803 | 0.1224047  |
| 0.401882592 | 0.19948706 |
| 0.752003292 | 0.11653323 |
| 0.111898953 | 0.11390107 |
| 0.50050636  | 0.10993457 |
| 0.622305408 | 0.13533837 |
| 0.560641562 | 0.19248212 |
| 0.322023598 | 0.10157709 |
| 0.2502799   | 0.12764899 |
| 0.140334293 | 0.11981253 |
| 0.088975409 | 0.10352114 |
| 0.297094673 | 0.13703694 |
| 0.417751067 | 0.12025164 |
| 0.572663981 | 0.10039331 |
| 0.57983206  | 0.14242478 |
| 0.716432452 | 0.1110526  |
| 0.706860209 | 0.1305968  |
| 0.627056621 | 0.16625252 |
| 0.735528212 | 0.1034443  |
| 0.568827627 | 0.12660456 |
| 0.166946125 | 0.10717203 |
| 0.659254631 | 0.14689602 |
| 0.762295023 | 0.10135679 |
| 0.587689867 | 0.19691578 |

|             |            |
|-------------|------------|
| 0.727415951 | 0.10366494 |
| 0.256479478 | 0.11655427 |
| 0.307940429 | 0.12455394 |
| 0.480827558 | 0.1002677  |
| 0.514415955 | 0.13011713 |
| 0.662259615 | 0.12255694 |
| 0.488806834 | 0.13576922 |
| 0.155871284 | 0.15672273 |
| 0.635377639 | 0.203007   |
| 0.184949928 | 0.13812109 |
| 0.527867571 | 0.14675628 |
| 0.147056036 | 0.16973739 |
| 0.686863294 | 0.11362642 |
| 0.66573525  | 0.10642844 |
| 0.65487122  | 0.12032136 |
| 0.70895649  | 0.10005095 |
| 0.61466547  | 0.10006514 |
| 0.407722126 | 0.10011042 |
| 0.620561893 | 0.10013666 |
| 0.726419092 | 0.10013948 |
| 0.62482391  | 0.1001432  |
| 0.349452495 | 0.10014625 |
| 0.721484024 | 0.10014689 |
| 0.661679799 | 0.10014778 |
| 0.601486437 | 0.10014809 |
| 0.275671965 | 0.10016317 |
| 0.400712584 | 0.10018743 |
| 0.173229483 | 0.10018752 |
| 0.266588348 | 0.10018917 |
| 0.70753981  | 0.10021078 |
| 0.754008151 | 0.100228   |
| 0.557920675 | 0.10024775 |
| 0.682596049 | 0.10027335 |
| 0.501235174 | 0.10039832 |
| 0.532770911 | 0.10041424 |
| 0.192134753 | 0.10045665 |
| 0.449585028 | 0.1004816  |
| 0.621438358 | 0.10050016 |
| 0.761261554 | 0.10052039 |
| 0.676954758 | 0.10052857 |
| 0.591324186 | 0.10053319 |
| 0.746858099 | 0.10054774 |
| 0.417219891 | 0.10055741 |
| 0.133353921 | 0.10058078 |
| 0.797960476 | 0.1005856  |
| 0.21824665  | 0.10059669 |

|             |            |
|-------------|------------|
| 0.793965345 | 0.1006057  |
| 0.134855502 | 0.10060971 |
| 0.358479904 | 0.10061617 |
| 0.227175624 | 0.10063041 |
| 0.169149311 | 0.10064886 |
| 0.12790996  | 0.10065107 |
| 0.597489699 | 0.10076073 |
| 0.608868136 | 0.10076978 |
| 0.296742063 | 0.10077094 |
| 0.273131082 | 0.10081797 |
| 0.389129332 | 0.10084248 |
| 0.316463497 | 0.10089061 |
| 0.285001391 | 0.10090115 |
| 0.700336711 | 0.10091541 |
| 0.154686369 | 0.10095512 |
| 0.770840362 | 0.10095944 |
| 0.261583569 | 0.10101749 |
| 0.221283032 | 0.1010234  |
| 0.160305611 | 0.10102789 |
| 0.71413926  | 0.10104819 |
| 0.493017103 | 0.10107339 |
| 0.165577197 | 0.10107589 |
| 0.176560833 | 0.10112157 |
| 0.576162672 | 0.10113195 |
| 0.29617241  | 0.10113296 |
| 0.770505061 | 0.10115163 |
| 0.582589964 | 0.10118298 |
| 0.717938155 | 0.10118663 |
| 0.553372735 | 0.1011943  |
| 0.310801134 | 0.1012044  |
| 0.545289517 | 0.10123706 |
| 0.508199443 | 0.10125708 |
| 0.530197    | 0.10127459 |
| 0.604326967 | 0.10133659 |
| 0.693922529 | 0.10137963 |
| 0.467899539 | 0.10138445 |
| 0.591888923 | 0.10143121 |
| 0.732341778 | 0.10145448 |
| 0.207766491 | 0.1014591  |
| 0.660421266 | 0.10148007 |
| 0.738328872 | 0.10155453 |
| 0.346269108 | 0.10156061 |
| 0.534673098 | 0.10163985 |
| 0.094855203 | 0.10164319 |
| 0.20291222  | 0.10165479 |
| 0.567360783 | 0.10172695 |

|             |            |
|-------------|------------|
| 0.266409227 | 0.10174052 |
| 0.148746341 | 0.10178431 |
| 0.584142437 | 0.10178647 |
| 0.595317559 | 0.10181905 |
| 0.420868112 | 0.10185505 |
| 0.232835964 | 0.10188213 |
| 0.271455295 | 0.10190949 |
| 0.172694392 | 0.10194141 |
| 0.7231321   | 0.10196265 |
| 0.628747368 | 0.10198555 |
| 0.287828421 | 0.1020263  |
| 0.258257408 | 0.10203919 |
| 0.551438995 | 0.10205394 |
| 0.555877455 | 0.1021136  |
| 0.626227638 | 0.10213432 |
| 0.493922785 | 0.10215779 |
| 0.484805875 | 0.10216081 |
| 0.150806314 | 0.10217087 |
| 0.461470949 | 0.10217295 |
| 0.627986092 | 0.10217449 |
| 0.186045648 | 0.10222937 |
| 0.752428726 | 0.10225336 |
| 0.744936827 | 0.10226244 |
| 0.621935391 | 0.10226707 |
| 0.24741307  | 0.10228277 |
| 0.133782249 | 0.10231822 |
| 0.274742608 | 0.10235497 |
| 0.15094163  | 0.1023584  |
| 0.208180443 | 0.10239427 |
| 0.106413936 | 0.10239907 |
| 0.187145305 | 0.10242114 |
| 0.175091378 | 0.10244107 |
| 0.163319674 | 0.10245667 |
| 0.157050505 | 0.1024819  |
| 0.659598727 | 0.10250535 |
| 0.683822371 | 0.10253732 |
| 0.142081676 | 0.10254285 |
| 0.768398385 | 0.10256055 |
| 0.232199308 | 0.10258021 |
| 0.748141875 | 0.10260296 |
| 0.384895992 | 0.10260623 |
| 0.639580219 | 0.10261939 |
| 0.260791729 | 0.10262788 |
| 0.333804526 | 0.1026286  |
| 0.123525185 | 0.10267332 |
| 0.302517678 | 0.1026999  |

|             |            |
|-------------|------------|
| 0.632199156 | 0.10271926 |
| 0.5241198   | 0.10273944 |
| 0.310781852 | 0.10276335 |
| 0.65422982  | 0.10277907 |
| 0.546962901 | 0.10280477 |
| 0.620532933 | 0.10281383 |
| 0.372046212 | 0.10283212 |
| 0.492617189 | 0.10283849 |
| 0.475642663 | 0.10288449 |
| 0.174217861 | 0.10289826 |
| 0.424247932 | 0.10290907 |
| 0.49749565  | 0.10291176 |
| 0.232317135 | 0.10295612 |
| 0.723606794 | 0.10297122 |
| 0.495204544 | 0.10297667 |
| 0.268476631 | 0.10297673 |
| 0.132155831 | 0.10298974 |
| 0.498168505 | 0.1030754  |
| 0.599442646 | 0.10311114 |
| 0.490860358 | 0.10313887 |
| 0.35216007  | 0.1031399  |
| 0.349567354 | 0.10320773 |
| 0.328328248 | 0.10326131 |
| 0.302817913 | 0.10326189 |
| 0.316418397 | 0.10326293 |
| 0.273199588 | 0.10328506 |
| 0.183591134 | 0.10331008 |
| 0.4467707   | 0.10336074 |
| 0.70494014  | 0.10336287 |
| 0.269020474 | 0.10340168 |
| 0.630974336 | 0.10340854 |
| 0.704846362 | 0.10344402 |
| 0.703960098 | 0.10348482 |
| 0.374528458 | 0.10348681 |
| 0.738434895 | 0.10348861 |
| 0.152143875 | 0.10355838 |
| 0.461964021 | 0.10356192 |
| 0.218245887 | 0.10358979 |
| 0.382490246 | 0.10361077 |
| 0.282994179 | 0.10361827 |
| 0.62078819  | 0.10363085 |
| 0.128640425 | 0.1037057  |
| 0.067154647 | 0.10371862 |
| 0.764171771 | 0.103729   |
| 0.724019169 | 0.10373001 |
| 0.681058973 | 0.10376176 |

|             |            |
|-------------|------------|
| 0.696076771 | 0.10377246 |
| 0.649421578 | 0.10379294 |
| 0.470240316 | 0.10381425 |
| 0.558609848 | 0.10382107 |
| 0.231244334 | 0.10383272 |
| 0.182323793 | 0.10384882 |
| 0.469784679 | 0.10386843 |
| 0.560079256 | 0.10387464 |
| 0.447752159 | 0.10388756 |
| 0.305800519 | 0.10389878 |
| 0.710406091 | 0.10390313 |
| 0.549875064 | 0.10393923 |
| 0.174755558 | 0.10396447 |
| 0.155505023 | 0.10397181 |
| 0.300899837 | 0.10398384 |
| 0.410193032 | 0.10404085 |
| 0.695709751 | 0.10407815 |
| 0.297331984 | 0.10417653 |
| 0.449400309 | 0.10423892 |
| 0.203075861 | 0.10426688 |
| 0.662906363 | 0.10429284 |
| 0.591756513 | 0.10431338 |
| 0.492287254 | 0.10432132 |
| 0.689846404 | 0.10435405 |
| 0.584946364 | 0.10435878 |
| 0.733042988 | 0.10436503 |
| 0.433075978 | 0.10438676 |
| 0.162501134 | 0.10447181 |
| 0.172454621 | 0.10448447 |
| 0.199684406 | 0.10448857 |
| 0.330478849 | 0.10451401 |
| 0.158386072 | 0.10456192 |
| 0.580160814 | 0.10457108 |
| 0.727004684 | 0.10457388 |
| 0.437030841 | 0.10469401 |
| 0.331646689 | 0.10472374 |
| 0.112284478 | 0.10473168 |
| 0.677892268 | 0.10473582 |
| 0.168430905 | 0.10475086 |
| 0.601585225 | 0.1047792  |
| 0.430824    | 0.10481107 |
| 0.307821465 | 0.10482206 |
| 0.159687771 | 0.10482294 |
| 0.662867965 | 0.10484623 |
| 0.639628733 | 0.10486305 |
| 0.25841108  | 0.10486306 |

|             |            |
|-------------|------------|
| 0.725518917 | 0.10487261 |
| 0.676757104 | 0.10490242 |
| 0.565782338 | 0.10490959 |
| 0.373217965 | 0.10491391 |
| 0.247582063 | 0.10494886 |
| 0.124904469 | 0.10495603 |
| 0.224393691 | 0.10497637 |
| 0.356787744 | 0.1050384  |
| 0.184373932 | 0.10506346 |
| 0.407991018 | 0.10508062 |
| 0.757366949 | 0.10514155 |
| 0.632606612 | 0.10515675 |
| 0.58615929  | 0.10515891 |
| 0.479671746 | 0.10517325 |
| 0.186159468 | 0.10521088 |
| 0.566360907 | 0.10523615 |
| 0.420585548 | 0.10524798 |
| 0.131456345 | 0.10527839 |
| 0.31387887  | 0.10532059 |
| 0.779889353 | 0.10532252 |
| 0.766386984 | 0.10535702 |
| 0.425233547 | 0.10541825 |
| 0.29621367  | 0.10542184 |
| 0.249350543 | 0.10543227 |
| 0.619617127 | 0.1054514  |
| 0.247901318 | 0.10545833 |
| 0.554128566 | 0.10545986 |
| 0.740837207 | 0.10547603 |
| 0.472462038 | 0.10548062 |
| 0.683364226 | 0.10549901 |
| 0.780777803 | 0.10559661 |
| 0.588839612 | 0.10559724 |
| 0.637773553 | 0.1055991  |
| 0.183217226 | 0.10563298 |
| 0.47204317  | 0.10564061 |
| 0.263016634 | 0.10567226 |
| 0.352656769 | 0.10569116 |
| 0.43129869  | 0.10574087 |
| 0.462550358 | 0.10577654 |
| 0.663005268 | 0.10579352 |
| 0.686284616 | 0.10579483 |
| 0.32588385  | 0.10580787 |
| 0.76072937  | 0.1058677  |
| 0.55500334  | 0.10587059 |
| 0.706894276 | 0.10591359 |
| 0.419416824 | 0.10592946 |



|             |            |
|-------------|------------|
| 0.624270855 | 0.10593677 |
| 0.668576731 | 0.10594466 |
| 0.322384726 | 0.10594624 |
| 0.468519658 | 0.10596781 |
| 0.395278443 | 0.10598746 |
| 0.188642786 | 0.10601498 |
| 0.343773284 | 0.10601996 |
| 0.638515384 | 0.10604399 |
| 0.368767554 | 0.1060524  |
| 0.57146846  | 0.10613693 |
| 0.221155868 | 0.10616866 |
| 0.180855999 | 0.10627365 |
| 0.78194427  | 0.10627666 |
| 0.538948757 | 0.10627868 |
| 0.550848631 | 0.10632583 |
| 0.569467407 | 0.10644634 |
| 0.209704992 | 0.10644705 |
| 0.658883826 | 0.10645692 |
| 0.612841039 | 0.10645926 |
| 0.309402821 | 0.10647302 |
| 0.73103169  | 0.10647607 |
| 0.644553297 | 0.10649094 |
| 0.229334748 | 0.10649623 |
| 0.461933256 | 0.10654216 |
| 0.419114267 | 0.10656918 |
| 0.430217937 | 0.10658282 |
| 0.703417633 | 0.1066202  |
| 0.337853786 | 0.10668694 |
| 0.640063632 | 0.10674993 |
| 0.674549028 | 0.10678166 |
| 0.180134314 | 0.1067936  |
| 0.191051838 | 0.1068004  |
| 0.414852297 | 0.10680236 |
| 0.3637891   | 0.10685551 |
| 0.629264516 | 0.10687933 |
| 0.796083044 | 0.10688595 |
| 0.393678748 | 0.10690644 |
| 0.664503836 | 0.10690998 |
| 0.538809597 | 0.10696341 |
| 0.535717766 | 0.10696962 |
| 0.208875888 | 0.10698466 |
| 0.636470534 | 0.10699082 |
| 0.767653256 | 0.10699295 |
| 0.743343993 | 0.10699907 |
| 0.528707836 | 0.10700698 |
| 0.359921146 | 0.10703383 |

|             |            |
|-------------|------------|
| 0.439022136 | 0.10704924 |
| 0.390474311 | 0.10705211 |
| 0.322923283 | 0.10705261 |
| 0.347258345 | 0.10705447 |
| 0.355957233 | 0.10707839 |
| 0.487324651 | 0.10711648 |
| 0.248081061 | 0.10727307 |
| 0.427821242 | 0.10727391 |
| 0.375840266 | 0.10731746 |
| 0.537191402 | 0.10734714 |
| 0.242468017 | 0.10739485 |
| 0.354586839 | 0.10740232 |
| 0.444108946 | 0.10741382 |
| 0.384954307 | 0.10742387 |
| 0.106662674 | 0.10742425 |
| 0.684625789 | 0.10743944 |
| 0.136334235 | 0.10744558 |
| 0.108618413 | 0.10749231 |
| 0.693060115 | 0.107513   |
| 0.765919982 | 0.1075518  |
| 0.729566487 | 0.10766005 |
| 0.713872802 | 0.10767747 |
| 0.650686921 | 0.10767789 |
| 0.290956778 | 0.10769067 |
| 0.626418154 | 0.10773023 |
| 0.272643678 | 0.10773581 |
| 0.461911724 | 0.1077398  |
| 0.149658964 | 0.10779019 |
| 0.356606395 | 0.10779371 |
| 0.189592217 | 0.10779541 |
| 0.339109186 | 0.10779687 |
| 0.279949791 | 0.10780576 |
| 0.532519279 | 0.10782787 |
| 0.708072391 | 0.10783739 |
| 0.558818553 | 0.10784872 |
| 0.700517162 | 0.10788931 |
| 0.459531065 | 0.10789388 |
| 0.535295776 | 0.10792195 |
| 0.438790526 | 0.10792882 |
| 0.159578387 | 0.10793341 |
| 0.238018749 | 0.10795651 |
| 0.559120435 | 0.10799036 |
| 0.441774314 | 0.10802189 |
| 0.354179192 | 0.10802453 |
| 0.231997142 | 0.1080823  |
| 0.636153306 | 0.10810036 |

|             |            |
|-------------|------------|
| 0.474469463 | 0.10810433 |
| 0.306274767 | 0.10811234 |
| 0.149855799 | 0.1081571  |
| 0.754648112 | 0.10816017 |
| 0.352925524 | 0.10825613 |
| 0.400388469 | 0.10826216 |
| 0.624713672 | 0.10836826 |
| 0.63931979  | 0.10837289 |
| 0.126066484 | 0.10838592 |
| 0.263028844 | 0.10843711 |
| 0.428585253 | 0.108527   |
| 0.383934659 | 0.10853819 |
| 0.270830192 | 0.10853955 |
| 0.461286641 | 0.10854508 |
| 0.263587646 | 0.10859965 |
| 0.754630804 | 0.1086867  |
| 0.15258937  | 0.10870712 |
| 0.201441188 | 0.10871329 |
| 0.691801937 | 0.10873147 |
| 0.503517712 | 0.10873583 |
| 0.612950918 | 0.10875823 |
| 0.15033871  | 0.10881418 |
| 0.575021992 | 0.10881992 |
| 0.461947026 | 0.10883047 |
| 0.556728607 | 0.10883156 |
| 0.341777634 | 0.10883177 |
| 0.530527763 | 0.1088327  |
| 0.396230154 | 0.108836   |
| 0.264700481 | 0.10889727 |
| 0.447780818 | 0.10889982 |
| 0.224528449 | 0.10891932 |
| 0.339283668 | 0.10894602 |
| 0.60670392  | 0.10895118 |
| 0.319056018 | 0.10895939 |
| 0.518128121 | 0.10895961 |
| 0.228095276 | 0.10897395 |
| 0.491948817 | 0.10899203 |
| 0.247163669 | 0.10901055 |
| 0.483283132 | 0.10902748 |
| 0.655444835 | 0.10908913 |
| 0.086504458 | 0.1091247  |
| 0.397486698 | 0.10913681 |
| 0.3518028   | 0.10914891 |
| 0.400885715 | 0.10915291 |
| 0.182885582 | 0.10916094 |
| 0.493451696 | 0.10920108 |

|             |            |
|-------------|------------|
| 0.236737713 | 0.10927722 |
| 0.637796634 | 0.10930965 |
| 0.538619322 | 0.10933946 |
| 0.355744588 | 0.10934789 |
| 0.28450984  | 0.10936238 |
| 0.648047563 | 0.10939487 |
| 0.180065498 | 0.10941829 |
| 0.420060747 | 0.10942283 |
| 0.728609906 | 0.10942637 |
| 0.360830566 | 0.10944743 |
| 0.524741558 | 0.10944943 |
| 0.322347196 | 0.10946199 |
| 0.672787039 | 0.10946419 |
| 0.581481684 | 0.10949489 |
| 0.688073552 | 0.10950815 |
| 0.636234755 | 0.10952447 |
| 0.334943716 | 0.10953342 |
| 0.42812501  | 0.10956214 |
| 0.095599637 | 0.10956957 |
| 0.612835419 | 0.10960542 |
| 0.761050921 | 0.10964731 |
| 0.774759934 | 0.10969629 |
| 0.702899764 | 0.10971143 |
| 0.61863766  | 0.10971514 |
| 0.235646976 | 0.10973167 |
| 0.318774939 | 0.1097432  |
| 0.694047183 | 0.10975411 |
| 0.396127828 | 0.10977328 |
| 0.427491169 | 0.10978426 |
| 0.352360352 | 0.10983511 |
| 0.364923128 | 0.10983911 |
| 0.666574161 | 0.10984949 |
| 0.704611776 | 0.10990418 |
| 0.721256213 | 0.10995049 |
| 0.712943342 | 0.11001065 |
| 0.244592067 | 0.11001158 |
| 0.434749443 | 0.11001329 |
| 0.685329894 | 0.11002107 |
| 0.614074577 | 0.11003626 |
| 0.270995658 | 0.11005888 |
| 0.199245055 | 0.11008634 |
| 0.798542122 | 0.11011471 |
| 0.595139406 | 0.11012513 |
| 0.689867956 | 0.11013876 |
| 0.538867256 | 0.11021717 |
| 0.558988479 | 0.11025292 |

|             |            |
|-------------|------------|
| 0.367258035 | 0.11025797 |
| 0.394631559 | 0.11029019 |
| 0.336639206 | 0.11031611 |
| 0.76483013  | 0.11033438 |
| 0.36066819  | 0.11033685 |
| 0.221980351 | 0.11036349 |
| 0.28626403  | 0.1103761  |
| 0.244274643 | 0.11041969 |
| 0.497882681 | 0.11046123 |
| 0.70556954  | 0.11047368 |
| 0.633776538 | 0.11049508 |
| 0.192994038 | 0.11052426 |
| 0.71187899  | 0.11056359 |
| 0.434781124 | 0.11056895 |
| 0.560964509 | 0.11059376 |
| 0.755668298 | 0.1105991  |
| 0.563457027 | 0.11060878 |
| 0.655826792 | 0.11063227 |
| 0.74867694  | 0.11066713 |
| 0.532978989 | 0.11067392 |
| 0.560540672 | 0.11071371 |
| 0.530765603 | 0.11072607 |
| 0.195601172 | 0.11076774 |
| 0.643395223 | 0.11076891 |
| 0.622261827 | 0.11078143 |
| 0.172154113 | 0.11079197 |
| 0.257840772 | 0.11079932 |
| 0.603732666 | 0.11081659 |
| 0.118878818 | 0.11082346 |
| 0.215775903 | 0.11084459 |
| 0.701448556 | 0.1108566  |
| 0.413352487 | 0.11087612 |
| 0.177452409 | 0.11090529 |
| 0.574979909 | 0.1109112  |
| 0.174787819 | 0.11092336 |
| 0.241587829 | 0.11093433 |
| 0.297095656 | 0.11095069 |
| 0.668247976 | 0.11095461 |
| 0.768123476 | 0.11099309 |
| 0.427339118 | 0.11105299 |
| 0.773983814 | 0.11109272 |
| 0.255319494 | 0.11116281 |
| 0.668730387 | 0.11117794 |
| 0.606723646 | 0.11119328 |
| 0.165035478 | 0.11121045 |
| 0.234130914 | 0.11121832 |

|             |            |
|-------------|------------|
| 0.372355024 | 0.11128148 |
| 0.108967361 | 0.11128644 |
| 0.363801369 | 0.11128987 |
| 0.587429266 | 0.11133709 |
| 0.732736445 | 0.11134684 |
| 0.199510631 | 0.11152047 |
| 0.485825903 | 0.11152128 |
| 0.234075662 | 0.11152946 |
| 0.71414479  | 0.11155947 |
| 0.763491754 | 0.11156804 |
| 0.581175675 | 0.1116078  |
| 0.545621022 | 0.11162182 |
| 0.134939766 | 0.11162605 |
| 0.527141353 | 0.11164783 |
| 0.149868037 | 0.11165448 |
| 0.698993376 | 0.11166085 |
| 0.357647735 | 0.1116666  |
| 0.524025343 | 0.11167046 |
| 0.665707276 | 0.11167955 |
| 0.214676682 | 0.11180054 |
| 0.309518469 | 0.11181041 |
| 0.312849986 | 0.11183296 |
| 0.659381734 | 0.11187087 |
| 0.597574679 | 0.11189303 |
| 0.162173145 | 0.11192629 |
| 0.210949002 | 0.11198091 |
| 0.192998456 | 0.11199433 |
| 0.719938925 | 0.11206195 |
| 0.484072956 | 0.11206546 |
| 0.629437254 | 0.1121104  |
| 0.369261099 | 0.1121108  |
| 0.324664696 | 0.11212112 |
| 0.177020727 | 0.11222089 |
| 0.358381209 | 0.11223345 |
| 0.743037814 | 0.11224861 |
| 0.670945364 | 0.11230904 |
| 0.371645792 | 0.11230915 |
| 0.488822437 | 0.11232178 |
| 0.560094113 | 0.11232954 |
| 0.292893918 | 0.1123362  |
| 0.129230091 | 0.11233674 |
| 0.493518408 | 0.11234115 |
| 0.542697416 | 0.11234894 |
| 0.76257399  | 0.11235538 |
| 0.6910683   | 0.11240353 |
| 0.659401546 | 0.11241213 |

|             |            |
|-------------|------------|
| 0.60464015  | 0.11242656 |
| 0.220806698 | 0.11245506 |
| 0.570562199 | 0.11248855 |
| 0.185992862 | 0.11249966 |
| 0.447351573 | 0.11254795 |
| 0.509918348 | 0.11254797 |
| 0.250610687 | 0.11255216 |
| 0.393588279 | 0.11256995 |
| 0.488449189 | 0.11260552 |
| 0.728747466 | 0.11261856 |
| 0.715289319 | 0.11263299 |
| 0.633850225 | 0.11266562 |
| 0.769938419 | 0.11269058 |
| 0.517971408 | 0.11269667 |
| 0.489368798 | 0.11273981 |
| 0.325083857 | 0.11274729 |
| 0.697251958 | 0.11282618 |
| 0.677987332 | 0.11282931 |
| 0.231669096 | 0.11283144 |
| 0.068562365 | 0.11293937 |
| 0.464092261 | 0.11294141 |
| 0.824453724 | 0.11295314 |
| 0.437967775 | 0.1129765  |
| 0.373096418 | 0.11306684 |
| 0.456869209 | 0.11307706 |
| 0.652133744 | 0.113128   |
| 0.543973158 | 0.11313081 |
| 0.582963584 | 0.11316453 |
| 0.260715101 | 0.11321352 |
| 0.57164695  | 0.11322809 |
| 0.659842794 | 0.11328687 |
| 0.102701854 | 0.11330536 |
| 0.549238757 | 0.11336508 |
| 0.525457274 | 0.11338221 |
| 0.197908934 | 0.11341969 |
| 0.442232674 | 0.11342778 |
| 0.33918192  | 0.11343201 |
| 0.706158105 | 0.11343875 |
| 0.496570593 | 0.11345959 |
| 0.401029423 | 0.11353317 |
| 0.222608509 | 0.11354042 |
| 0.629776232 | 0.1135529  |
| 0.212293572 | 0.11355316 |
| 0.552014579 | 0.11359059 |
| 0.135362448 | 0.1136173  |
| 0.158144031 | 0.11361889 |

|             |            |
|-------------|------------|
| 0.637556054 | 0.11367263 |
| 0.568069623 | 0.1137119  |
| 0.648312606 | 0.113729   |
| 0.253310613 | 0.11375481 |
| 0.320514595 | 0.11377331 |
| 0.213668815 | 0.11378901 |
| 0.668768824 | 0.11379176 |
| 0.714486873 | 0.11380587 |
| 0.718278794 | 0.11381779 |
| 0.572458456 | 0.11382356 |
| 0.64901806  | 0.1138247  |
| 0.730670414 | 0.11384599 |
| 0.63006778  | 0.11385197 |
| 0.717169814 | 0.1138919  |
| 0.293024518 | 0.1138939  |
| 0.655508206 | 0.11390922 |
| 0.355295169 | 0.11391222 |
| 0.166941583 | 0.11393999 |
| 0.41683602  | 0.11396888 |
| 0.750950816 | 0.11400379 |
| 0.273105825 | 0.11401485 |
| 0.659268229 | 0.11402768 |
| 0.574346367 | 0.11403109 |
| 0.730564444 | 0.11404171 |
| 0.740670497 | 0.1141245  |
| 0.359512616 | 0.11416139 |
| 0.284610167 | 0.11420735 |
| 0.294880956 | 0.11421981 |
| 0.261642017 | 0.11428694 |
| 0.696922071 | 0.11435637 |
| 0.694924285 | 0.11436166 |
| 0.318795791 | 0.11439778 |
| 0.628123536 | 0.11441173 |
| 0.718551224 | 0.11441525 |
| 0.370228606 | 0.11441989 |
| 0.390660631 | 0.11442849 |
| 0.269327297 | 0.11449364 |
| 0.541320885 | 0.11449367 |
| 0.21120024  | 0.11454768 |
| 0.421088885 | 0.11460227 |
| 0.336989747 | 0.11460827 |
| 0.290596454 | 0.11466272 |
| 0.40735847  | 0.11471131 |
| 0.649829711 | 0.11474965 |
| 0.357304053 | 0.1147916  |
| 0.601547475 | 0.11479467 |



|             |            |
|-------------|------------|
| 0.465583536 | 0.11479787 |
| 0.612483358 | 0.11485341 |
| 0.732636395 | 0.11487381 |
| 0.701119669 | 0.11487797 |
| 0.24358953  | 0.11489421 |
| 0.235266795 | 0.11489621 |
| 0.527324997 | 0.11490196 |
| 0.702755691 | 0.11490308 |
| 0.641190517 | 0.11493645 |
| 0.749934143 | 0.11495578 |
| 0.745105417 | 0.11507895 |
| 0.296540789 | 0.1151367  |
| 0.45120922  | 0.11513962 |
| 0.285876829 | 0.11520176 |
| 0.218260766 | 0.11521158 |
| 0.264086035 | 0.11528134 |
| 0.639802416 | 0.11528475 |
| 0.351001539 | 0.11531106 |
| 0.756347778 | 0.11542053 |
| 0.71246207  | 0.1154259  |
| 0.609287218 | 0.1155033  |
| 0.198227549 | 0.11551807 |
| 0.26570784  | 0.11553256 |
| 0.517645697 | 0.115553   |
| 0.493330686 | 0.11556844 |
| 0.346071496 | 0.11557237 |
| 0.773329624 | 0.11558046 |
| 0.815261246 | 0.11558345 |
| 0.587584787 | 0.11560773 |
| 0.36073781  | 0.11565451 |
| 0.185413132 | 0.11576573 |
| 0.276294299 | 0.11576575 |
| 0.659876184 | 0.1157754  |
| 0.438399527 | 0.11585944 |
| 0.168962328 | 0.11585993 |
| 0.266748482 | 0.1159876  |
| 0.483645878 | 0.11599955 |
| 0.635357061 | 0.11600985 |
| 0.268218212 | 0.11604745 |
| 0.282593506 | 0.11606562 |
| 0.402198095 | 0.11607613 |
| 0.597600863 | 0.1160902  |
| 0.17502888  | 0.11610141 |
| 0.497242445 | 0.11613187 |
| 0.590015566 | 0.1162414  |
| 0.759736311 | 0.11627891 |

|             |            |
|-------------|------------|
| 0.638769104 | 0.11632286 |
| 0.51683348  | 0.11634983 |
| 0.747332435 | 0.11638048 |
| 0.654019823 | 0.11642019 |
| 0.349848746 | 0.11646667 |
| 0.478196866 | 0.11653196 |
| 0.411230564 | 0.11653735 |
| 0.447709354 | 0.11654609 |
| 0.524701023 | 0.11655771 |
| 0.357401735 | 0.11656258 |
| 0.149782248 | 0.11656346 |
| 0.696714419 | 0.11661078 |
| 0.529096221 | 0.11661892 |
| 0.357704875 | 0.11663346 |
| 0.327783211 | 0.11665112 |
| 0.36127269  | 0.11672003 |
| 0.176469704 | 0.11675306 |
| 0.759055812 | 0.11679362 |
| 0.34594703  | 0.11680276 |
| 0.232521683 | 0.11680295 |
| 0.177261741 | 0.11683084 |
| 0.658863985 | 0.11683666 |
| 0.436035506 | 0.11689662 |
| 0.730276762 | 0.11691888 |
| 0.518172005 | 0.1169412  |
| 0.635348762 | 0.1169574  |
| 0.61684757  | 0.11696026 |
| 0.509356684 | 0.11696365 |
| 0.570050591 | 0.11697633 |
| 0.534241883 | 0.11700776 |
| 0.52005118  | 0.11700904 |
| 0.64571494  | 0.1170309  |
| 0.1939      | 0.11705123 |
| 0.405725672 | 0.11710579 |
| 0.725780686 | 0.11710597 |
| 0.653598821 | 0.11710969 |
| 0.5390257   | 0.11712924 |
| 0.180600417 | 0.11713199 |
| 0.222585126 | 0.11715431 |
| 0.464810688 | 0.11716331 |
| 0.431088083 | 0.11717045 |
| 0.619050094 | 0.11717939 |
| 0.230775026 | 0.11719326 |
| 0.375531253 | 0.11719471 |
| 0.348693738 | 0.11720185 |
| 0.299509807 | 0.11721273 |

|             |            |
|-------------|------------|
| 0.509467754 | 0.11721512 |
| 0.23258273  | 0.11721988 |
| 0.758467816 | 0.11728315 |
| 0.570619156 | 0.11733762 |
| 0.413324412 | 0.11734953 |
| 0.723628691 | 0.11735626 |
| 0.719799264 | 0.11741012 |
| 0.336686378 | 0.11752377 |
| 0.750515637 | 0.11757603 |
| 0.328074841 | 0.11758064 |
| 0.60617347  | 0.11758197 |
| 0.471823716 | 0.11763236 |
| 0.159034507 | 0.11764334 |
| 0.663001733 | 0.11769041 |
| 0.519892121 | 0.1177694  |
| 0.26283874  | 0.11778855 |
| 0.688662871 | 0.11780423 |
| 0.213151138 | 0.11782977 |
| 0.621071745 | 0.11784322 |
| 0.588729216 | 0.11784323 |
| 0.625313465 | 0.11785821 |
| 0.637738755 | 0.11788256 |
| 0.582736439 | 0.11789885 |
| 0.113240826 | 0.11793944 |
| 0.437643731 | 0.11796886 |
| 0.375319473 | 0.11801833 |
| 0.60700502  | 0.11805171 |
| 0.187934833 | 0.11809118 |
| 0.667249254 | 0.11813304 |
| 0.663628859 | 0.11817066 |
| 0.134960882 | 0.11821298 |
| 0.609015326 | 0.11823676 |
| 0.373826537 | 0.11827528 |
| 0.383138617 | 0.11828163 |
| 0.617480858 | 0.11828862 |
| 0.503009714 | 0.11829764 |
| 0.207019208 | 0.11840898 |
| 0.211928981 | 0.11842559 |
| 0.718313705 | 0.11846955 |
| 0.110748312 | 0.11847498 |
| 0.695623182 | 0.11856269 |
| 0.656773391 | 0.11856674 |
| 0.259794381 | 0.11860108 |
| 0.787042355 | 0.11867326 |
| 0.62627211  | 0.11871557 |
| 0.707836415 | 0.11877331 |

|             |            |
|-------------|------------|
| 0.313650056 | 0.11884896 |
| 0.420652283 | 0.11887305 |
| 0.3760318   | 0.11887641 |
| 0.244211676 | 0.11889421 |
| 0.570465823 | 0.11890223 |
| 0.656381657 | 0.1189261  |
| 0.66309197  | 0.11895428 |
| 0.73996217  | 0.1189551  |
| 0.500683392 | 0.1189862  |
| 0.618408888 | 0.11900128 |
| 0.639236797 | 0.11901357 |
| 0.574805489 | 0.11903815 |
| 0.406405734 | 0.11907086 |
| 0.56901067  | 0.11909029 |
| 0.118298476 | 0.11911412 |
| 0.670566859 | 0.11912428 |
| 0.27894921  | 0.11916904 |
| 0.338635385 | 0.11917084 |
| 0.271203246 | 0.11917621 |
| 0.623136008 | 0.11921157 |
| 0.710604638 | 0.11921938 |
| 0.133950879 | 0.119298   |
| 0.33594337  | 0.11930128 |
| 0.72221455  | 0.11933266 |
| 0.433642278 | 0.11934315 |
| 0.486660233 | 0.11939927 |
| 0.501822169 | 0.11940604 |
| 0.650134608 | 0.11949135 |
| 0.601428801 | 0.11951844 |
| 0.545621674 | 0.11952156 |
| 0.361914556 | 0.11954181 |
| 0.136490454 | 0.11965931 |
| 0.560480096 | 0.1196721  |
| 0.389618089 | 0.11967352 |
| 0.432431002 | 0.11967386 |
| 0.324071106 | 0.11968079 |
| 0.327958432 | 0.11969543 |
| 0.603059653 | 0.11976104 |
| 0.685758111 | 0.11978385 |
| 0.091391857 | 0.1198073  |
| 0.603040444 | 0.11981241 |
| 0.230968631 | 0.11985484 |
| 0.242652241 | 0.11986731 |
| 0.576691138 | 0.11987056 |
| 0.588034262 | 0.11994877 |
| 0.30396218  | 0.11996952 |

|             |            |
|-------------|------------|
| 0.692890678 | 0.12000247 |
| 0.690207972 | 0.12005637 |
| 0.157558979 | 0.12007651 |
| 0.565865628 | 0.12009828 |
| 0.518011846 | 0.12010763 |
| 0.598715023 | 0.12014303 |
| 0.695823234 | 0.12016104 |
| 0.659008681 | 0.12018667 |
| 0.658562095 | 0.12023365 |
| 0.234436777 | 0.12031792 |
| 0.695851472 | 0.12031852 |
| 0.499875461 | 0.12033198 |
| 0.733836491 | 0.12039285 |
| 0.431443671 | 0.1204004  |
| 0.313396424 | 0.12040107 |
| 0.61388384  | 0.12042594 |
| 0.46339358  | 0.12045083 |
| 0.515774706 | 0.12050873 |
| 0.256304704 | 0.12052124 |
| 0.385429784 | 0.12052786 |
| 0.200424159 | 0.1206047  |
| 0.330519681 | 0.12071592 |
| 0.531577412 | 0.12071969 |
| 0.555045903 | 0.12078159 |
| 0.709347601 | 0.12081557 |
| 0.490258436 | 0.12090241 |
| 0.735370401 | 0.12094254 |
| 0.528927044 | 0.12097677 |
| 0.251288356 | 0.12098319 |
| 0.742761193 | 0.12098397 |
| 0.495587855 | 0.12098863 |
| 0.278052587 | 0.12102975 |
| 0.768862442 | 0.12104272 |
| 0.386775697 | 0.12104489 |
| 0.644098655 | 0.1210848  |
| 0.625133118 | 0.12110836 |
| 0.429750407 | 0.12115582 |
| 0.694864471 | 0.12120144 |
| 0.63725548  | 0.12120376 |
| 0.715006329 | 0.12120591 |
| 0.315270058 | 0.12126513 |
| 0.640461041 | 0.12128535 |
| 0.586547787 | 0.1213411  |
| 0.403560255 | 0.12135407 |
| 0.706209456 | 0.12145333 |
| 0.680191339 | 0.12149377 |

|             |            |
|-------------|------------|
| 0.529049748 | 0.12150378 |
| 0.258878092 | 0.12154217 |
| 0.496427729 | 0.1215448  |
| 0.156856812 | 0.12155793 |
| 0.156744388 | 0.12158438 |
| 0.35871714  | 0.12159695 |
| 0.400380067 | 0.12159836 |
| 0.705311578 | 0.12162967 |
| 0.682213292 | 0.12172784 |
| 0.529642855 | 0.1217483  |
| 0.36156915  | 0.12177866 |
| 0.212241424 | 0.12180998 |
| 0.509490497 | 0.12183923 |
| 0.458238134 | 0.12186642 |
| 0.64443012  | 0.1219367  |
| 0.68687435  | 0.12195836 |
| 0.638809065 | 0.12200009 |
| 0.683584058 | 0.12205325 |
| 0.459419459 | 0.12205493 |
| 0.653343597 | 0.12207375 |
| 0.707213978 | 0.12211228 |
| 0.403452757 | 0.1221347  |
| 0.673661786 | 0.12213698 |
| 0.674769176 | 0.12213923 |
| 0.211800761 | 0.12214357 |
| 0.376071074 | 0.12214652 |
| 0.131331173 | 0.12217697 |
| 0.659903712 | 0.12223619 |
| 0.702105522 | 0.12228858 |
| 0.658870606 | 0.12229471 |
| 0.609733806 | 0.12235792 |
| 0.395623832 | 0.12242365 |
| 0.643551352 | 0.12245138 |
| 0.277401455 | 0.12246707 |
| 0.217443612 | 0.12251973 |
| 0.557198379 | 0.12253543 |
| 0.272834327 | 0.12253992 |
| 0.34072384  | 0.12254221 |
| 0.173331817 | 0.12258301 |
| 0.470091165 | 0.12264361 |
| 0.362427002 | 0.12264408 |
| 0.167752707 | 0.12267827 |
| 0.09702629  | 0.12269305 |
| 0.373690395 | 0.12270189 |
| 0.34065409  | 0.12271515 |
| 0.298127948 | 0.12272001 |

|             |            |
|-------------|------------|
| 0.158794791 | 0.12272119 |
| 0.408248128 | 0.12274261 |
| 0.546437981 | 0.12278485 |
| 0.159775813 | 0.12279894 |
| 0.187049346 | 0.12280705 |
| 0.30308589  | 0.12283209 |
| 0.610909542 | 0.12284802 |
| 0.270982464 | 0.12305203 |
| 0.626987345 | 0.12306773 |
| 0.617100742 | 0.12311575 |
| 0.211919739 | 0.12312625 |
| 0.46360629  | 0.12316304 |
| 0.679810227 | 0.12317936 |
| 0.152674772 | 0.1231831  |
| 0.633004374 | 0.12319046 |
| 0.253502391 | 0.12319501 |
| 0.321547065 | 0.12322089 |
| 0.680651456 | 0.1232669  |
| 0.515957616 | 0.12326988 |
| 0.534037824 | 0.12330492 |
| 0.303810416 | 0.12330721 |
| 0.717400631 | 0.12332211 |
| 0.421930209 | 0.12332604 |
| 0.603919608 | 0.12337872 |
| 0.778503943 | 0.12347803 |
| 0.441080556 | 0.12353535 |
| 0.456592797 | 0.12357413 |
| 0.481264519 | 0.12357794 |
| 0.200993383 | 0.12363726 |
| 0.339507525 | 0.1236849  |
| 0.682021151 | 0.12368583 |
| 0.782894029 | 0.12370266 |
| 0.300098506 | 0.1237122  |
| 0.500681482 | 0.12372111 |
| 0.535961655 | 0.12373845 |
| 0.531657223 | 0.12379357 |
| 0.597299675 | 0.12380801 |
| 0.556237255 | 0.12383896 |
| 0.18473141  | 0.12388082 |
| 0.325139694 | 0.12389677 |
| 0.163266587 | 0.12389745 |
| 0.512302618 | 0.12392311 |
| 0.666387501 | 0.1239815  |
| 0.427778107 | 0.12398518 |
| 0.532297202 | 0.123996   |
| 0.152211458 | 0.1240054  |

|             |            |
|-------------|------------|
| 0.381653195 | 0.12403113 |
| 0.223110061 | 0.12409229 |
| 0.660284418 | 0.12420298 |
| 0.793959503 | 0.1243185  |
| 0.188867869 | 0.12432081 |
| 0.268697048 | 0.12438865 |
| 0.143453279 | 0.12442196 |
| 0.206862875 | 0.12442504 |
| 0.587291805 | 0.12443423 |
| 0.708628722 | 0.12448541 |
| 0.573623469 | 0.12450221 |
| 0.709005481 | 0.12450399 |
| 0.459298659 | 0.12451525 |
| 0.666366627 | 0.12452813 |
| 0.516731123 | 0.12455358 |
| 0.451263628 | 0.12464256 |
| 0.566307771 | 0.12467831 |
| 0.486610758 | 0.12472983 |
| 0.123081175 | 0.12476465 |
| 0.478594749 | 0.12477865 |
| 0.114176415 | 0.1248185  |
| 0.702449824 | 0.12489795 |
| 0.622408014 | 0.12490788 |
| 0.496621899 | 0.12490805 |
| 0.592313434 | 0.12491497 |
| 0.222689493 | 0.12493018 |
| 0.593661409 | 0.12501155 |
| 0.506893227 | 0.12502908 |
| 0.354917477 | 0.12504871 |
| 0.559231121 | 0.12507006 |
| 0.627343218 | 0.12511164 |
| 0.574598053 | 0.12511639 |
| 0.388669012 | 0.12511702 |
| 0.576818276 | 0.1251227  |
| 0.307705017 | 0.12513348 |
| 0.689347075 | 0.12513351 |
| 0.315183481 | 0.12514341 |
| 0.115503817 | 0.12515376 |
| 0.420439167 | 0.12519608 |
| 0.258216483 | 0.12523444 |
| 0.174486965 | 0.12527064 |
| 0.754728485 | 0.12528954 |
| 0.270107818 | 0.1253108  |
| 0.149300529 | 0.12535119 |
| 0.684461121 | 0.1253689  |
| 0.515003164 | 0.12538651 |



|             |            |
|-------------|------------|
| 0.334165283 | 0.12540235 |
| 0.625065507 | 0.12547454 |
| 0.551730158 | 0.12549637 |
| 0.415230368 | 0.12549938 |
| 0.362342377 | 0.12551586 |
| 0.156364014 | 0.12552061 |
| 0.77134532  | 0.12553443 |
| 0.487393543 | 0.12555049 |
| 0.168282028 | 0.12559808 |
| 0.724269344 | 0.12564753 |
| 0.202971978 | 0.12567755 |
| 0.417368086 | 0.12569642 |
| 0.665319957 | 0.12581679 |
| 0.592220362 | 0.12583405 |
| 0.603033413 | 0.12592467 |
| 0.636537083 | 0.12595689 |
| 0.441087295 | 0.12599114 |
| 0.522527841 | 0.12600362 |
| 0.361555284 | 0.12601793 |
| 0.456091307 | 0.12603759 |
| 0.763084356 | 0.12604868 |
| 0.207949302 | 0.12606464 |
| 0.668560686 | 0.12611576 |
| 0.363313156 | 0.12613892 |
| 0.310541207 | 0.12614283 |
| 0.57911433  | 0.12614511 |
| 0.692266378 | 0.12617073 |
| 0.570787813 | 0.12618237 |
| 0.721698805 | 0.12622755 |
| 0.337755944 | 0.12625636 |
| 0.229834475 | 0.12626098 |
| 0.690445441 | 0.12626191 |
| 0.537382297 | 0.12628677 |
| 0.314682252 | 0.12628786 |
| 0.345009878 | 0.12639101 |
| 0.303532892 | 0.12647861 |
| 0.198944363 | 0.12655411 |
| 0.444147396 | 0.1265572  |
| 0.363036963 | 0.1265827  |
| 0.671452319 | 0.12663276 |
| 0.460026583 | 0.12667078 |
| 0.284899133 | 0.12668492 |
| 0.69437638  | 0.12670895 |
| 0.522662431 | 0.12681676 |
| 0.526326636 | 0.12689704 |
| 0.556449753 | 0.12691043 |

|             |            |
|-------------|------------|
| 0.570291072 | 0.12692338 |
| 0.154478209 | 0.126934   |
| 0.127287838 | 0.12700325 |
| 0.316622735 | 0.12706924 |
| 0.575236082 | 0.12707684 |
| 0.340125219 | 0.1270801  |
| 0.493937495 | 0.12709065 |
| 0.103627404 | 0.12714864 |
| 0.547317992 | 0.12723685 |
| 0.465994664 | 0.12723914 |
| 0.150257585 | 0.12724086 |
| 0.744420686 | 0.12724426 |
| 0.543788368 | 0.12731312 |
| 0.181315155 | 0.12737617 |
| 0.538047272 | 0.12741898 |
| 0.695285169 | 0.12742364 |
| 0.309104978 | 0.12742414 |
| 0.331539025 | 0.12743211 |
| 0.426072338 | 0.12744475 |
| 0.359074916 | 0.12751358 |
| 0.217449991 | 0.12752273 |
| 0.366933208 | 0.12752645 |
| 0.399332986 | 0.12756405 |
| 0.535166866 | 0.12760171 |
| 0.153481233 | 0.12764532 |
| 0.725178671 | 0.12766629 |
| 0.50069049  | 0.12774975 |
| 0.23826836  | 0.12781113 |
| 0.154659733 | 0.12794133 |
| 0.25103178  | 0.12798515 |
| 0.33564724  | 0.12801113 |
| 0.470784175 | 0.12806837 |
| 0.249207064 | 0.12809767 |
| 0.586657558 | 0.12812301 |
| 0.321147028 | 0.12813531 |
| 0.316855802 | 0.12819769 |
| 0.465989948 | 0.12826632 |
| 0.135650045 | 0.1282726  |
| 0.643942575 | 0.12840607 |
| 0.426662057 | 0.12844761 |
| 0.486982507 | 0.12846717 |
| 0.624851299 | 0.12849877 |
| 0.543370693 | 0.12851376 |
| 0.449289531 | 0.1285598  |
| 0.267589449 | 0.12861073 |
| 0.678349903 | 0.12862592 |

|             |            |
|-------------|------------|
| 0.514489697 | 0.12863168 |
| 0.413775372 | 0.12866111 |
| 0.730983921 | 0.12868248 |
| 0.685551002 | 0.1287246  |
| 0.102882035 | 0.12873543 |
| 0.649980904 | 0.12876746 |
| 0.295526049 | 0.12880697 |
| 0.30976874  | 0.12881216 |
| 0.193233342 | 0.12881712 |
| 0.446737268 | 0.12881924 |
| 0.20706123  | 0.12882257 |
| 0.396015588 | 0.12884607 |
| 0.252167174 | 0.12913788 |
| 0.352443907 | 0.12918396 |
| 0.666554003 | 0.12921457 |
| 0.48940826  | 0.12929437 |
| 0.649116621 | 0.12935009 |
| 0.52678     | 0.12936522 |
| 0.494519257 | 0.12940156 |
| 0.410184815 | 0.12940608 |
| 0.32915365  | 0.12942232 |
| 0.505175319 | 0.12944024 |
| 0.575336795 | 0.1294433  |
| 0.351353788 | 0.12946285 |
| 0.494760032 | 0.12948735 |
| 0.338270943 | 0.12950185 |
| 0.719621435 | 0.12951664 |
| 0.206362796 | 0.12952069 |
| 0.522061278 | 0.12957508 |
| 0.234095625 | 0.12962024 |
| 0.215138197 | 0.12965134 |
| 0.723215937 | 0.12971034 |
| 0.411934376 | 0.12971078 |
| 0.266283015 | 0.12974489 |
| 0.749619084 | 0.12981824 |
| 0.236870269 | 0.12984127 |
| 0.717677702 | 0.12989855 |
| 0.456910048 | 0.12993704 |
| 0.402644329 | 0.12997647 |
| 0.276934062 | 0.13000417 |
| 0.616295306 | 0.13002061 |
| 0.564951689 | 0.1300894  |
| 0.629609412 | 0.13011571 |
| 0.766680037 | 0.13011679 |
| 0.723394971 | 0.13011717 |
| 0.164815438 | 0.13014655 |

|             |            |
|-------------|------------|
| 0.333308044 | 0.13015383 |
| 0.270002479 | 0.13017723 |
| 0.564879467 | 0.13019523 |
| 0.20799492  | 0.13019734 |
| 0.568681559 | 0.13022135 |
| 0.485659873 | 0.13022949 |
| 0.481120043 | 0.13024235 |
| 0.642068679 | 0.13030532 |
| 0.558336513 | 0.13033529 |
| 0.517138375 | 0.13038107 |
| 0.58671598  | 0.13041316 |
| 0.538186236 | 0.13042085 |
| 0.651560566 | 0.13052663 |
| 0.554708318 | 0.13053271 |
| 0.630173883 | 0.13060621 |
| 0.234086606 | 0.1306571  |
| 0.244361147 | 0.13067847 |
| 0.696825298 | 0.13071608 |
| 0.61436744  | 0.13072262 |
| 0.334321165 | 0.13074614 |
| 0.215048265 | 0.13082475 |
| 0.474115147 | 0.13087153 |
| 0.304911764 | 0.13088563 |
| 0.216168097 | 0.13090904 |
| 0.325256686 | 0.13111477 |
| 0.685689338 | 0.13111924 |
| 0.541298882 | 0.13120306 |
| 0.544020842 | 0.13123222 |
| 0.111926767 | 0.13128643 |
| 0.732262526 | 0.13133356 |
| 0.303731149 | 0.1313429  |
| 0.582963907 | 0.13136467 |
| 0.679887305 | 0.13136614 |
| 0.644626585 | 0.13143427 |
| 0.462172652 | 0.13145931 |
| 0.615251404 | 0.13147469 |
| 0.22146031  | 0.13154583 |
| 0.144487846 | 0.13154683 |
| 0.512927542 | 0.13161145 |
| 0.18015609  | 0.13161444 |
| 0.497582468 | 0.13164695 |
| 0.187755104 | 0.13165832 |
| 0.214163874 | 0.13166965 |
| 0.404069415 | 0.13172591 |
| 0.510397856 | 0.13172605 |
| 0.595706205 | 0.13182468 |

|             |            |
|-------------|------------|
| 0.267568082 | 0.13182626 |
| 0.5039382   | 0.13183875 |
| 0.605948095 | 0.13183977 |
| 0.425149215 | 0.13184128 |
| 0.280654627 | 0.13184985 |
| 0.563987252 | 0.13195644 |
| 0.601671636 | 0.13197029 |
| 0.59329947  | 0.13203067 |
| 0.567451737 | 0.13203195 |
| 0.458999615 | 0.13203671 |
| 0.271497214 | 0.13205353 |
| 0.251820142 | 0.13211997 |
| 0.689546424 | 0.13225597 |
| 0.451122656 | 0.13231863 |
| 0.239235743 | 0.13233474 |
| 0.337652617 | 0.1323381  |
| 0.170349334 | 0.13234341 |
| 0.204609656 | 0.13237258 |
| 0.329449043 | 0.13241004 |
| 0.605820304 | 0.13242646 |
| 0.555084239 | 0.13250835 |
| 0.597426661 | 0.13254018 |
| 0.537632575 | 0.13261207 |
| 0.420919396 | 0.13266645 |
| 0.6581402   | 0.13269143 |
| 0.168480489 | 0.13276353 |
| 0.19501414  | 0.13278897 |
| 0.394430529 | 0.13287556 |
| 0.603125524 | 0.13287669 |
| 0.321507632 | 0.13288929 |
| 0.272490534 | 0.13290879 |
| 0.733439362 | 0.13294149 |
| 0.665118827 | 0.13300524 |
| 0.710018832 | 0.13303545 |
| 0.51452149  | 0.13304584 |
| 0.587139311 | 0.13305301 |
| 0.311142655 | 0.13306355 |
| 0.589298829 | 0.13307573 |
| 0.526220745 | 0.13307841 |
| 0.327577408 | 0.13307953 |
| 0.439604282 | 0.1330928  |
| 0.214928826 | 0.1331798  |
| 0.504739299 | 0.13327363 |
| 0.459084899 | 0.13331594 |
| 0.293716522 | 0.13332501 |
| 0.551513912 | 0.1333504  |

|             |            |
|-------------|------------|
| 0.568223872 | 0.13336113 |
| 0.416369458 | 0.1334705  |
| 0.484212705 | 0.13349154 |
| 0.602834227 | 0.13355238 |
| 0.637022794 | 0.13356551 |
| 0.179045746 | 0.13357343 |
| 0.702021056 | 0.13363634 |
| 0.390031603 | 0.13364089 |
| 0.364137175 | 0.1336601  |
| 0.59251748  | 0.13387949 |
| 0.361744848 | 0.13391422 |
| 0.647756718 | 0.13391481 |
| 0.270399777 | 0.13393241 |
| 0.234321819 | 0.13396723 |
| 0.673918184 | 0.13398432 |
| 0.779865404 | 0.13402392 |
| 0.528211253 | 0.13404392 |
| 0.58308312  | 0.13406038 |
| 0.435803185 | 0.13423403 |
| 0.538573837 | 0.13427646 |
| 0.280346959 | 0.13433514 |
| 0.705578342 | 0.13434471 |
| 0.670250903 | 0.13435736 |
| 0.287340136 | 0.13441288 |
| 0.621945504 | 0.13442529 |
| 0.243298142 | 0.13453026 |
| 0.362031631 | 0.13453342 |
| 0.266061171 | 0.13455525 |
| 0.406450666 | 0.13455641 |
| 0.63945684  | 0.13459287 |
| 0.210886105 | 0.13460285 |
| 0.71927402  | 0.13462937 |
| 0.483462507 | 0.13464384 |
| 0.728825838 | 0.13469064 |
| 0.677633925 | 0.13469166 |
| 0.621793765 | 0.13470917 |
| 0.347680642 | 0.13474547 |
| 0.205540652 | 0.13477875 |
| 0.250286202 | 0.13478532 |
| 0.503179882 | 0.13485113 |
| 0.255105874 | 0.13487209 |
| 0.360867409 | 0.13488756 |
| 0.525103322 | 0.13492337 |
| 0.515271789 | 0.13494306 |
| 0.499632946 | 0.13496385 |
| 0.55083601  | 0.13500192 |

|             |            |
|-------------|------------|
| 0.239702125 | 0.13507434 |
| 0.575160591 | 0.13509875 |
| 0.716088764 | 0.13524833 |
| 0.633569812 | 0.13525873 |
| 0.428083897 | 0.13534898 |
| 0.245371189 | 0.13535049 |
| 0.376902135 | 0.13538084 |
| 0.17453775  | 0.13539141 |
| 0.321499072 | 0.13540753 |
| 0.357499982 | 0.13546103 |
| 0.18335693  | 0.13546278 |
| 0.797513242 | 0.13547926 |
| 0.404461547 | 0.13552961 |
| 0.137414668 | 0.13556379 |
| 0.323423571 | 0.13572772 |
| 0.682247555 | 0.13576783 |
| 0.646350767 | 0.13584291 |
| 0.465730798 | 0.13585228 |
| 0.299488435 | 0.13589843 |
| 0.704844067 | 0.13593943 |
| 0.463439763 | 0.13594998 |
| 0.635399267 | 0.13610029 |
| 0.471856212 | 0.13610844 |
| 0.645686973 | 0.13624945 |
| 0.297927973 | 0.13629022 |
| 0.617328474 | 0.13629481 |
| 0.328343018 | 0.1363787  |
| 0.612864317 | 0.13649073 |
| 0.214845748 | 0.13650853 |
| 0.472552766 | 0.13652322 |
| 0.686469977 | 0.13658296 |
| 0.694505422 | 0.13660291 |
| 0.205399541 | 0.13661563 |
| 0.30725448  | 0.13662484 |
| 0.464154873 | 0.13663157 |
| 0.49432675  | 0.13667423 |
| 0.520178979 | 0.1367608  |
| 0.675486657 | 0.13679317 |
| 0.366943482 | 0.13680341 |
| 0.27001428  | 0.13680754 |
| 0.574131583 | 0.1368318  |
| 0.599985873 | 0.13686864 |
| 0.194847843 | 0.13687886 |
| 0.587819094 | 0.13691393 |
| 0.525553791 | 0.13702116 |
| 0.68252841  | 0.13705256 |

|             |            |
|-------------|------------|
| 0.668124578 | 0.13706989 |
| 0.18517391  | 0.13712709 |
| 0.26643356  | 0.13712952 |
| 0.708155936 | 0.13718232 |
| 0.593418722 | 0.13718321 |
| 0.612964468 | 0.137189   |
| 0.169804    | 0.13719175 |
| 0.590932876 | 0.13722817 |
| 0.50199571  | 0.13723014 |
| 0.587265813 | 0.1372412  |
| 0.639149558 | 0.13727659 |
| 0.598634004 | 0.1373736  |
| 0.101613319 | 0.13747494 |
| 0.630921935 | 0.13748126 |
| 0.120244496 | 0.1375345  |
| 0.546140135 | 0.13753696 |
| 0.296877667 | 0.13759025 |
| 0.323534559 | 0.13765293 |
| 0.564178499 | 0.13776545 |
| 0.135791581 | 0.13782679 |
| 0.534475107 | 0.13782716 |
| 0.162286751 | 0.13789234 |
| 0.204548855 | 0.13796465 |
| 0.348503509 | 0.13804453 |
| 0.139270383 | 0.13805188 |
| 0.394531566 | 0.13805838 |
| 0.431744807 | 0.13808178 |
| 0.375778692 | 0.13812798 |
| 0.615178344 | 0.13813876 |
| 0.440662736 | 0.13814718 |
| 0.427619235 | 0.13817336 |
| 0.419176268 | 0.13824007 |
| 0.226212319 | 0.13831282 |
| 0.414020129 | 0.13840577 |
| 0.399334474 | 0.13842515 |
| 0.625798034 | 0.1384959  |
| 0.642369705 | 0.13850161 |
| 0.542036209 | 0.13851025 |
| 0.565610269 | 0.13851163 |
| 0.338064371 | 0.13851951 |
| 0.235914633 | 0.1385275  |
| 0.288093065 | 0.1385748  |
| 0.292080059 | 0.13860135 |
| 0.41433038  | 0.13861611 |
| 0.193369342 | 0.13869592 |
| 0.421652085 | 0.13875735 |



|             |            |
|-------------|------------|
| 0.645401148 | 0.13877861 |
| 0.23875957  | 0.13884204 |
| 0.431731922 | 0.13885001 |
| 0.315406535 | 0.13885939 |
| 0.267415612 | 0.13888347 |
| 0.212287466 | 0.13890007 |
| 0.688886008 | 0.13890855 |
| 0.610575283 | 0.13908697 |
| 0.525369233 | 0.13920855 |
| 0.243020842 | 0.1392264  |
| 0.377894435 | 0.13922708 |
| 0.555448158 | 0.13929011 |
| 0.322239535 | 0.1393068  |
| 0.104855611 | 0.13934017 |
| 0.225999777 | 0.13935973 |
| 0.730774442 | 0.13936344 |
| 0.453300694 | 0.13936466 |
| 0.71099076  | 0.13948497 |
| 0.162734926 | 0.13949725 |
| 0.751218773 | 0.13951185 |
| 0.664524997 | 0.13953058 |
| 0.547969594 | 0.1395485  |
| 0.318957915 | 0.13967764 |
| 0.684633647 | 0.13968715 |
| 0.533158205 | 0.13971555 |
| 0.370078993 | 0.13974517 |
| 0.109034587 | 0.13977068 |
| 0.471462132 | 0.13979859 |
| 0.652281708 | 0.13981185 |
| 0.297338093 | 0.13982764 |
| 0.367746754 | 0.1398611  |
| 0.592460422 | 0.13989421 |
| 0.403380414 | 0.139918   |
| 0.33236849  | 0.1399451  |
| 0.54110119  | 0.14003881 |
| 0.612859425 | 0.14008077 |
| 0.348229654 | 0.14008251 |
| 0.641019048 | 0.14015025 |
| 0.511260141 | 0.14015892 |
| 0.158599428 | 0.14017683 |
| 0.700513856 | 0.14020385 |
| 0.645498707 | 0.14022089 |
| 0.557584234 | 0.14022557 |
| 0.679311694 | 0.14023167 |
| 0.678645963 | 0.14034807 |
| 0.250523962 | 0.14039507 |

|             |            |
|-------------|------------|
| 0.572050688 | 0.14040072 |
| 0.451817565 | 0.14051559 |
| 0.376491729 | 0.14056247 |
| 0.411664551 | 0.1405652  |
| 0.578527468 | 0.1405671  |
| 0.309497614 | 0.14063706 |
| 0.472466305 | 0.14071421 |
| 0.295519477 | 0.14083276 |
| 0.30453516  | 0.14085464 |
| 0.434087144 | 0.14091662 |
| 0.158781086 | 0.14092281 |
| 0.233911624 | 0.1409369  |
| 0.276969722 | 0.14094316 |
| 0.719468727 | 0.14094599 |
| 0.437282627 | 0.14094958 |
| 0.662503027 | 0.14096448 |
| 0.533330214 | 0.1410042  |
| 0.323466084 | 0.14122914 |
| 0.50554798  | 0.14124281 |
| 0.733152408 | 0.14138263 |
| 0.328864748 | 0.14151534 |
| 0.664051922 | 0.14151997 |
| 0.285518614 | 0.14154651 |
| 0.39342379  | 0.1416218  |
| 0.585052603 | 0.14166611 |
| 0.670394058 | 0.14169924 |
| 0.343073892 | 0.1417325  |
| 0.094389656 | 0.14174689 |
| 0.067143326 | 0.14178419 |
| 0.501042493 | 0.14178937 |
| 0.451828553 | 0.14179198 |
| 0.130781116 | 0.14187296 |
| 0.537643711 | 0.14200204 |
| 0.525603301 | 0.14207426 |
| 0.622106867 | 0.14211431 |
| 0.47229584  | 0.14214623 |
| 0.537803819 | 0.14215791 |
| 0.557877262 | 0.14216899 |
| 0.531177225 | 0.14218601 |
| 0.583183364 | 0.14220603 |
| 0.549208923 | 0.14223361 |
| 0.343637871 | 0.14223536 |
| 0.582103372 | 0.14234184 |
| 0.496946833 | 0.14240019 |
| 0.509090616 | 0.14242326 |
| 0.318844322 | 0.14256938 |

|             |            |
|-------------|------------|
| 0.338339688 | 0.1425721  |
| 0.688914881 | 0.14257524 |
| 0.646157907 | 0.14260397 |
| 0.613646028 | 0.14265268 |
| 0.354668275 | 0.14273876 |
| 0.584201827 | 0.14274157 |
| 0.521095321 | 0.14278425 |
| 0.189986848 | 0.14279277 |
| 0.570552735 | 0.1427946  |
| 0.417007256 | 0.14279491 |
| 0.281885189 | 0.14286515 |
| 0.40771428  | 0.14287373 |
| 0.545539267 | 0.14291143 |
| 0.516602282 | 0.14291485 |
| 0.568868804 | 0.14298322 |
| 0.657595007 | 0.14301094 |
| 0.260376804 | 0.14302125 |
| 0.479172597 | 0.14311187 |
| 0.149788211 | 0.14312968 |
| 0.215657806 | 0.14313433 |
| 0.511144491 | 0.14315606 |
| 0.709600985 | 0.14317715 |
| 0.403415308 | 0.1432139  |
| 0.487004357 | 0.14335339 |
| 0.468942388 | 0.14336629 |
| 0.270498845 | 0.14340482 |
| 0.586032624 | 0.14345824 |
| 0.692621484 | 0.14353793 |
| 0.621290821 | 0.14358148 |
| 0.329300758 | 0.14359217 |
| 0.144128258 | 0.14368721 |
| 0.741813477 | 0.14380651 |
| 0.313393459 | 0.14389788 |
| 0.34052665  | 0.1439537  |
| 0.53378604  | 0.14396129 |
| 0.65926905  | 0.14398093 |
| 0.595548538 | 0.14402209 |
| 0.683463844 | 0.14411032 |
| 0.267448678 | 0.14411214 |
| 0.378979913 | 0.1441406  |
| 0.461587297 | 0.14418875 |
| 0.568149517 | 0.14419428 |
| 0.180509826 | 0.14420326 |
| 0.491584644 | 0.14420346 |
| 0.439923071 | 0.14422435 |
| 0.557952218 | 0.14424005 |

|             |            |
|-------------|------------|
| 0.235986212 | 0.14425127 |
| 0.421402081 | 0.14432471 |
| 0.555896451 | 0.14433067 |
| 0.220268267 | 0.1443387  |
| 0.295084268 | 0.14436564 |
| 0.376744267 | 0.14439162 |
| 0.656398688 | 0.14443961 |
| 0.407544676 | 0.1445526  |
| 0.6204384   | 0.1446747  |
| 0.325734225 | 0.14468267 |
| 0.33577978  | 0.14469414 |
| 0.1544806   | 0.14470801 |
| 0.378881144 | 0.14473001 |
| 0.451602862 | 0.14473342 |
| 0.632562149 | 0.14474105 |
| 0.558617004 | 0.1447747  |
| 0.265305287 | 0.14493093 |
| 0.221944117 | 0.14495415 |
| 0.222317068 | 0.14495753 |
| 0.378645972 | 0.14496809 |
| 0.678092182 | 0.1449729  |
| 0.596822533 | 0.14503273 |
| 0.243416977 | 0.14504422 |
| 0.426576441 | 0.14506867 |
| 0.212213531 | 0.14523703 |
| 0.509998303 | 0.1453314  |
| 0.368158643 | 0.14542019 |
| 0.489442793 | 0.14544687 |
| 0.445365643 | 0.14544994 |
| 0.336225056 | 0.14552153 |
| 0.264612449 | 0.14567848 |
| 0.665909651 | 0.14576841 |
| 0.618180559 | 0.14579689 |
| 0.255311281 | 0.14584889 |
| 0.705926171 | 0.14592339 |
| 0.507916217 | 0.14594343 |
| 0.298462447 | 0.14596464 |
| 0.670748254 | 0.1460528  |
| 0.268243198 | 0.14608617 |
| 0.301115866 | 0.14612012 |
| 0.129514449 | 0.14618917 |
| 0.516121249 | 0.14621072 |
| 0.580499566 | 0.14623268 |
| 0.172724117 | 0.14624126 |
| 0.54539986  | 0.14625717 |
| 0.68467643  | 0.14636593 |

|             |            |
|-------------|------------|
| 0.436696163 | 0.1463767  |
| 0.450629678 | 0.14643163 |
| 0.511452003 | 0.14644223 |
| 0.39904223  | 0.14657003 |
| 0.443211468 | 0.14669951 |
| 0.27971479  | 0.14672828 |
| 0.676764076 | 0.14678626 |
| 0.243558469 | 0.14679092 |
| 0.364541645 | 0.14683084 |
| 0.651478046 | 0.14684064 |
| 0.287387857 | 0.14691    |
| 0.546548235 | 0.1469441  |
| 0.595112513 | 0.14694485 |
| 0.509794535 | 0.14697977 |
| 0.282533875 | 0.14706402 |
| 0.614197165 | 0.14711447 |
| 0.595076651 | 0.14712099 |
| 0.515000948 | 0.14718541 |
| 0.358648746 | 0.14718831 |
| 0.445693905 | 0.14725199 |
| 0.50100434  | 0.14737574 |
| 0.136106892 | 0.14745345 |
| 0.518483465 | 0.14746826 |
| 0.313351064 | 0.14755091 |
| 0.515766016 | 0.14764041 |
| 0.737198601 | 0.14768963 |
| 0.238038791 | 0.14772538 |
| 0.382921018 | 0.14774814 |
| 0.465792017 | 0.1479214  |
| 0.314517639 | 0.14799449 |
| 0.233683826 | 0.14807945 |
| 0.20430836  | 0.148092   |
| 0.403560022 | 0.14812935 |
| 0.658513541 | 0.14813061 |
| 0.271898646 | 0.14821594 |
| 0.651160586 | 0.14821807 |
| 0.173202837 | 0.14836433 |
| 0.528022432 | 0.14858018 |
| 0.655505966 | 0.14865676 |
| 0.48590709  | 0.14865951 |
| 0.548999585 | 0.14865964 |
| 0.441207615 | 0.14869    |
| 0.681022532 | 0.14872969 |
| 0.628904544 | 0.14874501 |
| 0.311340413 | 0.14893503 |
| 0.564322991 | 0.14894475 |

|             |            |
|-------------|------------|
| 0.545718821 | 0.14901305 |
| 0.675037495 | 0.14901774 |
| 0.65120357  | 0.14910385 |
| 0.366531276 | 0.14912663 |
| 0.542335324 | 0.14913657 |
| 0.443006134 | 0.14916212 |
| 0.614432685 | 0.14931925 |
| 0.533133249 | 0.14934351 |
| 0.626776665 | 0.14935881 |
| 0.334194217 | 0.14940335 |
| 0.153136191 | 0.14947068 |
| 0.359410885 | 0.14956244 |
| 0.566824417 | 0.14960474 |
| 0.72992794  | 0.14961287 |
| 0.469331071 | 0.14964287 |
| 0.209745321 | 0.14967604 |
| 0.624531045 | 0.14991683 |
| 0.142878067 | 0.14992177 |
| 0.544996448 | 0.14994155 |
| 0.385616211 | 0.15000592 |
| 0.480631564 | 0.15004838 |
| 0.329310723 | 0.15009215 |
| 0.275054458 | 0.15010606 |
| 0.6458135   | 0.15011247 |
| 0.69496818  | 0.15014918 |
| 0.38132569  | 0.15017732 |
| 0.41300789  | 0.15030496 |
| 0.688321833 | 0.1505142  |
| 0.322088694 | 0.15053468 |
| 0.525082987 | 0.15057533 |
| 0.563936839 | 0.15069566 |
| 0.486770337 | 0.15069856 |
| 0.281941446 | 0.15071693 |
| 0.170614598 | 0.15075154 |
| 0.398364294 | 0.15083433 |
| 0.470526457 | 0.1508451  |
| 0.327317605 | 0.1508714  |
| 0.444068524 | 0.15091189 |
| 0.508957964 | 0.15096849 |
| 0.320155606 | 0.15109214 |
| 0.300259815 | 0.15119232 |
| 0.153555555 | 0.15128151 |
| 0.587327446 | 0.15139239 |
| 0.425871388 | 0.151457   |
| 0.537374533 | 0.15153926 |
| 0.723312175 | 0.15155451 |

|             |            |
|-------------|------------|
| 0.728993886 | 0.1516279  |
| 0.377288436 | 0.15167164 |
| 0.244641808 | 0.1518264  |
| 0.717574048 | 0.15188469 |
| 0.518590857 | 0.15195619 |
| 0.526179513 | 0.15199559 |
| 0.212681565 | 0.15201457 |
| 0.117392325 | 0.15208822 |
| 0.203148452 | 0.15209875 |
| 0.253267169 | 0.15212848 |
| 0.588779607 | 0.15219004 |
| 0.234951215 | 0.15219106 |
| 0.273428038 | 0.15227934 |
| 0.421652407 | 0.15235018 |
| 0.506447814 | 0.15236332 |
| 0.400532074 | 0.15243657 |
| 0.643617691 | 0.15244025 |
| 0.66594806  | 0.15244955 |
| 0.091906105 | 0.15251285 |
| 0.169926389 | 0.15254435 |
| 0.514794631 | 0.15262674 |
| 0.13285081  | 0.15262838 |
| 0.538565752 | 0.15263681 |
| 0.534962142 | 0.1526939  |
| 0.210864396 | 0.15277187 |
| 0.372200982 | 0.15280633 |
| 0.551150775 | 0.15283216 |
| 0.47160609  | 0.15288681 |
| 0.670743305 | 0.15291645 |
| 0.612443964 | 0.15295171 |
| 0.39118474  | 0.15296645 |
| 0.382056621 | 0.15296915 |
| 0.64089747  | 0.15298403 |
| 0.203328472 | 0.15300008 |
| 0.611311044 | 0.15303574 |
| 0.500364066 | 0.15306293 |
| 0.637709945 | 0.15307052 |
| 0.361992681 | 0.15307601 |
| 0.664895404 | 0.15313179 |
| 0.474263438 | 0.15319507 |
| 0.296255427 | 0.15323636 |
| 0.411817231 | 0.15325315 |
| 0.649988222 | 0.15327102 |
| 0.214980567 | 0.15327575 |
| 0.565335236 | 0.15331465 |
| 0.505681126 | 0.15332364 |

|             |            |
|-------------|------------|
| 0.265994976 | 0.15332888 |
| 0.664508424 | 0.15336027 |
| 0.647413306 | 0.15342354 |
| 0.256330934 | 0.15344386 |
| 0.528416936 | 0.15344466 |
| 0.411374096 | 0.15346641 |
| 0.540374754 | 0.15358578 |
| 0.265597777 | 0.15365054 |
| 0.565240006 | 0.15367118 |
| 0.464642362 | 0.15372361 |
| 0.615763873 | 0.15380103 |
| 0.161084422 | 0.15394188 |
| 0.455001953 | 0.15399619 |
| 0.395920604 | 0.15401524 |
| 0.504287104 | 0.15402903 |
| 0.507653044 | 0.15407434 |
| 0.186722603 | 0.15416944 |
| 0.429959339 | 0.15419593 |
| 0.611297818 | 0.15419635 |
| 0.345196608 | 0.15430637 |
| 0.667899439 | 0.15434485 |
| 0.661780595 | 0.15440693 |
| 0.632410949 | 0.1544313  |
| 0.705983122 | 0.15445221 |
| 0.479961041 | 0.15445438 |
| 0.418273004 | 0.15445777 |
| 0.446476319 | 0.15448213 |
| 0.373002047 | 0.15452792 |
| 0.474354514 | 0.15464217 |
| 0.545898626 | 0.15478303 |
| 0.573074233 | 0.15490884 |
| 0.587005617 | 0.15491313 |
| 0.289302389 | 0.15492542 |
| 0.442273005 | 0.1549987  |
| 0.696502947 | 0.15502377 |
| 0.369123974 | 0.1550651  |
| 0.41665436  | 0.15511827 |
| 0.335137131 | 0.15512877 |
| 0.651030903 | 0.15514935 |
| 0.522480204 | 0.15522313 |
| 0.482114529 | 0.15526364 |
| 0.297364989 | 0.15534665 |
| 0.484181384 | 0.15542116 |
| 0.312545956 | 0.15542344 |
| 0.615755803 | 0.15546076 |
| 0.360080491 | 0.15547557 |



|             |            |
|-------------|------------|
| 0.181465955 | 0.15557749 |
| 0.357246036 | 0.15563206 |
| 0.421407636 | 0.15564756 |
| 0.619100933 | 0.15565173 |
| 0.580400894 | 0.15582159 |
| 0.221931839 | 0.15594422 |
| 0.598072015 | 0.1559978  |
| 0.358454597 | 0.15600645 |
| 0.350768394 | 0.15609139 |
| 0.151241292 | 0.15611281 |
| 0.254882493 | 0.15613571 |
| 0.478299755 | 0.15613843 |
| 0.363220689 | 0.15630353 |
| 0.454103594 | 0.15633119 |
| 0.545245043 | 0.15642642 |
| 0.499239748 | 0.15648162 |
| 0.433966504 | 0.15658586 |
| 0.524625309 | 0.15673439 |
| 0.651514631 | 0.15675964 |
| 0.353695483 | 0.15681519 |
| 0.269219524 | 0.15683225 |
| 0.618251471 | 0.15683503 |
| 0.259292814 | 0.15683851 |
| 0.486764108 | 0.15689383 |
| 0.219204129 | 0.15693992 |
| 0.712646431 | 0.15706963 |
| 0.687571126 | 0.1571227  |
| 0.469651883 | 0.15720348 |
| 0.609715526 | 0.15729951 |
| 0.404080405 | 0.1573167  |
| 0.194157883 | 0.15736601 |
| 0.323811107 | 0.15737578 |
| 0.391415003 | 0.15741415 |
| 0.296467827 | 0.15760739 |
| 0.388799471 | 0.15772133 |
| 0.454978738 | 0.15773175 |
| 0.458412834 | 0.15776794 |
| 0.52804161  | 0.1577779  |
| 0.351776461 | 0.15781009 |
| 0.652745636 | 0.15781343 |
| 0.510347382 | 0.15788107 |
| 0.490459301 | 0.15788655 |
| 0.609326305 | 0.15790462 |
| 0.628419824 | 0.15804659 |
| 0.283109177 | 0.15808581 |
| 0.615560167 | 0.15810602 |

|             |            |
|-------------|------------|
| 0.300874044 | 0.15816134 |
| 0.311341407 | 0.15819273 |
| 0.241444108 | 0.15824443 |
| 0.438165604 | 0.15827419 |
| 0.367808763 | 0.15829024 |
| 0.292850044 | 0.15833406 |
| 0.616251898 | 0.15837977 |
| 0.549483101 | 0.15847865 |
| 0.625720971 | 0.15852384 |
| 0.631425033 | 0.15857853 |
| 0.174891958 | 0.15859768 |
| 0.636186594 | 0.15867157 |
| 0.548665184 | 0.15876864 |
| 0.57852111  | 0.15881028 |
| 0.40911678  | 0.15883118 |
| 0.697027828 | 0.15894171 |
| 0.566707258 | 0.15913356 |
| 0.524347988 | 0.15914723 |
| 0.454872516 | 0.15919357 |
| 0.5806857   | 0.15922198 |
| 0.353138903 | 0.15923576 |
| 0.364527848 | 0.15940099 |
| 0.195786681 | 0.15944598 |
| 0.519532393 | 0.15955008 |
| 0.373853169 | 0.15964492 |
| 0.553638142 | 0.15965008 |
| 0.350386007 | 0.15965537 |
| 0.611265721 | 0.15974089 |
| 0.216147668 | 0.15978303 |
| 0.707374632 | 0.15980784 |
| 0.572759818 | 0.15993202 |
| 0.437507174 | 0.15993876 |
| 0.477372755 | 0.16000979 |
| 0.629039391 | 0.16002776 |
| 0.512696852 | 0.16003461 |
| 0.546804796 | 0.16019726 |
| 0.519018255 | 0.16023582 |
| 0.580873987 | 0.16034557 |
| 0.364543472 | 0.16036018 |
| 0.642756559 | 0.160372   |
| 0.45611477  | 0.16055234 |
| 0.64588094  | 0.16058053 |
| 0.379205574 | 0.16068305 |
| 0.665307849 | 0.16071319 |
| 0.361932217 | 0.160793   |
| 0.441379845 | 0.16079634 |

|             |            |
|-------------|------------|
| 0.477647547 | 0.16080926 |
| 0.463556552 | 0.16082405 |
| 0.239737681 | 0.16093758 |
| 0.529812681 | 0.16113513 |
| 0.7167059   | 0.16138139 |
| 0.229055383 | 0.16144837 |
| 0.576394366 | 0.16151242 |
| 0.570598089 | 0.16151627 |
| 0.380475685 | 0.16156954 |
| 0.172911332 | 0.16175533 |
| 0.211002252 | 0.16180028 |
| 0.515759869 | 0.16181841 |
| 0.351999968 | 0.16193321 |
| 0.373678529 | 0.16197158 |
| 0.39619351  | 0.16197864 |
| 0.695485724 | 0.16206609 |
| 0.461905728 | 0.16210019 |
| 0.595365048 | 0.16217311 |
| 0.462881826 | 0.16219572 |
| 0.556627525 | 0.16228965 |
| 0.111386496 | 0.16235524 |
| 0.630150473 | 0.16278311 |
| 0.641718753 | 0.16280363 |
| 0.338052551 | 0.1628071  |
| 0.40924251  | 0.1629282  |
| 0.597126618 | 0.16295018 |
| 0.296030699 | 0.16298069 |
| 0.708742306 | 0.16304061 |
| 0.622022012 | 0.16332541 |
| 0.530067737 | 0.16346337 |
| 0.250015232 | 0.16347864 |
| 0.467016235 | 0.16350545 |
| 0.221004609 | 0.16360883 |
| 0.502666524 | 0.16361306 |
| 0.630824878 | 0.16376674 |
| 0.624377962 | 0.16386596 |
| 0.520963027 | 0.16388159 |
| 0.600484821 | 0.16391212 |
| 0.20765851  | 0.16397844 |
| 0.577528553 | 0.16405078 |
| 0.222097034 | 0.16421799 |
| 0.462192325 | 0.16422773 |
| 0.412280216 | 0.16427515 |
| 0.607136675 | 0.16435184 |
| 0.345634913 | 0.16440913 |
| 0.281597249 | 0.16451687 |

|             |            |
|-------------|------------|
| 0.100547358 | 0.16455724 |
| 0.188652109 | 0.16462807 |
| 0.414174467 | 0.16468009 |
| 0.497075827 | 0.16471374 |
| 0.586863984 | 0.16474317 |
| 0.637168091 | 0.16474807 |
| 0.367667637 | 0.16477155 |
| 0.45166987  | 0.16478711 |
| 0.428890619 | 0.16481401 |
| 0.679931879 | 0.16497884 |
| 0.336928244 | 0.16521336 |
| 0.34485066  | 0.16521512 |
| 0.559709428 | 0.16522349 |
| 0.607780575 | 0.165279   |
| 0.526426943 | 0.16531485 |
| 0.419639191 | 0.16537497 |
| 0.326895937 | 0.16552247 |
| 0.287329663 | 0.16565109 |
| 0.193863822 | 0.16573521 |
| 0.278150771 | 0.16583532 |
| 0.547507957 | 0.16586424 |
| 0.452923416 | 0.16592316 |
| 0.349272834 | 0.16606332 |
| 0.544549516 | 0.16611244 |
| 0.589510412 | 0.1661986  |
| 0.622602193 | 0.16622658 |
| 0.498515563 | 0.16624102 |
| 0.11467981  | 0.16630119 |
| 0.425587448 | 0.16634534 |
| 0.564518305 | 0.16634778 |
| 0.405863758 | 0.16646606 |
| 0.656433171 | 0.16648873 |
| 0.427572497 | 0.1664894  |
| 0.674427963 | 0.16653894 |
| 0.459570196 | 0.16683889 |
| 0.546989162 | 0.16685325 |
| 0.27763705  | 0.16685574 |
| 0.217736753 | 0.16692837 |
| 0.706156739 | 0.16703518 |
| 0.238849123 | 0.16704606 |
| 0.288963535 | 0.16712795 |
| 0.561524434 | 0.16713489 |
| 0.451962833 | 0.16720036 |
| 0.328405319 | 0.16731578 |
| 0.383578722 | 0.16734282 |
| 0.605027112 | 0.16741299 |

|             |            |
|-------------|------------|
| 0.347776367 | 0.16746731 |
| 0.572370981 | 0.16748442 |
| 0.307289572 | 0.16751015 |
| 0.525644948 | 0.16755895 |
| 0.454306046 | 0.16770777 |
| 0.546183796 | 0.16776542 |
| 0.566995012 | 0.16782583 |
| 0.559726815 | 0.16790561 |
| 0.498972059 | 0.16803147 |
| 0.247383026 | 0.16803857 |
| 0.256692366 | 0.16807716 |
| 0.344065087 | 0.16838916 |
| 0.426391847 | 0.16839837 |
| 0.262595334 | 0.16842625 |
| 0.610577636 | 0.16843334 |
| 0.673031675 | 0.16851797 |
| 0.292256708 | 0.16852787 |
| 0.201723057 | 0.16853867 |
| 0.44757044  | 0.16882117 |
| 0.624626922 | 0.16882744 |
| 0.164715188 | 0.16887816 |
| 0.416416329 | 0.16891416 |
| 0.397456889 | 0.16894214 |
| 0.537193231 | 0.1689781  |
| 0.646390096 | 0.16904084 |
| 0.430234731 | 0.16905341 |
| 0.395767543 | 0.16907825 |
| 0.676113723 | 0.16912538 |
| 0.574337074 | 0.16929988 |
| 0.566856159 | 0.16935666 |
| 0.536909086 | 0.16936957 |
| 0.349898467 | 0.16938763 |
| 0.300389892 | 0.16941376 |
| 0.514992158 | 0.16949422 |
| 0.390354328 | 0.16952305 |
| 0.445634689 | 0.16965842 |
| 0.611884834 | 0.16971583 |
| 0.500332792 | 0.16980401 |
| 0.52828492  | 0.16987639 |
| 0.214176193 | 0.16990561 |
| 0.298708775 | 0.16992841 |
| 0.356580896 | 0.16995008 |
| 0.242119114 | 0.16996867 |
| 0.613128901 | 0.16999153 |
| 0.484130331 | 0.16999746 |
| 0.280321763 | 0.17014342 |

|             |            |
|-------------|------------|
| 0.385421995 | 0.17025696 |
| 0.593317636 | 0.1703642  |
| 0.256051921 | 0.17063219 |
| 0.39401164  | 0.17063661 |
| 0.27518552  | 0.17074542 |
| 0.247501751 | 0.17076936 |
| 0.38524279  | 0.17080961 |
| 0.280064363 | 0.17094359 |
| 0.565985969 | 0.17099448 |
| 0.573842016 | 0.1710382  |
| 0.221947791 | 0.17107949 |
| 0.417162659 | 0.1711183  |
| 0.325084923 | 0.17114728 |
| 0.509624964 | 0.17120928 |
| 0.280779689 | 0.17141619 |
| 0.383533031 | 0.17153723 |
| 0.41225389  | 0.17157398 |
| 0.263797012 | 0.17158036 |
| 0.175000127 | 0.17158234 |
| 0.371468235 | 0.17166749 |
| 0.285713892 | 0.1717045  |
| 0.5416419   | 0.17171365 |
| 0.198804615 | 0.17184043 |
| 0.351400549 | 0.17217111 |
| 0.533437551 | 0.17221694 |
| 0.149335214 | 0.17226055 |
| 0.576858914 | 0.17231802 |
| 0.498455108 | 0.17250624 |
| 0.423524242 | 0.17258332 |
| 0.497714126 | 0.17268163 |
| 0.530515497 | 0.17273    |
| 0.31931161  | 0.17278975 |
| 0.271435663 | 0.17280286 |
| 0.535623506 | 0.17300565 |
| 0.392700253 | 0.17307302 |
| 0.238479386 | 0.17307889 |
| 0.267023508 | 0.17326721 |
| 0.174966097 | 0.17345453 |
| 0.428479241 | 0.17356285 |
| 0.252909594 | 0.17361115 |
| 0.449945259 | 0.17361528 |
| 0.532017234 | 0.17367884 |
| 0.472532439 | 0.1738088  |
| 0.462705103 | 0.17392836 |
| 0.240053305 | 0.17404832 |
| 0.549261543 | 0.17405565 |

|             |            |
|-------------|------------|
| 0.495711992 | 0.17412692 |
| 0.651984719 | 0.17429963 |
| 0.432938437 | 0.17436542 |
| 0.330341088 | 0.17461906 |
| 0.631612462 | 0.17477875 |
| 0.382980386 | 0.17508363 |
| 0.410677619 | 0.17520012 |
| 0.535788051 | 0.17524737 |
| 0.390616484 | 0.17525105 |
| 0.417950907 | 0.17525109 |
| 0.509689367 | 0.17550261 |
| 0.472831129 | 0.17557389 |
| 0.227564975 | 0.17560682 |
| 0.289859189 | 0.1756996  |
| 0.272264339 | 0.17575874 |
| 0.401856029 | 0.17583769 |
| 0.372805079 | 0.17585126 |
| 0.5701611   | 0.1759012  |
| 0.26166316  | 0.17591919 |
| 0.664040687 | 0.17596791 |
| 0.253138388 | 0.17600315 |
| 0.247995579 | 0.17616265 |
| 0.317270621 | 0.1761999  |
| 0.456750342 | 0.17642216 |
| 0.387016686 | 0.17643386 |
| 0.601015247 | 0.17652685 |
| 0.57600707  | 0.17656803 |
| 0.329670603 | 0.17659433 |
| 0.09401205  | 0.17663733 |
| 0.609056795 | 0.17673721 |
| 0.411581963 | 0.17674873 |
| 0.620692738 | 0.1769754  |
| 0.700824179 | 0.17712057 |
| 0.61615275  | 0.17724866 |
| 0.479363756 | 0.17731263 |
| 0.677579825 | 0.17734998 |
| 0.473145966 | 0.17738242 |
| 0.349766841 | 0.17738284 |
| 0.238315025 | 0.17760476 |
| 0.461052411 | 0.17767098 |
| 0.379892285 | 0.17772273 |
| 0.615761109 | 0.17773579 |
| 0.261463121 | 0.17773863 |
| 0.40063698  | 0.17774014 |
| 0.359950913 | 0.1777878  |
| 0.301195268 | 0.17782232 |

|             |            |
|-------------|------------|
| 0.270557041 | 0.17783333 |
| 0.51910128  | 0.17788366 |
| 0.65296947  | 0.1778837  |
| 0.510088843 | 0.17797614 |
| 0.430192201 | 0.1781361  |
| 0.292197594 | 0.17819128 |
| 0.123567429 | 0.17828166 |
| 0.146576154 | 0.17831692 |
| 0.309318136 | 0.1784654  |
| 0.477301801 | 0.17859623 |
| 0.643497326 | 0.17881015 |
| 0.498382289 | 0.17890831 |
| 0.562932737 | 0.17906069 |
| 0.398673624 | 0.17918426 |
| 0.299294228 | 0.17922747 |
| 0.244100788 | 0.17925748 |
| 0.574686461 | 0.17931721 |
| 0.583725022 | 0.1794025  |
| 0.461163069 | 0.1794093  |
| 0.608149845 | 0.17947012 |
| 0.616389521 | 0.17960807 |
| 0.322106345 | 0.17976731 |
| 0.667560431 | 0.17985987 |
| 0.384928378 | 0.17986733 |
| 0.227591968 | 0.17994129 |
| 0.505120559 | 0.17994268 |
| 0.199710811 | 0.18007318 |
| 0.278494549 | 0.18018124 |
| 0.652803909 | 0.18030191 |
| 0.622178993 | 0.18030945 |
| 0.565062113 | 0.18041115 |
| 0.469357673 | 0.18047862 |
| 0.274690299 | 0.18060245 |
| 0.569347987 | 0.18068739 |
| 0.548837534 | 0.18072619 |
| 0.563209428 | 0.18080884 |
| 0.441883304 | 0.18081909 |
| 0.46890798  | 0.18082476 |
| 0.46675518  | 0.18092889 |
| 0.565002214 | 0.18107662 |
| 0.63229306  | 0.18111242 |
| 0.42511457  | 0.18111442 |
| 0.257530941 | 0.18114563 |
| 0.394483385 | 0.1812363  |
| 0.375603903 | 0.18127282 |
| 0.226300198 | 0.18136006 |



|             |            |
|-------------|------------|
| 0.388028337 | 0.18151    |
| 0.511448128 | 0.18157884 |
| 0.445912567 | 0.18181187 |
| 0.300399268 | 0.18204882 |
| 0.339999386 | 0.1821459  |
| 0.486128863 | 0.18227586 |
| 0.581129748 | 0.18264754 |
| 0.553228362 | 0.18274617 |
| 0.303432125 | 0.18276362 |
| 0.544477924 | 0.18293333 |
| 0.264143754 | 0.18296259 |
| 0.321306644 | 0.18303703 |
| 0.406333258 | 0.18319841 |
| 0.322320961 | 0.18322439 |
| 0.164726035 | 0.18323412 |
| 0.570231741 | 0.18325928 |
| 0.574217642 | 0.18343855 |
| 0.485092511 | 0.18346507 |
| 0.562195107 | 0.18350292 |
| 0.62063189  | 0.18353177 |
| 0.312883177 | 0.18355854 |
| 0.575524294 | 0.18366191 |
| 0.572831011 | 0.18407997 |
| 0.354148708 | 0.18411669 |
| 0.363288868 | 0.18415071 |
| 0.357354098 | 0.18424736 |
| 0.313956999 | 0.18429923 |
| 0.296055613 | 0.18430441 |
| 0.478939143 | 0.18432774 |
| 0.281626563 | 0.18438488 |
| 0.699923633 | 0.18447385 |
| 0.296777473 | 0.18463182 |
| 0.365469342 | 0.1846468  |
| 0.602740235 | 0.18468563 |
| 0.328473088 | 0.18475355 |
| 0.229061394 | 0.1847559  |
| 0.131051386 | 0.18484124 |
| 0.252384632 | 0.18494614 |
| 0.259127396 | 0.185193   |
| 0.251930837 | 0.18567415 |
| 0.55784398  | 0.18589783 |
| 0.286571751 | 0.18592737 |
| 0.213671981 | 0.18600253 |
| 0.499245584 | 0.18605861 |
| 0.604919232 | 0.18609769 |
| 0.137430739 | 0.1861255  |

|             |            |
|-------------|------------|
| 0.496680937 | 0.1863285  |
| 0.559271268 | 0.18635061 |
| 0.333585317 | 0.18638471 |
| 0.639312924 | 0.18654419 |
| 0.303049284 | 0.18656601 |
| 0.244918182 | 0.18673899 |
| 0.423340792 | 0.1869472  |
| 0.165011074 | 0.18695441 |
| 0.488001015 | 0.1873595  |
| 0.273176227 | 0.18751878 |
| 0.429250099 | 0.18778292 |
| 0.51694758  | 0.18780266 |
| 0.519324814 | 0.18796621 |
| 0.245562567 | 0.18801507 |
| 0.327787525 | 0.18806828 |
| 0.236500449 | 0.18807885 |
| 0.424305101 | 0.18812693 |
| 0.463757035 | 0.18818606 |
| 0.585356436 | 0.18835035 |
| 0.355622847 | 0.18844473 |
| 0.458793542 | 0.18848002 |
| 0.361278507 | 0.18848929 |
| 0.321032088 | 0.18863443 |
| 0.423096181 | 0.18869956 |
| 0.405774856 | 0.18875007 |
| 0.453121916 | 0.18880368 |
| 0.399269647 | 0.18881739 |
| 0.198834715 | 0.1888893  |
| 0.427738634 | 0.18892141 |
| 0.472484116 | 0.18910916 |
| 0.182403642 | 0.18919338 |
| 0.285237067 | 0.18929594 |
| 0.342182261 | 0.18950045 |
| 0.351325056 | 0.18954487 |
| 0.2287582   | 0.18961138 |
| 0.338241494 | 0.18964938 |
| 0.228823651 | 0.19005924 |
| 0.62315419  | 0.19013073 |
| 0.452396136 | 0.19030706 |
| 0.525171766 | 0.19046949 |
| 0.271616533 | 0.19048952 |
| 0.248324424 | 0.19051411 |
| 0.500548736 | 0.19052022 |
| 0.259151484 | 0.19052067 |
| 0.564801877 | 0.19083699 |
| 0.48987684  | 0.19087401 |

|             |            |
|-------------|------------|
| 0.411700222 | 0.19091455 |
| 0.492701184 | 0.19119566 |
| 0.372848801 | 0.19124192 |
| 0.442455731 | 0.19135938 |
| 0.515259935 | 0.19148336 |
| 0.648327335 | 0.1915121  |
| 0.457977447 | 0.19180424 |
| 0.509111724 | 0.19192371 |
| 0.544362697 | 0.19194365 |
| 0.419758264 | 0.19212024 |
| 0.500176217 | 0.19222266 |
| 0.581708936 | 0.19256325 |
| 0.487236255 | 0.19262533 |
| 0.521767171 | 0.19262681 |
| 0.643130046 | 0.19276304 |
| 0.369315015 | 0.19298602 |
| 0.494105344 | 0.19308267 |
| 0.248357074 | 0.19311007 |
| 0.604857648 | 0.19312447 |
| 0.437679079 | 0.19333401 |
| 0.396732192 | 0.19334256 |
| 0.495694912 | 0.19342713 |
| 0.373525544 | 0.19343461 |
| 0.48749213  | 0.19368134 |
| 0.393995904 | 0.19377801 |
| 0.508506445 | 0.19382346 |
| 0.165581673 | 0.19414707 |
| 0.39305175  | 0.1941518  |
| 0.288589914 | 0.19423855 |
| 0.442196494 | 0.19429543 |
| 0.400182785 | 0.19447817 |
| 0.426990284 | 0.19461299 |
| 0.28431946  | 0.19492897 |
| 0.284950577 | 0.1955655  |
| 0.474895249 | 0.19557461 |
| 0.159997953 | 0.19558138 |
| 0.476104688 | 0.19574948 |
| 0.531659911 | 0.19598759 |
| 0.308884946 | 0.19614178 |
| 0.411599031 | 0.1963909  |
| 0.426699054 | 0.19640087 |
| 0.221416008 | 0.19660641 |
| 0.354994791 | 0.19673015 |
| 0.614210045 | 0.196847   |
| 0.549350274 | 0.19685319 |
| 0.479964715 | 0.19700014 |

|             |            |
|-------------|------------|
| 0.547055566 | 0.19701134 |
| 0.178449663 | 0.1970442  |
| 0.599143546 | 0.19719552 |
| 0.507151023 | 0.19742168 |
| 0.422995675 | 0.19788883 |
| 0.352999882 | 0.19796237 |
| 0.431012839 | 0.19803793 |
| 0.53319213  | 0.19818889 |
| 0.332034857 | 0.19854936 |
| 0.434076775 | 0.1988182  |
| 0.382673124 | 0.19901176 |
| 0.207262471 | 0.19909683 |
| 0.421468529 | 0.1992635  |
| 0.411058838 | 0.19928674 |
| 0.616040022 | 0.19966107 |
| 0.576193137 | 0.19979762 |
| 0.651020699 | 0.19979886 |
| 0.246533717 | 0.19982036 |
| 0.181723451 | 0.20011217 |
| 0.257831381 | 0.20018838 |
| 0.430779794 | 0.20019106 |
| 0.636892866 | 0.20034569 |
| 0.24636345  | 0.2003922  |
| 0.522213591 | 0.20043002 |
| 0.636061912 | 0.20045342 |
| 0.296688612 | 0.20068172 |
| 0.456552443 | 0.200717   |
| 0.457198709 | 0.20079398 |
| 0.546411469 | 0.20080481 |
| 0.573575507 | 0.20089586 |
| 0.530313023 | 0.20094394 |
| 0.499791568 | 0.20106722 |
| 0.314205267 | 0.20122278 |
| 0.43308184  | 0.20150752 |
| 0.234248997 | 0.20154633 |
| 0.480824663 | 0.20158967 |
| 0.435738566 | 0.20168885 |
| 0.346996985 | 0.2020727  |
| 0.626034398 | 0.20208114 |
| 0.409978297 | 0.20219975 |
| 0.492125185 | 0.20239505 |
| 0.303822654 | 0.20248954 |
| 0.293050986 | 0.20253153 |
| 0.344877894 | 0.2028399  |
| 0.594882328 | 0.20292111 |
| 0.546265845 | 0.20299697 |

|             |            |
|-------------|------------|
| 0.347045429 | 0.20302042 |
| 0.540000724 | 0.20321973 |
| 0.566685062 | 0.20338092 |
| 0.343458798 | 0.20377296 |
| 0.540519895 | 0.20387159 |
| 0.288338225 | 0.20392241 |
| 0.596422574 | 0.20433923 |
| 0.534033821 | 0.20480742 |
| 0.620963651 | 0.20485351 |
| 0.417888518 | 0.20505196 |
| 0.493175702 | 0.2052531  |
| 0.429614334 | 0.20529722 |
| 0.316976277 | 0.20543327 |
| 0.449442045 | 0.20549776 |
| 0.483733961 | 0.20629195 |
| 0.308647065 | 0.20630183 |
| 0.557478192 | 0.20633493 |
| 0.499004745 | 0.20643966 |
| 0.496192902 | 0.20653514 |
| 0.256144687 | 0.2066075  |
| 0.122755945 | 0.20690672 |
| 0.608829895 | 0.20707003 |
| 0.390148726 | 0.2071619  |
| 0.493776388 | 0.2071657  |
| 0.411460767 | 0.20735489 |
| 0.298279527 | 0.20740332 |
| 0.455752995 | 0.20740443 |
| 0.266500715 | 0.20768074 |
| 0.488021592 | 0.20771755 |
| 0.232886114 | 0.20774576 |
| 0.475624501 | 0.20792509 |
| 0.447289916 | 0.20794786 |
| 0.287241969 | 0.20827456 |
| 0.341236782 | 0.20846633 |
| 0.271358639 | 0.20849231 |
| 0.365742249 | 0.20873209 |
| 0.443435964 | 0.2087388  |
| 0.216527753 | 0.20879537 |
| 0.409368257 | 0.20892599 |
| 0.635650577 | 0.20927997 |
| 0.281723971 | 0.20932601 |
| 0.467696716 | 0.20942184 |
| 0.379104001 | 0.20947585 |
| 0.565898537 | 0.2096989  |
| 0.425846717 | 0.20984407 |
| 0.487065548 | 0.21006848 |

|             |            |
|-------------|------------|
| 0.300801345 | 0.21022347 |
| 0.315604736 | 0.21044186 |
| 0.453055304 | 0.21056864 |
| 0.3342498   | 0.21078049 |
| 0.22913456  | 0.21129515 |
| 0.442797732 | 0.21130038 |
| 0.306473437 | 0.21155433 |
| 0.648568636 | 0.21159956 |
| 0.483743064 | 0.21190683 |
| 0.547434714 | 0.21206733 |
| 0.387811884 | 0.21222403 |
| 0.585925846 | 0.21227756 |
| 0.651161792 | 0.21245954 |
| 0.490980968 | 0.21250238 |
| 0.63122177  | 0.21305335 |
| 0.579219515 | 0.21337303 |
| 0.614994917 | 0.21351444 |
| 0.50955182  | 0.21357378 |
| 0.548359286 | 0.21414759 |
| 0.45219544  | 0.2142764  |
| 0.234531274 | 0.21432624 |
| 0.521378319 | 0.21442255 |
| 0.194601029 | 0.2144373  |
| 0.432840369 | 0.21443812 |
| 0.403529662 | 0.21450137 |
| 0.448399368 | 0.21454714 |
| 0.606368651 | 0.21459628 |
| 0.470200851 | 0.21521878 |
| 0.266084414 | 0.21535881 |
| 0.376720926 | 0.21548243 |
| 0.622978167 | 0.21549874 |
| 0.51527442  | 0.21582953 |
| 0.292050406 | 0.21585615 |
| 0.286005085 | 0.21598813 |
| 0.32575083  | 0.21601102 |
| 0.195214945 | 0.21618182 |
| 0.353280992 | 0.21635346 |
| 0.336053656 | 0.2163585  |
| 0.442207795 | 0.2165334  |
| 0.363192892 | 0.21657937 |
| 0.50528004  | 0.21667098 |
| 0.321827992 | 0.21785645 |
| 0.349014824 | 0.21848578 |
| 0.491807033 | 0.2185571  |
| 0.323728764 | 0.21864555 |
| 0.199583437 | 0.21875128 |

|             |            |
|-------------|------------|
| 0.343447021 | 0.21881396 |
| 0.51693776  | 0.21887014 |
| 0.196125107 | 0.21907981 |
| 0.634696328 | 0.21959602 |
| 0.536530623 | 0.22013439 |
| 0.241475116 | 0.22019064 |
| 0.458576156 | 0.22058581 |
| 0.265176731 | 0.22062612 |
| 0.443738021 | 0.22079549 |
| 0.551898001 | 0.22091881 |
| 0.425957999 | 0.22128121 |
| 0.479925378 | 0.22156415 |
| 0.524213904 | 0.22170208 |
| 0.27558626  | 0.22174372 |
| 0.532378712 | 0.22193999 |
| 0.562334554 | 0.22264634 |
| 0.46052498  | 0.22322567 |
| 0.523994278 | 0.2232545  |
| 0.489241229 | 0.2234465  |
| 0.402923009 | 0.22355131 |
| 0.251539555 | 0.22381453 |
| 0.277405544 | 0.22397    |
| 0.334996487 | 0.22446789 |
| 0.273398152 | 0.22461813 |
| 0.44492032  | 0.22462676 |
| 0.452602624 | 0.22463657 |
| 0.451641671 | 0.22540289 |
| 0.376301125 | 0.22566908 |
| 0.402248669 | 0.22590925 |
| 0.412753971 | 0.22609023 |
| 0.385404376 | 0.22651259 |
| 0.239344489 | 0.22728418 |
| 0.486032085 | 0.22779273 |
| 0.445152286 | 0.22804516 |
| 0.39653485  | 0.22808251 |
| 0.2922742   | 0.22811195 |
| 0.55747654  | 0.2281122  |
| 0.357983957 | 0.22826118 |
| 0.560906154 | 0.22854384 |
| 0.509559154 | 0.22878617 |
| 0.535891998 | 0.22880328 |
| 0.297744913 | 0.22906043 |
| 0.121158595 | 0.22919725 |
| 0.534264415 | 0.22940124 |
| 0.412675216 | 0.22951664 |
| 0.335398658 | 0.22980131 |

|             |            |
|-------------|------------|
| 0.530903964 | 0.23009128 |
| 0.54526137  | 0.23038345 |
| 0.280525794 | 0.23100351 |
| 0.390576545 | 0.23119523 |
| 0.375438279 | 0.2315611  |
| 0.303122032 | 0.23156419 |
| 0.32349329  | 0.23181629 |
| 0.522889119 | 0.23220654 |
| 0.343123976 | 0.23229778 |
| 0.400276404 | 0.23233118 |
| 0.279387002 | 0.2328256  |
| 0.39029335  | 0.23299787 |
| 0.194535344 | 0.2331446  |
| 0.503010647 | 0.23350718 |
| 0.405888112 | 0.234464   |
| 0.392771214 | 0.23485482 |
| 0.378307117 | 0.2354282  |
| 0.48942072  | 0.23550887 |
| 0.318980203 | 0.23555422 |
| 0.530246712 | 0.23581241 |
| 0.355063817 | 0.23592393 |
| 0.430814081 | 0.23623803 |
| 0.479546476 | 0.23643935 |
| 0.495519491 | 0.23678475 |
| 0.321452372 | 0.23704636 |
| 0.505448172 | 0.23706183 |
| 0.464457873 | 0.23710751 |
| 0.638152586 | 0.23724298 |
| 0.271102628 | 0.23780662 |
| 0.615091458 | 0.2384689  |
| 0.40347374  | 0.23881233 |
| 0.332188316 | 0.23918112 |
| 0.591044967 | 0.23988565 |
| 0.456577005 | 0.24005989 |
| 0.422620546 | 0.24029775 |
| 0.501641688 | 0.24199567 |
| 0.266410092 | 0.24208827 |
| 0.314764083 | 0.2424151  |
| 0.381851465 | 0.242453   |
| 0.291316933 | 0.24248968 |
| 0.424335563 | 0.24269144 |
| 0.266088873 | 0.24395815 |
| 0.566265386 | 0.24405126 |
| 0.55377057  | 0.24424423 |
| 0.568477742 | 0.24520605 |
| 0.55158336  | 0.24576583 |



|             |            |
|-------------|------------|
| 0.373579495 | 0.24611339 |
| 0.349764602 | 0.24653857 |
| 0.477216894 | 0.24659516 |
| 0.306361631 | 0.24753428 |
| 0.442738764 | 0.24772828 |
| 0.218999765 | 0.24776342 |
| 0.170442656 | 0.24799225 |
| 0.344090602 | 0.24818373 |
| 0.270432221 | 0.24912045 |
| 0.350336477 | 0.24927714 |
| 0.311570891 | 0.249297   |
| 0.363847618 | 0.2501432  |
| 0.329899268 | 0.2503376  |
| 0.531783373 | 0.25076239 |
| 0.41395311  | 0.25101426 |
| 0.384768785 | 0.25244377 |
| 0.275395043 | 0.25310494 |
| 0.428014909 | 0.25321432 |
| 0.4900236   | 0.25334603 |
| 0.486480638 | 0.25349551 |
| 0.273395711 | 0.25400108 |
| 0.497553714 | 0.25446118 |
| 0.204944254 | 0.25455302 |
| 0.503246258 | 0.25468032 |
| 0.539713389 | 0.25499291 |
| 0.540496417 | 0.25515402 |
| 0.546840663 | 0.25540651 |
| 0.429449977 | 0.25575437 |
| 0.396527595 | 0.25627536 |
| 0.336195953 | 0.25641488 |
| 0.360339401 | 0.25646463 |
| 0.523966944 | 0.25651704 |
| 0.39400533  | 0.25697738 |
| 0.442736615 | 0.25735624 |
| 0.264256    | 0.25744228 |
| 0.529533768 | 0.25777455 |
| 0.532938795 | 0.25791572 |
| 0.434215327 | 0.25866139 |
| 0.511531087 | 0.25875143 |
| 0.261700352 | 0.26132779 |
| 0.455653759 | 0.26144541 |
| 0.305017501 | 0.26169777 |
| 0.403624068 | 0.26234994 |
| 0.406245732 | 0.26238351 |
| 0.48825705  | 0.26322616 |
| 0.18429434  | 0.26328736 |

|             |            |
|-------------|------------|
| 0.303213139 | 0.26359475 |
| 0.448608443 | 0.26369071 |
| 0.429703318 | 0.26387052 |
| 0.569233021 | 0.26399771 |
| 0.363278191 | 0.26423272 |
| 0.327854415 | 0.26462187 |
| 0.2400869   | 0.26522447 |
| 0.190197427 | 0.26669491 |
| 0.498551358 | 0.26747913 |
| 0.557983848 | 0.26748873 |
| 0.553410831 | 0.26846784 |
| 0.479937549 | 0.26855721 |
| 0.43199357  | 0.26995968 |
| 0.278854557 | 0.26998297 |
| 0.213643382 | 0.2702851  |
| 0.216780108 | 0.2702884  |
| 0.429726768 | 0.27041594 |
| 0.350503771 | 0.27110755 |
| 0.346845797 | 0.27263644 |
| 0.391580848 | 0.27327941 |
| 0.497202125 | 0.27332355 |
| 0.361106258 | 0.27370801 |
| 0.230772988 | 0.27390792 |
| 0.37639747  | 0.27443091 |
| 0.407433748 | 0.27516163 |
| 0.573095728 | 0.27523683 |
| 0.544214019 | 0.27691614 |
| 0.548663643 | 0.27751676 |
| 0.432457893 | 0.27895077 |
| 0.491448011 | 0.27932407 |
| 0.417608816 | 0.28010554 |
| 0.509670048 | 0.28095778 |
| 0.282834098 | 0.28105544 |
| 0.135341405 | 0.28259558 |
| 0.335467314 | 0.2833325  |
| 0.408511759 | 0.28393476 |
| 0.282988288 | 0.28417925 |
| 0.158056727 | 0.28419843 |
| 0.320409168 | 0.28646984 |
| 0.35464194  | 0.28652688 |
| 0.28626496  | 0.28661999 |
| 0.44054327  | 0.28673196 |
| 0.463794949 | 0.28872519 |
| 0.408418032 | 0.28961898 |
| 0.502025146 | 0.29065433 |
| 0.332256173 | 0.29329455 |

|             |            |
|-------------|------------|
| 0.369393836 | 0.29345045 |
| 0.479292566 | 0.29483242 |
| 0.389674836 | 0.29606666 |
| 0.26246582  | 0.29701758 |
| 0.254402233 | 0.29845364 |
| 0.191637793 | 0.29855575 |
| 0.261948689 | 0.2991629  |
| 0.305182427 | 0.29988725 |
| 0.32704836  | 0.30281363 |
| 0.381768647 | 0.3052612  |
| 0.38089076  | 0.30613596 |
| 0.421952911 | 0.31040436 |
| 0.360419251 | 0.31183376 |
| 0.392925684 | 0.32843345 |
| 0.271370815 | 0.33243196 |
| 0.331941378 | 0.3385285  |
| 0.230069372 | 0.35486454 |
| 0.415550931 | 0.35661812 |
| 0.35050556  | 0.36180438 |
| 0.4078126   | 0.36463711 |
| 0.289822759 | 0.38349981 |
