# Supplementary material for: Characterization of the Cartilage DNA Methylome in Knee and Hip Osteoarthritis
Source: PubMed Central journal article supplement — Arthritis Rheumatol. 2014 Aug 26;66(9):2450–60. doi: 10.1002/art.38713 (PMC4314681; doi:10.1002/art.38713), 2014-08-26
Supplement: art0066-2450-sd5.pdf [file art0066-2450-sd5.pdf]

**Supplementary Table 6.** Shared DMLs between the OA hip and OA knee clusters.

| <b>Probe</b> | <b>Gene</b> | <b>CHR</b> |
|--------------|-------------|------------|
| cg25710107   | A2LD1       | 13         |
| cg00134295   | A2M         | 12         |
| cg09866565   | A4GNT       | 3          |
| cg06503456   | ABCC1;ABCC  | 16         |
| cg25928474   | ABCC3;ABCC  | 17         |
| cg24260135   | ABCC8       | 11         |
| cg03471346   | ABL2;ABL2;A | 1          |
| cg14458783   | ABR;ABR     | 17         |
| cg10370025   | ABR;ABR;ABf | 17         |
| cg10996148   | ABR;ABR;ABf | 17         |
| cg01369908   | ABTB2       | 11         |
| cg08663298   | ABTB2       | 11         |
| cg03003335   | ACAP3       | 1          |
| cg09143318   | ACCN1       | 17         |
| cg26142972   | ACCN4;ACCN  | 2          |
| cg18180407   | ACOT11;ACO  | 1          |
| cg11654006   | ACOT7;ACOT  | 1          |
| cg26570804   | ACOT7;ACOT  | 1          |
| cg24597207   | ACOX3;ACOX  | 4          |
| cg26869512   | ACOX3;ACOX  | 4          |
| cg09636163   | ACOXL;ACOX  | 2          |
| cg22002216   | ACSF2       | 17         |
| cg18733757   | ACSL5;ACSL5 | 10         |
| cg24691835   | ACTG2       | 2          |
| cg02057747   | ACTN1;ACTN  | 14         |
| cg26831416   | ACTN4       | 19         |
| cg01234517   | ACTR3C;LRRG | 7          |
| cg00653455   | ACTR8       | 3          |
| cg15211996   | ACTRT2      | 1          |
| cg10852045   | ADAM32      | 8          |
| cg12845177   | ADAMTS10    | 19         |
| cg27015773   | ADAMTS10    | 19         |
| cg24368226   | ADAMTS17    | 15         |
| cg13468759   | ADAMTSL1;A  | 9          |
| cg22731190   | ADAMTSL2;A  | 9          |
| cg02123534   | ADAP1       | 7          |
| cg03754605   | ADARB2      | 10         |
| cg26361041   | ADARB2      | 10         |
| cg06887224   | ADCY2       | 5          |
| cg14418176   | ADCY3       | 2          |
| cg10341242   | ADCY7       | 16         |

|            |             |    |
|------------|-------------|----|
| cg16548911 | ADCY7       | 16 |
| cg07644321 | ADD1;ADD1;  | 4  |
| cg18994606 | ADD3;ADD3;  | 10 |
| cg23328194 | ADRA1A;ADF  | 8  |
| cg02465859 | AFAP1L2;AF  | 10 |
| cg10140126 | AFF3;AFF3   | 2  |
| cg25350306 | AFF3;AFF3   | 2  |
| cg09596958 | AGAP2;AGAF  | 12 |
| cg23387569 | AGAP2;LOC1  | 12 |
| cg11817411 | AGAP3;AGAF  | 7  |
| cg08321684 | AGER;AGER   | 6  |
| cg08057869 | AGXT2L1;AG  | 4  |
| cg03822873 | AHCYL2;AHC  | 7  |
| cg06799735 | AHNAK2      | 14 |
| cg23916896 | AHRR        | 5  |
| cg21052656 | AIP         | 11 |
| cg06483820 | AKAP1       | 17 |
| cg17133734 | AKAP13;AKA  | 15 |
| cg05254518 | AKAP13;AKA  | 15 |
| cg14003853 | AKAP13;AKA  | 15 |
| cg07160992 | AKT1;AKT1;A | 14 |
| cg11314684 | AKT3;AKT3   | 1  |
| cg06400255 | ALDOA       | 16 |
| cg13306478 | ALOX5AP     | 13 |
| cg07910680 | ALPK2       | 18 |
| cg12466599 | ALPL;ALPL   | 1  |
| cg24722348 | ALPL;ALPL   | 1  |
| cg24374161 | AMBRA1      | 11 |
| cg20406747 | AMHR2;AMH   | 12 |
| cg13751113 | AMICA1;AMI  | 11 |
| cg24552844 | AMICA1;AMI  | 11 |
| cg25116615 | ANGPT1      | 8  |
| cg08521995 | ANK1;ANK1;  | 8  |
| cg00488747 | ANKRD11     | 16 |
| cg00770754 | ANKRD11     | 16 |
| cg09420319 | ANKRD11     | 16 |
| cg09486407 | ANKRD11     | 16 |
| cg10343327 | ANKRD2;ANK  | 10 |
| cg24065504 | ANKRD22     | 10 |
| cg01442620 | ANKRD27     | 19 |
| cg13941760 | ANKRD44     | 2  |
| cg16411361 | ANKRD44     | 2  |
| cg00794673 | ANKS1A      | 6  |
| cg03613003 | ANO1;ANO1   | 11 |
| cg13767135 | ANO1;ANO1   | 11 |
| cg15767218 | ANO1;ANO1   | 11 |

|            |             |    |
|------------|-------------|----|
| cg26401673 | ANO10       | 3  |
| cg02278646 | ANO6;ANO6;  | 12 |
| cg24530041 | ANPEP       | 15 |
| cg20836795 | ANTXR1;ANT  | 2  |
| cg23258615 | ANXA11;ANX  | 10 |
| cg19130824 | ANXA5       | 4  |
| cg03832197 | AOX2P       | 2  |
| cg02415661 | AP1M1;AP1M  | 19 |
| cg27205902 | AP2A2       | 11 |
| cg11100795 | AP3B1       | 5  |
| cg02349866 | AP3S2;AP3S2 | 15 |
| cg27216937 | APBB1;APBB  | 11 |
| cg23877017 | APBB2;APBB  | 4  |
| cg25611723 | APCDD1      | 18 |
| cg23729763 | APLP2;APLP2 | 11 |
| cg25354657 | APLP2;APLP2 | 11 |
| cg17548735 | APOBEC2;AP  | 6  |
| cg24424889 | APOBEC3H;A  | 22 |
| cg11911305 | APOC1P1;AP  | 19 |
| cg07713361 | APOL1;APOL  | 22 |
| cg09432376 | APOL6       | 22 |
| cg14690065 | APOL6       | 22 |
| cg05963604 | APPL1       | 3  |
| cg04372674 | AQP1        | 7  |
| cg09676669 | AQP1        | 7  |
| cg10132917 | AQP1        | 7  |
| cg15373767 | AQP1        | 7  |
| cg18307978 | AQP1        | 7  |
| cg25075794 | AQP1        | 7  |
| cg25230363 | AQP1        | 7  |
| cg11827925 | AQP1;AQP1   | 7  |
| cg01381498 | ARHGAP10    | 4  |
| cg26282731 | ARHGAP10    | 4  |
| cg14575356 | ARHGAP18    | 6  |
| cg27244773 | ARHGAP27;A  | 17 |
| cg03705571 | ARHGEF10    | 8  |
| cg06807837 | ARHGEF10    | 8  |
| cg07694735 | ARHGEF10    | 8  |
| cg20149022 | ARHGEF10    | 8  |
| cg22223001 | ARHGEF10    | 8  |
| cg07233343 | ARHGEF10L;  | 1  |
| cg11229273 | ARHGEF3     | 3  |
| cg01774027 | ARID3A      | 19 |
| cg18522931 | ARID5B      | 10 |
| cg05204104 | ARL4C;ARL4C | 2  |
| cg04642300 | ARMC2       | 6  |

|            |             |    |
|------------|-------------|----|
| cg19708986 | ARNT2       | 15 |
| cg00970435 | ARSG        | 17 |
| cg06160171 | ARSJ        | 4  |
| cg15922611 | ARSJ        | 4  |
| cg23902076 | ASAP2;ASAP: | 2  |
| cg24654025 | ASB13;ASB1: | 10 |
| cg05277504 | ASPSCR1     | 17 |
| cg12374579 | ASPSCR1     | 17 |
| cg14419393 | ASPSCR1     | 17 |
| cg22949575 | ASPSCR1     | 17 |
| cg23928512 | ASPSCR1     | 17 |
| cg26955287 | ASPSCR1     | 17 |
| cg14010829 | ASS1;ASS1   | 9  |
| cg13792444 | ASTN2;ASTN: | 9  |
| cg20363931 | ATE1;ATE1   | 10 |
| cg20839205 | ATOH8       | 2  |
| cg18256640 | ATP10A      | 15 |
| cg13858127 | ATP11A;ATP: | 13 |
| cg01448881 | ATP1A2      | 1  |
| cg26009832 | ATP1B1;ATP: | 1  |
| cg02286270 | ATP8A2      | 13 |
| cg19566879 | ATXN1;ATXN  | 6  |
| cg22274117 | ATXN1;ATXN  | 6  |
| cg26843612 | ATXN1;ATXN  | 6  |
| cg07932199 | ATXN2       | 12 |
| cg21829116 | ATXN7L1     | 7  |
| cg04601228 | AUTS2;AUTS: | 7  |
| cg14818546 | AUTS2;AUTS: | 7  |
| cg21557473 | AUTS2;AUTS: | 7  |
| cg26390598 | B3GALT5;B3G | 21 |
| cg27121870 | B3GAT1;B3G  | 11 |
| cg11472422 | B3GNTL1     | 17 |
| cg21688152 | B3GNTL1     | 17 |
| cg24962672 | B3GNTL1     | 17 |
| cg13858803 | B4GALT1     | 9  |
| cg09790829 | BACH2;BACH  | 6  |
| cg11559054 | BACH2;BACH  | 6  |
| cg17486314 | BACH2;BACH  | 6  |
| cg23532322 | BAIAP2;BAIA | 17 |
| cg09840386 | BAIAP2;BAIA | 17 |
| cg12475142 | BAIAP2;BAIA | 17 |
| cg27551910 | BAIAP2;BAIA | 17 |
| cg05762553 | BANP;BANP   | 16 |
| cg09870004 | BANP;BANP   | 16 |
| cg27058702 | BANP;BANP   | 16 |
| cg13267247 | BAT2        | 6  |

|            |              |    |
|------------|--------------|----|
| cg04536765 | BAT3;BAT3;B  | 6  |
| cg04006266 | BBS1         | 11 |
| cg09144098 | BBS2         | 16 |
| cg05891572 | BBS9;BBS9;B  | 7  |
| cg22161706 | BBS9;BBS9;B  | 7  |
| cg08284564 | BCAR1;BCAR   | 16 |
| cg06888900 | BCAR1;BCAR   | 16 |
| cg24965479 | BCAS3;BCAS:  | 17 |
| cg01636910 | BCL10        | 1  |
| cg17935536 | BCL11A;BCL1  | 2  |
| cg13758331 | BCL2L11;BCL  | 2  |
| cg27087650 | BCL3         | 19 |
| cg20088756 | BEGAIN;BEG,  | 14 |
| cg01963573 | BEND3        | 6  |
| cg00658449 | BEYLA;BEYLA  | 8  |
| cg18815565 | BFSP1        | 20 |
| cg09996284 | BGLAP        | 1  |
| cg11519176 | BGLAP        | 1  |
| cg23729443 | BGLAP        | 1  |
| cg22641201 | BICC1        | 10 |
| cg15270350 | BIRC5;BIRC5; | 17 |
| cg24890964 | BLCAP;BLCAF  | 20 |
| cg14579118 | BLVRA        | 7  |
| cg26665274 | BMP2         | 20 |
| cg22023826 | BMP5         | 6  |
| cg21752295 | BMP6         | 6  |
| cg09807875 | BMPER        | 7  |
| cg02365648 | BNIP3        | 10 |
| cg06147895 | BNIP3        | 10 |
| cg02858625 | BOC          | 3  |
| cg13071869 | BOC          | 3  |
| cg13272743 | BOC          | 3  |
| cg15111495 | BOC          | 3  |
| cg06024391 | BPGM;BPGM    | 7  |
| cg02983911 | BPI          | 20 |
| cg26534847 | BPI          | 20 |
| cg01294253 | BRD3         | 9  |
| cg03657791 | BRD4         | 19 |
| cg01446612 | BRI3BP       | 12 |
| cg15161050 | BRI3BP       | 12 |
| cg12152068 | BSN          | 3  |
| cg20092122 | BST2         | 19 |
| cg06766016 | BTBD19       | 1  |
| cg13442386 | BTBD9;BTBD   | 6  |
| cg01269795 | BTN3A3;BTN   | 6  |
| cg05496768 | C10orf11     | 10 |

|            |               |    |
|------------|---------------|----|
| cg14207539 | C10orf11      | 10 |
| cg23264016 | C10orf11      | 10 |
| cg24280832 | C10orf11      | 10 |
| cg09411597 | C10orf18      | 10 |
| cg17502312 | C10orf18      | 10 |
| cg10775039 | C10orf71;C10  | 10 |
| cg18895336 | C10orf72      | 10 |
| cg10627429 | C10orf81      | 10 |
| cg11204562 | C10orf81      | 10 |
| cg12490907 | C11orf41      | 11 |
| cg07188648 | C11orf88;C11  | 11 |
| cg06579738 | C11orf92      | 11 |
| cg19879537 | C12orf34      | 12 |
| cg09166410 | C13orf16      | 13 |
| cg24169915 | C14orf177;C14 | 14 |
| cg00780666 | C14orf179;C14 | 14 |
| cg21032266 | C14orf43;C14  | 14 |
| cg23938483 | C14orf43;C14  | 14 |
| cg24128590 | C14orf43;C14  | 14 |
| cg03536657 | C15orf28;AN   | 15 |
| cg12609829 | C15orf53      | 15 |
| cg02319067 | C16orf54      | 16 |
| cg26285698 | C16orf54;C16  | 16 |
| cg07835443 | C16orf55      | 16 |
| cg26923629 | C16orf71      | 16 |
| cg26967566 | C16orf74      | 16 |
| cg21465176 | C17orf101;C17 | 17 |
| cg25490145 | C17orf101;C17 | 17 |
| cg01435401 | C17orf97      | 17 |
| cg24780966 | C18orf1;C18   | 18 |
| cg05344495 | C19orf77      | 19 |
| cg06834507 | C1orf106;C10  | 1  |
| cg17131183 | C1orf113;C10  | 1  |
| cg17518550 | C1orf150      | 1  |
| cg01722868 | C1orf161      | 1  |
| cg23068939 | C1orf162      | 1  |
| cg19375403 | C1orf174      | 1  |
| cg27446570 | C1orf174      | 1  |
| cg15324917 | C1orf198;C10  | 1  |
| cg07582892 | C1orf21       | 1  |
| cg21118367 | C1orf21       | 1  |
| cg21777154 | C1orf21       | 1  |
| cg15644413 | C1orf216      | 1  |
| cg26788737 | C1orf55       | 1  |
| cg21582311 | C1orf96       | 1  |
| cg18157896 | C20orf141;LC  | 20 |

|            |              |    |
|------------|--------------|----|
| cg09203029 | C20orf20     | 20 |
| cg06787912 | C21orf82;C2: | 21 |
| cg12003230 | C21orf84     | 21 |
| cg25819429 | C2orf48      | 2  |
| cg04499514 | C3AR1        | 12 |
| cg16217908 | C3orf52      | 3  |
| cg14740771 | C4BPB;C4BPI  | 1  |
| cg06005199 | C4orf23      | 4  |
| cg09774649 | C4orf23      | 4  |
| cg11036672 | C4orf23      | 4  |
| cg23210109 | C4orf44;C4oi | 4  |
| cg10224107 | C5AR1;C5AR:  | 19 |
| cg08470180 | C5orf24;C5oi | 5  |
| cg00287773 | C5orf32      | 5  |
| cg08927631 | C5orf33;C5oi | 5  |
| cg03653573 | C5orf56      | 5  |
| cg25534601 | C6orf123     | 6  |
| cg02917603 | C6orf129     | 6  |
| cg19635401 | C6orf204;PLI | 6  |
| cg01343703 | C7orf50;C7oi | 7  |
| cg11360546 | C7orf50;C7oi | 7  |
| cg21255128 | C7orf50;C7oi | 7  |
| cg08626653 | C7orf51      | 7  |
| cg24777710 | C7orf54;SND  | 7  |
| cg03036214 | CA12;CA12    | 15 |
| cg25919221 | CA6          | 1  |
| cg21039723 | CAB39;CAB3:  | 2  |
| cg02468320 | CACNA1C;CA   | 12 |
| cg13939602 | CACNA1C;CA   | 12 |
| cg16728539 | CACNA1C;CA   | 12 |
| cg10517230 | CACNA1G;CA   | 17 |
| cg19075717 | CACNA1G;CA   | 17 |
| cg07890233 | CACNA1H;CA   | 16 |
| cg15828524 | CACNB3       | 12 |
| cg03505501 | CADM1;CADI   | 11 |
| cg11425149 | CALD1;CALD:  | 7  |
| cg12273284 | CAMK1D;CAI   | 10 |
| cg05379597 | CAMK2G;CAI   | 10 |
| cg17541002 | CAMKK2;CAM   | 12 |
| cg21583016 | CAMTA1       | 1  |
| cg10664272 | CAPG         | 2  |
| cg06970290 | CAPN1        | 11 |
| cg16615776 | CAPN10;CAP   | 2  |
| cg19807694 | CAPN8        | 1  |
| cg03654273 | CAPZB        | 1  |
| cg05820435 | CAPZB        | 1  |

|            |             |    |
|------------|-------------|----|
| cg06360604 | CAPZB       | 1  |
| cg15136975 | CAPZB       | 1  |
| cg26818786 | CARD6       | 5  |
| cg10279148 | CARHSP1;CA  | 16 |
| cg08862742 | CARS;CARS;C | 11 |
| cg05446253 | CASKIN2;CAS | 17 |
| cg15064681 | CASQ2       | 1  |
| cg09729182 | CASR        | 3  |
| cg08732950 | CBFA2T3     | 16 |
| cg05540133 | CBFA2T3;CBF | 16 |
| cg01544580 | CBX1        | 17 |
| cg12580580 | CCDC109A    | 10 |
| cg21616935 | CCDC11      | 18 |
| cg07220903 | CCDC12      | 3  |
| cg11134246 | CCDC24      | 1  |
| cg26534677 | CCDC25      | 8  |
| cg12879038 | CCDC57      | 17 |
| cg20780302 | CCDC57      | 17 |
| cg08365738 | CCDC80;CCD  | 3  |
| cg12797157 | CCDC88B     | 11 |
| cg02932854 | CCL24       | 7  |
| cg11303839 | CCL26       | 7  |
| cg18407309 | CCL3        | 17 |
| cg08656816 | CCL5        | 17 |
| cg03744842 | CCM2;CCM2   | 7  |
| cg18205668 | CCM2;CCM2   | 7  |
| cg04717045 | CCND1       | 11 |
| cg06539449 | CCND1       | 11 |
| cg02950701 | CCNY;CCNY   | 10 |
| cg09509673 | CCR10;CNTN  | 17 |
| cg23817981 | CCR4        | 3  |
| cg07248223 | CCR7        | 17 |
| cg16047279 | CCR7        | 17 |
| cg18599081 | CCRL2;CCRL2 | 3  |
| cg23350385 | CCRL2;CCRL2 | 3  |
| cg19090861 | CD248       | 11 |
| cg13790288 | CD28        | 2  |
| cg04098585 | CD28;CD28   | 2  |
| cg07458509 | CD320;CD320 | 19 |
| cg14082886 | CD44;CD44;C | 11 |
| cg19408145 | CD48        | 1  |
| cg20868817 | CD48        | 1  |
| cg04188351 | CD59;CD59;C | 11 |
| cg07440264 | CD59;CD59;C | 11 |
| cg23903301 | CD59;CD59;C | 11 |
| cg13014558 | CD6         | 11 |



|            |             |    |
|------------|-------------|----|
| cg11848173 | CD63;CD63   | 12 |
| cg21108085 | CD82;CD82   | 11 |
| cg07813265 | CDC14A;CDC  | 1  |
| cg07341609 | CDC42EP1    | 22 |
| cg15035133 | CDC42EP1    | 22 |
| cg27613998 | CDC42EP3    | 2  |
| cg24527183 | CDC42SE2;CI | 5  |
| cg09220326 | CDCP1;CDCP  | 3  |
| cg02973961 | CDH11       | 16 |
| cg09415485 | CDH13       | 16 |
| cg04304802 | CDH23       | 10 |
| cg13714026 | CDH23;CDH2  | 10 |
| cg19615295 | CDH26;CDH2  | 20 |
| cg05376601 | CDH3        | 16 |
| cg14139051 | CDK14       | 7  |
| cg01720722 | CDK18;CDK1  | 1  |
| cg05101437 | CDK6;CDK6   | 7  |
| cg23342625 | CDKAL1      | 6  |
| cg23241878 | CEACAM21;C  | 19 |
| cg26542660 | CEP135      | 4  |
| cg22092521 | CFD         | 19 |
| cg06633978 | CFDP1       | 16 |
| cg12944530 | CFLAR;CFLAR | 2  |
| cg25198049 | CGN         | 1  |
| cg16767221 | CGNL1       | 15 |
| cg18670236 | CHCHD6      | 3  |
| cg27567495 | CHDH        | 3  |
| cg18451156 | CHFR;CHFR;C | 12 |
| cg20066677 | CHFR;CHFR;C | 12 |
| cg21232015 | CHFR;CHFR;C | 12 |
| cg24532476 | CHFR;CHFR;C | 12 |
| cg13318256 | CHKA;CHKA   | 11 |
| cg06523556 | CHRNA6      | 8  |
| cg09632936 | CHRNA9      | 4  |
| cg18406852 | CHST10      | 2  |
| cg00608661 | CHST11      | 12 |
| cg11117177 | CHST11      | 12 |
| cg16861964 | CHST11      | 12 |
| cg07921503 | CHST12      | 7  |
| cg18664965 | CHST13      | 3  |
| cg13902101 | CHSY1       | 15 |
| cg03339668 | CIT         | 12 |
| cg26097051 | CIT         | 12 |
| cg07180571 | CLASP1;CLAS | 2  |
| cg12051116 | CLASP1;CLAS | 2  |
| cg13790426 | CLCC1;CLCC1 | 1  |

|            |             |    |
|------------|-------------|----|
| cg21660130 | CLCNKB      | 1  |
| cg11744304 | CLDN15      | 7  |
| cg03217729 | CLEC16A     | 16 |
| cg08321576 | CLEC2B;CLEC | 12 |
| cg03447908 | CLEC3B      | 3  |
| cg13730618 | CLIC6       | 21 |
| cg03058520 | CLK3;CLK3   | 15 |
| cg02330500 | CLMN        | 14 |
| cg05239310 | CLMN        | 14 |
| cg00865429 | CLNK        | 4  |
| cg03254067 | CLNK        | 4  |
| cg12182284 | CLTB;CLTB   | 5  |
| cg00326231 | CLTCL1;CLTC | 22 |
| cg03129774 | CLUAP1      | 16 |
| cg05705335 | CMIP        | 16 |
| cg06896529 | CMIP;CMIP   | 16 |
| cg16353318 | CMIP;CMIP   | 16 |
| cg05226518 | CNIH        | 14 |
| cg09988837 | CNIH3       | 1  |
| cg16175941 | CNKSR3      | 6  |
| cg27269110 | CNKSR3      | 6  |
| cg12448539 | CNN3        | 1  |
| cg11812748 | CNST;CNST   | 1  |
| cg14131220 | CNTFR;CNTFI | 9  |
| cg00866054 | COL11A2;CO  | 6  |
| cg00920162 | COL11A2;CO  | 6  |
| cg01194674 | COL11A2;CO  | 6  |
| cg01412022 | COL11A2;CO  | 6  |
| cg02230225 | COL11A2;CO  | 6  |
| cg04249605 | COL11A2;CO  | 6  |
| cg08077736 | COL11A2;CO  | 6  |
| cg09261794 | COL11A2;CO  | 6  |
| cg10736955 | COL11A2;CO  | 6  |
| cg12061370 | COL11A2;CO  | 6  |
| cg12228461 | COL11A2;CO  | 6  |
| cg12881453 | COL11A2;CO  | 6  |
| cg12947757 | COL11A2;CO  | 6  |
| cg13617209 | COL11A2;CO  | 6  |
| cg14683730 | COL11A2;CO  | 6  |
| cg15173443 | COL11A2;CO  | 6  |
| cg15818109 | COL11A2;CO  | 6  |
| cg18375610 | COL11A2;CO  | 6  |
| cg18671115 | COL11A2;CO  | 6  |
| cg20269729 | COL11A2;CO  | 6  |
| cg22161893 | COL11A2;CO  | 6  |
| cg22748722 | COL11A2;CO  | 6  |

|            |             |    |
|------------|-------------|----|
| cg24311693 | COL11A2;CO  | 6  |
| cg25482983 | COL11A2;CO  | 6  |
| cg26322749 | COL11A2;CO  | 6  |
| cg26867987 | COL11A2;CO  | 6  |
| cg26981781 | COL11A2;CO  | 6  |
| cg00505762 | COL11A2;CO  | 6  |
| cg01680268 | COL11A2;CO  | 6  |
| cg01806857 | COL11A2;CO  | 6  |
| cg03783258 | COL11A2;CO  | 6  |
| cg11411509 | COL11A2;CO  | 6  |
| cg11835806 | COL11A2;CO  | 6  |
| cg17591573 | COL11A2;CO  | 6  |
| cg19628686 | COL11A2;CO  | 6  |
| cg21509966 | COL11A2;CO  | 6  |
| cg22501449 | COL11A2;CO  | 6  |
| cg23704085 | COL11A2;CO  | 6  |
| cg24864639 | COL11A2;CO  | 6  |
| cg20436086 | COL13A1;CO  | 10 |
| cg02186748 | COL1A1      | 17 |
| cg14562086 | COL1A1      | 17 |
| cg14700325 | COL1A1      | 17 |
| cg18618815 | COL1A1      | 17 |
| cg25026926 | COL1A1      | 17 |
| cg06299997 | COL1A2      | 7  |
| cg10368049 | COL1A2      | 7  |
| cg23348014 | COL1A2      | 7  |
| cg13079333 | COL20A1     | 20 |
| cg08760493 | COL25A1;CO  | 4  |
| cg13427810 | COL27A1     | 9  |
| cg10275917 | COL28A1     | 7  |
| cg01906695 | COL2A1;COL: | 12 |
| cg08715466 | COL2A1;COL: | 12 |
| cg04887675 | COL4A1      | 13 |
| cg18114040 | COL4A2      | 13 |
| cg13618741 | COL5A1      | 9  |
| cg22247792 | COL6A2;COL: | 21 |
| cg10979567 | COL6A3;COL: | 2  |
| cg20502977 | COL6A3;COL: | 2  |
| cg04869122 | COL6A3;COL: | 2  |
| cg21175685 | COL8A1;MIR: | 3  |
| cg06598544 | COL9A3      | 20 |
| cg24888814 | COPZ1       | 12 |
| cg00876141 | CORIN       | 4  |
| cg12449974 | CORO2B      | 15 |
| cg10423607 | CPA6;CPA6   | 8  |
| cg01708636 | CPE         | 4  |

|            |                |    |
|------------|----------------|----|
| cg19464524 | CPEB3          | 10 |
| cg26426690 | CPEB3          | 10 |
| cg22881750 | CPNE5          | 6  |
| cg15211864 | CPT1A;CPT1A    | 11 |
| cg26906629 | CPT1A;CPT1A    | 11 |
| cg00233633 | CPVL;CPVL      | 7  |
| cg19573230 | CREB3L2        | 7  |
| cg12552104 | CREB5;CREB5    | 7  |
| cg13495373 | CREB5;CREB5    | 7  |
| cg19559984 | CREB5;CREB5    | 7  |
| cg19588408 | CREB5;CREB5    | 7  |
| cg04704487 | CRISPLD2       | 16 |
| cg02961385 | CRTC1;CRTC1    | 19 |
| cg03073714 | CRY1           | 12 |
| cg20704330 | CSF2           | 5  |
| cg00158770 | CSGALNACT1     | 8  |
| cg12059540 | CSGALNACT1     | 8  |
| cg14722693 | CSGALNACT1     | 8  |
| cg06129556 | CSNK1G1        | 15 |
| cg25581222 | CSNK1G1        | 15 |
| cg24168221 | CST9           | 20 |
| cg18618429 | CSTA           | 3  |
| cg07237540 | CTDP1;CTDP1    | 18 |
| cg12386061 | CTDSPL;CTDSPL  | 3  |
| cg05740575 | CTHRC1         | 8  |
| cg06968859 | CTNNA2;CTNNA2  | 2  |
| cg03206537 | CTSA;CTSA;CTSA | 20 |
| cg16118839 | CTSC;CTSC;CTSC | 11 |
| cg01932691 | CTSG           | 14 |
| cg18245281 | CTSZ           | 20 |
| cg23679724 | CTSZ           | 20 |
| cg07663344 | CTTN;CTTN      | 11 |
| cg08581745 | CUBN           | 10 |
| cg25913882 | CUBN           | 10 |
| cg20080282 | CUL5           | 11 |
| cg02911387 | CUX1;CUX1;CUX1 | 7  |
| cg14466759 | CUX1;CUX1;CUX1 | 7  |
| cg20567148 | CUX1;CUX1;CUX1 | 7  |
| cg24183566 | CUX1;CUX1;CUX1 | 7  |
| cg24420432 | CUX1;CUX1;CUX1 | 7  |
| cg26570844 | CUX1;CUX1;CUX1 | 7  |
| cg01257799 | CXCR5          | 11 |
| cg18499750 | CYB561;CYB561  | 17 |
| cg25098174 | CYB561;CYB561  | 17 |
| cg02603251 | CYFIP2;CYFIP2  | 5  |
| cg21181051 | CYP20A1        | 2  |

|            |             |    |
|------------|-------------|----|
| cg00999152 | CYP26B1     | 2  |
| cg01959421 | CYP26B1     | 2  |
| cg09233204 | CYP26C1     | 10 |
| cg17461336 | CYP3A43;CYF | 7  |
| cg20293609 | CYR61       | 1  |
| cg08687948 | CYTH3       | 7  |
| cg20492034 | CYTH3       | 7  |
| cg05643545 | CYTSB;CYTSB | 17 |
| cg09818912 | CYTSB;CYTSB | 17 |
| cg20290367 | CYTSB;CYTSB | 17 |
| cg06454084 | DACT3       | 19 |
| cg08906015 | DACT3       | 19 |
| cg23976388 | DAGLA       | 11 |
| cg05473987 | DAP         | 5  |
| cg18801045 | DAP         | 5  |
| cg19633004 | DAP         | 5  |
| cg21244322 | DAPK2       | 15 |
| cg09365002 | DAXX;DAXX;I | 6  |
| cg09597022 | DAXX;DAXX;I | 6  |
| cg22697517 | DBF4B;DBF4I | 17 |
| cg02872476 | DBNDD1      | 16 |
| cg02575483 | DCBLD1      | 6  |
| cg08514408 | DCK         | 4  |
| cg23574583 | DCLK1       | 13 |
| cg22806908 | DCP1A       | 3  |
| cg20202112 | DCTN1;DCTN  | 2  |
| cg01820584 | DCUN1D4;DC  | 4  |
| cg16707952 | DDR1;DDR1   | 6  |
| cg05883128 | DDX60       | 4  |
| cg27040700 | DECR1       | 8  |
| cg11721464 | DEDD2       | 19 |
| cg14189583 | DEDD2       | 19 |
| cg13618623 | DENND1A;Df  | 9  |
| cg08379738 | DENND1C     | 19 |
| cg07580128 | DENND3      | 8  |
| cg21442881 | DENND3      | 8  |
| cg23224619 | DGKD;DGKD   | 2  |
| cg02920600 | DGKI        | 7  |
| cg22718636 | DGKQ        | 4  |
| cg10177197 | DHCR24      | 1  |
| cg10523319 | DHRS3       | 1  |
| cg13624631 | DHRS7       | 14 |
| cg14777519 | DHX30;DHX3  | 3  |
| cg20592691 | DIAPH3;DIAP | 13 |
| cg06492521 | DIP2C       | 10 |
| cg09782637 | DIP2C       | 10 |

|            |              |    |
|------------|--------------|----|
| cg11423998 | DIP2C        | 10 |
| cg13477178 | DIP2C        | 10 |
| cg17861458 | DIP2C        | 10 |
| cg18442019 | DIP2C        | 10 |
| cg25301103 | DIP2C        | 10 |
| cg04097334 | DIRC1        | 2  |
| cg07328664 | DIS3L2       | 2  |
| cg26148020 | DLC1         | 8  |
| cg27395342 | DLC1;DLC1    | 8  |
| cg17989952 | DLC1;DLC1;D  | 8  |
| cg15681239 | DLEC1;DLEC1  | 3  |
| cg24182581 | DLG2;DLG2;E  | 11 |
| cg25856632 | DLG4;DLG4    | 17 |
| cg14157570 | DLL4         | 15 |
| cg27016494 | DLX5         | 7  |
| cg00204249 | DNAH17       | 17 |
| cg09764984 | DNASE1       | 16 |
| cg15503081 | DNASE2       | 19 |
| cg00050692 | DNMT3A;DN    | 2  |
| cg03752935 | DOCK1        | 10 |
| cg14939821 | DOCK1;FAM:   | 10 |
| cg11394600 | DOCK4        | 7  |
| cg06870470 | DOCK6        | 19 |
| cg14293102 | DOT1L        | 19 |
| cg06776201 | DPF3         | 14 |
| cg26187031 | DPYSL2       | 8  |
| cg17759095 | DST          | 6  |
| cg07946977 | DUSP10;DUS   | 1  |
| cg27449114 | DUSP28       | 2  |
| cg02927679 | DUSP5        | 10 |
| cg03290131 | DUSP5        | 10 |
| cg10080966 | DUSP5        | 10 |
| cg01171786 | DYSF;DYSF;D  | 2  |
| cg12245706 | DYSF;DYSF;D  | 2  |
| cg14196395 | DYSF;DYSF;D  | 2  |
| cg02930866 | EAF1         | 3  |
| cg00210856 | EBF1         | 5  |
| cg11898646 | EBF1         | 5  |
| cg05487589 | EBF2         | 8  |
| cg03497907 | EBF3         | 10 |
| cg04582254 | EBF3         | 10 |
| cg07194839 | EBF3         | 10 |
| cg15491701 | EBF3         | 10 |
| cg23250262 | EBF3         | 10 |
| cg13562122 | ECE1;ECE1;Ei | 1  |
| cg21005416 | ECE1;ECE1;Ei | 1  |

|            |              |    |
|------------|--------------|----|
| cg02812891 | ECEL1P2      | 2  |
| cg13138089 | ECEL1P2      | 2  |
| cg16264526 | EDNRA;EDNF   | 4  |
| cg25978218 | EFHD2        | 1  |
| cg18919106 | EFR3A        | 8  |
| cg18454133 | EFS;EFS      | 14 |
| cg05150973 | EHD1         | 11 |
| cg11321083 | EHD1         | 11 |
| cg17344040 | EHD1         | 11 |
| cg10071442 | EHMT2;EHM    | 6  |
| cg24493649 | EHMT2;SLC4   | 6  |
| cg25506915 | EIF3G        | 19 |
| cg17887364 | EIF4EBP1     | 8  |
| cg08822118 | EIF4G1;EIF4G | 3  |
| cg12691679 | ELF1         | 13 |
| cg01440489 | ELF1;ELF1    | 13 |
| cg02632314 | ELF1;ELF1    | 13 |
| cg16986578 | ELF3;ELF3    | 1  |
| cg02076020 | ELF3;ELF3;EL | 1  |
| cg07897871 | ELF3;ELF3;EL | 1  |
| cg26328757 | ELF3;ELF3;EL | 1  |
| cg01291854 | ELK3         | 12 |
| cg01119452 | ELMO1        | 7  |
| cg08721338 | ELMO3        | 16 |
| cg25729687 | ELN;ELN;ELN  | 7  |
| cg17363943 | ELOVL6;ELO   | 4  |
| cg05731801 | EMP2         | 16 |
| cg14055970 | ENG;ENG      | 9  |
| cg11978634 | ENOX1;ENOX   | 13 |
| cg10332003 | ENPP6        | 4  |
| cg12492900 | EP400        | 12 |
| cg00097800 | EPAS1        | 2  |
| cg10507988 | EPAS1        | 2  |
| cg21211882 | EPB41L1;EPB  | 20 |
| cg23205365 | EPB41L5      | 2  |
| cg15141868 | EPDR1        | 7  |
| cg10835083 | EPHA4        | 2  |
| cg18156963 | EPHB2;EPHB   | 1  |
| cg13694876 | EPHB3        | 3  |
| cg22303758 | EPHX2        | 8  |
| cg25673598 | EPN2;EPN2;E  | 17 |
| cg01970336 | EPS15        | 1  |
| cg03507641 | ERC1;ERC1;E  | 12 |
| cg21578987 | ERG;ERG      | 21 |
| cg18413706 | ERG;ERG;ERC  | 21 |
| cg22709362 | ERL3         | 1  |

|            |              |    |
|------------|--------------|----|
| cg02650323 | ERLIN2;ERLIN | 8  |
| cg06193232 | ERN1         | 17 |
| cg04003327 | ESPNL;SCLY   | 2  |
| cg00944421 | ESRP2        | 16 |
| cg06390643 | ETV5         | 3  |
| cg11655490 | ETV6         | 12 |
| cg03056526 | EVX1         | 7  |
| cg04922154 | EVX1         | 7  |
| cg24892992 | EXT1         | 8  |
| cg18868540 | F2           | 11 |
| cg06856840 | FAH          | 15 |
| cg14273093 | FAM101A      | 12 |
| cg18672389 | FAM101A      | 12 |
| cg14170976 | FAM110A;FA   | 20 |
| cg06547285 | FAM113B      | 12 |
| cg25123566 | FAM113B;LO   | 12 |
| cg11970163 | FAM129A      | 1  |
| cg25182523 | FAM129A      | 1  |
| cg17320378 | FAM129C      | 19 |
| cg13782092 | FAM13A;FAM   | 4  |
| cg01403030 | FAM154A      | 9  |
| cg04860977 | FAM155A      | 13 |
| cg15683970 | FAM165B      | 21 |
| cg06551905 | FAM167A      | 8  |
| cg01245667 | FAM169B      | 15 |
| cg05368724 | FAM178B;FA   | 2  |
| cg26108017 | FAM178B;FA   | 2  |
| cg05557262 | FAM180A      | 7  |
| cg13436110 | FAM188B      | 7  |
| cg05949640 | FAM193A      | 4  |
| cg25790133 | FAM193A      | 4  |
| cg26981170 | FAM193A      | 4  |
| cg05883695 | FAM198A      | 3  |
| cg05006211 | FAM19A5      | 22 |
| cg08859215 | FAM20A       | 17 |
| cg19579080 | FAM20A       | 17 |
| cg05031931 | FAM20C       | 7  |
| cg08728302 | FAM20C       | 7  |
| cg11200568 | FAM20C       | 7  |
| cg19104757 | FAM20C       | 7  |
| cg24286414 | FAM20C       | 7  |
| cg25929664 | FAM20C       | 7  |
| cg27539806 | FAM38A       | 16 |
| cg15648792 | FAM38B       | 18 |
| cg00626702 | FAM53A       | 4  |
| cg19975346 | FAM53B       | 10 |



|            |              |    |
|------------|--------------|----|
| cg03935116 | FAM60A;FAM   | 12 |
| cg14741228 | FAM60A;FAM   | 12 |
| cg27050407 | FAM65B       | 6  |
| cg08893087 | FAM69A       | 1  |
| cg10624729 | FAM73A       | 1  |
| cg13487445 | FAM78A       | 9  |
| cg00831735 | FAM83A;FAM   | 8  |
| cg08256536 | FAM83A;FAM   | 8  |
| cg00846121 | FAM83E       | 19 |
| cg20283107 | FAM91A1      | 8  |
| cg13791971 | FANCC        | 9  |
| cg11829616 | FARP1        | 13 |
| cg19832331 | FARP1;FARP1  | 13 |
| cg06450397 | FAS;FAS;FAS; | 10 |
| cg26478401 | FAS;FAS;FAS; | 10 |
| cg01880399 | FAT1         | 4  |
| cg08070200 | FAT1         | 4  |
| cg07107113 | FBLIM1       | 1  |
| cg04956944 | FBLN7;FBLN7  | 2  |
| cg06068085 | FBN2         | 5  |
| cg00960772 | FBRSL1       | 12 |
| cg24621258 | FBRSL1       | 12 |
| cg25750363 | FBRSL1       | 12 |
| cg12897164 | FBXO32;FBXO  | 8  |
| cg26829322 | FBXO44;FBXO  | 1  |
| cg10523001 | FBXW11;FBX   | 5  |
| cg23985408 | FBXW11;FBX   | 5  |
| cg07050611 | FBXW8;FBXV   | 12 |
| cg15565057 | FCAMR;FCAM   | 1  |
| cg20806175 | FCER1G       | 1  |
| cg11263420 | FCGRT;FCGR1  | 19 |
| cg26549860 | FCHSD2       | 11 |
| cg09340639 | FCRL1;FCRL1  | 1  |
| cg00160981 | FCRLB        | 1  |
| cg20577477 | FDFT1        | 8  |
| cg16174681 | FER          | 5  |
| cg07682037 | FERMT3;FERM  | 11 |
| cg20684197 | FGF1;FGF1;F  | 5  |
| cg21619138 | FGF1;FGF1;F  | 5  |
| cg02406096 | FGF1;FGF1;F  | 5  |
| cg07620573 | FGF12        | 3  |
| cg03552039 | FGFR2;FGFR2  | 10 |
| cg10280007 | FGFR2;FGFR2  | 10 |
| cg12226006 | FGFR2;FGFR2  | 10 |
| cg13175830 | FGFR2;FGFR2  | 10 |
| cg13734061 | FGFR2;FGFR2  | 10 |

|            |              |    |
|------------|--------------|----|
| cg14834653 | FGFR2;FGFR2  | 10 |
| cg20277356 | FGFR2;FGFR2  | 10 |
| cg25294906 | FGFR2;FGFR2  | 10 |
| cg10314760 | FGFR2;FGFR2  | 10 |
| cg10362842 | FGFR2;FGFR2  | 10 |
| cg00730832 | FGFR2;FGFR2  | 10 |
| cg17997363 | FGFR2;FGFR2  | 10 |
| cg21311834 | FGFR3;FGFR3  | 4  |
| cg08521859 | FGFRL1;FGFF  | 4  |
| cg18699025 | FGFRL1;FGFF  | 4  |
| cg16398581 | FGGY;FGGY    | 1  |
| cg19746186 | FGGY;FGGY    | 1  |
| cg23167456 | FGR;FGR;FGF  | 1  |
| cg03055021 | FHAD1        | 1  |
| cg11815980 | FHIT;FHIT    | 3  |
| cg00004700 | FHL2;FHL2;FI | 2  |
| cg19652483 | FILIP1       | 6  |
| cg19226017 | FKBP5;LOC28  | 6  |
| cg07702311 | FLI1;FLI1    | 11 |
| cg02832512 | FLJ22536     | 6  |
| cg22800743 | FLJ22536     | 6  |
| cg08373323 | FLJ32810     | 11 |
| cg06991974 | FLJ42875;FLJ | 1  |
| cg07946633 | FLJ42875;PRI | 1  |
| cg19735250 | FMNL1        | 17 |
| cg20408776 | FMNL1        | 17 |
| cg21617353 | FMNL1        | 17 |
| cg00612751 | FMNL2        | 2  |
| cg06343233 | FMNL2        | 2  |
| cg11173609 | FMNL2        | 2  |
| cg15705810 | FMNL2        | 2  |
| cg21860045 | FMNL2        | 2  |
| cg26207245 | FMNL2        | 2  |
| cg02054252 | FMNL3;FMNL   | 12 |
| cg16034517 | FMO1         | 1  |
| cg12495731 | FN3K         | 17 |
| cg00000109 | FNDC3B;FND   | 3  |
| cg08495617 | FNDC3B;FND   | 3  |
| cg12202228 | FNDC3B;FND   | 3  |
| cg26334671 | FNDC3B;FND   | 3  |
| cg15141195 | FOXF2        | 6  |
| cg00661485 | FOXI1;FOXI1  | 5  |
| cg04261496 | FOXK1        | 7  |
| cg08645670 | FOXL1        | 16 |
| cg26958524 | FOXL1        | 16 |
| cg00584450 | FOXL1;FOXL1  | 16 |

|            |             |    |
|------------|-------------|----|
| cg24714561 | FOXN3       | 14 |
| cg14023350 | FOXN3;FOXN  | 14 |
| cg18359596 | FOXN3;FOXN  | 14 |
| cg01838853 | FOXN4       | 12 |
| cg19484481 | FOXO3;FOXC  | 6  |
| cg00201568 | FOXP1       | 3  |
| cg06175008 | FOXP1       | 3  |
| cg15963983 | FOXP1       | 3  |
| cg09611620 | FOXP1;FOXP  | 3  |
| cg17803993 | FOXP1;FOXP  | 3  |
| cg13492245 | FPGS;FPGS   | 9  |
| cg22152605 | FPR1        | 19 |
| cg13426351 | FREQ        | 9  |
| cg06127202 | FRK         | 6  |
| cg11377213 | FRMD4B      | 3  |
| cg05104995 | FRMPD2;FRM  | 10 |
| cg09188385 | FSCN1       | 7  |
| cg13087761 | FSCN1       | 7  |
| cg01512532 | FSCN2;FSCN2 | 17 |
| cg13672638 | FSD1L;FSD1L | 9  |
| cg19348484 | FURIN       | 15 |
| cg00480115 | FXYD3;FXYD3 | 19 |
| cg08130572 | FYN;FYN     | 6  |
| cg03009240 | FZR1        | 19 |
| cg10311132 | GABRB3;GAE  | 15 |
| cg00563858 | GALNT10     | 5  |
| cg13579752 | GALNT10     | 5  |
| cg15817769 | GALNT2      | 1  |
| cg16698674 | GALNT2      | 1  |
| cg26525772 | GALNT2      | 1  |
| cg05527856 | GALNTL4     | 11 |
| cg15094908 | GALNTL4     | 11 |
| cg08102611 | GAS7        | 17 |
| cg10237765 | GAS7;GAS7;C | 17 |
| cg18492943 | GCK         | 7  |
| cg02868790 | GCLC        | 6  |
| cg05989312 | GCOM1;GCO   | 15 |
| cg04365123 | GDF6        | 8  |
| cg13002506 | GDPD4       | 11 |
| cg01522592 | GDPD5       | 11 |
| cg16874185 | GDPD5       | 11 |
| cg03383006 | GFAP;GFAP   | 17 |
| cg09639715 | GFAP;GFAP   | 17 |
| cg06845268 | GFPT1       | 2  |
| cg10922232 | GGA3;GGA3   | 17 |
| cg08468689 | GHDC;GHDC;  | 17 |

|            |             |    |
|------------|-------------|----|
| cg13053608 | GHDC;GHDC;  | 17 |
| cg24413842 | GIMAP7      | 7  |
| cg07999953 | GJB3;GJB3   | 1  |
| cg01791238 | GLI2        | 2  |
| cg02774705 | GLI2        | 2  |
| cg10120778 | GLI3        | 7  |
| cg15078211 | GLI3        | 7  |
| cg14825413 | GLI4        | 8  |
| cg05040219 | GLIS1       | 1  |
| cg24741609 | GLIS1       | 1  |
| cg27311970 | GLIS1       | 1  |
| cg14325112 | GLIS3;GLIS3 | 9  |
| cg11650648 | GLP2R       | 17 |
| cg16677191 | GLRX;GLRX   | 5  |
| cg26736878 | GLT25D1     | 19 |
| cg18131582 | GLT25D2     | 1  |
| cg25605307 | GLT25D2     | 1  |
| cg03704673 | GLTPD2;GLTF | 17 |
| cg27642528 | GLUD1       | 10 |
| cg01465824 | GMDS        | 6  |
| cg01708377 | GMDS        | 6  |
| cg27360210 | GMFG        | 19 |
| cg20650545 | GMFG;GMFC   | 19 |
| cg07899459 | GMIP        | 19 |
| cg11967765 | GNA12       | 7  |
| cg25418001 | GNAI1       | 7  |
| cg21971807 | GNAS;GNAS;  | 20 |
| cg10309886 | GNASAS      | 20 |
| cg01919999 | GNB2L1      | 5  |
| cg17168836 | GNG12       | 1  |
| cg08134671 | GNG7        | 19 |
| cg15058852 | GNS         | 12 |
| cg17346500 | GOLIM4      | 3  |
| cg02357751 | GP1BB;SEPT5 | 22 |
| cg03263514 | GP1BB;SEPT5 | 22 |
| cg07359545 | GP1BB;SEPT5 | 22 |
| cg16210718 | GP1BB;SEPT5 | 22 |
| cg16627786 | GP1BB;SEPT5 | 22 |
| cg23787873 | GP1BB;SEPT5 | 22 |
| cg11772527 | GPC6        | 13 |
| cg25679431 | GPD1L       | 3  |
| cg13393408 | GPR107;GPR  | 9  |
| cg01056242 | GPR133      | 12 |
| cg25586410 | GPR155;GPR  | 2  |
| cg23078123 | GPR177      | 1  |
| cg12528056 | GPR44       | 11 |

|            |             |    |
|------------|-------------|----|
| cg05875421 | GPR68       | 14 |
| cg18421360 | GPR98;GPR9  | 5  |
| cg14471064 | GPSM1       | 9  |
| cg14040131 | GPSM1;GPSM  | 9  |
| cg14203108 | GPSM1;GPSM  | 9  |
| cg14271150 | GPSM1;GPSM  | 9  |
| cg14489965 | GPSM1;GPSM  | 9  |
| cg05241828 | GPT         | 8  |
| cg07658280 | GPT         | 8  |
| cg09957864 | GPT         | 8  |
| cg15983520 | GPT         | 8  |
| cg25600446 | GPT         | 8  |
| cg11241750 | GRAMD3      | 5  |
| cg26203383 | GRAP2       | 22 |
| cg19374752 | GRASP       | 12 |
| cg18047172 | GRB10;GRB1  | 7  |
| cg14605150 | GREM1       | 15 |
| cg13651876 | GRHPR       | 9  |
| cg24030173 | GRIN2D      | 19 |
| cg00522048 | GRK5        | 10 |
| cg10399824 | GRK5        | 10 |
| cg18001722 | GRK5        | 10 |
| cg23537932 | GRK5        | 10 |
| cg26759179 | GRK5        | 10 |
| cg21032008 | GRM7;GRM7   | 3  |
| cg08305799 | GSR         | 8  |
| cg27343684 | GSTA3       | 6  |
| cg10248878 | GSX2        | 4  |
| cg16335858 | GYLTL1B     | 11 |
| cg06745001 | GYS1;GYS1;G | 19 |
| cg03875678 | GZMB        | 14 |
| cg16356013 | H2AFY;H2AF  | 5  |
| cg04566694 | H6PD        | 1  |
| cg01045835 | HAPLN1      | 5  |
| cg25325949 | HAPLN1      | 5  |
| cg15371617 | HAVCR2;HAV  | 5  |
| cg17484237 | HAVCR2;HAV  | 5  |
| cg26306638 | HBEGF       | 5  |
| cg04938738 | HCCA2       | 11 |
| cg13376953 | HCCA2       | 11 |
| cg25050723 | HCCA2;CTSD  | 11 |
| cg05615856 | HCG27       | 6  |
| cg13337307 | HCRT        | 17 |
| cg05446471 | HDAC11;HDAC | 3  |
| cg06568490 | HDAC11;HDAC | 3  |
| cg03475776 | HDAC4       | 2  |

|            |             |    |
|------------|-------------|----|
| cg04869380 | HDAC4       | 2  |
| cg06855182 | HDAC4       | 2  |
| cg15933840 | HDAC4       | 2  |
| cg00332048 | HDAC9;HDAC  | 7  |
| cg23280720 | HECA        | 6  |
| cg01213645 | HECW1       | 7  |
| cg09907068 | HECW2       | 2  |
| cg11029367 | HEG1        | 3  |
| cg10839322 | HERC2       | 15 |
| cg24495350 | HEXA        | 15 |
| cg15567428 | HGF;HGF;HG  | 7  |
| cg01123449 | HHIPL1      | 14 |
| cg10054398 | HIVEP3;HIVE | 1  |
| cg17892259 | HIVEP3;HIVE | 1  |
| cg24254842 | HIVEP3;HIVE | 1  |
| cg00542261 | HK1;HK1;HK: | 10 |
| cg05595692 | HK2         | 2  |
| cg20520115 | HK2         | 2  |
| cg09869729 | HK3         | 5  |
| cg16742075 | HLA-A       | 6  |
| cg12365667 | HLA-DPB1    | 6  |
| cg09515921 | HLX         | 1  |
| cg18645081 | HLX         | 1  |
| cg14531576 | HMCN1;MIR:  | 1  |
| cg02423080 | HMGXB3      | 5  |
| cg02753354 | HMHA1       | 19 |
| cg09560590 | HMHB1       | 5  |
| cg04225775 | HMHB1;HMF   | 5  |
| cg26983544 | HOMER1      | 5  |
| cg11328436 | HOTAIR      | 12 |
| cg24895871 | HOTAIR      | 12 |
| cg12147489 | HOXA11AS    | 7  |
| cg20994254 | HOXA11AS    | 7  |
| cg07094847 | HOXA3;HOXA  | 7  |
| cg24389585 | HOXA5       | 7  |
| cg05349837 | HOXC4       | 12 |
| cg10366797 | HOXC4       | 12 |
| cg26201952 | HOXC4;HOXC  | 12 |
| cg05987823 | HOXC4;HOXC  | 12 |
| cg21431832 | HPS4;HPS4   | 22 |
| cg11416620 | HS6ST1      | 2  |
| cg15854333 | HSD17B8;SLC | 6  |
| cg22896793 | HSPA12B     | 20 |
| cg21945949 | HSPC159     | 2  |
| cg00023024 | HTR1D       | 1  |
| cg08273233 | HTR1E       | 6  |

|            |               |    |
|------------|---------------|----|
| cg00701951 | HTRA1         | 10 |
| cg02299946 | HTRA1         | 10 |
| cg11157691 | HTRA1         | 10 |
| cg15719652 | HTRA1         | 10 |
| cg23791011 | HTRA1         | 10 |
| cg21121843 | HTT           | 4  |
| cg11173579 | HUNK          | 21 |
| cg15391590 | ICK;ICK       | 6  |
| cg07463059 | IFI16;IFI16   | 1  |
| cg20597486 | IFI16;IFI16   | 1  |
| cg24979161 | IFI27L1;IFI27 | 14 |
| cg17980508 | IFI44L        | 1  |
| cg08173915 | IFNGR2        | 21 |
| cg19724567 | IFRD1         | 7  |
| cg05526364 | IFT122;IFT12  | 3  |
| cg03163545 | IFT140;TMEM   | 16 |
| cg26579713 | IGDCC4        | 15 |
| cg05075416 | IGF1R         | 15 |
| cg06671623 | IGF1R         | 15 |
| cg12402183 | IGF1R         | 15 |
| cg20388729 | IGF1R         | 15 |
| cg26577252 | IGF1R         | 15 |
| cg02425416 | IGF2AS;INS-II | 11 |
| cg05323345 | IGF2AS;INS-II | 11 |
| cg05777976 | IGF2AS;INS-II | 11 |
| cg19131227 | IGF2AS;INS-II | 11 |
| cg21025494 | IGF2BP3       | 7  |
| cg25754852 | IGF2R         | 6  |
| cg17980404 | IGFBP4        | 17 |
| cg10923036 | IGFBP7        | 4  |
| cg15096505 | IL10          | 1  |
| cg09577367 | IL12RB1;IL12  | 19 |
| cg25580782 | IL15RA;IL15R  | 10 |
| cg27292389 | IL15RA;IL15R  | 10 |
| cg05042034 | IL16          | 15 |
| cg16324121 | IL17RE;IL17R  | 3  |
| cg24394667 | IL1RL2        | 2  |
| cg25065535 | IL2           | 4  |
| cg02656594 | IL21R         | 16 |
| cg05814654 | IL21R;IL21R   | 16 |
| cg23507945 | IL22RA2;IL22  | 6  |
| cg07363330 | IL31RA        | 5  |
| cg05934682 | IL4I1;IL4I1   | 19 |
| cg16649560 | IL4R;IL4R     | 16 |
| cg04312209 | IL7R          | 5  |
| cg05893902 | IMPG2         | 3  |

|            |               |    |
|------------|---------------|----|
| cg26122413 | INF2;INF2     | 14 |
| cg23998240 | INF2;INF2;IN  | 14 |
| cg10773526 | INPP4B;INPP   | 4  |
| cg03438101 | INPP5A        | 10 |
| cg12449716 | INPP5A        | 10 |
| cg19649172 | INPP5A        | 10 |
| cg21140843 | INPP5K;INPP   | 17 |
| cg04057455 | INS-IGF2;IGF  | 11 |
| cg02742555 | INSC;INSC     | 11 |
| cg06049367 | INSC;INSC     | 11 |
| cg09779027 | INSR;INSR     | 19 |
| cg08129092 | INTS3         | 1  |
| cg22677858 | IPO9          | 1  |
| cg14255700 | IPPK          | 9  |
| cg18459152 | IQGAP2        | 5  |
| cg24380053 | IQSEC1        | 3  |
| cg24488317 | ISM1          | 20 |
| cg23721083 | ITGA11        | 15 |
| cg02225720 | ITGAE         | 17 |
| cg10753610 | ITGB3         | 17 |
| cg00871980 | ITGB5         | 3  |
| cg26689077 | ITGB7         | 12 |
| cg11838152 | ITGBL1        | 13 |
| cg08972954 | ITK           | 5  |
| cg18994033 | ITM2C;ITM2C   | 2  |
| cg22999830 | ITPK1;ITPK1;I | 14 |
| cg16636756 | ITPRIP        | 10 |
| cg19640166 | ITPRIP        | 10 |
| cg22888181 | ITPRIP        | 10 |
| cg24199006 | ITPRIP        | 10 |
| cg25552843 | ITPRIP        | 10 |
| cg05139187 | ITSN2;ITSN2;  | 2  |
| cg05796838 | JAK3          | 19 |
| cg06493612 | JARID2        | 6  |
| cg13623749 | JARID2        | 6  |
| cg14009473 | JARID2        | 6  |
| cg22982811 | JAZF1         | 7  |
| cg01675238 | JMJD7-PLA2C   | 15 |
| cg10464130 | KALRN;KALRI   | 3  |
| cg12024811 | KALRN;KALRI   | 3  |
| cg14688451 | KALRN;KALRI   | 3  |
| cg25250013 | KANK2;KANK    | 19 |
| cg20916427 | KATNAL2       | 18 |
| cg04063166 | KCNA4         | 11 |
| cg13377102 | KCNAB3        | 17 |
| cg21017569 | KCNAB3        | 17 |



|            |              |    |
|------------|--------------|----|
| cg05591210 | KCNE3        | 11 |
| cg00948250 | KCNJ10       | 1  |
| cg25508319 | KCNJ5        | 11 |
| cg21388745 | KCNK5        | 6  |
| cg07029975 | KCNMA1;KCN   | 10 |
| cg12614113 | KCNMA1;KCN   | 10 |
| cg22646937 | KCNMB1;KCN   | 5  |
| cg13396821 | KCNN3;KCNN   | 1  |
| cg26504422 | KCNN4        | 19 |
| cg07824422 | KCNQ1;KCNC   | 11 |
| cg08376310 | KCNQ1;KCNC   | 11 |
| cg13880539 | KCNQ1;KCNC   | 11 |
| cg16083838 | KCNQ1DN      | 11 |
| cg05203217 | KCNS1        | 20 |
| cg24193140 | KCTD16       | 5  |
| cg09185884 | KCTD2        | 17 |
| cg00268476 | KCTD5        | 16 |
| cg01640635 | KDEL3;KDEI   | 22 |
| cg09175485 | KDM2A;KDM    | 11 |
| cg16062733 | KDM2B;KDM    | 12 |
| cg10821320 | KDM4B        | 19 |
| cg17416338 | KDM4B        | 19 |
| cg24471894 | KIAA0020     | 9  |
| cg03004860 | KIAA0182;KI/ | 16 |
| cg26657404 | KIAA0182;KI/ | 16 |
| cg22455529 | KIAA0195     | 17 |
| cg03358636 | KIAA0226     | 3  |
| cg03505866 | KIAA0247     | 14 |
| cg27498545 | KIAA0802     | 18 |
| cg16328023 | KIAA0895;KI/ | 7  |
| cg17226446 | KIAA0922;KI/ | 4  |
| cg24630957 | KIAA1033     | 12 |
| cg16689761 | KIAA1147     | 7  |
| cg12380772 | KIAA1161     | 9  |
| cg17239876 | KIAA1274     | 10 |
| cg24775327 | KIAA1274     | 10 |
| cg24812143 | KIAA1274     | 10 |
| cg08883078 | KIAA1310;KI/ | 2  |
| cg21282282 | KIAA1324     | 1  |
| cg19603836 | KIAA1462     | 10 |
| cg04892182 | KIAA1522     | 1  |
| cg12478578 | KIAA1522     | 1  |
| cg16007395 | KIAA1522     | 1  |
| cg00731886 | KIAA1530     | 4  |
| cg00395625 | KIAA1549;KI/ | 7  |
| cg09510085 | KIAA1609     | 16 |

|            |               |    |
|------------|---------------|----|
| cg00010853 | KIAA1949;KI/  | 6  |
| cg00278359 | KIAA1949;KI/  | 6  |
| cg01413582 | KIAA1949;KI/  | 6  |
| cg03052182 | KIAA1949;KI/  | 6  |
| cg03953626 | KIAA1949;KI/  | 6  |
| cg08420066 | KIAA1949;KI/  | 6  |
| cg08887400 | KIAA1949;KI/  | 6  |
| cg11554650 | KIAA1949;KI/  | 6  |
| cg12036303 | KIAA1949;KI/  | 6  |
| cg12105190 | KIAA1949;KI/  | 6  |
| cg12247101 | KIAA1949;KI/  | 6  |
| cg15768443 | KIAA1949;KI/  | 6  |
| cg18427856 | KIAA1949;KI/  | 6  |
| cg18586886 | KIAA1949;KI/  | 6  |
| cg20690667 | KIAA1949;KI/  | 6  |
| cg24967096 | KIAA1949;KI/  | 6  |
| cg25659902 | KIAA1949;KI/  | 6  |
| cg11802797 | KIF1B         | 1  |
| cg23186534 | KIF5A         | 12 |
| cg00917156 | KIFC3;KIFC3;l | 16 |
| cg22066894 | KIRREL3;KIRF  | 11 |
| cg05647197 | KLF11         | 2  |
| cg00540067 | KLF15         | 3  |
| cg06724409 | KLF6;KLF6;KL  | 10 |
| cg07116163 | KLHL23        | 2  |
| cg03445244 | KLHL29        | 2  |
| cg17952075 | KLHL29        | 2  |
| cg27297315 | KLHL29        | 2  |
| cg09606470 | KLHL6         | 3  |
| cg20425130 | KLHL6         | 3  |
| cg15241779 | KLRD1;KLRD1   | 12 |
| cg01940139 | KLRD1;KLRD1   | 12 |
| cg21474838 | KLRD1;KLRD1   | 12 |
| cg15368872 | KLRK1         | 12 |
| cg04880751 | KMO           | 1  |
| cg11150901 | KMO           | 1  |
| cg21336116 | KRT23;KRT23   | 17 |
| cg07925587 | KRT80;KRT80   | 12 |
| cg11051139 | KRT80;KRT80   | 12 |
| cg05762338 | KRTAP1-5      | 17 |
| cg23878404 | KRTAP1-5      | 17 |
| cg07168232 | LAMB3;LAMI    | 1  |
| cg12689670 | LAMC1         | 1  |
| cg17418085 | LAPTM5        | 1  |
| cg02639667 | LARP1         | 5  |
| cg03519907 | LARP1         | 5  |

|            |              |    |
|------------|--------------|----|
| cg13689073 | LARP1        | 5  |
| cg16645907 | LARP1        | 5  |
| cg23613317 | LARP1        | 5  |
| cg05380759 | LARS2        | 3  |
| cg27053177 | LASS6        | 2  |
| cg18793512 | LBH          | 2  |
| cg10991454 | LCLAT1;LCLA  | 2  |
| cg23469878 | LCN6         | 9  |
| cg09672233 | LCP2;LCP2    | 5  |
| cg08262002 | LDB2;LDB2    | 4  |
| cg15108490 | LDLRAD3      | 11 |
| cg12565679 | LECT2        | 5  |
| cg15466952 | LEPR;LEPR;LE | 1  |
| cg24387542 | LGALS9B      | 17 |
| cg08824221 | LGR4         | 11 |
| cg23586835 | LGR4         | 11 |
| cg11683364 | LGR6;LGR6;L  | 1  |
| cg16326367 | LHFPL2       | 5  |
| cg26658897 | LHFPL2       | 5  |
| cg04949429 | LHPP;LHPP    | 10 |
| cg17995557 | LHPP;LHPP    | 10 |
| cg18593374 | LHPP;LHPP    | 10 |
| cg26284388 | LHPP;LHPP    | 10 |
| cg14305801 | LHX2         | 9  |
| cg14496753 | LHX6;LHX6    | 9  |
| cg25384595 | LILRA1;LILRA | 19 |
| cg05365532 | LILRB1       | 19 |
| cg01578293 | LIMCH1;LIMC  | 4  |
| cg23825522 | LIMD1        | 3  |
| cg21869609 | LINGO3       | 19 |
| cg09797463 | LIPA;LIPA    | 10 |
| cg08972916 | LLGL2;LLGL2; | 17 |
| cg09091185 | LMF1         | 16 |
| cg27182012 | LMNA;LMNA    | 1  |
| cg08586426 | LMO2         | 11 |
| cg04757411 | LMO7         | 13 |
| cg26400954 | LMO7         | 13 |
| cg14325930 | LMX1B        | 9  |
| cg18560915 | LNX1         | 4  |
| cg01624637 | LOC1001296   | 16 |
| cg06908618 | LOC1001296   | 16 |
| cg02694925 | LOC1001305   | 18 |
| cg11372934 | LOC1001308   | 4  |
| cg04859117 | LOC1001335   | 11 |
| cg09248429 | LOC1001335   | 11 |
| cg04517258 | LOC1001336   | 8  |

|            |              |    |
|------------|--------------|----|
| cg00526835 | LOC1001889   | 10 |
| cg20874785 | LOC1001895   | 2  |
| cg13356253 | LOC1003026   | 2  |
| cg00735454 | LOC121838    | 13 |
| cg03826194 | LOC121838    | 13 |
| cg27053629 | LOC145474    | 14 |
| cg05429448 | LOC152225    | 3  |
| cg12963656 | LOC152225    | 3  |
| cg15129183 | LOC257358    | 5  |
| cg07580867 | LOC283050;L  | 10 |
| cg17028595 | LOC283050;L  | 10 |
| cg15400629 | LOC285548    | 4  |
| cg24288715 | LOC285796    | 6  |
| cg16415646 | LOC285954;L  | 7  |
| cg02536995 | LOC553137    | 6  |
| cg00842231 | LOC55908;D   | 19 |
| cg04946709 | LOC644649    | 16 |
| cg23590187 | LOC646762    | 7  |
| cg16314851 | LOC723809    | 7  |
| cg09048205 | LOC728613    | 5  |
| cg20414364 | LOC728613    | 5  |
| cg06768079 | LOXL2        | 8  |
| cg00902153 | LPP;LPP;LPP  | 3  |
| cg08326019 | LPPR2;LPPR2  | 19 |
| cg22486630 | LPPR2;LPPR2  | 19 |
| cg02044895 | LPXN;LPXN;L  | 11 |
| cg20294319 | LRCH1;LRCH:  | 13 |
| cg11198596 | LRIG1        | 3  |
| cg26053346 | LRIG1        | 3  |
| cg22459236 | LRIG3;LRIG3  | 12 |
| cg03678566 | LRP5         | 11 |
| cg13738327 | LRP5         | 11 |
| cg16409259 | LRP5         | 11 |
| cg25781963 | LRP5         | 11 |
| cg04483460 | LRP8;LRP8;LF | 1  |
| cg11950754 | LRP8;LRP8;LF | 1  |
| cg01239922 | LRRC14B      | 5  |
| cg26692873 | LRRC16A      | 6  |
| cg16875182 | LRRC2;TDGF:  | 3  |
| cg05076755 | LRRC32;LRRC  | 11 |
| cg03153397 | LRRC48;LRRC  | 17 |
| cg09818397 | LRRC8B;LRRC  | 1  |
| cg04550950 | LRRC8D;LRRC  | 1  |
| cg15819128 | LRRFIP1;LRRF | 2  |
| cg07165120 | LRRK1        | 15 |
| cg12283393 | LSP1         | 11 |

|            |             |    |
|------------|-------------|----|
| cg25980489 | LTBP2       | 14 |
| cg27317046 | LTBP2       | 14 |
| cg23272978 | LTBP3;LTBP3 | 11 |
| cg22706992 | LVRN        | 5  |
| cg03928874 | LY86        | 6  |
| cg18865207 | LY9;LY9     | 1  |
| cg13213009 | LY96        | 8  |
| cg08806632 | LYL1        | 19 |
| cg08090164 | LYNX1;LYNX1 | 8  |
| cg11812233 | LYPD1;LYPD1 | 2  |
| cg02357637 | LYSMD4      | 15 |
| cg22367631 | MACF1       | 1  |
| cg26864766 | MACF1;MAC   | 1  |
| cg04683210 | MACROD1     | 11 |
| cg05985070 | MAD1L1;MA   | 7  |
| cg06624731 | MAD1L1;MA   | 7  |
| cg10534659 | MAD1L1;MA   | 7  |
| cg13798585 | MAD1L1;MA   | 7  |
| cg16222367 | MAD1L1;MA   | 7  |
| cg17103856 | MAD1L1;MA   | 7  |
| cg21728101 | MAD1L1;MA   | 7  |
| cg22963979 | MAD1L1;MA   | 7  |
| cg27109748 | MAD1L1;MA   | 7  |
| cg01403010 | MAFF;MAFF;  | 22 |
| cg14649449 | MAMDC2      | 9  |
| cg15521790 | MAML2       | 11 |
| cg03597159 | MAML3       | 4  |
| cg23206160 | MAML3       | 4  |
| cg24661274 | MAP1B       | 5  |
| cg14573876 | MAP2K2      | 19 |
| cg15076869 | MAP2K2      | 19 |
| cg04798016 | MAP3K11     | 11 |
| cg00146864 | MAP3K14     | 17 |
| cg07474842 | MAP3K5      | 6  |
| cg21778987 | MAP3K5      | 6  |
| cg15498306 | MARCH1;MA   | 4  |
| cg14622443 | MARCH10     | 17 |
| cg13963033 | MARCH3      | 5  |
| cg18640536 | MARCH3      | 5  |
| cg18322693 | MARCH4      | 2  |
| cg09034795 | MARK2;MAR   | 11 |
| cg18140824 | MASP1;MASI  | 3  |
| cg17462107 | MAST4;MAS   | 5  |
| cg24531825 | MATN1;MAT   | 1  |
| cg12429065 | MB          | 22 |
| cg06155414 | MBNL2;MBN   | 13 |

|            |             |    |
|------------|-------------|----|
| cg16762684 | MBP;MBP     | 18 |
| cg24446429 | MBP;MBP     | 18 |
| cg24853975 | MCC         | 5  |
| cg06062378 | MCC;MCC     | 5  |
| cg08213909 | MCC;MCC     | 5  |
| cg21609154 | MCF2L       | 13 |
| cg11521563 | MCF2L;MCF2  | 13 |
| cg06778183 | MCTP1;MCTI  | 5  |
| cg10371155 | MED1        | 17 |
| cg27657537 | MED15;MED   | 22 |
| cg05689413 | MED20       | 6  |
| cg15412772 | MED24;MED   | 17 |
| cg03301498 | MED29       | 19 |
| cg05554494 | MEFV        | 16 |
| cg26846864 | MEFV        | 16 |
| cg26450275 | MEGF10      | 5  |
| cg06511312 | MEGF6       | 1  |
| cg27450668 | MEGF6       | 1  |
| cg26585007 | MERTK       | 2  |
| cg02490034 | MEST        | 7  |
| cg13831540 | MESTIT1;ME  | 7  |
| cg15224459 | METRNL      | 17 |
| cg12695612 | MFAP2;MFAI  | 1  |
| cg17744878 | MFAP2;MFAI  | 1  |
| cg21304454 | MFAP2;MFAI  | 1  |
| cg03784611 | MFI2;MFI2   | 3  |
| cg16924045 | MFSD6       | 2  |
| cg07086226 | MFSD7       | 4  |
| cg00514575 | MGAT1;MGA   | 5  |
| cg01149192 | MGAT1;MGA   | 5  |
| cg04212021 | MGAT1;MGA   | 5  |
| cg05514299 | MGAT5B;MG   | 17 |
| cg09277376 | MGC12982    | 1  |
| cg10435609 | MGC27382    | 1  |
| cg11842367 | MGC27382    | 1  |
| cg24113496 | MGC29506    | 5  |
| cg16027775 | MGLL;MGLL   | 3  |
| cg08883995 | MGMT        | 10 |
| cg13171643 | MGMT        | 10 |
| cg22575127 | MGMT        | 10 |
| cg25974017 | MGMT        | 10 |
| cg17456675 | MIB2;MIB2;M | 1  |
| cg03821121 | MICAL2      | 11 |
| cg20330086 | MINK1;MINK  | 17 |
| cg22492271 | MIR1200;ELN | 7  |
| cg07018107 | MIR1208     | 8  |

|            |             |    |
|------------|-------------|----|
| cg00699693 | MIR140;WW   | 16 |
| cg07281938 | MIR140;WW   | 16 |
| cg02515217 | MIR21       | 17 |
| cg15759721 | MIR21       | 17 |
| cg18697991 | MIR548A2    | 3  |
| cg26664528 | MIR548H4;N  | 15 |
| cg23036340 | MIR548H4;TI | 15 |
| cg20587874 | MIR548N     | 2  |
| cg18156845 | MIR744;MAF  | 17 |
| cg03677952 | MLC1;MLC1   | 22 |
| cg07746514 | MLEC        | 12 |
| cg22501243 | MLXIP       | 12 |
| cg22729539 | MLXIP       | 12 |
| cg03509949 | MMP19       | 12 |
| cg17865265 | MMP19       | 12 |
| cg14589810 | MMP28       | 17 |
| cg00187327 | MN1         | 22 |
| cg21876918 | MOBKL2A     | 19 |
| cg24938761 | MOBKL2A     | 19 |
| cg16600733 | MORN1       | 1  |
| cg18936620 | MPL         | 1  |
| cg20120371 | MPP2        | 17 |
| cg17327331 | MPP5        | 14 |
| cg16527477 | MPP7        | 10 |
| cg14599440 | MPPE1       | 18 |
| cg02543159 | MPPED1      | 22 |
| cg23924737 | MRPS23      | 17 |
| cg04955683 | MRPS6       | 21 |
| cg02556430 | MRPS6;SLC5, | 21 |
| cg00510149 | MRVI1;MRVI  | 11 |
| cg06746274 | MS4A13;MS4  | 11 |
| cg00673646 | MS4A6A;MS4  | 11 |
| cg22762189 | MSGN1       | 2  |
| cg22149471 | MSI2        | 17 |
| cg07159758 | MSI2;MSI2   | 17 |
| cg13654836 | MSI2;MSI2   | 17 |
| cg16773768 | MSRA;MSRA   | 8  |
| cg00791074 | MTHFD1L     | 6  |
| cg18920088 | MTHFD1L     | 6  |
| cg02285003 | MTMR12      | 5  |
| cg24683185 | MTMR15      | 15 |
| cg07122170 | MTOR;ANGP   | 1  |
| cg19075081 | MTSS1L      | 16 |
| cg05656374 | MX2         | 21 |
| cg15281283 | MX2         | 21 |
| cg25368647 | MXD3;MXD3   | 5  |

|            |              |    |
|------------|--------------|----|
| cg04863197 | MYADML2      | 17 |
| cg14606858 | MYH16        | 7  |
| cg12235788 | MYLK;MYLK;   | 3  |
| cg19611163 | MYLK;MYLK;   | 3  |
| cg19007948 | MYLK4        | 6  |
| cg05713044 | MYO10        | 5  |
| cg24702069 | MYO16        | 13 |
| cg12416830 | MYO1E        | 15 |
| cg22132788 | MYO1G        | 7  |
| cg14100211 | MYO9A;SENF   | 15 |
| cg00806505 | MYOC         | 1  |
| cg01410279 | MYOC         | 1  |
| cg04852893 | MYOCD;MYC    | 17 |
| cg17800426 | MYOZ3;MYO    | 5  |
| cg11849327 | MYST4        | 10 |
| cg09716613 | N4BP2L1;N4   | 13 |
| cg00491064 | NAV2         | 11 |
| cg18009574 | NAV2;NAV2;   | 11 |
| cg22701534 | NAV2;NAV2;   | 11 |
| cg02959112 | NBL1;NBL1    | 1  |
| cg09936572 | NBPF1        | 1  |
| cg19865916 | NCDN;NCDN    | 1  |
| cg19758142 | NCEH1;NCEH   | 3  |
| cg01290856 | NCKAP5;NCK   | 2  |
| cg14416623 | NCKAP5;NCK   | 2  |
| cg12131620 | NCLN         | 19 |
| cg27015161 | NCOA1;NCO,   | 2  |
| cg08325898 | NCOA2        | 8  |
| cg10082088 | NCOR2;NCOI   | 12 |
| cg10996589 | NCOR2;NCOI   | 12 |
| cg11197258 | NCOR2;NCOI   | 12 |
| cg19341309 | NCOR2;NCOI   | 12 |
| cg20494738 | NCOR2;NCOI   | 12 |
| cg25954028 | NCOR2;NCOI   | 12 |
| cg27044649 | NCOR2;NCOI   | 12 |
| cg08610982 | NCR3;NCR3;   | 6  |
| cg10859327 | NCRNA00093   | 10 |
| cg02532853 | NCRNA00114   | 21 |
| cg06804705 | NCRNA00114   | 21 |
| cg17611512 | NCRNA00175   | 21 |
| cg08850169 | NDUFS2;NDU   | 1  |
| cg08580187 | NECAB2       | 16 |
| cg00525496 | NEDD9;NEDF   | 6  |
| cg13008174 | NEIL2;NEIL2; | 8  |
| cg11706790 | NEU4;NEU4    | 2  |
| cg16660312 | NEU4;NEU4    | 2  |



|            |             |    |
|------------|-------------|----|
| cg18095041 | NEU4;NEU4   | 2  |
| cg24429037 | NEU4;NEU4   | 2  |
| cg17280514 | NEU4;NEU4;  | 2  |
| cg01691332 | NEURL1B     | 5  |
| cg05109049 | NF1;EVI2B;N | 17 |
| cg21964564 | NFASC;NFAS  | 1  |
| cg04110750 | NFAT5;NFAT  | 16 |
| cg05718035 | NFATC1;NFA  | 18 |
| cg13731636 | NFATC1;NFA  | 18 |
| cg14715383 | NFATC1;NFA  | 18 |
| cg15517343 | NFATC1;NFA  | 18 |
| cg16536399 | NFATC1;NFA  | 18 |
| cg22532194 | NFATC1;NFA  | 18 |
| cg05264214 | NFATC1;NFA  | 18 |
| cg07342752 | NFATC1;NFA  | 18 |
| cg10357989 | NFATC1;NFA  | 18 |
| cg02506867 | NFATC3;NFA  | 16 |
| cg12510708 | NFE2L3      | 7  |
| cg13649253 | NFIX        | 19 |
| cg15783941 | NFIX        | 19 |
| cg22824635 | NFIX        | 19 |
| cg17048169 | NGEF;NGEF   | 2  |
| cg11087503 | NID2        | 14 |
| cg24575128 | NISCH       | 3  |
| cg01827248 | NKD1        | 16 |
| cg02015823 | NKD1        | 16 |
| cg01040654 | NKX2-5;NKX2 | 5  |
| cg11330740 | NKX2-5;NKX2 | 5  |
| cg07937271 | NKX3-2      | 4  |
| cg09624807 | NLRC5       | 16 |
| cg07121721 | NLRP1       | 17 |
| cg14928510 | NLRP7;NLRP  | 19 |
| cg19071544 | NOD1        | 7  |
| cg26274166 | NOSIP       | 19 |
| cg14494733 | NOTCH1      | 9  |
| cg26779406 | NOTCH1      | 9  |
| cg08828723 | NOTCH4      | 6  |
| cg05797854 | NOX3        | 6  |
| cg26047938 | NPAS2       | 2  |
| cg02094363 | NPAS3;NPAS  | 14 |
| cg13496915 | NPAS3;NPAS  | 14 |
| cg13019512 | NPM1;NPM1   | 5  |
| cg26647771 | NPR3        | 5  |
| cg27236629 | NR2F2;NR2F  | 15 |
| cg05265020 | NRN1        | 6  |
| cg01068601 | NRN1L       | 16 |

|            |              |    |
|------------|--------------|----|
| cg27270412 | NRP1;NRP1;f  | 10 |
| cg08623810 | NRXN2;NRXN   | 11 |
| cg21660452 | NRXN2;NRXN   | 11 |
| cg27379887 | NSFL1C;NSFL  | 20 |
| cg10037913 | NSMCE1       | 16 |
| cg02344784 | NT5DC3       | 12 |
| cg12620806 | NTF3;NTF3    | 12 |
| cg07114544 | NTN1         | 17 |
| cg15370309 | NTN1         | 17 |
| cg07508429 | NUDCD3       | 7  |
| cg14705010 | NUMA1        | 11 |
| cg25505880 | NXF1;NXF1    | 11 |
| cg08510234 | NXN          | 17 |
| cg13383734 | NXN          | 17 |
| cg14136893 | NXN          | 17 |
| cg22237425 | NXN          | 17 |
| cg25364619 | NXN          | 17 |
| cg19789466 | OAS1;OAS1;(  | 12 |
| cg12560128 | OAS2;OAS2;(  | 12 |
| cg27147785 | OAS2;OAS2;(  | 12 |
| cg05794117 | OBSCN;OBSC   | 1  |
| cg05521175 | OBSL1        | 2  |
| cg14037346 | ODF2         | 9  |
| cg11097249 | ODZ2         | 5  |
| cg09966895 | ODZ4         | 11 |
| cg03208902 | OR1F2P       | 16 |
| cg27191606 | OR8H2        | 11 |
| cg20886721 | OR8U8        | 11 |
| cg09641663 | OSBPL10      | 3  |
| cg26949612 | OSBPL6       | 2  |
| cg02026204 | OSM          | 22 |
| cg02172492 | OSR1         | 2  |
| cg12619940 | OSR1         | 2  |
| cg26701390 | OSR1         | 2  |
| cg27305303 | OTOF         | 2  |
| cg10465028 | OTUB1;OTUE   | 11 |
| cg04276301 | OTX1         | 2  |
| cg16595607 | OTX1         | 2  |
| cg04793268 | OVCH2        | 11 |
| cg13229961 | OVOL1        | 11 |
| cg20869369 | PABPC1L      | 20 |
| cg00665650 | PAIP2;PAIP2  | 5  |
| cg17263916 | PAIP2;PAIP2; | 5  |
| cg05259872 | PALLD;PALLC  | 4  |
| cg08947774 | PALLD;PALLC  | 4  |
| cg21204870 | PALM2;PALM   | 9  |

|            |             |    |
|------------|-------------|----|
| cg16805189 | PANX1       | 11 |
| cg24101009 | PANX1       | 11 |
| cg03319315 | PAOX;PAOX;  | 10 |
| cg18563886 | PAOX;PAOX;  | 10 |
| cg00744494 | PAPLN       | 14 |
| cg21894762 | PAPLN       | 14 |
| cg10447404 | PARD3       | 10 |
| cg04203587 | PARM1       | 4  |
| cg02346790 | PARP15      | 3  |
| cg20765408 | PARP4       | 13 |
| cg13518121 | PARVA       | 11 |
| cg16634971 | PARVA       | 11 |
| cg04134965 | PARVB;PARV  | 22 |
| cg20737028 | PATE3       | 11 |
| cg09752271 | PATE3;PATE3 | 11 |
| cg11163555 | PATZ1;PATZ1 | 22 |
| cg11194398 | PC;PC;PC    | 11 |
| cg06022884 | PCCB        | 3  |
| cg00160440 | PCDH10      | 4  |
| cg15901722 | PCDH24      | 5  |
| cg14369318 | PCDH7       | 4  |
| cg14205864 | PCID2;PCID2 | 13 |
| cg01966277 | PCLO        | 7  |
| cg14453145 | PDCD1       | 2  |
| cg19316405 | PDDC1       | 11 |
| cg05034374 | PDE11A;PDE1 | 2  |
| cg10706013 | PDE9A;PDE9  | 21 |
| cg03020863 | PDGFD;PDGF  | 11 |
| cg21363050 | PDGFRA      | 4  |
| cg10093934 | PDK1        | 2  |
| cg01463828 | PDLIM2;PDLI | 8  |
| cg20449614 | PDLIM2;PDLI | 8  |
| cg14906976 | PDXK        | 21 |
| cg18410110 | PDZD2       | 5  |
| cg02529095 | PDZD7       | 10 |
| cg13019092 | PDZK1       | 1  |
| cg07810156 | PDZK1IP1;PD | 1  |
| cg12584826 | PDZRN3      | 3  |
| cg13050115 | PDZRN3      | 3  |
| cg13521002 | PEBP4       | 8  |
| cg04397884 | PELI2       | 14 |
| cg25392325 | PEMT;PEMT;  | 17 |
| cg09327610 | PER3        | 1  |
| cg24524895 | PEX11A      | 15 |
| cg03124510 | PFKFB3      | 10 |
| cg05014727 | PFKFB3      | 10 |

|            |              |    |
|------------|--------------|----|
| cg08500510 | PFKFB3       | 10 |
| cg08994060 | PFKFB3       | 10 |
| cg26262157 | PFKFB3       | 10 |
| cg04026948 | PGCP         | 8  |
| cg04839673 | PGM1         | 1  |
| cg03891302 | PHACTR1      | 6  |
| cg08482167 | PHACTR2;PH   | 6  |
| cg16220788 | PHF21A;PHF   | 11 |
| cg13613439 | PHYHD1;PHY   | 9  |
| cg24200175 | PICALM;PICA  | 11 |
| cg21723559 | PIGT         | 20 |
| cg07805542 | PIK3CD       | 1  |
| cg17725019 | PIK3IP1;PIK3 | 22 |
| cg04610450 | PIK3R2       | 19 |
| cg11327029 | PIP4K2A      | 10 |
| cg19397801 | PIP4K2A      | 10 |
| cg04965671 | PISD         | 22 |
| cg01768814 | PITPNC1;PITF | 17 |
| cg13037550 | PITPNM2      | 12 |
| cg03594078 | PIWIL2;PIWII | 8  |
| cg12858593 | PIWIL2;PIWII | 8  |
| cg19949931 | PKD1;MIR12   | 16 |
| cg19584660 | PKD1;PKD1    | 16 |
| cg27227497 | PKD1;PKD1    | 16 |
| cg10731848 | PKD1L1       | 7  |
| cg07565018 | PKM2;PKM2;   | 15 |
| cg01243773 | PKNOX2       | 11 |
| cg09270285 | PKNOX2       | 11 |
| cg13168187 | PKP4;PKP4    | 2  |
| cg05048624 | PLA2G2D      | 1  |
| cg18981758 | PLA2G6;PLA2  | 22 |
| cg09920804 | PLAT;PLAT    | 8  |
| cg23120601 | PLCB2        | 15 |
| cg27638309 | PLCE1;PLCE1  | 10 |
| cg18623216 | PLCH1;PLCH1  | 3  |
| cg07598407 | PLEC1;PLEC1  | 8  |
| cg21535931 | PLEC1;PLEC1  | 8  |
| cg04872689 | PLEK;PLEK    | 2  |
| cg10812236 | PLEK;PLEK    | 2  |
| cg07132086 | PLEKHA2      | 8  |
| cg11131599 | PLEKHA6      | 1  |
| cg15306794 | PLEKHA7      | 11 |
| cg22309568 | PLEKHF1      | 19 |
| cg11802553 | PLEKHG3      | 14 |
| cg01767200 | PLEKHG4B     | 5  |
| cg00186909 | PLEKHG7      | 12 |

|            |              |    |
|------------|--------------|----|
| cg11524454 | PLEKHG7      | 12 |
| cg05939149 | PLEKHH2      | 2  |
| cg26232945 | PLEKHM3      | 2  |
| cg03631457 | PLXDC2       | 10 |
| cg12723985 | PLXDC2       | 10 |
| cg02736746 | PLXNA2       | 1  |
| cg24161018 | PLXNA4       | 7  |
| cg09837648 | PLXNB1;PLXN  | 3  |
| cg07078269 | PLXND1       | 3  |
| cg16850690 | PLXND1       | 3  |
| cg27353085 | PLXND1       | 3  |
| cg05355067 | PMEPA1;PMI   | 20 |
| cg07908223 | PMEPA1;PMI   | 20 |
| cg00587342 | PMM1         | 22 |
| cg23694811 | POGK         | 1  |
| cg05673882 | POLK         | 5  |
| cg04270402 | PON2;PON2    | 7  |
| cg18397073 | POU2F2       | 19 |
| cg17469359 | POU6F2;POL   | 7  |
| cg21286173 | PPAPDC1B     | 8  |
| cg10952234 | PPFIA4;PPFIA | 1  |
| cg24000087 | PPFIA4;PPFIA | 1  |
| cg19769080 | PPM1B        | 2  |
| cg08067969 | PPP1R13B     | 14 |
| cg02265810 | PPP2R2D;PPI  | 10 |
| cg20910008 | PPP3CC       | 8  |
| cg13845634 | PPY          | 17 |
| cg08369079 | PRDM1;PRDI   | 6  |
| cg00328729 | PRDM11       | 11 |
| cg13448468 | PRDM11       | 11 |
| cg00894041 | PRDM16;PRC   | 1  |
| cg01448098 | PRDM16;PRC   | 1  |
| cg04855369 | PRDM16;PRC   | 1  |
| cg05965745 | PRDM16;PRC   | 1  |
| cg06911744 | PRDM16;PRC   | 1  |
| cg09321238 | PRDM16;PRC   | 1  |
| cg11392550 | PRDM16;PRC   | 1  |
| cg11710123 | PRDM16;PRC   | 1  |
| cg15619820 | PRDM16;PRC   | 1  |
| cg17601209 | PRDM16;PRC   | 1  |
| cg19263228 | PRDM16;PRC   | 1  |
| cg20236995 | PRDM16;PRC   | 1  |
| cg22497969 | PRDM16;PRC   | 1  |
| cg22720392 | PRDM16;PRC   | 1  |
| cg25153629 | PRDM16;PRC   | 1  |
| cg26520908 | PRDM16;PRC   | 1  |

|            |              |    |
|------------|--------------|----|
| cg03311556 | PRDM8        | 4  |
| cg06440348 | PRDM8        | 4  |
| cg02732915 | PRDM8;PRDI   | 4  |
| cg05522011 | PRDM8;PRDI   | 4  |
| cg19752143 | PREPL;PREPL  | 2  |
| cg09844573 | PRIC285;PRIC | 20 |
| cg15262954 | PRIC285;PRIC | 20 |
| cg03190018 | PRKAG2;PRK   | 7  |
| cg17814717 | PRKAG2;PRK   | 7  |
| cg26284782 | PRKAG2;PRK   | 7  |
| cg27577993 | PRKAG2;PRK   | 7  |
| cg09397579 | PRKAG2;PRK   | 7  |
| cg03719152 | PRKAR1B;PRI  | 7  |
| cg06728793 | PRKAR1B;PRI  | 7  |
| cg07689396 | PRKAR1B;PRI  | 7  |
| cg16581738 | PRKAR1B;PRI  | 7  |
| cg10460643 | PRKCD;PRKC   | 3  |
| cg24545602 | PRKCE        | 2  |
| cg15505219 | PRKCH        | 14 |
| cg22128985 | PRKCZ;PRKCZ  | 1  |
| cg01456572 | PRM3         | 16 |
| cg03543319 | PROKR1       | 2  |
| cg20266593 | PRRT1        | 6  |
| cg26647566 | PRSS12       | 4  |
| cg20633213 | PRTFDC1      | 10 |
| cg09894683 | PSD3;PSD3    | 8  |
| cg11706729 | PSMB8;PSME   | 6  |
| cg02567488 | PSMB9;PSME   | 6  |
| cg14914552 | PTDSS1       | 8  |
| cg18369034 | PTGDR        | 14 |
| cg01091117 | PTGER4       | 5  |
| cg04041000 | PTH1R        | 3  |
| cg21578195 | PTK6         | 20 |
| cg25143652 | PTK6;PTK6    | 20 |
| cg20386404 | PTPN14       | 1  |
| cg27234747 | PTPN4        | 2  |
| cg26842815 | PTPN6;PTPN   | 12 |
| cg14468481 | PTPRN2;PTPI  | 7  |
| cg24842334 | PTPRN2;PTPI  | 7  |
| cg13896328 | PTPRU;PTPRI  | 1  |
| cg08216099 | PXDN         | 2  |
| cg23626387 | QSOX1;QSOX   | 1  |
| cg05324989 | QTRT1        | 19 |
| cg09962377 | RAB11FIP3    | 16 |
| cg05000339 | RAB11FIP4    | 17 |
| cg24174232 | RAB11FIP4    | 17 |

|            |              |    |
|------------|--------------|----|
| cg17960615 | RAB31        | 18 |
| cg03349407 | RAB3GAP2;A   | 1  |
| cg26881535 | RAB3GAP2;A   | 1  |
| cg03828193 | RAB40B       | 17 |
| cg02747950 | RAB8B        | 15 |
| cg10777887 | RAB8B        | 15 |
| cg15381475 | RAC1;RAC1    | 7  |
| cg08297686 | RAD51L1;RAI  | 14 |
| cg25603108 | RAD51L1;RAI  | 14 |
| cg03461781 | RAGE         | 14 |
| cg19147912 | RAI1         | 17 |
| cg19447962 | RAI1         | 17 |
| cg14083146 | RALGAPA2     | 20 |
| cg14586546 | RALGDS       | 9  |
| cg10846682 | RAMP1        | 2  |
| cg02909097 | RAP1GAP2;R   | 17 |
| cg09981407 | RAP1GAP2;R   | 17 |
| cg13784312 | RAPGEF1      | 9  |
| cg13655250 | RAPGEF1;RAI  | 9  |
| cg22900476 | RAPGEF4      | 2  |
| cg11094248 | RARA;RARA;I  | 17 |
| cg10592478 | RARG;RARG    | 12 |
| cg13937905 | RARG;RARG    | 12 |
| cg14986890 | RARRES1;RAI  | 3  |
| cg05187651 | RASA3        | 13 |
| cg10976218 | RASA3        | 13 |
| cg11288831 | RASA3        | 13 |
| cg11686792 | RASA3        | 13 |
| cg16046375 | RASA3        | 13 |
| cg24002183 | RASAL3       | 19 |
| cg15787807 | RASGRP2;RA   | 11 |
| cg17735563 | RASGRP3;RA   | 2  |
| cg01932734 | RASSF1;RASS  | 3  |
| cg12691994 | RASSF5;RASS  | 1  |
| cg10992219 | RB1CC1;RB1C  | 8  |
| cg08667600 | RBMS3;RBM    | 3  |
| cg22992279 | RBPJ;RBPJ;RE | 4  |
| cg09829263 | RCBTB2       | 13 |
| cg11093142 | RCBTB2       | 13 |
| cg03907174 | RCN3         | 19 |
| cg10823566 | RCSD1        | 1  |
| cg11937768 | REEP3        | 10 |
| cg02098619 | RERE;RERE    | 1  |
| cg19400316 | RERE;RERE    | 1  |
| cg13400249 | RERE;RERE;R  | 1  |
| cg20316440 | RERE;RERE;R  | 1  |

|            |             |    |
|------------|-------------|----|
| cg11184109 | RFT1        | 3  |
| cg00259834 | RFTN1       | 3  |
| cg04381957 | RFTN1       | 3  |
| cg25741259 | RFX2;RFX2   | 19 |
| cg05991009 | RFX8        | 2  |
| cg03462901 | RGMA;RGM/   | 15 |
| cg26905931 | RGMA;RGM/   | 15 |
| cg15611912 | RGS10       | 10 |
| cg13702185 | RGS12;RGS1: | 4  |
| cg18944752 | RGS12;RGS1: | 4  |
| cg24028809 | RGS17       | 6  |
| cg11993173 | RGS20;RGS2I | 8  |
| cg13604445 | RGS3;RGS3;R | 9  |
| cg05111779 | RGS6        | 14 |
| cg18515872 | RGS6        | 14 |
| cg21899942 | RGS6        | 14 |
| cg20333869 | RHEB        | 7  |
| cg07768107 | RHOH        | 4  |
| cg22107662 | RIMBP3      | 22 |
| cg08591048 | RIMBP3C;RIM | 22 |
| cg00009196 | RIN2        | 20 |
| cg01288337 | RIN3        | 14 |
| cg15789055 | RING1       | 6  |
| cg12903024 | RLBP1       | 15 |
| cg00452882 | RLTPR       | 16 |
| cg18294707 | RNASE2      | 14 |
| cg24851490 | RNASE2      | 14 |
| cg00502926 | RNASE7      | 14 |
| cg01449715 | RNASEH2B;R  | 13 |
| cg17918184 | RNF144A     | 2  |
| cg06788514 | RNF166      | 16 |
| cg17589449 | RNF185;RNF: | 22 |
| cg03163812 | RNF5P1      | 8  |
| cg19311055 | RNF5P1      | 8  |
| cg14044388 | ROR2        | 9  |
| cg08099431 | RORA        | 15 |
| cg12742645 | RPH3AL      | 17 |
| cg05181927 | RPS24;RPS24 | 10 |
| cg03849851 | RPS6KA2;RPS | 6  |
| cg23002590 | RPS6KA2;RPS | 6  |
| cg16361947 | RPSA;RPSA;S | 3  |
| cg01911440 | RPTOR;RPTO  | 17 |
| cg02864619 | RPTOR;RPTO  | 17 |
| cg12434898 | RPTOR;RPTO  | 17 |
| cg20462129 | RPTOR;RPTO  | 17 |
| cg24667756 | RPTOR;RPTO  | 17 |



|            |             |    |
|------------|-------------|----|
| cg01358966 | RRN3P2      | 16 |
| cg12132508 | RRP15       | 1  |
| cg24249648 | RSPH3       | 6  |
| cg07112562 | RSU1;RSU1   | 10 |
| cg18280126 | RTN4RL2     | 11 |
| cg02767634 | RUFY1;RUFY: | 5  |
| cg04194479 | RUNDC2C     | 16 |
| cg08254842 | RUNDC2C     | 16 |
| cg08443845 | RUNX1       | 21 |
| cg15091747 | RUNX1       | 21 |
| cg19836199 | RUNX1       | 21 |
| cg01519261 | RUNX1;RUN)  | 21 |
| cg04915566 | RUNX1;RUN)  | 21 |
| cg13030790 | RUNX1;RUN)  | 21 |
| cg04554131 | RUNX3       | 1  |
| cg02127980 | RXRA        | 9  |
| cg04875697 | RXRA        | 9  |
| cg13425135 | RXRA        | 9  |
| cg14236758 | RXRA        | 9  |
| cg14344989 | RXRA        | 9  |
| cg11284973 | RXRB        | 6  |
| cg03181524 | RYR1;RYR1   | 19 |
| cg14467840 | S100A13;S10 | 1  |
| cg10963218 | S100A13;S10 | 1  |
| cg15559456 | S100A13;S10 | 1  |
| cg20847746 | S100A13;S10 | 1  |
| cg01411912 | S100A4;S100 | 1  |
| cg13091627 | S100A4;S100 | 1  |
| cg21217846 | S100A5      | 1  |
| cg03514239 | S100A9      | 1  |
| cg11064537 | S100B       | 21 |
| cg04353438 | SAFB2       | 19 |
| cg10888242 | SAMD4A;SAM  | 14 |
| cg08986767 | SAMD9;SAM   | 7  |
| cg04554576 | SATB2       | 2  |
| cg06876053 | SBF2        | 11 |
| cg13075279 | SCARB1;SCAI | 12 |
| cg22775642 | SCARB1;SCAI | 12 |
| cg09268718 | SCARF1;SCAF | 17 |
| cg24708308 | SCARNA11;C  | 12 |
| cg02237755 | SCD         | 10 |
| cg16744911 | SCD         | 10 |
| cg12510724 | SCNN1A;SCN  | 12 |
| cg23245485 | SCNN1A;SCN  | 12 |
| cg26736232 | SCT         | 11 |
| cg12190613 | SDC2        | 8  |

|            |             |    |
|------------|-------------|----|
| cg16962683 | SDC2        | 8  |
| cg06968788 | SDC4P       | 22 |
| cg00295780 | SDCCAG8     | 1  |
| cg08262429 | SDCCAG8     | 1  |
| cg08102516 | SDK1        | 7  |
| cg16250868 | SDK1        | 7  |
| cg00711291 | SDK2        | 17 |
| cg04004830 | SDPR        | 2  |
| cg05149586 | SDSL        | 12 |
| cg15046304 | SEC14L1;SEC | 17 |
| cg20337028 | SEC14L1;SEC | 17 |
| cg16640599 | SEC24D      | 4  |
| cg25165932 | SELPLG      | 12 |
| cg13474090 | SEMA4D;SEN  | 9  |
| cg01477253 | SEMA4F      | 2  |
| cg17679604 | SEMA6A      | 5  |
| cg27157619 | SEMA7A;SEN  | 15 |
| cg05474605 | SEPP1;SEPP1 | 5  |
| cg00934987 | SEPT4;SEPT4 | 17 |
| cg03432618 | SEPT5       | 22 |
| cg12194864 | SEPT9;SEPT9 | 17 |
| cg06791979 | SEPT9;SEPT9 | 17 |
| cg12673019 | SERGEF      | 11 |
| cg18939081 | SERINC2     | 1  |
| cg01417313 | SERTAD4     | 1  |
| cg24180006 | SETD3;SETD3 | 14 |
| cg10663078 | SFRP2       | 4  |
| cg04582295 | SGCA;SGCA   | 17 |
| cg04905719 | SGK1        | 6  |
| cg09404376 | SGK1;SGK1   | 6  |
| cg02904344 | SGK1;SGK1;S | 6  |
| cg13799263 | SGMS1       | 10 |
| cg10362613 | SH2D4A      | 8  |
| cg18403548 | SH3BP2;SH3I | 4  |
| cg01854776 | SH3BP4      | 2  |
| cg09042791 | SH3BP4      | 2  |
| cg12559925 | SH3BP4      | 2  |
| cg24203758 | SH3D20      | 17 |
| cg06888746 | SH3PXD2A    | 10 |
| cg03868944 | SH3PXD2B    | 5  |
| cg16572224 | SH3PXD2B    | 5  |
| cg18135683 | SH3PXD2B    | 5  |
| cg19027424 | SH3PXD2B    | 5  |
| cg25693317 | SH3PXD2B    | 5  |
| cg16635948 | SH3RF3      | 2  |
| cg19024599 | SH3RF3      | 2  |

|            |              |    |
|------------|--------------|----|
| cg07248017 | SH3TC1       | 4  |
| cg09548638 | SH3TC2       | 5  |
| cg16312514 | SHANK2       | 11 |
| cg26645082 | SHANK2       | 11 |
| cg00954833 | SHFM1        | 7  |
| cg12639933 | SHMT2;SHM    | 12 |
| cg04461123 | SHROOM3      | 4  |
| cg00365692 | SIGLECP3     | 19 |
| cg21982437 | SIGLECP3     | 19 |
| cg00698204 | SIM2;SIM2    | 21 |
| cg01090834 | SIM2;SIM2    | 21 |
| cg02553516 | SIM2;SIM2    | 21 |
| cg02701080 | SIM2;SIM2    | 21 |
| cg07615087 | SIM2;SIM2    | 21 |
| cg10456990 | SIM2;SIM2    | 21 |
| cg10538440 | SIM2;SIM2    | 21 |
| cg15750546 | SIM2;SIM2    | 21 |
| cg19498960 | SIM2;SIM2    | 21 |
| cg22289831 | SIM2;SIM2    | 21 |
| cg22711869 | SIM2;SIM2    | 21 |
| cg27248980 | SIM2;SIM2    | 21 |
| cg11803771 | SIPA1;SIPA1  | 11 |
| cg04466898 | SIPA1;SIPA1; | 11 |
| cg15537788 | SIPA1L3      | 19 |
| cg04400145 | SIRPA        | 20 |
| cg02360367 | SKI          | 1  |
| cg04619852 | SKI          | 1  |
| cg05948763 | SKI          | 1  |
| cg12473697 | SKI          | 1  |
| cg17854510 | SKI          | 1  |
| cg24377150 | SKI          | 1  |
| cg13015485 | SKIV2L       | 6  |
| cg04275881 | SLAMF8       | 1  |
| cg06764092 | SLAMF8;SLAI  | 1  |
| cg07625783 | SLAMF8;SLAI  | 1  |
| cg21301505 | SLAMF8;SLAI  | 1  |
| cg19123916 | SLC10A4      | 4  |
| cg18464823 | SLC12A6;SLC  | 15 |
| cg19363889 | SLC14A1;SLC  | 18 |
| cg18130079 | SLC16A1;SLC  | 1  |
| cg11742202 | SLC17A5      | 6  |
| cg15520443 | SLC18A2      | 10 |
| cg08258650 | SLC1A2       | 11 |
| cg01823958 | SLC1A7       | 1  |
| cg13434757 | SLC22A1;SLC  | 6  |
| cg06048910 | SLC22A18;SL  | 11 |

|            |             |    |
|------------|-------------|----|
| cg18458509 | SLC22A18AS; | 11 |
| cg02081198 | SLC22A18AS; | 11 |
| cg07291601 | SLC22A18AS; | 11 |
| cg10943932 | SLC22A18AS; | 11 |
| cg24041239 | SLC22A18AS; | 11 |
| cg25548316 | SLC22A18AS; | 11 |
| cg05200313 | SLC24A4;SLC | 14 |
| cg11107966 | SLC24A4;SLC | 14 |
| cg19811934 | SLC24A4;SLC | 14 |
| cg23558213 | SLC25A17    | 22 |
| cg16713727 | SLC25A34    | 1  |
| cg07659624 | SLC25A37    | 8  |
| cg25561754 | SLC26A11;SL | 17 |
| cg17217665 | SLC29A1;SLC | 6  |
| cg07826642 | SLC29A1;SLC | 6  |
| cg02354828 | SLC29A3     | 10 |
| cg05345039 | SLC2A1      | 1  |
| cg25602242 | SLC2A5      | 1  |
| cg02339793 | SLC38A10;SL | 17 |
| cg07656922 | SLC38A10;SL | 17 |
| cg21461745 | SLC39A11;SL | 17 |
| cg25059165 | SLC39A7;HSE | 6  |
| cg04204452 | SLC43A2     | 17 |
| cg10586672 | SLC6A6;SLC6 | 3  |
| cg15155209 | SLC6A6;SLC6 | 3  |
| cg13763232 | SLC6A6;SLC6 | 3  |
| cg15454698 | SLC6A6;SLC6 | 3  |
| cg03158310 | SLC9A3R2;SL | 16 |
| cg13408795 | SLC9A9      | 3  |
| cg02107844 | SLCO3A1;SLC | 15 |
| cg22260869 | SLCO3A1;SLC | 15 |
| cg12043732 | SLCO4A1     | 20 |
| cg05906024 | SLIT3       | 5  |
| cg13008977 | SLIT3       | 5  |
| cg17229698 | SLIT3       | 5  |
| cg21953891 | SLIT3       | 5  |
| cg25984601 | SLIT3       | 5  |
| cg12966875 | SLPI        | 20 |
| cg25594736 | SMAD3       | 15 |
| cg00350432 | SMAD6;SMA   | 15 |
| cg19430553 | SMAD7       | 18 |
| cg10017293 | SMAGP;DAZ1  | 12 |
| cg08151828 | SMARCA4;SN  | 19 |
| cg02596233 | SMARCD3;SN  | 7  |
| cg26061357 | SMARCD3;SN  | 7  |
| cg14636077 | SMCR5;RAI1  | 17 |

|            |             |    |
|------------|-------------|----|
| cg02858512 | SMG6;SMG6   | 17 |
| cg07058377 | SMG6;SMG6   | 17 |
| cg23403980 | SMG6;SMG6   | 17 |
| cg02662873 | SMOC2;SMO   | 6  |
| cg04967737 | SMOC2;SMO   | 6  |
| cg07979566 | SMOC2;SMO   | 6  |
| cg08112248 | SMOC2;SMO   | 6  |
| cg09499136 | SMOC2;SMO   | 6  |
| cg10041417 | SMOC2;SMO   | 6  |
| cg17802216 | SMOC2;SMO   | 6  |
| cg21755672 | SMOC2;SMO   | 6  |
| cg22771904 | SMOC2;SMO   | 6  |
| cg25599473 | SMOC2;SMO   | 6  |
| cg26505935 | SMOC2;SMO   | 6  |
| cg00532477 | SMPD4;SMPI  | 2  |
| cg02415020 | SMYD3;SMYI  | 1  |
| cg12461735 | SMYD3;SMYI  | 1  |
| cg22024479 | SMYD3;SMYI  | 1  |
| cg25025181 | SMYD3;SMYI  | 1  |
| cg18592195 | SNAP47      | 1  |
| cg20643991 | SNCAIP      | 5  |
| cg22635676 | SNED1       | 2  |
| cg25241559 | SNED1       | 2  |
| cg15075241 | SNORA80B;C  | 2  |
| cg14556808 | SNX19       | 11 |
| cg22208536 | SNX25       | 4  |
| cg03512808 | SNX29       | 16 |
| cg20286094 | SNX7;SNX7   | 1  |
| cg14489081 | SNX9        | 6  |
| cg00429523 | SOBP        | 6  |
| cg13096007 | SOD3        | 4  |
| cg25449950 | SOD3;SOD3   | 4  |
| cg16622520 | SORBS1;SOR  | 10 |
| cg02370232 | SORBS1;SOR  | 10 |
| cg12197399 | SORBS2      | 4  |
| cg26583078 | SORBS2;SOR  | 4  |
| cg00387964 | SORCS2      | 4  |
| cg05075579 | SORL1       | 11 |
| cg10107783 | SORL1       | 11 |
| cg06205574 | SOX5;SOX5   | 12 |
| cg08992854 | SOX8        | 16 |
| cg11606261 | SP1;SP1     | 12 |
| cg25095994 | SP140L      | 2  |
| cg05730975 | SPAG16      | 2  |
| cg06571753 | SPARC       | 5  |
| cg25104266 | SPATA13;SPA | 13 |

|            |             |    |
|------------|-------------|----|
| cg27460824 | SPATA13;SPA | 13 |
| cg14669524 | SPATS1      | 6  |
| cg14774117 | SPATS1      | 6  |
| cg00556627 | SPATS2L;SPA | 2  |
| cg02882004 | SPATS2L;SPA | 2  |
| cg14106933 | SPATS2L;SPA | 2  |
| cg01727145 | SPEG        | 2  |
| cg03394909 | SPEG        | 2  |
| cg25008858 | SPEG        | 2  |
| cg23101680 | SPERT       | 13 |
| cg00084432 | SPG20       | 13 |
| cg05635923 | SPG20       | 13 |
| cg09410612 | SPG20       | 13 |
| cg15754752 | SPG20       | 13 |
| cg21056788 | SPG20       | 13 |
| cg21484515 | SPG20       | 13 |
| cg01539849 | SPI1;SPI1   | 11 |
| cg00401471 | SPINT2;SPIN | 19 |
| cg23083984 | SPN;SPN     | 16 |
| cg26691434 | SPN;SPN     | 16 |
| cg01571977 | SPPL2B;SPPL | 19 |
| cg22854448 | SPRED2      | 2  |
| cg08651590 | SPRED2;SPRE | 2  |
| cg00891995 | SPRR2C      | 1  |
| cg04778236 | SPSB1       | 1  |
| cg23632432 | SPSB1       | 1  |
| cg11622008 | SPSB4       | 3  |
| cg01626885 | SQRDL       | 15 |
| cg02531794 | SRCRB4D;ZP  | 7  |
| cg16928487 | SREBF1;SREB | 17 |
| cg27407935 | SREBF1;SREB | 17 |
| cg01668352 | SRGAP1      | 12 |
| cg04938109 | SRGAP1      | 12 |
| cg11014073 | SRGAP1      | 12 |
| cg17354987 | SRGAP1      | 12 |
| cg05811567 | SRGAP2;SRG  | 1  |
| cg27395226 | SRPK2       | 7  |
| cg05905586 | SSBP2       | 5  |
| cg06988422 | SSBP3;SSBP3 | 1  |
| cg19963589 | SSBP3;SSBP3 | 1  |
| cg24878115 | SSBP4;SSBP4 | 19 |
| cg14338936 | SSH2        | 17 |
| cg06422039 | SSTR5;LOC14 | 16 |
| cg09586924 | ST14        | 11 |
| cg22110158 | ST14        | 11 |
| cg03965649 | ST3GAL1;ST3 | 8  |

|            |             |    |
|------------|-------------|----|
| cg07168526 | ST7;ST7     | 7  |
| cg25784872 | STAG1       | 3  |
| cg24112733 | STARD3NL    | 7  |
| cg01146501 | STARD4      | 5  |
| cg12312086 | STARD9      | 15 |
| cg14951497 | STAT1;STAT1 | 2  |
| cg20173260 | STAT1;STAT1 | 2  |
| cg24718015 | STAT3;STAT3 | 17 |
| cg16777510 | STAT5A      | 17 |
| cg25440680 | STBD1       | 4  |
| cg07109745 | STIM1       | 11 |
| cg14143752 | STIM1       | 11 |
| cg03534504 | STK10       | 5  |
| cg16311462 | STK10       | 5  |
| cg26006084 | STK10       | 5  |
| cg14462124 | STK17B      | 2  |
| cg05828520 | STK19;DOM3  | 6  |
| cg16711597 | STK24       | 13 |
| cg16924565 | STK24;STK24 | 13 |
| cg18518262 | STK32C      | 10 |
| cg13431028 | STK39       | 2  |
| cg06631999 | STMN1       | 1  |
| cg21169762 | STON2       | 14 |
| cg01712428 | STX1A;STX1A | 7  |
| cg10260044 | SULF1;SULF1 | 8  |
| cg25426867 | SVIL;MIR938 | 10 |
| cg05814312 | SVIL;SVIL   | 10 |
| cg03108697 | SWAP70      | 11 |
| cg08010619 | SWAP70      | 11 |
| cg03310376 | SYN2        | 3  |
| cg15173428 | SYN3;SYN3;S | 22 |
| cg20476019 | SYN3;SYN3;S | 22 |
| cg05342835 | SYNC;SYNC   | 1  |
| cg19987354 | SYNE2;SYNE2 | 14 |
| cg03467087 | SYNJ2       | 6  |
| cg12002139 | SYNJ2       | 6  |
| cg01228193 | SYNPO       | 5  |
| cg05714559 | SYNPO;SYNP  | 5  |
| cg26444282 | SYNPO;SYNP  | 5  |
| cg20515580 | SYT12       | 11 |
| cg21544658 | SYT8        | 11 |
| cg03003434 | SYTL3       | 6  |
| cg11065271 | SYTL3       | 6  |
| cg12691330 | SYTL3       | 6  |
| cg00370106 | SYTL3;SYTL3 | 6  |
| cg15299510 | TACC1       | 8  |

|            |              |    |
|------------|--------------|----|
| cg11535638 | TACC2;TACC:  | 10 |
| cg11888747 | TADA3        | 3  |
| cg10666909 | TAP1         | 6  |
| cg13165140 | TAP1;PSMB8   | 6  |
| cg24131538 | TAPBPL       | 12 |
| cg15437231 | TBC1D15;TBC  | 12 |
| cg09780394 | TBC1D16      | 17 |
| cg13466546 | TBC1D16      | 17 |
| cg16461139 | TBC1D16      | 17 |
| cg17295878 | TBC1D16      | 17 |
| cg19004465 | TBC1D16      | 17 |
| cg23651872 | TBC1D16      | 17 |
| cg07397612 | TBC1D22A     | 22 |
| cg00472758 | TBC1D24      | 16 |
| cg01771850 | TBCD         | 17 |
| cg03535099 | TBCD         | 17 |
| cg19016694 | TBCD         | 17 |
| cg09771226 | TBKBP1       | 17 |
| cg04254487 | TBPL1        | 6  |
| cg01913455 | TBX2         | 17 |
| cg03753391 | TBX2         | 17 |
| cg10308654 | TBX2         | 17 |
| cg11631427 | TBX2         | 17 |
| cg27027242 | TBX2         | 17 |
| cg06462921 | TBXAS1;TBX/  | 7  |
| cg23759823 | TBXAS1;TBX/  | 7  |
| cg04794141 | TC2N         | 14 |
| cg01062443 | TCF3;TCF3    | 19 |
| cg03683087 | TCF7L2;TCF7  | 10 |
| cg05402891 | TCL1B;TCL1B  | 14 |
| cg09861057 | TDRD10;TDR   | 1  |
| cg15722533 | TEAD1        | 11 |
| cg25878366 | TEAD1        | 11 |
| cg01093854 | TET1         | 10 |
| cg14962509 | TFAP2E       | 1  |
| cg15339605 | TFEC;TFEC;TF | 7  |
| cg18335233 | TG           | 8  |
| cg08911152 | TG;SLA;SLA   | 8  |
| cg11155356 | TG;SLA;SLA;S | 8  |
| cg03630790 | TGFBR2;TGFI  | 3  |
| cg06270049 | TGFBR2;TGFI  | 3  |
| cg09417692 | TGFBR2;TGFI  | 3  |
| cg00857921 | TGFBR3       | 1  |
| cg02061431 | TGFBR3       | 1  |
| cg23105419 | THADA;THAC   | 2  |
| cg00836101 | THBS1        | 15 |



|            |             |    |
|------------|-------------|----|
| cg18234606 | THBS1       | 15 |
| cg01190276 | THRB;THRB;1 | 3  |
| cg13726166 | TIAF1;MYO1: | 17 |
| cg17730176 | TIAF1;MYO1: | 17 |
| cg04397137 | TIMP2       | 17 |
| cg15106744 | TIPARP      | 3  |
| cg02934719 | TK2         | 16 |
| cg14199629 | TLE1        | 9  |
| cg06800962 | TM4SF1      | 3  |
| cg13314965 | TM4SF19     | 3  |
| cg21090033 | TM4SF19     | 3  |
| cg11568379 | TM4SF4      | 3  |
| cg02641539 | TM7SF4      | 8  |
| cg03190661 | TMC8;TMC6   | 17 |
| cg22355895 | TMED5;TMEI  | 1  |
| cg02768480 | TMEM100     | 17 |
| cg06406157 | TMEM132A;'  | 11 |
| cg07522970 | TMEM140     | 7  |
| cg08016257 | TMEM140     | 7  |
| cg27641628 | TMEM140     | 7  |
| cg06456031 | TMEM140;TI  | 7  |
| cg07972322 | TMEM140;TI  | 7  |
| cg15139596 | TMEM149     | 19 |
| cg16927606 | TMEM149;TI  | 19 |
| cg16911583 | TMEM149;U.  | 19 |
| cg18172186 | TMEM200A;'  | 6  |
| cg03890628 | TMEM201     | 1  |
| cg06776976 | TMEM206     | 1  |
| cg00175735 | TMEM30C;TI  | 3  |
| cg07258715 | TMEM40      | 3  |
| cg01409343 | TMEM49      | 17 |
| cg02782634 | TMEM49      | 17 |
| cg19897979 | TMEM50A     | 1  |
| cg07192718 | TMEM61      | 1  |
| cg18973101 | TMEM79;SM   | 1  |
| cg17977470 | TMEM88      | 17 |
| cg01263574 | TMEM8C      | 9  |
| cg13736811 | TMEM91      | 19 |
| cg27144670 | TMOD3       | 15 |
| cg05183271 | TMPRSS5     | 11 |
| cg15844374 | TMPRSS5     | 11 |
| cg25460340 | TMPRSS5     | 11 |
| cg06733903 | TMTC1       | 12 |
| cg18927181 | TMTC1       | 12 |
| cg03191794 | TMTC2       | 12 |
| cg03037030 | TNF         | 6  |

|            |             |    |
|------------|-------------|----|
| cg10501093 | TNFAIP2     | 14 |
| cg07086380 | TNFAIP8;TNF | 5  |
| cg02134720 | TNFRSF11B   | 8  |
| cg11665613 | TNFRSF1B    | 1  |
| cg26691200 | TNFRSF8     | 1  |
| cg18152455 | TNFRSF8;TNF | 1  |
| cg20820107 | TNFRSF8;TNF | 1  |
| cg14153654 | TNFRSF9     | 1  |
| cg17267493 | TNFSF12;TNF | 17 |
| cg10861599 | TNFSF4      | 1  |
| cg21439763 | TNFSF4;TNFS | 1  |
| cg25737411 | TNK1        | 17 |
| cg18314765 | TNP1        | 2  |
| cg19384546 | TNP1        | 2  |
| cg20310485 | TNP1        | 2  |
| cg05687083 | TNRC18      | 7  |
| cg06947694 | TNRC18      | 7  |
| cg20025824 | TNRC18      | 7  |
| cg02481714 | TNRC6B      | 22 |
| cg12338137 | TNS1        | 2  |
| cg12731010 | TNS1        | 2  |
| cg03958512 | TNS3        | 7  |
| cg12292947 | TNS3        | 7  |
| cg14410503 | TNS3        | 7  |
| cg27275374 | TNS3        | 7  |
| cg01337207 | TNXB        | 6  |
| cg01992382 | TNXB        | 6  |
| cg02151997 | TNXB        | 6  |
| cg04757901 | TNXB        | 6  |
| cg08660959 | TNXB        | 6  |
| cg10365886 | TNXB        | 6  |
| cg10923662 | TNXB        | 6  |
| cg12694372 | TNXB        | 6  |
| cg14188106 | TNXB        | 6  |
| cg14196170 | TNXB        | 6  |
| cg14924781 | TNXB        | 6  |
| cg15745284 | TNXB        | 6  |
| cg16834823 | TNXB        | 6  |
| cg20407792 | TNXB        | 6  |
| cg23186098 | TNXB        | 6  |
| cg03466237 | TOLLIP      | 11 |
| cg05311626 | TOLLIP      | 11 |
| cg13843417 | TOLLIP      | 11 |
| cg26779330 | TOLLIP      | 11 |
| cg03376089 | TOM1L2;TOM  | 17 |
| cg10256045 | TPCN2       | 11 |

|            |              |    |
|------------|--------------|----|
| cg18053228 | TPCN2        | 11 |
| cg18389810 | TPPP2        | 14 |
| cg09856467 | TPST2;TPST2  | 22 |
| cg16704530 | TRAF3IP2;TR  | 6  |
| cg08504029 | TRAPPC9;TR/  | 8  |
| cg18219994 | TRAPPC9;TR/  | 8  |
| cg20946943 | TRAPPC9;TR/  | 8  |
| cg24388061 | TRAPPC9;TR/  | 8  |
| cg06196379 | TREM1        | 6  |
| cg21328082 | TREM1        | 6  |
| cg10981439 | TREM1;TREM   | 6  |
| cg16597079 | TRERF1       | 6  |
| cg01505556 | TRIM26       | 6  |
| cg14606478 | TRIM26       | 6  |
| cg14741870 | TRIM26       | 6  |
| cg01591152 | TRIM29       | 11 |
| cg01190484 | TRIM40;TRIN  | 6  |
| cg12077698 | TRIM62       | 1  |
| cg09258877 | TRIP12       | 2  |
| cg11421768 | TRIP13       | 5  |
| cg17206393 | TRPC4AP;TRF  | 20 |
| cg19011752 | TRPM2        | 21 |
| cg09093656 | TRPV2        | 17 |
| cg26719625 | TRPV2        | 17 |
| cg26358374 | TRPV4;TRPV4  | 12 |
| cg01769813 | TSC2;TSC2;T! | 16 |
| cg07730183 | TSC2;TSC2;T! | 16 |
| cg03097389 | TSC22D1;TSC  | 13 |
| cg10825315 | TSHR;TSHR;T  | 14 |
| cg18625627 | TSHR;TSHR;T  | 14 |
| cg01481646 | TSPAN14;TSF  | 10 |
| cg08560387 | TSPAN14;TSF  | 10 |
| cg24328142 | TSPAN15      | 10 |
| cg11958128 | TSPAN9;TSP/  | 12 |
| cg15852320 | TSPAN9;TSP/  | 12 |
| cg25672027 | TSPO;TSPO    | 22 |
| cg03646994 | TSSC1        | 2  |
| cg14461974 | TSSC1        | 2  |
| cg27639897 | TTC15        | 2  |
| cg15645660 | TTC22        | 1  |
| cg14340336 | TTC25        | 17 |
| cg11222440 | TTC7A        | 2  |
| cg10062874 | TTC7B        | 14 |
| cg08280368 | TTC9         | 14 |
| cg19319037 | TTF2         | 1  |
| cg05545910 | TLL1;TLL1    | 22 |

|            |               |    |
|------------|---------------|----|
| cg05519002 | TUB;TUB       | 11 |
| cg19050555 | TUBA1C        | 12 |
| cg01108243 | TUBB1         | 20 |
| cg13756273 | TUBB1;TUBB    | 20 |
| cg18978680 | TULP4;TULP4   | 6  |
| cg14557690 | UAP1L1        | 9  |
| cg16193278 | UBAC2;MIR6    | 13 |
| cg05257202 | UBAC2;UBAC    | 13 |
| cg07450210 | UBAC2;UBAC    | 13 |
| cg12578486 | UBAC2;UBAC    | 13 |
| cg24509225 | UBAC2;UBAC    | 13 |
| cg14711145 | UBE2B         | 5  |
| cg10628201 | UBE2L3;UBE2L3 | 22 |
| cg11554335 | UBE2L6        | 11 |
| cg06635797 | UHRF1;UHRF1   | 19 |
| cg25982880 | UHRF1;UHRF1   | 19 |
| cg14380013 | UNC119B       | 12 |
| cg20434422 | UOX           | 1  |
| cg03622431 | UOX;DNASE2    | 1  |
| cg07151747 | UPP2;UPP2     | 2  |
| cg04431002 | USP10         | 16 |
| cg02387639 | USP13         | 3  |
| cg07213414 | USP31         | 16 |
| cg01601926 | USP7          | 16 |
| cg04444027 | USP7          | 16 |
| cg09594210 | UST           | 6  |
| cg18800739 | UTRN          | 6  |
| cg11274172 | UVRAG         | 11 |
| cg14321837 | UXS1          | 2  |
| cg08201451 | VAC14         | 16 |
| cg17428922 | VARS2;VARS2   | 6  |
| cg04185382 | VASN;CORO7    | 16 |
| cg13954067 | VAV2;VAV2     | 9  |
| cg06710195 | VAV3          | 1  |
| cg25763716 | VCAM1;VCAI    | 1  |
| cg16492597 | VDAC1         | 5  |
| cg25219939 | VDR;VDR       | 12 |
| cg01589054 | VGLL4         | 3  |
| cg22841079 | VGLL4;VGLL4   | 3  |
| cg19880465 | VILL          | 3  |
| cg12595461 | VIT           | 2  |
| cg23654401 | VOPP1         | 7  |
| cg18224970 | VPS13B;VPS13B | 8  |
| cg26228280 | VPS13D;VPS13D | 1  |
| cg21689902 | VWA5A;VWA5A   | 11 |
| cg25884442 | VWF           | 12 |

|            |             |    |
|------------|-------------|----|
| cg09537568 | WDFY3;WDF   | 4  |
| cg09433910 | WDR81;WDF   | 17 |
| cg15058645 | WIPF1       | 2  |
| cg13885155 | WIPF1;WIPF: | 2  |
| cg27117828 | WIPF1;WIPF: | 2  |
| cg03983223 | WIPF1;WIPF: | 2  |
| cg18690368 | WIPF3       | 7  |
| cg13481840 | WNK2        | 9  |
| cg26053066 | WNK2        | 9  |
| cg10302498 | WNT5B;WNT   | 12 |
| cg02179982 | WNT7B       | 22 |
| cg07777652 | WRB         | 21 |
| cg24115019 | WWC1;WWC    | 5  |
| cg00657810 | WWP2;WWF    | 16 |
| cg01171429 | WWP2;WWF    | 16 |
| cg01656717 | WWP2;WWF    | 16 |
| cg02712546 | WWP2;WWF    | 16 |
| cg08701134 | WWP2;WWF    | 16 |
| cg09036558 | WWP2;WWF    | 16 |
| cg18484958 | WWTR1;WW    | 3  |
| cg10353683 | XCR1;XCR1   | 3  |
| cg11845168 | XPO4        | 13 |
| cg02412345 | XPO7;XPO7   | 8  |
| cg02889774 | XPO7;XPO7;) | 8  |
| cg02259047 | XRCC3;XRCC: | 14 |
| cg04986899 | XYLT1       | 16 |
| cg06635133 | XYLT1       | 16 |
| cg16546017 | XYLT1       | 16 |
| cg26706077 | XYLT1       | 16 |
| cg16640973 | YJEFN3      | 19 |
| cg11049439 | ZBTB12      | 6  |
| cg12026858 | ZBTB16;ZBTE | 11 |
| cg00004667 | ZBTB17      | 1  |
| cg14373380 | ZBTB17      | 1  |
| cg03025465 | ZBTB38      | 3  |
| cg14918743 | ZBTB42      | 14 |
| cg21250061 | ZBTB5       | 9  |
| cg00859858 | ZC3H12A     | 1  |
| cg06762457 | ZC3H12D     | 6  |
| cg14030904 | ZC3H12D     | 6  |
| cg04377850 | ZC3H18      | 16 |
| cg13191508 | ZC3H3       | 8  |
| cg17517442 | ZC3H3       | 8  |
| cg14189808 | ZC3H4       | 19 |
| cg04772241 | ZCCHC14     | 16 |
| cg27414087 | ZCCHC14     | 16 |

|            |               |    |
|------------|---------------|----|
| cg17310882 | ZDHHC14;ZD    | 6  |
| cg26608667 | ZFAND2A       | 7  |
| cg17552088 | ZFAND3        | 6  |
| cg10298741 | ZFHX3;ZFHX3   | 16 |
| cg07176589 | ZFHX4;LOC10   | 8  |
| cg13154413 | ZFYVE21       | 14 |
| cg04884025 | ZFYVE9;ZFYV   | 1  |
| cg25449440 | ZIC4;ZIC4;ZIC | 3  |
| cg02795981 | ZMIZ1         | 10 |
| cg10812439 | ZMIZ1         | 10 |
| cg14825905 | ZMIZ1         | 10 |
| cg20679052 | ZMIZ1         | 10 |
| cg05141341 | ZMIZ2;ZMIZ2   | 7  |
| cg27474223 | ZNF19         | 16 |
| cg27118035 | ZNF267        | 16 |
| cg14690467 | ZNF282        | 7  |
| cg03861065 | ZNF365;ZNF3   | 10 |
| cg19507160 | ZNF395        | 8  |
| cg26700277 | ZNF469        | 16 |
| cg16284674 | ZNF511;TUBA   | 10 |
| cg17675150 | ZNF532        | 18 |
| cg05957504 | ZNF608        | 5  |
| cg21213593 | ZNF608        | 5  |
| cg23598573 | ZNF609        | 15 |
| cg13798986 | ZNF653        | 19 |
| cg09939948 | ZNF710        | 15 |
| cg18443571 | ZNF710        | 15 |
| cg09427605 | ZNF827        | 4  |
| cg09652526 | ZNF831        | 20 |
| cg12968041 | ZNRF3         | 22 |
| cg00034336 |               | 2  |
| cg00043444 |               | 6  |
| cg00050294 |               | 1  |
| cg00051307 |               | 5  |
| cg00089966 |               | 5  |
| cg00092400 |               | 12 |
| cg00092565 |               | 21 |
| cg00098029 |               | 4  |
| cg00100420 |               | 4  |
| cg00121876 |               | 6  |
| cg00139681 |               | 7  |
| cg00150785 |               | 20 |
| cg00151251 |               | 2  |
| cg00168634 |               | 4  |
| cg00172872 |               | 12 |
| cg00184457 |               | 8  |

|            |    |
|------------|----|
| cg00209623 | 3  |
| cg00213052 | 18 |
| cg00252472 | 6  |
| cg00253248 | 17 |
| cg00271204 | 5  |
| cg00286119 | 8  |
| cg00335219 | 16 |
| cg00344308 | 3  |
| cg00345744 | 7  |
| cg00348891 | 13 |
| cg00366103 | 7  |
| cg00386035 | 6  |
| cg00387090 | 1  |
| cg00399683 | 7  |
| cg00459898 | 2  |
| cg00460983 | 10 |
| cg00462107 | 5  |
| cg00516092 | 20 |
| cg00568910 | 1  |
| cg00583068 | 1  |
| cg00594191 | 10 |
| cg00602295 | 16 |
| cg00657780 | 16 |
| cg00709966 | 7  |
| cg00724403 | 2  |
| cg00750630 | 14 |
| cg00760950 | 13 |
| cg00782839 | 2  |
| cg00792107 | 12 |
| cg00830419 | 2  |
| cg00834923 | 16 |
| cg00835745 | 15 |
| cg00866541 | 16 |
| cg00874032 | 3  |
| cg00960147 | 1  |
| cg00964997 | 4  |
| cg00975624 | 3  |
| cg01025233 | 5  |
| cg01034811 | 8  |
| cg01037082 | 22 |
| cg01072388 | 16 |
| cg01081168 | 1  |
| cg01095004 | 16 |
| cg01099150 | 2  |
| cg01116425 | 2  |
| cg01117339 | 11 |

|            |    |
|------------|----|
| cg01152374 | 15 |
| cg01168833 | 12 |
| cg01195545 | 7  |
| cg01234251 | 11 |
| cg01250603 | 10 |
| cg01275133 | 16 |
| cg01311151 | 12 |
| cg01413548 | 6  |
| cg01413671 | 16 |
| cg01423916 | 11 |
| cg01432692 | 1  |
| cg01433527 | 7  |
| cg01481978 | 16 |
| cg01510278 | 16 |
| cg01555052 | 14 |
| cg01558931 | 5  |
| cg01645729 | 2  |
| cg01702055 | 6  |
| cg01719405 | 14 |
| cg01733904 | 13 |
| cg01765623 | 17 |
| cg01766850 | 6  |
| cg01771065 | 14 |
| cg01803461 | 16 |
| cg01830154 | 17 |
| cg01832712 | 3  |
| cg01872122 | 5  |
| cg01898377 | 20 |
| cg01905967 | 5  |
| cg01940753 | 15 |
| cg01952913 | 8  |
| cg01955153 | 16 |
| cg01957897 | 15 |
| cg01962750 | 2  |
| cg01977798 | 1  |
| cg01987353 | 17 |
| cg02001991 | 4  |
| cg02059176 | 2  |
| cg02059896 | 2  |
| cg02063759 | 1  |
| cg02063817 | 7  |
| cg02064798 | 4  |
| cg02067239 | 16 |
| cg02084467 | 17 |
| cg02104392 | 2  |
| cg02138953 | 10 |



|            |    |
|------------|----|
| cg02142926 | 6  |
| cg02203714 | 16 |
| cg02229757 | 16 |
| cg02274236 | 7  |
| cg02322889 | 4  |
| cg02327773 | 7  |
| cg02332936 | 9  |
| cg02338840 | 2  |
| cg02352281 | 3  |
| cg02360002 | 6  |
| cg02370923 | 2  |
| cg02383285 | 6  |
| cg02420480 | 7  |
| cg02433979 | 7  |
| cg02463513 | 3  |
| cg02506275 | 12 |
| cg02516703 | 5  |
| cg02518338 | 17 |
| cg02522990 | 16 |
| cg02525997 | 8  |
| cg02571436 | 10 |
| cg02574863 | 3  |
| cg02608831 | 8  |
| cg02621151 | 5  |
| cg02624905 | 6  |
| cg02640104 | 13 |
| cg02654265 | 5  |
| cg02655361 | 3  |
| cg02691192 | 17 |
| cg02698668 | 19 |
| cg02730156 | 21 |
| cg02803141 | 16 |
| cg02849507 | 16 |
| cg02849956 | 19 |
| cg02914097 | 3  |
| cg02932364 | 1  |
| cg03097134 | 6  |
| cg03108347 | 11 |
| cg03116409 | 12 |
| cg03127349 | 10 |
| cg03129324 | 10 |
| cg03155825 | 7  |
| cg03176917 | 19 |
| cg03188000 | 12 |
| cg03190769 | 2  |
| cg03214130 | 7  |

|            |    |
|------------|----|
| cg03221837 | 16 |
| cg03252770 | 4  |
| cg03262260 | 16 |
| cg03278514 | 15 |
| cg03343669 | 2  |
| cg03373714 | 2  |
| cg03396664 | 16 |
| cg03402926 | 11 |
| cg03411579 | 12 |
| cg03453870 | 15 |
| cg03466587 | 3  |
| cg03499161 | 12 |
| cg03503942 | 20 |
| cg03548062 | 14 |
| cg03548415 | 11 |
| cg03558269 | 16 |
| cg03585720 | 1  |
| cg03593014 | 10 |
| cg03618113 | 12 |
| cg03660096 | 8  |
| cg03663556 | 7  |
| cg03703733 | 6  |
| cg03712403 | 12 |
| cg03772020 | 6  |
| cg03796381 | 15 |
| cg03810376 | 1  |
| cg03858917 | 11 |
| cg03923640 | 16 |
| cg03959186 | 2  |
| cg03994717 | 6  |
| cg04031093 | 1  |
| cg04035553 | 8  |
| cg04057599 | 11 |
| cg04137004 | 11 |
| cg04139043 | 1  |
| cg04166812 | 14 |
| cg04184716 | 14 |
| cg04213390 | 2  |
| cg04230891 | 6  |
| cg04239863 | 16 |
| cg04244152 | 10 |
| cg04245294 | 3  |
| cg04349084 | 8  |
| cg04361019 | 2  |
| cg04399631 | 3  |
| cg04462931 | 7  |

|            |    |
|------------|----|
| cg04481603 | 10 |
| cg04494873 | 5  |
| cg04500909 | 5  |
| cg04510459 | 1  |
| cg04522310 | 16 |
| cg04524475 | 13 |
| cg04589649 | 2  |
| cg04649852 | 16 |
| cg04657325 | 4  |
| cg04658679 | 12 |
| cg04718050 | 14 |
| cg04762129 | 6  |
| cg04783450 | 6  |
| cg04797957 | 17 |
| cg04819760 | 10 |
| cg04852323 | 16 |
| cg04871472 | 2  |
| cg04914930 | 13 |
| cg04921646 | 1  |
| cg04926881 | 7  |
| cg04935436 | 20 |
| cg05005073 | 1  |
| cg05021291 | 2  |
| cg05068848 | 4  |
| cg05068866 | 3  |
| cg05132925 | 1  |
| cg05144620 | 17 |
| cg05148180 | 10 |
| cg05153781 | 14 |
| cg05168229 | 13 |
| cg05184395 | 6  |
| cg05191655 | 4  |
| cg05191919 | 5  |
| cg05234552 | 6  |
| cg05271255 | 17 |
| cg05276184 | 15 |
| cg05382185 | 6  |
| cg05389236 | 6  |
| cg05403316 | 2  |
| cg05468458 | 5  |
| cg05494668 | 11 |
| cg05512561 | 13 |
| cg05540639 | 16 |
| cg05562828 | 17 |
| cg05599759 | 20 |
| cg05711023 | 3  |

|            |    |
|------------|----|
| cg05753629 | 1  |
| cg05762612 | 18 |
| cg05765734 | 8  |
| cg05804846 | 11 |
| cg05829375 | 16 |
| cg05871756 | 5  |
| cg05881698 | 19 |
| cg05926640 | 1  |
| cg05928033 | 1  |
| cg05932560 | 16 |
| cg05933510 | 1  |
| cg05935904 | 6  |
| cg05979457 | 8  |
| cg05979766 | 5  |
| cg05998301 | 2  |
| cg06002476 | 3  |
| cg06139749 | 7  |
| cg06159353 | 5  |
| cg06169746 | 3  |
| cg06178669 | 11 |
| cg06192592 | 6  |
| cg06193628 | 2  |
| cg06194070 | 9  |
| cg06213047 | 16 |
| cg06215984 | 1  |
| cg06223926 | 10 |
| cg06233186 | 12 |
| cg06256007 | 11 |
| cg06271720 | 2  |
| cg06287548 | 21 |
| cg06322557 | 3  |
| cg06361606 | 1  |
| cg06368184 | 21 |
| cg06389605 | 6  |
| cg06434490 | 6  |
| cg06450976 | 6  |
| cg06453241 | 2  |
| cg06480353 | 7  |
| cg06551697 | 17 |
| cg06581409 | 19 |
| cg06627087 | 19 |
| cg06636220 | 3  |
| cg06646139 | 4  |
| cg06647928 | 5  |
| cg06711306 | 5  |
| cg06720014 | 1  |

|            |    |
|------------|----|
| cg06788267 | 1  |
| cg06798115 | 3  |
| cg06803420 | 5  |
| cg06828143 | 5  |
| cg06829584 | 10 |
| cg06934774 | 7  |
| cg06946797 | 16 |
| cg07013698 | 17 |
| cg07029024 | 11 |
| cg07076836 | 15 |
| cg07080244 | 11 |
| cg07081245 | 11 |
| cg07095347 | 6  |
| cg07095818 | 20 |
| cg07096763 | 1  |
| cg07126126 | 16 |
| cg07142009 | 17 |
| cg07144720 | 3  |
| cg07148025 | 5  |
| cg07191524 | 16 |
| cg07217824 | 7  |
| cg07220152 | 6  |
| cg07230078 | 4  |
| cg07243202 | 8  |
| cg07271186 | 7  |
| cg07283896 | 6  |
| cg07285237 | 6  |
| cg07347205 | 16 |
| cg07356549 | 1  |
| cg07482222 | 19 |
| cg07484739 | 2  |
| cg07545858 | 16 |
| cg07554408 | 14 |
| cg07559178 | 14 |
| cg07571379 | 11 |
| cg07584582 | 22 |
| cg07593977 | 8  |
| cg07698336 | 11 |
| cg07700233 | 4  |
| cg07749597 | 5  |
| cg07765595 | 16 |
| cg07786355 | 10 |
| cg07807757 | 7  |
| cg07818978 | 15 |
| cg07866909 | 2  |
| cg07879474 | 5  |

|            |    |
|------------|----|
| cg07904073 | 10 |
| cg07950220 | 16 |
| cg07972716 | 20 |
| cg07980854 | 20 |
| cg08015107 | 11 |
| cg08026493 | 8  |
| cg08037719 | 1  |
| cg08064488 | 21 |
| cg08136020 | 6  |
| cg08166729 | 7  |
| cg08200420 | 2  |
| cg08211704 | 8  |
| cg08243094 | 1  |
| cg08243401 | 13 |
| cg08257009 | 14 |
| cg08357895 | 5  |
| cg08374552 | 5  |
| cg08375396 | 11 |
| cg08422793 | 15 |
| cg08454015 | 1  |
| cg08474826 | 1  |
| cg08486065 | 19 |
| cg08488569 | 4  |
| cg08510178 | 6  |
| cg08549390 | 7  |
| cg08550517 | 16 |
| cg08584947 | 8  |
| cg08639279 | 11 |
| cg08653258 | 3  |
| cg08672919 | 6  |
| cg08698943 | 10 |
| cg08787698 | 2  |
| cg08858426 | 17 |
| cg08866665 | 6  |
| cg08866876 | 8  |
| cg08873746 | 2  |
| cg08879390 | 19 |
| cg08894532 | 19 |
| cg08900511 | 1  |
| cg08913523 | 8  |
| cg08939394 | 1  |
| cg08959094 | 16 |
| cg08981669 | 7  |
| cg08986840 | 8  |
| cg09007841 | 16 |
| cg09011316 | 1  |

|            |    |
|------------|----|
| cg09030187 | 1  |
| cg09051342 | 8  |
| cg09077862 | 5  |
| cg09089118 | 7  |
| cg09139491 | 13 |
| cg09140531 | 6  |
| cg09197279 | 2  |
| cg09225373 | 6  |
| cg09244312 | 13 |
| cg09247170 | 14 |
| cg09264231 | 1  |
| cg09267467 | 1  |
| cg09278098 | 12 |
| cg09320079 | 16 |
| cg09326079 | 2  |
| cg09338148 | 16 |
| cg09364426 | 1  |
| cg09408917 | 21 |
| cg09437523 | 16 |
| cg09476092 | 21 |
| cg09477232 | 7  |
| cg09501314 | 15 |
| cg09501717 | 2  |
| cg09502464 | 7  |
| cg09528494 | 8  |
| cg09533305 | 22 |
| cg09539496 | 8  |
| cg09548241 | 1  |
| cg09558425 | 10 |
| cg09564361 | 8  |
| cg09599062 | 3  |
| cg09678539 | 2  |
| cg09714919 | 16 |
| cg09764611 | 12 |
| cg09767588 | 1  |
| cg09788978 | 16 |
| cg09801824 | 10 |
| cg09807446 | 16 |
| cg09835740 | 5  |
| cg09867546 | 6  |
| cg09884419 | 15 |
| cg09907439 | 12 |
| cg09936919 | 2  |
| cg09937500 | 2  |
| cg09941601 | 16 |
| cg10097313 | 14 |

|            |    |
|------------|----|
| cg10149296 | 2  |
| cg10174683 | 16 |
| cg10193711 | 14 |
| cg10274208 | 13 |
| cg10310751 | 11 |
| cg10334416 | 17 |
| cg10377510 | 1  |
| cg10410412 | 10 |
| cg10440877 | 2  |
| cg10466548 | 16 |
| cg10476950 | 7  |
| cg10484693 | 10 |
| cg10492240 | 4  |
| cg10533060 | 16 |
| cg10548805 | 14 |
| cg10577819 | 2  |
| cg10601624 | 12 |
| cg10606620 | 4  |
| cg10717408 | 1  |
| cg10777347 | 7  |
| cg10784519 | 6  |
| cg10793646 | 12 |
| cg10809166 | 12 |
| cg10809958 | 7  |
| cg10828561 | 8  |
| cg10840277 | 8  |
| cg10992465 | 1  |
| cg11045529 | 20 |
| cg11119301 | 12 |
| cg11176481 | 5  |
| cg11225089 | 5  |
| cg11254532 | 1  |
| cg11260715 | 7  |
| cg11286742 | 3  |
| cg11332163 | 4  |
| cg11353598 | 15 |
| cg11370814 | 2  |
| cg11422851 | 8  |
| cg11423680 | 5  |
| cg11465213 | 15 |
| cg11466131 | 22 |
| cg11470941 | 4  |
| cg11539857 | 6  |
| cg11670789 | 15 |
| cg11698445 | 5  |
| cg11703759 | 1  |



|            |    |
|------------|----|
| cg11746048 | 11 |
| cg11760395 | 10 |
| cg11763066 | 6  |
| cg11781335 | 10 |
| cg11786870 | 1  |
| cg11792824 | 6  |
| cg11841288 | 1  |
| cg11929693 | 5  |
| cg11932575 | 4  |
| cg11955727 | 2  |
| cg11958234 | 1  |
| cg11964099 | 17 |
| cg12019475 | 6  |
| cg12030226 | 11 |
| cg12048965 | 10 |
| cg12071775 | 14 |
| cg12082516 | 1  |
| cg12109883 | 15 |
| cg12130672 | 17 |
| cg12143499 | 12 |
| cg12192282 | 2  |
| cg12201544 | 6  |
| cg12207367 | 2  |
| cg12277789 | 10 |
| cg12277870 | 1  |
| cg12315995 | 15 |
| cg12331004 | 2  |
| cg12354056 | 3  |
| cg12378001 | 7  |
| cg12422351 | 1  |
| cg12457659 | 21 |
| cg12499062 | 18 |
| cg12512771 | 7  |
| cg12534147 | 5  |
| cg12570032 | 11 |
| cg12593746 | 1  |
| cg12656681 | 5  |
| cg12659883 | 1  |
| cg12670123 | 10 |
| cg12686441 | 8  |
| cg12697139 | 1  |
| cg12790424 | 14 |
| cg12809483 | 5  |
| cg12888521 | 8  |
| cg12895857 | 6  |
| cg12899747 | 3  |

|            |    |
|------------|----|
| cg12905176 | 3  |
| cg13052638 | 1  |
| cg13055709 | 1  |
| cg13063274 | 3  |
| cg13067635 | 1  |
| cg13074572 | 7  |
| cg13106758 | 15 |
| cg13155421 | 3  |
| cg13207733 | 7  |
| cg13215862 | 15 |
| cg13235761 | 1  |
| cg13280063 | 6  |
| cg13306815 | 6  |
| cg13340765 | 8  |
| cg13391028 | 11 |
| cg13401658 | 2  |
| cg13406593 | 9  |
| cg13410764 | 9  |
| cg13426642 | 12 |
| cg13427361 | 4  |
| cg13427748 | 15 |
| cg13432945 | 1  |
| cg13460850 | 3  |
| cg13463465 | 2  |
| cg13476964 | 7  |
| cg13520053 | 9  |
| cg13537774 | 9  |
| cg13638282 | 9  |
| cg13645530 | 12 |
| cg13716585 | 14 |
| cg13755270 | 3  |
| cg13767779 | 17 |
| cg13777730 | 1  |
| cg13796936 | 1  |
| cg13821914 | 11 |
| cg13842240 | 4  |
| cg13857933 | 1  |
| cg13873324 | 1  |
| cg13905238 | 3  |
| cg13912307 | 11 |
| cg13993197 | 1  |
| cg14016418 | 2  |
| cg14041701 | 11 |
| cg14054279 | 3  |
| cg14097568 | 1  |
| cg14099845 | 19 |

|            |    |
|------------|----|
| cg14101442 | 11 |
| cg14101940 | 2  |
| cg14111437 | 5  |
| cg14118997 | 14 |
| cg14123436 | 9  |
| cg14129735 | 6  |
| cg14184907 | 12 |
| cg14189441 | 10 |
| cg14189786 | 8  |
| cg14213105 | 9  |
| cg14217495 | 1  |
| cg14232108 | 9  |
| cg14236118 | 4  |
| cg14241836 | 7  |
| cg14256511 | 12 |
| cg14297340 | 9  |
| cg14310533 | 12 |
| cg14326909 | 6  |
| cg14327359 | 2  |
| cg14359798 | 11 |
| cg14360029 | 9  |
| cg14378231 | 1  |
| cg14380474 | 1  |
| cg14387626 | 14 |
| cg14398113 | 15 |
| cg14434062 | 15 |
| cg14462040 | 9  |
| cg14482712 | 15 |
| cg14488466 | 9  |
| cg14498227 | 11 |
| cg14508696 | 15 |
| cg14523804 | 17 |
| cg14574066 | 11 |
| cg14651936 | 9  |
| cg14658300 | 5  |
| cg14671011 | 5  |
| cg14833626 | 4  |
| cg14883605 | 14 |
| cg14918548 | 2  |
| cg14947010 | 16 |
| cg14961690 | 11 |
| cg15025379 | 11 |
| cg15030449 | 1  |
| cg15065627 | 2  |
| cg15074524 | 2  |
| cg15134714 | 8  |

|            |    |
|------------|----|
| cg15164702 | 10 |
| cg15257489 | 8  |
| cg15305352 | 6  |
| cg15317049 | 21 |
| cg15331705 | 8  |
| cg15457481 | 4  |
| cg15476994 | 6  |
| cg15499368 | 5  |
| cg15540602 | 14 |
| cg15556591 | 4  |
| cg15578332 | 3  |
| cg15613991 | 7  |
| cg15705813 | 2  |
| cg15717275 | 22 |
| cg15724945 | 1  |
| cg15732079 | 7  |
| cg15742777 | 2  |
| cg15765889 | 2  |
| cg15812586 | 7  |
| cg15824962 | 1  |
| cg15825304 | 2  |
| cg15835664 | 1  |
| cg15852553 | 6  |
| cg15857051 | 14 |
| cg15867307 | 2  |
| cg15893295 | 6  |
| cg15924102 | 1  |
| cg15942368 | 7  |
| cg15967278 | 8  |
| cg15981982 | 2  |
| cg16001689 | 6  |
| cg16037200 | 15 |
| cg16099687 | 12 |
| cg16106254 | 12 |
| cg16152753 | 10 |
| cg16163174 | 6  |
| cg16163382 | 2  |
| cg16206344 | 6  |
| cg16213787 | 2  |
| cg16223546 | 5  |
| cg16251016 | 19 |
| cg16278514 | 3  |
| cg16295461 | 4  |
| cg16362189 | 11 |
| cg16377959 | 5  |
| cg16408820 | 8  |

|            |    |
|------------|----|
| cg16426034 | 11 |
| cg16440978 | 14 |
| cg16444826 | 2  |
| cg16474118 | 2  |
| cg16479476 | 6  |
| cg16506426 | 5  |
| cg16534399 | 16 |
| cg16572600 | 11 |
| cg16578085 | 4  |
| cg16596317 | 1  |
| cg16598679 | 14 |
| cg16600876 | 8  |
| cg16622061 | 16 |
| cg16651768 | 1  |
| cg16656520 | 6  |
| cg16657152 | 8  |
| cg16663891 | 3  |
| cg16667631 | 5  |
| cg16685313 | 1  |
| cg16700163 | 16 |
| cg16704703 | 10 |
| cg16783186 | 2  |
| cg16784234 | 7  |
| cg16973527 | 15 |
| cg17017878 | 6  |
| cg17033891 | 3  |
| cg17077610 | 10 |
| cg17083685 | 13 |
| cg17091056 | 2  |
| cg17126947 | 4  |
| cg17159058 | 8  |
| cg17164513 | 19 |
| cg17172308 | 6  |
| cg17180237 | 1  |
| cg17209471 | 22 |
| cg17382879 | 13 |
| cg17393083 | 3  |
| cg17411016 | 2  |
| cg17427675 | 5  |
| cg17494199 | 13 |
| cg17516571 | 8  |
| cg17540450 | 13 |
| cg17573301 | 5  |
| cg17588094 | 8  |
| cg17593342 | 6  |
| cg17598999 | 5  |

|            |    |
|------------|----|
| cg17609158 | 6  |
| cg17666418 | 6  |
| cg17694351 | 7  |
| cg17709804 | 11 |
| cg17722435 | 7  |
| cg17779002 | 8  |
| cg17896243 | 8  |
| cg17922998 | 8  |
| cg17947364 | 6  |
| cg17955599 | 22 |
| cg17969662 | 1  |
| cg18054281 | 10 |
| cg18064917 | 2  |
| cg18103859 | 14 |
| cg18141622 | 2  |
| cg18200075 | 1  |
| cg18207999 | 17 |
| cg18229196 | 10 |
| cg18239481 | 10 |
| cg18257574 | 2  |
| cg18263166 | 7  |
| cg18320356 | 12 |
| cg18384190 | 10 |
| cg18388547 | 1  |
| cg18413218 | 14 |
| cg18436984 | 7  |
| cg18469813 | 6  |
| cg18489994 | 4  |
| cg18518916 | 4  |
| cg18526008 | 3  |
| cg18530568 | 2  |
| cg18553570 | 12 |
| cg18655633 | 19 |
| cg18659867 | 10 |
| cg18718469 | 6  |
| cg18720803 | 4  |
| cg18745317 | 5  |
| cg18767278 | 5  |
| cg18802138 | 16 |
| cg18829443 | 2  |
| cg18833994 | 5  |
| cg18869244 | 17 |
| cg18926409 | 15 |
| cg19009471 | 14 |
| cg19169932 | 15 |
| cg19186056 | 11 |

|            |    |
|------------|----|
| cg19241927 | 1  |
| cg19266329 | 1  |
| cg19290938 | 11 |
| cg19318537 | 11 |
| cg19410609 | 2  |
| cg19445758 | 6  |
| cg19476334 | 12 |
| cg19479609 | 2  |
| cg19480965 | 6  |
| cg19513492 | 12 |
| cg19516754 | 6  |
| cg19526685 | 8  |
| cg19530168 | 11 |
| cg19547330 | 5  |
| cg19577365 | 14 |
| cg19595295 | 17 |
| cg19616339 | 2  |
| cg19699682 | 3  |
| cg19704902 | 2  |
| cg19735151 | 10 |
| cg19742687 | 11 |
| cg19746982 | 18 |
| cg19771350 | 11 |
| cg19807286 | 5  |
| cg19867579 | 2  |
| cg19883472 | 6  |
| cg19936812 | 5  |
| cg19990373 | 2  |
| cg19994159 | 13 |
| cg20012607 | 13 |
| cg20031845 | 7  |
| cg20062681 | 11 |
| cg20073893 | 14 |
| cg20098468 | 8  |
| cg20101110 | 11 |
| cg20155035 | 1  |
| cg20168495 | 4  |
| cg20170223 | 20 |
| cg20208979 | 6  |
| cg20223392 | 8  |
| cg20405742 | 6  |
| cg20462493 | 5  |
| cg20475082 | 2  |
| cg20544372 | 7  |
| cg20597127 | 1  |
| cg20608895 | 13 |

|            |    |
|------------|----|
| cg20617957 | 13 |
| cg20685713 | 1  |
| cg20697025 | 7  |
| cg20741418 | 11 |
| cg20743628 | 7  |
| cg20788482 | 22 |
| cg20801645 | 15 |
| cg20824932 | 6  |
| cg20873416 | 6  |
| cg20886660 | 13 |
| cg20889322 | 11 |
| cg20893203 | 6  |
| cg20972199 | 11 |
| cg20991420 | 2  |
| cg21034034 | 2  |
| cg21052660 | 6  |
| cg21121082 | 11 |
| cg21172011 | 21 |
| cg21177821 | 14 |
| cg21221767 | 14 |
| cg21241675 | 9  |
| cg21308365 | 6  |
| cg21348406 | 17 |
| cg21392435 | 8  |
| cg21393051 | 1  |
| cg21398275 | 6  |
| cg21437157 | 8  |
| cg21464704 | 6  |
| cg21470704 | 2  |
| cg21502476 | 3  |
| cg21514612 | 4  |
| cg21535606 | 1  |
| cg21557087 | 2  |
| cg21568661 | 15 |
| cg21707089 | 8  |
| cg21748138 | 2  |
| cg21752469 | 8  |
| cg21807262 | 14 |
| cg21814178 | 12 |
| cg21897970 | 17 |
| cg21917512 | 2  |
| cg21920167 | 14 |
| cg21943117 | 1  |
| cg21949194 | 2  |
| cg21964252 | 1  |
| cg22006060 | 4  |



|            |    |
|------------|----|
| cg22013019 | 6  |
| cg22021794 | 5  |
| cg22036872 | 1  |
| cg22138219 | 8  |
| cg22164009 | 6  |
| cg22183373 | 4  |
| cg22225179 | 17 |
| cg22229039 | 1  |
| cg22251148 | 11 |
| cg22293458 | 3  |
| cg22303083 | 8  |
| cg22304705 | 2  |
| cg22364204 | 11 |
| cg22374586 | 2  |
| cg22375757 | 3  |
| cg22479161 | 5  |
| cg22499307 | 3  |
| cg22500261 | 22 |
| cg22534374 | 1  |
| cg22538557 | 19 |
| cg22540135 | 19 |
| cg22560214 | 4  |
| cg22588983 | 5  |
| cg22593432 | 13 |
| cg22615203 | 13 |
| cg22699768 | 1  |
| cg22730655 | 1  |
| cg22761483 | 2  |
| cg22804528 | 3  |
| cg22822656 | 8  |
| cg22840887 | 10 |
| cg22912834 | 2  |
| cg22968789 | 15 |
| cg23003225 | 3  |
| cg23009263 | 14 |
| cg23027179 | 5  |
| cg23086519 | 14 |
| cg23096806 | 10 |
| cg23143090 | 6  |
| cg23172911 | 1  |
| cg23291376 | 2  |
| cg23314893 | 5  |
| cg23340777 | 12 |
| cg23361127 | 5  |
| cg23365135 | 7  |
| cg23375895 | 6  |

|            |    |
|------------|----|
| cg23391288 | 13 |
| cg23429664 | 10 |
| cg23440636 | 5  |
| cg23462772 | 10 |
| cg23487517 | 11 |
| cg23489384 | 14 |
| cg23521140 | 2  |
| cg23535322 | 14 |
| cg23591955 | 14 |
| cg23598010 | 12 |
| cg23614811 | 17 |
| cg23678364 | 4  |
| cg23681616 | 17 |
| cg23751171 | 12 |
| cg23756173 | 17 |
| cg23756265 | 11 |
| cg23879937 | 4  |
| cg23883632 | 14 |
| cg23992493 | 17 |
| cg24006667 | 7  |
| cg24006770 | 1  |
| cg24045357 | 2  |
| cg24053992 | 1  |
| cg24103651 | 10 |
| cg24114813 | 5  |
| cg24178897 | 14 |
| cg24292665 | 11 |
| cg24296187 | 1  |
| cg24335092 | 3  |
| cg24369185 | 6  |
| cg24384120 | 10 |
| cg24405567 | 15 |
| cg24459147 | 21 |
| cg24486958 | 1  |
| cg24505713 | 11 |
| cg24527636 | 1  |
| cg24571086 | 10 |
| cg24617444 | 10 |
| cg24623760 | 12 |
| cg24674269 | 13 |
| cg24680415 | 17 |
| cg24686551 | 3  |
| cg24692595 | 3  |
| cg24720604 | 5  |
| cg24930059 | 17 |
| cg24939196 | 6  |

|            |    |
|------------|----|
| cg24941342 | 11 |
| cg24954967 | 3  |
| cg24985060 | 15 |
| cg25024515 | 12 |
| cg25051510 | 12 |
| cg25116792 | 3  |
| cg25249728 | 2  |
| cg25252017 | 6  |
| cg25256538 | 6  |
| cg25306875 | 2  |
| cg25351353 | 12 |
| cg25388800 | 5  |
| cg25439798 | 21 |
| cg25464265 | 1  |
| cg25483123 | 12 |
| cg25526960 | 10 |
| cg25537245 | 17 |
| cg25552018 | 1  |
| cg25555753 | 19 |
| cg25556051 | 4  |
| cg25673591 | 17 |
| cg25695992 | 2  |
| cg25738326 | 15 |
| cg25747670 | 1  |
| cg25765315 | 12 |
| cg25766247 | 8  |
| cg25772185 | 10 |
| cg25827670 | 17 |
| cg25831439 | 2  |
| cg25840608 | 15 |
| cg25928986 | 7  |
| cg25943481 | 15 |
| cg25946790 | 14 |
| cg25969107 | 15 |
| cg26057577 | 2  |
| cg26097711 | 15 |
| cg26107642 | 5  |
| cg26113233 | 5  |
| cg26118358 | 14 |
| cg26118643 | 1  |
| cg26123824 | 10 |
| cg26144458 | 21 |
| cg26196626 | 8  |
| cg26203328 | 15 |
| cg26236329 | 11 |
| cg26272651 | 8  |

|            |    |
|------------|----|
| cg26300517 | 4  |
| cg26314722 | 1  |
| cg26325867 | 6  |
| cg26373051 | 2  |
| cg26404226 | 10 |
| cg26415787 | 12 |
| cg26540315 | 11 |
| cg26579550 | 15 |
| cg26601431 | 1  |
| cg26613811 | 7  |
| cg26671477 | 1  |
| cg26699655 | 11 |
| cg26710983 | 16 |
| cg26780125 | 8  |
| cg26821681 | 8  |
| cg26853787 | 2  |
| cg26856924 | 1  |
| cg26884359 | 17 |
| cg26891237 | 6  |
| cg26906217 | 11 |
| cg26954951 | 6  |
| cg26962618 | 15 |
| cg26976707 | 11 |
| cg27109912 | 17 |
| cg27133959 | 3  |
| cg27200630 | 3  |
| cg27223805 | 11 |
| cg27227317 | 2  |
| cg27268352 | 10 |
| cg27282397 | 2  |
| cg27317919 | 7  |
| cg27360992 | 22 |
| cg27365991 | 5  |
| cg27381488 | 16 |
| cg27409484 | 6  |
| cg27423739 | 3  |
| cg27438754 | 16 |
| cg27449200 | 15 |
| cg27482619 | 10 |
| cg27511894 | 1  |
| cg27535538 | 7  |
| cg27540865 | 1  |
| cg27576694 | 7  |
| cg27577928 | 4  |
| cg27584135 | 3  |
| cg27621721 | 3  |

|                 |    |
|-----------------|----|
| cg27638284      | 20 |
| cg27661394      | 4  |
| :h.10.80061816F | 10 |
| :h.2.105901354F | 2  |
| ch.4.194519R    | 4  |
