# Supplementary material for: Characterization of the Cartilage DNA Methylome in Knee and Hip Osteoarthritis
Source: PubMed Central journal article supplement — Arthritis Rheumatol. 2014 Aug 26;66(9):2450–60. doi: 10.1002/art.38713 (PMC4314681; doi:10.1002/art.38713), 2014-08-26
Supplement: art0066-2450-sd6.pdf [file art0066-2450-sd6.pdf]

**Supplementary Table 7.** List of DMLs identified between OA knee and OA hip samples.**Hypermethylated in OA hip**

| Probe      | Gene        | CHR | adj.p.val  | Mean $\beta$ -value<br>OA Knee | Mean $\beta$ -value<br>OA hip |
|------------|-------------|-----|------------|--------------------------------|-------------------------------|
| cg15769388 | A2ML1       | 12  | 1.18E-10   | 0.436813338                    | 0.576101002                   |
| cg20495677 | AAA1;NPSR1  | 7   | 1.45E-06   | 0.302545598                    | 0.4705897                     |
| cg16981346 | AARSD1;AAR  | 17  | 9.16E-07   | 0.494034101                    | 0.638203026                   |
| cg06213598 | ABCA9       | 17  | 0.00066945 | 0.500980679                    | 0.624327671                   |
| cg02316713 | ABCG1;ABCG  | 21  | 1.03E-07   | 0.548227557                    | 0.676768245                   |
| cg02016771 | ABCG2       | 4   | 8.89E-05   | 0.523260066                    | 0.633830379                   |
| cg15895268 | ABL2;ABL2;A | 1   | 0.00507628 | 0.35297614                     | 0.46910819                    |
| cg06539091 | ABLIM1;ABLI | 10  | 8.81E-06   | 0.446946527                    | 0.611526904                   |
| cg02068171 | ABLIM1;ABLI | 10  | 2.33E-06   | 0.247054297                    | 0.350108355                   |
| cg23928713 | ABLIM2;ABLI | 4   | 3.58E-16   | 0.296206406                    | 0.534453663                   |
| cg19635501 | ABLIM2;ABLI | 4   | 6.76E-06   | 0.414743427                    | 0.536196129                   |
| cg04318619 | ABR;ABR     | 17  | 0.0002042  | 0.174786452                    | 0.298502774                   |
| cg03003335 | ACAP3       | 1   | 0.00174378 | 0.308898413                    | 0.421257006                   |
| cg03734783 | ACCN3;ACCN  | 7   | 3.49E-06   | 0.475684483                    | 0.615179888                   |
| cg02812142 | ACMSD       | 2   | 3.09E-10   | 0.463544725                    | 0.631718484                   |
| cg24096680 | ACOX1;FBF1; | 17  | 3.72E-10   | 0.193720398                    | 0.329772851                   |
| cg03977443 | ACSL1       | 4   | 3.90E-09   | 0.289135319                    | 0.40439443                    |
| cg00328597 | ACTN2       | 1   | 2.30E-10   | 0.388844341                    | 0.627355321                   |
| cg18959907 | ACYP2       | 2   | 4.66E-05   | 0.568748553                    | 0.679568938                   |
| cg27158677 | ADAM12;AD,  | 10  | 2.82E-08   | 0.679372575                    | 0.829622294                   |
| cg24166018 | ADAM12;AD,  | 10  | 1.51E-11   | 0.696357601                    | 0.827557757                   |
| cg25238274 | ADAM12;AD,  | 10  | 2.00E-06   | 0.663013542                    | 0.772885821                   |
| cg26826339 | ADAM7       | 8   | 3.30E-05   | 0.174755211                    | 0.275139481                   |
| cg01181233 | ADAMDEC1;,  | 8   | 4.67E-07   | 0.134468866                    | 0.25836206                    |
| cg24030232 | ADAMTS16    | 5   | 0.00016502 | 0.435299277                    | 0.577087105                   |
| cg27344315 | ADAMTS17    | 15  | 4.93E-06   | 0.267020867                    | 0.415159646                   |
| cg27511525 | ADAMTS17    | 15  | 0.00105243 | 0.320996012                    | 0.447914116                   |
| cg13398440 | ADAMTS2;A[  | 5   | 1.56E-07   | 0.773351887                    | 0.878568289                   |
| cg00646084 | ADAMTS5     | 21  | 0.00060525 | 0.473696873                    | 0.619176735                   |
| cg03294207 | ADAMTS5     | 21  | 7.96E-05   | 0.513698903                    | 0.658188263                   |
| cg14740657 | ADAMTS5     | 21  | 0.00154093 | 0.421357447                    | 0.52880733                    |
| cg04711622 | ADAMTS6     | 5   | 0.00013329 | 0.432316069                    | 0.534281857                   |
| cg03213833 | ADARB2      | 10  | 2.60E-09   | 0.362321356                    | 0.573261609                   |
| cg17981439 | ADARB2      | 10  | 6.75E-11   | 0.383834467                    | 0.568215986                   |
| cg02088470 | ADARB2      | 10  | 2.21E-12   | 0.571886656                    | 0.753708277                   |
| cg13504411 | ADARB2      | 10  | 3.64E-08   | 0.488832247                    | 0.644318968                   |
| cg05289540 | ADARB2      | 10  | 4.07E-11   | 0.417453795                    | 0.548249404                   |
| cg14434293 | ADARB2      | 10  | 1.15E-09   | 0.242510721                    | 0.359888076                   |
| cg17023203 | ADARB2      | 10  | 0.04607669 | 0.380061891                    | 0.492393975                   |

|            |             |    |            |             |             |
|------------|-------------|----|------------|-------------|-------------|
| cg04271617 | ADARB2      | 10 | 0.00010607 | 0.566982773 | 0.678184399 |
| cg15531433 | ADARB2      | 10 | 4.49E-06   | 0.318994324 | 0.42775661  |
| cg17221993 | ADARB2      | 10 | 4.85E-09   | 0.517887722 | 0.626158649 |
| cg19533322 | ADARB2      | 10 | 6.70E-06   | 0.70271905  | 0.804767857 |
| cg14908653 | ADCYAP1;AD  | 18 | 7.35E-06   | 0.29329712  | 0.43686189  |
| cg22039638 | ADD2;ADD2;  | 2  | 0.00057398 | 0.38255033  | 0.495769333 |
| cg20180050 | ADHFE1      | 8  | 0.00097892 | 0.401829806 | 0.504460517 |
| cg06864391 | ADPRHL1     | 13 | 4.04E-08   | 0.668899899 | 0.792746997 |
| cg01810471 | ADPRHL1;AD  | 13 | 2.03E-06   | 0.520899714 | 0.626185682 |
| cg01477835 | AFF1;AFF1   | 4  | 0.00193259 | 0.455750874 | 0.568836122 |
| cg22123885 | AGAP1;AGAF  | 2  | 0.00014024 | 0.703382572 | 0.817052053 |
| cg10647547 | AGAP1;AGAF  | 2  | 1.95E-07   | 0.606503288 | 0.709037218 |
| cg09596958 | AGAP2;AGAF  | 12 | 0.00022237 | 0.215003046 | 0.318025835 |
| cg02143743 | AGBL1       | 15 | 0.00215924 | 0.471678306 | 0.611644173 |
| cg22017303 | AGL;AGL;AGI | 1  | 0.02154253 | 0.545107772 | 0.687937333 |
| cg01395754 | AGPS        | 2  | 1.48E-05   | 0.499302516 | 0.631896845 |
| cg17483792 | AHCYL2;AHC  | 7  | 2.10E-06   | 0.62419869  | 0.733603383 |
| cg24064903 | AHRR;LOC10  | 5  | 1.34E-12   | 0.632571345 | 0.767330547 |
| cg02385153 | AHRR;LOC10  | 5  | 2.75E-10   | 0.462300476 | 0.588873822 |
| cg14006239 | AIF1L       | 9  | 1.13E-05   | 0.49189537  | 0.607642258 |
| cg00859330 | AJAP1;AJAP1 | 1  | 1.52E-07   | 0.362655034 | 0.522004128 |
| cg10400362 | AJAP1;AJAP1 | 1  | 4.18E-11   | 0.465324197 | 0.623561681 |
| cg11926510 | AJAP1;AJAP1 | 1  | 5.64E-05   | 0.565387791 | 0.681500674 |
| cg00691586 | AKAP13;AKA  | 15 | 9.45E-06   | 0.48878288  | 0.623437862 |
| cg02248514 | AKAP6       | 14 | 4.27E-08   | 0.603471609 | 0.716126702 |
| cg02004048 | AKD1        | 6  | 4.12E-06   | 0.613925453 | 0.773509379 |
| cg12001930 | AKR1B10     | 7  | 2.35E-09   | 0.452270921 | 0.565453041 |
| cg25171118 | AKR1B10;AKI | 7  | 4.80E-15   | 0.419975733 | 0.652164246 |
| cg26862316 | AKT2        | 19 | 3.39E-07   | 0.652610066 | 0.776035678 |
| cg13241645 | ALAS1;ALAS1 | 3  | 1.00E-10   | 0.30569673  | 0.458963115 |
| cg27089736 | ALLC        | 2  | 3.51E-08   | 0.72377609  | 0.829626363 |
| cg06809252 | ALX3        | 1  | 7.44E-06   | 0.394501125 | 0.501970427 |
| cg22327527 | AMPH;AMPH   | 7  | 7.06E-08   | 0.329043383 | 0.467498082 |
| cg23092449 | AMPH;AMPH   | 7  | 2.91E-07   | 0.22896755  | 0.339091329 |
| cg20490392 | ANGPT2;ANG  | 8  | 1.51E-09   | 0.3182723   | 0.498687072 |
| cg04017131 | ANGPT2;ANG  | 8  | 1.64E-10   | 0.183555004 | 0.328015139 |
| cg21193744 | ANGPT2;ANG  | 8  | 0.00085855 | 0.327415924 | 0.442951154 |
| cg27028281 | ANK2;ANK2;  | 4  | 1.93E-09   | 0.454200457 | 0.683568562 |
| cg23246828 | ANK2;ANK2;  | 4  | 6.09E-10   | 0.53284645  | 0.704384462 |
| cg20008164 | ANKFN1      | 17 | 0.00011078 | 0.485789108 | 0.586501578 |
| cg05850869 | ANKLE2      | 12 | 1.67E-05   | 0.508818202 | 0.637411259 |
| cg21729214 | ANKLE2      | 12 | 4.10E-05   | 0.396943498 | 0.518289233 |
| cg26515084 | ANKLE2      | 12 | 7.50E-06   | 0.431989857 | 0.539043    |
| cg05015495 | ANKRD32     | 5  | 0.00033164 | 0.520216734 | 0.625793444 |
| cg23162479 | ANO2        | 12 | 1.97E-15   | 0.178421815 | 0.360450133 |
| cg00363845 | ANO8        | 19 | 2.43E-05   | 0.42631095  | 0.538064991 |

|            |              |    |            |             |             |
|------------|--------------|----|------------|-------------|-------------|
| cg04329351 | ANXA11;ANX   | 10 | 0.00168768 | 0.23022057  | 0.330228838 |
| cg07200421 | ANXA13;ANX   | 8  | 8.62E-11   | 0.36271449  | 0.559569238 |
| cg25825810 | ANXA13;ANX   | 8  | 5.70E-06   | 0.621815754 | 0.762754324 |
| cg11749792 | ANXA13;ANX   | 8  | 2.44E-06   | 0.605516309 | 0.745160947 |
| cg00283535 | ANXA13;ANX   | 8  | 9.71E-05   | 0.557112556 | 0.680774582 |
| cg25099065 | ANXA4        | 2  | 2.00E-09   | 0.163058572 | 0.298914425 |
| cg13937817 | APBA1        | 9  | 3.85E-07   | 0.600491484 | 0.747738554 |
| cg22135269 | APBA2;APBA   | 15 | 2.99E-09   | 0.203944616 | 0.364342015 |
| cg22874989 | APBA2;APBA   | 15 | 2.33E-10   | 0.333819444 | 0.4657774   |
| cg26896979 | APITD1;APITI | 1  | 4.80E-09   | 0.232935765 | 0.413161424 |
| cg19333614 | APOBEC3F     | 22 | 1.58E-12   | 0.584952636 | 0.732354845 |
| cg01949403 | APOL3;APOL   | 22 | 7.71E-14   | 0.580268226 | 0.75416937  |
| cg17657707 | ARFGF2       | 20 | 0.00099249 | 0.27892494  | 0.390907259 |
| cg17592268 | ARHGAP15     | 2  | 5.75E-18   | 0.217195671 | 0.512047915 |
| cg02012721 | ARHGAP26;A   | 5  | 0.00263889 | 0.452059228 | 0.562269914 |
| cg23902994 | ARHGEF10     | 8  | 3.30E-05   | 0.486406548 | 0.618174655 |
| cg10020040 | ARHGEF16     | 1  | 3.66E-08   | 0.332140403 | 0.437333061 |
| cg18599155 | ARL8B        | 3  | 1.26E-12   | 0.215351326 | 0.386301102 |
| cg15527231 | ARMC4        | 10 | 0.00064817 | 0.346666623 | 0.489509717 |
| cg19140602 | ARMC4        | 10 | 0.00695564 | 0.314353948 | 0.436866943 |
| cg15647584 | ARNT2        | 15 | 1.51E-09   | 0.4116525   | 0.567432167 |
| cg16370778 | ARPP-21;ARF  | 3  | 2.26E-07   | 0.475572709 | 0.646230876 |
| cg11442052 | ARPP-21;ARF  | 3  | 3.81E-07   | 0.389254806 | 0.559256733 |
| cg20582941 | ARPP-21;ARF  | 3  | 7.19E-11   | 0.197364866 | 0.38339762  |
| cg07799299 | ASAP1        | 8  | 0.00497774 | 0.47504287  | 0.575107429 |
| cg05277504 | ASPSCR1      | 17 | 0.00159011 | 0.337469348 | 0.438703344 |
| cg00977707 | ATG7;ATG7;A  | 3  | 0.00094479 | 0.451164781 | 0.56664079  |
| cg02543268 | ATP10B       | 5  | 5.40E-07   | 0.538302777 | 0.684728559 |
| cg07149639 | ATP11A;ATP   | 13 | 4.61E-05   | 0.555117009 | 0.755494809 |
| cg08889347 | ATP13A4      | 3  | 0.00043192 | 0.518327168 | 0.628388351 |
| cg25013044 | ATP13A5      | 3  | 2.26E-06   | 0.604496905 | 0.707663346 |
| cg10095954 | ATP2A3;ATP   | 17 | 0.00062403 | 0.243550315 | 0.344384514 |
| cg01948978 | ATP2B4;ATP   | 1  | 1.17E-08   | 0.284381197 | 0.416964474 |
| cg13048147 | ATP5H;ATP5I  | 17 | 3.29E-06   | 0.320750402 | 0.42467099  |
| cg16376770 | ATP6VOA2     | 12 | 2.13E-08   | 0.396172514 | 0.536732155 |
| cg20186907 | ATXN7L1;AT   | 7  | 0.00077024 | 0.392971229 | 0.493950645 |
| cg10931900 | AVPR1A       | 12 | 1.02E-07   | 0.21278418  | 0.379512227 |
| cg12807275 | AVPR1A       | 12 | 0.00171716 | 0.613417417 | 0.722426346 |
| cg26706003 | AVPR1A;AVP   | 12 | 1.06E-06   | 0.232010623 | 0.350005333 |
| cg26912485 | B3GAT1;B3G   | 11 | 1.04E-09   | 0.583627048 | 0.727365646 |
| cg00985958 | B3GAT2       | 6  | 0.00072006 | 0.508948151 | 0.616895402 |
| cg24238356 | B4GALNT2;B   | 17 | 0.00014707 | 0.339907575 | 0.446211993 |
| cg05715751 | BAHCC1       | 17 | 1.11E-09   | 0.28746726  | 0.445617803 |
| cg24573321 | BAI3         | 6  | 0.03422229 | 0.615898837 | 0.719040854 |
| cg08595782 | BANP;BANP    | 16 | 0.00010349 | 0.597481491 | 0.724901636 |
| cg06071058 | BARX1        | 9  | 1.43E-11   | 0.196335412 | 0.38010142  |

|            |             |    |            |             |             |
|------------|-------------|----|------------|-------------|-------------|
| cg13773631 | BARX1       | 9  | 1.36E-08   | 0.187931944 | 0.32078219  |
| cg21079591 | BAT1;BAT1   | 6  | 0.00577899 | 0.543506414 | 0.654065873 |
| cg13619623 | BBS9;BBS9;B | 7  | 0.00328926 | 0.376183859 | 0.488284914 |
| cg15502231 | BCAP29;BCA  | 7  | 0.00084347 | 0.201589748 | 0.310089289 |
| cg01934781 | BCL2L14;BCL | 12 | 1.32E-05   | 0.239352787 | 0.364818889 |
| cg19798702 | BDH1;BDH1;  | 3  | 0.00024194 | 0.447248418 | 0.561318908 |
| cg07238832 | BDNF;BDNF;  | 11 | 8.25E-06   | 0.589679895 | 0.700336195 |
| cg27661315 | BEND4;BEND  | 4  | 1.28E-12   | 0.182611244 | 0.360543991 |
| cg22097249 | BEND4;BEND  | 4  | 1.62E-13   | 0.190506489 | 0.364882037 |
| cg22745397 | BEND4;BEND  | 4  | 3.86E-11   | 0.145445588 | 0.254189789 |
| cg08745451 | BEND6       | 6  | 2.05E-10   | 0.138281273 | 0.252612264 |
| cg02023138 | BIN2        | 12 | 6.54E-06   | 0.429548687 | 0.558164335 |
| cg00576435 | BLCAP;BLCAF | 20 | 8.42E-06   | 0.458902815 | 0.620075057 |
| cg18433380 | BLCAP;BLCAF | 20 | 7.10E-05   | 0.477874888 | 0.630244512 |
| cg22510412 | BLCAP;BLCAF | 20 | 0.0018667  | 0.650465271 | 0.800058806 |
| cg03061677 | BLCAP;BLCAF | 20 | 5.93E-05   | 0.403821809 | 0.545769695 |
| cg15473473 | BLCAP;BLCAF | 20 | 0.00078489 | 0.481689081 | 0.613056497 |
| cg20479660 | BLCAP;BLCAF | 20 | 0.00074793 | 0.477189506 | 0.600020875 |
| cg01466133 | BLCAP;BLCAF | 20 | 0.02754184 | 0.595664203 | 0.710219395 |
| cg17643025 | BLCAP;BLCAF | 20 | 0.00511309 | 0.62302575  | 0.737311208 |
| cg21588305 | BLCAP;NNAT  | 20 | 0.01288977 | 0.575933766 | 0.686419213 |
| cg05912481 | BMPER       | 7  | 0.00010514 | 0.566806137 | 0.693385098 |
| cg23741520 | BNC1        | 15 | 3.99E-10   | 0.280840599 | 0.416326039 |
| cg10275315 | BNC1        | 15 | 1.14E-11   | 0.328755436 | 0.440222016 |
| cg13471735 | BNC2        | 9  | 0.00089444 | 0.252680702 | 0.355952561 |
| cg25191983 | BNIP3L      | 8  | 0.00107013 | 0.526099784 | 0.629979466 |
| cg02935097 | BRDT        | 1  | 0.02682214 | 0.638656214 | 0.738929639 |
| cg11843333 | BST1        | 4  | 1.14E-05   | 0.190701707 | 0.291328804 |
| cg01584389 | BTNL2       | 6  | 0.0006353  | 0.46873082  | 0.577751786 |
| cg05355436 | C10orf107   | 10 | 9.23E-05   | 0.221114485 | 0.339025354 |
| cg11914795 | C10orf107   | 10 | 0.00016679 | 0.167733269 | 0.273151894 |
| cg05496768 | C10orf11    | 10 | 0.00111066 | 0.573385317 | 0.697315179 |
| cg20125920 | C10orf140   | 10 | 0.00427331 | 0.462556048 | 0.599210789 |
| cg19472590 | C10orf2;C10 | 10 | 8.71E-05   | 0.482227404 | 0.584264976 |
| cg26744079 | C10orf41;C1 | 10 | 1.14E-06   | 0.652485932 | 0.75591783  |
| cg24842260 | C10orf41;C1 | 10 | 9.94E-06   | 0.275843276 | 0.379242767 |
| cg15891358 | C10orf90    | 10 | 4.84E-05   | 0.59518562  | 0.695503032 |
| cg07371029 | C10orf93    | 10 | 5.39E-06   | 0.576120209 | 0.684561569 |
| cg18033092 | C11orf49;C1 | 11 | 2.03E-05   | 0.502775106 | 0.603251066 |
| cg21770436 | C11orf75    | 11 | 1.26E-07   | 0.205146392 | 0.330287537 |
| cg18076842 | C11orf75    | 11 | 4.39E-07   | 0.184799832 | 0.303569766 |
| cg10338785 | C11orf93    | 11 | 6.23E-05   | 0.325928429 | 0.466550356 |
| cg05582340 | C12orf52    | 12 | 2.96E-06   | 0.553209482 | 0.66800786  |
| cg19115204 | C12orf56;C1 | 12 | 1.85E-06   | 0.289156002 | 0.397293476 |
| cg01756536 | C13orf36    | 13 | 7.35E-06   | 0.188584032 | 0.309315461 |
| cg08149459 | C14orf166B  | 14 | 1.14E-10   | 0.557061293 | 0.733863885 |

|            |               |    |            |             |             |
|------------|---------------|----|------------|-------------|-------------|
| cg10321119 | C14orf179;C:  | 14 | 0.00097329 | 0.372821537 | 0.483026053 |
| cg25066134 | C14orf38      | 14 | 1.90E-12   | 0.302777086 | 0.495552896 |
| cg03950873 | C14orf38      | 14 | 3.66E-08   | 0.268796588 | 0.410798032 |
| cg07484220 | C16orf35;C1f  | 16 | 0.00017001 | 0.555976314 | 0.663288547 |
| cg09596762 | C16orf62      | 16 | 2.35E-05   | 0.212591644 | 0.344785554 |
| cg08210637 | C16orf80      | 16 | 7.10E-10   | 0.590091035 | 0.707947659 |
| cg26930078 | C17orf53;C1:  | 17 | 4.31E-11   | 0.230998942 | 0.365849713 |
| cg25481999 | C18orf2;C18c  | 18 | 1.60E-08   | 0.180565769 | 0.307369818 |
| cg18827787 | C18orf20      | 18 | 1.48E-07   | 0.452024208 | 0.574906049 |
| cg08240592 | C1orf107      | 1  | 7.66E-11   | 0.417556227 | 0.527347553 |
| cg11338033 | C1orf109      | 1  | 0.00093253 | 0.455728926 | 0.581981345 |
| cg11809614 | C1orf156      | 1  | 0.00060452 | 0.584511313 | 0.733991863 |
| cg15461340 | C1orf186;C1c  | 1  | 1.42E-07   | 0.643955872 | 0.765843388 |
| cg11814539 | C1orf228      | 1  | 2.70E-06   | 0.574582374 | 0.738566862 |
| cg19729188 | C1orf52;C1oi  | 1  | 0.00077186 | 0.305352818 | 0.409930522 |
| cg04244851 | C1orf56;BNIF  | 1  | 4.37E-05   | 0.594096096 | 0.749483722 |
| cg26287609 | C20orf173;C:  | 20 | 1.54E-08   | 0.488434451 | 0.633998617 |
| cg05054998 | C21orf70      | 21 | 1.68E-05   | 0.206877138 | 0.327909898 |
| cg00669760 | C2orf34       | 2  | 0.00059812 | 0.394831168 | 0.4971503   |
| cg10481134 | C2orf58       | 2  | 0.00589214 | 0.272155958 | 0.378180339 |
| cg11552853 | C2orf61;C2oi  | 2  | 7.65E-12   | 0.54562906  | 0.717782276 |
| cg12305798 | C2orf84       | 2  | 0.00115409 | 0.397543622 | 0.549946253 |
| cg20000847 | C3orf21       | 3  | 9.02E-10   | 0.465907004 | 0.714404267 |
| cg13868855 | C3orf21       | 3  | 1.45E-12   | 0.379029994 | 0.576946621 |
| cg07250128 | C3orf21       | 3  | 1.51E-12   | 0.35760576  | 0.553777432 |
| cg11732673 | C3orf26;FILIF | 3  | 0.00017378 | 0.534986558 | 0.655934169 |
| cg02766680 | C3orf35;C3oi  | 3  | 1.50E-05   | 0.687489476 | 0.798579739 |
| cg00957698 | C4orf31       | 4  | 1.34E-06   | 0.137368642 | 0.247413895 |
| cg01278041 | C4orf38       | 4  | 0.00504151 | 0.484266453 | 0.596349804 |
| cg01983248 | C5orf28       | 5  | 0.00022102 | 0.26747513  | 0.37308536  |
| cg15016062 | C5orf36       | 5  | 0.00015345 | 0.361788071 | 0.485029451 |
| cg20966357 | C6orf10       | 6  | 7.77E-05   | 0.513260173 | 0.643879577 |
| cg06545464 | C6orf10       | 6  | 1.17E-06   | 0.557197894 | 0.679134105 |
| cg15601361 | C6orf105;C6c  | 6  | 2.34E-08   | 0.230870266 | 0.387071348 |
| cg25658884 | C6orf163;C6c  | 6  | 2.62E-06   | 0.24495906  | 0.357013799 |
| cg18770076 | C6orf176;C6c  | 6  | 8.34E-08   | 0.575798593 | 0.809663201 |
| cg20673819 | C6orf176;C6c  | 6  | 3.59E-11   | 0.539626947 | 0.699913202 |
| cg06646780 | C6orf191      | 6  | 2.64E-07   | 0.290398795 | 0.429149337 |
| cg00647262 | C6orf35       | 6  | 7.93E-08   | 0.259324845 | 0.3689283   |
| cg04841607 | C7orf33       | 7  | 0.0009552  | 0.320835404 | 0.436125292 |
| cg12668043 | C7orf33;C7oi  | 7  | 1.70E-18   | 0.15461322  | 0.497765059 |
| cg26866014 | C7orf33;C7oi  | 7  | 2.52E-09   | 0.324609349 | 0.576436295 |
| cg24772001 | C7orf33;C7oi  | 7  | 1.07E-08   | 0.643979268 | 0.824961893 |
| cg04291970 | C8orf12       | 8  | 8.81E-11   | 0.325287261 | 0.505655037 |
| cg17047033 | C8orf34       | 8  | 0.00330091 | 0.43299787  | 0.541763016 |
| cg14414873 | C9orf152      | 9  | 4.36E-13   | 0.259054975 | 0.504954183 |

|            |                   |    |            |             |             |
|------------|-------------------|----|------------|-------------|-------------|
| cg09596614 | C9orf152;C9orf173 | 9  | 2.24E-13   | 0.162591102 | 0.342191041 |
| cg14417067 | C9orf173          | 9  | 0.00087865 | 0.281100913 | 0.384529602 |
| cg21218957 | CAB39L;CABP2      | 13 | 0.00037045 | 0.250841618 | 0.365468759 |
| cg15044322 | CABP2;CABP1       | 11 | 8.32E-10   | 0.477516342 | 0.62581057  |
| cg03825234 | CACNA1H;CACNA2D3  | 16 | 5.29E-08   | 0.492504721 | 0.624457197 |
| cg09249980 | CACNA1H;CACNA2D3  | 16 | 1.69E-10   | 0.529397364 | 0.637023208 |
| cg03364832 | CACNA2D3          | 3  | 2.88E-12   | 0.292122744 | 0.542905803 |
| cg10791541 | CACNA2D3          | 3  | 2.38E-05   | 0.473636042 | 0.604375252 |
| cg07806361 | CACNA2D3          | 3  | 0.00017266 | 0.561159219 | 0.677918457 |
| cg21506819 | CACNA2D3          | 3  | 0.00011924 | 0.537976808 | 0.64460104  |
| cg23517752 | CACNA2D4          | 12 | 1.38E-08   | 0.333059899 | 0.445319445 |
| cg03237431 | CACNG1            | 17 | 9.60E-12   | 0.374007009 | 0.583145457 |
| cg03455765 | CADM2;CADM1       | 3  | 0.00262339 | 0.439849105 | 0.545102731 |
| cg17149019 | CADPS;CADP        | 3  | 1.29E-16   | 0.434374012 | 0.616515644 |
| cg00653041 | CADPS2;CADPS      | 7  | 0.00098182 | 0.715186465 | 0.822414079 |
| cg25496680 | CALR3             | 19 | 1.37E-07   | 0.280516963 | 0.402594236 |
| cg15484597 | CAMTA1            | 1  | 0.01381687 | 0.279562258 | 0.381293467 |
| cg00260012 | CAPN13            | 2  | 5.69E-13   | 0.362807327 | 0.600641307 |
| cg02203336 | CAPN13            | 2  | 5.25E-11   | 0.539808841 | 0.730870897 |
| cg20423781 | CAPN13            | 2  | 1.37E-08   | 0.602284435 | 0.780298409 |
| cg03470939 | CAPZB             | 1  | 1.33E-06   | 0.568229142 | 0.707242719 |
| cg08404546 | CARD10            | 22 | 1.19E-06   | 0.588622349 | 0.778334766 |
| cg10009968 | CARD11            | 7  | 3.87E-07   | 0.537224957 | 0.693994624 |
| cg09077096 | CARD11            | 7  | 0.00010911 | 0.491904696 | 0.64589135  |
| cg05412410 | CARD11            | 7  | 0.0003547  | 0.370460072 | 0.488652213 |
| cg13128596 | CASP4             | 11 | 4.22E-11   | 0.333668947 | 0.486850982 |
| cg07985864 | CASZ1;CASZ1       | 1  | 3.14E-08   | 0.324629168 | 0.430278669 |
| cg27373591 | CBLN2             | 18 | 3.18E-05   | 0.326078308 | 0.447839093 |
| cg06335372 | CCDC13            | 3  | 2.81E-11   | 0.540192494 | 0.704733918 |
| cg13695746 | CCDC3             | 10 | 0.00051085 | 0.27544753  | 0.380339819 |
| cg09339156 | CCDC42B           | 12 | 1.18E-08   | 0.267612792 | 0.406654601 |
| cg04531363 | CCDC46;CCDC42B    | 17 | 1.18E-05   | 0.390360781 | 0.557601861 |
| cg04098763 | CCDC57            | 17 | 3.17E-07   | 0.520221569 | 0.663619657 |
| cg16920238 | CCDC57            | 17 | 4.04E-06   | 0.509340924 | 0.630357202 |
| cg17348388 | CCDC63            | 12 | 2.57E-09   | 0.222755232 | 0.328092815 |
| cg20272205 | CCDC80;CCDC42B    | 3  | 2.25E-06   | 0.442097554 | 0.565694917 |
| cg18864926 | CCDC85C           | 14 | 0.00067526 | 0.415568752 | 0.519222121 |
| cg05768403 | CCDC90A           | 6  | 6.29E-12   | 0.139941277 | 0.259499994 |
| cg15928132 | CCKAR             | 4  | 1.54E-06   | 0.305718849 | 0.461839161 |
| cg24074177 | CCKAR             | 4  | 1.17E-08   | 0.258260287 | 0.384565053 |
| cg14391016 | CCR6              | 6  | 7.27E-10   | 0.538712766 | 0.674335946 |
| cg24432768 | CD1D              | 1  | 0.0008489  | 0.37080733  | 0.471008601 |
| cg06801676 | CD59;CD59;CD59    | 11 | 9.54E-06   | 0.258272469 | 0.386053746 |
| cg20442536 | CD96;ZBED2;       | 3  | 2.78E-09   | 0.449726045 | 0.674670766 |
| cg13331542 | CDC42EP5          | 19 | 0.0001995  | 0.419008619 | 0.539924548 |
| cg18748085 | CDH12             | 5  | 3.67E-08   | 0.668480022 | 0.801114863 |

|            |             |    |            |             |             |
|------------|-------------|----|------------|-------------|-------------|
| cg11152825 | CDH22       | 20 | 5.53E-06   | 0.573383567 | 0.718520725 |
| cg12589798 | CDH22       | 20 | 0.00017988 | 0.389830321 | 0.496098741 |
| cg08999070 | CDH22       | 20 | 0.0011122  | 0.421026217 | 0.521556989 |
| cg10919204 | CDH6        | 5  | 5.48E-05   | 0.371243765 | 0.47549996  |
| cg19475870 | CDH9;CDH9   | 5  | 4.33E-06   | 0.367479344 | 0.484779074 |
| cg15830572 | CDK11B;CDK  | 1  | 0.01115472 | 0.37722592  | 0.479930807 |
| cg06962787 | CDRT1;CDRT  | 17 | 0.00028353 | 0.188998845 | 0.297741191 |
| cg06726231 | CECR1;CECR1 | 22 | 2.23E-09   | 0.253897938 | 0.400059733 |
| cg22041712 | CENPF       | 1  | 1.41E-08   | 0.232013693 | 0.374562674 |
| cg14024321 | CENPP;ECM2  | 9  | 2.26E-06   | 0.675051927 | 0.775906456 |
| cg16167050 | CEP170;CEP1 | 1  | 1.16E-08   | 0.466344064 | 0.627820365 |
| cg07981495 | CGA;CGA     | 6  | 2.48E-05   | 0.557774363 | 0.694168446 |
| cg07111861 | CGNL1       | 15 | 4.95E-06   | 0.589609202 | 0.704634466 |
| cg25408620 | CHCHD2      | 7  | 5.82E-05   | 0.3672986   | 0.510085038 |
| cg07050692 | CHD7        | 8  | 2.12E-07   | 0.637870176 | 0.80925578  |
| cg09941713 | CHD7        | 8  | 0.00011941 | 0.246685059 | 0.380108638 |
| cg09232918 | CHD9        | 16 | 1.74E-06   | 0.671720052 | 0.784079245 |
| cg04770195 | CHD9        | 16 | 0.00272298 | 0.2925754   | 0.396116402 |
| cg07414525 | CHL1        | 3  | 4.31E-05   | 0.340609228 | 0.442967291 |
| cg26585590 | CHN1;CHN1   | 2  | 6.31E-06   | 0.547751505 | 0.692232707 |
| cg16057587 | CHRM2;CHRI  | 7  | 1.08E-05   | 0.497480773 | 0.603235198 |
| cg22670733 | CHRNA3;CHF  | 15 | 4.17E-14   | 0.281334107 | 0.499504653 |
| cg16570223 | CHRNA3;CHF  | 15 | 5.54E-11   | 0.357506666 | 0.53460113  |
| cg19993258 | CHRNA3;CHF  | 15 | 1.61E-13   | 0.437142652 | 0.582062483 |
| cg09353345 | CHRN4       | 15 | 1.55E-11   | 0.554326794 | 0.76110793  |
| cg14232082 | CHSY1       | 15 | 6.44E-11   | 0.278560694 | 0.3903413   |
| cg12642717 | CIDEA;CIDEA | 18 | 9.49E-05   | 0.412219385 | 0.524051362 |
| cg00293996 | CLDN14;CLDI | 21 | 1.88E-12   | 0.36391712  | 0.559055757 |
| cg23716866 | CLIC5       | 6  | 2.13E-08   | 0.413119106 | 0.606422066 |
| cg03797957 | CLP1;CLP1   | 11 | 3.44E-10   | 0.278113282 | 0.456446351 |
| cg15807314 | CLYBL       | 13 | 2.14E-09   | 0.263831385 | 0.403921627 |
| cg18695543 | CLYBL       | 13 | 6.31E-10   | 0.320725916 | 0.440726105 |
| cg08020808 | CMA1        | 14 | 1.13E-06   | 0.205821738 | 0.318771697 |
| cg20471562 | CNGA3;CNGA  | 2  | 0.00045012 | 0.474722108 | 0.585652203 |
| cg05882745 | CNGA4       | 11 | 2.25E-05   | 0.512740258 | 0.640885561 |
| cg06694589 | CNNM2;CNN   | 10 | 6.60E-08   | 0.530130893 | 0.678472196 |
| cg16139517 | CNTN4       | 3  | 1.81E-09   | 0.425830197 | 0.607649541 |
| cg16907496 | CNTN4;CNTN  | 3  | 1.43E-06   | 0.58084577  | 0.685947349 |
| cg13916117 | CNTN4;CNTN  | 3  | 7.87E-08   | 0.448064815 | 0.579035504 |
| cg18746719 | CNTN5;CNTN  | 11 | 8.26E-05   | 0.260568401 | 0.392639359 |
| cg06822340 | CNTNAP2     | 7  | 2.90E-08   | 0.126318643 | 0.25875549  |
| cg17727071 | COBL        | 7  | 0.01460998 | 0.453320006 | 0.562170402 |
| cg18315763 | COL14A1     | 8  | 0.00097892 | 0.358797806 | 0.462194091 |
| cg16930728 | COL22A1     | 8  | 5.13E-08   | 0.269460517 | 0.376032951 |
| cg25554212 | COL23A1     | 5  | 5.00E-06   | 0.280204235 | 0.435609826 |
| cg08354401 | COL23A1     | 5  | 7.58E-08   | 0.3312153   | 0.478261281 |

|            |             |    |            |             |             |
|------------|-------------|----|------------|-------------|-------------|
| cg06485308 | COL23A1     | 5  | 1.39E-07   | 0.42370954  | 0.558196798 |
| cg23075480 | COL23A1     | 5  | 3.88E-07   | 0.533695291 | 0.653593623 |
| cg08862479 | COL23A1     | 5  | 0.00014945 | 0.445277874 | 0.565026506 |
| cg23336321 | COL23A1     | 5  | 8.07E-06   | 0.573870599 | 0.682523019 |
| cg07729453 | COL23A1     | 5  | 1.77E-07   | 0.518005149 | 0.618163028 |
| cg13910071 | COL27A1     | 9  | 2.77E-09   | 0.695104341 | 0.809444082 |
| cg06003429 | COL6A3;COLI | 2  | 8.26E-10   | 0.430462581 | 0.627164132 |
| cg18516150 | CPA3        | 3  | 2.53E-13   | 0.351725092 | 0.596091992 |
| cg12389356 | CPE         | 4  | 0.00059397 | 0.413557459 | 0.514898527 |
| cg26565719 | CPEB1       | 15 | 2.24E-05   | 0.372114187 | 0.480984251 |
| cg06525453 | CPT2        | 1  | 3.00E-05   | 0.360125075 | 0.479448503 |
| cg11592640 | CRABP1      | 15 | 7.45E-08   | 0.412288576 | 0.577547502 |
| cg08317694 | CRABP1      | 15 | 1.11E-08   | 0.518803743 | 0.6292232   |
| cg05723179 | CREB3L2     | 7  | 9.34E-08   | 0.367104769 | 0.499672212 |
| cg16756589 | CREB5;CREB5 | 7  | 5.02E-08   | 0.206732751 | 0.339413342 |
| cg22321985 | CREBBP;CREB | 16 | 0.00337957 | 0.542202556 | 0.644528616 |
| cg03073714 | CRY1        | 12 | 3.97E-05   | 0.378521758 | 0.547805994 |
| cg20193872 | CRY1        | 12 | 6.21E-09   | 0.245892246 | 0.375867092 |
| cg07313720 | CRYGA       | 2  | 3.20E-06   | 0.301116012 | 0.450234201 |
| cg00139726 | CRYGA       | 2  | 1.97E-08   | 0.195571219 | 0.340929157 |
| cg22386774 | CRYGA       | 2  | 8.84E-11   | 0.169874531 | 0.290667142 |
| cg19855215 | CRYGB       | 2  | 1.20E-09   | 0.354962038 | 0.482803246 |
| cg20018812 | CRYGB       | 2  | 4.19E-05   | 0.40699226  | 0.534080473 |
| cg17314180 | CRYGB       | 2  | 1.76E-07   | 0.499407278 | 0.622242315 |
| cg20912923 | CSMD1       | 8  | 3.26E-10   | 0.463890155 | 0.656420432 |
| cg00332689 | CSMD1       | 8  | 0.00016419 | 0.440481226 | 0.58952848  |
| cg26852625 | CSMD1       | 8  | 4.85E-09   | 0.606334268 | 0.740457158 |
| cg21896766 | CSMD3;CSMI  | 8  | 1.26E-12   | 0.137443989 | 0.356087817 |
| cg24759795 | CSMD3;CSMI  | 8  | 7.49E-13   | 0.111148548 | 0.276012432 |
| cg21029901 | CSNK1A1P    | 15 | 1.72E-10   | 0.360435961 | 0.539645979 |
| cg15428496 | CTDSPL;CTDS | 3  | 0.00126386 | 0.279243564 | 0.387516923 |
| cg04787317 | CTDSPL;CTDS | 3  | 0.00024738 | 0.288469902 | 0.417340799 |
| cg16516490 | CTSK        | 1  | 3.66E-09   | 0.131350587 | 0.270952404 |
| cg06515461 | CUGBP2;CUG  | 10 | 2.95E-09   | 0.471666923 | 0.602124223 |
| cg17148755 | CUX1;CUX1;( | 7  | 4.91E-05   | 0.446625743 | 0.605476973 |
| cg05258123 | CUX1;CUX1;( | 7  | 0.00167738 | 0.403561689 | 0.536818976 |
| cg08944961 | CUX2        | 12 | 6.99E-08   | 0.290718193 | 0.4744967   |
| cg11580090 | CYB5R1      | 1  | 6.35E-07   | 0.729364568 | 0.831172709 |
| cg02162897 | CYP1B1      | 2  | 0.00014303 | 0.501554744 | 0.707777448 |
| cg20408276 | CYP1B1      | 2  | 0.0010229  | 0.510234004 | 0.679185823 |
| cg01462727 | CYP24A1;CYF | 20 | 4.52E-16   | 0.256031181 | 0.440266231 |
| cg00287413 | CYP24A1;CYF | 20 | 4.95E-06   | 0.4792981   | 0.626676793 |
| cg04899273 | CYP2C18;CYF | 10 | 1.89E-09   | 0.317438396 | 0.469227447 |
| cg04887030 | CYP2W1      | 7  | 0.00015518 | 0.320649575 | 0.431340514 |
| cg03117577 | CYTSB;CYTSB | 17 | 1.93E-06   | 0.466272706 | 0.573792318 |
| cg21637761 | CYTSB;CYTSB | 17 | 0.00010152 | 0.473376609 | 0.585838792 |



|            |             |    |            |             |             |
|------------|-------------|----|------------|-------------|-------------|
| cg01055518 | DAB1        | 1  | 2.03E-07   | 0.361522107 | 0.500312122 |
| cg18174779 | DAB1        | 1  | 0.00210604 | 0.431626286 | 0.53837693  |
| cg15158891 | DAB1        | 1  | 0.01441578 | 0.559753586 | 0.664853502 |
| cg08103568 | DAPP1       | 4  | 2.94E-07   | 0.504535329 | 0.647151548 |
| cg02208529 | DBN1        | 5  | 1.15E-06   | 0.43951992  | 0.543446171 |
| cg03114573 | DBX2        | 12 | 2.87E-05   | 0.596519441 | 0.723414058 |
| cg18650307 | DCAF16      | 4  | 1.20E-07   | 0.582273824 | 0.70199405  |
| cg13833328 | DCDC2;KAAG  | 6  | 5.42E-06   | 0.4920086   | 0.606503793 |
| cg11972626 | DDX60L      | 4  | 8.96E-05   | 0.429714802 | 0.550370368 |
| cg08379738 | DENND1C     | 19 | 0.0004094  | 0.261639226 | 0.388381349 |
| cg04554613 | DHRS9;DHRS  | 2  | 1.81E-12   | 0.121470293 | 0.249015353 |
| cg04436083 | DHX15       | 4  | 9.16E-06   | 0.661378031 | 0.77400358  |
| cg26495716 | DKFZp566F0! | 19 | 3.55E-09   | 0.340327651 | 0.544597939 |
| cg01120132 | DKFZp566F0! | 19 | 2.45E-10   | 0.267436602 | 0.468058696 |
| cg25432425 | DKFZp566F0! | 19 | 7.79E-08   | 0.372484589 | 0.555699977 |
| cg11341086 | DKFZp566F0! | 19 | 6.60E-07   | 0.458965385 | 0.641432529 |
| cg13786171 | DKFZp566F0! | 19 | 1.91E-11   | 0.18871484  | 0.335203298 |
| cg20985037 | DKFZp566F0! | 19 | 1.04E-07   | 0.303674542 | 0.424717797 |
| cg12507030 | DKFZp566F0! | 19 | 2.69E-07   | 0.551511705 | 0.672321133 |
| cg12121765 | DLC1;DLC1   | 8  | 0.00041133 | 0.299366441 | 0.457752961 |
| cg01070197 | DLC1;DLC1   | 8  | 0.00054334 | 0.470967205 | 0.606284244 |
| cg16099871 | DLC1;DLC1   | 8  | 7.24E-05   | 0.31064618  | 0.435744652 |
| cg01257309 | DLEU7       | 13 | 0.0009142  | 0.62748235  | 0.744933981 |
| cg14093720 | DLGAP1;DLG  | 18 | 2.96E-06   | 0.463403741 | 0.584370621 |
| cg02840179 | DLGAP2      | 8  | 2.74E-08   | 0.45655756  | 0.609193879 |
| cg15230311 | DLGAP2      | 8  | 2.32E-08   | 0.550774352 | 0.67970956  |
| cg02839802 | DMC1        | 22 | 4.31E-11   | 0.255124398 | 0.485223729 |
| cg13122491 | DNAH17      | 17 | 3.71E-11   | 0.51096914  | 0.681679842 |
| cg09336508 | DNAH3       | 16 | 8.01E-14   | 0.433326337 | 0.640516495 |
| cg00576027 | DNAH9       | 17 | 5.09E-08   | 0.631353958 | 0.774201417 |
| cg14928319 | DNAJC5B     | 8  | 1.57E-07   | 0.410972452 | 0.537449052 |
| cg07802362 | DNM3;DNM3   | 1  | 1.77E-10   | 0.46337946  | 0.683829924 |
| cg17075808 | DOCK10      | 2  | 0.00012553 | 0.411359555 | 0.527889745 |
| cg19448644 | DOCK3       | 3  | 4.00E-07   | 0.657547287 | 0.784802785 |
| cg05046083 | DOCK4       | 7  | 0.00481838 | 0.261102424 | 0.369116331 |
| cg15196147 | DOCK4       | 7  | 5.57E-08   | 0.738264995 | 0.842155568 |
| cg25609954 | DOK7;DOK7   | 4  | 5.78E-08   | 0.503460762 | 0.621584687 |
| cg08044294 | DOT1L       | 19 | 5.66E-06   | 0.713969274 | 0.873702686 |
| cg25746387 | DPT         | 1  | 0.00025105 | 0.163296354 | 0.264479769 |
| cg10762047 | DST;DST;DST | 6  | 0.0004814  | 0.517699341 | 0.631481156 |
| cg12875426 | DYM         | 18 | 1.58E-07   | 0.56610522  | 0.743238613 |
| cg06886738 | DYNC1H1     | 14 | 0.00018816 | 0.491938862 | 0.61614334  |
| cg01407254 | DYSF;DYSF;D | 2  | 1.80E-05   | 0.407969384 | 0.554651764 |
| cg01171786 | DYSF;DYSF;D | 2  | 0.00026454 | 0.248305491 | 0.370858031 |
| cg18239431 | EBF2        | 8  | 4.11E-07   | 0.372202065 | 0.485227629 |
| cg16895719 | EBF2        | 8  | 7.47E-07   | 0.280545427 | 0.386997974 |

|            |              |    |            |             |             |
|------------|--------------|----|------------|-------------|-------------|
| cg14855519 | EBF2         | 8  | 4.86E-09   | 0.507532637 | 0.613839834 |
| cg27454298 | EBF3         | 10 | 0.00490401 | 0.575781344 | 0.694702091 |
| cg20399252 | EBPL         | 13 | 0.00045732 | 0.62679868  | 0.79115112  |
| cg00204262 | ECH1         | 19 | 8.72E-08   | 0.342662483 | 0.463057921 |
| cg11380580 | ECHDC2       | 1  | 5.69E-13   | 0.290747191 | 0.462574594 |
| cg27138223 | EDAR         | 2  | 4.29E-10   | 0.185818936 | 0.348155052 |
| cg16203262 | EDNRB        | 13 | 6.56E-05   | 0.34348312  | 0.474259218 |
| cg26138978 | EFNB2        | 13 | 0.00013232 | 0.589020847 | 0.702987642 |
| cg24184792 | EFR3A        | 8  | 0.00010436 | 0.134607704 | 0.235680817 |
| cg18454133 | EFS;EFS      | 14 | 0.00013531 | 0.195514947 | 0.315168394 |
| cg02769614 | EGFL8        | 6  | 0.00735063 | 0.553269742 | 0.671819191 |
| cg10002850 | EGFR;EGFR;E  | 7  | 5.07E-09   | 0.639438107 | 0.771961317 |
| cg19460095 | EHF          | 11 | 5.94E-08   | 0.493366679 | 0.638971643 |
| cg18465149 | EHMT2;EHM    | 6  | 3.53E-11   | 0.608536223 | 0.742780149 |
| cg19682395 | EIF2AK4      | 15 | 7.31E-05   | 0.578186231 | 0.722129192 |
| cg02911270 | EIF2C2;EIF2C | 8  | 7.38E-05   | 0.454531408 | 0.582440631 |
| cg23119628 | EIF2C2;EIF2C | 8  | 5.15E-06   | 0.235868494 | 0.343726458 |
| cg25217583 | ELAVL4;ELAV  | 1  | 4.34E-08   | 0.195475085 | 0.317827936 |
| cg15050051 | ELFN1        | 7  | 6.51E-10   | 0.492254985 | 0.64030805  |
| cg26245202 | ELK4;ELK4    | 1  | 1.58E-12   | 0.235739535 | 0.439285233 |
| cg12324598 | ELL2         | 5  | 0.00621769 | 0.442646679 | 0.547924207 |
| cg16798247 | ELMO1;ELMO   | 7  | 8.84E-13   | 0.335562459 | 0.595026221 |
| cg16324018 | ELMOD3;ELN   | 2  | 8.05E-06   | 0.680534028 | 0.812992363 |
| cg11320318 | ELOVL6;ELOV  | 4  | 3.16E-05   | 0.530444394 | 0.674457554 |
| cg18358136 | EML2         | 19 | 0.00069517 | 0.407722265 | 0.535445529 |
| cg00042059 | EML6         | 2  | 3.04E-14   | 0.238225855 | 0.443414692 |
| cg22109370 | ENGASE       | 17 | 0.00101542 | 0.569428173 | 0.669472315 |
| cg24854430 | ENPP6        | 4  | 0.00039973 | 0.606206822 | 0.720398155 |
| cg01975858 | EPS8         | 12 | 0.00134463 | 0.181741453 | 0.298044967 |
| cg01156373 | ERBB4;ERBB4  | 2  | 0.00032645 | 0.635337902 | 0.737319024 |
| cg13925163 | ERMP1        | 9  | 5.58E-05   | 0.169252741 | 0.277942577 |
| cg01085974 | ESPN         | 1  | 1.56E-11   | 0.528344279 | 0.672650111 |
| cg04063345 | ESR1;ESR1;ES | 6  | 0.00242776 | 0.536445957 | 0.656489537 |
| cg15626350 | ESR1;ESR1;ES | 6  | 0.00445974 | 0.422417898 | 0.536149712 |
| cg06523151 | ESRRG;ESRRG  | 1  | 1.24E-12   | 0.228966745 | 0.470395873 |
| cg22480109 | ESYT2        | 7  | 8.48E-05   | 0.446948066 | 0.58112679  |
| cg15256387 | ETV1;ETV1    | 7  | 2.03E-08   | 0.388626856 | 0.563833417 |
| cg21463790 | ETV1;ETV1;E  | 7  | 2.35E-10   | 0.264808447 | 0.488617242 |
| cg07774251 | EXPH5;EXPH5  | 11 | 4.85E-06   | 0.156935618 | 0.259214644 |
| cg03586412 | EYA2;EYA2    | 20 | 6.27E-09   | 0.503191017 | 0.648433541 |
| cg02965931 | EYA4;EYA4;E  | 6  | 0.00120173 | 0.412847781 | 0.542465158 |
| cg04548096 | EYA4;EYA4;E  | 6  | 4.36E-05   | 0.467979746 | 0.595017991 |
| cg07886701 | FABP9        | 8  | 6.40E-06   | 0.190957794 | 0.318863509 |
| cg04066177 | FABP9        | 8  | 0.00425282 | 0.48612616  | 0.603558979 |
| cg12470218 | FAF1         | 1  | 2.90E-07   | 0.587309067 | 0.749071162 |
| cg11032188 | FAH          | 15 | 2.41E-11   | 0.388238249 | 0.611661648 |

|            |              |    |            |             |             |
|------------|--------------|----|------------|-------------|-------------|
| cg18931398 | FAM102B      | 1  | 0.00288132 | 0.297015354 | 0.406639341 |
| cg11244648 | FAM138D      | 12 | 1.32E-05   | 0.468417977 | 0.573764441 |
| cg22219089 | FAM149A;FA   | 4  | 0.0004443  | 0.233331374 | 0.353258172 |
| cg13786023 | FAM163A      | 1  | 2.11E-11   | 0.417186617 | 0.629420216 |
| cg22781764 | FAM187B      | 19 | 0.00411257 | 0.391041382 | 0.527730359 |
| cg08284758 | FAM189A1     | 15 | 8.33E-10   | 0.351768037 | 0.500647631 |
| cg26330365 | FAM189A1     | 15 | 6.88E-10   | 0.348381734 | 0.480594509 |
| cg19838164 | FAM189A1     | 15 | 4.71E-08   | 0.704895722 | 0.836576087 |
| cg24222175 | FAM19A5;FA   | 22 | 3.36E-06   | 0.399162994 | 0.595930829 |
| cg11562401 | FAM19A5;FA   | 22 | 1.13E-11   | 0.668587915 | 0.783186976 |
| cg18161025 | FAM5B        | 1  | 1.14E-06   | 0.13701675  | 0.240780493 |
| cg27050407 | FAM65B       | 6  | 0.00772853 | 0.468330452 | 0.593205195 |
| cg16689937 | FAM71D;FAM   | 14 | 1.20E-13   | 0.128881589 | 0.32856083  |
| cg22248750 | FAM82A1      | 2  | 0.00203714 | 0.156733386 | 0.260235671 |
| cg08064683 | FAT1         | 4  | 8.94E-05   | 0.400115198 | 0.570521172 |
| cg08070200 | FAT1         | 4  | 0.00017381 | 0.283674662 | 0.428037721 |
| cg00061306 | FBF1         | 17 | 3.11E-11   | 0.481325966 | 0.71799217  |
| cg07638689 | FBN3         | 19 | 2.90E-12   | 0.144820994 | 0.27965085  |
| cg22325186 | FBRSL1       | 12 | 0.00027915 | 0.583111464 | 0.743176562 |
| cg04803930 | FBRSL1       | 12 | 0.00041466 | 0.46921946  | 0.624197686 |
| cg24462656 | FBRSL1       | 12 | 0.00138587 | 0.148065734 | 0.248960721 |
| cg13254809 | FBXO33       | 14 | 4.98E-12   | 0.740800591 | 0.85822195  |
| cg06393098 | FBXO46       | 19 | 1.76E-06   | 0.34345767  | 0.498670113 |
| cg04874286 | FGD6         | 12 | 0.00014971 | 0.169777584 | 0.278071189 |
| cg25921543 | FHIT;FHIT    | 3  | 0.00025892 | 0.686904474 | 0.811129119 |
| cg22851781 | FIBCD1;FIBCI | 9  | 8.18E-06   | 0.643292719 | 0.779941856 |
| cg08377980 | FKBP1AP1     | 19 | 1.18E-05   | 0.452535825 | 0.590383881 |
| cg22160595 | FKBP6;FKBP6  | 7  | 2.45E-10   | 0.76283553  | 0.870325337 |
| cg07171492 | FKBP6;FKBP6  | 7  | 1.57E-11   | 0.641096878 | 0.743556214 |
| cg14020824 | FLJ20184     | 4  | 1.36E-08   | 0.296940711 | 0.450937988 |
| cg25370441 | FLJ20184     | 4  | 3.15E-06   | 0.366558755 | 0.507302679 |
| cg08970682 | FLJ20184     | 4  | 1.60E-07   | 0.326211209 | 0.443943755 |
| cg27126442 | FLJ20184;FLJ | 4  | 3.60E-06   | 0.29589848  | 0.435881674 |
| cg16096766 | FLJ37307;FLJ | 13 | 1.43E-14   | 0.574229014 | 0.734762486 |
| cg18997137 | FLJ37307;FLJ | 13 | 1.44E-14   | 0.376476807 | 0.506652009 |
| cg08508761 | FLT1         | 13 | 5.88E-10   | 0.335315255 | 0.473376859 |
| cg13800491 | FLT1;FLT1;FL | 13 | 0.00018995 | 0.212271768 | 0.329388577 |
| cg19512693 | FLT1;FLT1;FL | 13 | 6.11E-11   | 0.612892429 | 0.714657009 |
| cg01771462 | FMN1         | 15 | 4.82E-07   | 0.631826238 | 0.754382041 |
| cg21617353 | FMNL1        | 17 | 0.00092447 | 0.281406994 | 0.405479287 |
| cg20408776 | FMNL1        | 17 | 0.00155892 | 0.247766182 | 0.354768351 |
| cg15705810 | FMNL2        | 2  | 0.0105953  | 0.186577385 | 0.288244411 |
| cg15129663 | FMO1         | 1  | 6.42E-10   | 0.370304347 | 0.517909988 |
| cg14513071 | FOXD2;FOXD   | 1  | 0.01788734 | 0.582111259 | 0.713485281 |
| cg25481160 | FOXP1        | 3  | 4.56E-07   | 0.196676021 | 0.351828635 |
| cg23199517 | FOXP1;FOXP   | 3  | 0.01620774 | 0.232432447 | 0.340215042 |

|            |             |    |            |             |             |
|------------|-------------|----|------------|-------------|-------------|
| cg18595137 | FREM2       | 13 | 0.00312919 | 0.379196747 | 0.506686371 |
| cg15470075 | FRMD4A      | 10 | 2.68E-11   | 0.482787119 | 0.693282933 |
| cg14621161 | FUT9        | 6  | 4.04E-08   | 0.387706414 | 0.608148672 |
| cg16860392 | FYN;FYN;FYN | 6  | 1.13E-06   | 0.184726892 | 0.339694017 |
| cg06325515 | GABARAPL2   | 16 | 0.00028503 | 0.526307401 | 0.634867955 |
| cg18576667 | GABRG3      | 15 | 5.46E-19   | 0.292649917 | 0.693821837 |
| cg13780614 | GALK2;GALK. | 15 | 0.00020873 | 0.519217384 | 0.622556026 |
| cg06766860 | GALNT9      | 12 | 0.00121929 | 0.324330425 | 0.474425719 |
| cg22149783 | GALNT9      | 12 | 7.96E-09   | 0.411989161 | 0.555172649 |
| cg17479830 | GALNT9      | 12 | 1.36E-10   | 0.366793996 | 0.498341785 |
| cg08102611 | GAS7        | 17 | 0.00233365 | 0.303908055 | 0.413204207 |
| cg23972785 | GATA4       | 8  | 0.00080116 | 0.196045295 | 0.310545398 |
| cg16204205 | GATA6       | 18 | 4.17E-11   | 0.507939806 | 0.726590379 |
| cg14880184 | GATA6       | 18 | 3.95E-06   | 0.48835436  | 0.670395662 |
| cg09507790 | GATA6       | 18 | 2.15E-10   | 0.320476629 | 0.482963605 |
| cg26987699 | GATA6       | 18 | 0.00011965 | 0.650776454 | 0.773395782 |
| cg13937164 | GATA6       | 18 | 7.21E-10   | 0.303342406 | 0.417052036 |
| cg19177125 | GATA6       | 18 | 1.12E-07   | 0.693531087 | 0.806317798 |
| cg13411789 | GCNT2       | 6  | 0.00011277 | 0.235766643 | 0.338364184 |
| cg07320630 | GCOM1;GCO   | 15 | 4.20E-09   | 0.171951896 | 0.348731587 |
| cg00344358 | GDF11       | 12 | 1.46E-11   | 0.266990631 | 0.42303894  |
| cg17870357 | GFRA1;GFRA  | 10 | 1.65E-06   | 0.694977303 | 0.800950594 |
| cg01171885 | GGH         | 8  | 1.71E-05   | 0.573720179 | 0.675010294 |
| cg17049328 | GHRH        | 20 | 6.43E-09   | 0.590425354 | 0.715665316 |
| cg22736037 | GIMAP4      | 7  | 1.81E-11   | 0.134253327 | 0.28585008  |
| cg24413842 | GIMAP7      | 7  | 4.21E-06   | 0.357079671 | 0.506270139 |
| cg00051483 | GIMAP7      | 7  | 1.02E-05   | 0.185099481 | 0.303602659 |
| cg17643598 | GIMAP7      | 7  | 0.00046948 | 0.233056017 | 0.343250221 |
| cg19063768 | GINS1       | 20 | 0.00039973 | 0.334604248 | 0.452049847 |
| cg17215361 | GLB1L2      | 11 | 5.71E-13   | 0.502928052 | 0.720824129 |
| cg18131646 | GLB1L2      | 11 | 4.56E-14   | 0.41655748  | 0.57335515  |
| cg14455592 | GLB1L2      | 11 | 2.51E-11   | 0.643590609 | 0.76578227  |
| cg13847898 | GLDC        | 9  | 5.07E-06   | 0.596886722 | 0.700517112 |
| cg10559151 | GLI2        | 2  | 3.73E-05   | 0.564527722 | 0.66923966  |
| cg24747122 | GNA13       | 17 | 2.66E-07   | 0.412955229 | 0.609766546 |
| cg24401199 | GNA15       | 19 | 0.01431372 | 0.270219176 | 0.378017989 |
| cg19047226 | GNA15       | 19 | 7.66E-05   | 0.440060883 | 0.542292231 |
| cg08535918 | GNAO1;GNA   | 16 | 2.05E-10   | 0.497845811 | 0.606930797 |
| cg08626004 | GNG7        | 19 | 1.06E-05   | 0.525738803 | 0.629858002 |
| cg15418809 | GNPNAT1     | 14 | 0.00777642 | 0.408633771 | 0.508881501 |
| cg02908963 | GPA33       | 1  | 5.98E-07   | 0.388308372 | 0.52111964  |
| cg21222888 | GPC6        | 13 | 0.00222181 | 0.267649172 | 0.367684975 |
| cg11937508 | GPR1;GPR1   | 2  | 1.67E-05   | 0.681163833 | 0.782818374 |
| cg11506658 | GPR126;GPR  | 6  | 0.00044259 | 0.580683926 | 0.688125777 |
| cg01324963 | GPR160      | 3  | 1.55E-07   | 0.429844267 | 0.602992945 |
| cg21221690 | GPR177;GPR  | 1  | 0.00438052 | 0.526856477 | 0.631385653 |

|            |             |    |            |             |             |
|------------|-------------|----|------------|-------------|-------------|
| cg18967835 | GPR18;GPR1  | 13 | 2.03E-05   | 0.513305191 | 0.626217867 |
| cg08343644 | GPR56;GPR5  | 16 | 0.00022979 | 0.228654518 | 0.328806952 |
| cg10336790 | GPR85;GPR8  | 7  | 3.91E-08   | 0.20126941  | 0.333775341 |
| cg09957864 | GPT         | 8  | 0.00309339 | 0.256534286 | 0.368702159 |
| cg05241828 | GPT         | 8  | 0.00491842 | 0.239414925 | 0.346064654 |
| cg15393903 | GRID1       | 10 | 2.67E-07   | 0.468022434 | 0.632664599 |
| cg22902161 | GRID2       | 4  | 2.70E-17   | 0.369530154 | 0.549255056 |
| cg21409965 | GRIK3       | 1  | 1.01E-12   | 0.406451568 | 0.557389642 |
| cg03935060 | GRIN2A;GRIN | 16 | 4.00E-08   | 0.496658765 | 0.604490135 |
| cg16564180 | GRK7        | 3  | 4.90E-07   | 0.464777007 | 0.615181056 |
| cg01584457 | GRK7        | 3  | 8.11E-06   | 0.354118274 | 0.484169411 |
| cg22261780 | GRK7        | 3  | 0.00013136 | 0.630656375 | 0.735287784 |
| cg17107112 | GRM4        | 6  | 3.80E-08   | 0.323220643 | 0.439813623 |
| cg26073844 | GSDMC;GSDI  | 8  | 2.92E-05   | 0.545590058 | 0.669863728 |
| cg23725454 | GSTP1       | 11 | 1.15E-07   | 0.181972506 | 0.306809468 |
| cg13109106 | GTF2B       | 1  | 0.01622653 | 0.376972998 | 0.518553635 |
| cg18118198 | GZMB        | 14 | 7.58E-09   | 0.392534612 | 0.571108382 |
| cg11781421 | HAPLN4      | 19 | 3.22E-08   | 0.2377476   | 0.341858492 |
| cg08615818 | HCCA2       | 11 | 0.00276245 | 0.442284182 | 0.555173624 |
| cg04902924 | HCCA2;FAM9  | 11 | 5.15E-06   | 0.611063095 | 0.713361689 |
| cg20894936 | HCCA2;KRTA  | 11 | 6.80E-08   | 0.282921147 | 0.384329036 |
| cg06507043 | HCG9        | 6  | 0.00036591 | 0.636504244 | 0.738243564 |
| cg06400446 | HCN2        | 19 | 1.85E-13   | 0.53696095  | 0.664978391 |
| cg18736431 | HDAC4       | 2  | 1.19E-12   | 0.362830773 | 0.637308841 |
| cg11707035 | HDAC4       | 2  | 7.43E-17   | 0.434379972 | 0.659321226 |
| cg22101174 | HDAC4       | 2  | 5.77E-12   | 0.335219291 | 0.520815666 |
| cg20298668 | HDAC4       | 2  | 1.37E-19   | 0.142620463 | 0.326577595 |
| cg17356718 | HDAC4       | 2  | 1.25E-16   | 0.16346064  | 0.335199399 |
| cg19449565 | HDAC4       | 2  | 2.57E-12   | 0.149063126 | 0.294019497 |
| cg25828346 | HDAC4       | 2  | 5.86E-08   | 0.578176645 | 0.714523909 |
| cg10515232 | HDAC4       | 2  | 3.16E-07   | 0.281613467 | 0.412377541 |
| cg05171197 | HDAC4       | 2  | 1.11E-09   | 0.193962683 | 0.311669548 |
| cg05997414 | HDAC4       | 2  | 0.00654368 | 0.408395836 | 0.522920557 |
| cg27587095 | HDAC4       | 2  | 5.69E-08   | 0.216667864 | 0.32497997  |
| cg20706597 | HDAC4       | 2  | 6.14E-05   | 0.647850451 | 0.753565627 |
| cg17032161 | HEPHL1      | 11 | 0.00045203 | 0.474000173 | 0.629398041 |
| cg13799242 | HEY2        | 6  | 0.00071114 | 0.560354693 | 0.667478122 |
| cg12157444 | HHLA1       | 8  | 1.32E-09   | 0.560817057 | 0.666851774 |
| cg21783242 | HIPK2;HIPK2 | 7  | 1.05E-07   | 0.610628181 | 0.739273616 |
| cg01171339 | HIST1H2AL   | 6  | 0.00035318 | 0.44071395  | 0.559086417 |
| cg11639651 | HKDC1       | 10 | 6.09E-06   | 0.41737305  | 0.554242412 |
| cg23341612 | HKDC1       | 10 | 7.46E-06   | 0.256264908 | 0.36701934  |
| cg11762346 | HKDC1;HKDC  | 10 | 1.02E-06   | 0.469355067 | 0.598923712 |
| cg06423300 | HLA-DQB2    | 6  | 0.01418233 | 0.514998111 | 0.62355441  |
| cg20022036 | HLA-DRB1    | 6  | 0.0024408  | 0.572676511 | 0.687348084 |
| cg21638712 | HMBS;HMBS   | 11 | 0.00184692 | 0.427639139 | 0.528420822 |

|            |            |    |            |             |             |
|------------|------------|----|------------|-------------|-------------|
| cg17131837 | HMGA2;HMC  | 12 | 5.68E-11   | 0.375438784 | 0.57855957  |
| cg17573720 | HOTAIR     | 12 | 4.87E-09   | 0.202139129 | 0.369107787 |
| cg00079219 | HOTAIR     | 12 | 9.37E-07   | 0.508503293 | 0.669348194 |
| cg05516489 | HOTAIR     | 12 | 1.24E-09   | 0.35435354  | 0.494447823 |
| cg18040901 | HOTAIR     | 12 | 4.13E-05   | 0.385886547 | 0.512710405 |
| cg08575233 | HOXA11;HO  | 7  | 4.77E-10   | 0.234936199 | 0.37596036  |
| cg20994254 | HOXA11AS   | 7  | 0.00587019 | 0.538931115 | 0.680999519 |
| cg00705992 | HOXA11AS;H | 7  | 5.00E-10   | 0.23870935  | 0.387363204 |
| cg05311410 | HOXA11AS;H | 7  | 5.82E-06   | 0.174721435 | 0.297142812 |
| cg24446586 | HOXA11AS;H | 7  | 1.47E-05   | 0.14988181  | 0.269687961 |
| cg13352750 | HOXA11AS;H | 7  | 0.00024716 | 0.193977451 | 0.294458433 |
| cg15982700 | HOXA3;HOX/ | 7  | 6.68E-06   | 0.301558911 | 0.460137973 |
| cg21556281 | HOXA3;HOX/ | 7  | 3.55E-06   | 0.310715817 | 0.458327466 |
| cg16644023 | HOXA3;HOX/ | 7  | 0.00117069 | 0.327094255 | 0.454788175 |
| cg16748008 | HOXA3;HOX/ | 7  | 1.94E-06   | 0.423534842 | 0.546196026 |
| cg16406967 | HOXA3;HOX/ | 7  | 3.60E-06   | 0.604180378 | 0.726003468 |
| cg18680977 | HOXA3;HOX/ | 7  | 3.21E-06   | 0.635393737 | 0.750653259 |
| cg00318947 | HOXA3;HOX/ | 7  | 0.00479451 | 0.617596803 | 0.722567516 |
| cg11908057 | HOXA4      | 7  | 2.52E-05   | 0.363039846 | 0.479304287 |
| cg22660933 | HOXB1      | 17 | 2.93E-09   | 0.462850631 | 0.636952848 |
| cg04904318 | HOXB1      | 17 | 3.79E-08   | 0.234689115 | 0.400658451 |
| cg08076955 | HOXB1      | 17 | 6.57E-07   | 0.457967519 | 0.615082247 |
| cg02497558 | HOXB1      | 17 | 5.37E-09   | 0.313246179 | 0.464048089 |
| cg13752649 | HOXB1      | 17 | 5.65E-12   | 0.237577198 | 0.368659108 |
| cg22296593 | HOXB1      | 17 | 1.38E-12   | 0.209155219 | 0.334008758 |
| cg24900666 | HOXB1      | 17 | 2.18E-09   | 0.540333029 | 0.657636369 |
| cg23530553 | HOXB2      | 17 | 2.51E-08   | 0.294775948 | 0.420267304 |
| cg13280788 | HOXB3      | 17 | 4.00E-18   | 0.177144472 | 0.503397231 |
| cg16787431 | HOXB3      | 17 | 2.26E-10   | 0.341101066 | 0.637106348 |
| cg24767968 | HOXB3      | 17 | 1.93E-16   | 0.229628265 | 0.498451901 |
| cg13293524 | HOXB3      | 17 | 1.43E-14   | 0.253182843 | 0.517932844 |
| cg06186155 | HOXB3      | 17 | 1.60E-09   | 0.373105028 | 0.636128598 |
| cg12570134 | HOXB3      | 17 | 6.52E-17   | 0.199525786 | 0.455790725 |
| cg24963001 | HOXB3      | 17 | 3.65E-16   | 0.146839012 | 0.389878484 |
| cg02458062 | HOXB3      | 17 | 2.85E-13   | 0.197735802 | 0.438151963 |
| cg19236493 | HOXB3      | 17 | 2.67E-11   | 0.288485185 | 0.510550989 |
| cg23014425 | HOXB3      | 17 | 4.23E-09   | 0.457077893 | 0.676754325 |
| cg02873421 | HOXB3      | 17 | 8.79E-11   | 0.249245067 | 0.452812088 |
| cg10165801 | HOXB3      | 17 | 4.51E-11   | 0.266973857 | 0.468153783 |
| cg04117801 | HOXB3      | 17 | 1.82E-12   | 0.212394507 | 0.407140251 |
| cg04800503 | HOXB3      | 17 | 2.29E-11   | 0.348602851 | 0.540429792 |
| cg21853871 | HOXB3      | 17 | 1.09E-09   | 0.172550055 | 0.346941835 |
| cg02749463 | HOXB3      | 17 | 1.01E-14   | 0.145974263 | 0.320360203 |
| cg19986012 | HOXB3      | 17 | 4.14E-10   | 0.283640144 | 0.453884388 |
| cg05387167 | HOXB3      | 17 | 2.92E-11   | 0.18057127  | 0.344000965 |
| cg01593673 | HOXB3      | 17 | 1.95E-13   | 0.134843065 | 0.286732872 |

|            |              |    |            |             |             |
|------------|--------------|----|------------|-------------|-------------|
| cg02836478 | HOXB3        | 17 | 3.17E-13   | 0.134591962 | 0.279216384 |
| cg21872782 | HOXB3        | 17 | 0.000215   | 0.325794384 | 0.4653167   |
| cg15255390 | HOXB3        | 17 | 2.46E-10   | 0.262172841 | 0.395135145 |
| cg23551720 | HOXB3        | 17 | 0.00105759 | 0.665640715 | 0.788656363 |
| cg21399057 | HOXB3        | 17 | 3.20E-06   | 0.225682062 | 0.345054958 |
| cg27656658 | HOXB3        | 17 | 9.57E-06   | 0.183679193 | 0.297277941 |
| cg00524443 | HOXB3        | 17 | 0.00067522 | 0.312471603 | 0.420777898 |
| cg15065049 | HOXB3        | 17 | 1.30E-07   | 0.180996597 | 0.282967439 |
| cg22053945 | HOXB3;HOXE   | 17 | 2.30E-10   | 0.357607149 | 0.654592258 |
| cg12910797 | HOXB3;HOXE   | 17 | 5.03E-16   | 0.149944802 | 0.431426697 |
| cg06395298 | HOXB3;HOXE   | 17 | 5.34E-12   | 0.269006937 | 0.546954716 |
| cg24761525 | HOXB3;HOXE   | 17 | 5.08E-14   | 0.144830005 | 0.32036075  |
| cg04014328 | HOXB4        | 17 | 4.60E-16   | 0.237650025 | 0.450715778 |
| cg11971423 | HOXB4        | 17 | 2.26E-12   | 0.132813503 | 0.262715357 |
| cg10585948 | HOXB4;HOXE   | 17 | 5.45E-16   | 0.282158032 | 0.59677189  |
| cg07318128 | HOXB6        | 17 | 1.71E-13   | 0.224718662 | 0.414996912 |
| cg14698646 | HOXB7        | 17 | 1.38E-15   | 0.207889036 | 0.452616506 |
| cg22502153 | HOXB7        | 17 | 9.88E-15   | 0.193329488 | 0.347515043 |
| cg23669081 | HOXB7        | 17 | 7.59E-06   | 0.158836838 | 0.263108164 |
| cg07266404 | HOXC4;HOXC   | 12 | 1.22E-05   | 0.336747556 | 0.469027794 |
| cg11746813 | HOXC4;HOXC   | 12 | 0.00403072 | 0.375093701 | 0.496657963 |
| cg18473521 | HOXC4;HOXC   | 12 | 0.00019608 | 0.52783917  | 0.642436604 |
| cg22747076 | HOXC4;HOXC   | 12 | 0.00252345 | 0.503965889 | 0.607588622 |
| cg01293179 | HOXD8        | 2  | 1.71E-12   | 0.135705034 | 0.23646904  |
| cg15207662 | HRH2;HRH2    | 5  | 5.03E-10   | 0.404473145 | 0.5776817   |
| cg14773365 | HRH2;HRH2    | 5  | 1.91E-05   | 0.331603954 | 0.46147282  |
| cg16684691 | HS6ST3       | 13 | 1.54E-05   | 0.289549059 | 0.407302572 |
| cg06411137 | HTATIP2;HTA  | 11 | 2.38E-10   | 0.643727613 | 0.754839554 |
| cg16921789 | HTR1F;HTR1I  | 3  | 8.98E-08   | 0.242107434 | 0.354449538 |
| cg17875135 | HTRA1        | 10 | 5.56E-10   | 0.214206399 | 0.390467811 |
| cg21184369 | HTRA4;PLEKH  | 8  | 0.00166128 | 0.45832807  | 0.587742796 |
| cg02669055 | IDO2         | 8  | 4.91E-05   | 0.443440809 | 0.558631038 |
| cg12565636 | IDO2         | 8  | 0.01064056 | 0.277109904 | 0.380298832 |
| cg11823736 | IDO2         | 8  | 0.00074901 | 0.447646515 | 0.54874801  |
| cg13304609 | IFI44L       | 1  | 5.51E-06   | 0.58660786  | 0.704656599 |
| cg17980508 | IFI44L       | 1  | 0.00235142 | 0.240638211 | 0.347623893 |
| cg02897824 | IGFN1        | 1  | 2.63E-13   | 0.254505874 | 0.37792127  |
| cg00297282 | IKZF1        | 7  | 5.12E-07   | 0.30736877  | 0.474073469 |
| cg22870661 | IL17RD       | 3  | 3.39E-09   | 0.475361189 | 0.646898662 |
| cg04100971 | IL18         | 11 | 0.00473539 | 0.346456598 | 0.457481464 |
| cg06658391 | IL1RN;IL1RN; | 2  | 1.55E-06   | 0.471247741 | 0.592614855 |
| cg07424400 | IL29         | 19 | 9.57E-07   | 0.377755045 | 0.478031751 |
| cg04164048 | IL34;IL34    | 16 | 0.00026853 | 0.442123749 | 0.557370479 |
| cg10409753 | IMPG1        | 6  | 8.41E-14   | 0.177549963 | 0.293064288 |
| cg15291905 | INHBA;LOC28  | 7  | 0.00310507 | 0.299545588 | 0.410759358 |
| cg20522046 | INTS6;INTS6; | 13 | 1.02E-05   | 0.411854212 | 0.564959566 |

|            |              |    |            |             |             |
|------------|--------------|----|------------|-------------|-------------|
| cg22042465 | INTS9;INTS9; | 8  | 4.90E-06   | 0.563454991 | 0.66958359  |
| cg06381350 | IRGC         | 19 | 2.68E-05   | 0.48233088  | 0.590361054 |
| cg25312054 | IRS2         | 13 | 4.63E-09   | 0.467441892 | 0.70089874  |
| cg01569664 | IRS2         | 13 | 4.79E-09   | 0.360722225 | 0.514565639 |
| cg21266798 | IRS2         | 13 | 6.35E-12   | 0.200626603 | 0.322903514 |
| cg21601493 | IRS2         | 13 | 2.23E-11   | 0.334219987 | 0.442430139 |
| cg25924746 | IRS2         | 13 | 0.00027351 | 0.353483331 | 0.461188893 |
| cg06088745 | IRX3         | 16 | 2.24E-15   | 0.209550676 | 0.461185019 |
| cg07984286 | IRX3         | 16 | 1.26E-16   | 0.171144371 | 0.296750525 |
| cg05099576 | IRX6         | 16 | 3.82E-08   | 0.521292254 | 0.681320844 |
| cg02602550 | IRX6         | 16 | 1.37E-13   | 0.295714809 | 0.43462665  |
| cg07541744 | IRX6         | 16 | 2.10E-07   | 0.58818141  | 0.712983646 |
| cg01554410 | IRX6         | 16 | 0.00077526 | 0.491095103 | 0.601188349 |
| cg02198701 | IRX6         | 16 | 3.15E-05   | 0.376815863 | 0.484706127 |
| cg26293019 | ISL1         | 5  | 1.18E-07   | 0.242989558 | 0.407246625 |
| cg17686487 | ISL1         | 5  | 1.81E-12   | 0.171938519 | 0.281851819 |
| cg18739865 | ISL1         | 5  | 3.74E-13   | 0.097750048 | 0.200739193 |
| cg10425970 | ITCH         | 20 | 1.51E-16   | 0.177269171 | 0.360623641 |
| cg12481426 | ITCH         | 20 | 3.25E-05   | 0.333313113 | 0.435716551 |
| cg19801256 | ITGA1        | 5  | 0.00011175 | 0.339220071 | 0.450944698 |
| cg25422405 | ITGAE        | 17 | 1.26E-16   | 0.153772402 | 0.300746211 |
| cg02225720 | ITGAE        | 17 | 0.00336887 | 0.232651463 | 0.349650096 |
| cg11011533 | ITGAE        | 17 | 7.22E-12   | 0.184837054 | 0.292078737 |
| cg07249742 | ITGB5        | 3  | 2.00E-09   | 0.189146994 | 0.3466949   |
| cg10094191 | ITLN1        | 1  | 6.34E-10   | 0.435065162 | 0.621438141 |
| cg15739913 | ITPR1;ITPR1; | 3  | 2.59E-13   | 0.405070923 | 0.632131822 |
| cg05795849 | ITPR1;ITPR1; | 3  | 1.38E-10   | 0.135242768 | 0.273594831 |
| cg11085762 | JAK3         | 19 | 0.0108759  | 0.706795896 | 0.825895425 |
| cg19484995 | JAM3         | 11 | 0.00064917 | 0.522773211 | 0.630251162 |
| cg15153264 | JMJD1C       | 10 | 4.96E-08   | 0.368684501 | 0.506651559 |
| cg00295293 | JPH1         | 8  | 0.00015314 | 0.3574932   | 0.476625269 |
| cg23185753 | KCNAB1;KCN   | 3  | 9.72E-09   | 0.576868967 | 0.788417974 |
| cg14983936 | KCNH7        | 2  | 0.000371   | 0.322110949 | 0.453639205 |
| cg17782848 | KCNIP1;KCN   | 5  | 1.60E-09   | 0.490153752 | 0.651257208 |
| cg11612852 | KCNIP4;KCN   | 4  | 1.89E-07   | 0.439109911 | 0.611939783 |
| cg10867349 | KCNK10       | 14 | 4.40E-07   | 0.240013261 | 0.369217872 |
| cg00848374 | KCNK2;KCNK   | 1  | 0.0019418  | 0.286345407 | 0.390498941 |
| cg13730736 | KCNT1        | 9  | 3.94E-09   | 0.259341341 | 0.388234955 |
| cg24193140 | KCTD16       | 5  | 1.10E-05   | 0.4966498   | 0.630219421 |
| cg01853079 | KDELC2       | 11 | 8.65E-06   | 0.241601159 | 0.38546849  |
| cg03358468 | KDM4B        | 19 | 0.0003499  | 0.380140392 | 0.54974186  |
| cg13842202 | KDM4C        | 9  | 5.92E-07   | 0.445289058 | 0.597534004 |
| cg24128630 | KDM6B;TME    | 17 | 0.00066189 | 0.674572633 | 0.774721288 |
| cg08145381 | KIAA0317     | 14 | 0.00016526 | 0.251067015 | 0.367620764 |
| cg27048684 | KIAA0556     | 16 | 1.67E-09   | 0.542694321 | 0.717126485 |
| cg27636914 | KIAA0556     | 16 | 1.08E-12   | 0.243567947 | 0.393620669 |



|            |              |    |            |             |             |
|------------|--------------|----|------------|-------------|-------------|
| cg26540647 | KIAA0556     | 16 | 2.24E-12   | 0.504329903 | 0.60777682  |
| cg26526047 | KIAA1217     | 10 | 4.69E-15   | 0.278106246 | 0.518943603 |
| cg05217312 | KIAA1217     | 10 | 0.00059784 | 0.515416228 | 0.623454965 |
| cg17646571 | KIAA1217     | 10 | 7.18E-08   | 0.687326256 | 0.792157619 |
| cg26680350 | KIAA1217;KIF | 10 | 6.01E-08   | 0.578842305 | 0.691021222 |
| cg07200490 | KIAA1244     | 6  | 0.00022341 | 0.368595323 | 0.474924595 |
| cg23464271 | KIAA1409;CC  | 14 | 0.0003625  | 0.260555381 | 0.366774859 |
| cg25850629 | KIAA1522     | 1  | 3.07E-12   | 0.26129547  | 0.441112251 |
| cg19486070 | KIAA1908;KIF | 7  | 3.53E-12   | 0.232518818 | 0.413249896 |
| cg00399295 | KIF22        | 16 | 1.20E-09   | 0.558236367 | 0.660885809 |
| cg24359109 | KIF26B       | 1  | 9.11E-10   | 0.390816566 | 0.497181252 |
| cg18292711 | KIF5B        | 10 | 0.00098551 | 0.440012046 | 0.556413852 |
| cg23796755 | KIRREL3;KIRF | 11 | 4.73E-10   | 0.539546963 | 0.690677396 |
| cg08336938 | KIRREL3;KIRF | 11 | 4.18E-10   | 0.64859683  | 0.77672659  |
| cg12229775 | KLF12        | 13 | 8.56E-05   | 0.330884821 | 0.43503474  |
| cg03975844 | KLHDC8A      | 1  | 2.01E-14   | 0.562367075 | 0.746573113 |
| cg10769618 | KLHL23       | 2  | 3.88E-10   | 0.198723005 | 0.358297173 |
| cg15792367 | KLK11;KLK11  | 19 | 4.57E-15   | 0.242256477 | 0.463567906 |
| cg23018063 | KLK11;KLK11  | 19 | 2.21E-12   | 0.32454308  | 0.469557784 |
| cg09735896 | KRT12        | 17 | 0.00035756 | 0.335988188 | 0.447805989 |
| cg04986934 | KRT12        | 17 | 0.00071696 | 0.388073425 | 0.498322728 |
| cg14782970 | KRT3         | 12 | 0.00114157 | 0.305083334 | 0.461955331 |
| cg24184737 | KRTAP24-1    | 21 | 8.82E-06   | 0.229551062 | 0.351373866 |
| cg21815502 | KRTAP4-9     | 17 | 1.94E-05   | 0.396830514 | 0.507454875 |
| cg08983253 | KRTAP5-8     | 11 | 2.34E-09   | 0.284886025 | 0.386460514 |
| cg19826115 | KYNU;KYNU    | 2  | 0.00012701 | 0.293680108 | 0.466992461 |
| cg04671742 | LAG3;LAG3    | 12 | 1.64E-05   | 0.352267891 | 0.457935309 |
| cg00222175 | LARGE;LARGI  | 22 | 6.76E-08   | 0.527278838 | 0.671411833 |
| cg01089331 | LCORL;LCORI  | 4  | 1.54E-06   | 0.554482039 | 0.68258092  |
| cg06818159 | LDB2;LDB2    | 4  | 3.58E-05   | 0.259463204 | 0.367408794 |
| cg01655427 | LEF1;LEF1;LE | 4  | 8.83E-10   | 0.261638579 | 0.429185255 |
| cg21600258 | LEF1;LEF1;LE | 4  | 1.18E-11   | 0.157733055 | 0.281010342 |
| cg08962888 | LGALS3BP     | 17 | 6.84E-19   | 0.208882178 | 0.479014008 |
| cg03082060 | LGALS8       | 1  | 1.51E-11   | 0.27350904  | 0.46490204  |
| cg03763118 | LGR4         | 11 | 5.82E-05   | 0.169991317 | 0.277246417 |
| cg16353006 | LHX9         | 1  | 2.37E-08   | 0.174822589 | 0.324854743 |
| cg15544654 | LHX9         | 1  | 1.02E-09   | 0.140340723 | 0.252107637 |
| cg20495052 | LIN7A        | 12 | 4.35E-06   | 0.274330032 | 0.418807822 |
| cg02744046 | LIPC         | 15 | 8.07E-07   | 0.558359339 | 0.69615939  |
| cg00870269 | LIPC         | 15 | 3.34E-08   | 0.600551459 | 0.713945753 |
| cg10512951 | LMBRD1       | 6  | 6.06E-05   | 0.309601931 | 0.436550375 |
| cg06697448 | LMCD1        | 3  | 0.00023712 | 0.289585877 | 0.409974405 |
| cg06266100 | LMCD1        | 3  | 4.96E-08   | 0.525131992 | 0.634646373 |
| cg19161251 | LMO4         | 1  | 4.49E-10   | 0.456765137 | 0.639025005 |
| cg23087598 | LMX1A        | 1  | 1.59E-06   | 0.256846728 | 0.375429432 |
| cg05229742 | LMX1A        | 1  | 1.17E-09   | 0.460000353 | 0.560636799 |

|            |             |    |            |             |             |
|------------|-------------|----|------------|-------------|-------------|
| cg05899118 | LMX1A;LMX1  | 1  | 0.00020637 | 0.648291207 | 0.7530943   |
| cg19684083 | LNx1;LNx1   | 4  | 0.00458785 | 0.479507303 | 0.597612616 |
| cg21580089 | LNx1;LNx1   | 4  | 0.00248529 | 0.307735999 | 0.417259823 |
| cg17282466 | LOC1001300  | 4  | 1.53E-05   | 0.476837104 | 0.594632122 |
| cg24956533 | LOC145845   | 15 | 2.32E-19   | 0.292901232 | 0.693498865 |
| cg06451900 | LOC145845   | 15 | 6.84E-19   | 0.206230869 | 0.570914146 |
| cg11965311 | LOC145845   | 15 | 2.82E-16   | 0.348651509 | 0.704055374 |
| cg22444584 | LOC145845   | 15 | 2.24E-18   | 0.196204269 | 0.516611185 |
| cg00216138 | LOC145845   | 15 | 8.65E-13   | 0.155440146 | 0.400609003 |
| cg00213301 | LOC145845   | 15 | 1.68E-12   | 0.327784976 | 0.546078344 |
| cg20034372 | LOC145845   | 15 | 7.18E-19   | 0.151650297 | 0.317965087 |
| cg12309653 | LOC145845   | 15 | 1.92E-09   | 0.218735766 | 0.383252196 |
| cg00130808 | LOC145845   | 15 | 9.27E-06   | 0.559025095 | 0.704828172 |
| cg16802592 | LOC145845   | 15 | 1.75E-19   | 0.122347994 | 0.265162912 |
| cg17921924 | LOC145845   | 15 | 0.00115091 | 0.493206231 | 0.625082794 |
| cg26727768 | LOC145845   | 15 | 0.00366763 | 0.434185876 | 0.550921476 |
| cg22121570 | LOC145845   | 15 | 0.00158902 | 0.399445383 | 0.514430905 |
| cg14475966 | LOC145845   | 15 | 1.03E-07   | 0.566824602 | 0.679053613 |
| cg16890051 | LOC145845   | 15 | 5.29E-11   | 0.06955528  | 0.171497657 |
| cg27042266 | LOC145845   | 15 | 2.83E-13   | 0.070953284 | 0.172111749 |
| cg26330116 | LOC145845   | 15 | 7.77E-13   | 0.100549163 | 0.20086804  |
| cg03228943 | LOC150185   | 22 | 3.10E-10   | 0.319225198 | 0.462187158 |
| cg07977927 | LOC154822   | 7  | 0.0001539  | 0.477198984 | 0.611191184 |
| cg01454752 | LOC157627   | 8  | 1.29E-07   | 0.302404935 | 0.430187027 |
| cg27598956 | LOC157627   | 8  | 6.63E-11   | 0.256747179 | 0.368351104 |
| cg01787735 | LOC162632   | 17 | 9.76E-05   | 0.419096878 | 0.550629262 |
| cg24205805 | LOC162632   | 17 | 1.08E-06   | 0.671983041 | 0.776329961 |
| cg24527452 | LOC220115   | 13 | 0.00201701 | 0.411745551 | 0.532631714 |
| cg08930147 | LOC283999   | 17 | 0.00012339 | 0.414483    | 0.525030556 |
| cg23627062 | LOC285045   | 2  | 1.25E-06   | 0.370371292 | 0.538092939 |
| cg18413237 | LOC285954;L | 7  | 0.00969261 | 0.305389367 | 0.406406208 |
| cg05885137 | LOC285954;L | 7  | 0.00557884 | 0.327627931 | 0.443735632 |
| cg19535073 | LOC285954;L | 7  | 4.00E-11   | 0.237734798 | 0.351651028 |
| cg16662846 | LOC339535   | 1  | 2.71E-05   | 0.240549111 | 0.375293984 |
| cg02249228 | LOC340357   | 8  | 4.94E-07   | 0.353152518 | 0.483818048 |
| cg12744859 | LOC404266;T | 17 | 5.42E-10   | 0.308961094 | 0.5143466   |
| cg19047868 | LOC404266;T | 17 | 2.61E-11   | 0.345094993 | 0.526789857 |
| cg00711072 | LOC404266;T | 17 | 3.53E-07   | 0.484045082 | 0.654275072 |
| cg20591728 | LOC404266;T | 17 | 5.30E-11   | 0.344620495 | 0.517629103 |
| cg09704116 | LOC404266;L | 17 | 3.87E-12   | 0.194392431 | 0.368027047 |
| cg10588962 | LOC404266;L | 17 | 2.03E-06   | 0.295868141 | 0.455741988 |
| cg09595185 | LOC404266;L | 17 | 0.00481273 | 0.452862132 | 0.563892315 |
| cg25960038 | LOC404266;L | 17 | 0.00820665 | 0.569374446 | 0.670326276 |
| cg18127922 | LOC404266;L | 17 | 4.69E-15   | 0.236543441 | 0.483612061 |
| cg05487507 | LOC404266;L | 17 | 4.31E-11   | 0.247791328 | 0.424107371 |
| cg17062109 | LOC404266;L | 17 | 3.35E-11   | 0.159367967 | 0.29296733  |

|            |              |    |            |             |             |
|------------|--------------|----|------------|-------------|-------------|
| cg24889708 | LOC404266;L  | 17 | 2.01E-14   | 0.134979094 | 0.384932802 |
| cg23217463 | LOC404266;L  | 17 | 1.16E-09   | 0.496154398 | 0.702377788 |
| cg15908709 | LOC404266;L  | 17 | 2.05E-13   | 0.15479632  | 0.339530032 |
| cg22583148 | LOC404266;L  | 17 | 1.32E-09   | 0.256946711 | 0.419227203 |
| cg10308785 | LOC404266;L  | 17 | 8.84E-13   | 0.096574951 | 0.216614267 |
| cg08832695 | LOC404266;L  | 17 | 6.49E-12   | 0.181840957 | 0.282026827 |
| cg00682096 | LOC404266;L  | 17 | 7.76E-13   | 0.35084197  | 0.538617087 |
| cg21864868 | LOC404266;L  | 17 | 7.37E-15   | 0.16325406  | 0.314087659 |
| cg01558401 | LOC728264    | 5  | 8.45E-09   | 0.353916068 | 0.468788894 |
| cg02927821 | LOC730755    | 17 | 1.90E-12   | 0.250929189 | 0.440317962 |
| cg09603824 | LOH3CR2A     | 3  | 0.00494547 | 0.255070922 | 0.358855665 |
| cg01191064 | LOX          | 5  | 4.83E-08   | 0.428928493 | 0.558946772 |
| cg05580512 | LPCAT1       | 5  | 4.15E-12   | 0.411401062 | 0.694189469 |
| cg06755258 | LPCAT1       | 5  | 1.03E-06   | 0.313066716 | 0.547373502 |
| cg04005843 | LPCAT1       | 5  | 5.80E-13   | 0.260817868 | 0.435460262 |
| cg11229797 | LPCAT1       | 5  | 1.24E-06   | 0.708125459 | 0.833921555 |
| cg16406385 | LPHN3        | 4  | 1.77E-08   | 0.473891822 | 0.645102781 |
| cg22671986 | LPHN3        | 4  | 1.17E-06   | 0.399984142 | 0.565225727 |
| cg12646794 | LPHN3        | 4  | 2.66E-07   | 0.258741766 | 0.3880806   |
| cg02075410 | LRBA;MAB21   | 4  | 5.17E-05   | 0.250908534 | 0.363016938 |
| cg03252605 | LRP1B        | 2  | 3.02E-11   | 0.211505003 | 0.339471693 |
| cg26525861 | LRP5         | 11 | 3.73E-05   | 0.556429859 | 0.680253614 |
| cg01822532 | LRP5         | 11 | 0.00010396 | 0.620436341 | 0.738244747 |
| cg25366155 | LRP5         | 11 | 0.00034782 | 0.288118621 | 0.389776355 |
| cg11365440 | LRR2;LRR2    | 3  | 0.00010635 | 0.367543046 | 0.471444155 |
| cg04629424 | LRR23;LRR2   | 12 | 1.20E-07   | 0.441511724 | 0.555202607 |
| cg17649560 | LRR37B2      | 17 | 4.63E-15   | 0.612864021 | 0.828667011 |
| cg14788655 | LRR4C        | 11 | 4.50E-11   | 0.691033881 | 0.81681554  |
| cg13184448 | LRRFIP1;LRRF | 2  | 0.00055755 | 0.48975245  | 0.625134179 |
| cg13262467 | LRR1Q4       | 3  | 1.94E-06   | 0.259661798 | 0.395114706 |
| cg23479065 | LRRN1        | 3  | 0.00010035 | 0.514636463 | 0.637470364 |
| cg09623845 | LRRN1        | 3  | 2.92E-05   | 0.578994742 | 0.699425445 |
| cg16056219 | LTBP2        | 14 | 4.04E-10   | 0.134080752 | 0.296807928 |
| cg11015348 | LUZP2        | 11 | 0.0010624  | 0.567430384 | 0.67045226  |
| cg21710826 | MACC1        | 7  | 0.00316381 | 0.300879904 | 0.407973755 |
| cg09230154 | MACF1;MAC    | 1  | 3.31E-05   | 0.144746254 | 0.260105811 |
| cg04653264 | MAD1L1;MA    | 7  | 1.19E-05   | 0.429498644 | 0.568575141 |
| cg07610468 | MAD1L1;MA    | 7  | 5.13E-08   | 0.446952095 | 0.582461428 |
| cg21767034 | MAD1L1;MA    | 7  | 0.00917992 | 0.62282393  | 0.729202751 |
| cg04170282 | MAD1L1;MA    | 7  | 0.00025913 | 0.477016328 | 0.583156824 |
| cg19266014 | MAD1L1;MA    | 7  | 0.00013362 | 0.668093119 | 0.769004819 |
| cg03331514 | MAFK         | 7  | 5.78E-05   | 0.240953121 | 0.350190691 |
| cg22850451 | MAP1S        | 19 | 2.03E-08   | 0.619980846 | 0.736668386 |
| cg18572353 | MAP3K13      | 3  | 3.00E-06   | 0.243448424 | 0.378071866 |
| cg15366423 | MAPK4        | 18 | 2.62E-07   | 0.627077816 | 0.730613088 |
| cg07289766 | MBNL2;MBN    | 13 | 0.00246503 | 0.529970564 | 0.634998951 |

|            |             |    |            |             |             |
|------------|-------------|----|------------|-------------|-------------|
| cg16893707 | MBP;MBP     | 18 | 5.18E-18   | 0.233922959 | 0.510579966 |
| cg07807210 | MBP;MBP     | 18 | 9.88E-05   | 0.414545371 | 0.525089523 |
| cg13852093 | MBP;MBP     | 18 | 1.38E-10   | 0.218751837 | 0.322246874 |
| cg00706570 | MBP;MBP;M   | 18 | 1.25E-06   | 0.499919872 | 0.632308918 |
| cg13375905 | MBP;MBP;M   | 18 | 8.19E-08   | 0.706347315 | 0.819259466 |
| cg00839132 | MBP;MBP;M   | 18 | 3.65E-05   | 0.676762112 | 0.779653254 |
| cg13450266 | MCF2L       | 13 | 2.34E-09   | 0.443132872 | 0.643526913 |
| cg18842310 | MCF2L       | 13 | 8.97E-14   | 0.167095386 | 0.330712316 |
| cg06905499 | MCF2L;MCF2  | 13 | 1.43E-14   | 0.427835081 | 0.696703442 |
| cg21331791 | MCF2L;MCF2  | 13 | 4.65E-08   | 0.356778929 | 0.458807108 |
| cg10855276 | MCF2L;MCF2  | 13 | 4.24E-06   | 0.376529472 | 0.477649801 |
| cg08130814 | MCPH1       | 8  | 1.34E-06   | 0.52038695  | 0.667978483 |
| cg15646626 | MCPH1       | 8  | 2.63E-05   | 0.60476964  | 0.745582795 |
| cg16529799 | MCTP1;MCTI  | 5  | 9.97E-05   | 0.377813868 | 0.495630327 |
| cg08426962 | MCTP1;MCTI  | 5  | 1.53E-06   | 0.155057917 | 0.259687852 |
| cg21105955 | MDC1        | 6  | 2.02E-06   | 0.308378556 | 0.417684695 |
| cg22964621 | MDGA2       | 14 | 8.78E-06   | 0.452453301 | 0.574219085 |
| cg20686446 | MED25       | 19 | 1.48E-07   | 0.335515351 | 0.469753308 |
| cg19390582 | MED26       | 19 | 5.39E-11   | 0.422082811 | 0.602665264 |
| cg26429266 | MEGF10      | 5  | 7.60E-06   | 0.270044882 | 0.40939331  |
| cg24258705 | MET;MET     | 7  | 5.25E-05   | 0.2968911   | 0.452204876 |
| cg11076668 | MEX3B       | 15 | 0.00039251 | 0.474645714 | 0.6059797   |
| cg05419798 | MGAT5B;MG   | 17 | 8.09E-10   | 0.314497681 | 0.45420236  |
| cg26518431 | MGC12982;F  | 1  | 1.06E-06   | 0.46255184  | 0.595322161 |
| cg06975633 | MGC27382    | 1  | 3.95E-14   | 0.258282583 | 0.470779295 |
| cg12942878 | MGC2889;HF  | 3  | 6.09E-06   | 0.465753088 | 0.57228085  |
| cg03421014 | MGST2       | 4  | 1.55E-05   | 0.473868533 | 0.577924997 |
| cg01589461 | MIB2;MIB2;N | 1  | 4.83E-12   | 0.247150157 | 0.378317527 |
| cg19165249 | MIB2;MIB2;N | 1  | 4.23E-10   | 0.465910267 | 0.576628151 |
| cg14249564 | MICALCL     | 11 | 2.94E-08   | 0.524893176 | 0.68840957  |
| cg01572694 | MIR10A      | 17 | 4.15E-11   | 0.187521363 | 0.303284111 |
| cg02206323 | MIR1180;B9I | 17 | 2.97E-05   | 0.533001481 | 0.652971988 |
| cg24553547 | MIR1180;B9I | 17 | 0.00560855 | 0.767430326 | 0.875215319 |
| cg07686441 | MIR1266;MY  | 15 | 2.22E-07   | 0.424610692 | 0.53791548  |
| cg25883149 | MIR1471     | 2  | 9.17E-06   | 0.317936756 | 0.422195598 |
| cg12779445 | MIR153-2;PT | 7  | 1.38E-07   | 0.563609202 | 0.700543968 |
| cg23121785 | MIR184      | 15 | 3.41E-10   | 0.596786693 | 0.698799415 |
| cg25687874 | MIR2117     | 17 | 3.57E-07   | 0.300549151 | 0.433285059 |
| cg25249448 | MIR216A     | 2  | 7.10E-09   | 0.462443549 | 0.575274969 |
| cg25023761 | MIR320B1    | 1  | 0.00010375 | 0.170832898 | 0.278277774 |
| cg16595458 | MIR548F3;CI | 7  | 2.64E-09   | 0.429928486 | 0.599995137 |
| cg21182526 | MIR548N;OS  | 2  | 1.83E-05   | 0.423709195 | 0.569533892 |
| cg03489020 | MITF;MITF   | 3  | 0.00040494 | 0.389688717 | 0.514961889 |
| cg03847535 | MITF;MITF;N | 3  | 5.35E-05   | 0.488541512 | 0.634841069 |
| cg19365810 | MLL3        | 7  | 0.00743094 | 0.411634767 | 0.517002284 |
| cg20798249 | MLNR        | 13 | 8.71E-05   | 0.400614372 | 0.506933262 |

|            |             |    |            |             |             |
|------------|-------------|----|------------|-------------|-------------|
| cg14297867 | MOBKL2B;IFI | 9  | 2.92E-07   | 0.697001665 | 0.821716132 |
| cg07331098 | MOV10L1;M   | 22 | 0.0002406  | 0.298612119 | 0.430017993 |
| cg11839415 | MPL         | 1  | 0.00010658 | 0.244544137 | 0.362914357 |
| cg13066461 | MRGPRX2     | 11 | 0.00110553 | 0.402120338 | 0.528501867 |
| cg16446783 | MRGPRX4     | 11 | 8.51E-06   | 0.470971596 | 0.591990848 |
| cg02608124 | MRGPRX4     | 11 | 3.90E-05   | 0.268902087 | 0.373016293 |
| cg10354406 | MRPS35      | 12 | 1.16E-07   | 0.708754055 | 0.818559566 |
| cg26632171 | MSGN1       | 2  | 0.00018299 | 0.383127637 | 0.487383594 |
| cg18434588 | MSH3        | 5  | 0.00298351 | 0.253189497 | 0.356001789 |
| cg04068914 | MTHFSD;MTI  | 16 | 5.55E-06   | 0.415691808 | 0.542726086 |
| cg08963616 | MTMR7       | 8  | 4.63E-05   | 0.222842382 | 0.373252779 |
| cg27596649 | MTMR7       | 8  | 0.00016839 | 0.458675531 | 0.573552344 |
| cg11750962 | MTOR        | 1  | 4.22E-07   | 0.41180294  | 0.588729296 |
| cg23002008 | MTUS1;MTU   | 8  | 0.01702658 | 0.43896333  | 0.548897655 |
| cg16753939 | MUPCDH;ML   | 11 | 2.05E-07   | 0.476216914 | 0.578483725 |
| cg15806880 | MUPCDH;ML   | 11 | 8.21E-05   | 0.484274215 | 0.585325065 |
| cg00421089 | MYH1        | 17 | 1.82E-12   | 0.292677908 | 0.586726141 |
| cg25650956 | MYH1        | 17 | 2.71E-09   | 0.136687213 | 0.268512257 |
| cg14833286 | MYH1        | 17 | 3.32E-07   | 0.133534782 | 0.260284848 |
| cg03564620 | MYH6        | 14 | 2.40E-11   | 0.457116927 | 0.589987096 |
| cg05241732 | MYH6;MIR2C  | 14 | 4.62E-14   | 0.23513161  | 0.407556095 |
| cg18449361 | MYLK4       | 6  | 0.0090671  | 0.456382878 | 0.580634231 |
| cg17129576 | MYO18A;MY   | 17 | 3.08E-07   | 0.412285581 | 0.576332138 |
| cg11508595 | MYO1B;MYO   | 2  | 8.17E-06   | 0.399567428 | 0.575836941 |
| cg03497895 | MYO1E       | 15 | 0.00103992 | 0.372821754 | 0.480725382 |
| cg21225667 | MYO1E       | 15 | 0.00085249 | 0.231977258 | 0.338172035 |
| cg22132788 | MYO1G       | 7  | 0.00336094 | 0.286825601 | 0.39545094  |
| cg12284098 | MYOM2       | 8  | 9.46E-06   | 0.683614039 | 0.80820159  |
| cg13428978 | MYOM2       | 8  | 9.14E-05   | 0.428691078 | 0.528963899 |
| cg16198468 | MYST4       | 10 | 0.00129359 | 0.316361955 | 0.429803969 |
| cg09022325 | MYT1L       | 2  | 5.65E-13   | 0.416143752 | 0.577873105 |
| cg13205617 | MYT1L       | 2  | 6.87E-06   | 0.528735076 | 0.646486313 |
| cg20345923 | MYT1L       | 2  | 5.07E-13   | 0.474866134 | 0.582210258 |
| cg17187705 | NBEA        | 13 | 6.78E-10   | 0.588513543 | 0.748638742 |
| cg15234400 | NBLA00301   | 4  | 0.01811634 | 0.562270959 | 0.669133857 |
| cg07681935 | NBLA00301;f | 4  | 1.20E-09   | 0.364836063 | 0.585955292 |
| cg03031839 | NCALD;NCAL  | 8  | 2.49E-07   | 0.619435227 | 0.728813559 |
| cg27015161 | NCOA1;NCO   | 2  | 0.00369455 | 0.23111129  | 0.34903066  |
| cg09831875 | NCOR2;NCO   | 12 | 8.59E-05   | 0.168112059 | 0.270333789 |
| cg17521134 | NCRNA0005   | 15 | 0.0003889  | 0.349784883 | 0.450744146 |
| cg07073072 | NCRNA0016   | 21 | 1.34E-16   | 0.175663121 | 0.364519769 |
| cg13136556 | NCRNA0016   | 21 | 2.38E-13   | 0.266607851 | 0.416777814 |
| cg08762432 | NEBL        | 10 | 2.78E-08   | 0.227285213 | 0.33909124  |
| cg16582660 | NEDD9       | 6  | 1.41E-15   | 0.410855529 | 0.627548241 |
| cg19524009 | NEK3;NEK3;N | 13 | 0.00011179 | 0.555714909 | 0.697664723 |
| cg08826184 | NELL2;NELL2 | 12 | 4.31E-06   | 0.217937331 | 0.322299844 |

|            |             |    |            |             |             |
|------------|-------------|----|------------|-------------|-------------|
| cg13861749 | NETO1;NETO  | 18 | 2.15E-05   | 0.26510875  | 0.370143153 |
| cg20712631 | NEURL1B     | 5  | 0.00014353 | 0.389979111 | 0.498439832 |
| cg15884713 | NINJ2       | 12 | 0.00139121 | 0.282745783 | 0.385565949 |
| cg06374325 | NKX6-1      | 4  | 2.32E-17   | 0.197785843 | 0.449128195 |
| cg02489958 | NKX6-1      | 4  | 6.51E-08   | 0.135560828 | 0.313302368 |
| cg18297736 | NKX6-1      | 4  | 2.02E-09   | 0.100110018 | 0.265926849 |
| cg27406678 | NKX6-1      | 4  | 9.48E-09   | 0.125723317 | 0.287996125 |
| cg24845848 | NKX6-1      | 4  | 1.64E-11   | 0.100238717 | 0.246711893 |
| cg22256677 | NKX6-1      | 4  | 1.65E-08   | 0.121037894 | 0.266847017 |
| cg25830182 | NKX6-1      | 4  | 9.37E-12   | 0.088492276 | 0.225173051 |
| cg22598426 | NKX6-1      | 4  | 8.63E-06   | 0.172972527 | 0.284089773 |
| cg02328758 | NLGN1       | 3  | 0.00057677 | 0.327619331 | 0.438880753 |
| cg22960621 | NLGN1       | 3  | 0.00460684 | 0.291858135 | 0.395130687 |
| cg04117590 | NMNAT3      | 3  | 2.14E-09   | 0.319162132 | 0.491854558 |
| cg18367578 | NNMT        | 11 | 2.97E-05   | 0.210616206 | 0.31101172  |
| cg05006942 | NOB1        | 16 | 1.26E-08   | 0.330780299 | 0.503506515 |
| cg03250947 | NOTCH4      | 6  | 6.42E-05   | 0.424934804 | 0.56770377  |
| cg03770952 | NOVA2       | 19 | 0.00018678 | 0.376628614 | 0.497884055 |
| cg06979108 | NOX4        | 11 | 5.14E-08   | 0.373995506 | 0.518462602 |
| cg26893231 | NOX4;NOX4   | 11 | 1.42E-05   | 0.60958451  | 0.732961913 |
| cg03018496 | NR2F2       | 15 | 2.84E-10   | 0.186781571 | 0.361211223 |
| cg17826834 | NR2F2       | 15 | 2.41E-09   | 0.232891944 | 0.404199006 |
| cg01213447 | NR2F2       | 15 | 3.08E-06   | 0.334725334 | 0.500881727 |
| cg26593946 | NR2F2       | 15 | 3.66E-06   | 0.115899567 | 0.225803685 |
| cg23734137 | NR2F2       | 15 | 0.00150428 | 0.564308102 | 0.673966591 |
| cg14143574 | NR5A1       | 9  | 1.78E-16   | 0.516666501 | 0.724334732 |
| cg22651812 | NRG1        | 8  | 1.45E-05   | 0.433371235 | 0.569881822 |
| cg27133711 | NRG1        | 8  | 0.01740995 | 0.310259896 | 0.412032308 |
| cg15339688 | NRG3;NRG3;  | 10 | 9.49E-11   | 0.345454701 | 0.552326804 |
| cg06850159 | NRG3;NRG3;  | 10 | 5.96E-13   | 0.188496066 | 0.384694699 |
| cg19731541 | NRP2;NRP2;I | 2  | 0.00183778 | 0.420482197 | 0.552963873 |
| cg15573998 | NRXN1;NRXN  | 2  | 1.04E-11   | 0.465535036 | 0.701953739 |
| cg22159835 | NRXN2;NRXN  | 11 | 2.15E-11   | 0.437437786 | 0.576411311 |
| cg19345244 | NTF3;NTF3   | 12 | 1.68E-07   | 0.488888257 | 0.69126658  |
| cg05210558 | NTM         | 11 | 3.08E-08   | 0.410472756 | 0.57471158  |
| cg23759189 | NTM         | 11 | 5.18E-08   | 0.425031082 | 0.551839916 |
| cg27284627 | NTM         | 11 | 3.17E-06   | 0.300535712 | 0.420573186 |
| cg16670307 | NTM         | 11 | 2.99E-05   | 0.228679032 | 0.346759192 |
| cg04934246 | NTM         | 11 | 0.00021014 | 0.687208305 | 0.797646842 |
| cg06217320 | NTM;NTM;N   | 11 | 0.0001441  | 0.395953534 | 0.52423218  |
| cg13698224 | NTRK2;NTRK  | 9  | 0.00068951 | 0.518046488 | 0.644945686 |
| cg21085594 | NUP50       | 22 | 0.00128025 | 0.570058651 | 0.673559309 |
| cg25670974 | NXN         | 17 | 2.14E-06   | 0.510818796 | 0.641066654 |
| cg24355809 | NXN         | 17 | 3.51E-06   | 0.419500178 | 0.536032375 |
| cg25449513 | NXPH2       | 2  | 1.19E-07   | 0.161521293 | 0.296776334 |
| cg19983775 | OAT         | 10 | 0.00034879 | 0.122997986 | 0.230225243 |

|            |               |    |            |             |             |
|------------|---------------|----|------------|-------------|-------------|
| cg05987567 | OCM           | 7  | 2.15E-18   | 0.230458656 | 0.503744043 |
| cg16873973 | OCM           | 7  | 2.42E-16   | 0.499241398 | 0.688131151 |
| cg22152667 | OCM2          | 7  | 7.93E-10   | 0.732826418 | 0.834857936 |
| cg16531386 | ODZ2          | 5  | 6.52E-17   | 0.233180804 | 0.554319882 |
| cg16434098 | ODZ2          | 5  | 7.43E-07   | 0.601558795 | 0.730683348 |
| cg00192966 | ODZ2          | 5  | 7.57E-06   | 0.199556995 | 0.30504825  |
| cg20122043 | OPCML         | 11 | 1.12E-12   | 0.359155902 | 0.520458406 |
| cg06398138 | OPCML         | 11 | 3.46E-10   | 0.52379611  | 0.655191935 |
| cg04745004 | OPCML         | 11 | 1.38E-06   | 0.544496002 | 0.650268922 |
| cg26936577 | OR10A5        | 11 | 2.72E-05   | 0.619441679 | 0.721821234 |
| cg07055879 | OR2A5         | 7  | 3.80E-08   | 0.134022543 | 0.243728932 |
| cg20201128 | OR51E2        | 11 | 2.62E-05   | 0.543594909 | 0.645246165 |
| cg23313445 | OR51F1        | 11 | 7.42E-08   | 0.488545796 | 0.62351942  |
| cg21966764 | OR52B2        | 11 | 4.31E-07   | 0.335297359 | 0.487358801 |
| cg25236050 | OR6C65        | 12 | 8.84E-09   | 0.70789374  | 0.811410085 |
| cg09293773 | OR9Q2;OR9C    | 11 | 0.00186059 | 0.595406053 | 0.707088504 |
| cg00797500 | PACRG;PACR    | 6  | 5.11E-13   | 0.518806655 | 0.807431099 |
| cg10584587 | PACRG;PACR    | 6  | 6.42E-17   | 0.567287931 | 0.811087518 |
| cg04978831 | PACRG;PACR    | 6  | 3.90E-11   | 0.601015947 | 0.748931701 |
| cg01941881 | PACS2;PACS2   | 14 | 0.00018085 | 0.361436211 | 0.473827991 |
| cg03612692 | PADI3         | 1  | 3.39E-07   | 0.38410513  | 0.490624144 |
| cg01923775 | PALLD;PALLD   | 4  | 0.0230163  | 0.530608657 | 0.636398742 |
| cg12729166 | PALMD         | 1  | 1.17E-10   | 0.386686097 | 0.597468018 |
| cg14648936 | PAN3;PAN3     | 13 | 5.24E-06   | 0.577075404 | 0.681530332 |
| cg08227786 | PARN;PARN     | 16 | 4.03E-07   | 0.54245147  | 0.680459255 |
| cg10787442 | PARP10        | 8  | 3.40E-06   | 0.534383569 | 0.646770413 |
| cg13518121 | PARVA         | 11 | 0.04867488 | 0.255751718 | 0.35799769  |
| cg01446894 | PAX1          | 20 | 6.24E-09   | 0.211367211 | 0.311491971 |
| cg24954809 | PAX2;PAX2;P   | 10 | 1.14E-14   | 0.25389957  | 0.385965392 |
| cg02981183 | PAX2;PAX2;P   | 10 | 1.11E-07   | 0.470883743 | 0.581617149 |
| cg24829778 | PAX3;PAX3;P   | 2  | 7.13E-05   | 0.228290813 | 0.357562602 |
| cg10738025 | PBX4          | 19 | 0.00048778 | 0.331838541 | 0.443042275 |
| cg18460830 | PCBP3;PCBP3   | 21 | 3.62E-05   | 0.212896864 | 0.329093306 |
| cg04636538 | PCDH18        | 4  | 6.17E-06   | 0.398641505 | 0.516914481 |
| cg21560241 | PCGEM1        | 2  | 8.76E-06   | 0.532251987 | 0.63483378  |
| cg13904968 | PCK1          | 20 | 9.51E-06   | 0.385102115 | 0.499961508 |
| cg22530111 | PCNXL2        | 1  | 8.57E-05   | 0.594398276 | 0.72099395  |
| cg22681709 | PDE11A;PDE11A | 2  | 0.00323041 | 0.331768    | 0.453978125 |
| cg08462879 | PDE4B;PDE4B   | 1  | 7.70E-05   | 0.303167766 | 0.418186822 |
| cg23094665 | PDE4D         | 5  | 7.41E-07   | 0.675700317 | 0.779341503 |
| cg27160952 | PDE9A;PDE9A   | 21 | 1.12E-07   | 0.70782611  | 0.843548525 |
| cg20210051 | PDZRN4;PDZRN4 | 12 | 2.26E-07   | 0.289910709 | 0.448306582 |
| cg26286901 | PEBP4         | 8  | 0.00018835 | 0.343206534 | 0.459639222 |
| cg19185544 | PEBP4         | 8  | 3.72E-08   | 0.540468018 | 0.644912882 |
| cg25401594 | PEG3;PEG3;P   | 19 | 1.16E-11   | 0.576044538 | 0.747095179 |
| cg19212949 | PEG3;PEG3;P   | 19 | 1.23E-10   | 0.334674467 | 0.504948814 |

|            |               |    |            |             |             |
|------------|---------------|----|------------|-------------|-------------|
| cg18706888 | PEG3;PEG3;Z   | 19 | 9.46E-07   | 0.284876449 | 0.402647329 |
| cg18668753 | PEG3;PEG3;Z   | 19 | 2.09E-06   | 0.318147462 | 0.435222272 |
| cg06581718 | PEX11G        | 19 | 5.73E-05   | 0.53575396  | 0.64033348  |
| cg15226608 | PEX5L         | 3  | 0.01425254 | 0.489949737 | 0.617231368 |
| cg07580620 | PGCP          | 8  | 4.10E-07   | 0.743334029 | 0.846172023 |
| cg04909257 | PGD           | 1  | 2.26E-06   | 0.586438146 | 0.689993006 |
| cg10129944 | PHACTR1       | 6  | 5.53E-11   | 0.262327226 | 0.430686849 |
| cg20548013 | PHACTR1       | 6  | 6.49E-15   | 0.165097356 | 0.329506437 |
| cg04274883 | PHACTR1       | 6  | 0.00277571 | 0.363909436 | 0.464602175 |
| cg20131219 | PHLDB2;PHLI   | 3  | 0.00441302 | 0.321491131 | 0.456396098 |
| cg13022129 | PHYHD1;PHY    | 9  | 1.33E-06   | 0.463508647 | 0.613217283 |
| cg09304624 | PI15          | 8  | 6.39E-06   | 0.35505808  | 0.509929046 |
| cg24200175 | PICALM;PICA   | 11 | 0.00639105 | 0.220754314 | 0.327517165 |
| cg25008444 | PIK3R1;PIK3F  | 5  | 4.52E-07   | 0.294684746 | 0.488774978 |
| cg16664523 | PIK3R1;PIK3F  | 5  | 2.47E-06   | 0.312322705 | 0.485435112 |
| cg18606375 | PITX1         | 5  | 1.37E-19   | 0.198719749 | 0.578589232 |
| cg00396667 | PITX1         | 5  | 2.62E-18   | 0.204429787 | 0.571131304 |
| cg04223420 | PITX1         | 5  | 2.98E-16   | 0.271043151 | 0.523026882 |
| cg04101060 | PITX1         | 5  | 3.76E-18   | 0.266421737 | 0.515400397 |
| cg05171952 | PITX1         | 5  | 1.32E-17   | 0.201411178 | 0.439508925 |
| cg07274716 | PITX1         | 5  | 6.66E-13   | 0.332886886 | 0.565795178 |
| cg02037307 | PITX1         | 5  | 1.66E-13   | 0.441013863 | 0.65640278  |
| cg12673103 | PITX1         | 5  | 1.27E-20   | 0.132379202 | 0.340180515 |
| cg23064601 | PITX1         | 5  | 5.73E-15   | 0.111370862 | 0.284981887 |
| cg21614303 | PITX1         | 5  | 2.50E-10   | 0.175402675 | 0.337765295 |
| cg22827250 | PITX1         | 5  | 4.45E-12   | 0.397155749 | 0.547350036 |
| cg08373003 | PITX1         | 5  | 4.99E-16   | 0.051829276 | 0.173341187 |
| cg09854515 | PITX2;PITX2   | 4  | 6.60E-14   | 0.252621743 | 0.536247267 |
| cg03184290 | PITX2;PITX2   | 4  | 2.54E-16   | 0.118977171 | 0.397442789 |
| cg09781994 | PITX2;PITX2   | 4  | 5.54E-15   | 0.152865498 | 0.416445149 |
| cg19829847 | PITX2;PITX2   | 4  | 8.97E-14   | 0.307148782 | 0.567683917 |
| cg26831119 | PITX2;PITX2   | 4  | 4.05E-14   | 0.161104361 | 0.413795703 |
| cg26708319 | PITX2;PITX2   | 4  | 5.22E-13   | 0.103014023 | 0.323335078 |
| cg23663774 | PITX2;PITX2   | 4  | 3.40E-14   | 0.135069753 | 0.334744179 |
| cg01951086 | PITX2;PITX2   | 4  | 1.03E-12   | 0.137102722 | 0.335965353 |
| cg02725370 | PITX2;PITX2   | 4  | 4.16E-12   | 0.10486106  | 0.303530001 |
| cg06842954 | PITX2;PITX2   | 4  | 3.03E-11   | 0.353105187 | 0.533096161 |
| cg24925400 | PITX2;PITX2   | 4  | 4.52E-09   | 0.12099225  | 0.293117875 |
| cg17707140 | PITX2;PITX2   | 4  | 3.87E-07   | 0.280775193 | 0.434684964 |
| cg13891220 | PITX2;PITX2   | 4  | 2.69E-08   | 0.118515191 | 0.268450577 |
| cg03943773 | PITX2;PITX2   | 4  | 4.50E-09   | 0.102600106 | 0.240408228 |
| cg19304088 | PITX2;PITX2   | 4  | 7.20E-09   | 0.106413242 | 0.241593316 |
| cg05581451 | PITX2;PITX2   | 4  | 1.36E-07   | 0.271423903 | 0.391155082 |
| cg13385016 | PITX2;PITX2;l | 4  | 5.34E-20   | 0.278593353 | 0.599158195 |
| cg20291436 | PITX2;PITX2;l | 4  | 7.45E-16   | 0.099378882 | 0.363461541 |
| cg10055501 | PITX2;PITX2;l | 4  | 1.19E-16   | 0.348220846 | 0.607408879 |



|            |               |    |            |             |             |
|------------|---------------|----|------------|-------------|-------------|
| cg22717014 | PITX2;PITX2;l | 4  | 3.62E-14   | 0.153315773 | 0.41193198  |
| cg17929238 | PITX2;PITX2;l | 4  | 5.00E-14   | 0.210707559 | 0.465069935 |
| cg22914729 | PITX2;PITX2;l | 4  | 3.80E-12   | 0.165931935 | 0.375189907 |
| cg08979895 | PITX2;PITX2;l | 4  | 1.94E-12   | 0.229322548 | 0.436647256 |
| cg27398720 | PITX2;PITX2;l | 4  | 2.40E-11   | 0.259932488 | 0.459636309 |
| cg21726372 | PITX2;PITX2;l | 4  | 1.21E-10   | 0.367929719 | 0.563986236 |
| cg03972665 | PITX2;PITX2;l | 4  | 1.75E-10   | 0.354745436 | 0.548134469 |
| cg05030680 | PITX2;PITX2;l | 4  | 9.48E-13   | 0.195076746 | 0.383910649 |
| cg05835105 | PITX2;PITX2;l | 4  | 1.09E-12   | 0.089721659 | 0.273862324 |
| cg03144922 | PITX2;PITX2;l | 4  | 9.21E-11   | 0.501988798 | 0.653998132 |
| cg01371072 | PITX2;PITX2;l | 4  | 2.54E-09   | 0.187182285 | 0.321794947 |
| cg13736376 | PITX2;PITX2;l | 4  | 8.89E-12   | 0.120100486 | 0.24098327  |
| cg14308375 | PITX2;PITX2;l | 4  | 5.80E-09   | 0.148735224 | 0.268548631 |
| cg16184803 | PITX2;PITX2;l | 4  | 4.51E-10   | 0.132761853 | 0.240050293 |
| cg17507671 | PITX2;PITX2;l | 4  | 7.15E-10   | 0.128002419 | 0.23328159  |
| cg27255329 | PKHD1;PKHD    | 6  | 3.20E-19   | 0.169299616 | 0.434958735 |
| cg10991450 | PKHD1;PKHD    | 6  | 4.02E-12   | 0.232026735 | 0.427753059 |
| cg08947151 | PKHD1;PKHD    | 6  | 1.72E-10   | 0.133110698 | 0.250300068 |
| cg01127059 | PKMYT1;PKM    | 16 | 8.25E-12   | 0.297883956 | 0.413047559 |
| cg04330122 | PLA1A         | 3  | 8.96E-12   | 0.484060845 | 0.68217956  |
| cg15362455 | PLA1A;PLA1A   | 3  | 2.50E-16   | 0.323202819 | 0.617766845 |
| cg04929165 | PLA2G4A       | 1  | 5.68E-07   | 0.341221801 | 0.442704556 |
| cg01507753 | PLB1;PLB1     | 2  | 1.96E-07   | 0.279469296 | 0.409337708 |
| cg17024257 | PLD1;PLD1     | 3  | 2.69E-09   | 0.184358383 | 0.297492049 |
| cg12636785 | PLD5          | 1  | 2.54E-11   | 0.20573813  | 0.335096101 |
| cg07132086 | PLEKHA2       | 8  | 0.00435477 | 0.239021636 | 0.339642966 |
| cg27247382 | PLEKHM3       | 2  | 3.86E-05   | 0.482967321 | 0.619216099 |
| cg16889945 | PLK5P         | 19 | 7.25E-09   | 0.19963458  | 0.310847245 |
| cg00545705 | PLXNA2        | 1  | 0.00017645 | 0.681749051 | 0.789486943 |
| cg24396875 | PMS1;PMS1;    | 2  | 2.42E-09   | 0.293619095 | 0.467358951 |
| cg04376782 | PNKD          | 2  | 2.93E-05   | 0.587379317 | 0.68746905  |
| cg12894984 | PNMT          | 17 | 1.52E-05   | 0.377775061 | 0.483186128 |
| cg21840908 | POR           | 7  | 8.17E-06   | 0.222770575 | 0.325153141 |
| cg22396959 | PPAP2B;PPAI   | 1  | 2.25E-05   | 0.285949282 | 0.406148588 |
| cg16738453 | PPAP2B;PPAI   | 1  | 0.00161298 | 0.427303646 | 0.537292839 |
| cg12180551 | PPAP2B;PPAI   | 1  | 0.00109456 | 0.514944527 | 0.619578521 |
| cg00679520 | PPM1H         | 12 | 9.97E-08   | 0.635047318 | 0.757924614 |
| cg25857569 | PPM1L         | 3  | 7.57E-07   | 0.510381288 | 0.688978152 |
| cg06574757 | PPM1L         | 3  | 1.15E-05   | 0.152795783 | 0.264515093 |
| cg20793532 | PPP2R2C;PPF   | 4  | 1.91E-05   | 0.228076914 | 0.350941839 |
| cg03847932 | PPP4R2        | 3  | 0.04790196 | 0.582624073 | 0.685574952 |
| cg04181189 | PRDM10;PRL    | 11 | 3.68E-13   | 0.612579015 | 0.756388036 |
| cg10484617 | PRDM16;PRL    | 1  | 5.10E-12   | 0.416369171 | 0.640663147 |
| cg04988794 | PRDM16;PRL    | 1  | 5.08E-08   | 0.435266088 | 0.589702398 |
| cg25372239 | PRDM16;PRL    | 1  | 6.18E-10   | 0.514668686 | 0.651164246 |
| cg06659980 | PRDM16;PRL    | 1  | 1.08E-07   | 0.445711398 | 0.571302317 |

|            |             |    |            |             |             |
|------------|-------------|----|------------|-------------|-------------|
| cg09271661 | PRDM16;PRC  | 1  | 2.37E-05   | 0.475251919 | 0.582152885 |
| cg12018140 | PRDM6       | 5  | 0.00053587 | 0.377703755 | 0.479277549 |
| cg19752143 | PREPL;PREPL | 2  | 0.00738808 | 0.319702399 | 0.420127117 |
| cg06349851 | PRICKLE2    | 3  | 6.83E-06   | 0.216110582 | 0.323009098 |
| cg03050508 | PRKCH       | 14 | 0.00962748 | 0.302092378 | 0.408520471 |
| cg26557925 | PRMT8       | 12 | 2.34E-08   | 0.615967597 | 0.769503066 |
| cg14499211 | PSD3;PSD3   | 8  | 3.06E-13   | 0.720390506 | 0.858690014 |
| cg16197388 | PSG3        | 19 | 5.57E-05   | 0.281453052 | 0.385586463 |
| cg09890374 | PSKH1       | 16 | 4.80E-08   | 0.239772554 | 0.369061301 |
| cg03172765 | PSMD1       | 2  | 0.00099807 | 0.462422497 | 0.611247662 |
| cg20460771 | PTAFR;PTAFF | 1  | 4.47E-07   | 0.361799407 | 0.482868455 |
| cg21545720 | PTP4A2;PTP4 | 1  | 9.02E-12   | 0.349997869 | 0.508053827 |
| cg17146731 | PTPN13;PTPN | 4  | 0.01772022 | 0.364269724 | 0.464779503 |
| cg06519061 | PTPN14      | 1  | 0.00654083 | 0.406901861 | 0.520797446 |
| cg00086113 | PTPN9       | 15 | 1.49E-07   | 0.699025531 | 0.810587639 |
| cg07215975 | PTPRE       | 10 | 3.95E-10   | 0.351643178 | 0.641619413 |
| cg19688761 | PTPRE       | 10 | 1.43E-11   | 0.244561155 | 0.524149027 |
| cg00238353 | PTPRE       | 10 | 0.0003069  | 0.158620438 | 0.268055215 |
| cg03361379 | PTPRN2;PTPF | 7  | 1.77E-14   | 0.185474894 | 0.386171358 |
| cg16477744 | PTPRN2;PTPF | 7  | 8.67E-13   | 0.164617945 | 0.306708187 |
| cg10310310 | PTPRN2;PTPF | 7  | 6.68E-11   | 0.153333703 | 0.273250625 |
| cg23694187 | PTPRN2;PTPF | 7  | 8.84E-15   | 0.430582193 | 0.712696309 |
| cg26075259 | PTPRN2;PTPF | 7  | 2.73E-13   | 0.380529936 | 0.629710826 |
| cg20717798 | PTPRN2;PTPF | 7  | 3.03E-10   | 0.493136337 | 0.665185501 |
| cg19434087 | PTPRN2;PTPF | 7  | 3.80E-15   | 0.208175399 | 0.377206145 |
| cg11128956 | PTPRN2;PTPF | 7  | 7.65E-13   | 0.193216863 | 0.358795366 |
| cg06188198 | PTPRN2;PTPF | 7  | 7.17E-05   | 0.595314324 | 0.756738693 |
| cg26267259 | PTPRN2;PTPF | 7  | 3.98E-11   | 0.326726298 | 0.48674859  |
| cg07267845 | PTPRN2;PTPF | 7  | 6.35E-10   | 0.37284374  | 0.526166192 |
| cg12866112 | PTPRN2;PTPF | 7  | 1.09E-08   | 0.249620984 | 0.401613615 |
| cg22128328 | PTPRN2;PTPF | 7  | 1.31E-05   | 0.275965964 | 0.426555536 |
| cg25387685 | PTPRN2;PTPF | 7  | 3.84E-06   | 0.44372007  | 0.593440931 |
| cg04336561 | PTPRN2;PTPF | 7  | 9.67E-07   | 0.604738065 | 0.74161353  |
| cg03900492 | PTPRN2;PTPF | 7  | 1.65E-05   | 0.358093118 | 0.489325851 |
| cg05319711 | PTPRN2;PTPF | 7  | 1.51E-11   | 0.437661982 | 0.566474907 |
| cg25910519 | PTPRN2;PTPF | 7  | 0.00017716 | 0.24303189  | 0.368597865 |
| cg06124066 | PTPRN2;PTPF | 7  | 0.00107935 | 0.619660007 | 0.744804521 |
| cg12656227 | PTPRN2;PTPF | 7  | 1.27E-05   | 0.607583126 | 0.727916068 |
| cg22960901 | PTPRN2;PTPF | 7  | 1.68E-06   | 0.337194356 | 0.454896312 |
| cg20809036 | PTPRN2;PTPF | 7  | 5.42E-05   | 0.298671741 | 0.414818903 |
| cg17614582 | PTPRN2;PTPF | 7  | 3.28E-05   | 0.449732795 | 0.56440749  |
| cg23235971 | PTPRN2;PTPF | 7  | 2.44E-06   | 0.547409136 | 0.659502725 |
| cg05437294 | PTPRN2;PTPF | 7  | 4.52E-07   | 0.487958296 | 0.599204838 |
| cg20083900 | PTPRN2;PTPF | 7  | 1.96E-08   | 0.441886663 | 0.551567508 |
| cg02394998 | PTPRN2;PTPF | 7  | 3.70E-09   | 0.622374295 | 0.730384307 |
| cg12582957 | PTPRN2;PTPF | 7  | 1.55E-07   | 0.65136691  | 0.756989284 |

|            |             |    |            |             |             |
|------------|-------------|----|------------|-------------|-------------|
| cg13816552 | PTPRN2;PTPF | 7  | 9.45E-06   | 0.517292418 | 0.622483925 |
| cg06339573 | PTPRN2;PTPF | 7  | 1.51E-07   | 0.107687367 | 0.210965242 |
| cg03476864 | PTPRN2;PTPF | 7  | 8.36E-09   | 0.252309722 | 0.353525623 |
| cg24830367 | PWP1        | 12 | 1.47E-05   | 0.590256574 | 0.702924401 |
| cg14497203 | RAB36       | 22 | 1.76E-05   | 0.315600753 | 0.449545119 |
| cg00714309 | RAB3B       | 1  | 8.67E-13   | 0.306213275 | 0.444445307 |
| cg26881535 | RAB3GAP2;A  | 1  | 0.0341158  | 0.259824664 | 0.36113853  |
| cg03461781 | RAGE        | 14 | 8.01E-05   | 0.33157625  | 0.475248282 |
| cg22395355 | RAI1        | 17 | 0.00386267 | 0.581988396 | 0.701577153 |
| cg09103877 | RAI1        | 17 | 0.00026516 | 0.34653611  | 0.447894655 |
| cg13096701 | RAPGEF2     | 4  | 0.00013269 | 0.125726873 | 0.239698448 |
| cg12894814 | RAPGEF5     | 7  | 4.48E-06   | 0.447681218 | 0.593317227 |
| cg10592478 | RARG;RARG   | 12 | 0.00074033 | 0.195361    | 0.316955623 |
| cg21109192 | RASGEF1C    | 5  | 5.05E-10   | 0.339891908 | 0.467679956 |
| cg25653165 | RASGEF1C    | 5  | 1.62E-12   | 0.391127623 | 0.506218367 |
| cg21730805 | RBM19       | 12 | 1.36E-09   | 0.401109391 | 0.541391017 |
| cg02066331 | RBM24;RBM   | 6  | 0.00107086 | 0.365237914 | 0.466253263 |
| cg16662785 | RBM9;RBM9   | 22 | 0.00627601 | 0.334355811 | 0.440679669 |
| cg05001531 | RBPM5;RBPM  | 8  | 1.12E-07   | 0.452751446 | 0.600496437 |
| cg03408619 | RBPM5;RBPM  | 8  | 6.63E-11   | 0.412027269 | 0.557509434 |
| cg12483927 | RD3;RD3     | 1  | 1.35E-11   | 0.708618696 | 0.833600406 |
| cg22596806 | RGS7        | 1  | 0.00049399 | 0.457165295 | 0.56674559  |
| cg20333869 | RHEB        | 7  | 0.01072952 | 0.389701518 | 0.490679804 |
| cg26163153 | RHOH        | 4  | 8.22E-07   | 0.520136358 | 0.650012909 |
| cg04131468 | RICH2       | 17 | 6.85E-05   | 0.595738409 | 0.708463936 |
| cg25737224 | RIMS1;RIMS1 | 6  | 1.50E-06   | 0.561992719 | 0.667325661 |
| cg23390920 | RMST        | 12 | 3.41E-06   | 0.387345091 | 0.547057519 |
| cg03782861 | RMST        | 12 | 2.28E-08   | 0.214713821 | 0.36850474  |
| cg27315341 | RMST        | 12 | 2.48E-06   | 0.164110272 | 0.295075588 |
| cg24810836 | RNASEH2A    | 19 | 5.18E-08   | 0.283995749 | 0.393187085 |
| cg05856398 | RNF133;CAD  | 7  | 1.41E-07   | 0.567326053 | 0.667510667 |
| cg22070232 | RNF144A     | 2  | 3.59E-05   | 0.343830167 | 0.464737406 |
| cg09195271 | RNF186      | 1  | 3.15E-06   | 0.48260057  | 0.639703388 |
| cg17135423 | RNF186      | 1  | 1.27E-08   | 0.535803596 | 0.650832378 |
| cg11519930 | RNF220      | 1  | 1.06E-05   | 0.366567866 | 0.485522343 |
| cg10329345 | RNF220      | 1  | 0.00015076 | 0.238758551 | 0.34878079  |
| cg01907837 | RNF8;RNF8   | 6  | 4.05E-08   | 0.327240398 | 0.481601312 |
| cg23126166 | RNLS;RNLS   | 10 | 0.00019193 | 0.476228965 | 0.587766946 |
| cg24899626 | RP1L1       | 8  | 2.72E-12   | 0.566988207 | 0.693343928 |
| cg11724759 | RPE65       | 1  | 8.41E-11   | 0.423549845 | 0.663802163 |
| cg23394916 | RPL22       | 1  | 1.07E-05   | 0.489929346 | 0.594461407 |
| cg00520612 | RPL24       | 3  | 3.20E-05   | 0.430768704 | 0.572541055 |
| cg00395501 | RPL5        | 1  | 3.86E-07   | 0.211326601 | 0.352402019 |
| cg05181927 | RPS24;RPS24 | 10 | 0.0053826  | 0.311945561 | 0.417312291 |
| cg12285184 | RPS6KA2     | 6  | 6.55E-12   | 0.348834651 | 0.614588476 |
| cg02669193 | RPS6KA2     | 6  | 1.77E-12   | 0.218739042 | 0.416097976 |

|            |               |    |            |             |             |
|------------|---------------|----|------------|-------------|-------------|
| cg15331383 | RPTOR;RPTO    | 17 | 8.89E-12   | 0.573272864 | 0.724629216 |
| cg06682763 | RSF1          | 11 | 8.62E-10   | 0.300096152 | 0.416586412 |
| cg12208848 | RSU1;RSU1     | 10 | 5.39E-08   | 0.472155053 | 0.616881311 |
| cg01558645 | RUFY3;RUFY3   | 4  | 1.31E-08   | 0.341563655 | 0.442997821 |
| cg11336061 | RUNX3;RUNX3   | 1  | 5.87E-07   | 0.629396295 | 0.795483552 |
| cg03769939 | RUNX3;RUNX3   | 1  | 2.45E-11   | 0.594316095 | 0.73977847  |
| cg08315421 | S100Z         | 5  | 1.94E-05   | 0.50416813  | 0.614739518 |
| cg17069828 | SAMD12;SAM    | 8  | 3.17E-13   | 0.212444606 | 0.442002334 |
| cg16514995 | SASS6;CCDC7   | 1  | 1.01E-07   | 0.519307839 | 0.69805066  |
| cg17398283 | SASS6;CCDC7   | 1  | 4.98E-07   | 0.584440917 | 0.749444117 |
| cg14846380 | SCARB1;SCAF   | 12 | 0.00424392 | 0.489045839 | 0.601893257 |
| cg09268718 | SCARF1;SCAF   | 17 | 0.01391883 | 0.325042139 | 0.43408667  |
| cg05650559 | SCHIP1        | 3  | 2.08E-12   | 0.311389143 | 0.568530732 |
| cg11595270 | SCN10A        | 3  | 2.85E-11   | 0.422517221 | 0.560385088 |
| cg09353052 | SCN1A;SCN1A   | 2  | 7.74E-05   | 0.330579366 | 0.430929031 |
| cg00877321 | SCT           | 11 | 0.00492772 | 0.687520806 | 0.798464337 |
| cg24862252 | SDC2          | 8  | 1.14E-06   | 0.268236098 | 0.406663455 |
| cg16962683 | SDC2          | 8  | 0.0177414  | 0.221803539 | 0.333414908 |
| cg17110767 | SDCCAG8       | 1  | 0.0110297  | 0.612897691 | 0.7153341   |
| cg18395354 | SDK1          | 7  | 4.25E-16   | 0.265348978 | 0.600949199 |
| cg21582785 | SDK1          | 7  | 1.66E-08   | 0.561470436 | 0.74386723  |
| cg00136968 | SDK1          | 7  | 1.63E-07   | 0.478097516 | 0.651735129 |
| cg25144558 | SDK1          | 7  | 4.51E-09   | 0.259785424 | 0.405659577 |
| cg13375629 | SDK1          | 7  | 1.09E-06   | 0.338729811 | 0.482190801 |
| cg19230787 | SDK1          | 7  | 4.56E-06   | 0.442814152 | 0.577670382 |
| cg18620306 | SDK1          | 7  | 1.55E-06   | 0.571687896 | 0.695391782 |
| cg15934004 | SDK1          | 7  | 0.00111637 | 0.447768145 | 0.562892684 |
| cg14682731 | SDK1          | 7  | 2.13E-07   | 0.686528469 | 0.796019365 |
| cg11535255 | SDK1;SDK1     | 7  | 6.26E-11   | 0.485270036 | 0.651841263 |
| cg24284741 | SDK1;SDK1     | 7  | 1.35E-05   | 0.459087774 | 0.611320127 |
| cg25207857 | SDK1;SDK1     | 7  | 3.16E-07   | 0.274602071 | 0.391950778 |
| cg08105834 | SDK1;SDK1     | 7  | 3.85E-07   | 0.244752071 | 0.358736236 |
| cg00958204 | SEC14L3       | 22 | 1.51E-08   | 0.666402212 | 0.789428135 |
| cg25750901 | SEC14L3       | 22 | 2.17E-09   | 0.234435527 | 0.340471663 |
| cg22758846 | SEC14L3       | 22 | 0.00015975 | 0.407443335 | 0.510314719 |
| cg07770360 | SEC14L5       | 16 | 1.49E-09   | 0.470433535 | 0.606634915 |
| cg03177729 | SEC31A;SEC31A | 4  | 0.0008076  | 0.21909468  | 0.324168789 |
| cg11051022 | SELO          | 22 | 3.09E-06   | 0.314765975 | 0.434051435 |
| cg09943050 | SEMA3A        | 7  | 0.00591779 | 0.292549844 | 0.396002203 |
| cg24214470 | SERPINF1      | 17 | 1.07E-12   | 0.479936501 | 0.602486307 |
| cg22513955 | SERPINF1      | 17 | 4.08E-11   | 0.298689438 | 0.401941384 |
| cg26922690 | SFMBT2        | 10 | 5.68E-10   | 0.388422049 | 0.574623923 |
| cg08858466 | SFMBT2        | 10 | 0.00058482 | 0.540467169 | 0.677735928 |
| cg22880392 | SFRP1         | 8  | 1.33E-06   | 0.272757646 | 0.392007458 |
| cg21087481 | SGCZ          | 8  | 0.00516328 | 0.303381279 | 0.404457398 |
| cg20812318 | SGIP1         | 1  | 7.34E-05   | 0.733584333 | 0.837178983 |

|            |              |    |            |             |             |
|------------|--------------|----|------------|-------------|-------------|
| cg21366688 | SGK1;SGK1;S  | 6  | 2.21E-12   | 0.416621144 | 0.592664187 |
| cg17284168 | SGK1;SGK1;S  | 6  | 2.82E-07   | 0.562476305 | 0.724649353 |
| cg18566177 | SGK1;SGK1;S  | 6  | 1.13E-10   | 0.628616903 | 0.774035866 |
| cg23080761 | SH2B3        | 12 | 9.97E-05   | 0.384566572 | 0.505433048 |
| cg14582501 | SH2D3C;SH2I  | 9  | 3.09E-08   | 0.519066533 | 0.624283594 |
| cg13883603 | SH2D3C;SH2I  | 9  | 0.00063427 | 0.322949842 | 0.423101323 |
| cg14624314 | SH3RF2       | 5  | 4.23E-07   | 0.651536381 | 0.751792384 |
| cg20955817 | SHANK2       | 11 | 1.92E-06   | 0.658961034 | 0.774555423 |
| cg04404381 | SHANK2       | 11 | 0.00194387 | 0.341813907 | 0.443416908 |
| cg08718050 | SHANK2       | 11 | 0.00013369 | 0.600761074 | 0.701532119 |
| cg27417997 | SHROOM3;SI   | 4  | 0.00068752 | 0.325729558 | 0.431765755 |
| cg08061360 | SIGLEC10;SIC | 19 | 1.33E-08   | 0.663221991 | 0.763640822 |
| cg12204166 | SIK3         | 11 | 2.44E-07   | 0.263456779 | 0.420635391 |
| cg08979319 | SIM1         | 6  | 4.80E-08   | 0.201167316 | 0.330106113 |
| cg06708634 | SIM1         | 6  | 1.36E-10   | 0.15984854  | 0.262005479 |
| cg12341475 | SIPA1;SIPA1  | 11 | 0.00016194 | 0.624228676 | 0.753091957 |
| cg24757937 | SIX1         | 14 | 7.13E-06   | 0.458475914 | 0.669554981 |
| cg10397765 | SIX1         | 14 | 9.35E-07   | 0.172071907 | 0.329406523 |
| cg09191335 | SLA2;SLA2    | 20 | 3.79E-08   | 0.560718139 | 0.687554116 |
| cg13119182 | SLC10A6      | 4  | 6.25E-07   | 0.12798793  | 0.239027823 |
| cg20872692 | SLC11A2      | 12 | 4.90E-11   | 0.248158526 | 0.44755654  |
| cg01008495 | SLC14A1;SLC  | 18 | 1.37E-08   | 0.555098263 | 0.687047935 |
| cg16251647 | SLC17A1;SLC  | 6  | 8.97E-15   | 0.218601327 | 0.427607458 |
| cg03369247 | SLC18A1;SLC  | 8  | 0.00030335 | 0.472165417 | 0.60386391  |
| cg23898998 | SLC22A3      | 6  | 0.00021213 | 0.548714874 | 0.662999341 |
| cg22944803 | SLC24A3;LOC  | 20 | 0.00033535 | 0.155041525 | 0.268501344 |
| cg10888399 | SLC25A18     | 22 | 2.37E-08   | 0.24371721  | 0.401287665 |
| cg20102010 | SLC25A38     | 3  | 0.00133973 | 0.677704192 | 0.805125743 |
| cg02557906 | SLC30A10     | 1  | 1.82E-16   | 0.276987127 | 0.427496182 |
| cg16785291 | SLC35B4      | 7  | 1.80E-06   | 0.241558213 | 0.361486494 |
| cg17898069 | SLC35F3      | 1  | 0.00017147 | 0.28752466  | 0.393942133 |
| cg22505977 | SLC36A2      | 5  | 7.85E-13   | 0.256317654 | 0.440553176 |
| cg23939642 | SLC38A10;SL  | 17 | 0.00915724 | 0.518269049 | 0.619146117 |
| cg01090358 | SLC39A13;SL  | 11 | 2.59E-09   | 0.398773987 | 0.506859354 |
| cg23726831 | SLC4A4;SLC4  | 4  | 2.28E-10   | 0.596730684 | 0.731276269 |
| cg19066171 | SLC4A4;SLC4  | 4  | 1.37E-05   | 0.312914871 | 0.426586118 |
| cg18447419 | SLC9A3       | 5  | 2.80E-05   | 0.462768272 | 0.607920636 |
| cg13525013 | SLIT1        | 10 | 7.39E-13   | 0.499026876 | 0.666193339 |
| cg16314733 | SLIT1        | 10 | 2.16E-07   | 0.327090978 | 0.449592518 |
| cg16813507 | SLIT1        | 10 | 0.00017708 | 0.654123351 | 0.760485748 |
| cg26168643 | SLITRK5      | 13 | 3.34E-05   | 0.347189459 | 0.468646899 |
| cg17971003 | SLN          | 11 | 0.00031943 | 0.483249652 | 0.584674918 |
| cg18750819 | SMARCAL1;S   | 2  | 4.73E-06   | 0.579432107 | 0.705237623 |
| cg10153733 | SMU1         | 9  | 7.19E-07   | 0.368554931 | 0.55308515  |
| cg00137696 | SND1         | 7  | 1.06E-08   | 0.514939944 | 0.652635939 |
| cg07555397 | SND1         | 7  | 0.01712804 | 0.448785835 | 0.558594396 |

|            |              |    |            |             |             |
|------------|--------------|----|------------|-------------|-------------|
| cg25332238 | SNRNP27      | 2  | 6.09E-10   | 0.349077922 | 0.574183242 |
| cg26495357 | SNTG2        | 2  | 4.22E-05   | 0.321853074 | 0.445450126 |
| cg14635303 | SNTG2        | 2  | 3.61E-08   | 0.551827456 | 0.66161261  |
| cg10036686 | SNX10        | 7  | 0.00043677 | 0.587433957 | 0.690347838 |
| cg18805164 | SNX26        | 19 | 0.02317501 | 0.315378256 | 0.44640793  |
| cg03204907 | SNX29        | 16 | 0.00157348 | 0.233952494 | 0.339386264 |
| cg17252780 | SNX4         | 3  | 6.89E-11   | 0.292009806 | 0.516246206 |
| cg10485411 | SNX8         | 7  | 0.00012304 | 0.269526967 | 0.394110821 |
| cg19497702 | SNX8         | 7  | 3.48E-05   | 0.375284156 | 0.479415861 |
| cg09805172 | SOHLH2       | 13 | 0.00017952 | 0.333299552 | 0.478101061 |
| cg25414209 | SOHLH2       | 13 | 0.00029793 | 0.355483688 | 0.479659615 |
| cg25804773 | SORBS1;SORI  | 10 | 0.00021414 | 0.331692846 | 0.439143293 |
| cg12848417 | SORCS1;SORI  | 10 | 1.61E-16   | 0.157270084 | 0.386255381 |
| cg04340567 | SORCS2       | 4  | 0.00076715 | 0.646286788 | 0.746792725 |
| cg21817179 | SOSTDC1      | 7  | 0.00153625 | 0.370355826 | 0.477001817 |
| cg17789809 | SOX2OT       | 3  | 0.00023239 | 0.724759309 | 0.824890563 |
| cg05156566 | SOX5         | 12 | 0.00061567 | 0.362652976 | 0.502844229 |
| cg21992400 | SOX6;SOX6;S  | 11 | 4.60E-05   | 0.161015821 | 0.296053227 |
| cg12489915 | SPAG9;SPAG   | 17 | 4.99E-05   | 0.5210075   | 0.642141911 |
| cg16760223 | SPATA16      | 3  | 1.72E-08   | 0.313975255 | 0.515222447 |
| cg03347153 | SPATA16      | 3  | 5.57E-08   | 0.226276765 | 0.37329988  |
| cg10491122 | SPATA17      | 1  | 3.71E-08   | 0.622245182 | 0.753513424 |
| cg08866865 | SPATS2L;SPA  | 2  | 4.79E-09   | 0.454046292 | 0.635056581 |
| cg01539849 | SPI1;SPI1    | 11 | 0.00038752 | 0.230914939 | 0.350711811 |
| cg13554018 | SPIN1        | 9  | 8.15E-12   | 0.32681734  | 0.442342376 |
| cg15374435 | SPRY2        | 13 | 4.47E-05   | 0.21777124  | 0.343688288 |
| cg22369786 | SPRY2        | 13 | 0.0006918  | 0.257861232 | 0.367138247 |
| cg02713162 | SPRY4;SPRY4  | 5  | 0.01591192 | 0.406163649 | 0.515651115 |
| cg07037725 | SPRY4;SPRY4  | 5  | 1.53E-05   | 0.219530598 | 0.321716972 |
| cg15081033 | SPSB4        | 3  | 2.73E-06   | 0.692525112 | 0.7951142   |
| cg05940425 | SPTB;SPTB    | 14 | 7.72E-10   | 0.568783158 | 0.787519049 |
| cg18745217 | SRD5A3       | 4  | 3.89E-05   | 0.665961541 | 0.790228801 |
| cg14898243 | SRGN         | 10 | 0.00031654 | 0.463139472 | 0.602504498 |
| cg13645409 | SRGN         | 10 | 1.03E-05   | 0.546760399 | 0.676597791 |
| cg06041695 | SRGN         | 10 | 6.90E-08   | 0.370424183 | 0.481279225 |
| cg03833429 | SRL          | 16 | 7.10E-08   | 0.293748297 | 0.417687371 |
| cg26591162 | SRL          | 16 | 1.46E-07   | 0.451069823 | 0.570035865 |
| cg05714396 | SSBP2        | 5  | 0.00305905 | 0.466959481 | 0.571527265 |
| cg04660157 | SSPN;SSPN    | 12 | 6.86E-06   | 0.406392631 | 0.570429678 |
| cg03389133 | SSTR3        | 22 | 1.19E-05   | 0.203936818 | 0.306515749 |
| cg06422039 | SSTR5;LOC14  | 16 | 0.00067877 | 0.167984064 | 0.269461915 |
| cg00186954 | ST5;C11orf17 | 11 | 0.00520589 | 0.534916971 | 0.657997525 |
| cg20638140 | ST6GAL2;ST6  | 2  | 4.90E-08   | 0.465088193 | 0.575203615 |
| cg05576619 | ST8SIA6      | 10 | 1.14E-08   | 0.124711975 | 0.226914325 |
| cg11022926 | STK17A       | 7  | 9.46E-05   | 0.128381959 | 0.230824456 |
| cg27612126 | STK32B       | 4  | 0.0194682  | 0.35398959  | 0.45805578  |

|            |              |    |            |             |             |
|------------|--------------|----|------------|-------------|-------------|
| cg09712756 | STL          | 6  | 6.48E-11   | 0.674412095 | 0.818811094 |
| cg02081305 | SULT6B1      | 2  | 3.14E-05   | 0.345521757 | 0.507227005 |
| cg04584761 | SUPT7L       | 2  | 0.03559596 | 0.508323975 | 0.665528461 |
| cg11634248 | SUV420H1     | 11 | 4.19E-10   | 0.660252262 | 0.789487006 |
| cg12536880 | SV2B;SV2B    | 15 | 2.15E-07   | 0.518470662 | 0.679555965 |
| cg00593008 | SV2C         | 5  | 4.86E-09   | 0.326961776 | 0.525235987 |
| cg27054032 | SV2C         | 5  | 2.62E-06   | 0.591646183 | 0.746406587 |
| cg00590173 | SV2C         | 5  | 2.32E-05   | 0.613216706 | 0.715008846 |
| cg23601468 | SYN3;SYN3;T  | 22 | 0.00010173 | 0.334896692 | 0.459755398 |
| cg07586863 | SYNE1;SYNE1  | 6  | 6.54E-10   | 0.369549703 | 0.609985974 |
| cg13219552 | SYNE1;SYNE1  | 6  | 4.58E-05   | 0.33042167  | 0.527445125 |
| cg09516930 | SYNE1;SYNE1  | 6  | 1.73E-07   | 0.231613835 | 0.393078601 |
| cg15957341 | SYT9         | 11 | 3.94E-09   | 0.228645271 | 0.367800963 |
| cg01963906 | SYTL1        | 1  | 0.00010087 | 0.410422403 | 0.530609619 |
| cg15731317 | SYTL2;SYTL2; | 11 | 0.00022104 | 0.250813073 | 0.352527401 |
| cg18243910 | TAP2;TAP2    | 6  | 0.00044744 | 0.485747793 | 0.595771748 |
| cg10862567 | TBCD         | 17 | 1.97E-05   | 0.246992993 | 0.394389953 |
| cg03955537 | TBCD         | 17 | 0.00148376 | 0.281505909 | 0.402496753 |
| cg16450577 | TBCD         | 17 | 0.00392239 | 0.306526978 | 0.421345825 |
| cg19081021 | TBCEL;TBCEL  | 11 | 4.07E-05   | 0.420248779 | 0.527350561 |
| cg10714160 | TBL1XR1      | 3  | 0.01141891 | 0.236732548 | 0.341562189 |
| cg25900280 | TBX4         | 17 | 3.71E-12   | 0.188132204 | 0.399777499 |
| cg24274579 | TBX4         | 17 | 5.82E-11   | 0.150021543 | 0.306294638 |
| cg03969651 | TBX4         | 17 | 1.67E-07   | 0.588017743 | 0.7325741   |
| cg14011845 | TBX4         | 17 | 1.09E-07   | 0.191085884 | 0.326887081 |
| cg06365535 | TBX4         | 17 | 6.60E-07   | 0.399435664 | 0.526917486 |
| cg07876611 | TBX4         | 17 | 0.00132534 | 0.55642318  | 0.66779389  |
| cg14823851 | TBX4         | 17 | 3.26E-09   | 0.112635301 | 0.222904771 |
| cg10592734 | TBXAS1;TBX4  | 7  | 8.41E-15   | 0.391158991 | 0.58368914  |
| cg03764092 | TBXAS1;TBX4  | 7  | 1.93E-07   | 0.473345441 | 0.580777328 |
| cg23523359 | TCERG1L      | 10 | 1.21E-14   | 0.318595339 | 0.713879272 |
| cg26256560 | TCERG1L      | 10 | 2.52E-15   | 0.537492512 | 0.724064078 |
| cg14047630 | TCERG1L      | 10 | 4.98E-11   | 0.6586524   | 0.803222957 |
| cg01604628 | TCF7L2;TCF7  | 10 | 0.00041277 | 0.591198197 | 0.717063679 |
| cg13206028 | TCF7L2;TCF7  | 10 | 8.16E-05   | 0.343727106 | 0.466922872 |
| cg12262181 | TCF7L2;TCF7  | 10 | 0.00037968 | 0.271105984 | 0.391537453 |
| cg04322596 | TCF7L2;TCF7  | 10 | 0.00141567 | 0.282107543 | 0.39529375  |
| cg08417313 | TCN1         | 11 | 2.05E-09   | 0.380548512 | 0.539857233 |
| cg01489256 | TDH          | 8  | 0.00069916 | 0.498391388 | 0.602796951 |
| cg03709468 | TDO2         | 4  | 2.01E-07   | 0.167452642 | 0.339411999 |
| cg05229035 | TECPR2       | 14 | 1.79E-06   | 0.352960532 | 0.465140126 |
| cg20939319 | TEX15        | 8  | 0.00017169 | 0.178138347 | 0.278243693 |
| cg24606807 | TFF1         | 21 | 0.00147798 | 0.457521869 | 0.56644906  |
| cg20698667 | TGFB2;TGFB2  | 1  | 0.00073276 | 0.214789856 | 0.316555226 |
| cg19763108 | THRB;THRB;1  | 3  | 1.11E-05   | 0.232666087 | 0.352852332 |
| cg16201899 | THSD1P       | 13 | 2.96E-05   | 0.352173856 | 0.470511145 |

|            |              |    |            |             |             |
|------------|--------------|----|------------|-------------|-------------|
| cg27090087 | TINAG        | 6  | 1.46E-08   | 0.424014088 | 0.638749557 |
| cg09747445 | TLE3;TLE3;TL | 15 | 2.11E-07   | 0.323032455 | 0.509338579 |
| cg13598109 | TLE4         | 9  | 0.00037194 | 0.321455719 | 0.438856825 |
| cg20956411 | TLK1         | 2  | 0.00054033 | 0.345878574 | 0.45274357  |
| cg10589034 | TLL2         | 10 | 4.34E-08   | 0.515694625 | 0.658752071 |
| cg04547433 | TMC7;TMC7    | 16 | 3.80E-08   | 0.525989154 | 0.705263498 |
| cg23112464 | TMCO3        | 13 | 1.83E-08   | 0.497249648 | 0.676929705 |
| cg05855124 | TMEM132C     | 12 | 3.46E-09   | 0.317870331 | 0.560742046 |
| cg17062305 | TMEM132C     | 12 | 1.12E-12   | 0.238610822 | 0.40374063  |
| cg14479837 | TMEM132C     | 12 | 1.05E-13   | 0.185081808 | 0.324018699 |
| cg17734698 | TMEM132C     | 12 | 2.20E-13   | 0.159856831 | 0.284753995 |
| cg03685843 | TMEM132D     | 12 | 1.28E-12   | 0.169081344 | 0.326946009 |
| cg11023224 | TMEM132D     | 12 | 1.72E-05   | 0.356060874 | 0.489571771 |
| cg26364947 | TMEM132D     | 12 | 5.08E-09   | 0.513496869 | 0.634195901 |
| cg13090220 | TMEM132D     | 12 | 0.00027631 | 0.563210695 | 0.670542765 |
| cg04476764 | TMEM155      | 4  | 1.55E-07   | 0.331076404 | 0.475344166 |
| cg18027903 | TMEM195;TI   | 7  | 4.42E-06   | 0.284328698 | 0.401023521 |
| cg01323706 | TMEM209      | 7  | 0.00017065 | 0.462463952 | 0.58878498  |
| cg18946437 | TMEM211      | 22 | 5.25E-06   | 0.479317596 | 0.612618948 |
| cg00175735 | TMEM30C;TI   | 3  | 0.02437647 | 0.261781159 | 0.367560365 |
| cg12177299 | TMEM62       | 15 | 0.00023751 | 0.311933257 | 0.450666248 |
| cg17977470 | TMEM88       | 17 | 0.00095177 | 0.226473765 | 0.330605332 |
| cg14148156 | TMEM8B;TM    | 9  | 0.00329114 | 0.464455929 | 0.571264169 |
| cg21265427 | TMEM99       | 17 | 0.00010895 | 0.525545094 | 0.639839546 |
| cg26673722 | TMPRSS11A;   | 4  | 0.00811016 | 0.456628273 | 0.56791923  |
| cg01232726 | TMPRSS5      | 11 | 0.00138926 | 0.32858086  | 0.433193817 |
| cg12487792 | TMX3;CCDC1   | 18 | 1.10E-05   | 0.254831491 | 0.369733388 |
| cg26305729 | TNFAIP8      | 5  | 0.0022634  | 0.577130967 | 0.684253851 |
| cg14187242 | TNFSF8       | 9  | 7.06E-06   | 0.198481939 | 0.3410469   |
| cg05643339 | TNN          | 1  | 0.00609132 | 0.390576206 | 0.492648019 |
| cg06459913 | TNP2         | 16 | 2.55E-06   | 0.422773516 | 0.557072024 |
| cg05794556 | TNS3         | 7  | 4.46E-13   | 0.243476659 | 0.467478005 |
| cg04879211 | TNS3         | 7  | 1.20E-05   | 0.235489192 | 0.404025531 |
| cg13199127 | TNXB         | 6  | 3.51E-06   | 0.155671418 | 0.255875482 |
| cg03466237 | TOLLIP       | 11 | 0.00542165 | 0.420686194 | 0.539712576 |
| cg25181854 | TOLLIP       | 11 | 2.19E-08   | 0.449111226 | 0.550093648 |
| cg22213449 | TOMM7        | 7  | 1.39E-10   | 0.248795496 | 0.475310535 |
| cg01502373 | TOP1P2;PIWI  | 22 | 1.63E-13   | 0.264815697 | 0.467014847 |
| cg26126740 | TOX2;TOX2;T  | 20 | 2.24E-10   | 0.4110222   | 0.544750374 |
| cg02004723 | TOX2;TOX2;T  | 20 | 9.07E-10   | 0.631733946 | 0.761205793 |
| cg11646638 | TP53I3;TP53I | 2  | 5.30E-12   | 0.436729861 | 0.639898148 |
| cg10366018 | TRAF3IP1;TR  | 2  | 0.00040718 | 0.470968787 | 0.594561575 |
| cg04840339 | TRDN         | 6  | 4.19E-07   | 0.652047502 | 0.758293068 |
| cg09103187 | TRERF1       | 6  | 1.00E-08   | 0.162602684 | 0.331780562 |
| cg17173166 | TRH          | 3  | 0.00180967 | 0.392931041 | 0.51025435  |
| cg21155973 | TRHDE        | 12 | 1.26E-06   | 0.164886927 | 0.27808826  |



|            |              |    |            |             |             |
|------------|--------------|----|------------|-------------|-------------|
| cg27610545 | TRHDE        | 12 | 0.00246417 | 0.498773862 | 0.600396187 |
| cg00551143 | TRIL         | 7  | 0.00030441 | 0.42060939  | 0.536085351 |
| cg07805064 | TRIM40       | 6  | 0.00535575 | 0.564555722 | 0.673434084 |
| cg05389989 | TRIM40       | 6  | 0.00101924 | 0.584302695 | 0.687091992 |
| cg26700215 | TRIM55;TRIM  | 8  | 4.35E-07   | 0.281454034 | 0.426132373 |
| cg04507915 | TRIM71       | 3  | 1.07E-11   | 0.356731949 | 0.526853544 |
| cg27195956 | TRIM71       | 3  | 1.45E-05   | 0.424788827 | 0.546582406 |
| cg15630071 | TRIM71       | 3  | 1.86E-09   | 0.386723606 | 0.494704221 |
| cg26689441 | TRIO         | 5  | 4.79E-05   | 0.422179005 | 0.543468649 |
| cg09161330 | TROVE2;TRO   | 1  | 1.51E-11   | 0.328312981 | 0.503812611 |
| cg14165911 | TRPM3        | 9  | 0.0001602  | 0.542287292 | 0.693818685 |
| cg14265537 | TRPM3;TRPM   | 9  | 0.0002377  | 0.217288006 | 0.320865797 |
| cg09618387 | TSKS         | 19 | 1.72E-07   | 0.354182576 | 0.545175356 |
| cg01553935 | TSPAN1;TSPA  | 1  | 7.36E-13   | 0.183536538 | 0.303431998 |
| cg24610425 | TSPAN12      | 7  | 1.31E-05   | 0.250324141 | 0.356023648 |
| cg27159916 | TSPAN16      | 19 | 0.00053427 | 0.312982343 | 0.421115539 |
| cg27304204 | TSPAN8       | 12 | 9.78E-08   | 0.289746604 | 0.492940968 |
| cg15645660 | TTC22        | 1  | 0.00081736 | 0.22785792  | 0.332348898 |
| cg03174228 | TTLL11       | 9  | 9.20E-08   | 0.325064631 | 0.452643355 |
| cg21184518 | TTLL11;TTLL1 | 9  | 0.00036065 | 0.269218268 | 0.370756761 |
| cg18788205 | TTPAL;TTPAL  | 20 | 3.62E-12   | 0.425224667 | 0.697425546 |
| cg05036502 | TXNDC11      | 16 | 2.95E-09   | 0.648222814 | 0.779730534 |
| cg02340615 | TXNRD1       | 12 | 1.45E-12   | 0.450416393 | 0.688491777 |
| cg14802400 | TXNRD1       | 12 | 0.00202181 | 0.633923882 | 0.752868259 |
| cg08869857 | TXNRD1;TXN   | 12 | 2.07E-06   | 0.367228786 | 0.507246215 |
| cg07515324 | TYK2         | 19 | 5.82E-14   | 0.616445797 | 0.741924156 |
| cg26229593 | UBIAD1       | 1  | 3.61E-09   | 0.462337657 | 0.687613825 |
| cg14136260 | UCP3         | 11 | 4.70E-11   | 0.21243686  | 0.418274202 |
| cg12363671 | UMODL1;UM    | 21 | 3.28E-06   | 0.411267424 | 0.534119933 |
| cg00349542 | UMODL1;UM    | 21 | 7.82E-05   | 0.536432845 | 0.656385205 |
| cg23603057 | UNC93A;UNC   | 6  | 1.02E-05   | 0.413285232 | 0.541667279 |
| cg24759654 | USP36        | 17 | 6.34E-08   | 0.233938371 | 0.397093847 |
| cg07385573 | USP36        | 17 | 3.35E-06   | 0.617715865 | 0.727936834 |
| cg01834573 | UTRN         | 6  | 0.00012711 | 0.290273353 | 0.418697753 |
| cg00223767 | UVRAG        | 11 | 2.15E-05   | 0.39927865  | 0.571999277 |
| cg23752985 | VAMP8        | 2  | 2.32E-12   | 0.274479153 | 0.446144447 |
| cg10283182 | VAT1L        | 16 | 2.94E-06   | 0.508135761 | 0.628078093 |
| cg04743650 | VCAM1;VCAI   | 1  | 2.80E-05   | 0.233492901 | 0.357179651 |
| cg26496628 | VCAN;VCAN;   | 5  | 0.00201618 | 0.378382466 | 0.484386365 |
| cg02073081 | VGLL4        | 3  | 5.28E-05   | 0.207412244 | 0.312836956 |
| cg18005261 | VIPR2        | 7  | 2.47E-07   | 0.435298366 | 0.570449489 |
| cg18425653 | VIPR2        | 7  | 1.93E-06   | 0.279051611 | 0.393565976 |
| cg06878663 | VIPR2        | 7  | 1.34E-07   | 0.484581131 | 0.589148155 |
| cg25957092 | VPS37B       | 12 | 1.17E-05   | 0.510064775 | 0.651045776 |
| cg26249100 | VPS37B       | 12 | 0.000539   | 0.67443427  | 0.777000604 |
| cg20307292 | VWA3B        | 2  | 3.76E-05   | 0.47281975  | 0.585618273 |

|            |                 |    |            |             |             |
|------------|-----------------|----|------------|-------------|-------------|
| cg14643415 | WDR49           | 3  | 1.76E-07   | 0.46263985  | 0.568478689 |
| cg00519320 | WDR59           | 16 | 3.50E-06   | 0.285490182 | 0.393212463 |
| cg06082598 | WDR64           | 1  | 8.87E-09   | 0.265567473 | 0.465121973 |
| cg05940691 | WDR64           | 1  | 4.41E-06   | 0.452014678 | 0.619333976 |
| cg07233230 | WDR64           | 1  | 1.89E-05   | 0.540263534 | 0.667701173 |
| cg08103216 | WDR69           | 2  | 0.00064374 | 0.401948284 | 0.50812594  |
| cg15446884 | WDR86           | 7  | 2.01E-05   | 0.548350322 | 0.649261111 |
| cg22654935 | WDR88           | 19 | 8.38E-06   | 0.6325144   | 0.758909389 |
| cg02579136 | WNT11           | 11 | 1.73E-11   | 0.152104421 | 0.263904133 |
| cg25449821 | WSCD1           | 17 | 5.76E-08   | 0.56608388  | 0.682058731 |
| cg20792590 | WSCD1           | 17 | 1.13E-06   | 0.214147976 | 0.326219373 |
| cg08091526 | WVOX            | 16 | 7.83E-09   | 0.375874589 | 0.515518203 |
| cg09038266 | WVOX            | 16 | 1.20E-06   | 0.464843226 | 0.591513666 |
| cg00469083 | WVOX            | 16 | 6.67E-05   | 0.602723885 | 0.71714809  |
| cg03419151 | XAF1;XAF1       | 17 | 0.00017618 | 0.291256228 | 0.398475069 |
| cg19743666 | YPEL5;YPEL5     | 2  | 4.75E-05   | 0.431101409 | 0.546687991 |
| cg25298754 | ZBED2;CD96;     | 3  | 2.11E-11   | 0.284432434 | 0.460009089 |
| cg27330193 | ZBTB20;ZBTE     | 3  | 1.12E-05   | 0.393156612 | 0.524576996 |
| cg13705556 | ZBTB7A          | 19 | 7.67E-06   | 0.226791998 | 0.347524368 |
| cg00569808 | ZCCHC14         | 16 | 4.43E-09   | 0.461176402 | 0.724447326 |
| cg00601743 | ZCCHC14         | 16 | 2.50E-09   | 0.590517445 | 0.76201229  |
| cg07630229 | ZCCHC14         | 16 | 1.76E-13   | 0.532023871 | 0.685828392 |
| cg07448824 | ZCCHC14         | 16 | 2.44E-05   | 0.742956675 | 0.85020536  |
| cg00283857 | ZDHHC14;ZD      | 6  | 9.89E-05   | 0.254607282 | 0.412658008 |
| cg09484852 | ZDHHC14;ZD      | 6  | 0.00155877 | 0.476851154 | 0.604343132 |
| cg05956452 | ZDHHC14;ZD      | 6  | 1.96E-07   | 0.347331786 | 0.461910143 |
| cg25578048 | ZDHHC14;ZD      | 6  | 0.00291345 | 0.494650308 | 0.602465466 |
| cg22618752 | ZEB2;ZEB2       | 2  | 5.44E-07   | 0.440033618 | 0.567321271 |
| cg14807945 | ZEB2;ZEB2       | 2  | 5.67E-06   | 0.420885683 | 0.525958045 |
| cg14364926 | ZER1            | 9  | 9.06E-11   | 0.246282269 | 0.376782986 |
| cg06185532 | ZFHX3;ZFHX3     | 16 | 1.13E-11   | 0.324039278 | 0.534091145 |
| cg04364695 | ZMAT4;ZMAT4     | 8  | 0.00012871 | 0.495269757 | 0.602897043 |
| cg02970775 | ZMYND19         | 9  | 1.48E-08   | 0.330120918 | 0.497615926 |
| cg11112729 | ZNF212          | 7  | 4.38E-07   | 0.221005433 | 0.338258587 |
| cg12023844 | ZNF286A;ZNF286A | 17 | 0.00045324 | 0.518747821 | 0.620678172 |
| cg08360666 | ZNF343          | 20 | 4.71E-05   | 0.176153741 | 0.278849976 |
| cg05677224 | ZNF510          | 9  | 1.12E-08   | 0.653637053 | 0.830817268 |
| cg20299690 | ZNF521          | 18 | 3.54E-07   | 0.489991683 | 0.669783231 |
| cg11729074 | ZNF521          | 18 | 3.97E-07   | 0.313518012 | 0.490287207 |
| cg01875596 | ZNF521          | 18 | 0.02200868 | 0.324212231 | 0.427438988 |
| cg01094891 | ZNF536          | 19 | 6.22E-16   | 0.235725841 | 0.520803434 |
| cg03724752 | ZNF671          | 19 | 5.30E-13   | 0.384830556 | 0.654383919 |
| cg24078554 | ZNF697          | 1  | 7.12E-07   | 0.354215568 | 0.519776777 |
| cg18586867 | ZNF738          | 19 | 3.76E-05   | 0.282561907 | 0.417170313 |
| cg25961952 |                 | 5  | 2.92E-14   | 0.32768782  | 0.714247558 |
| cg10214640 |                 | 16 | 4.31E-16   | 0.284310932 | 0.640947618 |

|            |    |          |             |             |
|------------|----|----------|-------------|-------------|
| cg11595635 | 5  | 5.34E-20 | 0.153619309 | 0.508804408 |
| cg23793104 | 4  | 2.73E-15 | 0.196926003 | 0.527303613 |
| cg02691343 | 3  | 1.27E-12 | 0.298188555 | 0.617641534 |
| cg22122321 | 4  | 1.11E-15 | 0.306543971 | 0.621614783 |
| cg27325820 | 5  | 2.01E-14 | 0.296728369 | 0.607422733 |
| cg20301678 | 6  | 4.45E-10 | 0.500520564 | 0.804766055 |
| cg13744172 | 16 | 3.43E-12 | 0.170810795 | 0.47323571  |
| cg17765553 | 8  | 8.22E-11 | 0.387863355 | 0.688781589 |
| cg24650748 | 5  | 3.55E-17 | 0.448260703 | 0.747199289 |
| cg00316839 | 4  | 2.02E-16 | 0.199452226 | 0.496113964 |
| cg15916160 | 16 | 7.60E-15 | 0.15886604  | 0.453508021 |
| cg05317090 | 16 | 4.86E-16 | 0.25873698  | 0.552597388 |
| cg00747944 | 16 | 1.05E-14 | 0.183263964 | 0.471872271 |
| cg08474859 | 4  | 5.13E-16 | 0.140975656 | 0.428298375 |
| cg02676167 | 2  | 2.21E-14 | 0.246383388 | 0.531271933 |
| cg02924234 | 2  | 6.73E-12 | 0.301538589 | 0.584142587 |
| cg08950105 | 9  | 2.42E-17 | 0.226293114 | 0.507799997 |
| cg08548659 | 4  | 2.26E-11 | 0.307104499 | 0.585667681 |
| cg21199629 | 14 | 4.59E-13 | 0.208598238 | 0.486317876 |
| cg03475509 | 4  | 9.08E-13 | 0.285262409 | 0.554675457 |
| cg26190381 | 10 | 1.16E-13 | 0.336949155 | 0.602758411 |
| cg25942318 | 2  | 2.86E-14 | 0.516219122 | 0.779462864 |
| cg06138439 | 16 | 1.51E-13 | 0.299042686 | 0.561104721 |
| cg22926923 | 14 | 8.91E-10 | 0.519837923 | 0.781369882 |
| cg06551595 | 18 | 1.85E-12 | 0.205415148 | 0.463877489 |
| cg26277754 | 5  | 1.08E-16 | 0.193166782 | 0.450983338 |
| cg04329088 | 2  | 4.23E-13 | 0.346345906 | 0.602095889 |
| cg07673740 | 4  | 1.15E-11 | 0.164764253 | 0.418900102 |
| cg16387593 | 16 | 3.17E-13 | 0.339050567 | 0.592626167 |
| cg22869030 | 4  | 4.60E-16 | 0.123528299 | 0.37576991  |
| cg16230352 | 8  | 1.11E-15 | 0.341072712 | 0.593151283 |
| cg10426234 | 12 | 1.01E-11 | 0.578660096 | 0.828387128 |
| cg05308317 | 14 | 4.90E-09 | 0.575640347 | 0.824951649 |
| cg19533958 | 5  | 1.14E-14 | 0.342016653 | 0.590756438 |
| cg19982221 | 6  | 1.82E-11 | 0.218776031 | 0.464237833 |
| cg10552446 | 2  | 1.24E-12 | 0.312987667 | 0.557922948 |
| cg19549171 | 3  | 1.46E-14 | 0.327724069 | 0.572287122 |
| cg01020413 | 2  | 1.05E-13 | 0.395889819 | 0.638023697 |
| cg03988540 | 4  | 4.59E-13 | 0.242770333 | 0.484229815 |
| cg10536898 | 5  | 3.67E-17 | 0.244097226 | 0.485131533 |
| cg11241663 | 2  | 1.14E-14 | 0.250294776 | 0.489226156 |
| cg23697093 | 14 | 1.11E-15 | 0.252013226 | 0.489688246 |
| cg05774141 | 7  | 1.26E-16 | 0.481815924 | 0.718340702 |
| cg07331478 | 2  | 1.58E-10 | 0.38401381  | 0.619637762 |
| cg13670898 | 14 | 6.05E-12 | 0.303869792 | 0.539431904 |
| cg21442730 | 13 | 7.09E-14 | 0.405590861 | 0.641152883 |

|            |    |          |             |             |
|------------|----|----------|-------------|-------------|
| cg05464506 | 2  | 1.77E-11 | 0.26287923  | 0.497201361 |
| cg19246977 | 17 | 1.34E-10 | 0.483013178 | 0.716877131 |
| cg13988455 | 10 | 3.80E-13 | 0.232247884 | 0.465416623 |
| cg21944740 | 5  | 1.22E-14 | 0.398260455 | 0.631063982 |
| cg02311193 | 17 | 1.54E-10 | 0.288996703 | 0.52088408  |
| cg18156686 | 10 | 6.86E-09 | 0.494199925 | 0.725635941 |
| cg12165219 | 8  | 1.63E-07 | 0.441887787 | 0.673223527 |
| cg10830616 | 12 | 9.20E-13 | 0.189093663 | 0.419694828 |
| cg02216535 | 4  | 4.04E-10 | 0.303542114 | 0.533992001 |
| cg14684925 | 19 | 1.44E-09 | 0.44772408  | 0.677958246 |
| cg01961105 | 16 | 2.05E-09 | 0.455961223 | 0.685441134 |
| cg14449958 | 14 | 3.17E-12 | 0.319471226 | 0.548602745 |
| cg21082028 | 17 | 1.33E-08 | 0.420501748 | 0.649249047 |
| cg01047631 | 16 | 2.13E-14 | 0.325930149 | 0.553762043 |
| cg00275503 | 6  | 8.77E-16 | 0.167468747 | 0.39418424  |
| cg05823812 | 13 | 1.04E-10 | 0.30181089  | 0.526452372 |
| cg15278798 | 10 | 1.03E-09 | 0.375244157 | 0.599267243 |
| cg11291003 | 5  | 3.65E-11 | 0.185882375 | 0.409739719 |
| cg11682774 | 11 | 2.69E-08 | 0.46173932  | 0.68501264  |
| cg26403206 | 7  | 7.63E-11 | 0.46490242  | 0.686756108 |
| cg13609544 | 17 | 9.50E-09 | 0.485018642 | 0.706703582 |
| cg07455757 | 16 | 5.84E-13 | 0.367945427 | 0.589383442 |
| cg02388378 | 16 | 2.46E-12 | 0.434278157 | 0.654287762 |
| cg17242937 | 4  | 6.27E-14 | 0.162602857 | 0.38219144  |
| cg22488797 | 5  | 1.11E-15 | 0.301046371 | 0.519962973 |
| cg10818423 | 5  | 6.65E-19 | 0.179393526 | 0.398164348 |
| cg10482051 | 6  | 7.14E-12 | 0.439030527 | 0.657207246 |
| cg22192489 | 5  | 1.88E-10 | 0.179033022 | 0.397140932 |
| cg10111328 | 12 | 2.81E-14 | 0.315255409 | 0.533146872 |
| cg12482501 | 10 | 6.70E-08 | 0.425837536 | 0.643636928 |
| cg20783806 | 2  | 2.87E-08 | 0.423237937 | 0.64043854  |
| cg11375458 | 2  | 5.68E-12 | 0.200371656 | 0.416675703 |
| cg02112183 | 6  | 2.06E-10 | 0.496370948 | 0.709777003 |
| cg11124420 | 9  | 4.81E-16 | 0.192849878 | 0.405784854 |
| cg09088406 | 15 | 1.44E-15 | 0.251121129 | 0.464028528 |
| cg23143210 | 12 | 3.57E-14 | 0.553421923 | 0.766029106 |
| cg10396713 | 8  | 1.38E-10 | 0.288510844 | 0.501076982 |
| cg07825681 | 1  | 1.99E-12 | 0.525397356 | 0.737497878 |
| cg25034991 | 10 | 1.07E-12 | 0.247297848 | 0.458006798 |
| cg07271394 | 16 | 4.83E-16 | 0.223598064 | 0.433743254 |
| cg23471798 | 3  | 2.14E-11 | 0.250084507 | 0.459689958 |
| cg14336872 | 4  | 2.61E-13 | 0.520782763 | 0.730184439 |
| cg24601327 | 1  | 6.48E-13 | 0.224369362 | 0.433242368 |
| cg03722396 | 4  | 1.80E-11 | 0.10908689  | 0.317747166 |
| cg21146170 | 8  | 3.85E-08 | 0.418203862 | 0.626737149 |
| cg07584669 | 16 | 2.06E-11 | 0.319919641 | 0.526531564 |

|            |    |          |             |             |
|------------|----|----------|-------------|-------------|
| cg04903623 | 6  | 8.19E-06 | 0.386685747 | 0.593224126 |
| cg02931729 | 11 | 8.42E-09 | 0.358428428 | 0.564847225 |
| cg25843564 | 6  | 5.13E-10 | 0.448316252 | 0.654732085 |
| cg14016055 | 1  | 7.20E-13 | 0.489004909 | 0.695124946 |
| cg10664801 | 17 | 1.28E-12 | 0.226523276 | 0.432098076 |
| cg11671598 | 4  | 9.04E-14 | 0.323571941 | 0.528362    |
| cg20521863 | 12 | 6.28E-10 | 0.252214113 | 0.456838809 |
| cg21106719 | 3  | 1.98E-14 | 0.183099042 | 0.387675959 |
| cg01618806 | 2  | 7.30E-12 | 0.357678394 | 0.561920194 |
| cg04969428 | 6  | 1.32E-09 | 0.451622778 | 0.654362468 |
| cg18082362 | 3  | 7.27E-12 | 0.205270708 | 0.407919389 |
| cg25750507 | 17 | 7.45E-16 | 0.210411723 | 0.412469262 |
| cg12569835 | 2  | 5.09E-12 | 0.368907428 | 0.570266172 |
| cg08454455 | 16 | 1.08E-13 | 0.338867237 | 0.539764408 |
| cg15726055 | 1  | 1.01E-06 | 0.352547374 | 0.553279235 |
| cg11278107 | 4  | 3.21E-10 | 0.479851304 | 0.679729666 |
| cg22005990 | 17 | 1.08E-09 | 0.228941518 | 0.428694424 |
| cg24990283 | 8  | 7.77E-12 | 0.308034338 | 0.507782466 |
| cg07521394 | 16 | 1.81E-13 | 0.572215017 | 0.771542926 |
| cg10581012 | 11 | 1.21E-13 | 0.184162386 | 0.383149936 |
| cg13063207 | 8  | 2.62E-18 | 0.176240394 | 0.374831167 |
| cg00667841 | 4  | 4.71E-05 | 0.36410446  | 0.562232884 |
| cg01502116 | 4  | 1.82E-07 | 0.481063635 | 0.678914943 |
| cg11792671 | 2  | 4.90E-10 | 0.321060761 | 0.518282443 |
| cg12478032 | 5  | 3.27E-14 | 0.165412542 | 0.362403223 |
| cg22808086 | 10 | 1.61E-16 | 0.300807645 | 0.497659371 |
| cg05571619 | 6  | 3.96E-10 | 0.460710014 | 0.657142942 |
| cg08578568 | 16 | 4.98E-11 | 0.314891371 | 0.511193253 |
| cg26950756 | 15 | 1.24E-09 | 0.37677746  | 0.572988576 |
| cg11791052 | 4  | 1.94E-08 | 0.30855816  | 0.504672209 |
| cg10859449 | 14 | 1.09E-13 | 0.268186401 | 0.464265621 |
| cg12008054 | 13 | 1.80E-09 | 0.456925181 | 0.652840137 |
| cg21818470 | 2  | 2.83E-09 | 0.279887224 | 0.474996417 |
| cg17695537 | 2  | 5.05E-11 | 0.455016969 | 0.649499359 |
| cg15529155 | 10 | 7.45E-16 | 0.16423995  | 0.358364169 |
| cg09584358 | 17 | 6.54E-11 | 0.222848394 | 0.416250843 |
| cg17438211 | 5  | 9.39E-09 | 0.293674236 | 0.486330922 |
| cg15136913 | 10 | 2.58E-12 | 0.250779374 | 0.443398105 |
| cg12126859 | 8  | 4.23E-09 | 0.349528213 | 0.541791945 |
| cg00786237 | 3  | 5.06E-11 | 0.340084062 | 0.532110694 |
| cg05331334 | 18 | 4.94E-11 | 0.492772768 | 0.684763541 |
| cg20000602 | 12 | 2.36E-07 | 0.360641885 | 0.55220065  |
| cg12363903 | 5  | 5.83E-09 | 0.189542764 | 0.380781629 |
| cg10134799 | 6  | 4.73E-07 | 0.338431341 | 0.529455002 |
| cg09861977 | 4  | 1.18E-10 | 0.362468517 | 0.55297198  |
| cg05776053 | 2  | 4.53E-11 | 0.474186619 | 0.664313497 |

|            |    |            |             |             |
|------------|----|------------|-------------|-------------|
| cg04304687 | 5  | 7.04E-07   | 0.374887819 | 0.56497983  |
| cg25985031 | 15 | 6.76E-11   | 0.256778004 | 0.446463248 |
| cg22389275 | 4  | 4.90E-09   | 0.567668009 | 0.757314471 |
| cg14100362 | 5  | 1.62E-10   | 0.294464493 | 0.483717706 |
| cg19578030 | 18 | 5.62E-08   | 0.543181881 | 0.732212285 |
| cg18701093 | 12 | 2.22E-07   | 0.419864981 | 0.608152795 |
| cg18790559 | 8  | 3.42E-11   | 0.194406766 | 0.38172642  |
| cg18924771 | 5  | 6.82E-07   | 0.438189058 | 0.625499863 |
| cg23467659 | 2  | 2.16E-12   | 0.300503295 | 0.4877839   |
| cg06119162 | 21 | 4.05E-13   | 0.327115636 | 0.514366204 |
| cg03387289 | 8  | 3.87E-08   | 0.381029653 | 0.568044976 |
| cg18103859 | 14 | 0.00033915 | 0.400363548 | 0.587364769 |
| cg19429051 | 5  | 1.14E-08   | 0.405451613 | 0.592319215 |
| cg26236655 | 2  | 1.18E-07   | 0.390336718 | 0.576858284 |
| cg21156438 | 13 | 3.73E-05   | 0.535567058 | 0.721554987 |
| cg16742090 | 16 | 1.14E-07   | 0.559388809 | 0.745254255 |
| cg01721569 | 2  | 8.32E-12   | 0.41539811  | 0.600901324 |
| cg16652303 | 11 | 1.48E-08   | 0.325141432 | 0.510630494 |
| cg05667107 | 6  | 1.05E-13   | 0.210747737 | 0.396073558 |
| cg09868598 | 5  | 1.72E-13   | 0.104330931 | 0.289554726 |
| cg23949362 | 3  | 1.14E-13   | 0.540413306 | 0.725051283 |
| cg04729173 | 11 | 2.13E-13   | 0.357638354 | 0.542187702 |
| cg25255850 | 17 | 1.63E-08   | 0.229719133 | 0.414128758 |
| cg27047494 | 5  | 8.33E-15   | 0.287664972 | 0.471915815 |
| cg09621330 | 16 | 3.99E-10   | 0.555647046 | 0.739506171 |
| cg08182501 | 2  | 1.32E-05   | 0.480756432 | 0.664460483 |
| cg05793013 | 16 | 1.07E-09   | 0.483738373 | 0.666274391 |
| cg00921160 | 14 | 1.27E-09   | 0.591874023 | 0.774399569 |
| cg13777513 | 15 | 1.25E-07   | 0.486113491 | 0.668628801 |
| cg09626054 | 7  | 9.06E-14   | 0.194969359 | 0.377133311 |
| cg02292809 | 6  | 4.12E-10   | 0.2808921   | 0.462787166 |
| cg14613508 | 5  | 1.36E-07   | 0.362475342 | 0.544344804 |
| cg01706334 | 8  | 4.68E-09   | 0.62702925  | 0.807893088 |
| cg24491784 | 15 | 0.00025439 | 0.530398777 | 0.710917586 |
| cg11147251 | 8  | 4.65E-07   | 0.52488962  | 0.704765006 |
| cg23558626 | 2  | 1.86E-06   | 0.561175913 | 0.740963106 |
| cg09545984 | 4  | 1.34E-10   | 0.376753515 | 0.555861019 |
| cg03510186 | 7  | 6.63E-10   | 0.400393115 | 0.579487852 |
| cg08528417 | 7  | 1.63E-17   | 0.307749797 | 0.486406875 |
| cg01998856 | 11 | 7.76E-09   | 0.323091155 | 0.501424086 |
| cg23091549 | 1  | 7.19E-09   | 0.462935816 | 0.640677438 |
| cg27228712 | 7  | 2.07E-09   | 0.555000661 | 0.732703371 |
| cg11284842 | 5  | 1.60E-08   | 0.277880352 | 0.455327894 |
| cg07963316 | 6  | 1.55E-11   | 0.536073953 | 0.713426898 |
| cg18391978 | 14 | 1.65E-11   | 0.443213939 | 0.620212037 |
| cg13589810 | 11 | 6.00E-12   | 0.40695355  | 0.58350894  |

|            |    |            |             |             |
|------------|----|------------|-------------|-------------|
| cg16243532 | 3  | 1.03E-10   | 0.231963981 | 0.40831074  |
| cg13851508 | 2  | 4.18E-08   | 0.542027319 | 0.7183645   |
| cg17223170 | 5  | 6.67E-11   | 0.243171129 | 0.419294385 |
| cg11257689 | 10 | 2.50E-09   | 0.268806556 | 0.444703141 |
| cg11238518 | 2  | 1.65E-08   | 0.633727173 | 0.809405485 |
| cg15172981 | 2  | 8.91E-10   | 0.196821083 | 0.371959458 |
| cg27190654 | 4  | 5.08E-11   | 0.495330911 | 0.670353149 |
| cg00392505 | 10 | 1.30E-08   | 0.573855189 | 0.748538293 |
| cg12463256 | 10 | 8.95E-09   | 0.365747618 | 0.540375262 |
| cg12851161 | 13 | 2.49E-10   | 0.264157864 | 0.438309349 |
| cg16564132 | 7  | 3.18E-09   | 0.538685695 | 0.712724248 |
| cg08528604 | 13 | 2.66E-05   | 0.53816943  | 0.712103148 |
| cg22869567 | 12 | 2.65E-08   | 0.473730928 | 0.647286517 |
| cg10313384 | 12 | 3.44E-10   | 0.315092821 | 0.488116834 |
| cg13996610 | 4  | 4.85E-08   | 0.502300267 | 0.675125232 |
| cg25892587 | 10 | 1.66E-09   | 0.157780903 | 0.330581227 |
| cg22770294 | 4  | 4.00E-11   | 0.466758602 | 0.639550276 |
| cg13343392 | 15 | 3.55E-07   | 0.396869217 | 0.569640903 |
| cg06683458 | 17 | 6.85E-13   | 0.201869556 | 0.374316514 |
| cg11566520 | 5  | 9.40E-11   | 0.530594415 | 0.702487559 |
| cg26236177 | 14 | 0.00018331 | 0.260090154 | 0.431636571 |
| cg03762802 | 8  | 1.45E-05   | 0.522388973 | 0.693823616 |
| cg17405031 | 1  | 4.75E-10   | 0.258630907 | 0.429374046 |
| cg00267694 | 8  | 1.01E-11   | 0.221499266 | 0.391967395 |
| cg13430898 | 9  | 1.07E-11   | 0.571470017 | 0.741597047 |
| cg18408209 | 2  | 4.64E-08   | 0.379007772 | 0.548977814 |
| cg20706315 | 17 | 1.59E-11   | 0.199745387 | 0.369413876 |
| cg01950524 | 5  | 3.31E-05   | 0.446100455 | 0.615442034 |
| cg08890503 | 21 | 4.02E-05   | 0.447507431 | 0.616648717 |
| cg07617237 | 6  | 3.89E-09   | 0.212514153 | 0.379892145 |
| cg16933229 | 4  | 1.85E-09   | 0.225827717 | 0.392276507 |
| cg21805950 | 8  | 9.43E-07   | 0.420282634 | 0.58661883  |
| cg17273911 | 11 | 1.35E-08   | 0.26241139  | 0.428694051 |
| cg25877512 | 11 | 3.40E-08   | 0.350514691 | 0.516790563 |
| cg04526480 | 1  | 1.43E-11   | 0.180681962 | 0.346619925 |
| cg11248896 | 2  | 6.98E-09   | 0.24018074  | 0.405913769 |
| cg07684152 | 12 | 2.57E-06   | 0.416762553 | 0.582480953 |
| cg10519417 | 17 | 1.79E-06   | 0.409360672 | 0.575066935 |
| cg02201914 | 4  | 1.25E-07   | 0.217127674 | 0.382764512 |
| cg11762242 | 10 | 1.59E-09   | 0.53556451  | 0.70086515  |
| cg01223086 | 15 | 1.54E-05   | 0.335910775 | 0.501148179 |
| cg16622517 | 4  | 3.99E-10   | 0.466807325 | 0.631955377 |
| cg04956801 | 10 | 6.45E-06   | 0.595138913 | 0.760104788 |
| cg20419272 | 8  | 1.05E-08   | 0.266720131 | 0.431656978 |
| cg08023442 | 3  | 4.72E-06   | 0.436687187 | 0.601327125 |
| cg25467833 | 1  | 8.22E-11   | 0.124993304 | 0.289489278 |

|            |    |            |             |             |
|------------|----|------------|-------------|-------------|
| cg27391470 | 16 | 2.45E-06   | 0.420587308 | 0.585081369 |
| cg26308042 | 4  | 2.07E-10   | 0.453451768 | 0.617720487 |
| cg25500001 | 10 | 1.62E-08   | 0.221507529 | 0.385644792 |
| cg10582556 | 5  | 4.46E-09   | 0.469368314 | 0.63336607  |
| cg03875496 | 6  | 2.08E-06   | 0.266620705 | 0.430360013 |
| cg03462096 | 14 | 5.46E-05   | 0.441587579 | 0.605166082 |
| cg04435236 | 6  | 3.70E-14   | 0.290246965 | 0.453726208 |
| cg16041686 | 4  | 5.18E-14   | 0.122908445 | 0.286082981 |
| cg02482941 | 22 | 7.51E-09   | 0.65902465  | 0.822056225 |
| cg09574009 | 13 | 1.93E-10   | 0.472615867 | 0.635511065 |
| cg22928386 | 2  | 3.87E-05   | 0.377931785 | 0.540305557 |
| cg07505018 | 16 | 7.20E-10   | 0.424060744 | 0.585855718 |
| cg14990082 | 6  | 2.55E-05   | 0.435897096 | 0.597616817 |
| cg22041610 | 2  | 0.00011893 | 0.551430107 | 0.713112376 |
| cg12593176 | 1  | 2.61E-12   | 0.537669364 | 0.699036643 |
| cg04173816 | 5  | 3.41E-08   | 0.311120307 | 0.47239891  |
| cg14799457 | 18 | 2.96E-08   | 0.316498298 | 0.477504611 |
| cg05123646 | 4  | 2.59E-08   | 0.241967773 | 0.402875418 |
| cg24091104 | 7  | 3.66E-08   | 0.222351816 | 0.383159727 |
| cg03796943 | 2  | 6.12E-10   | 0.559993467 | 0.720735384 |
| cg03043711 | 13 | 2.53E-10   | 0.260392295 | 0.421054178 |
| cg13186470 | 15 | 2.20E-05   | 0.251660718 | 0.412289077 |
| cg10454879 | 8  | 1.69E-05   | 0.548584439 | 0.708967452 |
| cg11863406 | 13 | 1.51E-10   | 0.370918809 | 0.531271818 |
| cg00892419 | 13 | 9.53E-05   | 0.494474578 | 0.654624682 |
| cg06879222 | 16 | 1.82E-10   | 0.265183838 | 0.425213474 |
| cg01684721 | 14 | 3.47E-13   | 0.120995683 | 0.281005657 |
| cg20193839 | 8  | 1.27E-05   | 0.472039406 | 0.631949554 |
| cg04131890 | 5  | 3.72E-13   | 0.451204534 | 0.611000031 |
| cg04174726 | 5  | 1.82E-09   | 0.661714575 | 0.821389458 |
| cg22115076 | 5  | 9.91E-17   | 0.09022903  | 0.249631034 |
| cg01638741 | 16 | 8.01E-07   | 0.598899067 | 0.758262034 |
| cg08488615 | 16 | 1.57E-06   | 0.358984959 | 0.518315491 |
| cg05239940 | 10 | 7.47E-07   | 0.439565498 | 0.598376625 |
| cg08490192 | 3  | 1.21E-11   | 0.403006418 | 0.561800967 |
| cg10176070 | 16 | 5.97E-11   | 0.685769509 | 0.84440425  |
| cg23184653 | 3  | 4.16E-06   | 0.308068179 | 0.466349177 |
| cg24048361 | 1  | 2.05E-06   | 0.576382903 | 0.73449778  |
| cg27028202 | 6  | 9.91E-08   | 0.255283136 | 0.413394589 |
| cg13159361 | 15 | 3.17E-12   | 0.227488424 | 0.385551107 |
| cg06993307 | 16 | 2.74E-10   | 0.179059044 | 0.337035129 |
| cg26310273 | 3  | 9.07E-12   | 0.512704987 | 0.670601512 |
| cg26419676 | 1  | 4.28E-06   | 0.465361042 | 0.623239451 |
| cg19725625 | 3  | 0.00020235 | 0.30827508  | 0.465936281 |
| cg18031861 | 13 | 3.68E-06   | 0.556960712 | 0.714442701 |
| cg08217163 | 2  | 1.63E-07   | 0.466981621 | 0.624244414 |



|            |    |            |             |             |
|------------|----|------------|-------------|-------------|
| cg27518631 | 16 | 4.57E-13   | 0.415227964 | 0.572470562 |
| cg19610529 | 14 | 5.23E-05   | 0.50154479  | 0.658752791 |
| cg11702351 | 11 | 3.37E-06   | 0.41389286  | 0.571053272 |
| cg16133703 | 5  | 5.77E-10   | 0.534876905 | 0.692020889 |
| cg05494668 | 11 | 4.15E-06   | 0.418885102 | 0.575872146 |
| cg00923890 | 13 | 2.40E-07   | 0.596247441 | 0.753082334 |
| cg27368068 | 3  | 5.42E-12   | 0.632319366 | 0.789131913 |
| cg04184019 | 4  | 1.66E-10   | 0.14393775  | 0.30063607  |
| cg01378062 | 3  | 5.07E-07   | 0.367669955 | 0.524329413 |
| cg23495453 | 5  | 1.32E-06   | 0.40188212  | 0.558503706 |
| cg04121415 | 3  | 2.57E-10   | 0.305659591 | 0.461559732 |
| cg02377941 | 16 | 2.79E-08   | 0.644420219 | 0.800051829 |
| cg18109389 | 11 | 3.41E-07   | 0.417234098 | 0.572777369 |
| cg16721489 | 2  | 6.81E-06   | 0.373214051 | 0.528652305 |
| cg05306029 | 2  | 2.64E-06   | 0.455707555 | 0.611063292 |
| cg18683103 | 10 | 4.57E-09   | 0.353144479 | 0.508344728 |
| cg20934191 | 6  | 2.17E-06   | 0.340443487 | 0.495533844 |
| cg12283119 | 2  | 3.62E-10   | 0.238007483 | 0.392976143 |
| cg06489728 | 10 | 4.06E-08   | 0.634714194 | 0.789651368 |
| cg05057794 | 10 | 7.37E-11   | 0.347897147 | 0.502795631 |
| cg24335051 | 2  | 3.70E-13   | 0.600988616 | 0.755820498 |
| cg23280506 | 17 | 1.48E-10   | 0.217313885 | 0.371989429 |
| cg26654559 | 16 | 1.55E-10   | 0.2970482   | 0.45159516  |
| cg18516557 | 2  | 6.41E-05   | 0.407390622 | 0.56190755  |
| cg07264203 | 3  | 0.00086189 | 0.559653611 | 0.714086278 |
| cg08798307 | 7  | 2.46E-10   | 0.35448228  | 0.508578149 |
| cg08704302 | 15 | 8.43E-13   | 0.180978901 | 0.334982767 |
| cg11304968 | 21 | 1.75E-07   | 0.373806934 | 0.527714963 |
| cg20821800 | 13 | 8.58E-07   | 0.397536557 | 0.551234492 |
| cg17832917 | 13 | 1.91E-08   | 0.652438111 | 0.805963573 |
| cg14658149 | 20 | 3.04E-12   | 0.397949056 | 0.551471222 |
| cg00951108 | 1  | 9.92E-05   | 0.39269596  | 0.546178672 |
| cg15035716 | 1  | 4.77E-06   | 0.708810177 | 0.862271486 |
| cg10441909 | 12 | 1.95E-12   | 0.133486942 | 0.286839889 |
| cg01427471 | 11 | 1.64E-16   | 0.22476084  | 0.378027109 |
| cg08423879 | 12 | 3.69E-08   | 0.329840147 | 0.482999298 |
| cg24377437 | 6  | 2.71E-07   | 0.539119414 | 0.692089957 |
| cg22911013 | 3  | 3.52E-05   | 0.426583271 | 0.57942955  |
| cg05091736 | 17 | 4.23E-09   | 0.574372049 | 0.727170324 |
| cg02355680 | 13 | 4.02E-08   | 0.395645198 | 0.548359758 |
| cg07482296 | 2  | 2.59E-06   | 0.634049593 | 0.786580462 |
| cg26535834 | 2  | 3.01E-07   | 0.231128573 | 0.383480676 |
| cg07990582 | 10 | 1.88E-10   | 0.589093227 | 0.741396151 |
| cg00248242 | 2  | 1.46E-12   | 0.155400307 | 0.307638702 |
| cg27581660 | 4  | 3.59E-09   | 0.216818661 | 0.368880153 |
| cg27428708 | 16 | 1.11E-08   | 0.521837986 | 0.673885126 |

|            |    |            |             |             |
|------------|----|------------|-------------|-------------|
| cg20082877 | 18 | 1.28E-05   | 0.320712556 | 0.472527481 |
| cg09600715 | 7  | 5.07E-05   | 0.578956712 | 0.73073268  |
| cg11857320 | 4  | 1.37E-07   | 0.290708816 | 0.442350697 |
| cg10643493 | 8  | 2.44E-08   | 0.419498332 | 0.571055612 |
| cg02220233 | 4  | 3.20E-07   | 0.459692319 | 0.611201364 |
| cg26623696 | 11 | 1.53E-05   | 0.454141889 | 0.605640569 |
| cg23506042 | 5  | 8.09E-11   | 0.132829217 | 0.283929205 |
| cg21221540 | 3  | 7.03E-06   | 0.319552275 | 0.470614995 |
| cg13600257 | 6  | 1.55E-10   | 0.46124231  | 0.612178093 |
| cg04806150 | 13 | 7.81E-10   | 0.432914758 | 0.583847443 |
| cg25368116 | 11 | 3.52E-08   | 0.328179127 | 0.479067951 |
| cg15142335 | 1  | 2.44E-05   | 0.518021501 | 0.668817587 |
| cg04781339 | 21 | 9.24E-07   | 0.276394668 | 0.427112642 |
| cg09088153 | 15 | 0.00019264 | 0.588192572 | 0.738858712 |
| cg25339054 | 5  | 1.01E-11   | 0.112027553 | 0.26215429  |
| cg06227594 | 11 | 1.45E-07   | 0.587068373 | 0.736755122 |
| cg01939535 | 5  | 7.78E-06   | 0.23870279  | 0.387880643 |
| cg07254667 | 10 | 5.30E-10   | 0.513948129 | 0.663024805 |
| cg27349540 | 17 | 1.49E-07   | 0.241126195 | 0.390149833 |
| cg00411072 | 17 | 4.23E-07   | 0.700485913 | 0.849401134 |
| cg06688733 | 5  | 2.83E-06   | 0.3502448   | 0.499100091 |
| cg06801941 | 5  | 2.31E-10   | 0.620134135 | 0.768891621 |
| cg25941985 | 4  | 2.06E-10   | 0.515217564 | 0.663856876 |
| cg11855682 | 5  | 3.93E-11   | 0.223253587 | 0.371891733 |
| cg18817396 | 13 | 9.55E-08   | 0.262250587 | 0.410406775 |
| cg22980453 | 12 | 6.22E-10   | 0.637192962 | 0.785303836 |
| cg02192281 | 13 | 1.08E-06   | 0.513185952 | 0.661068536 |
| cg10195894 | 13 | 9.16E-07   | 0.580747995 | 0.728578399 |
| cg07486821 | 16 | 1.17E-06   | 0.373141587 | 0.520845316 |
| cg02642958 | 8  | 1.87E-05   | 0.274410244 | 0.421791121 |
| cg09337429 | 14 | 4.08E-06   | 0.454097678 | 0.600890578 |
| cg08202972 | 16 | 1.32E-10   | 0.624142863 | 0.770834494 |
| cg09317508 | 1  | 1.44E-06   | 0.401903592 | 0.548592349 |
| cg16726869 | 4  | 1.38E-08   | 0.363554899 | 0.510165823 |
| cg09741519 | 17 | 3.45E-08   | 0.281070263 | 0.427579334 |
| cg00435752 | 15 | 9.56E-07   | 0.236263715 | 0.382762036 |
| cg25745945 | 13 | 9.21E-09   | 0.182953925 | 0.329235285 |
| cg00518857 | 13 | 1.36E-07   | 0.321890586 | 0.468043694 |
| cg03133735 | 4  | 3.63E-06   | 0.238903222 | 0.384836228 |
| cg07992457 | 17 | 2.04E-08   | 0.263026397 | 0.408939565 |
| cg18130688 | 3  | 1.45E-06   | 0.248876662 | 0.394752602 |
| cg14911766 | 6  | 1.81E-12   | 0.175548739 | 0.32134837  |
| cg14115325 | 10 | 1.80E-09   | 0.5779637   | 0.723663811 |
| cg14209781 | 4  | 3.30E-10   | 0.256225008 | 0.401706002 |
| cg22163631 | 20 | 3.92E-08   | 0.229584435 | 0.375051696 |
| cg07184658 | 9  | 7.14E-06   | 0.278592887 | 0.423752847 |

|            |    |            |             |             |
|------------|----|------------|-------------|-------------|
| cg25649784 | 8  | 1.12E-05   | 0.550101272 | 0.6949888   |
| cg04340928 | 16 | 9.67E-10   | 0.45607306  | 0.6009564   |
| cg04640920 | 15 | 2.19E-07   | 0.619551083 | 0.76429583  |
| cg26215982 | 12 | 8.45E-12   | 0.406581657 | 0.551326252 |
| cg27443662 | 6  | 3.68E-11   | 0.635479562 | 0.78007548  |
| cg10168726 | 5  | 8.49E-05   | 0.357510433 | 0.50205385  |
| cg23041447 | 13 | 1.73E-05   | 0.399110384 | 0.543549466 |
| cg20662737 | 5  | 8.68E-11   | 0.511098936 | 0.655486693 |
| cg24604172 | 6  | 7.86E-09   | 0.359732817 | 0.504108356 |
| cg11675165 | 8  | 7.08E-09   | 0.420995345 | 0.565312782 |
| cg10233830 | 12 | 1.08E-07   | 0.158324519 | 0.302629711 |
| cg14384416 | 2  | 3.98E-11   | 0.63681849  | 0.780992215 |
| cg24447788 | 19 | 9.64E-08   | 0.406450039 | 0.550569859 |
| cg04166294 | 16 | 4.13E-10   | 0.212278389 | 0.356390345 |
| cg11537447 | 7  | 1.34E-09   | 0.635361972 | 0.779425876 |
| cg16385533 | 22 | 3.12E-06   | 0.487013787 | 0.631034669 |
| cg22757977 | 19 | 0.00011958 | 0.506466387 | 0.650481013 |
| cg11361201 | 5  | 8.31E-14   | 0.151629559 | 0.295440003 |
| cg21186098 | 8  | 1.32E-05   | 0.252639052 | 0.396445229 |
| cg21202759 | 2  | 0.00254134 | 0.449219212 | 0.593000479 |
| cg15998518 | 2  | 8.22E-09   | 0.438837499 | 0.582587626 |
| cg24530432 | 4  | 1.11E-07   | 0.409039283 | 0.552783776 |
| cg03647549 | 4  | 1.75E-06   | 0.600617277 | 0.744286497 |
| cg03832015 | 16 | 1.78E-12   | 0.227529521 | 0.371167355 |
| cg07336350 | 16 | 2.28E-10   | 0.22948115  | 0.372417401 |
| cg08804742 | 3  | 4.88E-13   | 0.636595151 | 0.779342917 |
| cg17712241 | 6  | 5.34E-06   | 0.25874179  | 0.401390172 |
| cg03086399 | 10 | 1.45E-09   | 0.536704157 | 0.679325803 |
| cg03886436 | 3  | 8.88E-07   | 0.290900624 | 0.433339904 |
| cg15688980 | 3  | 7.58E-06   | 0.567459062 | 0.709798004 |
| cg23428387 | 22 | 3.05E-07   | 0.557542522 | 0.699639749 |
| cg01719994 | 1  | 8.45E-09   | 0.38429383  | 0.526286936 |
| cg00734931 | 6  | 1.78E-11   | 0.260985443 | 0.402922535 |
| cg06618450 | 4  | 2.06E-07   | 0.487278006 | 0.628804813 |
| cg17023122 | 1  | 0.00079341 | 0.549748805 | 0.691132711 |
| cg27259235 | 6  | 1.65E-07   | 0.272878781 | 0.414227539 |
| cg12341018 | 6  | 3.11E-06   | 0.279352001 | 0.420673957 |
| cg20480070 | 10 | 1.98E-06   | 0.691742715 | 0.833057638 |
| cg08176551 | 16 | 6.70E-10   | 0.641085716 | 0.782349915 |
| cg17905462 | 10 | 1.13E-06   | 0.232132861 | 0.373363892 |
| cg07422940 | 16 | 1.57E-10   | 0.555032663 | 0.696188145 |
| cg04146228 | 8  | 7.55E-05   | 0.535993404 | 0.677020675 |
| cg19041857 | 6  | 9.95E-07   | 0.479342088 | 0.620356688 |
| cg07790170 | 4  | 2.95E-08   | 0.089954267 | 0.23077467  |
| cg11927345 | 5  | 1.83E-05   | 0.329353447 | 0.470173693 |
| cg13098071 | 1  | 6.99E-11   | 0.452092749 | 0.592764941 |

|            |    |            |             |             |
|------------|----|------------|-------------|-------------|
| cg00525392 | 18 | 1.32E-07   | 0.291730065 | 0.432379873 |
| cg19642431 | 12 | 6.21E-10   | 0.439169425 | 0.579717959 |
| cg01822827 | 8  | 3.99E-08   | 0.529024691 | 0.669557983 |
| cg24590395 | 1  | 2.90E-08   | 0.383027601 | 0.523466812 |
| cg19601666 | 1  | 3.35E-06   | 0.214783589 | 0.355213664 |
| cg09050058 | 5  | 2.09E-05   | 0.402650747 | 0.542905221 |
| cg01070903 | 17 | 2.59E-15   | 0.295733077 | 0.435934711 |
| cg17534999 | 11 | 3.42E-05   | 0.398207977 | 0.538322328 |
| cg18837542 | 4  | 1.37E-07   | 0.510551948 | 0.650562212 |
| cg13183298 | 1  | 2.39E-10   | 0.459148664 | 0.599005371 |
| cg04781095 | 2  | 2.64E-05   | 0.528744483 | 0.668542778 |
| cg25576818 | 7  | 7.05E-05   | 0.426162726 | 0.5658701   |
| cg24095850 | 17 | 1.26E-14   | 0.567817109 | 0.707463852 |
| cg14234083 | 17 | 2.27E-14   | 0.386197838 | 0.525770532 |
| cg09820180 | 6  | 8.55E-09   | 0.421219704 | 0.560763179 |
| cg08817353 | 2  | 8.49E-08   | 0.25924386  | 0.398713659 |
| cg01747796 | 1  | 0.00014344 | 0.559168584 | 0.698576193 |
| cg08117745 | 20 | 2.56E-06   | 0.636780033 | 0.775951931 |
| cg15562758 | 2  | 7.12E-08   | 0.479908919 | 0.619077057 |
| cg10413688 | 2  | 1.38E-10   | 0.500990533 | 0.64000171  |
| cg14796655 | 7  | 5.42E-07   | 0.519218423 | 0.65793379  |
| cg19913199 | 8  | 5.70E-11   | 0.587026953 | 0.725687508 |
| cg20199770 | 2  | 5.89E-14   | 0.413674532 | 0.552289056 |
| cg16787307 | 10 | 5.26E-11   | 0.139901817 | 0.278390908 |
| cg27146356 | 16 | 0.00022498 | 0.355288177 | 0.493451911 |
| cg19891440 | 15 | 0.00112576 | 0.629019677 | 0.767135417 |
| cg02551095 | 15 | 5.54E-12   | 0.617798494 | 0.755880129 |
| cg02896757 | 8  | 0.00017411 | 0.486354804 | 0.624430558 |
| cg24018633 | 14 | 2.39E-07   | 0.170473668 | 0.308535708 |
| cg13441112 | 1  | 6.22E-09   | 0.476619923 | 0.614549043 |
| cg11235411 | 10 | 7.53E-05   | 0.275346627 | 0.413200006 |
| cg11496014 | 10 | 9.95E-06   | 0.461323922 | 0.599176221 |
| cg07997877 | 17 | 6.13E-10   | 0.265878916 | 0.40348161  |
| cg25913457 | 13 | 5.08E-11   | 0.309121624 | 0.446536718 |
| cg19848924 | 10 | 2.33E-10   | 0.666806335 | 0.80412873  |
| cg10855427 | 2  | 7.25E-05   | 0.196452947 | 0.333712676 |
| cg05605980 | 7  | 8.56E-05   | 0.358746961 | 0.495453508 |
| cg16652387 | 4  | 0.00070883 | 0.522185584 | 0.658881022 |
| cg10225408 | 8  | 5.94E-07   | 0.566727314 | 0.703367862 |
| cg04658679 | 12 | 0.00032423 | 0.247616863 | 0.384166551 |
| cg21653474 | 6  | 4.74E-08   | 0.283579266 | 0.420059673 |
| cg20377232 | 6  | 5.48E-07   | 0.519954301 | 0.656416778 |
| cg05529123 | 2  | 4.60E-08   | 0.353808779 | 0.490249805 |
| cg06910465 | 12 | 2.82E-09   | 0.70229192  | 0.838526591 |
| cg27302373 | 1  | 1.80E-08   | 0.579308589 | 0.715537259 |
| cg20023647 | 12 | 4.25E-10   | 0.604812237 | 0.74098095  |

|            |    |            |             |             |
|------------|----|------------|-------------|-------------|
| cg21255880 | 6  | 6.54E-06   | 0.293652928 | 0.429688341 |
| cg01071185 | 1  | 8.05E-08   | 0.183042155 | 0.318998998 |
| cg17651164 | 2  | 5.22E-13   | 0.466353964 | 0.602310445 |
| cg03852847 | 2  | 1.10E-10   | 0.308541183 | 0.444494589 |
| cg02194243 | 16 | 2.48E-11   | 0.149922777 | 0.285874507 |
| cg02320543 | 14 | 4.91E-06   | 0.214485756 | 0.350270067 |
| cg06614221 | 15 | 1.79E-06   | 0.362827004 | 0.498596953 |
| cg01428231 | 12 | 4.74E-08   | 0.534736952 | 0.670462581 |
| cg08866497 | 5  | 0.0001707  | 0.518798983 | 0.654320986 |
| cg00104608 | 3  | 9.19E-05   | 0.567491845 | 0.703008745 |
| cg04058281 | 5  | 2.41E-08   | 0.519388999 | 0.654804944 |
| cg25104233 | 2  | 6.20E-08   | 0.197168809 | 0.332498351 |
| cg21498326 | 21 | 0.00067053 | 0.525006827 | 0.660199424 |
| cg06609094 | 4  | 4.13E-08   | 0.188186552 | 0.323293807 |
| cg09619624 | 22 | 1.17E-11   | 0.107056023 | 0.242133342 |
| cg24838839 | 5  | 0.00011175 | 0.552046703 | 0.68698923  |
| cg03491895 | 2  | 3.12E-07   | 0.229404113 | 0.364184946 |
| cg08082810 | 14 | 0.00471644 | 0.563470667 | 0.698209137 |
| cg11650763 | 5  | 4.24E-06   | 0.264876588 | 0.39956736  |
| cg01030404 | 16 | 5.71E-05   | 0.277056112 | 0.411731863 |
| cg22567585 | 15 | 1.16E-09   | 0.202767905 | 0.337313805 |
| cg23111300 | 5  | 1.02E-06   | 0.457081307 | 0.591496847 |
| cg00033666 | 15 | 0.00260229 | 0.60179154  | 0.736058215 |
| cg17763192 | 16 | 3.14E-06   | 0.236743986 | 0.370975667 |
| cg15199622 | 11 | 9.04E-08   | 0.183518843 | 0.317720391 |
| cg14253670 | 8  | 1.23E-09   | 0.184730744 | 0.318924948 |
| cg12659158 | 15 | 1.79E-06   | 0.527580177 | 0.661712759 |
| cg10208777 | 8  | 1.25E-05   | 0.354890031 | 0.489022128 |
| cg03467728 | 1  | 6.13E-08   | 0.579197333 | 0.713265871 |
| cg06615699 | 13 | 6.97E-09   | 0.451347954 | 0.585302877 |
| cg11356552 | 12 | 1.91E-08   | 0.299346873 | 0.433206188 |
| cg27589654 | 16 | 4.61E-11   | 0.282175891 | 0.415959689 |
| cg00083042 | 10 | 2.44E-06   | 0.17236874  | 0.306085962 |
| cg11805647 | 15 | 2.94E-06   | 0.486179001 | 0.619692165 |
| cg05570141 | 8  | 0.00010727 | 0.328821498 | 0.46207018  |
| cg15037541 | 5  | 2.51E-05   | 0.470317812 | 0.603563615 |
| cg09889228 | 16 | 0.00012313 | 0.398980682 | 0.53219845  |
| cg01266853 | 6  | 7.41E-05   | 0.450729684 | 0.583667991 |
| cg26452224 | 19 | 3.03E-06   | 0.322971167 | 0.455824432 |
| cg07152755 | 2  | 4.86E-06   | 0.27442967  | 0.407101368 |
| cg23322933 | 14 | 4.23E-06   | 0.415408477 | 0.548022344 |
| cg19674722 | 2  | 1.12E-07   | 0.259252908 | 0.391787803 |
| cg08542715 | 17 | 6.60E-10   | 0.211654239 | 0.34388175  |
| cg09718582 | 2  | 1.18E-08   | 0.540449703 | 0.672660595 |
| cg12524725 | 2  | 2.09E-07   | 0.30967667  | 0.441848396 |
| cg02755847 | 6  | 1.96E-08   | 0.307906885 | 0.440017355 |

|            |    |            |             |             |
|------------|----|------------|-------------|-------------|
| cg15209029 | 1  | 5.62E-06   | 0.312168855 | 0.444175877 |
| cg03642555 | 5  | 4.00E-11   | 0.253646579 | 0.385534474 |
| cg22951342 | 6  | 5.71E-07   | 0.313825026 | 0.445700615 |
| cg15048461 | 12 | 4.25E-11   | 0.645702027 | 0.777547919 |
| cg24632480 | 10 | 4.98E-07   | 0.254711711 | 0.386535744 |
| cg03609088 | 18 | 4.00E-06   | 0.305300604 | 0.436982655 |
| cg13083035 | 12 | 5.88E-07   | 0.386371434 | 0.517791471 |
| cg08529345 | 16 | 1.10E-09   | 0.263826501 | 0.3950864   |
| cg01484716 | 6  | 7.53E-06   | 0.292655611 | 0.423761657 |
| cg08017409 | 16 | 5.18E-11   | 0.393907125 | 0.524805953 |
| cg23742233 | 15 | 4.52E-07   | 0.446703277 | 0.577491216 |
| cg21741708 | 8  | 1.43E-09   | 0.280048864 | 0.410772841 |
| cg20131581 | 8  | 9.95E-08   | 0.560416451 | 0.691073969 |
| cg27350073 | 3  | 0.00011206 | 0.454295909 | 0.584883966 |
| cg18939596 | 14 | 1.98E-07   | 0.301381016 | 0.431961154 |
| cg25203310 | 8  | 0.01587022 | 0.415891287 | 0.546408464 |
| cg19634252 | 4  | 5.15E-09   | 0.301331023 | 0.431763022 |
| cg06120979 | 10 | 2.30E-10   | 0.673516614 | 0.803779939 |
| cg01028017 | 6  | 1.47E-08   | 0.273155676 | 0.403400984 |
| cg19506686 | 2  | 2.18E-05   | 0.502217158 | 0.632382646 |
| cg04239548 | 1  | 3.86E-06   | 0.590155173 | 0.720145259 |
| cg13428681 | 1  | 1.90E-10   | 0.569733722 | 0.699539696 |
| cg05299459 | 2  | 3.09E-06   | 0.586235317 | 0.715990981 |
| cg03871120 | 18 | 0.00011391 | 0.408734158 | 0.538470846 |
| cg25456068 | 17 | 1.42E-09   | 0.31565677  | 0.445330996 |
| cg00745046 | 10 | 0.00058209 | 0.611332727 | 0.740909475 |
| cg01457778 | 2  | 0.00010211 | 0.310641233 | 0.440210315 |
| cg17291136 | 8  | 4.91E-11   | 0.205995109 | 0.335377767 |
| cg02805612 | 3  | 7.41E-07   | 0.361452731 | 0.490557491 |
| cg13446584 | 7  | 2.18E-07   | 0.118084744 | 0.247159884 |
| cg14775958 | 6  | 1.01E-10   | 0.492820031 | 0.62187686  |
| cg05575375 | 4  | 4.36E-15   | 0.274006312 | 0.403059522 |
| cg13674369 | 5  | 4.71E-10   | 0.585010868 | 0.714045134 |
| cg24518609 | 18 | 5.65E-06   | 0.345488069 | 0.474521391 |
| cg14584815 | 19 | 1.40E-12   | 0.238370942 | 0.367298039 |
| cg04208996 | 8  | 7.95E-05   | 0.586602423 | 0.715440521 |
| cg07920365 | 2  | 0.00065185 | 0.573074034 | 0.701806722 |
| cg05973305 | 5  | 3.43E-08   | 0.308118973 | 0.436822071 |
| cg18716635 | 8  | 6.07E-05   | 0.52196554  | 0.650599753 |
| cg26295786 | 14 | 1.06E-05   | 0.492449318 | 0.621075119 |
| cg08732659 | 16 | 6.42E-11   | 0.49046354  | 0.619047237 |
| cg08313393 | 2  | 1.27E-07   | 0.28554167  | 0.414022227 |
| cg03032497 | 14 | 0.0023129  | 0.376260473 | 0.504693298 |
| cg01736164 | 14 | 0.00012275 | 0.418056045 | 0.546421619 |
| cg05214511 | 4  | 5.20E-06   | 0.427318659 | 0.555650741 |
| cg10055580 | 17 | 6.54E-06   | 0.236621091 | 0.364745509 |

|            |    |            |             |             |
|------------|----|------------|-------------|-------------|
| cg02735058 | 6  | 1.98E-07   | 0.452455836 | 0.580527972 |
| cg10850823 | 5  | 0.00017525 | 0.404334283 | 0.532277972 |
| cg22356814 | 1  | 3.99E-10   | 0.187754363 | 0.31556809  |
| cg00998372 | 2  | 5.04E-06   | 0.233532497 | 0.361338907 |
| cg19765196 | 3  | 0.0018701  | 0.505890562 | 0.633581712 |
| cg24911283 | 4  | 1.84E-05   | 0.541569362 | 0.669246466 |
| cg23332501 | 13 | 8.00E-05   | 0.298501641 | 0.426091303 |
| cg25806932 | 2  | 3.33E-05   | 0.328075862 | 0.455535217 |
| cg03835233 | 6  | 7.29E-06   | 0.682359845 | 0.809808218 |
| cg19460909 | 13 | 1.10E-09   | 0.56595847  | 0.693252089 |
| cg25026248 | 10 | 3.99E-10   | 0.489951921 | 0.61720361  |
| cg07904568 | 7  | 6.71E-07   | 0.520896298 | 0.648022314 |
| cg18431486 | 11 | 1.90E-07   | 0.667516365 | 0.794628551 |
| cg03581311 | 4  | 1.65E-06   | 0.563366732 | 0.690435371 |
| cg12120205 | 3  | 9.90E-06   | 0.56468533  | 0.691725392 |
| cg27106204 | 7  | 0.00251384 | 0.534202909 | 0.661025635 |
| cg24556754 | 1  | 0.00133365 | 0.449051981 | 0.575793878 |
| cg13270626 | 13 | 2.33E-09   | 0.483298481 | 0.610005509 |
| cg00814898 | 6  | 5.11E-10   | 0.466322894 | 0.592898814 |
| cg02223135 | 3  | 0.00081452 | 0.287370969 | 0.413861986 |
| cg18120446 | 4  | 0.00176091 | 0.475479491 | 0.601880908 |
| cg03426023 | 16 | 1.29E-15   | 0.126735462 | 0.252959439 |
| cg06850158 | 4  | 0.00043507 | 0.512992341 | 0.6391819   |
| cg27547132 | 16 | 1.82E-06   | 0.204077872 | 0.330078239 |
| cg26426334 | 1  | 2.41E-06   | 0.278990724 | 0.404981324 |
| cg20056949 | 4  | 4.90E-05   | 0.484464517 | 0.610452656 |
| cg21054080 | 4  | 3.27E-06   | 0.346912332 | 0.472863321 |
| cg25805837 | 10 | 4.82E-05   | 0.69484197  | 0.820722892 |
| cg24232510 | 2  | 0.00204494 | 0.481062866 | 0.606877309 |
| cg07981003 | 1  | 8.48E-07   | 0.513132776 | 0.638816677 |
| cg17475269 | 7  | 5.05E-06   | 0.332125787 | 0.457795778 |
| cg12591622 | 6  | 4.47E-08   | 0.5003864   | 0.625962392 |
| cg06788355 | 4  | 1.76E-06   | 0.547017821 | 0.67257391  |
| cg03078141 | 4  | 4.88E-09   | 0.527155054 | 0.652657583 |
| cg00117237 | 8  | 0.00036938 | 0.382408142 | 0.507883724 |
| cg23157360 | 2  | 1.07E-06   | 0.214674974 | 0.340014262 |
| cg26251208 | 15 | 2.56E-06   | 0.49333627  | 0.618645209 |
| cg15087376 | 3  | 1.34E-07   | 0.115228048 | 0.24046932  |
| cg00434535 | 7  | 0.00093776 | 0.304294287 | 0.429491001 |
| cg22915373 | 13 | 7.62E-10   | 0.271385654 | 0.396543826 |
| cg17123334 | 4  | 0.00017159 | 0.584197858 | 0.709308298 |
| cg01220192 | 11 | 5.54E-11   | 0.736864955 | 0.861850078 |
| cg14338513 | 9  | 1.15E-06   | 0.127915338 | 0.252821324 |
| cg24393844 | 12 | 1.77E-06   | 0.349977826 | 0.47471969  |
| cg02744632 | 2  | 1.12E-05   | 0.16227214  | 0.286928311 |
| cg05019479 | 4  | 0.00017685 | 0.543285669 | 0.667709553 |

|            |    |            |             |             |
|------------|----|------------|-------------|-------------|
| cg06726893 | 16 | 2.95E-06   | 0.357600574 | 0.482011409 |
| cg06740372 | 3  | 2.48E-06   | 0.543088497 | 0.667413248 |
| cg27085488 | 5  | 2.98E-06   | 0.252400666 | 0.376456103 |
| cg06833347 | 2  | 1.97E-05   | 0.712982263 | 0.836985006 |
| cg09435411 | 16 | 9.48E-07   | 0.400840228 | 0.524825234 |
| cg13620608 | 10 | 3.02E-07   | 0.245822966 | 0.369758991 |
| cg06895675 | 10 | 2.18E-06   | 0.471669147 | 0.595574361 |
| cg18918418 | 2  | 0.00013862 | 0.505328465 | 0.629167995 |
| cg19094333 | 7  | 0.00066009 | 0.594461772 | 0.718237476 |
| cg15555095 | 13 | 0.00026543 | 0.381695084 | 0.505402091 |
| cg01447174 | 11 | 8.74E-06   | 0.40663293  | 0.530331242 |
| cg11759749 | 6  | 1.32E-05   | 0.263692241 | 0.387324448 |
| cg20806725 | 13 | 2.51E-05   | 0.484394077 | 0.607944434 |
| cg21444500 | 3  | 0.00094657 | 0.285037853 | 0.408486912 |
| cg26587870 | 6  | 1.15E-07   | 0.35139515  | 0.474841844 |
| cg24017800 | 17 | 1.07E-07   | 0.475749916 | 0.599194715 |
| cg04062622 | 11 | 0.0001588  | 0.322962534 | 0.446366977 |
| cg05492170 | 4  | 3.91E-09   | 0.14951543  | 0.272887431 |
| cg01733176 | 4  | 6.48E-09   | 0.121482887 | 0.244737079 |
| cg19627549 | 13 | 8.74E-06   | 0.402793614 | 0.526023376 |
| cg25764623 | 1  | 2.26E-11   | 0.20468271  | 0.327726994 |
| cg13954161 | 8  | 0.0070886  | 0.657906412 | 0.780888033 |
| cg24549912 | 5  | 7.06E-06   | 0.242932756 | 0.365826284 |
| cg01792876 | 8  | 0.00026962 | 0.172867829 | 0.295681865 |
| cg03330558 | 15 | 6.12E-07   | 0.242676925 | 0.365375906 |
| cg10585420 | 1  | 6.15E-05   | 0.365710603 | 0.488388856 |
| cg23186787 | 4  | 0.00020262 | 0.347988155 | 0.470665976 |
| cg26499663 | 8  | 4.37E-07   | 0.203484586 | 0.326114528 |
| cg09039890 | 6  | 3.13E-06   | 0.525469718 | 0.648070163 |
| cg23047671 | 5  | 1.21E-07   | 0.308983503 | 0.431429735 |
| cg03348100 | 3  | 2.22E-09   | 0.170887714 | 0.293293074 |
| cg25673593 | 17 | 5.17E-06   | 0.260216075 | 0.382597958 |
| cg21404045 | 7  | 3.29E-07   | 0.233136991 | 0.355037292 |
| cg12526443 | 12 | 3.37E-05   | 0.428478389 | 0.550188202 |
| cg14431024 | 2  | 0.00020272 | 0.509080773 | 0.630754924 |
| cg14868128 | 6  | 7.11E-05   | 0.262088256 | 0.383701783 |
| cg22369879 | 3  | 1.92E-06   | 0.195620679 | 0.317232669 |
| cg13740834 | 7  | 0.00024496 | 0.593606127 | 0.715082033 |
| cg20811755 | 17 | 0.00109784 | 0.648854695 | 0.770309875 |
| cg23751110 | 4  | 1.69E-05   | 0.311147464 | 0.432587969 |
| cg22919863 | 10 | 7.33E-06   | 0.65474669  | 0.776172506 |
| cg25560696 | 6  | 0.04139466 | 0.547600517 | 0.6689916   |
| cg05516295 | 5  | 1.81E-09   | 0.104674048 | 0.225872322 |
| cg27269917 | 17 | 1.72E-08   | 0.608868492 | 0.730017684 |
| cg00083790 | 12 | 6.55E-13   | 0.484830971 | 0.605941314 |
| cg06013895 | 17 | 0.00019428 | 0.504841363 | 0.625887139 |



|            |    |            |             |             |
|------------|----|------------|-------------|-------------|
| cg20814158 | 2  | 5.43E-05   | 0.641969016 | 0.76289739  |
| cg11135937 | 14 | 0.00060996 | 0.235722121 | 0.35643647  |
| cg00775939 | 10 | 8.64E-05   | 0.317968181 | 0.438561111 |
| cg05412531 | 8  | 1.09E-05   | 0.544171741 | 0.664653824 |
| cg27110521 | 14 | 1.77E-05   | 0.535168121 | 0.655640104 |
| cg10717189 | 2  | 6.67E-09   | 0.188727042 | 0.30918115  |
| cg06100240 | 1  | 1.63E-07   | 0.527781797 | 0.64821735  |
| cg16711011 | 2  | 8.58E-07   | 0.230846047 | 0.351239583 |
| cg10175249 | 10 | 2.25E-07   | 0.586390445 | 0.706775043 |
| cg04662836 | 15 | 6.90E-05   | 0.634692404 | 0.754971946 |
| cg10311225 | 20 | 0.00181893 | 0.384981569 | 0.505162259 |
| cg02694884 | 8  | 9.48E-07   | 0.592403118 | 0.712580488 |
| cg06233186 | 12 | 0.00157103 | 0.250138714 | 0.370278378 |
| cg26608663 | 16 | 2.50E-10   | 0.424483021 | 0.544580705 |
| cg01066588 | 16 | 1.52E-05   | 0.366331394 | 0.486396854 |
| cg20142213 | 8  | 3.86E-06   | 0.225498755 | 0.345469433 |
| cg04323785 | 20 | 3.21E-07   | 0.389655992 | 0.509605115 |
| cg05033701 | 2  | 1.30E-09   | 0.470155063 | 0.589983143 |
| cg17481703 | 13 | 1.32E-06   | 0.307751157 | 0.427557245 |
| cg09378456 | 7  | 1.66E-05   | 0.605418918 | 0.725210613 |
| cg08393805 | 5  | 6.66E-10   | 0.256872366 | 0.376646774 |
| cg10018522 | 1  | 0.00258103 | 0.349515404 | 0.469243378 |
| cg13820434 | 2  | 5.45E-07   | 0.565535942 | 0.68521035  |
| cg12947035 | 19 | 6.23E-07   | 0.604146766 | 0.723810212 |
| cg14447710 | 9  | 4.60E-09   | 0.729543848 | 0.8491914   |
| cg22716950 | 4  | 6.43E-08   | 0.552160098 | 0.671781565 |
| cg02702011 | 15 | 1.11E-06   | 0.606277266 | 0.725784799 |
| cg06383233 | 4  | 0.00029785 | 0.652256817 | 0.771734037 |
| cg16668520 | 8  | 0.00502073 | 0.415280138 | 0.534343866 |
| cg19881557 | 14 | 2.60E-09   | 0.264824106 | 0.383838189 |
| cg17878320 | 5  | 0.00182131 | 0.377143569 | 0.496151634 |
| cg23685994 | 2  | 1.40E-06   | 0.56378582  | 0.68279159  |
| cg21097354 | 7  | 0.00474267 | 0.436339641 | 0.555327246 |
| cg03716125 | 2  | 5.97E-06   | 0.271484969 | 0.390472376 |
| cg24919344 | 5  | 2.28E-06   | 0.658110404 | 0.777074166 |
| cg10874319 | 4  | 2.23E-06   | 0.661315331 | 0.780209442 |
| cg00326161 | 6  | 1.86E-12   | 0.300133553 | 0.418976647 |
| cg18290233 | 5  | 0.00021229 | 0.278480092 | 0.397181    |
| cg18672716 | 2  | 4.85E-09   | 0.674311731 | 0.792954769 |
| cg19801646 | 13 | 2.27E-06   | 0.513535024 | 0.632079946 |
| cg16998564 | 1  | 0.00040691 | 0.49993885  | 0.618213072 |
| cg07521193 | 15 | 1.59E-05   | 0.725493645 | 0.843657287 |
| cg18211249 | 17 | 3.52E-06   | 0.397041764 | 0.515128726 |
| cg00126887 | 4  | 9.36E-05   | 0.527116418 | 0.645103097 |
| cg09862711 | 8  | 0.00201826 | 0.349850031 | 0.467769334 |
| cg03674744 | 1  | 0.0022772  | 0.635111264 | 0.752951091 |

|            |    |            |             |             |
|------------|----|------------|-------------|-------------|
| cg08949428 | 13 | 0.00019978 | 0.473241428 | 0.591076386 |
| cg20823348 | 2  | 8.18E-06   | 0.167211825 | 0.285032726 |
| cg26107642 | 5  | 0.00039483 | 0.231261001 | 0.349063595 |
| cg24935154 | 4  | 3.58E-08   | 0.699342921 | 0.817120172 |
| cg19734222 | 7  | 3.94E-08   | 0.24454644  | 0.362285064 |
| cg11847956 | 5  | 5.18E-11   | 0.126497409 | 0.244157182 |
| cg05257086 | 5  | 1.55E-08   | 0.723788971 | 0.841438235 |
| cg09266087 | 12 | 0.0033472  | 0.201777349 | 0.319393624 |
| cg08827274 | 3  | 1.57E-06   | 0.65676193  | 0.774373821 |
| cg08033998 | 14 | 0.0001514  | 0.61615054  | 0.733700582 |
| cg11117438 | 7  | 8.55E-10   | 0.289326226 | 0.406727966 |
| cg01230988 | 17 | 4.67E-05   | 0.190627799 | 0.307964815 |
| cg02511845 | 8  | 0.00057404 | 0.407765964 | 0.525043042 |
| cg01146324 | 13 | 1.44E-05   | 0.251041332 | 0.368195333 |
| cg16286755 | 18 | 1.09E-11   | 0.436713222 | 0.553848643 |
| cg16288630 | 5  | 0.00011721 | 0.529585152 | 0.64670378  |
| cg21658814 | 6  | 5.20E-07   | 0.561553706 | 0.678642878 |
| cg10165209 | 17 | 1.06E-07   | 0.362050787 | 0.479120038 |
| cg17855963 | 6  | 0.01520298 | 0.444366367 | 0.561366599 |
| cg24847427 | 7  | 9.86E-05   | 0.146147277 | 0.263138121 |
| cg24663419 | 2  | 8.42E-05   | 0.479314739 | 0.596281881 |
| cg00326788 | 6  | 0.00226461 | 0.656076407 | 0.773031998 |
| cg08290668 | 16 | 0.00699579 | 0.303412989 | 0.420368579 |
| cg18275589 | 5  | 1.09E-08   | 0.15386645  | 0.270737453 |
| cg24074783 | 3  | 0.00027269 | 0.500516782 | 0.617296453 |
| cg05987309 | 2  | 0.00049617 | 0.212281352 | 0.328880171 |
| cg01746550 | 2  | 4.80E-05   | 0.55136948  | 0.667918511 |
| cg02081019 | 5  | 0.00024528 | 0.274871602 | 0.391401072 |
| cg14299157 | 9  | 5.16E-11   | 0.181818758 | 0.29831407  |
| cg16466881 | 7  | 0.00463963 | 0.447947108 | 0.564410642 |
| cg06994502 | 17 | 6.62E-05   | 0.558703043 | 0.675099204 |
| cg06005098 | 16 | 7.86E-10   | 0.391058646 | 0.507403439 |
| cg06047587 | 3  | 2.13E-05   | 0.427362596 | 0.543553747 |
| cg21192370 | 9  | 1.04E-05   | 0.615528238 | 0.73170331  |
| cg21324402 | 6  | 4.63E-09   | 0.198309807 | 0.31440726  |
| cg20232291 | 3  | 2.49E-11   | 0.235540435 | 0.351635022 |
| cg18623649 | 10 | 0.00072727 | 0.393792347 | 0.509852692 |
| cg14279307 | 1  | 9.94E-06   | 0.400470085 | 0.516522075 |
| cg02326500 | 7  | 0.00230507 | 0.430082298 | 0.546042251 |
| cg18303437 | 3  | 1.70E-11   | 0.164324965 | 0.28021609  |
| cg18833559 | 7  | 1.45E-07   | 0.258427837 | 0.374316904 |
| cg06417878 | 2  | 4.83E-05   | 0.635596724 | 0.751415917 |
| cg20248654 | 13 | 0.00055406 | 0.39955171  | 0.515255524 |
| cg10467371 | 6  | 0.00067466 | 0.412791278 | 0.528379079 |
| cg02069592 | 14 | 9.21E-06   | 0.191386987 | 0.306880232 |
| cg07189366 | 6  | 0.00507053 | 0.369492912 | 0.484934978 |

|            |    |            |             |             |
|------------|----|------------|-------------|-------------|
| cg00463491 | 3  | 0.00114412 | 0.213446646 | 0.328784237 |
| cg11710595 | 2  | 4.34E-08   | 0.699478993 | 0.814784478 |
| cg17687551 | 3  | 1.11E-06   | 0.305565043 | 0.420716683 |
| cg08312765 | 12 | 1.06E-06   | 0.202058863 | 0.317202559 |
| cg08339979 | 6  | 1.11E-09   | 0.149648465 | 0.264736906 |
| cg18808929 | 8  | 0.00027041 | 0.265422236 | 0.38040347  |
| cg05419096 | 13 | 1.72E-06   | 0.276398149 | 0.391371616 |
| cg04095995 | 6  | 2.26E-06   | 0.512664619 | 0.627607879 |
| cg05706649 | 1  | 4.58E-06   | 0.393637146 | 0.508576344 |
| cg18106366 | 14 | 0.0011343  | 0.328727853 | 0.443637769 |
| cg07247778 | 6  | 1.79E-06   | 0.374731845 | 0.489630803 |
| cg05296188 | 6  | 7.13E-07   | 0.63609545  | 0.750965698 |
| cg13903070 | 1  | 3.67E-05   | 0.264303748 | 0.379145258 |
| cg18585396 | 10 | 0.00717182 | 0.438738003 | 0.553575969 |
| cg13695075 | 14 | 9.41E-07   | 0.560835576 | 0.675645856 |
| cg25967170 | 12 | 0.0003678  | 0.330615507 | 0.445173344 |
| cg06177459 | 8  | 2.87E-05   | 0.303386208 | 0.417903893 |
| cg19629428 | 1  | 3.57E-05   | 0.329288034 | 0.443781381 |
| cg05682319 | 5  | 5.55E-05   | 0.54456902  | 0.659056666 |
| cg12657025 | 1  | 0.00440907 | 0.592713182 | 0.707138825 |
| cg19453488 | 14 | 9.91E-06   | 0.311660867 | 0.425971746 |
| cg24205414 | 2  | 9.48E-07   | 0.548553112 | 0.662848665 |
| cg25028404 | 1  | 1.88E-05   | 0.466121436 | 0.580300994 |
| cg11469908 | 2  | 5.50E-09   | 0.200069868 | 0.314192136 |
| cg14994447 | 1  | 8.65E-08   | 0.611814357 | 0.725887672 |
| cg00225196 | 8  | 0.00036537 | 0.469090979 | 0.58310831  |
| cg03953506 | 12 | 0.00161897 | 0.327523551 | 0.44141873  |
| cg25595388 | 5  | 1.39E-08   | 0.450907298 | 0.564744926 |
| cg15424233 | 2  | 0.00025383 | 0.532164838 | 0.645902055 |
| cg00339682 | 4  | 0.00884014 | 0.456839366 | 0.570407171 |
| cg14360405 | 11 | 0.00045947 | 0.331748405 | 0.445126946 |
| cg16012162 | 1  | 3.08E-08   | 0.516377889 | 0.62973918  |
| cg02177168 | 2  | 0.00064725 | 0.329842224 | 0.443115211 |
| cg20174393 | 7  | 0.0030374  | 0.397270432 | 0.510478915 |
| cg26088680 | 14 | 1.42E-05   | 0.573058019 | 0.686219888 |
| cg27265404 | 4  | 8.95E-06   | 0.53544457  | 0.648568982 |
| cg03131729 | 11 | 8.26E-07   | 0.206542054 | 0.319572152 |
| cg27654476 | 14 | 3.20E-08   | 0.445638718 | 0.558667732 |
| cg02587606 | 10 | 0.0070319  | 0.415961078 | 0.528968488 |
| cg17743732 | 2  | 5.64E-06   | 0.383378694 | 0.496378392 |
| cg02939659 | 14 | 6.24E-05   | 0.750911917 | 0.863651364 |
| cg08903619 | 13 | 2.76E-09   | 0.511607676 | 0.624132967 |
| cg08870914 | 17 | 0.00028191 | 0.493194538 | 0.605660245 |
| cg07216436 | 3  | 3.77E-05   | 0.268428946 | 0.380856125 |
| cg25370412 | 4  | 0.00050652 | 0.480425695 | 0.592819253 |
| cg07095894 | 11 | 0.00057784 | 0.397238439 | 0.509629166 |

|            |    |            |             |             |
|------------|----|------------|-------------|-------------|
| cg07774193 | 5  | 0.00062917 | 0.517840726 | 0.630191883 |
| cg12426653 | 13 | 4.10E-05   | 0.583459415 | 0.695740311 |
| cg12027135 | 4  | 2.32E-05   | 0.504685856 | 0.616913046 |
| cg20335293 | 2  | 2.75E-05   | 0.40449613  | 0.516719894 |
| cg19689506 | 15 | 0.00012842 | 0.554363036 | 0.666513081 |
| cg14944398 | 7  | 0.0002666  | 0.259986318 | 0.372081302 |
| cg11747081 | 13 | 0.00039179 | 0.38659714  | 0.498587356 |
| cg03035115 | 16 | 0.00064342 | 0.415537601 | 0.52730616  |
| cg02343628 | 15 | 4.22E-09   | 0.643133465 | 0.754859467 |
| cg23220769 | 13 | 5.64E-09   | 0.463226844 | 0.574887119 |
| cg26896771 | 15 | 4.92E-10   | 0.324938871 | 0.436523978 |
| cg09636436 | 2  | 1.35E-07   | 0.586764223 | 0.698302227 |
| cg07581680 | 2  | 0.00035569 | 0.202607716 | 0.314144213 |
| cg10652915 | 10 | 2.91E-05   | 0.160203981 | 0.271736113 |
| cg14983236 | 1  | 3.79E-05   | 0.626204932 | 0.737723293 |
| cg09459955 | 6  | 1.04E-07   | 0.683668389 | 0.795150855 |
| cg07343174 | 18 | 4.23E-06   | 0.554017187 | 0.665444788 |
| cg23093664 | 2  | 5.97E-08   | 0.229932694 | 0.341262796 |
| cg05954780 | 15 | 4.10E-08   | 0.7061198   | 0.817449084 |
| cg22826136 | 5  | 1.74E-08   | 0.559354174 | 0.670560131 |
| cg23226168 | 2  | 0.00511863 | 0.561805286 | 0.673002866 |
| cg07190903 | 11 | 2.40E-10   | 0.273011907 | 0.384182652 |
| cg17533533 | 7  | 1.83E-06   | 0.561383412 | 0.672452632 |
| cg00574206 | 12 | 0.00765145 | 0.556093956 | 0.667113204 |
| cg09348580 | 19 | 0.0004801  | 0.290004962 | 0.400895513 |
| cg06554036 | 8  | 5.80E-06   | 0.662336471 | 0.773167336 |
| cg11990334 | 19 | 0.00130461 | 0.546021166 | 0.656842884 |
| cg08133062 | 6  | 0.00101838 | 0.3821979   | 0.493001609 |
| cg13294084 | 2  | 0.00884554 | 0.673529004 | 0.784263684 |
| cg25287198 | 4  | 0.00457816 | 0.324527802 | 0.43525597  |
| cg18211761 | 8  | 0.00858191 | 0.405721431 | 0.516403347 |
| cg08650132 | 10 | 2.33E-05   | 0.655985801 | 0.7666583   |
| cg27502088 | 15 | 1.54E-07   | 0.251710812 | 0.362289942 |
| cg08757924 | 4  | 0.00022342 | 0.336065222 | 0.446584919 |
| cg02964087 | 16 | 8.43E-05   | 0.421561209 | 0.531961286 |
| cg27144055 | 16 | 4.19E-06   | 0.280405877 | 0.390775074 |
| cg21501167 | 4  | 2.59E-06   | 0.531447551 | 0.64166351  |
| cg16845701 | 11 | 0.00425641 | 0.298540132 | 0.408747363 |
| cg00039129 | 6  | 2.61E-05   | 0.240955214 | 0.351110656 |
| cg12000760 | 6  | 3.78E-05   | 0.356046959 | 0.466163497 |
| cg05943077 | 14 | 5.07E-05   | 0.458156197 | 0.568233152 |
| cg01188146 | 12 | 4.23E-06   | 0.359044408 | 0.469076536 |
| cg06011086 | 8  | 6.06E-05   | 0.39928029  | 0.509289381 |
| cg06853697 | 1  | 7.00E-09   | 0.652503763 | 0.762423681 |
| cg14264793 | 1  | 9.80E-10   | 0.629175627 | 0.73906352  |
| cg10323531 | 7  | 5.06E-12   | 0.302574257 | 0.412390853 |

|            |    |            |             |             |
|------------|----|------------|-------------|-------------|
| cg19679302 | 7  | 0.00024584 | 0.570657335 | 0.680332345 |
| cg26013796 | 12 | 0.00051582 | 0.379240818 | 0.488912212 |
| cg03666350 | 2  | 0.01039108 | 0.349275395 | 0.458930942 |
| cg19080233 | 5  | 0.00117437 | 0.167930816 | 0.277579789 |
| cg13294846 | 5  | 0.00566098 | 0.616013067 | 0.725619467 |
| cg08037684 | 6  | 0.01875096 | 0.39364872  | 0.50311955  |
| cg08798685 | 6  | 0.00180478 | 0.525677846 | 0.635110482 |
| cg09071834 | 2  | 0.04285118 | 0.439523827 | 0.548941968 |
| cg15320349 | 8  | 5.23E-09   | 0.341150954 | 0.450566832 |
| cg00566961 | 5  | 0.00551646 | 0.551307371 | 0.660641776 |
| cg02525719 | 4  | 0.00595873 | 0.326227663 | 0.435503593 |
| cg15909725 | 11 | 4.96E-06   | 0.692397007 | 0.801665546 |
| cg08871474 | 16 | 2.13E-08   | 0.644180054 | 0.753444033 |
| cg09287096 | 10 | 8.66E-12   | 0.686384949 | 0.79562747  |
| cg08577607 | 7  | 0.00020527 | 0.290618747 | 0.399815963 |
| cg23254393 | 4  | 2.99E-12   | 0.119307013 | 0.228472516 |
| cg24153924 | 1  | 1.60E-05   | 0.381644684 | 0.490706713 |
| cg13572592 | 12 | 8.48E-05   | 0.377348651 | 0.486384874 |
| cg23943309 | 5  | 4.71E-05   | 0.63076672  | 0.739768692 |
| cg20703790 | 7  | 1.89E-07   | 0.599553495 | 0.708296568 |
| cg13212080 | 14 | 7.88E-07   | 0.37185249  | 0.480524295 |
| cg08648281 | 19 | 3.70E-12   | 0.186815071 | 0.295479482 |
| cg12927252 | 2  | 0.00095623 | 0.342051587 | 0.450713809 |
| cg13252730 | 14 | 0.00481922 | 0.359648723 | 0.468262021 |
| cg18808318 | 18 | 3.20E-06   | 0.624119507 | 0.732652831 |
| cg14467794 | 3  | 0.0016288  | 0.590330007 | 0.698820195 |
| cg23082635 | 3  | 0.00154502 | 0.244232949 | 0.352672972 |
| cg00077285 | 15 | 2.82E-06   | 0.645738643 | 0.754163601 |
| cg22893755 | 17 | 0.00015149 | 0.434237369 | 0.542642087 |
| cg13065299 | 1  | 0.00012654 | 0.309376723 | 0.417765574 |
| cg07534892 | 12 | 5.72E-05   | 0.336703724 | 0.444984216 |
| cg08956474 | 10 | 4.90E-05   | 0.201180286 | 0.30939858  |
| cg00100804 | 9  | 0.00478943 | 0.356733193 | 0.464943124 |
| cg06504925 | 11 | 0.00155271 | 0.533936003 | 0.642026158 |
| cg27387239 | 1  | 4.65E-07   | 0.217076235 | 0.325139698 |
| cg20578612 | 7  | 9.60E-08   | 0.536843609 | 0.644904947 |
| cg22658758 | 5  | 1.26E-06   | 0.223983581 | 0.332017243 |
| cg04141975 | 5  | 0.00198992 | 0.406443089 | 0.514398065 |
| cg14067233 | 9  | 4.37E-06   | 0.6373599   | 0.745301275 |
| cg21605772 | 5  | 0.00099978 | 0.368351374 | 0.476225022 |
| cg25750209 | 2  | 9.32E-05   | 0.63089832  | 0.738722096 |
| cg10151901 | 15 | 0.0039318  | 0.615380481 | 0.723190968 |
| cg00270141 | 2  | 9.62E-08   | 0.733032309 | 0.840836672 |
| cg11404945 | 1  | 5.73E-06   | 0.429975191 | 0.537669481 |
| cg20853361 | 2  | 2.75E-05   | 0.621330619 | 0.729006313 |
| cg19325132 | 2  | 7.14E-08   | 0.224213727 | 0.331753751 |

|            |    |            |             |             |
|------------|----|------------|-------------|-------------|
| cg24407133 | 7  | 1.41E-05   | 0.500797847 | 0.608168131 |
| cg07698039 | 10 | 0.000191   | 0.391512041 | 0.498845385 |
| cg11592242 | 8  | 1.41E-06   | 0.317749279 | 0.425026211 |
| cg25607216 | 11 | 1.08E-06   | 0.252406168 | 0.359673176 |
| cg25017403 | 15 | 4.02E-06   | 0.250078771 | 0.357217817 |
| cg26572608 | 15 | 0.00045243 | 0.471193313 | 0.578324741 |
| cg06738955 | 18 | 0.00595569 | 0.265359532 | 0.372464538 |
| cg16563187 | 16 | 1.63E-05   | 0.58999309  | 0.697071804 |
| cg03402120 | 11 | 2.72E-08   | 0.562217441 | 0.669245418 |
| cg03913423 | 2  | 8.82E-09   | 0.585494014 | 0.692221604 |
| cg14120534 | 2  | 0.00705388 | 0.584890024 | 0.691564378 |
| cg13488811 | 11 | 0.00023102 | 0.3212282   | 0.427739839 |
| cg15107871 | 6  | 1.67E-06   | 0.518900388 | 0.62537222  |
| cg10012920 | 11 | 8.41E-12   | 0.607967698 | 0.714397151 |
| cg17855264 | 15 | 5.30E-13   | 0.084738398 | 0.191095543 |
| cg13016619 | 2  | 0.00014303 | 0.52130251  | 0.627656644 |
| cg11045531 | 10 | 0.00125625 | 0.477477624 | 0.583773147 |
| cg08371140 | 10 | 7.92E-05   | 0.510776022 | 0.617053905 |
| cg14654239 | 8  | 1.75E-07   | 0.643075121 | 0.749344676 |
| cg04249742 | 10 | 8.48E-05   | 0.261548623 | 0.367804321 |
| cg10541663 | 3  | 0.00702551 | 0.273088125 | 0.379307894 |
| cg17501906 | 1  | 4.85E-05   | 0.207236563 | 0.313388347 |
| cg24409876 | 1  | 4.98E-10   | 0.214398822 | 0.320441542 |
| cg24920933 | 7  | 0.00012165 | 0.385612096 | 0.491554836 |
| cg11821637 | 12 | 1.04E-15   | 0.142983666 | 0.248925966 |
| cg23888021 | 12 | 9.09E-08   | 0.611682848 | 0.717486533 |
| cg01353960 | 2  | 0.00010992 | 0.42037616  | 0.5261373   |
| cg21717348 | 7  | 1.95E-07   | 0.21297018  | 0.318705142 |
| cg06462543 | 2  | 1.72E-06   | 0.291893131 | 0.397509403 |
| cg14148981 | 14 | 0.00790903 | 0.342427079 | 0.44803815  |
| cg05490308 | 19 | 1.31E-07   | 0.60998212  | 0.715577612 |
| cg08474521 | 7  | 0.00091913 | 0.269449693 | 0.375013844 |
| cg01417364 | 12 | 3.78E-05   | 0.469658847 | 0.575162878 |
| cg24926589 | 2  | 0.00157174 | 0.506738994 | 0.612238305 |
| cg18742433 | 10 | 0.00572303 | 0.485281231 | 0.590690215 |
| cg26270263 | 2  | 0.00039912 | 0.441163872 | 0.546561153 |
| cg26351614 | 7  | 0.00024101 | 0.406134058 | 0.51147497  |
| cg10809134 | 2  | 2.12E-09   | 0.614691804 | 0.719962629 |
| cg04004561 | 12 | 0.00395612 | 0.328741103 | 0.43389218  |
| cg11823603 | 5  | 0.00012475 | 0.654701165 | 0.759843582 |
| cg00270974 | 6  | 0.00370653 | 0.15681102  | 0.261914783 |
| cg18250736 | 3  | 3.45E-06   | 0.595157349 | 0.700258574 |
| cg02015741 | 5  | 5.74E-07   | 0.212316987 | 0.317358655 |
| cg20389063 | 6  | 0.00023594 | 0.365646011 | 0.470647738 |
| cg27535214 | 2  | 0.00035408 | 0.627601176 | 0.732588049 |
| cg11584101 | 1  | 1.28E-10   | 0.445421031 | 0.550401742 |

|            |    |            |             |             |
|------------|----|------------|-------------|-------------|
| cg14272084 | 14 | 0.00331898 | 0.361888009 | 0.466849236 |
| cg08024548 | 7  | 5.30E-10   | 0.444970906 | 0.549924506 |
| cg08299265 | 12 | 0.00115425 | 0.511979292 | 0.616836409 |
| cg00354775 | 20 | 3.15E-07   | 0.567671061 | 0.672480976 |
| cg23884406 | 20 | 3.53E-06   | 0.512167719 | 0.616943747 |
| cg22905192 | 4  | 7.43E-07   | 0.221594757 | 0.326317064 |
| cg00017429 | 14 | 0.0001766  | 0.359111313 | 0.46378526  |
| cg06581409 | 19 | 0.00479601 | 0.371373064 | 0.476045193 |
| cg10506844 | 10 | 0.00061602 | 0.2575325   | 0.362142702 |
| cg18307783 | 5  | 2.29E-05   | 0.375884284 | 0.480459719 |
| cg13076829 | 18 | 3.54E-06   | 0.258494215 | 0.362993012 |
| cg02560081 | 7  | 7.70E-09   | 0.319964982 | 0.42442229  |
| cg22611523 | 10 | 7.54E-07   | 0.184968282 | 0.289413162 |
| cg19596983 | 15 | 0.00034393 | 0.274367203 | 0.378594239 |
| cg07533422 | 5  | 1.53E-06   | 0.2699321   | 0.374122357 |
| cg10969209 | 1  | 2.61E-05   | 0.149896561 | 0.254050212 |
| cg24458756 | 2  | 2.84E-10   | 0.642523418 | 0.746659752 |
| cg25438876 | 5  | 0.00034417 | 0.244290629 | 0.348390332 |
| cg05376017 | 6  | 0.00072427 | 0.299340897 | 0.403357522 |
| cg08951452 | 8  | 9.21E-05   | 0.226822666 | 0.330830807 |
| cg19547330 | 5  | 0.01317264 | 0.213715257 | 0.317690927 |
| cg07557630 | 5  | 2.75E-08   | 0.598457029 | 0.702426303 |
| cg15026265 | 12 | 4.91E-05   | 0.207791172 | 0.311743577 |
| cg07077965 | 2  | 5.61E-07   | 0.243601837 | 0.347481903 |
| cg24979167 | 7  | 2.00E-10   | 0.121933185 | 0.225801996 |
| cg00490004 | 3  | 0.00053179 | 0.556722556 | 0.660536291 |
| cg16059991 | 15 | 1.83E-06   | 0.302239551 | 0.406052997 |
| cg06784545 | 1  | 8.66E-07   | 0.256586397 | 0.36035935  |
| cg21540970 | 2  | 0.00038139 | 0.461091959 | 0.564864845 |
| cg12039595 | 1  | 2.43E-05   | 0.327224371 | 0.430984518 |
| cg13824877 | 6  | 1.73E-05   | 0.552987616 | 0.656731902 |
| cg17059694 | 2  | 0.00053285 | 0.275848518 | 0.379550178 |
| cg13877452 | 9  | 0.00062184 | 0.565260073 | 0.668883772 |
| cg02283204 | 6  | 3.07E-08   | 0.134025804 | 0.237623148 |
| cg24090990 | 1  | 8.64E-05   | 0.20474732  | 0.308320549 |
| cg05047706 | 8  | 0.03966059 | 0.657802965 | 0.761367839 |
| cg01091645 | 16 | 0.0111434  | 0.244340277 | 0.347832004 |
| cg03465049 | 16 | 1.29E-05   | 0.49009716  | 0.59348439  |
| cg01450566 | 20 | 1.59E-05   | 0.476134552 | 0.579504625 |
| cg05509190 | 2  | 9.69E-08   | 0.220224842 | 0.323576091 |
| cg27156041 | 7  | 5.84E-09   | 0.598802073 | 0.70213857  |
| cg07316846 | 2  | 2.79E-05   | 0.531108173 | 0.634436327 |
| cg15672653 | 11 | 1.84E-06   | 0.2320767   | 0.335378324 |
| cg02391713 | 6  | 2.44E-06   | 0.271921179 | 0.375200124 |
| cg11078040 | 17 | 2.87E-07   | 0.669801245 | 0.773038235 |
| cg00278984 | 6  | 0.00031168 | 0.429899355 | 0.533119338 |

|            |    |            |             |             |
|------------|----|------------|-------------|-------------|
| cg11212451 | 5  | 9.99E-07   | 0.136389153 | 0.239603823 |
| cg13026629 | 14 | 0.00011633 | 0.248499099 | 0.351695714 |
| cg13891768 | 4  | 9.48E-07   | 0.117982153 | 0.221157085 |
| cg06596221 | 12 | 0.00010535 | 0.437310557 | 0.540419701 |
| cg22006640 | 4  | 2.33E-11   | 0.157026451 | 0.260124245 |
| cg23229143 | 6  | 0.00169853 | 0.614731358 | 0.717773831 |
| cg19481513 | 5  | 0.0012829  | 0.220513074 | 0.323485441 |
| cg20797188 | 16 | 0.01783221 | 0.46176576  | 0.564737293 |
| cg09631769 | 22 | 2.61E-06   | 0.244132943 | 0.34707724  |
| cg22620090 | 6  | 4.19E-06   | 0.224507275 | 0.327397107 |
| cg17258364 | 17 | 0.00010923 | 0.607383156 | 0.710272318 |
| cg15089826 | 1  | 0.00411062 | 0.293423601 | 0.396279545 |
| cg14538785 | 9  | 0.00010483 | 0.141813521 | 0.24466613  |
| cg27336587 | 15 | 0.00322707 | 0.618859728 | 0.72160132  |
| cg25370567 | 13 | 1.09E-06   | 0.126467256 | 0.229134854 |
| cg13226457 | 2  | 5.46E-10   | 0.268170884 | 0.370829098 |
| cg09765089 | 7  | 3.74E-06   | 0.230195799 | 0.332844362 |
| cg02067239 | 16 | 0.00936092 | 0.257404712 | 0.360050141 |
| cg17667035 | 10 | 0.00079091 | 0.510329781 | 0.612928497 |
| cg13116158 | 8  | 0.0101495  | 0.442192573 | 0.544749965 |
| cg15281710 | 15 | 0.02088504 | 0.649848709 | 0.752386173 |
| cg09283120 | 10 | 0.00025812 | 0.400405496 | 0.502868879 |
| cg02595114 | 7  | 5.60E-10   | 0.576186369 | 0.678467152 |
| cg19888684 | 7  | 0.00063857 | 0.211317346 | 0.313590667 |
| cg14671000 | 2  | 3.32E-09   | 0.714072481 | 0.81626357  |
| cg02995791 | 10 | 1.74E-06   | 0.726087858 | 0.827955604 |
| cg21244580 | 8  | 0.00187647 | 0.310916971 | 0.412736235 |
| cg16405960 | 8  | 0.00843688 | 0.327053002 | 0.428766838 |
| cg04022561 | 5  | 4.56E-14   | 0.070396429 | 0.172088702 |
| cg02260710 | 16 | 2.14E-06   | 0.617389211 | 0.719078917 |
| cg01994252 | 12 | 2.46E-08   | 0.439094917 | 0.54077037  |
| cg08958251 | 11 | 2.78E-05   | 0.290809198 | 0.392456745 |
| cg23244948 | 14 | 1.02E-05   | 0.424190888 | 0.525819895 |
| cg13165983 | 2  | 0.02721855 | 0.259474712 | 0.361022286 |
| cg16811851 | 16 | 0.000109   | 0.501483494 | 0.602955538 |
| cg00442205 | 2  | 4.65E-05   | 0.24246894  | 0.343928546 |
| cg20486986 | 1  | 3.18E-05   | 0.427879499 | 0.529270798 |
| cg21015808 | 7  | 7.27E-09   | 0.269870499 | 0.371251782 |
| cg20786730 | 11 | 9.45E-05   | 0.421813525 | 0.523162491 |
| cg11182160 | 5  | 2.87E-07   | 0.313736066 | 0.415061151 |
| cg11165960 | 15 | 0.00035994 | 0.669767586 | 0.771003825 |
| cg20987429 | 8  | 2.82E-08   | 0.174067877 | 0.275289463 |
| cg08262608 | 13 | 3.14E-07   | 0.316022448 | 0.417223969 |
| cg27626334 | 11 | 1.53E-13   | 0.428098958 | 0.529251138 |
| cg25503888 | 3  | 3.01E-06   | 0.269892929 | 0.3709994   |
| cg05135499 | 10 | 9.52E-09   | 0.214280178 | 0.315365115 |



|            |    |            |             |             |
|------------|----|------------|-------------|-------------|
| cg01150411 | 2  | 0.00215788 | 0.368020134 | 0.469067016 |
| cg17466658 | 15 | 0.00369526 | 0.618115961 | 0.719153455 |
| cg09007841 | 16 | 0.00181223 | 0.231890691 | 0.332905997 |
| cg27243507 | 3  | 0.00011131 | 0.453017829 | 0.554007358 |
| cg17943922 | 4  | 9.33E-05   | 0.560435768 | 0.661423455 |
| cg01281649 | 15 | 5.93E-05   | 0.386653872 | 0.487561302 |
| cg13388769 | 3  | 9.14E-05   | 0.32683265  | 0.427691112 |
| cg23403144 | 5  | 7.89E-08   | 0.485949634 | 0.586707977 |
| cg17767057 | 5  | 0.00011311 | 0.523243478 | 0.623998264 |
| cg12379383 | 15 | 0.0002805  | 0.538824265 | 0.639572878 |
| cg07644196 | 2  | 0.00017411 | 0.318345358 | 0.419092139 |
| cg07419795 | 4  | 0.00288435 | 0.269959587 | 0.370653485 |
| cg18915691 | 17 | 5.42E-11   | 0.603633537 | 0.704296907 |
| cg23510764 | 5  | 0.00031133 | 0.241848482 | 0.342506781 |
| cg09309112 | 17 | 2.55E-06   | 0.487556574 | 0.588203865 |
| cg09371042 | 12 | 0.00081097 | 0.442914683 | 0.543543474 |
| cg18449426 | 10 | 2.37E-05   | 0.665900322 | 0.766432501 |
| cg26856596 | 11 | 8.92E-05   | 0.591992676 | 0.692523606 |
| cg18207201 | 4  | 0.00322363 | 0.223212105 | 0.32371052  |
| cg20312077 | 8  | 0.00069841 | 0.40106398  | 0.501482046 |
| cg21103316 | 7  | 1.63E-07   | 0.713298236 | 0.813658989 |
| cg25024214 | 1  | 5.31E-08   | 0.578136755 | 0.678479078 |
| cg20083186 | 3  | 0.00188161 | 0.302531534 | 0.402873619 |
| cg11350504 | 13 | 6.30E-07   | 0.558181461 | 0.658519896 |
| cg22253129 | 3  | 1.21E-06   | 0.572775424 | 0.673058941 |
| cg06329392 | 13 | 1.85E-05   | 0.455113338 | 0.555294749 |
| cg25973445 | 7  | 0.00021264 | 0.211385073 | 0.311547894 |
| cg11152463 | 1  | 5.41E-08   | 0.366270577 | 0.466422895 |
| cg15556591 | 4  | 0.00323796 | 0.295831188 | 0.395952973 |



















## Hypomethylated in OA hip

| Delta Beta   | Probe      | Gene        | CHR | adj.p.val  | Mean $\beta$ -<br>value OA<br>Knee |
|--------------|------------|-------------|-----|------------|------------------------------------|
| -0.139287664 | cg25710107 | A2LD1       | 13  | 2.73E-07   | 0.64148526                         |
| -0.168044102 | cg24545728 | AATK        | 17  | 6.57E-07   | 0.55139488                         |
| -0.144168925 | cg21660392 | ABCA8       | 17  | 0.00023836 | 0.59723997                         |
| -0.123346991 | cg02470904 | ABCB5;ABCB  | 7   | 0.00620433 | 0.56160941                         |
| -0.128540688 | cg02776283 | ABCB6       | 2   | 4.31E-05   | 0.79824358                         |
| -0.110570312 | cg01332683 | ABCC1;ABCC  | 16  | 7.35E-10   | 0.32616676                         |
| -0.11613205  | cg02672229 | ABCC2       | 10  | 4.31E-06   | 0.83427152                         |
| -0.164580377 | cg27243685 | ABCG1;ABCG  | 21  | 1.81E-07   | 0.76418016                         |
| -0.103054058 | cg17574812 | ABHD6       | 3   | 7.34E-07   | 0.43480919                         |
| -0.238247257 | cg01104073 | ABP1        | 7   | 1.68E-09   | 0.47915859                         |
| -0.121452702 | cg03703887 | ABTB2       | 11  | 5.83E-06   | 0.33700247                         |
| -0.123716321 | cg08866695 | ACACB       | 12  | 7.66E-09   | 0.5310322                          |
| -0.112358593 | cg08931456 | ACAP2       | 3   | 8.25E-05   | 0.66691546                         |
| -0.139495406 | cg22675767 | ACAP3       | 1   | 1.84E-07   | 0.4527709                          |
| -0.168173758 | cg14527333 | ACCN4;ACCN  | 2   | 4.01E-06   | 0.32063249                         |
| -0.136052453 | cg00555456 | ACN9        | 7   | 0.00019477 | 0.38195536                         |
| -0.115259111 | cg18038894 | ACSF2       | 17  | 2.24E-06   | 0.5154131                          |
| -0.238510981 | cg06572911 | ACSF3;ACSF3 | 16  | 4.98E-05   | 0.81212527                         |
| -0.110820384 | cg07474797 | ACSF3;ACSF3 | 16  | 0.00020855 | 0.79236925                         |
| -0.150249719 | cg18381395 | ACTN2       | 1   | 1.13E-07   | 0.83156374                         |
| -0.131200155 | cg07504040 | ACTN2       | 1   | 1.94E-08   | 0.66149777                         |
| -0.109872279 | cg18412431 | ACTN2       | 1   | 2.77E-10   | 0.62970026                         |
| -0.10038427  | cg24368226 | ADAMTS17    | 15  | 3.93E-05   | 0.41168859                         |
| -0.123893194 | cg15180869 | ADAMTS2;AI  | 5   | 0.03473458 | 0.84544362                         |
| -0.141787828 | cg07075085 | ADAMTS9     | 3   | 0.00036329 | 0.41955933                         |
| -0.148138779 | cg05904016 | ADAP1       | 7   | 0.00922188 | 0.43499812                         |
| -0.126918104 | cg21842920 | ADAP1       | 7   | 0.0079746  | 0.54525133                         |
| -0.105216402 | cg00363080 | ADARB2      | 10  | 6.91E-06   | 0.75276748                         |
| -0.145479863 | cg19254118 | ADAT3;SCAM  | 19  | 1.11E-09   | 0.79003885                         |
| -0.14448936  | cg01294521 | ADAT3;SCAM  | 19  | 2.77E-07   | 0.63583152                         |
| -0.107449883 | cg20243900 | ADAT3;SCAM  | 19  | 2.60E-09   | 0.77728108                         |
| -0.101965788 | cg01397065 | ADAT3;SCAM  | 19  | 1.27E-06   | 0.62929026                         |
| -0.210940252 | cg14396328 | ADCY1       | 7   | 0.00013367 | 0.7695229                          |
| -0.184381519 | cg05765011 | ADCY9       | 16  | 2.12E-08   | 0.74388385                         |
| -0.18182162  | cg00162104 | ADD1;ADD1;  | 4   | 1.03E-06   | 0.66572686                         |
| -0.155486721 | cg08826152 | ADORA2B     | 17  | 6.33E-05   | 0.70258335                         |
| -0.130795609 | cg01833057 | AFAP1;AFAP: | 4   | 0.00047364 | 0.50977999                         |
| -0.117377355 | cg07109358 | AFAP1;AFAP: | 4   | 4.10E-06   | 0.50627162                         |
| -0.112332084 | cg17455261 | AFF1        | 4   | 6.42E-06   | 0.39021747                         |

|              |            |             |    |            |            |
|--------------|------------|-------------|----|------------|------------|
| -0.111201626 | cg23497683 | AFF3        | 2  | 0.00034163 | 0.77290821 |
| -0.108762286 | cg23856611 | AGAP1;AGAF  | 2  | 0.02340364 | 0.39819847 |
| -0.108270927 | cg23836814 | AGBL2       | 11 | 0.00059845 | 0.63248144 |
| -0.102048807 | cg15664152 | AHCYL2;AHC  | 7  | 1.79E-05   | 0.31572884 |
| -0.143564771 | cg14426428 | AIM1        | 6  | 0.00177421 | 0.73653539 |
| -0.113219003 | cg00031779 | ALPK2       | 18 | 0.00020685 | 0.51560094 |
| -0.102630711 | cg13061976 | ALPK3       | 15 | 3.30E-10   | 0.7308318  |
| -0.123847097 | cg10063575 | AMHR2;AMH   | 12 | 2.78E-05   | 0.51272994 |
| -0.105285968 | cg23937993 | AMPD3;AMP   | 11 | 5.96E-05   | 0.4697376  |
| -0.113085249 | cg22308970 | AMPH;AMPH   | 7  | 2.52E-07   | 0.69885246 |
| -0.113669482 | cg06618764 | AMZ1        | 7  | 3.10E-07   | 0.49111485 |
| -0.10253393  | cg07677598 | ANK2        | 4  | 0.00012436 | 0.6604483  |
| -0.103022789 | cg09291474 | ANKDD1A     | 15 | 3.09E-10   | 0.37625987 |
| -0.139965867 | cg06567829 | ANKRD11     | 16 | 0.0001177  | 0.55372811 |
| -0.142829561 | cg01543603 | ANKRD11     | 16 | 1.18E-07   | 0.39771326 |
| -0.13259433  | cg08583277 | ANKRD11     | 16 | 5.41E-07   | 0.51418485 |
| -0.109404693 | cg02950892 | ANKRD2;ANK  | 10 | 7.27E-08   | 0.54136432 |
| -0.134759203 | cg22889914 | ANKRD2;ANK  | 10 | 1.54E-09   | 0.68565171 |
| -0.126573346 | cg00794673 | ANKS1A      | 6  | 0.03229354 | 0.68194109 |
| -0.115746888 | cg18447785 | ANKS1B      | 12 | 1.83E-06   | 0.75037222 |
| -0.159349094 | cg26340149 | ANO1;ANO1   | 11 | 7.94E-07   | 0.47835116 |
| -0.158237484 | cg00557996 | ANO1;ANO1   | 11 | 6.12E-07   | 0.46228243 |
| -0.116112883 | cg18771737 | ANO10       | 3  | 2.12E-11   | 0.85415908 |
| -0.134654982 | cg14107382 | ANO4        | 12 | 3.85E-08   | 0.48512054 |
| -0.112655093 | cg14707353 | AOX1        | 2  | 6.74E-06   | 0.81112302 |
| -0.159583926 | cg15908627 | AP2A2       | 11 | 0.00094693 | 0.65638883 |
| -0.11318212  | cg19220825 | AQP5        | 12 | 0.00120725 | 0.37115354 |
| -0.232188512 | cg19599611 | AQR         | 15 | 0.00024233 | 0.61430081 |
| -0.123425612 | cg06570358 | ARHGAP10    | 4  | 0.00072657 | 0.65877441 |
| -0.153266385 | cg03244997 | ARHGAP27    | 17 | 8.36E-09   | 0.44541406 |
| -0.105850273 | cg25246246 | ARHGAP27    | 17 | 1.73E-07   | 0.5377372  |
| -0.107469302 | cg27060340 | ARHGAP27;A  | 17 | 0.00017519 | 0.42075785 |
| -0.1384547   | cg14802312 | ARHGAP9;AR  | 12 | 0.01624699 | 0.48760353 |
| -0.110123779 | cg07694735 | ARHGEF10    | 8  | 0.0028893  | 0.58114425 |
| -0.180414771 | cg01824603 | ARHGEF10    | 8  | 2.06E-10   | 0.71837412 |
| -0.144460135 | cg27638453 | ARID1B;ARID | 6  | 3.56E-07   | 0.65603975 |
| -0.11553523  | cg02466798 | ARID3A      | 19 | 2.45E-11   | 0.28916694 |
| -0.229368106 | cg08553572 | ARID3A      | 19 | 0.00062429 | 0.86704664 |
| -0.171538012 | cg02001279 | ARID3A      | 19 | 7.09E-14   | 0.46984422 |
| -0.10071247  | cg18598117 | ARID3A      | 19 | 5.33E-16   | 0.60618463 |
| -0.128593057 | cg08894487 | ARID3A      | 19 | 1.23E-17   | 0.55837762 |
| -0.121345735 | cg06318796 | ARID5B      | 10 | 0.0001728  | 0.55934345 |
| -0.107053143 | cg27168076 | ARMC9       | 2  | 7.49E-08   | 0.34047871 |
| -0.105576709 | cg16468417 | ARPP-21     | 3  | 3.15E-09   | 0.49542645 |
| -0.182028318 | cg21852346 | ARPP-21;ARF | 3  | 2.77E-05   | 0.7365128  |
| -0.111754041 | cg23219253 | ASAP2;ASAP: | 2  | 4.52E-06   | 0.56308155 |

|              |            |              |    |            |            |
|--------------|------------|--------------|----|------------|------------|
| -0.100008267 | cg01956154 | ASB2;ASB2    | 14 | 6.84E-06   | 0.31007503 |
| -0.196854748 | cg21092030 | ASPG         | 14 | 0.00066017 | 0.64777536 |
| -0.14093857  | cg22293261 | ASPSCR1      | 17 | 0.00128781 | 0.80231063 |
| -0.139644638 | cg01461067 | ATOH8        | 2  | 7.26E-05   | 0.6160844  |
| -0.123662027 | cg19970086 | ATP11A;ATP:  | 13 | 8.78E-10   | 0.77052427 |
| -0.135855854 | cg02873074 | ATP11A;ATP:  | 13 | 3.23E-07   | 0.58225391 |
| -0.14724707  | cg14355581 | ATP5EP2      | 13 | 1.08E-12   | 0.57638283 |
| -0.160397399 | cg22288309 | ATP8B4       | 15 | 0.0022634  | 0.65851948 |
| -0.131957957 | cg20663852 | ATP9A        | 20 | 0.01934606 | 0.5160514  |
| -0.180225659 | cg00151370 | ATXN1;ATXN   | 6  | 0.00157946 | 0.40356654 |
| -0.147402209 | cg18411108 | ATXN7;ATXN   | 3  | 0.00023364 | 0.69662966 |
| -0.173901145 | cg19793499 | AUTS2;AUTS:  | 7  | 0.00012095 | 0.48213313 |
| -0.111982319 | cg04601228 | AUTS2;AUTS:  | 7  | 0.00077074 | 0.59728809 |
| -0.294852243 | cg01045337 | AXIN1;AXIN1  | 16 | 2.82E-05   | 0.68942294 |
| -0.110210686 | cg02086790 | AXIN1;AXIN1  | 16 | 8.57E-05   | 0.89397599 |
| -0.131768108 | cg27549619 | AXIN1;AXIN1  | 16 | 0.0007925  | 0.48838067 |
| -0.105192658 | cg12549411 | B3GALT5;B3G  | 21 | 0.00018821 | 0.4272523  |
| -0.170949776 | cg05617307 | BAG3         | 10 | 0.0009764  | 0.64858417 |
| -0.142843094 | cg00504599 | BAHCC1       | 17 | 0.00019113 | 0.83777525 |
| -0.122512995 | cg22230229 | BAHCC1       | 17 | 1.81E-05   | 0.78712722 |
| -0.155779667 | cg23515853 | BAHCC1       | 17 | 1.30E-09   | 0.77734067 |
| -0.170658167 | cg12846139 | BAHCC1       | 17 | 5.45E-11   | 0.84897175 |
| -0.170001927 | cg12349181 | BAIAP2;BAIA  | 17 | 0.0003563  | 0.65086541 |
| -0.186032753 | cg00935421 | BANP;BANP    | 16 | 0.00035163 | 0.61765267 |
| -0.10006456  | cg15055782 | BARX2        | 11 | 2.81E-07   | 0.59130437 |
| -0.101233996 | cg09800500 | BCAT1        | 12 | 2.44E-06   | 0.61695795 |
| -0.115476008 | cg09911747 | BCL11B;BCL1  | 14 | 4.20E-06   | 0.60543899 |
| -0.146425782 | cg19450111 | BCL11B;BCL1  | 14 | 0.00027455 | 0.61386112 |
| -0.2003778   | cg14841828 | BCL11B;BCL1  | 14 | 2.73E-06   | 0.59231351 |
| -0.110061183 | cg10020892 | BCL9         | 1  | 0.00158298 | 0.60010871 |
| -0.103166441 | cg15110101 | BEST1;BEST1  | 11 | 0.00133453 | 0.36156249 |
| -0.100834199 | cg13533456 | BET3L        | 6  | 0.00350219 | 0.62346545 |
| -0.132583278 | cg26427090 | BID;BID;BID  | 22 | 5.68E-07   | 0.58906319 |
| -0.103920588 | cg27405400 | BIN1;BIN1;BI | 2  | 1.78E-07   | 0.53390817 |
| -0.140559641 | cg27496339 | BLVRA        | 7  | 4.23E-09   | 0.36031807 |
| -0.100979415 | cg23623251 | BMP6         | 6  | 0.00113712 | 0.31019446 |
| -0.166728047 | cg20955836 | BMP7         | 20 | 0.00063019 | 0.61663177 |
| -0.109008929 | cg26760589 | BMP7         | 20 | 2.15E-06   | 0.45554553 |
| -0.11799471  | cg07781736 | BMP7         | 20 | 1.70E-05   | 0.59146655 |
| -0.143738598 | cg14478713 | BNC2         | 9  | 0.00144938 | 0.45225767 |
| -0.107947251 | cg12160741 | BRF1         | 14 | 2.16E-05   | 0.60786406 |
| -0.106304418 | cg19977004 | BRSK2        | 11 | 1.40E-09   | 0.65819957 |
| -0.158150543 | cg10002860 | BRSK2        | 11 | 4.32E-11   | 0.63743329 |
| -0.103142017 | cg08458711 | BSND         | 1  | 0.00054115 | 0.35410039 |
| -0.127420144 | cg02405193 | BTBD12       | 16 | 2.53E-06   | 0.73980138 |
| -0.183766007 | cg18286127 | C10orf84;C10 | 10 | 3.91E-05   | 0.54521402 |

|              |            |              |    |            |            |
|--------------|------------|--------------|----|------------|------------|
| -0.132850246 | cg21201830 | C11orf21;C1: | 11 | 0.002434   | 0.71333596 |
| -0.110559459 | cg21027517 | C11orf21;TSF | 11 | 0.00028407 | 0.66115191 |
| -0.112101056 | cg25961099 | C11orf21;TSF | 11 | 0.00018407 | 0.7554237  |
| -0.108499541 | cg01211906 | C11orf21;TSF | 11 | 6.72E-06   | 0.49536636 |
| -0.125466102 | cg09549304 | C11orf70     | 11 | 1.77E-06   | 0.68654608 |
| -0.11407049  | cg06579738 | C11orf92     | 11 | 0.00071126 | 0.6495219  |
| -0.110656299 | cg26467753 | C12orf59     | 12 | 1.20E-11   | 0.37013008 |
| -0.177932746 | cg21368143 | C12orf77     | 12 | 1.27E-05   | 0.70134871 |
| -0.174375548 | cg16484526 | C12orf77     | 12 | 4.45E-06   | 0.64079848 |
| -0.108744201 | cg14384178 | C13orf16     | 13 | 0.00324552 | 0.5423255  |
| -0.114330991 | cg13251181 | C13orf33     | 13 | 1.97E-05   | 0.39121742 |
| -0.128615648 | cg01533082 | C14orf37     | 14 | 1.07E-05   | 0.72363414 |
| -0.161172242 | cg05168580 | C14orf73     | 14 | 2.46E-05   | 0.63982837 |
| -0.152369624 | cg12861771 | C15orf27     | 15 | 1.00E-05   | 0.75934104 |
| -0.149593536 | cg12609829 | C15orf53     | 15 | 0.00642254 | 0.77426967 |
| -0.141947886 | cg20678353 | C15orf53     | 15 | 0.00109184 | 0.37532914 |
| -0.131367416 | cg08274633 | C15orf53     | 15 | 1.39E-05   | 0.82062645 |
| -0.122831369 | cg07835443 | C16orf55     | 16 | 0.00271523 | 0.55776824 |
| -0.114555192 | cg16725984 | C16orf55     | 16 | 0.00183284 | 0.770481   |
| -0.114285458 | cg15531249 | C16orf74     | 16 | 0.00357246 | 0.40224617 |
| -0.110485448 | cg05612839 | C16orf74     | 16 | 2.55E-09   | 0.30147414 |
| -0.12657896  | cg01713348 | C16orf91     | 16 | 8.81E-08   | 0.48515787 |
| -0.13548544  | cg22595391 | C17orf62;C1: | 17 | 0.00030428 | 0.53821925 |
| -0.11146658  | cg14145667 | C19orf22     | 19 | 1.25E-06   | 0.73647001 |
| -0.10327186  | cg23357435 | C19orf26     | 19 | 1.62E-06   | 0.77067296 |
| -0.103879682 | cg17344770 | C19orf71     | 19 | 2.79E-07   | 0.61516096 |
| -0.100273425 | cg23068939 | C1orf162     | 1  | 0.0005613  | 0.73798705 |
| -0.100627097 | cg23894854 | C1orf162;C1: | 1  | 2.57E-07   | 0.66775354 |
| -0.109020966 | cg14658964 | C1orf228     | 1  | 1.20E-07   | 0.65508438 |
| -0.117910869 | cg20793071 | C1orf83;TME  | 1  | 8.54E-10   | 0.54359159 |
| -0.105418626 | cg06874172 | C1orf92      | 1  | 2.23E-06   | 0.32966976 |
| -0.123929861 | cg00076653 | C1QTNF7      | 4  | 8.86E-06   | 0.57142242 |
| -0.136654741 | cg09695996 | C1QTNF8      | 16 | 0.00095814 | 0.50476726 |
| -0.102037573 | cg01512084 | C21orf2      | 21 | 0.0057029  | 0.69561693 |
| -0.103431898 | cg24316255 | C21orf2      | 21 | 0.00036838 | 0.50793975 |
| -0.103399491 | cg19902195 | C21orf67;C2: | 21 | 4.16E-07   | 0.66834564 |
| -0.100317413 | cg06684407 | C21orf67;C2: | 21 | 7.04E-08   | 0.55014286 |
| -0.10844136  | cg16071713 | C21orf96;RU  | 21 | 1.53E-06   | 0.72168949 |
| -0.100475959 | cg05644223 | C21orf96;RU  | 21 | 0.00065487 | 0.57386222 |
| -0.125141144 | cg04237429 | C22orf34     | 22 | 1.22E-06   | 0.58182827 |
| -0.118769935 | cg03461851 | C2CD4B       | 15 | 4.69E-07   | 0.40154998 |
| -0.140621927 | cg15490643 | C2orf34      | 2  | 0.00106117 | 0.50573381 |
| -0.114798377 | cg17979068 | C2orf48      | 2  | 2.87E-08   | 0.73936503 |
| -0.108137474 | cg23422170 | C2orf48      | 2  | 1.47E-12   | 0.79337851 |
| -0.120731429 | cg08692541 | C3orf20      | 3  | 0.00027105 | 0.63682858 |
| -0.176802592 | cg15912390 | C3orf21      | 3  | 0.00015877 | 0.45888915 |

|               |            |               |    |            |            |
|---------------|------------|---------------|----|------------|------------|
| -0.110204516  | cg23528247 | C3orf26;FILIF | 3  | 5.56E-11   | 0.62936566 |
| -0.192775809  | cg04246167 | C3orf67       | 3  | 0.00214848 | 0.54520667 |
| -0.142001443  | cg09373597 | C3orf72       | 3  | 0.00037663 | 0.68526219 |
| -0.107312234  | cg24851181 | C3orf72       | 3  | 1.49E-05   | 0.45282258 |
| -0.13219391   | cg04301614 | C4orf19;C4o   | 4  | 5.94E-07   | 0.8290108  |
| -0.117856625  | cg01170196 | C4orf31       | 4  | 9.11E-14   | 0.63782104 |
| -0.134850771  | cg13784474 | C4orf44;C4o   | 4  | 0.00036019 | 0.75612773 |
| -0.12680405   | cg15841665 | C4orf50       | 4  | 0.00135941 | 0.7775391  |
| -0.122881841  | cg06358671 | C4orf50       | 4  | 1.62E-06   | 0.50363575 |
| -0.109791325  | cg08651538 | C5orf13;C5o   | 5  | 5.69E-06   | 0.58770222 |
| -0.126252419  | cg04122815 | C5orf39       | 5  | 0.02373028 | 0.44766028 |
| -0.14948055   | cg04159302 | C5orf62       | 5  | 3.90E-06   | 0.53064882 |
| -0.121887516  | cg17039645 | C6orf10       | 6  | 4.72E-06   | 0.73978765 |
| -0.163984489  | cg03626892 | C6orf176      | 6  | 0.00273682 | 0.55698894 |
| -0.104577704  | cg19274606 | C6orf223      | 6  | 5.82E-08   | 0.35147726 |
| -0.155387625  | cg10009497 | C7orf50;C7o   | 7  | 0.00559138 | 0.81654454 |
| -0.145564166  | cg09526129 | C7orf50;C7o   | 7  | 0.00056637 | 0.84614369 |
| -0.12103276   | cg07538944 | C7orf50;C7o   | 7  | 5.76E-05   | 0.66116689 |
| -0.102319131  | cg18315380 | C7orf50;C7o   | 7  | 0.00040526 | 0.64752851 |
| -0.106024381  | cg19276186 | C8orf12       | 8  | 8.90E-05   | 0.65538889 |
| -0.172153216  | cg00420997 | C8orf75       | 8  | 4.19E-07   | 0.64890888 |
| -0.152402631  | cg13941801 | C9orf130      | 9  | 0.00057188 | 0.55160587 |
| -0.248497263  | cg06948222 | CA5A          | 16 | 0.0002081  | 0.55929093 |
| -0.197916628  | cg04874511 | CAB39L;CAB3   | 13 | 0.00020059 | 0.71929078 |
| -0.196171671  | cg02468320 | CACNA1C;CA    | 12 | 0.03895887 | 0.61908139 |
| -0.120947611  | cg23475725 | CACNA1C;CA    | 12 | 0.00021792 | 0.4433581  |
| -0.1111090264 | cg10516516 | CACNA2D3      | 3  | 5.57E-08   | 0.58742771 |
| -0.110045253  | cg12289251 | CACNB2;CAC    | 10 | 7.86E-06   | 0.57053876 |
| -0.112083351  | cg20697044 | CACNG4        | 17 | 5.49E-06   | 0.44596646 |
| -0.10561023   | cg14201467 | CADM1;CADM    | 11 | 0.00504006 | 0.72382394 |
| -0.123241379  | cg03505501 | CADM1;CADM    | 11 | 0.00260025 | 0.77542267 |
| -0.130619404  | cg03472610 | CADM2;CADM    | 3  | 4.62E-08   | 0.78050291 |
| -0.121936211  | cg26378073 | CALHM1        | 10 | 0.00013147 | 0.76214287 |
| -0.156201083  | cg09958065 | CAMK1D;CAI    | 10 | 0.0094561  | 0.58579041 |
| -0.11205474   | cg14160433 | CAMSAP1       | 9  | 6.21E-07   | 0.59630966 |
| -0.233864608  | cg09889997 | CAMTA1        | 1  | 1.65E-13   | 0.82750607 |
| -0.160286255  | cg12097989 | CAMTA1        | 1  | 8.06E-13   | 0.71237557 |
| -0.138750542  | cg03762572 | CAMTA1        | 1  | 1.37E-11   | 0.64996988 |
| -0.109603454  | cg06800235 | CAMTA1        | 1  | 3.57E-16   | 0.75272263 |
| -0.115289889  | cg27090078 | CAPG          | 2  | 3.65E-05   | 0.66589288 |
| -0.343151839  | cg04652208 | CAPN8         | 1  | 0.00669996 | 0.6417589  |
| -0.251826946  | cg13545089 | CAPS;CAPS     | 19 | 1.28E-06   | 0.66100369 |
| -0.180982625  | cg00876266 | CAPS;CAPS     | 19 | 5.63E-10   | 0.73945855 |
| -0.180367776  | cg27202779 | CARD11        | 7  | 1.06E-07   | 0.7690589  |
| -0.108765146  | cg17643624 | CARKD         | 13 | 1.77E-10   | 0.52899529 |
| -0.245899208  | cg02922734 | CARKD         | 13 | 1.17E-09   | 0.78215315 |

|              |            |             |    |            |            |
|--------------|------------|-------------|----|------------|------------|
| -0.17959994  | cg01016030 | CASZ1;CASZ1 | 1  | 1.43E-08   | 0.64854498 |
| -0.103428689 | cg13330050 | CCDC112;CCI | 5  | 9.49E-06   | 0.62896457 |
| -0.114627141 | cg10194602 | CCDC40      | 17 | 0.00211828 | 0.61663097 |
| -0.148294228 | cg20348765 | CCDC85A     | 2  | 0.00082334 | 0.54296064 |
| -0.131952475 | cg27621997 | CCDC86      | 11 | 4.89E-08   | 0.5307995  |
| -0.107625844 | cg13359689 | CCDC88A;CC  | 2  | 1.25E-12   | 0.44073768 |
| -0.250783059 | cg05233289 | CCDC88B     | 11 | 5.31E-07   | 0.52253599 |
| -0.13073921  | cg15175716 | CCDC88B     | 11 | 2.31E-10   | 0.52859981 |
| -0.116759237 | cg22663489 | CCDC88B;CCI | 11 | 3.95E-07   | 0.7408955  |
| -0.106624232 | cg14916288 | CCL23;CCL23 | 17 | 0.00026144 | 0.66515491 |
| -0.112259546 | cg11584277 | CCL23;CCL23 | 17 | 2.00E-07   | 0.28269308 |
| -0.209138449 | cg12594237 | CCND2       | 12 | 1.90E-06   | 0.86132085 |
| -0.105253627 | cg27317813 | CCND2       | 12 | 2.85E-08   | 0.73492274 |
| -0.182141632 | cg09799980 | CCND2       | 12 | 2.91E-08   | 0.67434473 |
| -0.107227614 | cg00417288 | CCND2       | 12 | 7.00E-07   | 0.82574323 |
| -0.122077274 | cg14834893 | CCND2       | 12 | 3.16E-12   | 0.44007347 |
| -0.101731209 | cg02021919 | CCNH        | 5  | 0.00023699 | 0.5042509  |
| -0.23783398  | cg04110105 | CCR2;CCR2;C | 3  | 0.00034667 | 0.64835387 |
| -0.191062056 | cg07513332 | CCR6        | 6  | 2.04E-07   | 0.66301302 |
| -0.178013974 | cg19688584 | CCR6        | 6  | 4.22E-07   | 0.52315177 |
| -0.139013578 | cg01606773 | CD109;CD109 | 6  | 0.00089843 | 0.59361021 |
| -0.189712417 | cg08614201 | CD160       | 1  | 0.00021027 | 0.74778691 |
| -0.156769668 | cg19355763 | CD1A        | 1  | 7.83E-07   | 0.83016304 |
| -0.153986654 | cg04332373 | CD38        | 4  | 0.00034035 | 0.61620808 |
| -0.118192141 | cg05200628 | CD48        | 1  | 0.00364007 | 0.66127913 |
| -0.153182035 | cg10180415 | CD58;CD58   | 1  | 0.00417973 | 0.53629301 |
| -0.105649501 | cg26427109 | CD6         | 11 | 0.0004534  | 0.84304677 |
| -0.121760785 | cg08792703 | CD6         | 11 | 1.01E-15   | 0.74193203 |
| -0.164541424 | cg19966212 | CD74;CD74;C | 5  | 2.21E-08   | 0.29078652 |
| -0.104892289 | cg08355301 | CD79B;CD79  | 17 | 3.16E-05   | 0.81956587 |
| -0.139041809 | cg21454485 | CD84        | 1  | 2.79E-06   | 0.48433907 |
| -0.167241081 | cg14276584 | CDC14B;CDC  | 9  | 0.00018958 | 0.67330958 |
| -0.143398088 | cg08080195 | CDC42EP3    | 2  | 0.00654368 | 0.55556754 |
| -0.121016277 | cg05236720 | CDC42EP3    | 2  | 0.00165117 | 0.57554678 |
| -0.105337582 | cg15703377 | CDC42EP4    | 17 | 1.73E-05   | 0.79906782 |
| -0.123597363 | cg16696923 | CDH17       | 8  | 5.30E-06   | 0.62751794 |
| -0.103653369 | cg03845852 | CDH18;CDH1  | 5  | 5.11E-06   | 0.68173028 |
| -0.119558717 | cg07975680 | CDH23;CDH2  | 10 | 3.64E-05   | 0.47176199 |
| -0.156120313 | cg19615295 | CDH26;CDH2  | 20 | 0.00193522 | 0.45697079 |
| -0.126304766 | cg05086443 | CDH5        | 16 | 1.29E-06   | 0.65196163 |
| -0.135623181 | cg11468993 | CDSN;PSORS  | 6  | 0.00041102 | 0.53105262 |
| -0.100201271 | cg04148753 | CDYL;CDYL;C | 6  | 4.17E-08   | 0.70433526 |
| -0.127781277 | cg03187073 | CDYL;CDYL;C | 6  | 3.55E-08   | 0.6221584  |
| -0.224944721 | cg27307183 | CDYL;CDYL;C | 6  | 1.62E-12   | 0.57151125 |
| -0.12091593  | cg07599389 | CDYL;CDYL;C | 6  | 4.69E-09   | 0.31208732 |
| -0.132634841 | cg00511167 | CEP63;CEP63 | 3  | 3.55E-05   | 0.75834788 |

|              |            |              |    |            |            |
|--------------|------------|--------------|----|------------|------------|
| -0.145137158 | cg01446692 | CER1         | 9  | 2.32E-07   | 0.65502561 |
| -0.106268419 | cg05922384 | CFH          | 1  | 5.20E-10   | 0.86914432 |
| -0.100530771 | cg15084803 | CHCHD4;CHC   | 3  | 5.16E-13   | 0.73857565 |
| -0.104256195 | cg07373212 | CHCHD6       | 3  | 2.07E-07   | 0.6002299  |
| -0.11729973  | cg15672498 | CHD5         | 1  | 3.73E-05   | 0.28912145 |
| -0.102704887 | cg01186595 | CHORDC1;CH   | 11 | 2.11E-11   | 0.72648036 |
| -0.108742346 | cg01796225 | CHORDC1;CH   | 11 | 1.45E-11   | 0.56366714 |
| -0.146161794 | cg10276834 | CHRM2;CHRI   | 7  | 8.29E-13   | 0.63778021 |
| -0.14254898  | cg11117177 | CHST11       | 12 | 0.00086293 | 0.54954122 |
| -0.100854529 | cg09237846 | CHST11       | 12 | 2.63E-06   | 0.65077411 |
| -0.1614763   | cg06930722 | CHST11       | 12 | 9.11E-06   | 0.63787875 |
| -0.136394082 | cg14496909 | CHSY1        | 15 | 4.31E-05   | 0.72089206 |
| -0.115025264 | cg11684450 | CIRBP;CIRBP; | 19 | 0.00240137 | 0.73393774 |
| -0.142786438 | cg24809529 | CLDN15       | 7  | 6.82E-06   | 0.28007412 |
| -0.171385604 | cg00027155 | CLEC16A      | 16 | 0.01653968 | 0.71500625 |
| -0.13342358  | cg04952324 | CLIP2;CLIP2  | 7  | 5.57E-08   | 0.76923152 |
| -0.112359193 | cg02330500 | CLMN         | 14 | 0.0048366  | 0.50337087 |
| -0.103541002 | cg13717541 | CLMN         | 14 | 2.32E-08   | 0.78531218 |
| -0.102358063 | cg03516335 | CLPB         | 11 | 5.13E-09   | 0.56979694 |
| -0.144481201 | cg24721964 | CLRN1;CLRN:  | 3  | 7.83E-10   | 0.47907016 |
| -0.105754425 | cg06627532 | CMIP         | 16 | 2.34E-06   | 0.53723614 |
| -0.218170546 | cg09685472 | CMIP         | 16 | 1.05E-10   | 0.51985222 |
| -0.177094464 | cg07285481 | CMIP;CMIP    | 16 | 5.54E-07   | 0.36978544 |
| -0.144919831 | cg09742346 | CMIP;CMIP    | 16 | 7.78E-08   | 0.78436405 |
| -0.206781136 | cg01425762 | CMIP;CMIP    | 16 | 1.60E-07   | 0.28720629 |
| -0.111780606 | cg08766256 | CMIP;CMIP    | 16 | 2.48E-07   | 0.44143522 |
| -0.111831977 | cg27133780 | CMTM7;CMT    | 3  | 1.76E-05   | 0.71079231 |
| -0.195138637 | cg11207515 | CNTNAP2      | 7  | 3.65E-05   | 0.34511961 |
| -0.19330296  | cg02673107 | COL11A2;CO   | 6  | 3.50E-09   | 0.59569508 |
| -0.178333069 | cg20631997 | COL11A2;CO   | 6  | 6.95E-06   | 0.33425051 |
| -0.140090242 | cg01212562 | COL18A1      | 21 | 1.80E-10   | 0.68360071 |
| -0.12000019  | cg16942644 | COL18A1      | 21 | 1.79E-08   | 0.64160209 |
| -0.112949959 | cg11113589 | COL18A1;CO   | 21 | 0.00133556 | 0.5632348  |
| -0.110930095 | cg22978940 | COL18A1;CO   | 21 | 1.21E-05   | 0.76552069 |
| -0.128145302 | cg11043002 | COL23A1      | 5  | 2.98E-07   | 0.52924146 |
| -0.148341302 | cg03842822 | COL23A1      | 5  | 1.56E-08   | 0.63534421 |
| -0.181819344 | cg01561304 | COL23A1      | 5  | 1.77E-12   | 0.41772494 |
| -0.105101579 | cg25153741 | COL23A1      | 5  | 7.40E-19   | 0.64240331 |
| -0.130970689 | cg16872841 | COL4A2       | 13 | 1.30E-06   | 0.65307377 |
| -0.132070959 | cg00765737 | COL4A2       | 13 | 2.04E-07   | 0.60047193 |
| -0.132436847 | cg12665414 | CPEB4        | 5  | 0.00012735 | 0.56957506 |
| -0.108850396 | cg09715009 | CPLX2        | 5  | 1.48E-07   | 0.49060476 |
| -0.103396285 | cg23756264 | CPT1A;CPT1A  | 11 | 0.00139939 | 0.77755952 |
| -0.106572434 | cg23100692 | CPZ;CPZ;CPZ  | 4  | 8.46E-12   | 0.73407982 |
| -0.155405591 | cg20315150 | CREB5;CREB5  | 7  | 1.74E-08   | 0.72130544 |
| -0.147045982 | cg09930712 | CREB5;CREB5  | 7  | 4.61E-05   | 0.33464008 |



|              |            |              |    |            |            |
|--------------|------------|--------------|----|------------|------------|
| -0.134487258 | cg13995399 | CREB5;CREB5  | 7  | 7.19E-09   | 0.42400789 |
| -0.119898332 | cg21159940 | CREB5;CREB5  | 7  | 5.21E-07   | 0.51363093 |
| -0.119748632 | cg17679427 | CREM;CREM    | 10 | 0.0004438  | 0.47510528 |
| -0.10865242  | cg16545105 | CRHBP;CRHB   | 5  | 1.11E-05   | 0.58761139 |
| -0.100157879 | cg05588903 | CRISPLD2     | 16 | 8.60E-07   | 0.77842563 |
| -0.114339741 | cg02069721 | CRISPLD2     | 16 | 0.0001416  | 0.39214694 |
| -0.196701551 | cg09967633 | CRISPLD2     | 16 | 5.88E-10   | 0.7424882  |
| -0.2443669   | cg07015183 | CRTC1;CRTC1  | 19 | 1.03E-06   | 0.76081438 |
| -0.101341068 | cg01129958 | CSGALNACT1   | 8  | 4.24E-05   | 0.63969159 |
| -0.108870064 | cg10085474 | CTBP1;CTBP1  | 4  | 5.02E-05   | 0.60392318 |
| -0.119323428 | cg18499250 | CTDSPL;CTDS  | 3  | 9.04E-08   | 0.57398367 |
| -0.165258926 | cg13753435 | CTNNA2;CTN   | 2  | 2.07E-05   | 0.42254259 |
| -0.110419456 | cg27004195 | CTNNA2;CTN   | 2  | 2.23E-06   | 0.49064918 |
| -0.132567444 | cg04141648 | CTNNA3       | 10 | 3.35E-14   | 0.80171101 |
| -0.132680591 | cg19996026 | CTNNA3;CTN   | 10 | 1.00E-06   | 0.60676645 |
| -0.10232606  | cg24141382 | CTPS         | 1  | 1.73E-06   | 0.72080768 |
| -0.169284236 | cg18245281 | CTSZ         | 20 | 0.00074494 | 0.83809411 |
| -0.129974846 | cg14191688 | CTTN;CTTN    | 11 | 5.41E-06   | 0.88368854 |
| -0.149118189 | cg15465439 | CTTN;CTTN    | 11 | 8.17E-05   | 0.76337501 |
| -0.145357938 | cg08914150 | CTTN;CTTN    | 11 | 1.16E-11   | 0.87992262 |
| -0.120792611 | cg02011981 | CTTN;CTTN    | 11 | 1.08E-16   | 0.88498066 |
| -0.127841208 | cg22720428 | CTTN;CTTN    | 11 | 6.44E-17   | 0.77281015 |
| -0.127088214 | cg12756527 | CUGBP2;CUC   | 10 | 6.43E-12   | 0.47143503 |
| -0.122835037 | cg25042258 | CUL1         | 7  | 5.43E-09   | 0.45835445 |
| -0.192530277 | cg12349350 | CUX1;CUX1;(  | 7  | 0.0081975  | 0.55129763 |
| -0.149047254 | cg07266412 | CUX1;CUX1;(  | 7  | 0.00289173 | 0.51415143 |
| -0.13412289  | cg14203426 | CUX1;CUX1;(  | 7  | 1.53E-06   | 0.63057277 |
| -0.218643828 | cg18483404 | CUZD1        | 10 | 4.95E-13   | 0.61343941 |
| -0.164863884 | cg01555705 | CX3CL1       | 16 | 9.72E-11   | 0.52672816 |
| -0.179210017 | cg14622819 | CXCL10;ARTE  | 4  | 3.22E-06   | 0.42077397 |
| -0.108273359 | cg01288089 | CXCL10;ARTE  | 4  | 4.29E-05   | 0.32514631 |
| -0.128870897 | cg22122808 | CYB561;CYB5  | 17 | 2.87E-05   | 0.63481222 |
| -0.139601816 | cg23378365 | CYFIP2;CYFIP | 5  | 3.67E-06   | 0.40936336 |
| -0.1304573   | cg08289350 | CYGB         | 17 | 6.64E-05   | 0.4248795  |
| -0.15885123  | cg17347634 | CYP7B1       | 8  | 1.60E-05   | 0.46045809 |
| -0.133257287 | cg24921319 | CYTH3        | 7  | 9.28E-10   | 0.77214876 |
| -0.183778507 | cg07026918 | DAB1         | 1  | 5.62E-05   | 0.4783302  |
| -0.101808141 | cg08465708 | DAB1         | 1  | 1.28E-06   | 0.78100533 |
| -0.206222704 | cg15602972 | DACT3        | 19 | 0.00243815 | 0.68071377 |
| -0.168951819 | cg24754277 | DAPK1        | 9  | 1.58E-05   | 0.43218504 |
| -0.184235051 | cg13752933 | DAPK1        | 9  | 7.21E-10   | 0.48780578 |
| -0.147378693 | cg21244322 | DAPK2        | 15 | 0.02837318 | 0.74545865 |
| -0.151789051 | cg17450733 | DBX2         | 12 | 8.30E-08   | 0.3159356  |
| -0.110690939 | cg18729001 | DBX2         | 12 | 1.90E-07   | 0.48177986 |
| -0.107519612 | cg14943002 | DDB2         | 11 | 4.53E-11   | 0.58364142 |
| -0.112462184 | cg02872426 | DDO;DDO      | 6  | 0.00015878 | 0.49741677 |

|              |            |             |    |            |            |
|--------------|------------|-------------|----|------------|------------|
| -0.138790014 | cg10546888 | DDX17;DDX1  | 22 | 1.09E-06   | 0.61322463 |
| -0.106750645 | cg09375756 | DEAF1       | 11 | 0.00041301 | 0.64306697 |
| -0.105099916 | cg11721464 | DEDD2       | 19 | 0.00530012 | 0.75119185 |
| -0.142616219 | cg14189583 | DEDD2       | 19 | 0.00112372 | 0.62413996 |
| -0.103926251 | cg05254143 | DENND1A     | 9  | 6.01E-11   | 0.752912   |
| -0.126894617 | cg00619207 | DENND2D     | 1  | 1.06E-06   | 0.74340889 |
| -0.119720227 | cg24641737 | DENND2D;DI  | 1  | 5.05E-08   | 0.64721658 |
| -0.114495193 | cg13636371 | DFNB31;DFN  | 9  | 0.0050994  | 0.75200931 |
| -0.120655566 | cg00029246 | DGKI        | 7  | 4.04E-05   | 0.77247503 |
| -0.126742123 | cg10059056 | DGKZ        | 11 | 6.85E-06   | 0.64729953 |
| -0.12754506  | cg03519157 | DGKZ;DGKZ;I | 11 | 1.59E-06   | 0.60055237 |
| -0.112625549 | cg04300065 | DIO3OS      | 14 | 8.65E-05   | 0.41563764 |
| -0.204270288 | cg20065520 | DIO3OS      | 14 | 2.08E-09   | 0.7097849  |
| -0.200622095 | cg04806237 | DIP2C       | 10 | 6.84E-05   | 0.89617516 |
| -0.183215388 | cg13387972 | DIP2C       | 10 | 3.45E-08   | 0.71004693 |
| -0.182467144 | cg10494981 | DIP2C       | 10 | 2.01E-07   | 0.87406479 |
| -0.146488459 | cg04720116 | DIP2C       | 10 | 0.00336225 | 0.70542496 |
| -0.121043255 | cg13775636 | DIP2C       | 10 | 6.07E-05   | 0.73111606 |
| -0.120809427 | cg08079763 | DIP2C       | 10 | 0.0006122  | 0.4729191  |
| -0.15838652  | cg10441401 | DIP2C       | 10 | 7.36E-08   | 0.4820634  |
| -0.135317039 | cg17333886 | DIP2C       | 10 | 1.18E-11   | 0.68302665 |
| -0.125098472 | cg25787984 | DKK3;DKK3;I | 11 | 5.71E-08   | 0.38904731 |
| -0.117451631 | cg16749785 | DLC1;DLC1;D | 8  | 0.00356356 | 0.70690997 |
| -0.12096688  | cg20607577 | DLC1;DLC1;D | 8  | 0.00264607 | 0.63753279 |
| -0.15263632  | cg20733077 | DLEU2       | 13 | 9.39E-06   | 0.69254194 |
| -0.128935208 | cg01404873 | DLEU2       | 13 | 6.28E-07   | 0.69570908 |
| -0.230099331 | cg07422669 | DLGAP2      | 8  | 0.00018576 | 0.70397363 |
| -0.170710701 | cg27351978 | DLGAP2      | 8  | 4.09E-05   | 0.40789448 |
| -0.207190158 | cg09359114 | DLX5        | 7  | 0.00028049 | 0.73640684 |
| -0.142847459 | cg20250426 | DLX5        | 7  | 8.58E-05   | 0.84143798 |
| -0.126476599 | cg00400832 | DLX5        | 7  | 3.87E-05   | 0.69351802 |
| -0.220450464 | cg08101303 | DLX5        | 7  | 6.07E-05   | 0.39297538 |
| -0.11653019  | cg20377305 | DLX5        | 7  | 1.56E-09   | 0.62775042 |
| -0.127255498 | cg00503840 | DLX5        | 7  | 0.00027972 | 0.50669837 |
| -0.108013907 | cg13462129 | DLX5        | 7  | 1.51E-05   | 0.50663199 |
| -0.103890573 | cg13286614 | DLX5        | 7  | 6.95E-07   | 0.83181378 |
| -0.118123924 | cg12041387 | DLX5        | 7  | 0.00034369 | 0.70307476 |
| -0.159733413 | cg15339231 | DLX5        | 7  | 5.89E-07   | 0.44715435 |
| -0.101183415 | cg27016494 | DLX5        | 7  | 0.00276603 | 0.7168885  |
| -0.113781815 | cg18873386 | DLX5        | 7  | 0.00057108 | 0.65718557 |
| -0.177133393 | cg05597836 | DLX5        | 7  | 8.69E-09   | 0.83883059 |
| -0.124204478 | cg08835113 | DLX5        | 7  | 2.70E-06   | 0.63676251 |
| -0.14668238  | cg20080624 | DLX5        | 7  | 0.00013411 | 0.69882119 |
| -0.122552539 | cg15732768 | DLX5        | 7  | 0.00011265 | 0.54180655 |
| -0.113025564 | cg26075150 | DLX6AS      | 7  | 7.30E-05   | 0.89317528 |
| -0.106452547 | cg13019143 | DLX6AS      | 7  | 8.09E-06   | 0.34048971 |

|              |            |               |   |            |            |
|--------------|------------|---------------|---|------------|------------|
| -0.106307196 | cg01759597 | DLX6AS        | 7 | 6.76E-07   | 0.37244509 |
| -0.118920747 | cg20109856 | DLX6AS        | 7 | 6.69E-05   | 0.78831308 |
| -0.16435244  | cg04832767 | DLX6AS        | 7 | 3.29E-06   | 0.28434436 |
| -0.120395438 | cg25930591 | DLX6AS        | 7 | 3.27E-06   | 0.33720865 |
| -0.171827403 | cg00774005 | DLX6AS        | 7 | 0.00092223 | 0.73565698 |
| -0.162336115 | cg25430192 | DLX6AS        | 7 | 5.20E-06   | 0.66716068 |
| -0.130776098 | cg15199678 | DLX6AS        | 7 | 1.83E-06   | 0.34412409 |
| -0.113966795 | cg16961816 | DLX6AS        | 7 | 1.49E-07   | 0.69684233 |
| -0.101073114 | cg25678088 | DLX6AS        | 7 | 3.47E-06   | 0.42502509 |
| -0.119653447 | cg10690003 | DLX6AS        | 7 | 1.03E-06   | 0.71207152 |
| -0.118549449 | cg00337916 | DLX6AS        | 7 | 4.92E-06   | 0.74795045 |
| -0.132523209 | cg26033466 | DLX6AS        | 7 | 0.00016332 | 0.47792659 |
| -0.145604964 | cg04088697 | DLX6AS        | 7 | 5.78E-08   | 0.36562195 |
| -0.134243926 | cg10205928 | DLX6AS        | 7 | 4.48E-07   | 0.49539266 |
| -0.143942961 | cg07788369 | DLX6AS        | 7 | 9.83E-09   | 0.44545497 |
| -0.127909222 | cg18502142 | DLX6AS        | 7 | 2.23E-09   | 0.77948214 |
| -0.107857964 | cg25707676 | DLX6AS        | 7 | 5.26E-06   | 0.58226161 |
| -0.122352851 | cg02530022 | DLX6AS        | 7 | 1.26E-06   | 0.38624863 |
| -0.148053065 | cg11113469 | DLX6AS        | 7 | 1.01E-07   | 0.71603547 |
| -0.203545698 | cg10659805 | DLX6AS        | 7 | 3.99E-10   | 0.76558448 |
| -0.105277528 | cg23767994 | DLX6AS        | 7 | 5.60E-07   | 0.65873878 |
| -0.259463761 | cg26251506 | DLX6AS        | 7 | 9.20E-07   | 0.56374008 |
| -0.132458335 | cg21545390 | DLX6AS        | 7 | 6.39E-07   | 0.4770258  |
| -0.144013159 | cg09803262 | DLX6AS        | 7 | 3.70E-07   | 0.63809713 |
| -0.127723264 | cg19722748 | DLX6AS        | 7 | 2.13E-07   | 0.54868645 |
| -0.205188837 | cg22616881 | DLX6AS        | 7 | 5.71E-07   | 0.56847434 |
| -0.100044141 | cg12055395 | DLX6AS        | 7 | 8.26E-07   | 0.68179199 |
| -0.114191333 | cg26668276 | DLX6AS        | 7 | 1.85E-06   | 0.56154762 |
| -0.116303514 | cg11070059 | DLX6AS        | 7 | 8.76E-08   | 0.5823514  |
| -0.101981122 | cg08598654 | DLX6AS        | 7 | 8.85E-07   | 0.59986243 |
| -0.108689836 | cg13799941 | DLX6AS        | 7 | 2.16E-10   | 0.672978   |
| -0.144305831 | cg16758800 | DLX6AS        | 7 | 1.31E-09   | 0.76746538 |
| -0.12004358  | cg21945930 | DLX6AS        | 7 | 1.15E-06   | 0.67617494 |
| -0.113731814 | cg22505086 | DLX6AS;DLX6AS | 7 | 5.04E-07   | 0.71288554 |
| -0.241429128 | cg08745288 | DLX6AS;DLX6AS | 7 | 0.00173484 | 0.75053572 |
| -0.134178724 | cg16243019 | DLX6AS;DLX6AS | 7 | 1.90E-07   | 0.66474506 |
| -0.175206562 | cg03774463 | DLX6AS;DLX6AS | 7 | 5.63E-09   | 0.69165931 |
| -0.223808795 | cg13946956 | DMRT1         | 9 | 3.16E-06   | 0.67845124 |
| -0.102279026 | cg13863701 | DMRT2;DMR     | 9 | 6.11E-06   | 0.83197231 |
| -0.145242525 | cg00290086 | DMRT2;DMR     | 9 | 2.23E-05   | 0.7297692  |
| -0.129617377 | cg00934355 | DMRT2;DMR     | 9 | 5.11E-13   | 0.55796499 |
| -0.127038244 | cg14067101 | DMRT3         | 9 | 2.37E-05   | 0.41623506 |
| -0.127905715 | cg26489108 | DMRT3         | 9 | 3.45E-05   | 0.46909907 |
| -0.117432819 | cg25507226 | DNAJB6        | 7 | 9.92E-05   | 0.46193374 |
| -0.161762095 | cg10161638 | DNAJB6        | 7 | 3.19E-05   | 0.54396008 |
| -0.223423399 | cg14297444 | DNM1;DNM1     | 9 | 0.00159067 | 0.50210553 |

|              |            |              |    |            |            |
|--------------|------------|--------------|----|------------|------------|
| -0.109623986 | cg17742416 | DNMT3A;DN    | 2  | 2.97E-05   | 0.46417641 |
| -0.105346465 | cg26544247 | DNMT3A;DN    | 2  | 0.00018102 | 0.5447124  |
| -0.119926797 | cg13444670 | DNTT;DNTT    | 10 | 0.00044918 | 0.64343622 |
| -0.212233599 | cg03752935 | DOCK1        | 10 | 0.01028362 | 0.72304412 |
| -0.136688978 | cg26717418 | DOCK1        | 10 | 3.97E-14   | 0.71570912 |
| -0.148879595 | cg00255726 | DOK2         | 8  | 0.00038648 | 0.84638878 |
| -0.132212774 | cg04065210 | DPY19L1      | 7  | 1.52E-09   | 0.57159186 |
| -0.131680365 | cg00576650 | DSCAM        | 21 | 6.74E-08   | 0.80905933 |
| -0.196767835 | cg19869037 | DSE;DSE      | 6  | 0.00027699 | 0.3098363  |
| -0.114599061 | cg05789595 | DST;DST;DST  | 6  | 6.62E-05   | 0.33427177 |
| -0.103763743 | cg07151117 | DUSP4;DUSP   | 8  | 8.94E-05   | 0.74592224 |
| -0.124874743 | cg09172244 | EBF1         | 5  | 6.86E-06   | 0.59995747 |
| -0.199679241 | cg27417526 | EBF3         | 10 | 0.00018407 | 0.74501002 |
| -0.103502286 | cg19074393 | EBF3         | 10 | 3.11E-05   | 0.54052924 |
| -0.170405974 | cg09096787 | EBF3         | 10 | 0.00013403 | 0.44430921 |
| -0.144363059 | cg02584267 | EBF3         | 10 | 8.77E-08   | 0.59283396 |
| -0.236666203 | cg00459904 | EBF3         | 10 | 1.44E-08   | 0.47234555 |
| -0.134829855 | cg24553417 | EBPL         | 13 | 6.02E-07   | 0.81673721 |
| -0.160065098 | cg21221557 | EDIL3        | 5  | 5.63E-05   | 0.77188233 |
| -0.154978227 | cg21875980 | EGLN1        | 1  | 4.48E-09   | 0.62942986 |
| -0.100894987 | cg07202353 | EHD4         | 15 | 0.00202628 | 0.53987096 |
| -0.117421359 | cg10142436 | EHD4         | 15 | 4.85E-08   | 0.33058334 |
| -0.155212443 | cg04614155 | EHD4         | 15 | 3.54E-08   | 0.45285032 |
| -0.108293604 | cg18440839 | EIF2C2;EIF2C | 8  | 2.55E-05   | 0.84742424 |
| -0.124224646 | cg00288598 | EIF2C2;EIF2C | 8  | 0.0015877  | 0.56353483 |
| -0.136649136 | cg09976893 | EIF3H        | 8  | 1.98E-09   | 0.82306017 |
| -0.137848057 | cg21301240 | EIF3H        | 8  | 1.51E-05   | 0.74997168 |
| -0.107489807 | cg26561681 | EIF4G3       | 1  | 0.00070065 | 0.65355381 |
| -0.102459337 | cg18429196 | EIF4H;EIF4H  | 7  | 1.70E-06   | 0.59501623 |
| -0.153997277 | cg13353389 | EIF4H;EIF4H  | 7  | 6.68E-11   | 0.30928033 |
| -0.140743924 | cg07213289 | EIF4H;EIF4H  | 7  | 2.15E-12   | 0.41862255 |
| -0.117732546 | cg08044454 | ELMO1;ELMO   | 7  | 5.14E-05   | 0.60172392 |
| -0.139983194 | cg15552238 | EMR3         | 19 | 2.89E-10   | 0.71744708 |
| -0.160533472 | cg13973985 | EMR3;EMR3    | 19 | 2.37E-05   | 0.72153351 |
| -0.130175202 | cg19925204 | EMX2;EMX2    | 10 | 0.00077028 | 0.50672509 |
| -0.138061604 | cg17320707 | EMX2;EMX2    | 10 | 1.49E-05   | 0.44065817 |
| -0.117116809 | cg16234557 | EMX2OS       | 10 | 0.00013595 | 0.35506797 |
| -0.10176458  | cg17167253 | EN1          | 2  | 1.66E-07   | 0.28248878 |
| -0.122555803 | cg14274989 | EN1          | 2  | 2.66E-08   | 0.27223455 |
| -0.124072293 | cg04034583 | EN1          | 2  | 9.03E-12   | 0.54569345 |
| -0.107002169 | cg03883295 | EN1          | 2  | 1.41E-07   | 0.36948879 |
| -0.101667026 | cg12305200 | EN1          | 2  | 8.28E-11   | 0.31484029 |
| -0.147605641 | cg26990102 | EN1          | 2  | 3.99E-08   | 0.25158359 |
| -0.131374022 | cg01165776 | EN1          | 2  | 2.39E-07   | 0.39593242 |
| -0.155152614 | cg22007486 | EN1          | 2  | 7.85E-08   | 0.4283243  |
| -0.107782595 | cg16794506 | EN1          | 2  | 1.93E-11   | 0.38227718 |

|              |            |             |    |            |            |
|--------------|------------|-------------|----|------------|------------|
| -0.127489624 | cg02739346 | EN1         | 2  | 4.15E-15   | 0.39496782 |
| -0.210495813 | cg15724256 | EN1         | 2  | 9.70E-17   | 0.50091632 |
| -0.220442258 | cg13305444 | ENAH;ENAH   | 1  | 0.00127083 | 0.35190417 |
| -0.154967124 | cg00049892 | ENPP1       | 6  | 5.87E-06   | 0.66158473 |
| -0.108560554 | cg19270309 | ENPP7       | 17 | 5.84E-05   | 0.46013402 |
| -0.40117192  | cg06458086 | EPB41L2;EPB | 6  | 1.61E-08   | 0.49903769 |
| -0.103338642 | cg26392737 | EPB49;EPB49 | 8  | 3.76E-09   | 0.25237869 |
| -0.150095294 | cg16678564 | EPB49;EPB49 | 8  | 8.99E-09   | 0.63844107 |
| -0.143183488 | cg27214730 | EPHB3       | 3  | 9.40E-09   | 0.80039802 |
| -0.13154779  | cg18990407 | EPHB3       | 3  | 1.75E-07   | 0.7321414  |
| -0.109296153 | cg15334250 | EPHB3       | 3  | 2.45E-08   | 0.63473207 |
| -0.114500103 | cg10378735 | EPHB6       | 7  | 9.78E-10   | 0.72328188 |
| -0.218650573 | cg16597993 | EPS15L1     | 19 | 2.10E-05   | 0.39625111 |
| -0.182041302 | cg11414610 | EPS15L1     | 19 | 0.00278588 | 0.61827356 |
| -0.162486975 | cg26435149 | ERC2        | 3  | 5.04E-06   | 0.59406984 |
| -0.122619328 | cg05070265 | ERC2        | 3  | 8.80E-06   | 0.57583893 |
| -0.11370963  | cg18220666 | EREG        | 4  | 2.16E-05   | 0.6974142  |
| -0.112786711 | cg00768179 | ERRFI1      | 1  | 0.0012941  | 0.57222129 |
| -0.102597541 | cg04118119 | ESD         | 13 | 0.00025947 | 0.59279491 |
| -0.176779692 | cg22157087 | ESR1        | 6  | 6.83E-06   | 0.35522222 |
| -0.156048309 | cg09826050 | ESRRG       | 1  | 4.12E-05   | 0.38646851 |
| -0.10597329  | cg05212892 | ESYT2       | 7  | 0.00726971 | 0.53983574 |
| -0.101290115 | cg06390643 | ETV5        | 3  | 0.00076208 | 0.65318419 |
| -0.125239962 | cg18763536 | ETV6        | 12 | 9.95E-07   | 0.5318659  |
| -0.151596753 | cg14830166 | ETV6        | 12 | 7.61E-09   | 0.6327837  |
| -0.149190468 | cg13013841 | EVPLL       | 17 | 0.00015833 | 0.68975925 |
| -0.118503178 | cg09071155 | EVX1        | 7  | 3.39E-05   | 0.41536874 |
| -0.110194204 | cg13942186 | EXD3        | 9  | 2.65E-06   | 0.44415644 |
| -0.117445599 | cg19431495 | EXOC3       | 5  | 2.74E-05   | 0.61986745 |
| -0.217896078 | cg22747380 | EXT1        | 8  | 0.00247457 | 0.45622569 |
| -0.156797671 | cg07551677 | EXTL3       | 8  | 1.23E-06   | 0.85237675 |
| -0.122191661 | cg14866547 | EYA4;EYA4;E | 6  | 3.10E-07   | 0.75661273 |
| -0.10363039  | cg26827458 | FAF2        | 5  | 1.87E-06   | 0.76496606 |
| -0.104711938 | cg12803754 | FAM105B     | 5  | 7.33E-07   | 0.76970273 |
| -0.196811317 | cg06381463 | FAM125B;FA  | 9  | 0.00428247 | 0.67364413 |
| -0.107798813 | cg12463883 | FAM155A     | 13 | 2.97E-08   | 0.28989805 |
| -0.102231349 | cg15683970 | FAM165B     | 21 | 0.00244593 | 0.84609489 |
| -0.109084985 | cg16720807 | FAM176A;FA  | 2  | 1.26E-08   | 0.90230275 |
| -0.104119199 | cg02630819 | FAM178B     | 2  | 8.35E-10   | 0.44461325 |
| -0.100247731 | cg24657419 | FAM184A;FA  | 6  | 2.02E-06   | 0.75271336 |
| -0.132811267 | cg02262221 | FAM190A     | 4  | 2.22E-06   | 0.34653383 |
| -0.100035803 | cg14711869 | FAM193A     | 4  | 9.24E-15   | 0.55586059 |
| -0.101654542 | cg27640234 | FAM20C      | 7  | 1.32E-05   | 0.70196051 |
| -0.107441851 | cg21640865 | FAM20C      | 7  | 7.22E-07   | 0.6493224  |
| -0.173148678 | cg11045746 | FAM26F      | 6  | 0.00547033 | 0.69960018 |
| -0.104529176 | cg15361215 | FAM45B;FAM  | 10 | 2.65E-10   | 0.66635515 |

|              |            |              |    |            |            |
|--------------|------------|--------------|----|------------|------------|
| -0.112912676 | cg07229893 | FAM53A       | 4  | 0.0017201  | 0.72198224 |
| -0.100152434 | cg07765262 | FAM53A       | 4  | 1.42E-07   | 0.74091487 |
| -0.13250593  | cg17936488 | FAM78A       | 9  | 0.00284684 | 0.86601459 |
| -0.112167872 | cg22384356 | FAM83A;FAM   | 8  | 1.47E-12   | 0.65165815 |
| -0.106649729 | cg15425827 | FAM83A;FAM   | 8  | 6.33E-12   | 0.52846486 |
| -0.164642165 | cg15217784 | FAM83B       | 6  | 2.85E-05   | 0.44062952 |
| -0.179724902 | cg06450397 | FAS;FAS;FAS; | 10 | 0.01300023 | 0.68326324 |
| -0.150938074 | cg24298860 | FAT3         | 11 | 9.45E-05   | 0.83973362 |
| -0.107831371 | cg07452842 | FAT3         | 11 | 1.34E-08   | 0.87736094 |
| -0.150404049 | cg20664313 | FBRSL1       | 12 | 3.12E-06   | 0.58443711 |
| -0.130051137 | cg07880971 | FBRSL1       | 12 | 1.31E-07   | 0.35170123 |
| -0.104631409 | cg07050611 | FBXW8;FBXV   | 12 | 0.00010078 | 0.65052255 |
| -0.116592979 | cg24496021 | FCHSD2       | 11 | 1.21E-05   | 0.68596247 |
| -0.12427367  | cg13912027 | FCHSD2       | 11 | 6.34E-05   | 0.55441044 |
| -0.124836962 | cg07206630 | FGF1;FGF1;F  | 5  | 0.00839679 | 0.66487921 |
| -0.141580636 | cg15986555 | FGFR2;FGFR2  | 10 | 4.19E-05   | 0.66680541 |
| -0.17857377  | cg02137691 | FGFR3;FGFR3  | 4  | 0.00058482 | 0.55789971 |
| -0.104110891 | cg08145949 | FGFR3;FGFR3  | 4  | 0.00145196 | 0.5272587  |
| -0.112889441 | cg14988083 | FGFR3;FGFR3  | 4  | 0.02819419 | 0.71440389 |
| -0.102298594 | cg03874978 | FGFR3;FGFR3  | 4  | 0.00014185 | 0.65856229 |
| -0.101407888 | cg14869372 | FGFRL1;FGFF  | 4  | 0.01343406 | 0.65134898 |
| -0.10173932  | cg19586143 | FHOD3        | 18 | 0.00158807 | 0.79571054 |
| -0.128017441 | cg01620164 | FIGN         | 2  | 3.99E-08   | 0.39192225 |
| -0.274478069 | cg13167816 | FITM1        | 14 | 3.76E-11   | 0.83067293 |
| -0.224941254 | cg10327980 | FITM1        | 14 | 5.57E-08   | 0.62392614 |
| -0.185596375 | cg20306574 | FITM1        | 14 | 5.00E-08   | 0.74780701 |
| -0.183957133 | cg03546163 | FKBP5;FKBP5  | 6  | 0.00113394 | 0.77557741 |
| -0.17173876  | cg24859352 | FLJ22536     | 6  | 3.33E-05   | 0.63595314 |
| -0.144956371 | cg15541384 | FLJ22536     | 6  | 0.00070097 | 0.39414822 |
| -0.136347264 | cg00783006 | FLJ41350     | 10 | 3.30E-07   | 0.56010629 |
| -0.130764074 | cg24579887 | FLJ42709;FLJ | 5  | 9.97E-05   | 0.64433832 |
| -0.117706865 | cg06991974 | FLJ42875;FLJ | 1  | 0.01691136 | 0.5723456  |
| -0.114524721 | cg07946633 | FLJ42875;PRI | 1  | 0.00581788 | 0.52722644 |
| -0.108312106 | cg15928106 | FLJ43663;FLJ | 7  | 0.00300209 | 0.73481755 |
| -0.105715176 | cg14761417 | FLJ43663;FLJ | 7  | 3.44E-05   | 0.60139645 |
| -0.155397868 | cg19646759 | FLVCR2       | 14 | 1.21E-13   | 0.83136018 |
| -0.107123429 | cg12495731 | FN3K         | 17 | 0.00400043 | 0.69136153 |
| -0.106034717 | cg04002794 | FNDC3B;FND   | 3  | 0.00051146 | 0.33399668 |
| -0.128645435 | cg11637968 | FNIP2        | 4  | 0.00957827 | 0.65540626 |
| -0.118372467 | cg09562426 | FOLR1;FOLR1  | 11 | 1.32E-05   | 0.61347833 |
| -0.136869362 | cg01243371 | FOXF1        | 16 | 0.00058982 | 0.5480898  |
| -0.110754432 | cg06496454 | FOXK1        | 7  | 1.10E-08   | 0.88380379 |
| -0.129568645 | cg05066096 | FOXK1        | 7  | 5.11E-05   | 0.65310434 |
| -0.108556299 | cg11931953 | FOXK1        | 7  | 1.05E-07   | 0.86391677 |
| -0.114671573 | cg05102770 | FOXK1        | 7  | 4.04E-10   | 0.85837688 |
| -0.100781682 | cg06114605 | FOXK1        | 7  | 1.81E-12   | 0.76829092 |

|              |            |              |    |            |            |
|--------------|------------|--------------|----|------------|------------|
| -0.203120786 | cg25330264 | FOXK1        | 7  | 3.30E-14   | 0.77506872 |
| -0.166968658 | cg01467047 | FOXL1        | 16 | 5.82E-05   | 0.74410235 |
| -0.160844901 | cg06114987 | FOXL1        | 16 | 1.13E-07   | 0.80789901 |
| -0.140094282 | cg25509697 | FOXL2;C3orf  | 3  | 0.00014476 | 0.67526173 |
| -0.126823857 | cg15821562 | FOXN3        | 14 | 7.14E-06   | 0.75960588 |
| -0.141024162 | cg05053979 | FOXN3;FOXN   | 14 | 1.66E-06   | 0.72636557 |
| -0.142068404 | cg18546840 | FOXP2;FOXP   | 7  | 0.00270258 | 0.39647505 |
| -0.148653854 | cg18871253 | FOXP2;FOXP   | 7  | 0.00027455 | 0.41383286 |
| -0.122421377 | cg24786986 | FOXP2;FOXP   | 7  | 1.14E-06   | 0.48036386 |
| -0.119806151 | cg17631429 | FOXS1        | 20 | 0.00510996 | 0.79700941 |
| -0.100480981 | cg06447378 | FREM2        | 13 | 1.71E-05   | 0.74834234 |
| -0.158579062 | cg05859842 | FRMPD2;FRM   | 10 | 1.43E-12   | 0.61041847 |
| -0.147611649 | cg19348484 | FURIN        | 15 | 0.00857697 | 0.56315709 |
| -0.12769392  | cg05374956 | FUT6;FUT6;F  | 19 | 1.06E-07   | 0.76510499 |
| -0.122661184 | cg12036924 | FUT6;FUT6;F  | 19 | 1.04E-08   | 0.71983032 |
| -0.12182309  | cg16701258 | FUT6;FUT6;F  | 19 | 1.28E-13   | 0.58655744 |
| -0.115259522 | cg01913259 | GABRA5;GAE   | 15 | 3.15E-05   | 0.56356514 |
| -0.104970713 | cg00408567 | GALNT10;GA   | 5  | 1.04E-05   | 0.41336736 |
| -0.116264441 | cg00772774 | GALNT9       | 12 | 2.09E-08   | 0.46451281 |
| -0.174102217 | cg21790587 | GALNT9       | 12 | 7.16E-12   | 0.66731059 |
| -0.165969336 | cg10016608 | GAS2L2       | 17 | 5.10E-10   | 0.40671744 |
| -0.157114728 | cg12229387 | GAST         | 17 | 0.00122947 | 0.50809678 |
| -0.150801909 | cg07195926 | GATA2;GATA   | 3  | 8.87E-05   | 0.73514021 |
| -0.13108191  | cg01102073 | GATA2;GATA   | 3  | 0.00022457 | 0.5828944  |
| -0.124853539 | cg06796779 | GATA2;GATA   | 3  | 7.83E-07   | 0.66275118 |
| -0.11730334  | cg07263393 | GATA2;GATA   | 3  | 0.00025073 | 0.49288096 |
| -0.125491356 | cg04492228 | GATA3;GATA   | 10 | 8.11E-07   | 0.34444592 |
| -0.326252759 | cg10163955 | GATA3;GATA   | 10 | 1.13E-07   | 0.81744425 |
| -0.296005282 | cg10089865 | GATA3;GATA   | 10 | 4.90E-06   | 0.78880914 |
| -0.268823636 | cg03669298 | GATA3;GATA   | 10 | 4.94E-09   | 0.46765057 |
| -0.264750002 | cg22892607 | GATA3;GATA   | 10 | 8.40E-07   | 0.47984706 |
| -0.26302357  | cg03935183 | GATA3;GATA   | 10 | 9.33E-07   | 0.82282032 |
| -0.256264939 | cg17830204 | GATS;GATS;C  | 7  | 6.48E-11   | 0.84396243 |
| -0.243039472 | cg06510261 | GCET2;GCET   | 3  | 1.90E-07   | 0.31231817 |
| -0.240416161 | cg25462303 | GCET2;GCET   | 3  | 2.82E-11   | 0.62411568 |
| -0.222065804 | cg08062713 | GDF5         | 20 | 4.94E-05   | 0.85094382 |
| -0.219676432 | cg27141850 | GDF7         | 2  | 0.00023713 | 0.78137695 |
| -0.20356702  | cg09169739 | GFPT2        | 5  | 3.13E-08   | 0.63391333 |
| -0.201179925 | cg26338723 | GFRA1;GFRA   | 10 | 1.76E-07   | 0.61737563 |
| -0.194745743 | cg22123459 | GGT1;GGT1;(  | 22 | 3.61E-08   | 0.43583421 |
| -0.191826941 | cg07223253 | GIMAP8;GIM   | 7  | 1.18E-05   | 0.51003269 |
| -0.17439178  | cg17337670 | GIT2;GIT2;GI | 12 | 1.14E-07   | 0.73954748 |
| -0.17438594  | cg02774705 | GLI2         | 2  | 0.0001387  | 0.70723587 |
| -0.170244244 | cg00842259 | GLI3         | 7  | 0.0002081  | 0.60832328 |
| -0.163429696 | cg11306767 | GLRX;GLRX    | 5  | 2.45E-05   | 0.51732244 |
| -0.151889807 | cg16762849 | GMDS         | 6  | 0.00205249 | 0.50900748 |

|              |            |             |    |            |            |
|--------------|------------|-------------|----|------------|------------|
| -0.144624422 | cg05308829 | GNA12       | 7  | 2.19E-06   | 0.8354668  |
| -0.139522315 | cg12444411 | GNA12       | 7  | 0.00427171 | 0.48024147 |
| -0.132962304 | cg01492538 | GNA12       | 7  | 1.05E-10   | 0.44076218 |
| -0.123015648 | cg23285459 | GNA12       | 7  | 0.00182452 | 0.47985389 |
| -0.119372896 | cg11967765 | GNA12       | 7  | 0.00044704 | 0.76659561 |
| -0.113598748 | cg21143896 | GNA12       | 7  | 0.00631045 | 0.55953938 |
| -0.108306295 | cg26912314 | GNAO1;GNA   | 16 | 8.76E-05   | 0.41454348 |
| -0.101970843 | cg01286319 | GNG7        | 19 | 6.07E-05   | 0.59301571 |
| -0.296985109 | cg16078863 | GOLGA3      | 12 | 0.00732582 | 0.33928366 |
| -0.281481895 | cg06804344 | GP9         | 3  | 2.20E-05   | 0.63039412 |
| -0.27794778  | cg00545232 | GPC6        | 13 | 0.00015363 | 0.41809431 |
| -0.175530745 | cg15318697 | GPD1L       | 3  | 0.0012501  | 0.51817291 |
| -0.213065753 | cg06976482 | GPR123      | 10 | 1.19E-05   | 0.4348879  |
| -0.129901854 | cg03906820 | GPR123      | 10 | 1.03E-10   | 0.75635569 |
| -0.314613858 | cg01109135 | GPR132      | 14 | 1.28E-09   | 0.45809147 |
| -0.19027825  | cg05361273 | GPR17;LIMS2 | 2  | 2.42E-08   | 0.47542133 |
| -0.24472747  | cg17095652 | GPR176      | 15 | 4.93E-05   | 0.49820202 |
| -0.154185555 | cg20814312 | GPR39       | 2  | 1.06E-06   | 0.42181069 |
| -0.104271326 | cg06543615 | GPR39;LYPD1 | 2  | 2.23E-08   | 0.49937513 |
| -0.132280238 | cg00519299 | GPR44       | 11 | 9.91E-05   | 0.50086393 |
| -0.121564262 | cg13077745 | GPR44       | 11 | 3.61E-10   | 0.46859372 |
| -0.114597434 | cg26643476 | GPR81       | 12 | 6.87E-05   | 0.42278047 |
| -0.103622733 | cg14555265 | GPSM1;GPSM  | 9  | 5.82E-11   | 0.80118347 |
| -0.100764006 | cg13247967 | GRAMD1B     | 11 | 4.93E-05   | 0.65636259 |
| -0.173208555 | cg13333800 | GRAMD3      | 5  | 0.00086837 | 0.55427881 |
| -0.129868866 | cg07316730 | GRB2;GRB2   | 17 | 3.03E-10   | 0.55181771 |
| -0.117753513 | cg21273275 | GRHL3;GRHL  | 1  | 1.08E-05   | 0.44127922 |
| -0.111111941 | cg02063520 | GRIK2;GRIK2 | 6  | 2.06E-05   | 0.4544632  |
| -0.112342104 | cg05666036 | GRIK2;GRIK2 | 6  | 1.81E-05   | 0.45102523 |
| -0.176261412 | cg10961484 | GRIK4       | 11 | 3.25E-05   | 0.73132035 |
| -0.129414727 | cg04740679 | GRTP1       | 13 | 0.0026261  | 0.74655009 |
| -0.115190229 | cg05279772 | GRXCR1      | 4  | 8.42E-09   | 0.84043745 |
| -0.103188928 | cg06866686 | GSC         | 14 | 1.10E-09   | 0.24974464 |
| -0.101101495 | cg18687675 | GSC         | 14 | 4.28E-09   | 0.32336616 |
| -0.118048739 | cg10771489 | GSC         | 14 | 6.98E-13   | 0.25311844 |
| -0.106985681 | cg23695707 | GSC         | 14 | 4.80E-09   | 0.28414262 |
| -0.123415396 | cg13073773 | GSC         | 14 | 2.11E-12   | 0.59777959 |
| -0.166704699 | cg15440688 | GSC         | 14 | 2.44E-15   | 0.75145518 |
| -0.171537473 | cg01695643 | GSC         | 14 | 1.86E-20   | 0.87314894 |
| -0.111024866 | cg23074992 | GSC         | 14 | 4.25E-20   | 0.83492588 |
| -0.121367114 | cg27372015 | GTF3C1      | 16 | 0.00086727 | 0.43093534 |
| -0.100276706 | cg20911180 | GUCY2E      | 11 | 0.00321164 | 0.75204483 |
| -0.11524673  | cg19202813 | GULP1       | 2  | 0.00183322 | 0.65516927 |
| -0.115514325 | cg13431800 | GXYLT1;GXYL | 12 | 2.85E-12   | 0.46556031 |
| -0.11121377  | cg22491680 | HAL         | 12 | 7.82E-05   | 0.89004101 |
| -0.153105354 | cg24974365 | HAND2       | 4  | 1.26E-08   | 0.27175018 |



|              |            |             |    |            |            |
|--------------|------------|-------------|----|------------|------------|
| -0.106128599 | cg05155840 | HAND2       | 4  | 9.69E-10   | 0.32291202 |
| -0.108030174 | cg08297751 | HAND2       | 4  | 1.04E-15   | 0.57905791 |
| -0.233456849 | cg10933003 | HAND2       | 4  | 6.01E-10   | 0.54494831 |
| -0.153843415 | cg01967399 | HAND2       | 4  | 2.08E-17   | 0.73978654 |
| -0.12227691  | cg27218796 | HAND2       | 4  | 8.35E-16   | 0.74498271 |
| -0.108210152 | cg01566965 | HAND2       | 4  | 2.97E-18   | 0.75615046 |
| -0.107705562 | cg22006672 | HAPLN1      | 5  | 6.76E-09   | 0.71500447 |
| -0.251634343 | cg21915449 | HAVCR1;HAV  | 5  | 4.59E-12   | 0.58696683 |
| -0.125606154 | cg26892308 | HCCA2       | 11 | 1.32E-07   | 0.59696029 |
| -0.16002859  | cg22979615 | HCCA2       | 11 | 6.97E-08   | 0.76517278 |
| -0.138911842 | cg07635249 | HCCA2       | 11 | 9.54E-09   | 0.49741519 |
| -0.124802237 | cg24803059 | HCCA2       | 11 | 2.91E-10   | 0.83945159 |
| -0.110093246 | cg25050723 | HCCA2;CTSD  | 11 | 0.00048408 | 0.51494494 |
| -0.107890264 | cg02167021 | HCLS1       | 3  | 1.83E-07   | 0.42155695 |
| -0.164257067 | cg06577710 | HCLS1;HCLS1 | 3  | 7.76E-06   | 0.6269189  |
| -0.1099133   | cg14979674 | HCN1        | 5  | 1.87E-05   | 0.68340776 |
| -0.102989146 | cg16348668 | HDAC4       | 2  | 0.04028714 | 0.57313178 |
| -0.183354469 | cg24360993 | HDC         | 15 | 3.50E-06   | 0.6267046  |
| -0.102403438 | cg18008247 | HEG1        | 3  | 1.74E-07   | 0.74491919 |
| -0.111724627 | cg03440673 | HEG1        | 3  | 1.93E-08   | 0.38282182 |
| -0.146973809 | cg20695534 | HHAT;HHAT;  | 1  | 6.81E-06   | 0.50746734 |
| -0.116998634 | cg16395183 | HHAT;HHAT;  | 1  | 7.26E-09   | 0.42274816 |
| -0.107241683 | cg07616394 | HHEX        | 10 | 4.40E-05   | 0.34686609 |
| -0.157547905 | cg14689537 | HHEX        | 10 | 7.66E-05   | 0.52586424 |
| -0.186372979 | cg24787755 | HHEX        | 10 | 0.00030349 | 0.71098691 |
| -0.227060899 | cg16272084 | HIP1        | 7  | 3.77E-07   | 0.60053084 |
| -0.138352062 | cg17738521 | HIVEP2      | 6  | 0.00046541 | 0.66086094 |
| -0.11909953  | cg13423554 | HIVEP3;HIVE | 1  | 0.00113711 | 0.40085343 |
| -0.107477952 | cg17098103 | HIVEP3;HIVE | 1  | 1.05E-12   | 0.50257799 |
| -0.137967058 | cg23427945 | HLA-B       | 6  | 0.01069922 | 0.69957561 |
| -0.119132069 | cg05525374 | HLA-DMB     | 6  | 0.00580361 | 0.63696326 |
| -0.211549008 | cg07623567 | HLA-DMB     | 6  | 2.20E-08   | 0.63964048 |
| -0.131528256 | cg22797644 | HMGA1;HMC   | 6  | 5.26E-05   | 0.74384605 |
| -0.161103456 | cg24895871 | HOTAIR      | 12 | 0.00753861 | 0.73473343 |
| -0.172829872 | cg02371798 | HOTAIR      | 12 | 3.86E-08   | 0.38583662 |
| -0.129204611 | cg06850442 | HOTAIR      | 12 | 6.96E-13   | 0.39529421 |
| -0.104153534 | cg12121660 | HOXB2       | 17 | 6.09E-10   | 0.31800085 |
| -0.128893614 | cg16898193 | HOXC10      | 12 | 2.03E-10   | 0.25640028 |
| -0.133569622 | cg16295056 | HOXC10      | 12 | 2.71E-07   | 0.38764657 |
| -0.143867332 | cg20403938 | HOXC10      | 12 | 6.22E-16   | 0.54285266 |
| -0.169601468 | cg06708937 | HOXC11      | 12 | 2.23E-09   | 0.45901193 |
| -0.152244946 | cg07697238 | HOXC11      | 12 | 1.64E-10   | 0.47441247 |
| -0.100148654 | cg08857479 | HOXC11      | 12 | 5.32E-08   | 0.58832719 |
| -0.116553749 | cg18054172 | HOXC4;HOXC  | 12 | 3.45E-10   | 0.68823247 |
| -0.174432163 | cg00040312 | HOXC4;HOXC  | 12 | 1.69E-09   | 0.76830157 |
| -0.150052722 | cg10005224 | HOXC4;HOXC  | 12 | 4.10E-06   | 0.45514679 |

|              |            |            |    |            |            |
|--------------|------------|------------|----|------------|------------|
| -0.103446917 | cg18843682 | HOXC4;HOXC | 12 | 7.29E-07   | 0.52452775 |
| -0.240837357 | cg21041775 | HOXC4;HOXC | 12 | 5.05E-11   | 0.63867649 |
| -0.108038737 | cg03305955 | HOXC4;HOXC | 12 | 1.77E-08   | 0.79537261 |
| -0.104831363 | cg15772924 | HOXC4;HOXC | 12 | 6.84E-08   | 0.26958651 |
| -0.112178917 | cg00567703 | HOXC4;HOXC | 12 | 1.25E-14   | 0.53271499 |
| -0.106329272 | cg19164987 | HOXC4;HOXC | 12 | 8.05E-15   | 0.49996146 |
| -0.106219478 | cg11941633 | HOXC4;HOXC | 12 | 3.65E-11   | 0.42028641 |
| -0.179816781 | cg03892356 | HOXC4;HOXC | 12 | 1.13E-06   | 0.84369183 |
| -0.180731078 | cg07545037 | HOXC4;HOXC | 12 | 2.78E-09   | 0.91120111 |
| -0.102649442 | cg23697546 | HOXC4;HOXC | 12 | 1.24E-09   | 0.35351954 |
| -0.106364686 | cg00506343 | HOXC4;HOXC | 12 | 4.07E-12   | 0.3881606  |
| -0.116401806 | cg21582112 | HOXC4;HOXC | 12 | 4.60E-08   | 0.61479424 |
| -0.151130433 | cg22378817 | HOXC4;HOXC | 12 | 1.36E-09   | 0.34735277 |
| -0.12812976  | cg13826247 | HOXC4;HOXC | 12 | 6.13E-12   | 0.67900268 |
| -0.104149919 | cg12905836 | HOXC4;HOXC | 12 | 0.00025594 | 0.79262822 |
| -0.184206039 | cg22621272 | HOXC4;HOXC | 12 | 0.00011866 | 0.78578652 |
| -0.159574168 | cg01473837 | HOXC4;HOXC | 12 | 2.83E-09   | 0.38944939 |
| -0.22131143  | cg13726459 | HOXC4;HOXC | 12 | 2.32E-09   | 0.43216996 |
| -0.145014704 | cg04704531 | HOXC4;HOXC | 12 | 9.51E-11   | 0.79667269 |
| -0.111817801 | cg06714180 | HOXC4;HOXC | 12 | 3.05E-14   | 0.52867077 |
| -0.110249302 | cg15817960 | HOXC4;HOXC | 12 | 6.17E-10   | 0.59121259 |
| -0.156871997 | cg16937769 | HOXC4;HOXC | 12 | 5.00E-14   | 0.75319156 |
| -0.121822804 | cg23618344 | HOXC4;HOXC | 12 | 6.85E-11   | 0.46171667 |
| -0.110624361 | cg07687119 | HOXC4;HOXC | 12 | 6.77E-13   | 0.73236836 |
| -0.101574489 | cg03255182 | HOXC4;HOXC | 12 | 4.68E-13   | 0.75468653 |
| -0.173312353 | cg13545297 | HOXC8      | 12 | 4.22E-11   | 0.86375966 |
| -0.105667418 | cg14301713 | HOXC8      | 12 | 2.39E-07   | 0.39440629 |
| -0.144132995 | cg22660542 | HOXC8      | 12 | 3.83E-07   | 0.76786667 |
| -0.12809888  | cg02344911 | HOXC8      | 12 | 3.86E-14   | 0.33734142 |
| -0.10794559  | cg16908257 | HOXC8      | 12 | 2.35E-14   | 0.7737358  |
| -0.167546676 | cg23685155 | HOXC9      | 12 | 1.47E-09   | 0.38975487 |
| -0.123277286 | cg15819717 | HOXC9      | 12 | 3.46E-10   | 0.48485923 |
| -0.27013183  | cg22679316 | HOXC9      | 12 | 2.72E-17   | 0.84484923 |
| -0.191393    | cg02227188 | HOXC9      | 12 | 4.54E-15   | 0.60138612 |
| -0.107255099 | cg03553278 | HOXD1      | 2  | 2.10E-12   | 0.53459548 |
| -0.150032154 | cg08992581 | HOXD10     | 2  | 2.09E-09   | 0.40153526 |
| -0.111766915 | cg10393811 | HOXD10     | 2  | 2.17E-06   | 0.59279379 |
| -0.14447779  | cg06005169 | HOXD10     | 2  | 2.55E-06   | 0.66444272 |
| -0.137800051 | cg07566169 | HOXD11     | 2  | 3.22E-07   | 0.4033019  |
| -0.113394295 | cg22455694 | HOXD11     | 2  | 3.42E-12   | 0.31853614 |
| -0.126948444 | cg01708273 | HOXD11     | 2  | 2.07E-14   | 0.58639657 |
| -0.120388528 | cg20605061 | HOXD11     | 2  | 1.29E-11   | 0.47389606 |
| -0.109514381 | cg01405040 | HOXD12     | 2  | 3.39E-08   | 0.26489912 |
| -0.182259867 | cg05864326 | HOXD3      | 2  | 3.60E-07   | 0.28550428 |
| -0.118582704 | cg15812753 | HOXD3      | 2  | 2.45E-11   | 0.38154369 |
| -0.100636446 | cg00586420 | HOXD3      | 2  | 7.24E-07   | 0.83659688 |

|              |            |              |    |            |            |
|--------------|------------|--------------|----|------------|------------|
| -0.104803093 | cg12634591 | HOXD3        | 2  | 2.36E-10   | 0.29168016 |
| -0.118105314 | cg02773086 | HOXD3        | 2  | 2.46E-07   | 0.31720197 |
| -0.109523824 | cg13316854 | HOXD3        | 2  | 7.53E-12   | 0.43365641 |
| -0.117795018 | cg05021643 | HOXD3        | 2  | 2.63E-13   | 0.37003931 |
| -0.400597633 | cg04316624 | HOXD3        | 2  | 2.20E-10   | 0.4468909  |
| -0.364683277 | cg24541426 | HOXD3        | 2  | 8.41E-15   | 0.55593477 |
| -0.355403866 | cg06145336 | HOXD3        | 2  | 3.03E-09   | 0.51590607 |
| -0.320406916 | cg10159630 | HOXD3        | 2  | 8.67E-13   | 0.78016107 |
| -0.245168857 | cg01128482 | HOXD3        | 2  | 2.38E-15   | 0.7727987  |
| -0.218293368 | cg09387749 | HOXD3        | 2  | 9.82E-14   | 0.75861343 |
| -0.166314789 | cg13053653 | HOXD3        | 2  | 2.91E-15   | 0.81467836 |
| -0.16451643  | cg23981871 | HOXD3        | 2  | 1.36E-15   | 0.81078122 |
| -0.145803077 | cg00005847 | HOXD3        | 2  | 2.06E-14   | 0.68423998 |
| -0.142814919 | cg00278547 | HOXD3        | 2  | 1.31E-13   | 0.77071309 |
| -0.131876563 | cg10304824 | HOXD3;HOXI   | 2  | 3.94E-13   | 0.87225736 |
| -0.1167356   | cg18750960 | HOXD4        | 2  | 7.80E-06   | 0.40284236 |
| -0.114985521 | cg25951210 | HOXD4        | 2  | 1.88E-09   | 0.77262927 |
| -0.112229011 | cg19509393 | HOXD4        | 2  | 3.65E-10   | 0.72776184 |
| -0.101942377 | cg04843067 | HOXD4        | 2  | 1.27E-06   | 0.75085721 |
| -0.101158464 | cg21011616 | HOXD4        | 2  | 6.03E-12   | 0.65004808 |
| -0.100318877 | cg25304107 | HOXD4        | 2  | 4.80E-09   | 0.82092051 |
| -0.14296196  | cg10803577 | HOXD4        | 2  | 2.88E-11   | 0.78762835 |
| -0.133992199 | cg12539415 | HOXD4;HOXI   | 2  | 1.74E-09   | 0.85790902 |
| -0.127782092 | cg17104824 | HOXD4;MIR1   | 2  | 4.80E-08   | 0.91536197 |
| -0.111603925 | cg08717880 | HOXD4;MIR1   | 2  | 3.27E-08   | 0.88852766 |
| -0.131532384 | cg00014998 | HOXD4;MIR1   | 2  | 9.38E-08   | 0.85719386 |
| -0.10434692  | cg12127282 | HOXD4;MIR1   | 2  | 1.01E-10   | 0.87306279 |
| -0.120886163 | cg00767581 | HOXD4;MIR1   | 2  | 1.07E-07   | 0.77824196 |
| -0.110547556 | cg01152019 | HOXD4;MIR1   | 2  | 6.67E-10   | 0.6795046  |
| -0.167721647 | cg23068499 | HOXD9        | 2  | 0.00012291 | 0.38013689 |
| -0.101016841 | cg00036110 | HPCAL4       | 1  | 4.98E-07   | 0.52020777 |
| -0.116107702 | cg11702866 | HRH1;HRH1;   | 3  | 0.00164189 | 0.460418   |
| -0.11391623  | cg24366429 | HRNBP3       | 17 | 8.31E-14   | 0.48535564 |
| -0.134744873 | cg17077641 | HS3ST3A1     | 17 | 1.64E-12   | 0.86083661 |
| -0.13066553  | cg02400773 | HS3ST3A1     | 17 | 3.98E-05   | 0.79448675 |
| -0.205385506 | cg20928777 | HS3ST3B1     | 17 | 9.67E-08   | 0.36536238 |
| -0.181694864 | cg20731875 | HS3ST3B1;M   | 17 | 0.00248078 | 0.47529055 |
| -0.17022999  | cg24895178 | HS3ST3B1;M   | 17 | 3.73E-08   | 0.8132817  |
| -0.173008607 | cg11119340 | HS6ST3       | 13 | 0.00010772 | 0.6877031  |
| -0.173634616 | cg01559300 | HSD11B1L;H'  | 19 | 5.01E-06   | 0.73621951 |
| -0.159873847 | cg14356530 | HSD17B3      | 9  | 1.03E-06   | 0.50268183 |
| -0.111030183 | cg00543840 | HSPG2        | 1  | 0.00039225 | 0.81213971 |
| -0.10095183  | cg20022118 | ICA1;ICA1;IC | 7  | 3.86E-06   | 0.62564876 |
| -0.24706862  | cg10262052 | IDO1         | 8  | 8.44E-06   | 0.21381037 |
| -0.176316043 | cg27176729 | IER5         | 1  | 8.93E-05   | 0.68020139 |
| -0.133599363 | cg10231067 | IFFO2        | 1  | 0.00011453 | 0.67687696 |

|              |            |               |    |            |            |
|--------------|------------|---------------|----|------------|------------|
| -0.249953708 | cg11186344 | IFFO2         | 1  | 2.72E-11   | 0.472127   |
| -0.206223391 | cg26550235 | IFFO2         | 1  | 0.00042741 | 0.37811047 |
| -0.184733712 | cg03065308 | IFNGR1        | 6  | 0.00012842 | 0.48399678 |
| -0.162280491 | cg02102832 | IFT140        | 16 | 0.00158606 | 0.74941909 |
| -0.120039316 | cg00939684 | IFT140;TMEN   | 16 | 8.41E-05   | 0.73004856 |
| -0.10018587  | cg07013955 | IFT140;TMEN   | 16 | 8.56E-08   | 0.62591729 |
| -0.187775117 | cg08006309 | IFT140;TMEN   | 16 | 2.73E-06   | 0.76362385 |
| -0.150833599 | cg07994487 | IFT140;TMEN   | 16 | 2.10E-12   | 0.83383651 |
| -0.114872826 | cg08182270 | IGDCC4        | 15 | 0.00065665 | 0.68114231 |
| -0.189388773 | cg26577252 | IGF1R         | 15 | 0.03264322 | 0.59953477 |
| -0.103784743 | cg08729686 | IGF1R         | 15 | 5.69E-05   | 0.64307525 |
| -0.130018279 | cg08778287 | IGF1R         | 15 | 1.51E-07   | 0.85311535 |
| -0.282788407 | cg02350767 | IGF1R         | 15 | 1.43E-09   | 0.86167449 |
| -0.234306786 | cg05103581 | IGF1R         | 15 | 4.19E-07   | 0.73261528 |
| -0.174642395 | cg03240301 | IGF2BP3       | 7  | 0.00282796 | 0.69043303 |
| -0.125796096 | cg10494770 | IGLL1;IGLL1;I | 22 | 4.39E-07   | 0.68637224 |
| -0.171210959 | cg13088568 | IHH           | 2  | 4.02E-07   | 0.56851394 |
| -0.165241585 | cg00489539 | IKZF1         | 7  | 2.00E-06   | 0.71233455 |
| -0.129338835 | cg10978799 | IL10          | 1  | 1.82E-05   | 0.68699644 |
| -0.112108405 | cg03876697 | IL17B         | 5  | 3.73E-09   | 0.60641109 |
| -0.127966691 | cg16324121 | IL17RE;IL17R  | 3  | 0.00135877 | 0.71530319 |
| -0.123823755 | cg13897122 | IL18RAP       | 2  | 7.77E-06   | 0.50152606 |
| -0.117808406 | cg00810939 | IL22RA1       | 1  | 1.26E-16   | 0.74975236 |
| -0.101657734 | cg10805880 | IL4I1;IL4I1   | 19 | 0.00240219 | 0.47109484 |
| -0.103901109 | cg11555067 | INPP4A;INPP   | 2  | 1.59E-06   | 0.75036863 |
| -0.113690884 | cg16469046 | INPP4A;INPP   | 2  | 8.70E-07   | 0.56995985 |
| -0.21580299  | cg01169610 | INPP4A;INPP   | 2  | 2.60E-12   | 0.74102611 |
| -0.125781659 | cg24608475 | INPP5A        | 10 | 2.17E-08   | 0.70747538 |
| -0.13538173  | cg01140244 | INPP5A        | 10 | 5.34E-09   | 0.41659128 |
| -0.135452908 | cg12507869 | INPP5A        | 10 | 3.50E-06   | 0.57638477 |
| -0.122833901 | cg00862314 | INPP5A        | 10 | 0.00845551 | 0.59642263 |
| -0.120430703 | cg26193427 | INPP5A        | 10 | 3.27E-08   | 0.59597968 |
| -0.162727176 | cg14953730 | INPP5A        | 10 | 9.32E-08   | 0.53681633 |
| -0.103021875 | cg06272010 | INPP5D;INPP   | 2  | 0.0023371  | 0.54910071 |
| -0.107093851 | cg16321975 | INPP5D;INPP   | 2  | 0.00173309 | 0.62162648 |
| -0.115359556 | cg13577194 | IPPK          | 9  | 5.94E-05   | 0.68047562 |
| -0.139076497 | cg16686273 | IQCE;IQCE     | 7  | 5.62E-05   | 0.50572926 |
| -0.135509332 | cg18527651 | IRAK2         | 3  | 0.00095204 | 0.76878584 |
| -0.10637882  | cg01183510 | IRAK3;IRAK3   | 12 | 1.36E-05   | 0.56647496 |
| -0.106140496 | cg26266708 | ISL2          | 15 | 0.01701391 | 0.65317377 |
| -0.100911699 | cg25789916 | ISLR2;ISLR2;I | 15 | 0.00024617 | 0.5256696  |
| -0.10923757  | cg05036937 | ITGA2         | 5  | 0.00392993 | 0.62369763 |
| -0.11668754  | cg08446038 | ITGA2         | 5  | 0.00018519 | 0.52179509 |
| -0.134623442 | cg01167274 | ITGB2;ITGB2   | 21 | 1.66E-08   | 0.47184151 |
| -0.103535271 | cg07274406 | ITGB2;ITGB2   | 21 | 6.33E-08   | 0.65998075 |
| -0.105028387 | cg07464094 | ITI1H3        | 3  | 2.50E-10   | 0.6265847  |

|              |            |                   |    |            |            |
|--------------|------------|-------------------|----|------------|------------|
| -0.276657006 | cg08972954 | ITK               | 5  | 0.00077186 | 0.6063417  |
| -0.110544152 | cg18665334 | ITM2C;ITM2C       | 2  | 0.00032604 | 0.63518268 |
| -0.103495037 | cg21097788 | ITPK1;ITPK1;ITPK1 | 14 | 0.00060503 | 0.40574482 |
| -0.132389047 | cg25287071 | ITPKB             | 1  | 3.98E-11   | 0.73209568 |
| -0.112912151 | cg05139187 | ITSN2;ITSN2;      | 2  | 3.86E-08   | 0.49162507 |
| -0.102891143 | cg26005086 | JAG1              | 20 | 2.85E-06   | 0.58279617 |
| -0.200394041 | cg22945413 | JAK1              | 1  | 0.00011913 | 0.32072708 |
| -0.16361693  | cg26128456 | JAKMIP1;JAK       | 4  | 1.49E-09   | 0.73456469 |
| -0.268868361 | cg17052756 | JAZF1             | 7  | 7.61E-07   | 0.718889   |
| -0.102028179 | cg21919820 | JAZF1             | 7  | 8.60E-05   | 0.58175415 |
| -0.101120329 | cg23657393 | JPH2              | 20 | 1.18E-10   | 0.61893454 |
| -0.147591533 | cg23440058 | KALRN;KALRI       | 3  | 6.07E-06   | 0.58560727 |
| -0.140813155 | cg15731035 | KCNAB2;KCN        | 1  | 1.38E-11   | 0.75578426 |
| -0.117816459 | cg15510325 | KCNH2;KCNH        | 7  | 4.44E-11   | 0.84772638 |
| -0.104629935 | cg11005943 | KCNJ12            | 17 | 5.02E-05   | 0.71374454 |
| -0.109306139 | cg25508319 | KCNJ5             | 11 | 0.01406669 | 0.7385864  |
| -0.121765784 | cg19427642 | KCNMA1;KCN        | 10 | 0.000447   | 0.59882223 |
| -0.134237957 | cg18315680 | KCNN3;KCNN        | 1  | 8.14E-05   | 0.58799279 |
| -0.180582453 | cg02258534 | KCNQ1;KCNQ        | 11 | 0.00046836 | 0.82862152 |
| -0.139348427 | cg23531340 | KCNS3             | 2  | 0.00012842 | 0.46367629 |
| -0.155313776 | cg06844968 | KCTD1             | 18 | 5.84E-06   | 0.73634191 |
| -0.131333986 | cg10646179 | KCTD16            | 5  | 1.83E-16   | 0.65261428 |
| -0.139704679 | cg26780042 | KDELR2;KDEI       | 7  | 0.00068617 | 0.38143973 |
| -0.132770321 | cg10958452 | KDM4A             | 1  | 0.00963519 | 0.7819157  |
| -0.212496712 | cg17416338 | KDM4B             | 19 | 0.03006659 | 0.67060025 |
| -0.106527762 | cg15705062 | KDM4B             | 19 | 2.05E-08   | 0.84974932 |
| -0.104056463 | cg15621731 | KDM4B             | 19 | 0.00016705 | 0.87272016 |
| -0.13116737  | cg05441854 | KIAA0182;KIA      | 16 | 3.24E-09   | 0.54321255 |
| -0.110717884 | cg26723054 | KIAA0182;KIA      | 16 | 3.55E-13   | 0.79942108 |
| -0.163516394 | cg10482057 | KIAA0319;KIA      | 6  | 0.01187047 | 0.40664136 |
| -0.115762748 | cg05105330 | KIAA0513          | 16 | 3.45E-10   | 0.74803335 |
| -0.119970507 | cg07005506 | KIAA0513          | 16 | 2.70E-08   | 0.5797464  |
| -0.107784994 | cg27260684 | KIAA0513          | 16 | 3.89E-10   | 0.79652792 |
| -0.113304788 | cg11964773 | KIAA1026;KIA      | 1  | 0.00021994 | 0.70291533 |
| -0.104258842 | cg16985952 | KIAA1026;KIA      | 1  | 7.15E-07   | 0.77386484 |
| -0.136934766 | cg15733729 | KIAA1026;KIA      | 1  | 2.74E-05   | 0.72900242 |
| -0.102012721 | cg01017257 | KIAA1026;KIA      | 1  | 6.31E-07   | 0.6942725  |
| -0.132735907 | cg24350475 | KIAA1462          | 10 | 0.00025378 | 0.41268241 |
| -0.11283142  | cg12786570 | KIAA1462          | 10 | 2.45E-11   | 0.39322892 |
| -0.107444877 | cg04173688 | KIAA1530          | 4  | 1.45E-07   | 0.84815175 |
| -0.170066651 | cg08908131 | KIAA1598;KIA      | 10 | 0.00138309 | 0.60405826 |
| -0.145824697 | cg23977002 | KIDINS220         | 2  | 2.71E-11   | 0.86498586 |
| -0.125273172 | cg15414930 | KIF13A;KIF13      | 6  | 0.00045265 | 0.57895033 |
| -0.146299557 | cg20106866 | KIF13B            | 8  | 0.03800487 | 0.68850976 |
| -0.105367517 | cg09888753 | KIF13B            | 8  | 1.51E-07   | 0.75451518 |
| -0.10631889  | cg12459000 | KIF17;KIF17       | 1  | 0.0044795  | 0.68744938 |

|              |            |              |    |            |            |
|--------------|------------|--------------|----|------------|------------|
| -0.124714468 | cg03877174 | KIF1C        | 17 | 2.15E-05   | 0.42436618 |
| -0.131405873 | cg19800856 | KIF26A       | 14 | 8.67E-06   | 0.75829848 |
| -0.118370221 | cg15206171 | KIFC1        | 6  | 0.00037601 | 0.62953358 |
| -0.126381529 | cg20176989 | KIR3DL2      | 19 | 1.26E-10   | 0.71735158 |
| -0.121019252 | cg24717078 | KIRREL3;KIRF | 11 | 5.11E-09   | 0.67800364 |
| -0.104114205 | cg01304993 | KLHDC4       | 16 | 0.00013913 | 0.66416523 |
| -0.109805511 | cg18774642 | KLHL14       | 18 | 6.25E-07   | 0.74889862 |
| -0.104255957 | cg09606470 | KLHL6        | 3  | 0.00135866 | 0.58932833 |
| -0.102812292 | cg25104107 | KPRP         | 1  | 2.46E-05   | 0.58857239 |
| -0.127034277 | cg24340657 | KRT24        | 17 | 9.06E-08   | 0.47441635 |
| -0.150410397 | cg04918314 | KRT75        | 12 | 3.03E-11   | 0.85575742 |
| -0.114876813 | cg04911139 | KSR1         | 17 | 1.38E-07   | 0.4398242  |
| -0.176926356 | cg17863139 | LAD1         | 1  | 1.01E-10   | 0.37353644 |
| -0.109934325 | cg02052536 | LAMB1        | 7  | 2.51E-09   | 0.56795324 |
| -0.102266811 | cg19471856 | LAMB4        | 7  | 5.59E-08   | 0.82880376 |
| -0.10105085  | cg03801871 | LBH          | 2  | 0.00084148 | 0.4885491  |
| -0.294048233 | cg15923484 | LCE1E        | 1  | 9.63E-05   | 0.43557687 |
| -0.131825044 | cg11807188 | LEPR;LEPR;LE | 1  | 5.65E-12   | 0.51040531 |
| -0.126750067 | cg17830682 | LGR6;LGR6;L  | 1  | 0.00015552 | 0.44860548 |
| -0.132870169 | cg13385220 | LGR6;LGR6;L  | 1  | 9.48E-06   | 0.43747787 |
| -0.172424485 | cg21902325 | LHFPL2       | 5  | 0.00240753 | 0.45295353 |
| -0.124251354 | cg14425564 | LHX2         | 9  | 7.09E-07   | 0.34969056 |
| -0.164046556 | cg17040753 | LIMS3-LOC4   | 2  | 0.00038991 | 0.6319046  |
| -0.176269514 | cg09610311 | LIPC         | 15 | 2.86E-05   | 0.54807809 |
| -0.107903629 | cg15539962 | LLGL2;LLGL2  | 17 | 5.46E-06   | 0.56916883 |
| -0.106194777 | cg18087306 | LMNB2        | 19 | 1.04E-08   | 0.66430926 |
| -0.108625339 | cg14905657 | LMO3;LMO3    | 12 | 5.71E-09   | 0.35148873 |
| -0.124587551 | cg26575637 | LMO3;LMO3    | 12 | 4.38E-09   | 0.38201051 |
| -0.100272821 | cg15003194 | LOC1001282   | 11 | 5.86E-05   | 0.69078779 |
| -0.113442013 | cg05304979 | LOC1001296   | 16 | 1.98E-08   | 0.52312034 |
| -0.161729352 | cg06928952 | LOC1001296   | 16 | 3.77E-08   | 0.68756163 |
| -0.117751238 | cg21916479 | LOC1001315   | 3  | 0.00012331 | 0.70055887 |
| -0.107344124 | cg18034368 | LOC1001697   | 10 | 4.43E-08   | 0.76286564 |
| -0.1601252   | cg05177746 | LOC1002160   | 10 | 6.47E-06   | 0.48837363 |
| -0.106862898 | cg03184472 | LOC1002717   | 2  | 0.00027928 | 0.48167447 |
| -0.221119229 | cg04831076 | LOC153328    | 5  | 0.00083407 | 0.5281793  |
| -0.109378332 | cg15400629 | LOC285548    | 4  | 0.00011785 | 0.68257386 |
| -0.11791937  | cg17809748 | LOC285548    | 4  | 3.19E-08   | 0.60933224 |
| -0.102221729 | cg11582018 | LOC339524;L  | 1  | 1.86E-06   | 0.35612661 |
| -0.100959262 | cg06811361 | LOC399959;L  | 11 | 0.02303542 | 0.70122991 |
| -0.188856647 | cg16396919 | LOC400043    | 12 | 2.38E-08   | 0.6859815  |
| -0.150169963 | cg03536711 | LOC400804    | 1  | 2.33E-06   | 0.64069418 |
| -0.111806028 | cg08460812 | LOC641518;L  | 4  | 5.66E-10   | 0.57311317 |
| -0.216692711 | cg10803722 | LOC642852    | 21 | 0.0003744  | 0.69535803 |
| -0.141949814 | cg12204343 | LOC645323;L  | 5  | 8.22E-05   | 0.50373973 |
| -0.104362512 | cg13750802 | LOC646982;L  | 13 | 3.91E-07   | 0.64027681 |

|              |            |              |    |            |            |
|--------------|------------|--------------|----|------------|------------|
| -0.105034404 | cg20148389 | LOC646982;L  | 13 | 4.43E-10   | 0.79148083 |
| -0.108460721 | cg08569979 | LOC646982;L  | 13 | 5.34E-10   | 0.68600999 |
| -0.102820167 | cg09153895 | LOC653653    | 17 | 2.32E-05   | 0.67461641 |
| -0.251342352 | cg14550519 | LOC653653    | 17 | 3.79E-06   | 0.53669703 |
| -0.17774154  | cg08715187 | LOC91316;RC  | 22 | 1.68E-13   | 0.6208349  |
| -0.165816831 | cg07902156 | LPCAT1       | 5  | 4.21E-05   | 0.87425056 |
| -0.162272807 | cg07627639 | LPCAT2       | 16 | 2.71E-08   | 0.39281006 |
| -0.146473176 | cg04773529 | LPP;LPP;LPP  | 3  | 0.00042944 | 0.42724434 |
| -0.145809124 | cg19935951 | LRBA         | 4  | 8.16E-05   | 0.61722567 |
| -0.136680776 | cg03521113 | LRMP         | 12 | 0.00027938 | 0.40128919 |
| -0.111117246 | cg05336056 | LRP2         | 2  | 2.82E-11   | 0.70429614 |
| -0.111261422 | cg20437668 | LRPAP1       | 4  | 7.85E-10   | 0.85000466 |
| -0.103272553 | cg26466258 | LRRC14B      | 5  | 4.16E-14   | 0.89600352 |
| -0.172692426 | cg00428692 | LRRC14B      | 5  | 3.26E-09   | 0.40754265 |
| -0.100395515 | cg15726700 | LRRC33       | 3  | 6.09E-09   | 0.7592173  |
| -0.172726215 | cg24602245 | LRRC47       | 1  | 6.37E-15   | 0.76973065 |
| -0.142768966 | cg25577090 | LRRC61;LRRC  | 7  | 1.01E-10   | 0.79493841 |
| -0.121255441 | cg09037813 | LRRFIP1;LRRF | 2  | 7.37E-06   | 0.69753634 |
| -0.144467097 | cg10984625 | LRRFIP1;LRRF | 2  | 7.76E-05   | 0.57332851 |
| -0.123377403 | cg03077671 | LYL1         | 19 | 3.47E-08   | 0.4950457  |
| -0.174429652 | cg21301224 | LYN;LYN      | 8  | 4.26E-06   | 0.46837001 |
| -0.171307062 | cg19753174 | LYPLAL1      | 1  | 0.00141103 | 0.45261444 |
| -0.166156392 | cg22367631 | MACF1        | 1  | 0.03107121 | 0.53031795 |
| -0.109904119 | cg22963979 | MAD1L1;MA    | 7  | 0.01096989 | 0.46280379 |
| -0.109658489 | cg26584120 | MAD1L1;MA    | 7  | 1.05E-07   | 0.52508412 |
| -0.207668231 | cg23080908 | MAGI1;MAG    | 3  | 3.54E-08   | 0.78142566 |
| -0.136510588 | cg18405299 | MAGI2        | 7  | 0.0001455  | 0.64284045 |
| -0.101772412 | cg19554257 | MAP1LC3B2    | 12 | 0.00068643 | 0.42062887 |
| -0.206872102 | cg17875657 | MAP2         | 2  | 7.16E-09   | 0.63216459 |
| -0.196198633 | cg04789365 | MAP3K6       | 1  | 7.30E-05   | 0.64250811 |
| -0.132481676 | cg19808085 | MAPK8IP2;IV  | 22 | 4.46E-05   | 0.42895397 |
| -0.236418703 | cg24228559 | MAPK8IP2;IV  | 22 | 0.00334139 | 0.75017463 |
| -0.138973525 | cg17852224 | MAPK8IP2;IV  | 22 | 6.22E-08   | 0.35990523 |
| -0.202378323 | cg09877744 | MAPK8IP2;IV  | 22 | 2.54E-09   | 0.36511387 |
| -0.164238824 | cg10447222 | MATN2;MAT    | 8  | 8.84E-09   | 0.46408603 |
| -0.126808834 | cg21847368 | MCF2L;MCF2   | 13 | 0.00132052 | 0.50713445 |
| -0.120037474 | cg16325826 | MCF2L;MCF2   | 13 | 2.27E-14   | 0.84850293 |
| -0.11808016  | cg04708126 | MCF2L;MCF2   | 13 | 7.61E-15   | 0.86776008 |
| -0.110438537 | cg20732304 | MCF2L;MCF2   | 13 | 8.78E-07   | 0.53224543 |
| -0.128278646 | cg25307724 | MCF2L;MCF2   | 13 | 5.07E-13   | 0.84955546 |
| -0.126899198 | cg14783051 | MCF2L;MCF2   | 13 | 9.76E-17   | 0.88359493 |
| -0.103500658 | cg21067465 | ME3;ME3;MI   | 11 | 2.72E-06   | 0.68698736 |
| -0.130247857 | cg09416908 | ME3;ME3;MI   | 11 | 0.00022751 | 0.61495052 |
| -0.116532197 | cg01384290 | MECOM        | 3  | 2.92E-06   | 0.70149853 |
| -0.135255041 | cg10600701 | MECOM        | 3  | 1.57E-05   | 0.39779145 |
| -0.107227256 | cg12962542 | MECOM        | 3  | 4.93E-09   | 0.57004528 |

|              |            |             |    |            |            |
|--------------|------------|-------------|----|------------|------------|
| -0.273285386 | cg21545313 | MECOM       | 3  | 1.14E-10   | 0.36462737 |
| -0.188889753 | cg00024967 | MECOM       | 3  | 4.41E-07   | 0.42689331 |
| -0.102031518 | cg08004073 | MECOM       | 3  | 3.80E-09   | 0.46347652 |
| -0.321139078 | cg00962903 | MECOM;MEI   | 3  | 2.61E-09   | 0.79192921 |
| -0.129124553 | cg04754652 | MED12L;GPR  | 3  | 1.68E-05   | 0.69897675 |
| -0.105491254 | cg02955098 | MEGF6       | 1  | 1.58E-12   | 0.44370855 |
| -0.161302503 | cg05334053 | MEGF6       | 1  | 3.09E-10   | 0.79423055 |
| -0.131395825 | cg05496203 | MEIS1       | 2  | 7.23E-05   | 0.19080197 |
| -0.105772921 | cg06796713 | MEIS1       | 2  | 0.00030809 | 0.23971497 |
| -0.102379555 | cg23497016 | MEIS1       | 2  | 8.71E-12   | 0.24466047 |
| -0.109706389 | cg04751149 | MEIS1       | 2  | 2.14E-14   | 0.28688688 |
| -0.101651255 | cg03589296 | MEIS1       | 2  | 6.67E-08   | 0.30830242 |
| -0.134973624 | cg23398076 | MEIS1       | 2  | 1.03E-09   | 0.44450379 |
| -0.152061442 | cg16178603 | MEIS1       | 2  | 2.56E-13   | 0.38303328 |
| -0.103516345 | cg09462924 | MEIS1       | 2  | 1.43E-16   | 0.42198139 |
| -0.11168245  | cg00995986 | MEIS1       | 2  | 5.11E-11   | 0.44578563 |
| -0.288624444 | cg23972738 | MEIS1       | 2  | 5.82E-13   | 0.48251388 |
| -0.243799587 | cg14775296 | MEIS1       | 2  | 6.02E-12   | 0.51244994 |
| -0.147915754 | cg06994420 | MEIS1       | 2  | 4.07E-15   | 0.74197076 |
| -0.11239178  | cg02551743 | MEIS1       | 2  | 4.70E-12   | 0.5104379  |
| -0.106519014 | cg17945976 | MEIS1       | 2  | 4.61E-13   | 0.48045621 |
| -0.105790086 | cg22731271 | MEIS1       | 2  | 1.59E-16   | 0.53833898 |
| -0.210781921 | cg17107572 | MEIS1       | 2  | 7.25E-16   | 0.5111432  |
| -0.104454929 | cg08238215 | MEIS1       | 2  | 2.32E-17   | 0.57362245 |
| -0.138007785 | cg11433622 | MEIS1       | 2  | 2.26E-17   | 0.54124309 |
| -0.112386843 | cg04288999 | MEIS1       | 2  | 4.78E-18   | 0.58004045 |
| -0.102245972 | cg09535924 | MEIS1       | 2  | 2.49E-17   | 0.74538926 |
| -0.10012476  | cg12082609 | MEIS1       | 2  | 5.33E-16   | 0.64850486 |
| -0.132065822 | cg06833110 | MEIS1       | 2  | 1.61E-19   | 0.64702628 |
| -0.110733406 | cg26537478 | MEIS1       | 2  | 5.46E-19   | 0.67230433 |
| -0.129271789 | cg10464312 | MEIS1       | 2  | 6.92E-12   | 0.73018634 |
| -0.111203735 | cg01271812 | MEIS1       | 2  | 2.18E-18   | 0.72505366 |
| -0.116196441 | cg09550083 | MEIS1       | 2  | 1.76E-19   | 0.85733483 |
| -0.118272976 | cg05877497 | MEIS1       | 2  | 1.37E-19   | 0.75531025 |
| -0.102581793 | cg06933370 | MEIS2;MEIS2 | 15 | 5.07E-11   | 0.28819179 |
| -0.114859393 | cg09896544 | MEIS2;MEIS2 | 15 | 0.00026454 | 0.35577035 |
| -0.126595674 | cg09863630 | MEIS2;MEIS2 | 15 | 1.80E-05   | 0.68162124 |
| -0.122210125 | cg11362604 | MEIS2;MEIS2 | 15 | 4.79E-10   | 0.30940058 |
| -0.115019056 | cg25221496 | MEIS2;MEIS2 | 15 | 2.73E-09   | 0.84115515 |
| -0.103641186 | cg04339553 | MEIS2;MEIS2 | 15 | 2.36E-09   | 0.68992511 |
| -0.135722414 | cg00691830 | MEIS2;MEIS2 | 15 | 6.52E-17   | 0.44750327 |
| -0.158395873 | cg23677243 | MEIS2;MEIS2 | 15 | 3.76E-17   | 0.56735255 |
| -0.116432688 | cg03396151 | MEIS2;MEIS2 | 15 | 1.28E-11   | 0.46038556 |
| -0.104444865 | cg02377544 | MEIS2;MEIS2 | 15 | 3.76E-18   | 0.69986673 |
| -0.171050641 | cg24357619 | MEIS2;MEIS2 | 15 | 1.65E-12   | 0.48271268 |
| -0.170274347 | cg19010490 | MEIS2;MEIS2 | 15 | 1.17E-15   | 0.75183046 |



|              |            |              |    |            |            |
|--------------|------------|--------------|----|------------|------------|
| -0.117770879 | cg26708220 | MEIS2;MEIS2  | 15 | 2.54E-16   | 0.65387678 |
| -0.11707481  | cg13181974 | MEIS2;MEIS2  | 15 | 2.24E-18   | 0.59540332 |
| -0.104579521 | cg15902390 | MEIS2;MEIS2  | 15 | 1.84E-17   | 0.65090805 |
| -0.127281631 | cg21177426 | MEIS2;MEIS2  | 15 | 8.06E-17   | 0.85276589 |
| -0.102837993 | cg13181164 | MEIS2;MEIS2  | 15 | 6.28E-16   | 0.62457254 |
| -0.10355486  | cg19560971 | MFRP;C1QTN   | 11 | 6.29E-09   | 0.62253326 |
| -0.168359623 | cg04212021 | MGAT1;MGA    | 5  | 0.00048918 | 0.82533641 |
| -0.164409081 | cg09277376 | MGC12982     | 1  | 0.00377238 | 0.53599567 |
| -0.100692739 | cg18595867 | MGC12982     | 1  | 0.00648775 | 0.70483715 |
| -0.134904967 | cg15590989 | MGC45800     | 4  | 3.93E-07   | 0.28465127 |
| -0.149708636 | cg03867465 | MGC45800     | 4  | 4.90E-06   | 0.54835811 |
| -0.154870965 | cg08985979 | MGC45800     | 4  | 0.00016335 | 0.43073378 |
| -0.106762851 | cg01922891 | MGRN1;MGF    | 16 | 2.23E-09   | 0.34567167 |
| -0.194090232 | cg06323332 | MGRN1;MGF    | 16 | 1.71E-12   | 0.48086493 |
| -0.173112407 | cg07635227 | MGRN1;MGF    | 16 | 1.68E-07   | 0.6193929  |
| -0.379869483 | cg01156249 | MGRN1;MGF    | 16 | 7.95E-09   | 0.59631197 |
| -0.366701517 | cg04962621 | MGRN1;MGF    | 16 | 1.14E-08   | 0.54902828 |
| -0.251983731 | cg00078456 | MIB2;MIB2;M  | 1  | 0.00012651 | 0.62557924 |
| -0.24897866  | cg02884661 | MICA         | 6  | 0.02473464 | 0.70313456 |
| -0.238097747 | cg11268327 | MICA         | 6  | 0.01448182 | 0.6479526  |
| -0.232908293 | cg02759751 | MICALL2      | 7  | 1.44E-05   | 0.75187557 |
| -0.215388917 | cg11251690 | MICALL2      | 7  | 3.89E-08   | 0.72577489 |
| -0.207801313 | cg02492818 | MICALL2      | 7  | 2.46E-06   | 0.72043521 |
| -0.173611025 | cg15930380 | MIER1;MIER:  | 1  | 9.15E-11   | 0.54212716 |
| -0.16236262  | cg17940587 | MINPP1       | 10 | 0.00021349 | 0.48423914 |
| -0.150194288 | cg19519747 | MIR10B       | 2  | 1.18E-07   | 0.80435415 |
| -0.121511911 | cg27083040 | MIR145;LOC   | 5  | 1.68E-05   | 0.59955125 |
| -0.283625525 | cg11574092 | MIR149;PP14  | 2  | 9.17E-06   | 0.6075466  |
| -0.278465618 | cg08053137 | MIR196A2     | 12 | 1.45E-07   | 0.2715568  |
| -0.263579651 | cg18771937 | MIR196A2     | 12 | 2.80E-09   | 0.50020988 |
| -0.260535135 | cg14679255 | MIR196A2     | 12 | 2.14E-09   | 0.49950606 |
| -0.252691342 | cg07641807 | MIR19A;MIR   | 13 | 2.59E-05   | 0.51311583 |
| -0.220321055 | cg02297838 | MIR19A;MIR   | 13 | 3.21E-07   | 0.64214231 |
| -0.199674427 | cg00215432 | MIR375       | 2  | 1.89E-06   | 0.4239817  |
| -0.19886263  | cg04916802 | MIR548F5;NI  | 13 | 6.66E-05   | 0.39742153 |
| -0.19866894  | cg12029639 | MIR548F5;NI  | 13 | 8.58E-05   | 0.32126972 |
| -0.179990973 | cg07554357 | MIR548F5;NI  | 13 | 8.68E-05   | 0.78785488 |
| -0.172125625 | cg24185852 | MIR585;SLIT: | 5  | 1.94E-12   | 0.4651482  |
| -0.153909771 | cg13767001 | MIR759       | 13 | 0.00808977 | 0.51674809 |
| -0.149935386 | cg09099500 | MIR942;TTF2  | 1  | 2.51E-05   | 0.46810833 |
| -0.137808122 | cg02558684 | MIRLET7A1    | 9  | 0.00280648 | 0.5230623  |
| -0.135180074 | cg15672749 | MKS1;MKS1    | 17 | 0.00311931 | 0.42220391 |
| -0.119731179 | cg14070755 | MLPH;MLPH    | 2  | 5.00E-05   | 0.46678174 |
| -0.320564841 | cg02081327 | MMEL1        | 1  | 2.08E-08   | 0.53791419 |
| -0.264082658 | cg00667048 | MORN1        | 1  | 1.02E-06   | 0.61082037 |
| -0.259188033 | cg08868601 | MORN1        | 1  | 0.0017005  | 0.62329485 |

|              |            |            |    |            |            |
|--------------|------------|------------|----|------------|------------|
| -0.258616207 | cg05787839 | MORN1      | 1  | 6.33E-06   | 0.45727226 |
| -0.254362377 | cg13659446 | MRC2       | 17 | 1.22E-05   | 0.38599201 |
| -0.209257972 | cg02556430 | MRPS6;SLC5 | 21 | 0.00367391 | 0.62746819 |
| -0.207324709 | cg07377994 | MSI2;MSI2  | 17 | 0.00109784 | 0.8820997  |
| -0.199703821 | cg13654836 | MSI2;MSI2  | 17 | 1.69E-05   | 0.49048638 |
| -0.196056517 | cg08185808 | MSLN;MSLN  | 16 | 7.81E-08   | 0.56803839 |
| -0.193389034 | cg16584392 | MST1P9     | 1  | 5.89E-06   | 0.4648589  |
| -0.188833903 | cg12296269 | MST1P9     | 1  | 9.12E-08   | 0.40122404 |
| -0.184140665 | cg24183741 | MTA1       | 14 | 2.96E-12   | 0.83344829 |
| -0.152009335 | cg19001023 | MTA1       | 14 | 2.17E-14   | 0.83018335 |
| -0.134612662 | cg18238340 | MTA1       | 14 | 1.15E-16   | 0.67980554 |
| -0.120882784 | cg18920088 | MTHFD1L    | 6  | 0.0090899  | 0.53446806 |
| -0.119813408 | cg04718883 | MTHFD1L    | 6  | 2.65E-10   | 0.84874555 |
| -0.10728844  | cg06094043 | MTMR6      | 13 | 4.61E-09   | 0.66146786 |
| -0.105279171 | cg22718696 | MTOR       | 1  | 8.75E-06   | 0.52913347 |
| -0.265659119 | cg15589427 | MUC4;MUC4  | 3  | 1.77E-08   | 0.57154012 |
| -0.195726324 | cg04524478 | MYF5       | 12 | 2.95E-05   | 0.36891769 |
| -0.11718937  | cg25176746 | MYF6       | 12 | 9.24E-06   | 0.41338829 |
| -0.115163603 | cg01828111 | MYH11;NDE  | 16 | 7.16E-13   | 0.85671275 |
| -0.198118715 | cg23400451 | MYH4       | 17 | 3.00E-05   | 0.66194179 |
| -0.294564026 | cg14067524 | MYO16      | 13 | 0.00982173 | 0.56943213 |
| -0.101482755 | cg17856559 | MYO16      | 13 | 1.36E-07   | 0.63003596 |
| -0.129868412 | cg03134230 | MYO1B;MYC  | 2  | 2.82E-07   | 0.61867677 |
| -0.113133666 | cg13887966 | MYO1E      | 15 | 3.45E-05   | 0.48036697 |
| -0.12935797  | cg13523014 | MYO1F      | 19 | 9.93E-09   | 0.85439235 |
| -0.10062133  | cg22111043 | MYO1G      | 7  | 1.73E-06   | 0.63354926 |
| -0.136248778 | cg21512773 | MYO7B      | 2  | 2.94E-05   | 0.6253792  |
| -0.111212664 | cg16526705 | MYO9B;MYC  | 19 | 1.98E-09   | 0.77461062 |
| -0.107737892 | cg15438314 | MYO9B;MYC  | 19 | 1.55E-07   | 0.54268642 |
| -0.173739857 | cg12229979 | MYO9B;MYC  | 19 | 2.21E-07   | 0.53823114 |
| -0.100089733 | cg20816077 | MYOM2      | 8  | 1.04E-08   | 0.85014377 |
| -0.105411067 | cg03243893 | MYOM2      | 8  | 2.54E-06   | 0.64994672 |
| -0.102382566 | cg19368031 | MYST4      | 10 | 1.53E-06   | 0.68941759 |
| -0.120199306 | cg07410339 | MYST4      | 10 | 6.84E-05   | 0.53136747 |
| -0.109989193 | cg27319917 | N4BP1      | 16 | 0.00057457 | 0.7336582  |
| -0.104633995 | cg01701649 | N4BP1      | 16 | 0.00174508 | 0.70698623 |
| -0.122877296 | cg02659217 | N4BP3      | 5  | 2.28E-08   | 0.56740127 |
| -0.178596865 | cg15067606 | NAA50      | 3  | 0.00118739 | 0.48555886 |
| -0.11171931  | cg02493986 | NACC2      | 9  | 0.02729949 | 0.60697243 |
| -0.122864925 | cg09185911 | NADK       | 1  | 4.14E-09   | 0.83753531 |
| -0.102950879 | cg23089913 | NANOS1     | 10 | 6.44E-05   | 0.42184308 |
| -0.143809021 | cg15539330 | NANOS1     | 10 | 1.53E-06   | 0.57957043 |
| -0.224293976 | cg19565262 | NAT8       | 2  | 2.99E-05   | 0.54376206 |
| -0.154436309 | cg05029983 | NAT8L      | 4  | 7.05E-06   | 0.46401007 |
| -0.13649556  | cg24253904 | NAV1       | 1  | 0.00033307 | 0.31651659 |
| -0.125590919 | cg14969261 | NAV2       | 11 | 1.53E-09   | 0.66256298 |

|              |            |            |    |            |            |
|--------------|------------|------------|----|------------|------------|
| -0.106900966 | cg09175834 | NAV3       | 12 | 0.0114531  | 0.63246456 |
| -0.101573794 | cg01816186 | NBAS       | 2  | 7.61E-06   | 0.63482835 |
| -0.100424719 | cg00729885 | NBEA       | 13 | 0.00061639 | 0.4617611  |
| -0.106898516 | cg14774585 | NBEA       | 13 | 5.46E-08   | 0.6378905  |
| -0.106428092 | cg25546488 | NBN        | 8  | 0.01044262 | 0.47906389 |
| -0.153535468 | cg27110054 | NCALD;NCAL | 8  | 1.02E-06   | 0.37331886 |
| -0.138299508 | cg01579216 | NCF2;NCF2  | 1  | 3.58E-05   | 0.50936027 |
| -0.104133411 | cg03729042 | NCF2;NCF2  | 1  | 5.23E-14   | 0.63663391 |
| -0.129288747 | cg18123344 | NCKAP5;NCK | 2  | 8.10E-06   | 0.22973689 |
| -0.148825165 | cg22247748 | NCKAP5;NCK | 2  | 1.02E-06   | 0.81813978 |
| -0.121069047 | cg19676227 | NCKAP5;NCK | 2  | 1.02E-05   | 0.54657009 |
| -0.158055959 | cg18984282 | NCKAP5;NCK | 2  | 3.44E-06   | 0.37935433 |
| -0.100509778 | cg17081914 | NCKAP5;NCK | 2  | 2.85E-08   | 0.38194159 |
| -0.113895585 | cg26428069 | NCKAP5;NCK | 2  | 2.10E-12   | 0.62633849 |
| -0.111562108 | cg01586116 | NCKAP5;NCK | 2  | 2.16E-13   | 0.52452061 |
| -0.289976235 | cg26794830 | NCLN       | 19 | 4.15E-06   | 0.66608425 |
| -0.279587873 | cg02983759 | NCRNA00111 | 21 | 5.11E-06   | 0.53514359 |
| -0.109434777 | cg11798406 | NCRNA00114 | 21 | 0.00126018 | 0.41163043 |
| -0.200696464 | cg08636922 | NCRNA00162 | 21 | 0.00026015 | 0.43584877 |
| -0.142090243 | cg26868806 | NCRNA00200 | 10 | 1.60E-06   | 0.62814497 |
| -0.119916922 | cg16674484 | NDST1      | 5  | 2.24E-05   | 0.46000428 |
| -0.282114116 | cg08580187 | NECAB2     | 16 | 0.03696657 | 0.64203901 |
| -0.24918089  | cg15972264 | NEDD9      | 6  | 1.24E-12   | 0.66356294 |
| -0.172049164 | cg16955407 | NEDD9      | 6  | 1.58E-12   | 0.8039565  |
| -0.169030745 | cg18627677 | NEDD9      | 6  | 1.25E-13   | 0.70942492 |
| -0.165578503 | cg27426044 | NFASC;NFAS | 1  | 1.93E-08   | 0.56517806 |
| -0.161424369 | cg13098379 | NFASC;NFAS | 1  | 1.66E-07   | 0.75400723 |
| -0.160022292 | cg11147886 | NFAT5;NFAT | 16 | 0.00324579 | 0.53108375 |
| -0.153322452 | cg06499262 | NFAT5;NFAT | 16 | 0.0003069  | 0.5120925  |
| -0.151992631 | cg01514831 | NFATC1;NFA | 18 | 0.0011534  | 0.33796818 |
| -0.150589572 | cg16421653 | NFATC1;NFA | 18 | 0.00010094 | 0.80866595 |
| -0.149720861 | cg11321921 | NFATC1;NFA | 18 | 1.79E-05   | 0.79939837 |
| -0.136875465 | cg18590092 | NFATC1;NFA | 18 | 5.79E-06   | 0.53758952 |
| -0.131232733 | cg21192698 | NFATC1;NFA | 18 | 2.52E-10   | 0.60027457 |
| -0.128812924 | cg23384027 | NFE2;NFE2  | 12 | 1.10E-05   | 0.49986726 |
| -0.125565975 | cg12499092 | NFYB       | 12 | 1.11E-07   | 0.85334275 |
| -0.125144514 | cg14911689 | NINJ2      | 12 | 0.02249384 | 0.62274611 |
| -0.120332942 | cg26654770 | NINJ2      | 12 | 0.02656237 | 0.63622742 |
| -0.117701956 | cg01201512 | NINJ2      | 12 | 0.01604892 | 0.65988292 |
| -0.116147163 | cg13081568 | NKAIN2     | 6  | 3.91E-13   | 0.72079595 |
| -0.114674695 | cg24721899 | NKX3-2     | 4  | 8.78E-08   | 0.46378065 |
| -0.112093589 | cg02268561 | NMT2       | 10 | 8.42E-09   | 0.58661612 |
| -0.111246542 | cg01243823 | NOD2       | 16 | 7.41E-05   | 0.4432545  |
| -0.109680846 | cg09479286 | NOSTRIN;NO | 2  | 0.02252778 | 0.35400641 |
| -0.108010012 | cg14205001 | NOTCH1     | 9  | 3.38E-07   | 0.81670308 |
| -0.105622374 | cg14120703 | NOTCH1     | 9  | 1.46E-05   | 0.81198807 |

|              |            |                 |    |            |            |
|--------------|------------|-----------------|----|------------|------------|
| -0.105191507 | cg14065526 | NOTCH1          | 9  | 8.78E-06   | 0.7114626  |
| -0.103277875 | cg19687075 | NOTCH1          | 9  | 3.01E-06   | 0.48156639 |
| -0.101215902 | cg13861904 | NOTCH1          | 9  | 5.77E-11   | 0.61696318 |
| -0.112667827 | cg09744036 | NOTUM           | 17 | 0.00039761 | 0.61104339 |
| -0.133944365 | cg10543035 | NPHS2           | 1  | 0.00142374 | 0.71791894 |
| -0.138232032 | cg05445244 | NPY1R           | 4  | 0.00012032 | 0.47171596 |
| -0.101313866 | cg13772742 | NR2F2;NR2F1     | 15 | 3.65E-06   | 0.76053799 |
| -0.143672032 | cg00426720 | NR4A2           | 2  | 2.88E-06   | 0.32145222 |
| -0.119588757 | cg20570611 | NR4A2           | 2  | 0.00022067 | 0.6966868  |
| -0.101358545 | cg06101180 | NR4A2           | 2  | 0.00037635 | 0.75988101 |
| -0.113971575 | cg13229857 | NR5A2;NR5A1     | 1  | 2.31E-06   | 0.53184631 |
| -0.145636009 | cg23221090 | NRBF2           | 10 | 9.99E-11   | 0.37990838 |
| -0.121594623 | cg13216112 | NRBF2           | 10 | 1.37E-13   | 0.58386063 |
| -0.127788047 | cg00565348 | NRN1            | 6  | 2.40E-06   | 0.37532226 |
| -0.115090744 | cg03707308 | NRN1            | 6  | 3.17E-06   | 0.35285254 |
| -0.140281626 | cg05265020 | NRN1            | 6  | 0.00305136 | 0.5300967  |
| -0.101015349 | cg10304637 | NRN1            | 6  | 2.11E-08   | 0.57178359 |
| -0.106323859 | cg17658634 | NRN1            | 6  | 3.85E-05   | 0.45060667 |
| -0.147744991 | cg06609051 | NRXN1;NRXN1-AS1 | 2  | 4.07E-05   | 0.53869696 |
| -0.145482165 | cg09989847 | NT5E            | 6  | 0.000191   | 0.43591661 |
| -0.12498171  | cg18377376 | NTM             | 11 | 9.53E-06   | 0.71383905 |
| -0.109580295 | cg27083553 | NTM             | 11 | 2.06E-09   | 0.71274089 |
| -0.100978286 | cg11362049 | NTM;NTM;NTM     | 11 | 3.15E-09   | 0.74220907 |
| -0.129876551 | cg21658372 | NTN5;SEC1       | 19 | 8.37E-07   | 0.73734823 |
| -0.112725527 | cg07452706 | NUDT14          | 14 | 2.52E-12   | 0.63172026 |
| -0.105332942 | cg14717116 | NXN             | 17 | 3.13E-06   | 0.58604263 |
| -0.159712428 | cg06604589 | NXN             | 17 | 0.00358111 | 0.3578983  |
| -0.15379092  | cg24101979 | NXN             | 17 | 0.00020297 | 0.58340601 |
| -0.130965315 | cg08190450 | NXN             | 17 | 0.00191028 | 0.55629287 |
| -0.109191335 | cg20633370 | NXN             | 17 | 1.85E-05   | 0.72724481 |
| -0.100184614 | cg23644589 | OBSCN;OBSCN     | 1  | 1.19E-05   | 0.89434057 |
| -0.120907239 | cg06651505 | ODZ2            | 5  | 6.19E-14   | 0.8243434  |
| -0.157102818 | cg16658460 | ODZ2            | 5  | 9.69E-08   | 0.61039277 |
| -0.115028781 | cg09171112 | ODZ2            | 5  | 5.42E-10   | 0.5300233  |
| -0.118954477 | cg14653988 | ODZ2            | 5  | 2.46E-17   | 0.52305697 |
| -0.110022239 | cg08734703 | ODZ4            | 11 | 5.03E-07   | 0.52843656 |
| -0.154360914 | cg27153782 | OLAH;OLAH       | 10 | 7.78E-05   | 0.51528417 |
| -0.11153798  | cg13822849 | OLFM1           | 9  | 0.00017728 | 0.60695549 |
| -0.126355721 | cg18858676 | OR10G8          | 11 | 2.03E-10   | 0.60926495 |
| -0.240252318 | cg22082267 | OR8K1           | 11 | 2.73E-05   | 0.71155612 |
| -0.104532061 | cg03199926 | OSBPL2;OSBI     | 20 | 1.81E-05   | 0.87906027 |
| -0.141772351 | cg04525464 | OSBPL3;OSBI     | 7  | 1.51E-06   | 0.59408997 |
| -0.141075417 | cg16746576 | OSR2;OSR2       | 8  | 0.00015504 | 0.60545936 |
| -0.105366731 | cg16595607 | OTX1            | 2  | 0.00254829 | 0.84773392 |
| -0.265753825 | cg04276301 | OTX1            | 2  | 0.01621321 | 0.6646504  |
| -0.197358934 | cg09830083 | P4HA2;P4HA1     | 5  | 0.00059719 | 0.51937235 |

|              |            |              |    |            |            |
|--------------|------------|--------------|----|------------|------------|
| -0.151356352 | cg17861653 | P4HA2;P4HA   | 5  | 0.00014923 | 0.44947112 |
| -0.11649026  | cg09428340 | PACRG;PACR   | 6  | 7.45E-05   | 0.58470392 |
| -0.144726257 | cg07098722 | PARK2;PARK   | 6  | 6.84E-09   | 0.42622504 |
| -0.101434167 | cg15123662 | PARVA        | 11 | 2.32E-08   | 0.49572287 |
| -0.166087257 | cg11283289 | PATE1        | 11 | 2.37E-08   | 0.60840389 |
| -0.145462374 | cg10913846 | PAX9         | 14 | 7.18E-05   | 0.39160959 |
| -0.110571388 | cg04415798 | PAX9         | 14 | 2.44E-08   | 0.35610399 |
| -0.229557728 | cg09814975 | PAX9         | 14 | 1.69E-09   | 0.75632498 |
| -0.178742821 | cg22238122 | PBX1         | 1  | 0.00240478 | 0.59011471 |
| -0.1650032   | cg26026748 | PBX1         | 1  | 0.00013075 | 0.36886591 |
| -0.112847418 | cg00160440 | PCDH10       | 4  | 0.00280611 | 0.5636003  |
| -0.109044531 | cg17705041 | PCGF3        | 4  | 4.39E-05   | 0.5421712  |
| -0.257141589 | cg17265115 | PCGF3        | 4  | 1.63E-08   | 0.5684754  |
| -0.137867867 | cg09149851 | PCNT         | 21 | 0.00067181 | 0.71602989 |
| -0.100349666 | cg26100986 | PCOLCE       | 7  | 0.00015101 | 0.46412977 |
| -0.110943531 | cg01889899 | PCSK6;PCSK6  | 15 | 1.07E-05   | 0.5074928  |
| -0.138427356 | cg21470711 | PCYT1A       | 3  | 1.68E-05   | 0.53869882 |
| -0.111611369 | cg22623236 | PDE10A;PDE   | 6  | 0.00654703 | 0.83271752 |
| -0.102436409 | cg04989278 | PDE4B;PDE4   | 1  | 1.97E-07   | 0.65436147 |
| -0.335600221 | cg18688704 | PDGFC        | 4  | 0.00011494 | 0.47527293 |
| -0.182396794 | cg23496331 | PDGFRB       | 5  | 2.61E-06   | 0.65606542 |
| -0.173637613 | cg20714347 | PDLIM1       | 10 | 1.91E-10   | 0.61661661 |
| -0.145874153 | cg20449614 | PDLIM2;PDLI  | 8  | 0.00337324 | 0.8050185  |
| -0.14346099  | cg11769400 | PEBP4        | 8  | 0.00034328 | 0.43933713 |
| -0.13485623  | cg12308675 | PER2         | 2  | 0.00067164 | 0.6972307  |
| -0.123703886 | cg07719617 | PER2         | 2  | 9.06E-06   | 0.53263948 |
| -0.115124539 | cg22879834 | PER2         | 2  | 9.04E-06   | 0.62744025 |
| -0.109490896 | cg25310676 | PEX14        | 1  | 8.01E-05   | 0.48924945 |
| -0.166571228 | cg03261682 | PFKFB3       | 10 | 9.45E-06   | 0.62919655 |
| -0.152232353 | cg08289056 | PFKFB3       | 10 | 4.42E-07   | 0.76775494 |
| -0.117348707 | cg19705197 | PFKFB3;PFKF  | 10 | 1.21E-13   | 0.72353889 |
| -0.113984165 | cg16546349 | PFKFB3;PFKF  | 10 | 3.19E-09   | 0.44707759 |
| -0.123025923 | cg14038949 | PFKFB3;PFKF  | 10 | 6.17E-06   | 0.66095876 |
| -0.106036137 | cg13782176 | PFKFB3;PFKF  | 10 | 5.39E-13   | 0.75993601 |
| -0.102871384 | cg08568670 | PFKFB4       | 3  | 1.71E-05   | 0.72093887 |
| -0.13620138  | cg23840010 | PFKP         | 10 | 0.006979   | 0.60879405 |
| -0.105074109 | cg19758448 | PGAP3        | 17 | 9.69E-05   | 0.2709763  |
| -0.11928546  | cg09980384 | PGS1         | 17 | 0.00069555 | 0.66852523 |
| -0.103452359 | cg10619379 | PHF12;PHF1   | 17 | 9.06E-05   | 0.47130225 |
| -0.122549805 | cg00582531 | PHF15        | 5  | 1.30E-10   | 0.78140825 |
| -0.103251945 | cg02304370 | PHRF1        | 11 | 0.00184172 | 0.57568146 |
| -0.186201874 | cg20557688 | PID1;PID1    | 2  | 0.00027091 | 0.67591484 |
| -0.137268759 | cg19397801 | PIP4K2A      | 10 | 0.03810062 | 0.64120518 |
| -0.119249813 | cg19423978 | PIP5K1C      | 19 | 1.87E-06   | 0.53436014 |
| -0.101076119 | cg26049998 | PITPNC1;PITP | 17 | 5.26E-06   | 0.72818157 |
| -0.10359465  | cg14644204 | PITPNM2      | 12 | 2.10E-05   | 0.77287669 |

|              |            |              |    |            |            |
|--------------|------------|--------------|----|------------|------------|
| -0.176043043 | cg07036112 | PKD1;MIR12:  | 16 | 2.56E-05   | 0.80298271 |
| -0.162173048 | cg11550234 | PKN1;PKN1    | 19 | 0.00028922 | 0.45898748 |
| -0.145418963 | cg12611897 | PLCH1;PLCH1  | 3  | 2.98E-05   | 0.83669457 |
| -0.120866476 | cg17560015 | PLEC1;PLEC1  | 8  | 7.99E-09   | 0.3388331  |
| -0.105217062 | cg25720264 | PLEKHA5;PLE  | 12 | 1.17E-06   | 0.40144418 |
| -0.100151481 | cg26895569 | PLEKHA6      | 1  | 2.72E-06   | 0.34214931 |
| -0.100256003 | cg19771173 | PLEKHA6      | 1  | 1.02E-09   | 0.58223126 |
| -0.115594389 | cg09368486 | PLEKHM3      | 2  | 5.91E-09   | 0.42681985 |
| -0.101603    | cg10709246 | PLVAP;PLVAF  | 19 | 9.47E-10   | 0.40316506 |
| -0.100771045 | cg19431623 | PLXDC2       | 10 | 0.00011185 | 0.60011076 |
| -0.106036197 | cg16357930 | PLXNB1;PLXN  | 3  | 0.00024866 | 0.56290114 |
| -0.100418831 | cg05490233 | PLXND1       | 3  | 5.36E-06   | 0.60319889 |
| -0.157178612 | cg17751430 | PNLIPRP1     | 10 | 2.74E-13   | 0.7946356  |
| -0.128938797 | cg06072036 | PNPLA2       | 11 | 6.21E-06   | 0.76179343 |
| -0.102156939 | cg16956999 | POLE         | 12 | 1.27E-08   | 0.77983389 |
| -0.128863281 | cg27197524 | POLE         | 12 | 8.94E-06   | 0.80870595 |
| -0.211079067 | cg23671319 | POU6F2;POL   | 7  | 1.43E-08   | 0.21909162 |
| -0.157334616 | cg15896446 | PPAPDC1A     | 10 | 7.09E-09   | 0.6846183  |
| -0.126835977 | cg10955995 | PPARGC1A     | 4  | 0.00182582 | 0.33132478 |
| -0.111039893 | cg21187108 | PPFIA1;PPFIA | 11 | 0.00413707 | 0.6807261  |
| -0.199398014 | cg01800253 | PPM1F        | 22 | 0.00043367 | 0.67161175 |
| -0.131949671 | cg21113446 | PPP2R2B;PPF  | 5  | 0.0007711  | 0.40771092 |
| -0.209006131 | cg12789488 | PPP2R2D;PPI  | 10 | 0.00398401 | 0.53298046 |
| -0.131698492 | cg15444217 | PPP2R2D;PPI  | 10 | 4.45E-06   | 0.81551945 |
| -0.114284466 | cg24878051 | PRDM16;PRC   | 1  | 4.71E-05   | 0.83466679 |
| -0.113459819 | cg21475097 | PRDM16;PRC   | 1  | 0.01134844 | 0.5906425  |
| -0.157570455 | cg23025459 | PRDM16;PRC   | 1  | 1.16E-07   | 0.59482814 |
| -0.127421552 | cg22726349 | PRDM16;PRC   | 1  | 0.00232027 | 0.81611295 |
| -0.150509055 | cg11251399 | PRDM16;PRC   | 1  | 5.56E-10   | 0.77200312 |
| -0.119928281 | cg24968931 | PRDM16;PRC   | 1  | 2.22E-05   | 0.7700667  |
| -0.106417473 | cg01203812 | PRDM16;PRC   | 1  | 2.04E-05   | 0.77691177 |
| -0.184235522 | cg08160128 | PRDM16;PRC   | 1  | 4.41E-07   | 0.77268517 |
| -0.100877068 | cg26938014 | PRDM6        | 5  | 0.00310017 | 0.67501885 |
| -0.108085367 | cg26403580 | PRDX3;PRDX   | 10 | 1.35E-08   | 0.56629338 |
| -0.134545585 | cg15262954 | PRIC285;PRIC | 20 | 0.00102885 | 0.7589729  |
| -0.113671247 | cg11779113 | PRIC285;PRIC | 20 | 0.00022032 | 0.7122789  |
| -0.145152364 | cg07303091 | PRICKLE1;PRI | 12 | 4.41E-09   | 0.60025539 |
| -0.167166463 | cg07650392 | PRICKLE2     | 3  | 0.0022825  | 0.61179389 |
| -0.122501539 | cg08108224 | PRIM2        | 6  | 6.22E-07   | 0.62049799 |
| -0.106362396 | cg26284782 | PRKAG2;PRK   | 7  | 7.53E-05   | 0.45057716 |
| -0.12145744  | cg17814717 | PRKAG2;PRK   | 7  | 4.19E-06   | 0.50059952 |
| -0.101425266 | cg26482626 | PRKAG2;PRK   | 7  | 2.11E-08   | 0.65874705 |
| -0.125805517 | cg12889538 | PRKAG2;PRK   | 7  | 1.73E-05   | 0.60128045 |
| -0.184530219 | cg09397579 | PRKAG2;PRK   | 7  | 3.63E-06   | 0.42330404 |
| -0.137695995 | cg16581738 | PRKAR1B;PRI  | 7  | 0.00029782 | 0.74710983 |
| -0.109808561 | cg06878741 | PRKAR1B;PRI  | 7  | 0.00146096 | 0.55301346 |

|              |            |             |    |            |            |
|--------------|------------|-------------|----|------------|------------|
| -0.22510532  | cg11315991 | PRKAR1B;PRI | 7  | 2.42E-06   | 0.7166104  |
| -0.123597053 | cg00498360 | PRKCA       | 17 | 2.47E-07   | 0.5935835  |
| -0.109785154 | cg17799599 | PRKCA       | 17 | 9.12E-07   | 0.49381303 |
| -0.102913881 | cg09655520 | PRKCA       | 17 | 1.68E-06   | 0.74173825 |
| -0.131029674 | cg22632947 | PRKCA       | 17 | 2.42E-08   | 0.64085043 |
| -0.10543377  | cg14121185 | PRKCA       | 17 | 1.14E-14   | 0.54193676 |
| -0.224236399 | cg12256705 | PRKCE       | 2  | 0.00450998 | 0.74984509 |
| -0.124583854 | cg23924526 | PRKCE       | 2  | 9.85E-08   | 0.70042922 |
| -0.104131704 | cg24447775 | PRKCZ       | 1  | 6.86E-06   | 0.59916571 |
| -0.144801509 | cg23682913 | PRKCZ;PRKCZ | 1  | 8.15E-07   | 0.41191188 |
| -0.124175926 | cg07671644 | PRKD3       | 2  | 1.92E-06   | 0.72685177 |
| -0.107450447 | cg17757778 | PRKG1;PRKG  | 10 | 1.08E-08   | 0.61355312 |
| -0.228985298 | cg15121267 | PRL;PRL     | 6  | 2.50E-06   | 0.57159779 |
| -0.100505937 | cg22799510 | PROK2;PROK  | 3  | 0.00129867 | 0.67927854 |
| -0.106645991 | cg01904145 | PROK2;PROK  | 3  | 3.27E-07   | 0.77369794 |
| -0.100131254 | cg22264409 | PROK2;PROK  | 3  | 8.97E-09   | 0.67181314 |
| -0.140191253 | cg12459923 | PRPF6       | 20 | 0.0001846  | 0.59669876 |
| -0.135037406 | cg23256579 | PRR4;PRR4   | 12 | 0.00052713 | 0.38456411 |
| -0.121134411 | cg20478080 | PRR5;PRR5;P | 22 | 7.44E-05   | 0.4585649  |
| -0.201247192 | cg21544931 | PRR5L;PRR5L | 11 | 0.00026987 | 0.39126003 |
| -0.147023115 | cg08682153 | PSD2        | 5  | 5.12E-06   | 0.40088408 |
| -0.131268242 | cg01203766 | PSORS1C1    | 6  | 0.01642431 | 0.55202635 |
| -0.181010289 | cg10575846 | PTDSS2      | 11 | 0.00044531 | 0.67038105 |
| -0.119796873 | cg08251761 | PTDSS2      | 11 | 4.03E-07   | 0.66218538 |
| -0.115525036 | cg18336453 | PTK7;PTK7;P | 6  | 2.86E-05   | 0.44970285 |
| -0.125917048 | cg26842815 | PTPN6;PTPN  | 12 | 0.00021875 | 0.74719607 |
| -0.109277014 | cg09017928 | PTPRN2;PTPI | 7  | 2.48E-06   | 0.5632638  |
| -0.109487467 | cg13736939 | PTPRN2;PTPI | 7  | 9.23E-05   | 0.80384087 |
| -0.102186374 | cg13357408 | PTPRN2;PTPI | 7  | 0.01457814 | 0.58415329 |
| -0.102589088 | cg09845489 | PTPRN2;PTPI | 7  | 4.98E-07   | 0.4881166  |
| -0.218735891 | cg04864441 | PTPRN2;PTPI | 7  | 0.00196747 | 0.53078492 |
| -0.124267261 | cg24842334 | PTPRN2;PTPI | 7  | 6.26E-05   | 0.57751288 |
| -0.139365026 | cg11111139 | PTPRN2;PTPI | 7  | 2.86E-11   | 0.64557583 |
| -0.129837391 | cg21323106 | PTPRN2;PTPI | 7  | 7.70E-08   | 0.66761015 |
| -0.110855042 | cg02505956 | PTPRN2;PTPI | 7  | 9.09E-09   | 0.6275991  |
| -0.123939074 | cg27572053 | PTPRN2;PTPI | 7  | 1.03E-14   | 0.65693967 |
| -0.118966042 | cg15085205 | PTPRR       | 12 | 2.28E-05   | 0.5734189  |
| -0.104567784 | cg02100150 | PVT1        | 8  | 2.77E-08   | 0.50028941 |
| -0.164037047 | cg00045902 | PWWP2B;PV   | 10 | 0.00022173 | 0.42954632 |
| -0.102578931 | cg15893360 | PXN;PXN     | 12 | 1.79E-07   | 0.73579047 |
| -0.101477851 | cg27168573 | PXN;PXN     | 12 | 8.48E-07   | 0.41541498 |
| -0.123080554 | cg14136168 | QSOX2       | 9  | 4.77E-07   | 0.71735722 |
| -0.110115422 | cg09408143 | RAB11FIP3;R | 16 | 6.73E-09   | 0.56797743 |
| -0.10220235  | cg17833066 | RAB11FIP4   | 17 | 2.25E-12   | 0.55871795 |
| -0.102442497 | cg06755297 | RAB3GAP2;A  | 1  | 4.03E-06   | 0.83048216 |
| -0.10406619  | cg22213445 | RAB7A       | 3  | 3.76E-05   | 0.71118561 |

|              |            |             |    |            |            |
|--------------|------------|-------------|----|------------|------------|
| -0.144398998 | cg14891022 | RAC2        | 22 | 9.75E-08   | 0.62711742 |
| -0.161705248 | cg18825221 | RAD51L1;RAI | 14 | 0.01248006 | 0.57451833 |
| -0.157204486 | cg01348584 | RADIL       | 7  | 6.66E-12   | 0.80832951 |
| -0.129234744 | cg04105416 | RADIL       | 7  | 3.79E-14   | 0.7575391  |
| -0.161085303 | cg22283115 | RADIL       | 7  | 6.57E-15   | 0.83598074 |
| -0.198274211 | cg01363736 | RALGAPB     | 20 | 4.27E-08   | 0.84575647 |
| -0.154760403 | cg18361425 | RAMP1       | 2  | 0.00029301 | 0.33009509 |
| -0.101792139 | cg07213181 | RAMP1       | 2  | 0.00578845 | 0.43845356 |
| -0.124858706 | cg14819160 | RAMP1       | 2  | 0.0001657  | 0.47552163 |
| -0.240436271 | cg22396755 | RAP1GAP;RA  | 1  | 4.33E-05   | 0.28387166 |
| -0.197023455 | cg10038867 | RAP1GAP;RA  | 1  | 5.28E-05   | 0.5446628  |
| -0.161464766 | cg18553223 | RAP1GAP2;R  | 17 | 0.01355135 | 0.66212077 |
| -0.139155692 | cg11869193 | RAP1GAP2;R  | 17 | 4.45E-05   | 0.74934051 |
| -0.120187216 | cg13784312 | RAPGEF1     | 9  | 0.00033269 | 0.80517686 |
| -0.101714328 | cg13555415 | RAPGEF1;RAI | 9  | 1.79E-09   | 0.83957517 |
| -0.110023955 | cg01811815 | RASA3       | 13 | 0.00488158 | 0.7852406  |
| -0.14739696  | cg21749794 | RASA3       | 13 | 2.10E-07   | 0.75955233 |
| -0.120990844 | cg11686792 | RASA3       | 13 | 0.00099262 | 0.62227929 |
| -0.114818846 | cg24701606 | RASA3       | 13 | 2.82E-06   | 0.75488128 |
| -0.107101782 | cg05266142 | RASA3       | 13 | 4.79E-06   | 0.74073526 |
| -0.104829641 | cg24126698 | RASA3       | 13 | 0.00018093 | 0.46177998 |
| -0.211645296 | cg04493793 | RASGRF2     | 5  | 1.19E-09   | 0.79630644 |
| -0.156273095 | cg15335334 | RECQL5;LOC  | 17 | 6.04E-06   | 0.49782051 |
| -0.144556357 | cg26870936 | RECQL5;LOC  | 17 | 2.23E-12   | 0.45429424 |
| -0.135801196 | cg05679403 | RELL1;RELL1 | 4  | 8.42E-09   | 0.79526811 |
| -0.127481822 | cg04212651 | RFPL4B      | 6  | 0.0001639  | 0.74965867 |
| -0.111370711 | cg11184109 | RFT1        | 3  | 0.01322646 | 0.55268132 |
| -0.11026947  | cg01336231 | RFTN1       | 3  | 0.00055794 | 0.6204628  |
| -0.19253015  | cg01766396 | RFTN2       | 2  | 8.91E-08   | 0.45976026 |
| -0.107431887 | cg02874031 | RFX4        | 12 | 0.00098916 | 0.71637275 |
| -0.395283933 | cg00450784 | RFX4        | 12 | 9.02E-05   | 0.69410528 |
| -0.186571567 | cg18075315 | RFX4        | 12 | 0.00022156 | 0.52437501 |
| -0.144570557 | cg17851046 | RFX4        | 12 | 0.00053308 | 0.45741117 |
| -0.125865482 | cg20896113 | RFX4;RFX4   | 12 | 5.34E-05   | 0.52507978 |
| -0.123195765 | cg14819229 | RGMA;RGM/   | 15 | 5.75E-05   | 0.81447153 |
| -0.120431469 | cg01919885 | RGS12;RGS1  | 4  | 0.00226975 | 0.80954534 |
| -0.113186207 | cg18127398 | RGS6        | 14 | 0.00021132 | 0.4988206  |
| -0.159308721 | cg03054541 | RIC3;RIC3   | 11 | 5.96E-10   | 0.73674422 |
| -0.104405563 | cg06002952 | RICS        | 11 | 0.0010614  | 0.44582794 |
| -0.171959357 | cg18393905 | RICTOR      | 5  | 1.76E-05   | 0.83352799 |
| -0.112179595 | cg17556421 | RIMBP2      | 12 | 0.00050889 | 0.70085193 |
| -0.100105346 | cg10612692 | RIMBP2      | 12 | 2.07E-09   | 0.53432634 |
| -0.108927191 | cg20934105 | RIN3        | 14 | 8.66E-07   | 0.47769539 |
| -0.10176537  | cg25992382 | RIN3        | 14 | 5.42E-07   | 0.43108184 |
| -0.120186245 | cg07965041 | RINL        | 19 | 1.30E-05   | 0.61347657 |
| -0.118337289 | cg08776014 | RIPK4       | 21 | 7.40E-06   | 0.79223269 |



|               |            |             |    |            |            |
|---------------|------------|-------------|----|------------|------------|
| -0.214735469  | cg00085061 | RIPK4       | 21 | 2.97E-09   | 0.81384196 |
| -0.186306124  | cg27417606 | RNASE13     | 14 | 0.00025367 | 0.58956234 |
| -0.117401106  | cg06073041 | RNF14       | 5  | 0.00032272 | 0.79371434 |
| -0.106864996  | cg12745289 | RNF19B;RNF  | 1  | 5.60E-06   | 0.6152433  |
| -0.143057445  | cg18196453 | RNF217      | 6  | 6.00E-06   | 0.5297344  |
| -0.179274344  | cg08147563 | ROBO1;ROBO  | 3  | 8.77E-07   | 0.61588618 |
| -0.179680057  | cg14216252 | ROR1;ROR1   | 1  | 0.00030956 | 0.51213859 |
| -0.242871715  | cg25839727 | ROR1;ROR1   | 1  | 0.00055767 | 0.59442839 |
| -0.165129808  | cg13300480 | ROR1;ROR1   | 1  | 1.71E-06   | 0.32518576 |
| -0.138936891  | cg20021790 | RPH3AL      | 17 | 8.04E-07   | 0.37515824 |
| -0.124897164  | cg15609308 | RPIA        | 2  | 3.06E-13   | 0.52153086 |
| -0.157864664  | cg11407989 | RPL13AP17;M | 7  | 5.38E-11   | 0.62112617 |
| -0.133510897  | cg09226288 | RPL23AP82;F | 22 | 5.56E-10   | 0.5329611  |
| -0.120699032  | cg00278517 | RPS6KA2     | 6  | 0.00073942 | 0.71639138 |
| -0.10733207   | cg24327522 | RPTOR;RPTO  | 17 | 0.00657577 | 0.5409808  |
| -0.144267761  | cg18951390 | RPTOR;RPTO  | 17 | 1.43E-06   | 0.75024701 |
| -0.116694823  | cg16565901 | RPTOR;RPTO  | 17 | 3.46E-09   | 0.76198986 |
| -0.126321028  | cg06412669 | RPTOR;RPTO  | 17 | 1.30E-09   | 0.73692375 |
| -0.133301352  | cg25902229 | RPTOR;RPTO  | 17 | 3.05E-14   | 0.4867909  |
| -0.105779207  | cg09516200 | RPTOR;RPTO  | 17 | 2.70E-09   | 0.62468496 |
| -0.138732991  | cg24899545 | RREB1;RREB  | 6  | 1.29E-06   | 0.61424372 |
| -0.104131567  | cg04935109 | RTP4        | 3  | 0.00334001 | 0.52642353 |
| -0.106808239  | cg14656093 | RUNX3;RUNX  | 1  | 1.18E-06   | 0.51694483 |
| -0.114294453  | cg26861995 | RUVBL1      | 3  | 1.20E-05   | 0.52269499 |
| -0.1111290957 | cg14545975 | RXRA        | 9  | 4.42E-05   | 0.67119426 |
| -0.104612957  | cg14236758 | RXRA        | 9  | 0.00471424 | 0.79066092 |
| -0.114901897  | cg02127980 | RXRA        | 9  | 0.00090811 | 0.72926624 |
| -0.107122884  | cg19825483 | RYR2        | 1  | 4.39E-05   | 0.48229537 |
| -0.142564961  | cg00299070 | RYR2        | 1  | 2.82E-13   | 0.54862144 |
| -0.102071813  | cg20847746 | S100A13;S10 | 1  | 0.00944731 | 0.38753266 |
| -0.134298507  | cg10224088 | S100A13;S10 | 1  | 1.87E-17   | 0.60329411 |
| -0.224001346  | cg14333338 | S100B       | 21 | 5.04E-06   | 0.35690284 |
| -0.168536339  | cg00025591 | S100B       | 21 | 1.88E-05   | 0.66499509 |
| -0.100204064  | cg18576206 | SAMM50      | 22 | 0.00075546 | 0.76832397 |
| -0.119026382  | cg13951664 | SAMSN1      | 21 | 3.78E-07   | 0.28484894 |
| -0.100982422  | cg13717350 | SARDH;SARD  | 9  | 1.31E-07   | 0.76190848 |
| -0.226515039  | cg25513433 | SBF2        | 11 | 0.00038226 | 0.52056612 |
| -0.20219915   | cg23698269 | SBF2        | 11 | 2.86E-05   | 0.69058224 |
| -0.133728175  | cg08286551 | SBNO2       | 19 | 0.00100655 | 0.55263155 |
| -0.129471847  | cg26529239 | SCAND3      | 6  | 0.00018573 | 0.72687891 |
| -0.203168287  | cg12895179 | SCARF2;SCAF | 22 | 0.00251274 | 0.42335187 |
| -0.123592788  | cg04097078 | SCARF2;SCAF | 22 | 0.00160346 | 0.79991892 |
| -0.106245567  | cg04881673 | SCD5;SCD5   | 4  | 2.14E-05   | 0.6991755  |
| -0.169177878  | cg19752565 | SCN7A       | 2  | 4.09E-08   | 0.47632945 |
| -0.11732331   | cg26842303 | SDC2        | 8  | 6.67E-05   | 0.65110767 |
| -0.113201333  | cg23166773 | SDCCAG8;AK  | 1  | 2.72E-10   | 0.78450853 |

|              |            |             |    |            |            |
|--------------|------------|-------------|----|------------|------------|
| -0.101622325 | cg02491557 | SDK1        | 7  | 8.45E-13   | 0.53246155 |
| -0.115475961 | cg16339286 | SDK1        | 7  | 1.05E-13   | 0.43552208 |
| -0.108878362 | cg04609841 | SDK1        | 7  | 2.48E-18   | 0.66446074 |
| -0.102789297 | cg14295306 | SDK2        | 17 | 7.36E-09   | 0.73596157 |
| -0.14467834  | cg08413419 | SECTM1      | 17 | 3.27E-08   | 0.47197121 |
| -0.170121594 | cg09811393 | SEMA3B;SEM  | 3  | 0.01397779 | 0.73615046 |
| -0.121793578 | cg10819708 | SEMA4B      | 15 | 6.33E-07   | 0.38298488 |
| -0.107980615 | cg18241962 | SEPT9;SEPT9 | 17 | 5.72E-05   | 0.4481165  |
| -0.121289645 | cg02277530 | SEPT9;SEPT9 | 17 | 0.00020234 | 0.4466554  |
| -0.17549963  | cg03236137 | SEPT9;SEPT9 | 17 | 4.31E-11   | 0.53550588 |
| -0.151531393 | cg07827420 | SEPT9;SEPT9 | 17 | 7.27E-07   | 0.56720356 |
| -0.103577791 | cg00871371 | SEPT9;SEPT9 | 17 | 8.05E-06   | 0.68612931 |
| -0.19099278  | cg26415789 | SEPT9;SEPT9 | 17 | 8.74E-06   | 0.66963733 |
| -0.119895461 | cg15229994 | SEPT9;SEPT9 | 17 | 0.00034191 | 0.62799706 |
| -0.105699507 | cg14773822 | SEPT9;SEPT9 | 17 | 0.00016088 | 0.63201799 |
| -0.108133196 | cg04548336 | SEPT9       | 17 | 0.00040191 | 0.55502744 |
| -0.203194365 | cg06677021 | SERINC5     | 5  | 0.00018244 | 0.78791769 |
| -0.104490978 | cg23374863 | SERPINA12;S | 14 | 4.04E-08   | 0.30270149 |
| -0.127578724 | cg07348591 | SERPINE2;SE | 2  | 2.53E-06   | 0.84557992 |
| -0.101538492 | cg08305533 | SFI1;SFI1   | 22 | 6.14E-09   | 0.32575916 |
| -0.272200878 | cg11956866 | SFI1;SFI1   | 22 | 3.87E-09   | 0.55157001 |
| -0.13150772  | cg16498741 | SFRP1       | 8  | 7.24E-06   | 0.49726516 |
| -0.238075384 | cg02154585 | SFRP1       | 8  | 2.17E-10   | 0.73179228 |
| -0.118944378 | cg22499893 | SFRS13A;SFR | 1  | 0.00663335 | 0.60210471 |
| -0.140017428 | cg25713214 | SFXN4       | 10 | 7.10E-06   | 0.64392772 |
| -0.125478358 | cg23375247 | SGTA        | 19 | 9.02E-06   | 0.58261656 |
| -0.225276168 | cg24544047 | SH2B2       | 7  | 0.00073582 | 0.80549611 |
| -0.205837342 | cg16880396 | SH2B2       | 7  | 4.76E-05   | 0.70846368 |
| -0.122852509 | cg03802185 | SH2B2       | 7  | 3.12E-09   | 0.78337918 |
| -0.11995236  | cg24545967 | SH2D3C;SH2  | 9  | 3.48E-05   | 0.63458011 |
| -0.128382047 | cg24170085 | SH3BP5;SH3I | 3  | 5.22E-13   | 0.38134172 |
| -0.163155476 | cg02030270 | SH3GL3;SH3C | 15 | 8.57E-12   | 0.74062844 |
| -0.110220969 | cg03880642 | SH3PXD2A    | 10 | 0.0029547  | 0.5060842  |
| -0.1284244   | cg05696969 | SH3RF2      | 5  | 0.00019457 | 0.62116755 |
| -0.172720627 | cg14795555 | SH3RF3      | 2  | 2.67E-08   | 0.35749575 |
| -0.171665294 | cg09548638 | SH3TC2      | 5  | 0.0071501  | 0.43273949 |
| -0.119942331 | cg27643147 | SHANK2      | 11 | 2.79E-08   | 0.46384561 |
| -0.12368675  | cg06868991 | SHANK2      | 11 | 1.04E-14   | 0.73514093 |
| -0.106003899 | cg27112585 | SHANK2;SHA  | 11 | 1.70E-06   | 0.47180822 |
| -0.105424712 | cg00303223 | SHOX2;SHOX  | 3  | 0.00028948 | 0.7101698  |
| -0.135151123 | cg16609957 | SHROOM1;SI  | 5  | 6.19E-08   | 0.763374   |
| -0.114514365 | cg12979844 | SIAH3       | 13 | 1.74E-09   | 0.33235593 |
| -0.104567025 | cg11803771 | SIPA1;SIPA1 | 11 | 0.00225349 | 0.81706449 |
| -0.140981001 | cg13395086 | SIPA1;SIPA1 | 11 | 0.00037293 | 0.70951967 |
| -0.102566334 | cg07386008 | SIPA1L2     | 1  | 2.60E-09   | 0.57287415 |
| -0.112798524 | cg25104437 | SIX3        | 2  | 0.00068158 | 0.5269704  |

|              |            |              |    |            |            |
|--------------|------------|--------------|----|------------|------------|
| -0.105838839 | cg02372786 | SIX3         | 2  | 4.71E-05   | 0.42369503 |
| -0.107722282 | cg11126767 | SIX6         | 14 | 3.10E-07   | 0.34103783 |
| -0.1995545   | cg18997983 | SLC12A7      | 5  | 0.00637511 | 0.84789403 |
| -0.167319298 | cg17221813 | SLC17A9      | 20 | 1.70E-06   | 0.81297913 |
| -0.127437639 | cg13844463 | SLC1A2       | 11 | 1.79E-05   | 0.60806975 |
| -0.106177656 | cg10159951 | SLC1A2       | 11 | 0.00623781 | 0.55863692 |
| -0.100910789 | cg08258650 | SLC1A2       | 11 | 0.00096925 | 0.68926642 |
| -0.126394988 | cg12882392 | SLC22A11     | 11 | 1.77E-06   | 0.66690984 |
| -0.111799712 | cg01822289 | SLC22A11     | 11 | 1.58E-08   | 0.66811603 |
| -0.115974852 | cg00552892 | SLC23A3;SLC  | 2  | 0.00136589 | 0.46718952 |
| -0.112071397 | cg03493774 | SLC24A4;SLC  | 14 | 3.31E-12   | 0.40909916 |
| -0.139643614 | cg08244301 | SLC27A1      | 19 | 3.45E-06   | 0.39775831 |
| -0.12667044  | cg15089806 | SLC2A1       | 1  | 2.27E-06   | 0.47223015 |
| -0.114424205 | cg27391816 | SLC35E2      | 1  | 0.00797318 | 0.61784655 |
| -0.107218841 | cg15215033 | SLC38A10;SL  | 17 | 2.97E-05   | 0.46465605 |
| -0.115586582 | cg27062060 | SLC38A10;SL  | 17 | 2.67E-07   | 0.56341379 |
| -0.175576656 | cg25692139 | SLC38A10;SL  | 17 | 3.70E-07   | 0.56116996 |
| -0.131420384 | cg16710042 | SLC38A11     | 2  | 0.00033631 | 0.57009894 |
| -0.12073237  | cg27025137 | SLC39A11;SL  | 17 | 4.66E-07   | 0.73821159 |
| -0.263270924 | cg05200373 | SLC39A7;SLC  | 6  | 7.36E-06   | 0.5325204  |
| -0.171494845 | cg21580456 | SLC41A3;SLC  | 3  | 7.86E-09   | 0.66195358 |
| -0.153804521 | cg04204452 | SLC43A2      | 17 | 0.00421572 | 0.77654324 |
| -0.107248685 | cg23691006 | SLC43A2      | 17 | 1.25E-06   | 0.57068708 |
| -0.158050725 | cg19880947 | SLC43A2      | 17 | 3.36E-07   | 0.73981595 |
| -0.127491977 | cg22284058 | SLC45A4      | 8  | 0.00741049 | 0.72592413 |
| -0.114578357 | cg03988700 | SLC6A3       | 5  | 1.09E-06   | 0.6140688  |
| -0.107815158 | cg15454698 | SLC6A6;SLC6  | 3  | 0.03033403 | 0.53963851 |
| -0.127287653 | cg05327789 | SLC04A1      | 20 | 2.27E-07   | 0.75713649 |
| -0.105072362 | cg26164234 | SLIT1        | 10 | 4.39E-07   | 0.60302973 |
| -0.130500717 | cg06569542 | SLIT1        | 10 | 1.85E-12   | 0.66204256 |
| -0.210051867 | cg17229698 | SLIT3        | 5  | 0.002292   | 0.6019217  |
| -0.107627286 | cg05906024 | SLIT3        | 5  | 0.0003501  | 0.64984367 |
| -0.167495008 | cg08712336 | SLIT3        | 5  | 3.57E-13   | 0.7510972  |
| -0.117253153 | cg13008977 | SLIT3        | 5  | 7.83E-09   | 0.67435519 |
| -0.101930351 | cg16679297 | SLIT3        | 5  | 5.53E-15   | 0.78664615 |
| -0.102696236 | cg11855741 | SLIT3;MIR58! | 5  | 0.0003676  | 0.44915051 |
| -0.177180214 | cg02184281 | SMAD7        | 18 | 1.79E-06   | 0.78103344 |
| -0.179791548 | cg13783238 | SMC4;MIR15   | 3  | 2.07E-07   | 0.71892771 |
| -0.176769195 | cg19926852 | SMOC2;SMO    | 6  | 1.66E-06   | 0.82689147 |
| -0.103226757 | cg04967737 | SMOC2;SMO    | 6  | 0.00198908 | 0.64449245 |
| -0.285077593 | cg17297775 | SMOC2;SMO    | 6  | 6.44E-06   | 0.74111833 |
| -0.269553364 | cg07250916 | SMOC2;SMO    | 6  | 2.91E-05   | 0.74782004 |
| -0.165561208 | cg24114708 | SMOC2;SMO    | 6  | 2.64E-05   | 0.63686819 |
| -0.134608406 | cg22796363 | SMYD2        | 1  | 8.84E-13   | 0.74317869 |
| -0.386559738 | cg22171145 | SND1         | 7  | 0.00043422 | 0.45557518 |
| -0.356636686 | cg15889424 | SNORA80;UR   | 21 | 1.17E-05   | 0.59843401 |

|              |            |                 |    |            |            |
|--------------|------------|-----------------|----|------------|------------|
| -0.355185099 | cg22407942 | SNORD93         | 7  | 0.0070672  | 0.50545457 |
| -0.330377609 | cg08330349 | SNX20;SNX20     | 16 | 5.90E-07   | 0.68409361 |
| -0.31945298  | cg18515303 | SORCS1;SORCS1   | 10 | 1.65E-05   | 0.44255806 |
| -0.315070812 | cg18658556 | SORCS2          | 4  | 0.00010459 | 0.55570219 |
| -0.310694365 | cg03166265 | SORCS2          | 4  | 0.0053032  | 0.6798248  |
| -0.304245491 | cg09789721 | SORCS2          | 4  | 4.56E-05   | 0.7223162  |
| -0.302424915 | cg12716837 | SORCS2          | 4  | 0.00039395 | 0.45638262 |
| -0.300918235 | cg18803251 | SORCS2          | 4  | 2.69E-07   | 0.8410127  |
| -0.298938587 | cg10879992 | SORCS2          | 4  | 4.69E-11   | 0.29874301 |
| -0.296661738 | cg06875488 | SORCS2          | 4  | 5.66E-10   | 0.61792899 |
| -0.29464198  | cg19593680 | SORCS2          | 4  | 2.80E-07   | 0.53542326 |
| -0.293860408 | cg13318771 | SORCS2          | 4  | 1.54E-13   | 0.46105201 |
| -0.288608307 | cg14180415 | SORCS2          | 4  | 2.44E-08   | 0.61253811 |
| -0.287322718 | cg21254939 | SORCS2          | 4  | 2.57E-11   | 0.33296875 |
| -0.284888544 | cg15970640 | SORCS2          | 4  | 0.00611237 | 0.79854998 |
| -0.282603999 | cg14084689 | SORCS2          | 4  | 1.50E-12   | 0.46343064 |
| -0.281506883 | cg06173889 | SOX11;SOX11     | 2  | 2.95E-06   | 0.40864048 |
| -0.278563182 | cg11864574 | SPAG6;SPAG6     | 10 | 0.00051063 | 0.59114033 |
| -0.277719638 | cg25008858 | SPEG            | 2  | 0.0076266  | 0.57597723 |
| -0.269413047 | cg11841522 | SPEG            | 2  | 1.12E-06   | 0.62870008 |
| -0.265809256 | cg07110801 | SPG7            | 16 | 6.03E-06   | 0.49051577 |
| -0.263243742 | cg26691434 | SPN;SPN         | 16 | 0.00124966 | 0.73261922 |
| -0.262062035 | cg01138020 | SPNS3           | 17 | 4.30E-06   | 0.44833886 |
| -0.261531959 | cg20551922 | SPNS3           | 17 | 3.14E-08   | 0.57831054 |
| -0.25846234  | cg21582240 | SPOCK1          | 5  | 3.71E-08   | 0.48220954 |
| -0.257816556 | cg08651590 | SPRED2;SPRED2   | 2  | 0.00854248 | 0.46511842 |
| -0.255749983 | cg19809157 | SPSB1           | 1  | 1.86E-06   | 0.49655747 |
| -0.254135849 | cg20017590 | SPTBN1;SPTEN1   | 2  | 2.22E-09   | 0.84456285 |
| -0.253575599 | cg15602548 | SPTBN1;SPTEN1   | 2  | 5.99E-05   | 0.59578357 |
| -0.252241611 | cg23630380 | SRCIN1          | 17 | 4.22E-07   | 0.42983635 |
| -0.252078571 | cg01177100 | SRGAP3;SRGAP3   | 3  | 1.12E-05   | 0.76678906 |
| -0.249727032 | cg18278184 | SRGN            | 10 | 0.00013366 | 0.49961461 |
| -0.249311302 | cg09890699 | SSBP3;SSBP3     | 1  | 4.53E-05   | 0.69805937 |
| -0.248739786 | cg04561731 | SSBP3;SSBP3     | 1  | 6.98E-09   | 0.70116875 |
| -0.245461802 | cg19963589 | SSBP3;SSBP3     | 1  | 0.00197917 | 0.74819575 |
| -0.244935281 | cg08644381 | SSPO            | 7  | 5.18E-11   | 0.5211633  |
| -0.244563053 | cg04273299 | ST3GAL1;ST3GAL1 | 8  | 1.83E-10   | 0.82213731 |
| -0.242133878 | cg13072717 | ST6GAL1;ST6GAL1 | 3  | 2.24E-10   | 0.55764059 |
| -0.241459482 | cg15588258 | ST6GALNAC1      | 17 | 1.57E-08   | 0.62241983 |
| -0.241034307 | cg25312440 | ST6GALNAC3      | 1  | 1.04E-06   | 0.78873541 |
| -0.23893138  | cg05787129 | ST8SIA2         | 15 | 1.90E-06   | 0.55883311 |
| -0.237675019 | cg25498969 | STAG1           | 3  | 0.00093352 | 0.5915203  |
| -0.236524778 | cg09632271 | STAP1           | 4  | 3.80E-15   | 0.64270544 |
| -0.235623952 | cg20173260 | STAT1;STAT1     | 2  | 0.00278722 | 0.52720821 |
| -0.235562112 | cg19728382 | STC2            | 5  | 5.82E-06   | 0.436894   |
| -0.235562022 | cg14394126 | STIM2;STIM2     | 4  | 0.00071541 | 0.70751183 |

|              |            |             |    |            |            |
|--------------|------------|-------------|----|------------|------------|
| -0.234322131 | cg09110502 | STK24       | 13 | 0.00016329 | 0.72400999 |
| -0.233863953 | cg05459190 | STK32C      | 10 | 1.07E-06   | 0.75257796 |
| -0.233168739 | cg07400503 | STK32C      | 10 | 8.53E-06   | 0.65415393 |
| -0.232803526 | cg03766264 | STK38L      | 12 | 0.00706155 | 0.47620534 |
| -0.231887377 | cg07240557 | STK38L      | 12 | 7.87E-06   | 0.37428866 |
| -0.231436016 | cg23433370 | STK38L      | 12 | 8.02E-11   | 0.62644066 |
| -0.231335741 | cg05798664 | STK40       | 1  | 4.06E-05   | 0.42161533 |
| -0.230601165 | cg06631999 | STMN1       | 1  | 0.0005616  | 0.63012539 |
| -0.230449887 | cg24222546 | STRA6;STRA6 | 15 | 3.48E-07   | 0.43380338 |
| -0.230234165 | cg27641801 | STX18       | 4  | 0.00120414 | 0.69863454 |
| -0.22947991  | cg20663219 | STX1A;STX1A | 7  | 1.72E-09   | 0.43976748 |
| -0.22913152  | cg08493590 | SUPT3H      | 6  | 1.23E-05   | 0.79082394 |
| -0.228747299 | cg05814312 | SVIL;SVIL   | 10 | 0.00164302 | 0.44702932 |
| -0.227831894 | cg23646360 | SYCP2L      | 6  | 0.00047149 | 0.37635482 |
| -0.226715494 | cg00971175 | SYDE1       | 19 | 0.00080936 | 0.75888149 |
| -0.224641483 | cg04078115 | SYN3;SYN3;S | 22 | 2.41E-07   | 0.48902335 |
| -0.224023087 | cg20476019 | SYN3;SYN3;S | 22 | 0.00367546 | 0.70205107 |
| -0.223857344 | cg24080529 | SYN3;TIMP3; | 22 | 6.76E-05   | 0.48176297 |
| -0.223273321 | cg08130912 | SYNE2;SYNE2 | 14 | 1.01E-07   | 0.44059692 |
| -0.221853688 | cg14533068 | SYNJ2       | 6  | 2.07E-05   | 0.52530689 |
| -0.22168494  | cg27039501 | SYNPO;SYNP  | 5  | 4.77E-06   | 0.69318226 |
| -0.221438015 | cg27550918 | SYNPO2L;SYN | 10 | 4.87E-15   | 0.62940027 |
| -0.220009606 | cg24720849 | SYT8        | 11 | 1.17E-05   | 0.56786468 |
| -0.219588583 | cg26186546 | TACC2;TACC2 | 10 | 3.27E-07   | 0.74189274 |
| -0.218916603 | cg27143703 | TBC1D16     | 17 | 1.30E-09   | 0.60586251 |
| -0.218770822 | cg03837680 | TBC1D16     | 17 | 1.13E-09   | 0.39055016 |
| -0.21817672  | cg16461139 | TBC1D16     | 17 | 0.00247046 | 0.66246195 |
| -0.21810791  | cg04157865 | TBC1D16     | 17 | 1.23E-06   | 0.71738477 |
| -0.217891464 | cg16030878 | TBC1D16     | 17 | 1.09E-06   | 0.76964324 |
| -0.217799392 | cg06119477 | TBC1D20     | 20 | 5.59E-09   | 0.38826956 |
| -0.217200604 | cg09692364 | TBC1D4      | 13 | 0.00113852 | 0.61443709 |
| -0.216304047 | cg02768197 | TBCD        | 17 | 0.00102403 | 0.65171624 |
| -0.213406054 | cg00830755 | TBCD        | 17 | 0.00023281 | 0.74919189 |
| -0.212934975 | cg13304638 | TBCD        | 17 | 8.82E-07   | 0.61785204 |
| -0.212907399 | cg06218079 | TBCD        | 17 | 2.64E-08   | 0.44105831 |
| -0.212607184 | cg02362103 | TBX15       | 1  | 2.26E-07   | 0.28200935 |
| -0.212566138 | cg23371746 | TBX15       | 1  | 1.86E-08   | 0.28801428 |
| -0.212100522 | cg18002447 | TBX2        | 17 | 7.64E-08   | 0.71326379 |
| -0.210708949 | cg01438365 | TBX2        | 17 | 2.93E-08   | 0.7077966  |
| -0.21014519  | cg27027242 | TBX2        | 17 | 0.00037097 | 0.77691954 |
| -0.209605452 | cg05477823 | TBX2        | 17 | 0.00415394 | 0.46185811 |
| -0.209401676 | cg11631427 | TBX2        | 17 | 0.03308433 | 0.75748055 |
| -0.208873006 | cg21389753 | TBX2        | 17 | 5.26E-06   | 0.31902252 |
| -0.208660275 | cg03753391 | TBX2        | 17 | 0.01324265 | 0.67653378 |
| -0.208533287 | cg27470066 | TBX2        | 17 | 9.05E-05   | 0.57482081 |
| -0.206611923 | cg26660800 | TBX2        | 17 | 1.27E-05   | 0.50664641 |

|              |            |             |    |            |            |
|--------------|------------|-------------|----|------------|------------|
| -0.206538379 | cg26983835 | TBX2        | 17 | 3.54E-05   | 0.52178282 |
| -0.206418797 | cg07095230 | TBX2        | 17 | 9.33E-08   | 0.64804702 |
| -0.206415833 | cg06211872 | TBX3;TBX3   | 12 | 5.22E-08   | 0.42843806 |
| -0.206120036 | cg09413529 | TBX3;TBX3   | 12 | 0.00044236 | 0.58595537 |
| -0.2055748   | cg09053536 | TBX3;TBX3   | 12 | 0.00156961 | 0.80008779 |
| -0.204790059 | cg18161956 | TBX3;TBX3   | 12 | 0.00436388 | 0.38400709 |
| -0.204624695 | cg13829104 | TBX3;TBX3   | 12 | 0.00061188 | 0.66479656 |
| -0.204576917 | cg11246938 | TBX3;TBX3   | 12 | 0.00025337 | 0.71759543 |
| -0.2042418   | cg16277169 | TBX3;TBX3   | 12 | 0.0068392  | 0.70695694 |
| -0.20273969  | cg01078446 | TBX3;TBX3   | 12 | 2.20E-05   | 0.59995663 |
| -0.202648682 | cg13930596 | TBX3;TBX3   | 12 | 1.45E-05   | 0.70416636 |
| -0.202057539 | cg22635491 | TBX3;TBX3   | 12 | 1.04E-06   | 0.60833426 |
| -0.201358744 | cg16406892 | TBX3;TBX3   | 12 | 1.37E-06   | 0.73208324 |
| -0.200897171 | cg03843000 | TBX5;TBX5   | 12 | 7.29E-16   | 0.22381383 |
| -0.200731861 | cg14431443 | TBX5;TBX5   | 12 | 1.17E-09   | 0.37811379 |
| -0.199878363 | cg05929882 | TBX5;TBX5   | 12 | 7.23E-13   | 0.28123937 |
| -0.199752905 | cg17645823 | TBX5;TBX5   | 12 | 5.39E-12   | 0.39243564 |
| -0.199748129 | cg12670347 | TBX5;TBX5   | 12 | 5.68E-15   | 0.67011244 |
| -0.199327909 | cg16458436 | TBX5;TBX5   | 12 | 1.61E-16   | 0.62506385 |
| -0.198987549 | cg19290410 | TBX5;TBX5   | 12 | 5.11E-13   | 0.4401457  |
| -0.198590772 | cg23827572 | TBX5;TBX5   | 12 | 8.59E-14   | 0.47236797 |
| -0.198128424 | cg05769349 | TBX5;TBX5   | 12 | 1.35E-18   | 0.51541944 |
| -0.197851308 | cg10281002 | TBX5;TBX5   | 12 | 1.27E-13   | 0.58910094 |
| -0.197221682 | cg16559598 | TBX5;TBX5   | 12 | 5.34E-20   | 0.65928834 |
| -0.196990681 | cg05555207 | TBX5;TBX5   | 12 | 1.78E-19   | 0.71806444 |
| -0.196851726 | cg06911121 | TBX5;TBX5   | 12 | 6.65E-19   | 0.68556119 |
| -0.196432928 | cg26196480 | TBX5;TBX5   | 12 | 5.75E-18   | 0.76725928 |
| -0.196301882 | cg14264795 | TBX5;TBX5;T | 12 | 1.82E-05   | 0.7786699  |
| -0.196211115 | cg08318726 | TBX5;TBX5;T | 12 | 8.97E-14   | 0.47728247 |
| -0.196114049 | cg21611810 | TBX5;TBX5;T | 12 | 0.004883   | 0.28029621 |
| -0.19607922  | cg08900101 | TBX5;TBX5;T | 12 | 1.74E-07   | 0.28039184 |
| -0.195914956 | cg22628281 | TBX5;TBX5;T | 12 | 0.00052745 | 0.3099927  |
| -0.195109193 | cg25556579 | TBX5;TBX5;T | 12 | 4.67E-10   | 0.72730822 |
| -0.19448239  | cg00642359 | TBX5;TBX5;T | 12 | 1.49E-06   | 0.44163033 |
| -0.194124219 | cg17462200 | TBX5;TBX5;T | 12 | 0.00020637 | 0.36911616 |
| -0.193402448 | cg02712224 | TBX5;TBX5;T | 12 | 4.02E-07   | 0.33258478 |
| -0.192656686 | cg05065572 | TBX5;TBX5;T | 12 | 5.81E-08   | 0.33183446 |
| -0.19261873  | cg00590029 | TBX5;TBX5;T | 12 | 3.08E-05   | 0.54154997 |
| -0.192263732 | cg20099830 | TBX5;TBX5;T | 12 | 1.44E-05   | 0.52304591 |
| -0.192026632 | cg11841394 | TBX5;TBX5;T | 12 | 9.04E-06   | 0.44364619 |
| -0.191990773 | cg27072153 | TBX5;TBX5;T | 12 | 3.89E-05   | 0.40275146 |
| -0.191558765 | cg21907579 | TBX5;TBX5;T | 12 | 1.19E-09   | 0.45560376 |
| -0.191238865 | cg06717565 | TBX5;TBX5;T | 12 | 1.11E-15   | 0.6552129  |
| -0.191023661 | cg14126466 | TBX5;TBX5;T | 12 | 1.15E-16   | 0.82015482 |
| -0.190503463 | cg03877376 | TBX5;TBX5;T | 12 | 2.26E-11   | 0.52018976 |
| -0.190126878 | cg12610207 | TBX5;TBX5;T | 12 | 5.01E-16   | 0.54271028 |

|              |            |             |    |            |            |
|--------------|------------|-------------|----|------------|------------|
| -0.190092011 | cg04562909 | TBX5;TBX5;T | 12 | 5.05E-19   | 0.69043007 |
| -0.189685244 | cg11357746 | TBX5;TBX5;T | 12 | 2.79E-16   | 0.62856312 |
| -0.189646462 | cg08184159 | TBX5;TBX5;T | 12 | 1.61E-19   | 0.73085967 |
| -0.189253213 | cg03559073 | TBX5;TBX5;T | 12 | 1.30E-15   | 0.63219781 |
| -0.189030405 | cg17554126 | TBX5;TBX5;T | 12 | 1.26E-16   | 0.75783643 |
| -0.188287813 | cg25399352 | TBX5;TBX5;T | 12 | 1.52E-18   | 0.74610306 |
| -0.187319654 | cg18689332 | TBX5;TBX5;T | 12 | 1.34E-13   | 0.67312493 |
| -0.187310806 | cg07658357 | TBX5;TBX5;T | 12 | 8.22E-17   | 0.76847399 |
| -0.187280605 | cg22929859 | TBX5;TBX5;T | 12 | 1.27E-20   | 0.77449629 |
| -0.187250568 | cg06725552 | TBX5;TBX5;T | 12 | 2.48E-18   | 0.78899036 |
| -0.187015323 | cg18006379 | TCERG1L     | 10 | 2.07E-07   | 0.78387223 |
| -0.187001221 | cg12452800 | TCERG1L     | 10 | 7.21E-09   | 0.5580321  |
| -0.186867602 | cg22207584 | TCF7L1      | 2  | 4.79E-09   | 0.61219092 |
| -0.186521566 | cg05235151 | TCP11;TCP11 | 6  | 9.18E-05   | 0.69937577 |
| -0.185987929 | cg04435320 | TCP11L1;TCP | 11 | 3.39E-05   | 0.67172615 |
| -0.185865446 | cg17485717 | TCP11L1;TCP | 11 | 8.55E-07   | 0.73363544 |
| -0.185503215 | cg12399536 | TEAD1       | 11 | 0.00072975 | 0.60679043 |
| -0.185489063 | cg14381919 | TEAD1       | 11 | 0.00171249 | 0.39394943 |
| -0.185325821 | cg08537660 | TEAD1       | 11 | 3.11E-05   | 0.59457733 |
| -0.185223795 | cg27240158 | TEAD1       | 11 | 0.00262454 | 0.58276807 |
| -0.184637978 | cg15722533 | TEAD1       | 11 | 4.07E-05   | 0.62979334 |
| -0.184549349 | cg14665901 | TEAD1       | 11 | 2.31E-08   | 0.61371054 |
| -0.184409626 | cg01039401 | TEAD4;TEAD  | 12 | 1.42E-08   | 0.64887167 |
| -0.184250843 | cg27152208 | TFAP2A      | 6  | 5.12E-06   | 0.33466576 |
| -0.183859125 | cg24286789 | TFAP2A      | 6  | 2.90E-11   | 0.67884254 |
| -0.183704051 | cg26149682 | TFAP2A      | 6  | 4.46E-14   | 0.53090781 |
| -0.182536018 | cg14683017 | TFAP2A      | 6  | 9.99E-11   | 0.64763604 |
| -0.182525546 | cg10899301 | TFAP2A;TFAF | 6  | 6.34E-07   | 0.3862318  |
| -0.182515311 | cg13298147 | TFAP2A;TFAF | 6  | 1.23E-12   | 0.56140511 |
| -0.182163952 | cg24902920 | TFAP2A;TFAF | 6  | 8.88E-09   | 0.43150019 |
| -0.181895066 | cg08178786 | TFAP2A;TFAF | 6  | 2.55E-06   | 0.41278483 |
| -0.181869462 | cg06630455 | TFAP2A;TFAF | 6  | 9.59E-07   | 0.34310801 |
| -0.180863839 | cg21661837 | TFAP2A;TFAF | 6  | 0.00014436 | 0.3101655  |
| -0.18051881  | cg12659952 | TFAP2A;TFAF | 6  | 7.75E-09   | 0.43833848 |
| -0.179875386 | cg16199280 | TFAP2A;TFAF | 6  | 3.77E-12   | 0.4938071  |
| -0.179787193 | cg22315453 | TFAP2A;TFAF | 6  | 8.77E-16   | 0.61601878 |
| -0.179107504 | cg04066190 | TFAP2A;TFAF | 6  | 4.08E-14   | 0.68377509 |
| -0.179094738 | cg17707487 | TFDP1;TFDP1 | 13 | 4.50E-10   | 0.7757581  |
| -0.178657078 | cg21082644 | TFDP1;TFDP1 | 13 | 1.86E-08   | 0.70317209 |
| -0.178332932 | cg21814995 | TGFBR2;TGFI | 3  | 0.00648968 | 0.59453879 |
| -0.177741622 | cg20629315 | THADA;THAL  | 2  | 5.00E-05   | 0.52945941 |
| -0.17770271  | cg21679402 | THAP4       | 2  | 1.86E-06   | 0.79867368 |
| -0.177447542 | cg14627862 | THBS2       | 6  | 0.01552694 | 0.59386779 |
| -0.177352946 | cg16504696 | THEMIS;THEI | 6  | 3.36E-10   | 0.8399921  |
| -0.176998098 | cg05590818 | TLK1;TLK1   | 2  | 0.00033821 | 0.52990582 |
| -0.17655539  | cg23206630 | TLN2        | 15 | 3.37E-06   | 0.4919263  |

|              |            |              |    |            |            |
|--------------|------------|--------------|----|------------|------------|
| -0.17634676  | cg06800962 | TM4SF1       | 3  | 8.09E-06   | 0.40686583 |
| -0.176337181 | cg19056418 | TMC8;TMC6    | 17 | 0.00096631 | 0.63492844 |
| -0.176123256 | cg03190661 | TMC8;TMC6    | 17 | 1.33E-05   | 0.73519175 |
| -0.175896586 | cg00447208 | TMC8;TMC6;   | 17 | 8.04E-06   | 0.63376316 |
| -0.175678312 | cg06630988 | TMEM132B     | 12 | 2.84E-10   | 0.55320233 |
| -0.175138375 | cg19793904 | TMEM132C     | 12 | 0.00024723 | 0.5448982  |
| -0.175022237 | cg02501166 | TMEM132C     | 12 | 2.56E-11   | 0.58940269 |
| -0.174683104 | cg15936861 | TMEM132D     | 12 | 1.27E-08   | 0.50082814 |
| -0.174627644 | cg13799986 | TMEM141      | 9  | 5.86E-05   | 0.55578012 |
| -0.174151484 | cg06000732 | TMEM144      | 4  | 2.74E-05   | 0.82252357 |
| -0.174038554 | cg15685988 | TMEM201;T    | 1  | 9.27E-11   | 0.83441633 |
| -0.173933718 | cg17950169 | TMEM63A      | 1  | 2.03E-08   | 0.32322262 |
| -0.173555589 | cg13672106 | TMEM99       | 17 | 6.24E-05   | 0.71831268 |
| -0.173024013 | cg14918744 | TNFRSF10D    | 8  | 8.26E-11   | 0.60332814 |
| -0.172824965 | cg15526535 | TNFRSF1B     | 1  | 8.82E-08   | 0.45770836 |
| -0.172800324 | cg08048178 | TNK2;TNK2    | 3  | 0.02260876 | 0.84127292 |
| -0.172791675 | cg04923875 | TNR          | 1  | 2.86E-06   | 0.64270266 |
| -0.172771686 | cg14517056 | TNRC18       | 7  | 4.39E-07   | 0.81656227 |
| -0.172446957 | cg01950495 | TPPP         | 5  | 4.22E-05   | 0.49158865 |
| -0.171893143 | cg10177080 | TPPP         | 5  | 3.23E-06   | 0.7702412  |
| -0.171546417 | cg14064762 | TRAF1        | 9  | 3.90E-05   | 0.49998822 |
| -0.171434643 | cg11723904 | TRAP1        | 16 | 0.00024927 | 0.70845974 |
| -0.170743139 | cg24062157 | TRAP1        | 16 | 5.23E-05   | 0.75980378 |
| -0.170468129 | cg24317069 | TRAPPC9;TR   | 8  | 2.42E-07   | 0.81082516 |
| -0.170127031 | cg02528189 | TRAPPC9;TR   | 8  | 2.61E-06   | 0.49811419 |
| -0.169970041 | cg05583014 | TREX1;TREX1  | 3  | 0.00026664 | 0.6326617  |
| -0.169668489 | cg14023589 | TRHDE        | 12 | 1.07E-07   | 0.87492532 |
| -0.16934158  | cg06200244 | TRIB2;TRIB2  | 2  | 1.52E-14   | 0.58512413 |
| -0.169141286 | cg13513229 | TRIM14;TRIM  | 9  | 4.62E-07   | 0.57965232 |
| -0.167377993 | cg09409585 | TRIM27       | 6  | 0.00023648 | 0.66530556 |
| -0.16644879  | cg20986887 | TRIM27       | 6  | 3.27E-08   | 0.69459554 |
| -0.166336196 | cg11389756 | TRIM27       | 6  | 1.28E-05   | 0.45483829 |
| -0.166282662 | cg10179300 | TRIO         | 5  | 1.68E-08   | 0.83093162 |
| -0.166275872 | cg00277165 | TRIP13       | 5  | 4.23E-09   | 0.86929709 |
| -0.165937964 | cg21500005 | TRPC7;TRPC7  | 5  | 2.26E-11   | 0.78506095 |
| -0.165733029 | cg18062245 | TRPC7;TRPC7  | 5  | 3.22E-07   | 0.30569796 |
| -0.1657184   | cg00530568 | TRPC7;TRPC7  | 5  | 6.88E-10   | 0.66903324 |
| -0.165706262 | cg07379888 | TRPM8        | 2  | 3.76E-06   | 0.87344905 |
| -0.165636838 | cg03388266 | TRPM8        | 2  | 0.00017384 | 0.47951851 |
| -0.16530064  | cg23750361 | TRPV1;TRPV:  | 17 | 7.58E-07   | 0.67861749 |
| -0.165237404 | cg01401641 | TSHZ3        | 19 | 7.39E-06   | 0.56406116 |
| -0.165148052 | cg21663359 | TSNARE1      | 8  | 1.03E-05   | 0.41603852 |
| -0.164965874 | cg11384744 | TSPAN13      | 7  | 2.80E-05   | 0.44414537 |
| -0.164936847 | cg18044967 | TSPAN32      | 11 | 4.86E-06   | 0.51380962 |
| -0.164639937 | cg14020320 | TSPAN32;C1:  | 11 | 0.00024979 | 0.29338832 |
| -0.164495974 | cg06766636 | TSPYL1;TSPYI | 6  | 6.90E-08   | 0.48233709 |



|              |            |             |    |            |            |
|--------------|------------|-------------|----|------------|------------|
| -0.164494061 | cg12620005 | TTC39A;TTC3 | 1  | 8.56E-08   | 0.51895964 |
| -0.164268719 | cg02639095 | TTC39B;TTC3 | 9  | 1.40E-05   | 0.56763633 |
| -0.164137263 | cg10062874 | TTC7B       | 14 | 0.01659679 | 0.42629208 |
| -0.163997755 | cg14525390 | TTC7B       | 14 | 1.55E-05   | 0.64595654 |
| -0.163739308 | cg04458567 | TTL         | 2  | 3.64E-05   | 0.65720017 |
| -0.163578503 | cg25414370 | TTLL8       | 22 | 0.00022457 | 0.45765593 |
| -0.163479243 | cg07031797 | TTLL8       | 22 | 6.58E-11   | 0.79703526 |
| -0.163174536 | cg09057412 | TULP4;TULP4 | 6  | 0.00034312 | 0.49067334 |
| -0.163031575 | cg23877497 | TULP4;TULP4 | 6  | 2.37E-08   | 0.72645952 |
| -0.162895198 | cg12601856 | TULP4;TULP4 | 6  | 0.00371709 | 0.61177289 |
| -0.162373772 | cg02060443 | TULP4;TULP4 | 6  | 0.00038207 | 0.7745773  |
| -0.161794974 | cg13068216 | TULP4;TULP4 | 6  | 0.000117   | 0.59550646 |
| -0.161719721 | cg04677937 | TXN         | 9  | 0.00307997 | 0.81032638 |
| -0.161682269 | cg07450210 | UBAC2;UBAC  | 13 | 0.00492874 | 0.72646589 |
| -0.161367279 | cg20555462 | UBASH3B     | 11 | 0.00019229 | 0.67191339 |
| -0.161278603 | cg16635874 | UBE2E3;UBE  | 2  | 1.72E-05   | 0.76563001 |
| -0.161006313 | cg09826973 | UBL4B;UBL4I | 1  | 1.12E-13   | 0.58409533 |
| -0.160907645 | cg18901104 | UHRF1;UHRF  | 19 | 0.01233417 | 0.69174441 |
| -0.160807912 | cg03240473 | UMODL1;UM   | 21 | 0.00619895 | 0.67018743 |
| -0.160741916 | cg09682183 | UNC93A;UNC  | 6  | 9.57E-05   | 0.54848425 |
| -0.160661883 | cg07512971 | USP3        | 15 | 2.22E-06   | 0.24667614 |
| -0.160628359 | cg22599514 | USP3        | 15 | 2.40E-07   | 0.37649962 |
| -0.160383013 | cg10752190 | USP43       | 17 | 9.29E-07   | 0.52352543 |
| -0.160353009 | cg13106430 | USP43       | 17 | 7.00E-09   | 0.41596783 |
| -0.160150105 | cg06528737 | USP6NL;USP  | 10 | 1.24E-05   | 0.70021182 |
| -0.160029636 | cg10853431 | USP6NL;USP  | 10 | 1.35E-07   | 0.63245896 |
| -0.160009974 | cg18766900 | USP6NL;USP  | 10 | 3.02E-07   | 0.62871007 |
| -0.159910147 | cg19109601 | UTP20       | 12 | 4.56E-09   | 0.63595709 |
| -0.159795497 | cg14084888 | UTP23       | 8  | 1.95E-07   | 0.86323747 |
| -0.159674883 | cg09305680 | UTP23       | 8  | 6.63E-10   | 0.3777926  |
| -0.159402004 | cg20625138 | UTS2;UTS2   | 1  | 2.46E-07   | 0.61971043 |
| -0.159362967 | cg17836145 | VNN2        | 6  | 4.42E-06   | 0.34161478 |
| -0.159330532 | cg10044101 | VNN2        | 6  | 9.44E-07   | 0.40745256 |
| -0.158811128 | cg13824500 | VTI1A       | 10 | 1.18E-05   | 0.70019251 |
| -0.158794549 | cg22923514 | VWA2        | 10 | 6.03E-07   | 0.59899004 |
| -0.158634741 | cg02107824 | VWA2        | 10 | 1.38E-11   | 0.60430665 |
| -0.158280998 | cg23363263 | WDFY1       | 2  | 0.00044845 | 0.40768073 |
| -0.158114877 | cg09897604 | WDFY4;WDF   | 10 | 0.00019522 | 0.69931697 |
| -0.158111453 | cg27531366 | WDTC1       | 1  | 7.38E-07   | 0.56056515 |
| -0.158062683 | cg17165848 | WIPF1;WIPF  | 2  | 0.0449908  | 0.39751981 |
| -0.157976085 | cg05639533 | WIPI2;WIPI2 | 7  | 7.02E-05   | 0.54336648 |
| -0.157896525 | cg13497926 | WNK2        | 9  | 2.54E-06   | 0.40159078 |
| -0.157878409 | cg03630015 | WNT10A      | 2  | 1.09E-05   | 0.66610269 |
| -0.157661201 | cg18562578 | WNT5A       | 3  | 2.05E-09   | 0.50921845 |
| -0.157481989 | cg24216596 | WNT5A       | 3  | 9.67E-08   | 0.6117556  |
| -0.157262794 | cg01777121 | WNT5A       | 3  | 0.0001823  | 0.49781685 |

|              |            |             |    |            |            |
|--------------|------------|-------------|----|------------|------------|
| -0.157242598 | cg02298472 | WNT5A       | 3  | 3.42E-08   | 0.69574967 |
| -0.157208001 | cg20746482 | WNT5A       | 3  | 3.00E-07   | 0.4547336  |
| -0.157160411 | cg04941246 | WNT5A       | 3  | 3.63E-09   | 0.51323181 |
| -0.157143984 | cg06830692 | WNT9B       | 17 | 1.53E-07   | 0.65188383 |
| -0.156987045 | cg20464884 | WRNIP1;WRI  | 6  | 2.69E-08   | 0.75254691 |
| -0.156834893 | cg05941376 | WWC1;WWC    | 5  | 0.00305083 | 0.6008911  |
| -0.156812548 | cg02559817 | WWOX        | 16 | 2.89E-13   | 0.90176469 |
| -0.156698321 | cg07493562 | WWOX;WWC    | 16 | 2.61E-05   | 0.40605424 |
| -0.156659459 | cg04215287 | WWTR1;WW    | 3  | 7.96E-05   | 0.79314741 |
| -0.156621586 | cg18940763 | XBP1;XBP1   | 22 | 1.50E-08   | 0.46394198 |
| -0.155900141 | cg11845168 | XPO4        | 13 | 0.00921537 | 0.60564665 |
| -0.15563161  | cg02889774 | XPO7;XPO7;  | 8  | 0.00869604 | 0.75936805 |
| -0.155543272 | cg00347643 | YWHAG       | 7  | 0.02365282 | 0.57211037 |
| -0.155438253 | cg10738119 | YWHAG       | 7  | 3.70E-05   | 0.71007525 |
| -0.155355737 | cg20457523 | YWHAG       | 7  | 1.57E-07   | 0.53861342 |
| -0.155200249 | cg13616508 | YWHAG       | 7  | 9.82E-06   | 0.81042611 |
| -0.155090357 | cg21364719 | ZADH2       | 18 | 6.45E-05   | 0.73346874 |
| -0.15496866  | cg16353800 | ZADH2       | 18 | 9.86E-08   | 0.82604362 |
| -0.154937173 | cg22088248 | ZADH2       | 18 | 2.46E-11   | 0.86615389 |
| -0.154898484 | cg03972071 | ZADH2       | 18 | 6.54E-15   | 0.80590389 |
| -0.154831881 | cg17518710 | ZBTB16;ZBTE | 11 | 6.98E-06   | 0.51100459 |
| -0.154675543 | cg19981243 | ZBTB20;ZBTE | 3  | 2.86E-09   | 0.57919371 |
| -0.15454696  | cg10532384 | ZBTB38      | 3  | 2.28E-11   | 0.83731956 |
| -0.154516928 | cg14918743 | ZBTB42      | 14 | 1.58E-07   | 0.58829115 |
| -0.154432667 | cg08380064 | ZC3H3       | 8  | 3.68E-06   | 0.70752557 |
| -0.154095868 | cg19598713 | ZC3H3       | 8  | 0.00027982 | 0.39576513 |
| -0.154003866 | cg07894883 | ZCCHC24     | 10 | 3.46E-09   | 0.67711617 |
| -0.153908029 | cg17852032 | ZDHHC14;ZD  | 6  | 4.36E-06   | 0.50326519 |
| -0.153697935 | cg27634344 | ZFP42       | 4  | 3.19E-08   | 0.53470582 |
| -0.153525462 | cg08489478 | ZFYVE27;ZFY | 10 | 1.11E-09   | 0.80709221 |
| -0.153522166 | cg23859313 | ZFYVE28     | 4  | 0.00013587 | 0.62665992 |
| -0.153482712 | cg23822407 | ZHX2        | 8  | 1.13E-10   | 0.53989822 |
| -0.153461309 | cg02458516 | ZMAT4;ZMA   | 8  | 1.27E-08   | 0.31419799 |
| -0.153352947 | cg23414595 | ZMAT5;ZMA   | 22 | 8.38E-11   | 0.32985805 |
| -0.15326627  | cg03552937 | ZMIZ2;ZMIZ2 | 7  | 3.47E-07   | 0.41461871 |
| -0.153159151 | cg05716726 | ZNF204P     | 6  | 0.00060743 | 0.63490337 |
| -0.152970543 | cg02335656 | ZNF423      | 16 | 2.83E-09   | 0.66393667 |
| -0.152846279 | cg17219326 | ZNF445      | 3  | 0.00031178 | 0.34477655 |
| -0.152798275 | cg00698602 | ZNF445      | 3  | 4.70E-10   | 0.61455829 |
| -0.15271456  | cg05024961 | ZNF469      | 16 | 0.00047076 | 0.51187353 |
| -0.152530869 | cg03487027 | ZNF503      | 10 | 5.07E-14   | 0.83174709 |
| -0.152352103 | cg13997975 | ZNF503      | 10 | 2.94E-15   | 0.86569119 |
| -0.152302925 | cg12019801 | ZNF516      | 18 | 7.37E-06   | 0.88688708 |
| -0.152238395 | cg08576185 | ZNF598      | 16 | 4.22E-09   | 0.49146142 |
| -0.152061492 | cg05211189 | ZNF598      | 16 | 2.17E-06   | 0.54458257 |
| -0.152047141 | cg05957504 | ZNF608      | 5  | 0.0061078  | 0.55600232 |

|              |            |             |    |            |            |
|--------------|------------|-------------|----|------------|------------|
| -0.151814925 | cg11964338 | ZNF610;ZNF6 | 19 | 1.09E-08   | 0.64877548 |
| -0.151775968 | cg22598458 | ZNF92;ZNF92 | 7  | 8.58E-06   | 0.42706038 |
| -0.151641881 | cg06000330 |             | 7  | 0.00397081 | 0.54523284 |
| -0.15155728  | cg04226804 |             | 1  | 8.08E-10   | 0.53703661 |
| -0.151509045 | cg21814185 |             | 4  | 0.0005584  | 0.58114137 |
| -0.15149868  | cg26885400 |             | 13 | 0.00025212 | 0.41106934 |
| -0.151099988 | cg09385093 |             | 2  | 7.26E-07   | 0.20654346 |
| -0.15106272  | cg15773072 |             | 3  | 1.95E-05   | 0.65149179 |
| -0.150935783 | cg14463995 |             | 9  | 0.00090078 | 0.48114101 |
| -0.150932686 | cg18122743 |             | 2  | 1.36E-06   | 0.63355459 |
| -0.150888823 | cg11869018 |             | 5  | 0.00059878 | 0.48785428 |
| -0.150796086 | cg17587456 |             | 6  | 0.00090661 | 0.60192257 |
| -0.150717974 | cg15897209 |             | 11 | 0.00019367 | 0.38257912 |
| -0.15066614  | cg14758812 |             | 10 | 0.00032825 | 0.60085381 |
| -0.150126736 | cg04508739 |             | 14 | 0.00074802 | 0.44470352 |
| -0.149686748 | cg05656990 |             | 13 | 8.65E-05   | 0.40582717 |
| -0.149177853 | cg24794669 |             | 10 | 0.00667766 | 0.62352228 |
| -0.149076676 | cg08498322 |             | 7  | 0.00018678 | 0.84594288 |
| -0.149023637 | cg00022054 |             | 1  | 1.72E-06   | 0.54702922 |
| -0.148915221 | cg25795290 |             | 10 | 6.01E-05   | 0.43441018 |
| -0.148855292 | cg02005873 |             | 6  | 0.00023147 | 0.29553119 |
| -0.148757486 | cg10898989 |             | 22 | 2.22E-06   | 0.42464201 |
| -0.148639312 | cg26068090 |             | 13 | 0.00025217 | 0.61783357 |
| -0.148638146 | cg06276810 |             | 6  | 0.00082351 | 0.66228335 |
| -0.148156188 | cg15654025 |             | 1  | 0.00041817 | 0.75636646 |
| -0.148110874 | cg11685134 |             | 19 | 7.13E-07   | 0.34589938 |
| -0.147882584 | cg01942106 |             | 16 | 5.60E-05   | 0.53092144 |
| -0.147830405 | cg11030264 |             | 17 | 0.00083829 | 0.74254455 |
| -0.147703729 | cg08422793 |             | 15 | 0.0257781  | 0.67537398 |
| -0.147380877 | cg14830791 |             | 6  | 7.19E-06   | 0.3496623  |
| -0.1467929   | cg04960065 |             | 4  | 0.0250768  | 0.7441775  |
| -0.146691631 | cg01491910 |             | 2  | 9.11E-06   | 0.35137336 |
| -0.146688757 | cg26283879 |             | 8  | 0.00356356 | 0.71777046 |
| -0.146610924 | cg06814469 |             | 1  | 0.00050495 | 0.478437   |
| -0.14650907  | cg27203560 |             | 3  | 0.00166378 | 0.84223462 |
| -0.146498322 | cg08543278 |             | 7  | 2.78E-14   | 0.48386719 |
| -0.14628136  | cg01708458 |             | 2  | 0.00040171 | 0.38661567 |
| -0.146153108 | cg20549620 |             | 2  | 0.00131088 | 0.74301551 |
| -0.145933006 | cg00720159 |             | 2  | 4.08E-05   | 0.77516198 |
| -0.145913169 | cg06137123 |             | 11 | 2.50E-11   | 0.87658431 |
| -0.145875939 | cg10276948 |             | 8  | 2.59E-06   | 0.59476985 |
| -0.145799631 | cg12100721 |             | 17 | 3.72E-06   | 0.23792683 |
| -0.145700111 | cg03982831 |             | 1  | 0.00024845 | 0.47872324 |
| -0.145480995 | cg18220920 |             | 12 | 0.00236582 | 0.22052459 |
| -0.145467261 | cg05895376 |             | 15 | 1.83E-05   | 0.2683537  |
| -0.14515996  | cg00392155 |             | 2  | 0.01218433 | 0.62504373 |

|              |            |    |            |            |
|--------------|------------|----|------------|------------|
| -0.144887529 | cg08543028 | 12 | 0.00119863 | 0.80022045 |
| -0.144883339 | cg19396666 | 10 | 0.0024819  | 0.50262028 |
| -0.144744747 | cg12526091 | 12 | 6.17E-06   | 0.47860993 |
| -0.144744595 | cg08938448 | 9  | 7.86E-08   | 0.43602506 |
| -0.144595918 | cg01978937 | 20 | 0.00024177 | 0.81878496 |
| -0.144543417 | cg08683644 | 10 | 1.71E-05   | 0.31688402 |
| -0.144439083 | cg03464765 | 11 | 0.01006716 | 0.74686334 |
| -0.144387757 | cg11106652 | 4  | 7.64E-05   | 0.82011834 |
| -0.144375539 | cg17642941 | 7  | 0.01401617 | 0.85319251 |
| -0.144317436 | cg24935598 | 3  | 0.00043768 | 0.86096465 |
| -0.144305192 | cg01903420 | 13 | 2.52E-05   | 0.46055556 |
| -0.144173725 | cg09682128 | 13 | 0.00012888 | 0.33788801 |
| -0.14411982  | cg02650127 | 6  | 3.30E-05   | 0.31847781 |
| -0.144111956 | cg20778022 | 7  | 1.38E-05   | 0.75605392 |
| -0.144063904 | cg12039766 | 2  | 9.91E-06   | 0.42260203 |
| -0.144020882 | cg15582138 | 12 | 0.00293532 | 0.67813373 |
| -0.144014626 | cg16446721 | 2  | 1.95E-08   | 0.25624036 |
| -0.143810444 | cg08125436 | 16 | 0.00974894 | 0.46463425 |
| -0.143806177 | cg23080060 | 5  | 0.00175466 | 0.63042063 |
| -0.143781267 | cg13944018 | 17 | 2.41E-10   | 0.2792214  |
| -0.143750127 | cg23633059 | 1  | 0.00300646 | 0.77057415 |
| -0.143744493 | cg22166728 | 1  | 2.03E-07   | 0.36545509 |
| -0.143669221 | cg02490659 | 9  | 0.00072002 | 0.46489509 |
| -0.143637834 | cg25019989 | 4  | 2.04E-06   | 0.31447774 |
| -0.142936251 | cg15699099 | 2  | 0.00246331 | 0.52240812 |
| -0.142747766 | cg23190268 | 7  | 0.00931791 | 0.82480061 |
| -0.142648383 | cg19102120 | 5  | 2.44E-08   | 0.85565191 |
| -0.142621645 | cg07847452 | 16 | 4.12E-06   | 0.57936844 |
| -0.142439279 | cg24700929 | 12 | 2.56E-10   | 0.8465249  |
| -0.142338942 | cg04198042 | 17 | 1.01E-08   | 0.28976407 |
| -0.142097228 | cg18489994 | 4  | 0.01314519 | 0.39186267 |
| -0.141993106 | cg02319354 | 5  | 4.04E-08   | 0.3440265  |
| -0.141937093 | cg12883629 | 6  | 0.00139792 | 0.5971839  |
| -0.141526806 | cg14462369 | 6  | 0.03303307 | 0.51604858 |
| -0.141383906 | cg03055271 | 1  | 0.00454813 | 0.54439895 |
| -0.141348758 | cg19719391 | 4  | 6.83E-06   | 0.65188868 |
| -0.141321956 | cg06619938 | 12 | 3.04E-11   | 0.2644767  |
| -0.141314923 | cg11936809 | 8  | 0.0040882  | 0.55575674 |
| -0.141264199 | cg05081908 | 4  | 0.00072627 | 0.4436194  |
| -0.141231031 | cg17160525 | 6  | 7.86E-08   | 0.34749063 |
| -0.141155482 | cg11465213 | 15 | 0.00994085 | 0.64978315 |
| -0.141027271 | cg07076850 | 6  | 2.58E-07   | 0.39450668 |
| -0.1410146   | cg01246444 | 2  | 3.14E-06   | 0.41253482 |
| -0.140820403 | cg20625523 | 2  | 0.00012756 | 0.6421709  |
| -0.140820245 | cg14679668 | 8  | 0.00045907 | 0.44449959 |
| -0.140672192 | cg15989167 | 10 | 0.00017095 | 0.71408604 |

|              |            |    |            |            |
|--------------|------------|----|------------|------------|
| -0.140649808 | cg05000994 | 7  | 1.73E-05   | 0.48468141 |
| -0.140548534 | cg14147498 | 9  | 2.04E-05   | 0.49848698 |
| -0.140533292 | cg12656085 | 2  | 0.00497211 | 0.58331103 |
| -0.140439211 | cg26241893 | 5  | 0.00165157 | 0.60656726 |
| -0.140430075 | cg05215481 | 2  | 2.20E-06   | 0.38294986 |
| -0.140254474 | cg21348406 | 17 | 0.00306065 | 0.71279863 |
| -0.140201633 | cg22004089 | 2  | 6.79E-07   | 0.80337897 |
| -0.140114351 | cg21393885 | 17 | 6.78E-05   | 0.74913871 |
| -0.140010264 | cg05339976 | 2  | 1.15E-05   | 0.50834755 |
| -0.139856707 | cg02516703 | 5  | 0.00032642 | 0.57989858 |
| -0.139798295 | cg09394306 | 2  | 1.28E-06   | 0.69932916 |
| -0.139707375 | cg05468948 | 6  | 0.00040222 | 0.4492905  |
| -0.139646743 | cg09894814 | 1  | 2.83E-08   | 0.83934428 |
| -0.139572694 | cg00197266 | 6  | 0.02212032 | 0.76962559 |
| -0.139543475 | cg02071418 | 4  | 1.02E-07   | 0.65016382 |
| -0.139469799 | cg06575772 | 8  | 0.00014343 | 0.74194794 |
| -0.139407609 | cg25156960 | 7  | 0.00039911 | 0.36628088 |
| -0.139171898 | cg10227629 | 1  | 5.31E-08   | 0.69707813 |
| -0.139168138 | cg04789475 | 4  | 4.55E-08   | 0.33866007 |
| -0.139011177 | cg14232108 | 9  | 0.03888454 | 0.59632446 |
| -0.138715367 | cg09317676 | 12 | 0.00164546 | 0.6804945  |
| -0.138660554 | cg19683821 | 10 | 0.00048935 | 0.81182916 |
| -0.138614524 | cg16097858 | 2  | 0.00511473 | 0.61422394 |
| -0.138489091 | cg05933510 | 1  | 0.00616104 | 0.79634737 |
| -0.138163734 | cg00291837 | 1  | 0.00103901 | 0.68013879 |
| -0.13811574  | cg25338818 | 18 | 0.00011451 | 0.66628495 |
| -0.138081635 | cg25601481 | 6  | 2.65E-06   | 0.56864349 |
| -0.138075753 | cg10234991 | 12 | 1.38E-07   | 0.39225106 |
| -0.13806204  | cg26538035 | 1  | 0.0003735  | 0.61662541 |
| -0.13792912  | cg03257930 | 9  | 0.00121155 | 0.83943446 |
| -0.137853379 | cg15244101 | 12 | 0.0019141  | 0.88245162 |
| -0.137852299 | cg05698294 | 2  | 0.01599617 | 0.6590057  |
| -0.137602694 | cg20366218 | 2  | 7.82E-07   | 0.67997389 |
| -0.137415093 | cg08980304 | 2  | 3.04E-08   | 0.70051789 |
| -0.137322395 | cg11874976 | 14 | 5.90E-12   | 0.64903395 |
| -0.137259729 | cg27584135 | 3  | 0.01302457 | 0.65669065 |
| -0.136706548 | cg21229570 | 12 | 0.00016862 | 0.22188805 |
| -0.136695438 | cg10163220 | 12 | 4.47E-09   | 0.57470478 |
| -0.136640549 | cg01612883 | 12 | 0.00011197 | 0.77416124 |
| -0.136549689 | cg14283944 | 12 | 4.56E-05   | 0.19274282 |
| -0.136480406 | cg07029024 | 11 | 0.00136858 | 0.59053048 |
| -0.136462477 | cg12934366 | 8  | 0.00014457 | 0.56817972 |
| -0.136441026 | cg27560481 | 17 | 6.12E-06   | 0.75207829 |
| -0.136234671 | cg12775181 | 7  | 6.30E-09   | 0.36876862 |
| -0.13622867  | cg02249233 | 2  | 0.00497774 | 0.54977867 |
| -0.136168713 | cg00931957 | 1  | 9.30E-05   | 0.76544165 |

|              |            |    |            |            |
|--------------|------------|----|------------|------------|
| -0.136035413 | cg05937055 | 1  | 1.20E-06   | 0.5767397  |
| -0.135956843 | cg11958666 | 8  | 0.01384411 | 0.53530475 |
| -0.135956481 | cg12177851 | 15 | 0.00298927 | 0.7629937  |
| -0.135953406 | cg25471923 | 7  | 0.00093162 | 0.5241616  |
| -0.135951729 | cg03209395 | 7  | 2.10E-12   | 0.27978358 |
| -0.135784311 | cg15488963 | 2  | 1.49E-05   | 0.75069574 |
| -0.135769949 | cg08161142 | 13 | 0.01179134 | 0.75300288 |
| -0.135725629 | cg01510278 | 16 | 0.04683169 | 0.4411094  |
| -0.135522003 | cg26472938 | 2  | 4.50E-06   | 0.85375133 |
| -0.1355169   | cg13936452 | 1  | 5.00E-05   | 0.75945396 |
| -0.135415946 | cg23202167 | 19 | 0.00032188 | 0.52237419 |
| -0.135329542 | cg15899743 | 14 | 3.92E-05   | 0.3014746  |
| -0.135192597 | cg01240056 | 7  | 1.14E-06   | 0.29519631 |
| -0.135107255 | cg12830569 | 14 | 4.03E-05   | 0.75131864 |
| -0.135077319 | cg26235369 | 5  | 1.91E-06   | 0.62535907 |
| -0.134942527 | cg09091941 | 6  | 0.00282002 | 0.60197005 |
| -0.134780833 | cg24611709 | 7  | 1.85E-06   | 0.82854921 |
| -0.13473847  | cg15682797 | 8  | 0.00301196 | 0.70846941 |
| -0.134690772 | cg03149058 | 1  | 2.27E-07   | 0.69625536 |
| -0.134675751 | cg08178956 | 2  | 0.0018302  | 0.36296521 |
| -0.1345459   | cg21233675 | 12 | 0.00279379 | 0.73016125 |
| -0.13441554  | cg07296447 | 7  | 4.88E-08   | 0.3241671  |
| -0.134266675 | cg19566906 | 4  | 8.92E-11   | 0.78270967 |
| -0.134231682 | cg02063817 | 7  | 0.01675848 | 0.76229846 |
| -0.134201548 | cg21186560 | 9  | 5.86E-05   | 0.6499496  |
| -0.134194204 | cg21059878 | 4  | 0.00048667 | 0.65352255 |
| -0.134132582 | cg05908442 | 15 | 2.31E-05   | 0.36698561 |
| -0.134132098 | cg10086659 | 2  | 1.47E-08   | 0.84222493 |
| -0.134068538 | cg07211768 | 12 | 0.00776015 | 0.34136154 |
| -0.133954923 | cg09546889 | 2  | 5.04E-05   | 0.72761227 |
| -0.133859315 | cg26425256 | 2  | 2.28E-08   | 0.25133763 |
| -0.133783798 | cg04369350 | 7  | 1.03E-05   | 0.39192126 |
| -0.133717222 | cg25702651 | 3  | 0.01834283 | 0.37672147 |
| -0.133513163 | cg14495514 | 9  | 0.00140372 | 0.55765436 |
| -0.133248682 | cg12656681 | 5  | 0.03675244 | 0.57487903 |
| -0.133245802 | cg26076724 | 6  | 5.59E-11   | 0.68694075 |
| -0.133217768 | cg16976599 | 2  | 0.00218514 | 0.7081098  |
| -0.132938307 | cg08456051 | 4  | 0.00851887 | 0.48695981 |
| -0.132853265 | cg08823554 | 21 | 1.52E-14   | 0.87977742 |
| -0.132671698 | cg00632007 | 6  | 0.00025174 | 0.748307   |
| -0.132613867 | cg27426921 | 10 | 5.48E-08   | 0.48081162 |
| -0.132534895 | cg11694776 | 12 | 2.71E-06   | 0.71781989 |
| -0.132227511 | cg02924972 | 13 | 3.32E-05   | 0.75019192 |
| -0.132210892 | cg10103266 | 2  | 3.20E-12   | 0.26285239 |
| -0.132171726 | cg20536364 | 5  | 2.99E-08   | 0.82829563 |
| -0.13211047  | cg13106758 | 15 | 0.04615624 | 0.59415906 |

|              |            |    |            |            |
|--------------|------------|----|------------|------------|
| -0.132007022 | cg26437203 | 5  | 1.31E-07   | 0.33627393 |
| -0.131887895 | cg11234447 | 5  | 1.52E-05   | 0.76227956 |
| -0.131875589 | cg27142530 | 4  | 0.00031089 | 0.48811215 |
| -0.131845892 | cg19034132 | 10 | 2.54E-05   | 0.57542626 |
| -0.131824033 | cg05342515 | 2  | 2.46E-10   | 0.28990128 |
| -0.131682051 | cg06655665 | 2  | 9.47E-05   | 0.50853601 |
| -0.131420036 | cg17180237 | 1  | 0.01177978 | 0.68358855 |
| -0.131259898 | cg26213663 | 6  | 0.00132807 | 0.67155131 |
| -0.131106047 | cg12133423 | 8  | 0.00130988 | 0.74967903 |
| -0.130898828 | cg01928206 | 2  | 1.89E-05   | 0.75793041 |
| -0.130787939 | cg19907968 | 7  | 1.92E-06   | 0.79417208 |
| -0.130723977 | cg12570032 | 11 | 0.00080235 | 0.72657776 |
| -0.130657518 | cg05988548 | 7  | 6.63E-11   | 0.32427104 |
| -0.130588056 | cg10108888 | 7  | 6.68E-07   | 0.80433738 |
| -0.130580137 | cg15476396 | 15 | 0.00061631 | 0.5447149  |
| -0.130517177 | cg20141398 | 1  | 7.40E-09   | 0.76018994 |
| -0.130431999 | cg10522770 | 7  | 7.11E-10   | 0.27237354 |
| -0.130263324 | cg27162882 | 7  | 0.00035775 | 0.78574507 |
| -0.130245307 | cg25773259 | 12 | 0.00785557 | 0.41305489 |
| -0.130165488 | cg13050802 | 3  | 5.58E-05   | 0.56498294 |
| -0.129990087 | cg05861512 | 14 | 2.78E-05   | 0.51381138 |
| -0.129805975 | cg02210967 | 7  | 7.77E-10   | 0.55779246 |
| -0.129755664 | cg08260398 | 1  | 0.00232416 | 0.71621338 |
| -0.129736688 | cg04341343 | 2  | 0.00121925 | 0.60721753 |
| -0.129674226 | cg01899355 | 2  | 1.03E-07   | 0.58171084 |
| -0.129576748 | cg20364222 | 8  | 0.00675103 | 0.40771775 |
| -0.129569082 | cg23605284 | 10 | 0.01807557 | 0.41748654 |
| -0.129382659 | cg12389397 | 1  | 4.87E-05   | 0.61570295 |
| -0.12910476  | cg16506426 | 5  | 0.0038303  | 0.80318925 |
| -0.12907514  | cg25243082 | 4  | 2.38E-06   | 0.54459608 |
| -0.129056829 | cg26785370 | 17 | 0.00038827 | 0.53243258 |
| -0.12905321  | cg23076949 | 12 | 0.00012032 | 0.58222739 |
| -0.129034266 | cg08056069 | 1  | 3.89E-07   | 0.23370343 |
| -0.129033322 | cg11502555 | 13 | 6.27E-08   | 0.26122146 |
| -0.128927098 | cg09467433 | 3  | 2.46E-05   | 0.60864691 |
| -0.128838097 | cg26573923 | 16 | 2.75E-05   | 0.59249001 |
| -0.128732688 | cg17993313 | 5  | 3.11E-09   | 0.85181957 |
| -0.128703098 | cg26875626 | 4  | 0.0010905  | 0.84713232 |
| -0.128634213 | cg10525394 | 6  | 3.30E-07   | 0.6007409  |
| -0.128625801 | cg03310906 | 20 | 4.85E-07   | 0.74321608 |
| -0.128583698 | cg13753662 | 17 | 1.28E-10   | 0.7801752  |
| -0.128480558 | cg26411222 | 12 | 0.007249   | 0.26258468 |
| -0.128432825 | cg10624395 | 11 | 0.00647552 | 0.41501347 |
| -0.128365574 | cg23464619 | 13 | 0.00400606 | 0.62191702 |
| -0.128332082 | cg03022510 | 2  | 4.54E-10   | 0.6939983  |
| -0.128124418 | cg26880708 | 11 | 0.00032507 | 0.54168275 |

|              |            |    |            |            |
|--------------|------------|----|------------|------------|
| -0.128072136 | cg16497945 | 15 | 1.18E-05   | 0.70446372 |
| -0.12794369  | cg06005173 | 8  | 0.04923994 | 0.79455658 |
| -0.127813727 | cg16800228 | 15 | 4.23E-08   | 0.85220081 |
| -0.12780641  | cg16927416 | 8  | 0.00027477 | 0.54241782 |
| -0.12769115  | cg26780125 | 8  | 0.01301974 | 0.66386161 |
| -0.127677104 | cg19235893 | 2  | 8.20E-05   | 0.31370316 |
| -0.127589662 | cg14859350 | 14 | 4.88E-08   | 0.70035515 |
| -0.127459356 | cg25203286 | 18 | 1.09E-06   | 0.32346856 |
| -0.127448374 | cg09266144 | 14 | 3.97E-06   | 0.60615741 |
| -0.127293619 | cg09207762 | 6  | 3.54E-06   | 0.24874576 |
| -0.127251689 | cg01169559 | 10 | 0.00214951 | 0.4450913  |
| -0.127126016 | cg23198815 | 11 | 1.58E-06   | 0.70029941 |
| -0.127112186 | cg09205293 | 16 | 5.84E-09   | 0.61782219 |
| -0.127068638 | cg02707307 | 9  | 0.00023462 | 0.64688341 |
| -0.127040062 | cg15317129 | 3  | 2.35E-05   | 0.74034735 |
| -0.126822726 | cg05798996 | 7  | 2.21E-06   | 0.73242522 |
| -0.126741897 | cg21171610 | 4  | 1.24E-05   | 0.65683361 |
| -0.126707028 | cg26785499 | 1  | 8.38E-07   | 0.5382332  |
| -0.12657592  | cg12532966 | 5  | 3.64E-08   | 0.34210685 |
| -0.126491017 | cg20099104 | 10 | 5.91E-07   | 0.29305577 |
| -0.126401417 | cg23067466 | 3  | 1.23E-08   | 0.59675369 |
| -0.126223977 | cg25095187 | 2  | 3.42E-08   | 0.64349912 |
| -0.126189559 | cg14480446 | 5  | 4.71E-05   | 0.42142149 |
| -0.126000367 | cg01549525 | 1  | 0.00202857 | 0.44235034 |
| -0.1259906   | cg27620317 | 7  | 0.00013911 | 0.30185205 |
| -0.125988138 | cg15360771 | 12 | 1.05E-06   | 0.5510661  |
| -0.125950989 | cg17709804 | 11 | 0.00023135 | 0.79382148 |
| -0.125880922 | cg18879198 | 2  | 9.20E-07   | 0.58539807 |
| -0.125814443 | cg24052851 | 9  | 1.39E-06   | 0.90016966 |
| -0.1256839   | cg16966496 | 12 | 6.54E-06   | 0.30405339 |
| -0.125669991 | cg06910580 | 12 | 4.59E-05   | 0.53556946 |
| -0.125575991 | cg10979436 | 7  | 2.42E-05   | 0.59402642 |
| -0.125556089 | cg13564816 | 9  | 0.00426229 | 0.57358913 |
| -0.125502529 | cg07645809 | 6  | 6.69E-07   | 0.75452029 |
| -0.125475582 | cg22992137 | 2  | 1.48E-06   | 0.73035513 |
| -0.125339289 | cg11007850 | 2  | 5.88E-05   | 0.69999662 |
| -0.125308939 | cg09264231 | 1  | 0.01064823 | 0.64641135 |
| -0.125241272 | cg06371502 | 1  | 6.77E-06   | 0.3206207  |
| -0.125196714 | cg26013992 | 1  | 9.93E-05   | 0.69201935 |
| -0.125158173 | cg01231009 | 8  | 2.17E-07   | 0.77012132 |
| -0.125110441 | cg19580937 | 15 | 2.01E-06   | 0.78011218 |
| -0.124985123 | cg24969303 | 13 | 2.12E-07   | 0.72610143 |
| -0.124905986 | cg13543355 | 14 | 2.65E-06   | 0.41463911 |
| -0.124741864 | cg16873443 | 2  | 4.63E-05   | 0.42267484 |
| -0.124656171 | cg20371046 | 13 | 0.00240455 | 0.48303074 |
| -0.124423884 | cg00462107 | 5  | 0.01230274 | 0.54067043 |



|              |            |    |            |            |
|--------------|------------|----|------------|------------|
| -0.124410835 | cg14845812 | 2  | 0.00762447 | 0.84366856 |
| -0.124324751 | cg10925915 | 3  | 0.00020763 | 0.63241185 |
| -0.124055437 | cg26866349 | 16 | 3.22E-05   | 0.87117675 |
| -0.124002743 | cg07019835 | 7  | 1.93E-11   | 0.67375866 |
| -0.123985006 | cg16656979 | 15 | 2.68E-09   | 0.26601837 |
| -0.123936025 | cg20305578 | 8  | 4.09E-08   | 0.68898427 |
| -0.123905214 | cg03734750 | 4  | 2.39E-07   | 0.72285125 |
| -0.12383953  | cg22164009 | 6  | 0.00044201 | 0.52129051 |
| -0.123775704 | cg16311740 | 3  | 1.56E-05   | 0.54868913 |
| -0.123707007 | cg19119382 | 7  | 0.00079581 | 0.71798492 |
| -0.123698312 | cg05213379 | 5  | 0.00371012 | 0.71870054 |
| -0.123632207 | cg20668221 | 2  | 0.00024828 | 0.40588743 |
| -0.123550358 | cg04560093 | 8  | 0.00644428 | 0.82151271 |
| -0.123449058 | cg22115196 | 4  | 1.27E-06   | 0.64224879 |
| -0.123446694 | cg12077685 | 14 | 7.39E-13   | 0.89030584 |
| -0.123444799 | cg24990255 | 2  | 0.00490446 | 0.50753565 |
| -0.123404443 | cg10244770 | 12 | 4.29E-05   | 0.64159907 |
| -0.123372    | cg16163826 | 11 | 4.30E-05   | 0.70443727 |
| -0.123254191 | cg06854197 | 17 | 0.00237508 | 0.39916031 |
| -0.123229762 | cg22026918 | 15 | 1.64E-05   | 0.6919107  |
| -0.123044283 | cg10932486 | 5  | 4.79E-09   | 0.49196396 |
| -0.122981621 | cg13746740 | 11 | 5.28E-06   | 0.76438127 |
| -0.122893528 | cg24899558 | 5  | 9.93E-07   | 0.76072741 |
| -0.122814037 | cg25496627 | 7  | 0.00067811 | 0.4108445  |
| -0.122698981 | cg10230591 | 13 | 0.00021792 | 0.57739097 |
| -0.122678253 | cg05461169 | 3  | 1.47E-06   | 0.64844357 |
| -0.122677821 | cg07652447 | 8  | 0.00989546 | 0.6076709  |
| -0.122629943 | cg07328317 | 4  | 0.00035546 | 0.62874539 |
| -0.122600444 | cg20462100 | 1  | 1.86E-05   | 0.70540943 |
| -0.122446233 | cg18917524 | 10 | 2.94E-08   | 0.76613125 |
| -0.12240536  | cg24155427 | 1  | 1.31E-07   | 0.45507186 |
| -0.122381883 | cg24983752 | 11 | 0.00015473 | 0.5121656  |
| -0.121900301 | cg27577928 | 4  | 0.02149611 | 0.79496616 |
| -0.121709813 | cg02296931 | 1  | 9.72E-05   | 0.69858269 |
| -0.121674151 | cg04051365 | 3  | 0.02352732 | 0.59738379 |
| -0.121613528 | cg08349497 | 3  | 3.78E-05   | 0.70788219 |
| -0.12161199  | cg21886042 | 13 | 0.00012948 | 0.72641576 |
| -0.121475905 | cg07991139 | 11 | 5.71E-09   | 0.67245675 |
| -0.12145518  | cg01975934 | 8  | 0.00384928 | 0.56825344 |
| -0.121440505 | cg11596779 | 5  | 9.33E-05   | 0.54656905 |
| -0.121425816 | cg20595634 | 10 | 4.46E-07   | 0.50443281 |
| -0.121391083 | cg21100077 | 13 | 3.62E-08   | 0.34405622 |
| -0.121198273 | cg16564033 | 21 | 0.00323795 | 0.74984296 |
| -0.121149192 | cg17083685 | 13 | 0.00516234 | 0.59826201 |
| -0.121110343 | cg01766850 | 6  | 0.03596094 | 0.57947083 |
| -0.121045776 | cg26993496 | 5  | 4.28E-06   | 0.35998645 |

|              |            |    |            |            |
|--------------|------------|----|------------|------------|
| -0.120928373 | cg15887927 | 13 | 0.00019341 | 0.38683921 |
| -0.120714349 | cg02101876 | 13 | 4.12E-06   | 0.71969959 |
| -0.12059293  | cg00456299 | 1  | 0.00111079 | 0.39388052 |
| -0.120482083 | cg18609306 | 17 | 1.62E-06   | 0.42060498 |
| -0.120471983 | cg01953615 | 16 | 4.10E-11   | 0.8662103  |
| -0.120454109 | cg04879838 | 7  | 1.90E-07   | 0.52794481 |
| -0.120435553 | cg00453938 | 20 | 1.83E-05   | 0.37552816 |
| -0.120393537 | cg14200631 | 14 | 1.05E-05   | 0.54502844 |
| -0.120384598 | cg08574915 | 17 | 3.50E-07   | 0.6253909  |
| -0.120279542 | cg04423493 | 14 | 0.00045233 | 0.44538783 |
| -0.12018069  | cg02480320 | 5  | 0.00342346 | 0.37485081 |
| -0.12017737  | cg12784272 | 17 | 2.19E-05   | 0.42892331 |
| -0.120139663 | cg12748499 | 1  | 7.94E-05   | 0.80545956 |
| -0.120097684 | cg26236329 | 11 | 0.00909035 | 0.73986973 |
| -0.120065461 | cg17388712 | 7  | 0.00017138 | 0.43167494 |
| -0.119970678 | cg25928986 | 7  | 0.00744225 | 0.64940605 |
| -0.119949122 | cg20156353 | 11 | 0.00054547 | 0.5137578  |
| -0.11982808  | cg01558960 | 16 | 0.00032783 | 0.69650632 |
| -0.119806089 | cg16776035 | 17 | 2.20E-08   | 0.34734501 |
| -0.119791695 | cg21740232 | 2  | 2.92E-06   | 0.44134554 |
| -0.119774408 | cg07621853 | 2  | 2.68E-05   | 0.8040289  |
| -0.119727975 | cg26407841 | 7  | 0.00524053 | 0.55301372 |
| -0.119674408 | cg00106345 | 7  | 0.00010489 | 0.58246166 |
| -0.119663446 | cg09398762 | 13 | 0.00111808 | 0.75610544 |
| -0.119647552 | cg08078751 | 12 | 3.37E-06   | 0.80975686 |
| -0.119621466 | cg07965110 | 1  | 6.30E-06   | 0.41746137 |
| -0.119507533 | cg16264616 | 12 | 1.82E-08   | 0.26720107 |
| -0.11947722  | cg08985530 | 12 | 0.0002237  | 0.63101326 |
| -0.119063728 | cg26752576 | 6  | 0.00238362 | 0.54773844 |
| -0.119014083 | cg04234923 | 5  | 6.84E-06   | 0.62250384 |
| -0.119008065 | cg25059408 | 22 | 1.76E-05   | 0.6853365  |
| -0.119005769 | cg21644489 | 15 | 9.62E-05   | 0.56582817 |
| -0.118987605 | cg13993183 | 9  | 2.23E-09   | 0.6061591  |
| -0.118987407 | cg16153549 | 2  | 6.75E-06   | 0.29705607 |
| -0.118963762 | cg16619576 | 2  | 0.01470428 | 0.48770516 |
| -0.118894111 | cg12977346 | 8  | 0.00178063 | 0.4543699  |
| -0.118843094 | cg26264232 | 7  | 4.92E-05   | 0.61778154 |
| -0.118700908 | cg23462772 | 10 | 0.03126115 | 0.55061246 |
| -0.118643038 | cg08954863 | 10 | 1.72E-07   | 0.69915246 |
| -0.118544922 | cg17666418 | 6  | 0.00149894 | 0.70714466 |
| -0.118274222 | cg08830565 | 7  | 9.79E-05   | 0.57725576 |
| -0.118163642 | cg04218745 | 16 | 3.58E-07   | 0.31061745 |
| -0.118086963 | cg24420742 | 12 | 1.98E-08   | 0.79037128 |
| -0.117986678 | cg05260077 | 21 | 1.48E-05   | 0.66920546 |
| -0.117919303 | cg01141339 | 5  | 6.54E-09   | 0.3198934  |
| -0.117839827 | cg24609101 | 8  | 7.77E-05   | 0.64896882 |

|              |            |    |            |            |
|--------------|------------|----|------------|------------|
| -0.117834958 | cg17325866 | 2  | 3.26E-08   | 0.39085108 |
| -0.1178209   | cg25607177 | 11 | 0.00057766 | 0.74081633 |
| -0.117802594 | cg14418857 | 7  | 0.00010306 | 0.53515365 |
| -0.117777252 | cg21961149 | 15 | 4.92E-06   | 0.78898498 |
| -0.117738624 | cg26182406 | 14 | 0.00208964 | 0.28866024 |
| -0.117659773 | cg00980060 | 1  | 0.00057209 | 0.44340951 |
| -0.117649264 | cg22912834 | 2  | 0.00935771 | 0.8428497  |
| -0.117616275 | cg03242471 | 2  | 6.67E-05   | 0.33662543 |
| -0.117611891 | cg08244518 | 22 | 4.69E-07   | 0.69133662 |
| -0.117550043 | cg25340711 | 1  | 1.12E-06   | 0.64153702 |
| -0.117401741 | cg08321483 | 4  | 2.17E-05   | 0.48771913 |
| -0.117337017 | cg15497048 | 10 | 1.31E-07   | 0.54089699 |
| -0.117277078 | cg12153794 | 12 | 5.71E-05   | 0.25988964 |
| -0.117154001 | cg18692070 | 10 | 8.52E-05   | 0.67342134 |
| -0.117135421 | cg24936799 | 10 | 1.95E-06   | 0.5741845  |
| -0.117118627 | cg24617444 | 10 | 7.67E-05   | 0.4859668  |
| -0.117089172 | cg25943481 | 15 | 7.45E-05   | 0.5832572  |
| -0.117069251 | cg07948085 | 10 | 4.00E-06   | 0.66158286 |
| -0.117000232 | cg06697175 | 11 | 0.00020844 | 0.55750825 |
| -0.116990844 | cg09610558 | 16 | 2.10E-07   | 0.66820856 |
| -0.116967142 | cg15990451 | 1  | 7.63E-06   | 0.74383428 |
| -0.116955591 | cg11332163 | 4  | 0.01696672 | 0.78670206 |
| -0.116955591 | cg21540621 | 11 | 1.82E-07   | 0.37361469 |
| -0.116871003 | cg03233332 | 7  | 0.00338835 | 0.52169067 |
| -0.116779671 | cg12668649 | 3  | 2.59E-06   | 0.67741194 |
| -0.116598819 | cg00129785 | 21 | 5.20E-05   | 0.68641331 |
| -0.116549031 | cg14761514 | 12 | 3.96E-07   | 0.7698105  |
| -0.11652947  | cg09294739 | 16 | 2.55E-06   | 0.36847743 |
| -0.116495312 | cg04623371 | 6  | 1.74E-07   | 0.26040614 |
| -0.116463535 | cg21535606 | 1  | 0.00103461 | 0.8255941  |
| -0.116396161 | cg00515814 | 11 | 5.06E-11   | 0.59378747 |
| -0.116344794 | cg07311659 | 4  | 5.38E-09   | 0.27309578 |
| -0.11619115  | cg19699317 | 10 | 5.50E-10   | 0.78535563 |
| -0.116175071 | cg22046201 | 1  | 0.00106556 | 0.62481775 |
| -0.116097452 | cg00602295 | 16 | 0.00511363 | 0.49626613 |
| -0.116094587 | cg10020890 | 16 | 1.33E-06   | 0.62971042 |
| -0.116060345 | cg17745697 | 2  | 7.15E-05   | 0.62419476 |
| -0.116051989 | cg00527307 | 13 | 6.25E-07   | 0.79387089 |
| -0.115959953 | cg22668767 | 5  | 2.13E-07   | 0.55282701 |
| -0.115891125 | cg17669581 | 4  | 2.12E-06   | 0.52001326 |
| -0.115889067 | cg20268039 | 7  | 2.18E-05   | 0.30597755 |
| -0.115819192 | cg01924952 | 2  | 1.95E-06   | 0.404413   |
| -0.115703814 | cg26272651 | 8  | 0.00240259 | 0.7578577  |
| -0.115587801 | cg16017420 | 12 | 0.00125832 | 0.6009969  |
| -0.115493246 | cg13100137 | 1  | 4.03E-09   | 0.43362953 |
| -0.115442066 | cg05123755 | 7  | 3.37E-07   | 0.90014668 |

|              |            |    |            |            |
|--------------|------------|----|------------|------------|
| -0.115337591 | cg04522596 | 12 | 0.00060503 | 0.3932111  |
| -0.115305486 | cg09697697 | 17 | 0.00019063 | 0.42241992 |
| -0.11515164  | cg00958550 | 6  | 0.0001137  | 0.28523924 |
| -0.115143697 | cg23843705 | 1  | 2.60E-05   | 0.7968595  |
| -0.115088441 | cg00667647 | 1  | 0.02193318 | 0.71977744 |
| -0.114981234 | cg01037082 | 22 | 0.00241577 | 0.76339605 |
| -0.114973467 | cg08406698 | 6  | 4.72E-05   | 0.7149951  |
| -0.114943261 | cg07612923 | 3  | 0.00220674 | 0.32656273 |
| -0.114939198 | cg07673103 | 8  | 1.70E-07   | 0.39427522 |
| -0.114909917 | cg09265016 | 12 | 1.14E-06   | 0.75995316 |
| -0.114898958 | cg04224786 | 8  | 3.08E-07   | 0.43601131 |
| -0.114870248 | cg12741572 | 18 | 0.00114535 | 0.55277463 |
| -0.11484151  | cg03989749 | 5  | 6.12E-10   | 0.75160213 |
| -0.114837966 | cg00362657 | 21 | 0.00108625 | 0.62578201 |
| -0.114810279 | cg10665065 | 15 | 6.15E-08   | 0.57352509 |
| -0.114557837 | cg05777602 | 16 | 1.22E-06   | 0.75055984 |
| -0.114517685 | cg14533595 | 10 | 1.23E-11   | 0.84495327 |
| -0.114493347 | cg22521263 | 4  | 5.72E-05   | 0.46369515 |
| -0.114487646 | cg26944426 | 7  | 1.09E-06   | 0.61889702 |
| -0.114425643 | cg00317585 | 4  | 9.67E-06   | 0.55560029 |
| -0.114310879 | cg26076119 | 14 | 3.93E-08   | 0.38295083 |
| -0.114295553 | cg21077684 | 14 | 6.87E-07   | 0.27235799 |
| -0.114179558 | cg03510528 | 10 | 2.66E-06   | 0.43109699 |
| -0.114122268 | cg02164574 | 2  | 0.01291129 | 0.45457707 |
| -0.114073314 | cg15389025 | 12 | 0.00099617 | 0.47187361 |
| -0.114017331 | cg12417603 | 12 | 4.45E-08   | 0.2539895  |
| -0.113895179 | cg00161791 | 21 | 0.00146085 | 0.51153191 |
| -0.113837628 | cg21908664 | 1  | 0.00159038 | 0.49264777 |
| -0.113737217 | cg12443853 | 12 | 3.97E-09   | 0.39897338 |
| -0.113567805 | cg14779327 | 7  | 8.31E-07   | 0.76187027 |
| -0.11337854  | cg01871127 | 2  | 4.22E-11   | 0.28614256 |
| -0.113361291 | cg01413522 | 16 | 1.11E-08   | 0.26569507 |
| -0.113272988 | cg23101776 | 2  | 0.00031176 | 0.63079197 |
| -0.113208482 | cg15384383 | 10 | 8.94E-07   | 0.4655601  |
| -0.113161869 | cg22141235 | 11 | 2.58E-06   | 0.38947874 |
| -0.113124412 | cg15559833 | 2  | 0.01034197 | 0.40882386 |
| -0.113030098 | cg25516823 | 7  | 1.79E-05   | 0.5578128  |
| -0.113029014 | cg07613047 | 2  | 0.00036018 | 0.37275599 |
| -0.113007409 | cg02421824 | 12 | 0.00102536 | 0.69767866 |
| -0.112999698 | cg10598503 | 3  | 0.00038528 | 0.74587926 |
| -0.112739447 | cg09442613 | 12 | 5.14E-05   | 0.60621851 |
| -0.112525291 | cg11646762 | 5  | 3.48E-07   | 0.68041754 |
| -0.112465707 | cg11236727 | 2  | 8.87E-06   | 0.30558878 |
| -0.112427179 | cg13117164 | 4  | 9.52E-06   | 0.74214982 |
| -0.112393558 | cg03281981 | 12 | 0.00346725 | 0.3250857  |
| -0.112390727 | cg05678033 | 12 | 9.87E-07   | 0.80811491 |

|              |            |    |            |            |
|--------------|------------|----|------------|------------|
| -0.112351158 | cg23262036 | 7  | 0.00123678 | 0.6313977  |
| -0.112280895 | cg00709966 | 7  | 0.00157112 | 0.84189653 |
| -0.112227189 | cg08281415 | 16 | 6.67E-05   | 0.61272709 |
| -0.112223764 | cg17874109 | 16 | 0.00285416 | 0.65943453 |
| -0.112150044 | cg00095859 | 7  | 1.43E-09   | 0.41382325 |
| -0.112094984 | cg07175255 | 10 | 3.14E-05   | 0.65820555 |
| -0.111990216 | cg02202923 | 10 | 0.00040298 | 0.6830547  |
| -0.11176856  | cg22336669 | 12 | 0.00085497 | 0.64737603 |
| -0.111726002 | cg07313701 | 1  | 2.35E-08   | 0.65960964 |
| -0.111660275 | cg06770878 | 2  | 2.55E-05   | 0.4151005  |
| -0.111585107 | cg14770102 | 11 | 0.0001293  | 0.37512542 |
| -0.111538004 | cg02563349 | 12 | 3.24E-08   | 0.69440271 |
| -0.111536497 | cg27657363 | 22 | 5.98E-05   | 0.54191505 |
| -0.111532132 | cg09093150 | 5  | 1.03E-08   | 0.56405257 |
| -0.111518361 | cg09729012 | 3  | 0.00287713 | 0.39394052 |
| -0.111482466 | cg02958014 | 12 | 7.06E-09   | 0.464974   |
| -0.111427601 | cg16359424 | 10 | 2.39E-08   | 0.78241066 |
| -0.111330102 | cg02958634 | 2  | 7.07E-08   | 0.26978131 |
| -0.111329284 | cg18093372 | 2  | 7.12E-07   | 0.28152992 |
| -0.111205957 | cg24455158 | 7  | 8.48E-06   | 0.7690548  |
| -0.11119758  | cg02646251 | 10 | 1.45E-08   | 0.60547118 |
| -0.111170745 | cg18436984 | 7  | 0.01134754 | 0.71613946 |
| -0.111069219 | cg17677490 | 10 | 0.00013579 | 0.39174133 |
| -0.111019249 | cg27360992 | 22 | 0.00601589 | 0.4804133  |
| -0.110890551 | cg17966560 | 1  | 1.03E-12   | 0.31719964 |
| -0.110830865 | cg26449119 | 15 | 1.30E-07   | 0.43881375 |
| -0.110821718 | cg01394884 | 4  | 0.00015864 | 0.38149799 |
| -0.110803709 | cg10520672 | 16 | 4.90E-05   | 0.31718786 |
| -0.11073468  | cg09505233 | 10 | 0.00039305 | 0.6394464  |
| -0.110728168 | cg03827835 | 5  | 1.09E-07   | 0.68964582 |
| -0.110681915 | cg13261306 | 18 | 5.97E-11   | 0.81462389 |
| -0.110672499 | cg25771113 | 3  | 3.05E-05   | 0.75171495 |
| -0.11057913  | cg24527591 | 3  | 1.38E-05   | 0.44770525 |
| -0.110519697 | cg12363472 | 6  | 8.52E-05   | 0.47982915 |
| -0.110400077 | cg20421940 | 6  | 0.00256462 | 0.55634209 |
| -0.110369198 | cg19541916 | 2  | 2.42E-05   | 0.35732148 |
| -0.110215959 | cg01529365 | 12 | 3.64E-06   | 0.22421924 |
| -0.110207231 | cg09690449 | 4  | 6.87E-06   | 0.68830383 |
| -0.110151346 | cg02916283 | 14 | 3.20E-10   | 0.78901342 |
| -0.110116539 | cg09941406 | 12 | 4.27E-10   | 0.2269921  |
| -0.110076955 | cg08820025 | 22 | 9.56E-09   | 0.43942349 |
| -0.110032128 | cg16560272 | 14 | 1.11E-14   | 0.82061746 |
| -0.110009091 | cg16658616 | 16 | 1.15E-06   | 0.76465411 |
| -0.109919918 | cg21106695 | 14 | 1.72E-08   | 0.80273759 |
| -0.109887893 | cg14580747 | 3  | 0.00820633 | 0.50017518 |
| -0.109816596 | cg11467506 | 7  | 6.48E-05   | 0.5788752  |

|              |            |    |            |            |
|--------------|------------|----|------------|------------|
| -0.10967501  | cg15516052 | 11 | 1.33E-05   | 0.5353867  |
| -0.109671394 | cg26118358 | 14 | 0.0095028  | 0.5941773  |
| -0.109655547 | cg04615460 | 12 | 3.26E-08   | 0.50111924 |
| -0.109648974 | cg04075986 | 7  | 3.41E-05   | 0.48166702 |
| -0.1096064   | cg17082026 | 13 | 5.47E-05   | 0.68102083 |
| -0.10947083  | cg25461801 | 13 | 5.47E-07   | 0.57879039 |
| -0.109432636 | cg06597413 | 11 | 1.30E-05   | 0.60680627 |
| -0.109418141 | cg06957447 | 14 | 1.67E-05   | 0.611848   |
| -0.109415878 | cg18077580 | 7  | 8.98E-08   | 0.77729481 |
| -0.109334405 | cg19633390 | 13 | 1.72E-06   | 0.55246314 |
| -0.109275929 | cg12474686 | 10 | 1.43E-11   | 0.82824337 |
| -0.109268538 | cg00465247 | 13 | 0.0002568  | 0.53538756 |
| -0.109263979 | cg20328167 | 1  | 2.62E-08   | 0.55650973 |
| -0.10924252  | cg02938414 | 4  | 9.82E-14   | 0.31110097 |
| -0.109197216 | cg06217230 | 4  | 4.34E-08   | 0.89616258 |
| -0.109165503 | cg09524658 | 3  | 1.95E-05   | 0.45059822 |
| -0.109062029 | cg02651190 | 21 | 9.91E-06   | 0.51112244 |
| -0.109036223 | cg20208979 | 6  | 0.00041051 | 0.56278664 |
| -0.109001972 | cg19662895 | 14 | 9.90E-07   | 0.5183157  |
| -0.108743073 | cg11034978 | 11 | 1.60E-07   | 0.49168127 |
| -0.108671805 | cg17837192 | 2  | 4.98E-06   | 0.71164963 |
| -0.108664411 | cg18790325 | 12 | 1.49E-06   | 0.56990868 |
| -0.108662222 | cg19129687 | 13 | 7.36E-07   | 0.69175415 |
| -0.108613298 | cg13018639 | 14 | 3.25E-05   | 0.72443322 |
| -0.108533324 | cg13641317 | 3  | 1.54E-09   | 0.72286864 |
| -0.108490188 | cg14508405 | 2  | 3.80E-09   | 0.51332647 |
| -0.108440024 | cg16069079 | 15 | 0.00408379 | 0.76935876 |
| -0.108424958 | cg16684184 | 5  | 0.01488383 | 0.69863429 |
| -0.108404718 | cg11667061 | 14 | 0.00577203 | 0.52253463 |
| -0.108388851 | cg11654321 | 12 | 2.95E-10   | 0.83649596 |
| -0.108280492 | cg06934774 | 7  | 0.00157103 | 0.85691026 |
| -0.108218294 | cg06194070 | 9  | 0.00135355 | 0.61846204 |
| -0.108209932 | cg17511968 | 2  | 1.55E-07   | 0.71385788 |
| -0.108090155 | cg06228857 | 15 | 2.99E-05   | 0.57964065 |
| -0.108063463 | cg07734975 | 11 | 1.15E-05   | 0.59261362 |
| -0.108061338 | cg09239705 | 11 | 8.20E-07   | 0.64676851 |
| -0.108033662 | cg06300264 | 16 | 1.65E-08   | 0.70307015 |
| -0.107954975 | cg20421446 | 6  | 7.86E-09   | 0.87063253 |
| -0.107941375 | cg20248163 | 11 | 2.33E-11   | 0.5193902  |
| -0.107873648 | cg10454327 | 16 | 0.00036111 | 0.72995308 |
| -0.107823776 | cg09113474 | 6  | 1.81E-09   | 0.88549467 |
| -0.107810487 | cg23779604 | 7  | 7.97E-05   | 0.32585945 |
| -0.107804363 | cg17077610 | 10 | 0.03361283 | 0.60085918 |
| -0.107694291 | cg12828729 | 5  | 4.29E-06   | 0.48961663 |
| -0.107675694 | cg22063206 | 15 | 1.30E-09   | 0.58657588 |
| -0.107540024 | cg14082061 | 10 | 3.15E-09   | 0.64267437 |

|              |            |    |            |            |
|--------------|------------|----|------------|------------|
| -0.107370283 | cg03318593 | 2  | 3.67E-11   | 0.35510331 |
| -0.107333343 | cg18064824 | 2  | 1.03E-10   | 0.58238994 |
| -0.107276932 | cg11711501 | 8  | 2.08E-12   | 0.6343408  |
| -0.107267008 | cg14229071 | 15 | 3.97E-14   | 0.84661442 |
| -0.107139046 | cg10263737 | 16 | 7.95E-07   | 0.54717061 |
| -0.107131428 | cg15073631 | 13 | 1.69E-05   | 0.45699423 |
| -0.107105006 | cg10244364 | 1  | 0.00014921 | 0.40926662 |
| -0.107078714 | cg09248694 | 11 | 0.00262399 | 0.58797612 |
| -0.107027977 | cg17030488 | 12 | 7.30E-05   | 0.5790102  |
| -0.10672759  | cg00574742 | 5  | 1.02E-05   | 0.39335187 |
| -0.106674355 | cg07745344 | 8  | 9.41E-11   | 0.73365915 |
| -0.106511639 | cg10595547 | 10 | 2.91E-05   | 0.39200112 |
| -0.106471833 | cg22725830 | 13 | 9.65E-06   | 0.54285378 |
| -0.106429453 | cg19994384 | 10 | 1.51E-06   | 0.48973257 |
| -0.106357146 | cg21165255 | 9  | 1.15E-06   | 0.72109261 |
| -0.106354133 | cg07213685 | 5  | 3.99E-10   | 0.53777028 |
| -0.106295523 | cg26115531 | 12 | 2.60E-13   | 0.47439602 |
| -0.106277883 | cg14977433 | 4  | 3.31E-07   | 0.53223209 |
| -0.106269555 | cg17202717 | 7  | 0.00068564 | 0.52750582 |
| -0.106255697 | cg03274671 | 11 | 2.03E-05   | 0.60951301 |
| -0.106219769 | cg24725789 | 10 | 1.88E-05   | 0.33869362 |
| -0.106151784 | cg06993255 | 8  | 1.07E-08   | 0.49270532 |
| -0.10604272  | cg19124424 | 7  | 2.36E-07   | 0.55877382 |
| -0.10594274  | cg04536588 | 10 | 5.24E-05   | 0.6209949  |
| -0.1059423   | cg19747745 | 21 | 7.10E-06   | 0.61134274 |
| -0.105803686 | cg15808063 | 2  | 7.21E-06   | 0.54934989 |
| -0.105761141 | cg13807254 | 9  | 9.91E-06   | 0.38099897 |
| -0.105734963 | cg05563558 | 12 | 6.03E-09   | 0.61655384 |
| -0.105616271 | cg17431023 | 7  | 2.70E-08   | 0.4733045  |
| -0.10561107  | cg05219726 | 13 | 0.00067559 | 0.76181942 |
| -0.105595491 | cg04927345 | 8  | 4.38E-10   | 0.73458302 |
| -0.105564151 | cg25394782 | 6  | 6.56E-06   | 0.68007247 |
| -0.105504031 | cg16790844 | 2  | 2.91E-09   | 0.76044817 |
| -0.10549931  | cg17976588 | 5  | 6.38E-05   | 0.64962421 |
| -0.105408984 | cg20952257 | 5  | 8.04E-05   | 0.47038367 |
| -0.105397282 | cg25036357 | 8  | 3.76E-17   | 0.89886451 |
| -0.105340911 | cg01933477 | 5  | 4.79E-10   | 0.7831572  |
| -0.105270825 | cg03373714 | 2  | 0.00019609 | 0.35668862 |
| -0.105151077 | cg03092680 | 6  | 1.88E-06   | 0.38029216 |
| -0.105142417 | cg24720008 | 10 | 6.69E-05   | 0.48407518 |
| -0.105103762 | cg05521150 | 4  | 8.82E-06   | 0.5985549  |
| -0.105101224 | cg06710259 | 5  | 2.31E-06   | 0.47428937 |
| -0.105041668 | cg04201253 | 2  | 1.14E-11   | 0.56277617 |
| -0.105001728 | cg13768137 | 2  | 3.50E-06   | 0.31237781 |
| -0.104986872 | cg18798289 | 5  | 1.42E-10   | 0.41012582 |
| -0.104980711 | cg13575139 | 3  | 1.70E-07   | 0.33887028 |

|              |            |    |            |            |
|--------------|------------|----|------------|------------|
| -0.104961226 | cg02486332 | 12 | 4.45E-13   | 0.42358496 |
| -0.1049536   | cg25343618 | 1  | 2.49E-05   | 0.3727321  |
| -0.104857117 | cg12584528 | 17 | 4.82E-06   | 0.64682162 |
| -0.104809916 | cg14445366 | 17 | 6.33E-09   | 0.53072422 |
| -0.104776028 | cg23480730 | 14 | 0.00074411 | 0.717537   |
| -0.104722307 | cg14118946 | 9  | 1.90E-06   | 0.53121212 |
| -0.104673947 | cg01510218 | 22 | 2.88E-09   | 0.51356675 |
| -0.104672129 | cg09837088 | 10 | 1.24E-11   | 0.67509221 |
| -0.104610202 | cg06544162 | 6  | 6.86E-08   | 0.52698165 |
| -0.104575435 | cg17136073 | 13 | 1.52E-05   | 0.65162646 |
| -0.104498797 | cg23758252 | 10 | 3.50E-06   | 0.69199998 |
| -0.104457309 | cg26104083 | 6  | 3.14E-07   | 0.29638602 |
| -0.104444879 | cg25156915 | 4  | 9.28E-06   | 0.38409488 |
| -0.104227036 | cg21240684 | 2  | 4.90E-09   | 0.65259006 |
| -0.104190257 | cg22912997 | 12 | 1.51E-10   | 0.44078913 |
| -0.104153651 | cg09380805 | 3  | 4.44E-06   | 0.63457595 |
| -0.104136334 | cg16695576 | 6  | 6.40E-06   | 0.31593934 |
| -0.104099703 | cg08069287 | 11 | 8.38E-08   | 0.49368615 |
| -0.104016625 | cg00532399 | 5  | 4.39E-07   | 0.58164555 |
| -0.104008141 | cg09722315 | 6  | 0.00051587 | 0.60103603 |
| -0.10397567  | cg13175329 | 6  | 1.78E-07   | 0.6326753  |
| -0.103969274 | cg02141498 | 16 | 0.00046058 | 0.57333646 |
| -0.103952405 | cg16282618 | 11 | 6.08E-11   | 0.69448382 |
| -0.103880066 | cg17787288 | 2  | 6.90E-07   | 0.64662817 |
| -0.103868811 | cg12613020 | 5  | 1.82E-07   | 0.53421294 |
| -0.103813736 | cg17335387 | 5  | 7.87E-05   | 0.46161699 |
| -0.103813447 | cg26362263 | 6  | 4.24E-09   | 0.47753467 |
| -0.103772954 | cg07007165 | 17 | 1.29E-15   | 0.84085757 |
| -0.103772885 | cg17811608 | 2  | 6.85E-07   | 0.48686283 |
| -0.103760147 | cg20852250 | 3  | 8.82E-07   | 0.44895295 |
| -0.103744286 | cg00095523 | 12 | 0.00132374 | 0.44084002 |
| -0.10370166  | cg11772020 | 6  | 2.11E-07   | 0.44621031 |
| -0.103623699 | cg19837174 | 10 | 5.59E-09   | 0.37464529 |
| -0.103597344 | cg02544658 | 21 | 8.03E-05   | 0.47316994 |
| -0.103573229 | cg22727965 | 7  | 6.12E-06   | 0.417427   |
| -0.103564874 | cg18640514 | 7  | 2.10E-05   | 0.47939227 |
| -0.103491727 | cg21507299 | 5  | 6.76E-05   | 0.73347054 |
| -0.103387229 | cg06876766 | 12 | 2.00E-11   | 0.71755301 |
| -0.103370072 | cg23640925 | 1  | 3.31E-07   | 0.48080143 |
| -0.103351249 | cg07834841 | 10 | 4.88E-11   | 0.71529001 |
| -0.103336497 | cg24025721 | 7  | 2.50E-10   | 0.47074315 |
| -0.103328154 | cg11438134 | 21 | 1.37E-08   | 0.80741835 |
| -0.103301624 | cg00369181 | 2  | 3.30E-09   | 0.60448132 |
| -0.103278945 | cg05876824 | 6  | 4.47E-07   | 0.69269359 |
| -0.10323699  | cg03256597 | 19 | 6.42E-15   | 0.70650762 |
| -0.103219983 | cg15996644 | 12 | 5.54E-12   | 0.53177006 |



|              |            |    |            |            |
|--------------|------------|----|------------|------------|
| -0.10321467  | cg05801374 | 1  | 1.05E-07   | 0.58710544 |
| -0.103196615 | cg04700055 | 5  | 9.95E-07   | 0.60681963 |
| -0.103174933 | cg06918928 | 12 | 6.45E-07   | 0.41242697 |
| -0.103109144 | cg16531181 | 10 | 2.47E-08   | 0.80320798 |
| -0.103097793 | cg12756312 | 11 | 3.41E-09   | 0.83959556 |
| -0.103042473 | cg15198736 | 5  | 8.21E-05   | 0.77218322 |
| -0.102972367 | cg11202887 | 13 | 2.64E-07   | 0.51229245 |
| -0.102971534 | cg03677126 | 5  | 7.09E-06   | 0.61146562 |
| -0.102944296 | cg11928184 | 6  | 2.55E-08   | 0.74151894 |
| -0.102889831 | cg13654797 | 12 | 2.21E-12   | 0.45563198 |
| -0.102889161 | cg04697265 | 11 | 9.83E-05   | 0.40616183 |
| -0.102855944 | cg13038618 | 14 | 3.60E-08   | 0.38410859 |
| -0.10285261  | cg12799790 | 10 | 9.85E-08   | 0.57971657 |
| -0.102741592 | cg00310410 | 2  | 9.15E-11   | 0.37100157 |
| -0.102667597 | cg22049902 | 6  | 6.98E-09   | 0.87317572 |
| -0.102658215 | cg20463533 | 10 | 3.07E-07   | 0.76737661 |
| -0.102648563 | cg08663890 | 1  | 6.98E-06   | 0.57988234 |
| -0.102645429 | cg16642063 | 2  | 1.12E-10   | 0.70922625 |
| -0.102598716 | cg01043845 | 2  | 8.97E-07   | 0.82648925 |
| -0.102557391 | cg09221159 | 10 | 0.00015007 | 0.34898974 |
| -0.102537463 | cg07201717 | 1  | 2.74E-06   | 0.52852464 |
| -0.102463383 | cg26195356 | 5  | 1.02E-08   | 0.40051374 |
| -0.102280783 | cg27152312 | 7  | 1.88E-07   | 0.61342695 |
| -0.102273321 | cg13934308 | 12 | 0.00204683 | 0.42094591 |
| -0.102191089 | cg14569644 | 12 | 1.30E-06   | 0.2955035  |
| -0.101867746 | cg16498504 | 11 | 1.20E-10   | 0.84224128 |
| -0.101819264 | cg25160899 | 12 | 1.32E-10   | 0.3314541  |
| -0.101713836 | cg01519253 | 12 | 8.57E-13   | 0.24370151 |
| -0.101692274 | cg04562589 | 4  | 3.15E-08   | 0.57266687 |
| -0.101689705 | cg05970547 | 4  | 1.39E-09   | 0.86616669 |
| -0.101675453 | cg04495313 | 4  | 2.22E-05   | 0.42430772 |
| -0.101647547 | cg19857407 | 7  | 1.33E-09   | 0.64704827 |
| -0.101629007 | cg10787919 | 3  | 9.33E-07   | 0.52857587 |
| -0.101547574 | cg00664697 | 16 | 7.00E-06   | 0.36202472 |
| -0.101472045 | cg06878548 | 8  | 1.31E-11   | 0.68189732 |
| -0.101459606 | cg13523731 | 17 | 0.00052021 | 0.54994555 |
| -0.101391299 | cg03223172 | 2  | 2.42E-06   | 0.51525712 |
| -0.101381283 | cg20219053 | 11 | 3.35E-06   | 0.46217939 |
| -0.101348966 | cg27523087 | 10 | 1.55E-07   | 0.44094649 |
| -0.101325086 | cg03429569 | 2  | 5.27E-05   | 0.61331481 |
| -0.101236239 | cg23322546 | 2  | 6.48E-13   | 0.85635415 |
| -0.101221586 | cg15806306 | 11 | 4.73E-06   | 0.47897377 |
| -0.101201521 | cg18472549 | 8  | 8.63E-06   | 0.75576783 |
| -0.10115218  | cg25930440 | 8  | 1.34E-12   | 0.45836035 |
| -0.101106471 | cg15294263 | 21 | 1.83E-07   | 0.49196456 |
| -0.101084937 | cg07725206 | 1  | 2.43E-10   | 0.35686985 |

|              |            |    |            |            |
|--------------|------------|----|------------|------------|
| -0.101046882 | cg10017260 | 10 | 0.00013399 | 0.63571229 |
| -0.101037494 | cg01947769 | 1  | 1.20E-08   | 0.49657019 |
| -0.101015305 | cg25575845 | 7  | 4.52E-08   | 0.67210741 |
| -0.100989529 | cg12501995 | 7  | 1.21E-07   | 0.66484736 |
| -0.100987687 | cg20940675 | 1  | 1.44E-05   | 0.45904293 |
| -0.10090743  | cg09113483 | 1  | 1.43E-07   | 0.34005061 |
| -0.100858462 | cg00790071 | 2  | 8.17E-11   | 0.6789274  |
| -0.100758343 | cg14260169 | 10 | 0.00112351 | 0.47620136 |
| -0.100754786 | cg16809762 | 16 | 0.00019064 | 0.47058161 |
| -0.100748613 | cg13081526 | 6  | 0.00018932 | 0.43057948 |
| -0.100746781 | cg04111577 | 11 | 3.48E-05   | 0.5856209  |
| -0.100693898 | cg05832070 | 7  | 1.39E-13   | 0.64348379 |
| -0.100663371 | cg26963632 | 16 | 3.29E-09   | 0.50271307 |
| -0.100658299 | cg10809958 | 7  | 0.00363931 | 0.62713128 |
| -0.100647291 | cg09214892 | 16 | 2.21E-07   | 0.79353182 |
| -0.100628791 | cg22673064 | 5  | 2.85E-06   | 0.38998671 |
| -0.100532179 | cg19517470 | 6  | 1.88E-07   | 0.55295726 |
| -0.10053093  | cg02305412 | 1  | 2.01E-06   | 0.63995904 |
| -0.100498415 | cg10795646 | 1  | 2.25E-06   | 0.37141497 |
| -0.100418066 | cg00604112 | 7  | 0.00046071 | 0.67121483 |
| -0.100360753 | cg08601192 | 10 | 4.00E-08   | 0.79027271 |
| -0.100342323 | cg11719362 | 7  | 1.49E-06   | 0.38240817 |
| -0.100342085 | cg24390428 | 17 | 7.25E-09   | 0.75532589 |
| -0.100338436 | cg09791621 | 16 | 1.06E-08   | 0.52336721 |
| -0.100283516 | cg27614376 | 3  | 1.38E-05   | 0.58867007 |
| -0.100181411 | cg19257832 | 11 | 1.25E-14   | 0.37677816 |
| -0.100162821 | cg15772157 | 10 | 0.00090156 | 0.79537705 |
| -0.100152317 | cg14552508 | 2  | 9.54E-12   | 0.63170579 |
| -0.100121785 | cg04869006 | 10 | 2.06E-10   | 0.45293719 |
|              | cg15258447 | 10 | 2.50E-07   | 0.57436018 |
|              | cg01984854 | 16 | 5.11E-07   | 0.52698495 |
|              | cg01355932 | 8  | 5.85E-10   | 0.65976757 |
|              | cg12397584 | 12 | 1.23E-16   | 0.92058802 |
|              | cg00879824 | 6  | 1.28E-06   | 0.57105804 |
|              | cg19730699 | 10 | 6.66E-10   | 0.47858757 |
|              | cg02393107 | 1  | 1.10E-11   | 0.36959525 |
|              | cg05545441 | 4  | 2.23E-09   | 0.34460002 |
|              | cg12042203 | 8  | 4.78E-12   | 0.46670853 |
|              | cg22117825 | 4  | 4.97E-07   | 0.71286179 |
|              | cg24030485 | 13 | 1.34E-07   | 0.5902757  |
|              | cg23745444 | 12 | 2.51E-05   | 0.73911838 |
|              | cg00205813 | 3  | 0.02650564 | 0.74695639 |
|              | cg15512289 | 1  | 5.53E-08   | 0.45836412 |
|              | cg18890892 | 12 | 1.32E-08   | 0.79412783 |
|              | cg20037088 | 7  | 8.30E-11   | 0.44239517 |
|              | cg03652525 | 3  | 5.93E-07   | 0.51430174 |

|            |    |            |            |
|------------|----|------------|------------|
| cg27492584 | 17 | 7.58E-05   | 0.51181086 |
| cg13672200 | 12 | 6.96E-06   | 0.30835776 |
| cg13824319 | 11 | 1.51E-10   | 0.74442891 |
| cg23986620 | 2  | 1.11E-09   | 0.89643946 |
| cg20207443 | 3  | 4.12E-07   | 0.54471045 |
| cg16598508 | 16 | 2.74E-06   | 0.46541119 |
| cg12524338 | 4  | 0.0019696  | 0.7245709  |
| cg04213900 | 14 | 2.67E-09   | 0.74541104 |
| cg16155923 | 6  | 1.19E-08   | 0.59854177 |
| cg26343001 | 12 | 1.18E-05   | 0.55177882 |
| cg07782112 | 2  | 5.26E-06   | 0.39666879 |
| cg20982052 | 12 | 5.06E-11   | 0.78239357 |
| cg19763682 | 13 | 8.33E-09   | 0.71402538 |
| cg11002208 | 2  | 3.59E-05   | 0.56932935 |
| cg21297493 | 1  | 3.50E-15   | 0.34471496 |
| cg10096566 | 14 | 1.14E-13   | 0.42565025 |
| cg23332827 | 11 | 1.40E-08   | 0.54150034 |
| cg10987774 | 1  | 3.98E-12   | 0.81623888 |
| cg13291570 | 8  | 1.17E-07   | 0.37161657 |
| cg23314826 | 8  | 1.14E-14   | 0.84487825 |
| cg22784078 | 6  | 8.62E-10   | 0.57458076 |
| cg14434755 | 12 | 0.00031787 | 0.45508231 |
| cg26267388 | 2  | 7.63E-10   | 0.45680862 |
| cg14210817 | 13 | 3.14E-06   | 0.49824069 |
| cg21770800 | 6  | 4.08E-08   | 0.45169946 |
| cg27057027 | 7  | 4.95E-06   | 0.6148276  |
| cg01551013 | 14 | 5.09E-07   | 0.43638895 |
| cg09168808 | 12 | 9.29E-09   | 0.43638508 |
| cg08420370 | 4  | 2.53E-11   | 0.43886832 |
| cg21752211 | 7  | 1.03E-06   | 0.47075078 |
| cg07005778 | 4  | 1.57E-08   | 0.39238385 |
| cg17818471 | 2  | 6.66E-09   | 0.77125413 |
| cg02244233 | 10 | 5.44E-07   | 0.50440957 |
| cg00451491 | 2  | 1.27E-08   | 0.67834311 |
| cg19451167 | 7  | 3.12E-10   | 0.69999423 |
| cg09225462 | 6  | 7.78E-08   | 0.42001909 |
| cg17774672 | 7  | 3.30E-05   | 0.48623289 |
| cg24842815 | 8  | 1.74E-06   | 0.46356384 |
| cg03532904 | 12 | 1.41E-06   | 0.28548729 |
| cg12634245 | 6  | 2.67E-11   | 0.35047097 |
| cg24048949 | 19 | 6.80E-13   | 0.55722607 |
| cg14328408 | 9  | 7.14E-08   | 0.60162368 |
| cg21479131 | 12 | 9.27E-11   | 0.69449281 |
| cg18406000 | 6  | 2.96E-07   | 0.48018395 |
| cg19394510 | 12 | 1.12E-11   | 0.658826   |
| cg01834856 | 7  | 7.45E-08   | 0.73500783 |

|            |    |            |            |
|------------|----|------------|------------|
| cg19514381 | 7  | 1.17E-08   | 0.83387651 |
| cg18417901 | 11 | 4.88E-05   | 0.59744744 |
| cg00506828 | 4  | 3.50E-08   | 0.79138187 |
| cg15741354 | 8  | 1.96E-08   | 0.44864248 |
| cg17694351 | 7  | 0.00985648 | 0.69505794 |
| cg25473201 | 6  | 5.83E-09   | 0.59614968 |
| cg25278353 | 10 | 1.22E-09   | 0.75218997 |
| cg02694521 | 13 | 8.89E-11   | 0.74543492 |
| cg04492459 | 17 | 5.17E-06   | 0.56065452 |
| cg16388178 | 4  | 4.95E-06   | 0.74491015 |
| cg27638284 | 20 | 0.0002945  | 0.58990756 |
| cg08959182 | 5  | 2.23E-12   | 0.77523376 |
| cg25076459 | 7  | 2.46E-10   | 0.46119973 |
| cg08127108 | 2  | 3.32E-09   | 0.58263714 |
| cg25830548 | 6  | 8.23E-06   | 0.49943486 |
| cg10421739 | 6  | 2.03E-07   | 0.64380288 |
| cg13995497 | 2  | 2.09E-07   | 0.65648489 |
| cg14250846 | 14 | 3.65E-11   | 0.5489704  |
| cg17432647 | 5  | 4.98E-07   | 0.60909112 |
| cg19704630 | 17 | 2.40E-16   | 0.83866549 |
| cg16609260 | 12 | 2.42E-09   | 0.3675905  |
| cg07779423 | 5  | 1.11E-06   | 0.59029215 |
| cg01162224 | 16 | 7.84E-10   | 0.43601892 |
| cg17537347 | 6  | 3.17E-06   | 0.62791447 |
| cg06591613 | 5  | 2.23E-05   | 0.55682419 |
| cg20481247 | 10 | 2.52E-10   | 0.78789505 |
| cg05128922 | 12 | 2.75E-08   | 0.30348514 |
| cg11236841 | 4  | 8.81E-10   | 0.46126234 |
| cg11110759 | 14 | 3.88E-11   | 0.5038705  |
| cg04799980 | 2  | 1.20E-05   | 0.60364694 |
| cg08777421 | 7  | 2.12E-08   | 0.49512632 |
| cg05817443 | 13 | 4.98E-11   | 0.68188996 |
| cg15418593 | 14 | 5.89E-13   | 0.66396353 |
| cg13132497 | 15 | 0.00057677 | 0.75956804 |
| cg01863398 | 6  | 0.00076529 | 0.56790803 |
| cg09430738 | 3  | 1.41E-05   | 0.60779865 |
| cg05283379 | 7  | 7.28E-08   | 0.47921441 |
| cg05222995 | 12 | 2.03E-09   | 0.45532337 |
| cg23612072 | 17 | 9.11E-10   | 0.47449009 |
| cg10462643 | 6  | 8.14E-12   | 0.84975606 |
| cg26943056 | 5  | 3.78E-15   | 0.86438861 |
| cg26402435 | 4  | 3.55E-08   | 0.66193456 |
| cg13441766 | 5  | 3.91E-11   | 0.41262903 |
| cg06354392 | 2  | 2.44E-07   | 0.32638114 |
| cg18944451 | 2  | 1.43E-09   | 0.46088115 |
| cg00192220 | 16 | 1.24E-08   | 0.52577965 |

|            |    |            |            |
|------------|----|------------|------------|
| cg11543592 | 12 | 4.79E-09   | 0.4651475  |
| cg12504882 | 2  | 5.20E-17   | 0.56703275 |
| cg00238805 | 2  | 4.35E-13   | 0.76125601 |
| cg16016888 | 2  | 4.99E-06   | 0.84605182 |
| cg22877452 | 1  | 5.16E-08   | 0.43444585 |
| cg19907293 | 2  | 1.85E-07   | 0.68826811 |
| cg16469927 | 5  | 1.84E-05   | 0.58943078 |
| cg03130530 | 2  | 2.97E-09   | 0.63981471 |
| cg20906291 | 6  | 2.65E-12   | 0.42495226 |
| cg24360892 | 13 | 1.38E-09   | 0.48891732 |
| cg12219434 | 3  | 2.83E-10   | 0.43995255 |
| cg27250634 | 6  | 9.04E-09   | 0.6646446  |
| cg03383508 | 2  | 1.94E-10   | 0.43241312 |
| cg21800284 | 12 | 1.01E-06   | 0.56364893 |
| cg12310008 | 2  | 9.50E-09   | 0.61462576 |
| cg03510605 | 12 | 0.00016074 | 0.4807841  |
| cg15496956 | 1  | 2.07E-11   | 0.42193457 |
| cg00621247 | 5  | 1.45E-06   | 0.4767116  |
| cg14226702 | 9  | 1.10E-12   | 0.82112531 |
| cg03656290 | 4  | 0.00048001 | 0.44411762 |
| cg26606286 | 4  | 7.64E-05   | 0.59918198 |
| cg20232746 | 4  | 9.48E-07   | 0.67140127 |
| cg16987638 | 6  | 3.62E-07   | 0.47351813 |
| cg07937443 | 4  | 3.71E-11   | 0.38444834 |
| cg24488469 | 1  | 7.42E-11   | 0.46042179 |
| cg05505103 | 11 | 2.91E-06   | 0.63911477 |
| cg23348270 | 2  | 1.54E-10   | 0.32831095 |
| cg11551216 | 12 | 5.52E-07   | 0.47327955 |
| cg23627948 | 7  | 2.53E-06   | 0.54631036 |
| cg18017482 | 1  | 2.25E-06   | 0.59751852 |
| cg08128274 | 1  | 8.09E-11   | 0.46554708 |
| cg00723994 | 12 | 6.75E-06   | 0.57431454 |
| cg26471674 | 12 | 2.02E-08   | 0.41787513 |
| cg08818377 | 7  | 1.22E-08   | 0.62244196 |
| cg10227331 | 1  | 2.62E-08   | 0.37736598 |
| cg05000761 | 18 | 6.34E-05   | 0.69396016 |
| cg15056288 | 2  | 6.85E-07   | 0.35911237 |
| cg14211915 | 9  | 1.43E-08   | 0.59771753 |
| cg25831071 | 11 | 2.89E-11   | 0.54619292 |
| cg13981380 | 11 | 2.42E-06   | 0.56931292 |
| cg05509820 | 6  | 0.00112298 | 0.58470223 |
| cg11272491 | 2  | 3.98E-07   | 0.77790238 |
| cg05971894 | 12 | 5.86E-10   | 0.4175098  |
| cg14298457 | 2  | 5.73E-08   | 0.87441139 |
| cg02467382 | 8  | 3.66E-10   | 0.70475991 |
| cg12758485 | 6  | 4.67E-07   | 0.46849105 |

|            |    |            |            |
|------------|----|------------|------------|
| cg14987787 | 12 | 1.19E-05   | 0.499806   |
| cg08033722 | 12 | 2.29E-09   | 0.49512614 |
| cg08203788 | 7  | 3.42E-07   | 0.46551313 |
| cg09003509 | 12 | 5.86E-12   | 0.78065306 |
| cg04961582 | 14 | 9.11E-09   | 0.62198407 |
| cg13998223 | 9  | 1.29E-05   | 0.58050855 |
| cg16063018 | 12 | 9.72E-11   | 0.63624074 |
| cg00786305 | 2  | 1.81E-12   | 0.3884656  |
| cg20139336 | 6  | 4.31E-11   | 0.38174423 |
| cg04672622 | 12 | 2.54E-12   | 0.79059456 |
| cg25121513 | 7  | 3.31E-07   | 0.56952855 |
| cg20643952 | 12 | 3.04E-14   | 0.40334249 |
| cg07460010 | 2  | 6.25E-05   | 0.61029583 |
| cg21336435 | 12 | 1.21E-12   | 0.7220371  |
| cg22344631 | 2  | 1.77E-09   | 0.55414198 |
| cg25149122 | 18 | 2.06E-09   | 0.62348588 |
| cg22364200 | 12 | 3.55E-17   | 0.81176075 |
| cg06800658 | 5  | 4.67E-13   | 0.5801034  |
| cg20538322 | 12 | 1.17E-10   | 0.36867642 |
| cg21413947 | 1  | 2.22E-13   | 0.76190753 |
| cg13031611 | 12 | 1.79E-07   | 0.4030258  |
| cg06951265 | 10 | 1.15E-12   | 0.70209248 |
| cg13707224 | 9  | 1.58E-10   | 0.76478053 |
| cg22934308 | 2  | 5.58E-12   | 0.84845217 |
| cg18366169 | 5  | 6.19E-08   | 0.74601432 |
| cg19308375 | 2  | 8.54E-12   | 0.447017   |
| cg21837192 | 12 | 2.86E-14   | 0.55166093 |
| cg17870997 | 2  | 2.50E-07   | 0.6273074  |
| cg04434244 | 6  | 7.27E-12   | 0.68608167 |
| cg07584582 | 22 | 1.37E-06   | 0.60125853 |
| cg09862148 | 6  | 1.04E-07   | 0.41576153 |
| cg06212297 | 16 | 3.47E-14   | 0.80996723 |
| cg25402979 | 12 | 6.80E-18   | 0.89092936 |
| cg24938372 | 6  | 2.08E-07   | 0.71249535 |
| cg06390651 | 2  | 1.46E-11   | 0.72214081 |
| cg19738283 | 2  | 1.78E-12   | 0.35264742 |
| cg23226249 | 1  | 2.44E-07   | 0.5537253  |
| cg20935741 | 2  | 1.14E-05   | 0.41716222 |
| cg04939026 | 7  | 8.25E-07   | 0.81178586 |
| cg18054526 | 6  | 3.07E-07   | 0.56206453 |
| cg02164225 | 2  | 5.23E-14   | 0.40464954 |
| cg10134833 | 6  | 4.47E-11   | 0.72385585 |
| cg13449463 | 2  | 4.97E-11   | 0.61274659 |
| cg11634496 | 11 | 1.06E-06   | 0.67461851 |
| cg22327646 | 12 | 6.56E-13   | 0.3548484  |
| cg14947010 | 16 | 0.00015969 | 0.71112118 |

|            |    |          |            |
|------------|----|----------|------------|
| cg04935434 | 2  | 7.69E-16 | 0.50821777 |
| cg04206219 | 6  | 3.44E-07 | 0.53194728 |
| cg06566775 | 5  | 2.94E-09 | 0.68079762 |
| cg25833587 | 6  | 2.06E-09 | 0.66028944 |
| cg03078363 | 12 | 3.17E-13 | 0.65889725 |
| cg20346503 | 2  | 9.10E-09 | 0.40647294 |
| cg15814150 | 4  | 7.51E-09 | 0.85907168 |
| cg02824888 | 12 | 6.81E-07 | 0.43506278 |
| cg16911810 | 2  | 3.30E-10 | 0.61897302 |
| cg04058685 | 6  | 2.51E-07 | 0.54200608 |
| cg11256956 | 12 | 5.53E-11 | 0.54593006 |
| cg13306522 | 5  | 8.64E-06 | 0.71265503 |
| cg03498081 | 16 | 1.23E-06 | 0.49610498 |
| cg25137403 | 2  | 2.42E-11 | 0.50036767 |
| cg11965409 | 2  | 3.06E-14 | 0.74096664 |
| cg24691910 | 12 | 1.01E-06 | 0.40017478 |
| cg02571636 | 4  | 9.43E-10 | 0.59525251 |
| cg11569159 | 12 | 1.71E-08 | 0.39858751 |
| cg19629079 | 12 | 9.78E-10 | 0.61591635 |
| cg07889827 | 10 | 1.77E-10 | 0.62448728 |
| cg03113254 | 4  | 1.78E-06 | 0.58733668 |
| cg23201188 | 3  | 6.28E-10 | 0.65455235 |
| cg17635080 | 12 | 9.48E-10 | 0.67582911 |
| cg00992850 | 7  | 3.31E-06 | 0.55955332 |
| cg08254359 | 12 | 7.14E-12 | 0.85848242 |
| cg14994060 | 5  | 1.20E-07 | 0.55791727 |
| cg07209009 | 2  | 5.30E-10 | 0.7501733  |
| cg05525812 | 2  | 8.46E-12 | 0.79188655 |
| cg05322837 | 17 | 2.50E-10 | 0.56300703 |
| cg21170682 | 11 | 6.44E-13 | 0.59406092 |
| cg18183892 | 2  | 5.43E-12 | 0.51250596 |
| cg26463328 | 4  | 1.29E-10 | 0.88022408 |
| cg16912563 | 10 | 1.65E-06 | 0.70040655 |
| cg18573327 | 12 | 1.98E-06 | 0.48616296 |
| cg11302945 | 12 | 1.22E-10 | 0.54622773 |
| cg10236245 | 14 | 5.21E-09 | 0.44756489 |
| cg02862505 | 12 | 8.78E-10 | 0.41649689 |
| cg21381594 | 12 | 4.92E-16 | 0.39536719 |
| cg00679731 | 2  | 9.48E-07 | 0.73653208 |
| cg00119279 | 4  | 1.82E-10 | 0.43870875 |
| cg03218797 | 12 | 2.81E-08 | 0.51233836 |
| cg10330950 | 2  | 5.18E-11 | 0.55885134 |
| cg02327563 | 2  | 9.39E-10 | 0.74268978 |
| cg20307896 | 12 | 1.41E-08 | 0.40990496 |
| cg02960938 | 2  | 7.60E-09 | 0.71963028 |
| cg18712566 | 13 | 2.58E-12 | 0.71340807 |

|            |    |          |            |
|------------|----|----------|------------|
| cg23424407 | 12 | 3.00E-07 | 0.49783449 |
| cg00507008 | 12 | 3.98E-06 | 0.45491996 |
| cg08237565 | 8  | 9.29E-14 | 0.80632569 |
| cg11444009 | 4  | 9.65E-13 | 0.59489805 |
| cg19091036 | 12 | 2.22E-13 | 0.40931843 |
| cg15584084 | 4  | 7.58E-12 | 0.7014206  |
| cg08091328 | 12 | 6.64E-09 | 0.42276519 |
| cg08355659 | 12 | 4.84E-14 | 0.82602978 |
| cg18450319 | 7  | 8.47E-19 | 0.52787547 |
| cg10932916 | 5  | 5.22E-13 | 0.68989427 |
| cg10143823 | 14 | 1.81E-10 | 0.67623196 |
| cg06929583 | 10 | 3.62E-14 | 0.60493995 |
| cg04153838 | 12 | 3.20E-06 | 0.46238887 |
| cg01471264 | 2  | 8.14E-09 | 0.59249681 |
| cg10160614 | 2  | 1.04E-11 | 0.69900373 |
| cg02506248 | 12 | 4.31E-11 | 0.57722897 |
| cg11433866 | 12 | 2.76E-07 | 0.53716417 |
| cg08548444 | 4  | 8.30E-12 | 0.82258928 |
| cg14940165 | 2  | 5.18E-11 | 0.77170039 |
| cg04392715 | 8  | 1.07E-13 | 0.71392581 |
| cg01471428 | 12 | 4.58E-11 | 0.65046961 |
| cg11412853 | 12 | 1.92E-06 | 0.46172661 |
| cg14156498 | 9  | 2.59E-11 | 0.63918671 |
| cg01269702 | 2  | 1.82E-11 | 0.61739655 |
| cg05669418 | 2  | 1.19E-13 | 0.72876227 |
| cg22773899 | 12 | 5.41E-15 | 0.39842536 |
| cg20249210 | 12 | 1.18E-11 | 0.76530672 |
| cg23786812 | 7  | 3.68E-18 | 0.83062161 |
| cg18376288 | 1  | 8.81E-10 | 0.50527019 |
| cg23858650 | 12 | 2.41E-11 | 0.54483293 |
| cg14595617 | 2  | 1.49E-12 | 0.60223694 |
| cg18290739 | 6  | 2.68E-12 | 0.75043754 |
| cg06912966 | 12 | 2.23E-07 | 0.38696093 |
| cg09601912 | 2  | 1.08E-12 | 0.55554903 |
| cg18470839 | 12 | 1.04E-08 | 0.43428515 |
| cg24415066 | 4  | 1.97E-09 | 0.7860791  |
| cg25916282 | 2  | 5.80E-13 | 0.79999165 |
| cg08264835 | 1  | 1.83E-16 | 0.76800108 |
| cg25033380 | 12 | 6.32E-08 | 0.6186447  |
| cg19575753 | 5  | 4.57E-07 | 0.69893982 |
| cg06625934 | 14 | 2.53E-09 | 0.47269907 |
| cg04032071 | 12 | 2.18E-14 | 0.46033751 |
| cg04528829 | 12 | 7.61E-09 | 0.50374931 |
| cg15990972 | 2  | 2.96E-08 | 0.79396841 |
| cg19128113 | 4  | 4.29E-10 | 0.81427025 |
| cg03401519 | 2  | 4.66E-13 | 0.75820233 |



|            |    |          |            |
|------------|----|----------|------------|
| cg10846615 | 2  | 2.21E-12 | 0.6377974  |
| cg26091021 | 2  | 3.83E-13 | 0.69144985 |
| cg03765885 | 2  | 1.93E-13 | 0.67416875 |
| cg26621770 | 12 | 3.20E-08 | 0.57623136 |
| cg13911052 | 2  | 4.85E-10 | 0.59074051 |
| cg05266564 | 2  | 1.75E-08 | 0.55697778 |
| cg10477905 | 2  | 1.54E-10 | 0.69243421 |
| cg11775124 | 2  | 1.77E-11 | 0.48468235 |
| cg03736795 | 4  | 1.33E-14 | 0.54995777 |
| cg09590068 | 12 | 5.93E-07 | 0.69802241 |
| cg12437821 | 12 | 2.24E-12 | 0.41244053 |
| cg00423598 | 7  | 1.29E-17 | 0.70240124 |
| cg21661379 | 2  | 2.86E-14 | 0.49393856 |
| cg10297792 | 12 | 7.58E-12 | 0.70664313 |
| cg16329589 | 4  | 2.12E-14 | 0.6375035  |
| cg14123543 | 12 | 3.37E-10 | 0.46379757 |
| cg13180315 | 2  | 4.00E-13 | 0.68349102 |
| cg24800883 | 5  | 6.57E-15 | 0.65159204 |
| cg15854547 | 12 | 1.19E-12 | 0.49362283 |
| cg11692124 | 17 | 5.36E-12 | 0.54986973 |
| cg11869862 | 15 | 1.71E-12 | 0.68576085 |
| cg12756504 | 15 | 1.33E-12 | 0.75211872 |
| cg10546817 | 14 | 1.67E-09 | 0.5546951  |
| cg19067025 | 15 | 2.53E-13 | 0.79618217 |
| cg16482878 | 15 | 2.45E-13 | 0.51113531 |
| cg02140384 | 1  | 4.65E-12 | 0.73070222 |
| cg06530563 | 12 | 3.00E-11 | 0.55734711 |
| cg26643142 | 12 | 8.66E-12 | 0.66292378 |
| cg11813265 | 14 | 1.77E-11 | 0.5665874  |
| cg02857760 | 2  | 4.84E-14 | 0.79467953 |
| cg10893278 | 12 | 1.51E-11 | 0.49861507 |
| cg18338775 | 2  | 1.34E-13 | 0.67294784 |
| cg23442672 | 12 | 6.58E-11 | 0.51198549 |
| cg14313315 | 12 | 1.40E-14 | 0.62841472 |
| cg07533951 | 12 | 8.94E-11 | 0.50505916 |
| cg00223681 | 2  | 7.35E-11 | 0.63489902 |
| cg23591463 | 12 | 2.40E-09 | 0.51880427 |
| cg09701682 | 12 | 4.52E-16 | 0.82249533 |
| cg01184975 | 12 | 2.13E-14 | 0.51104838 |
| cg10792302 | 12 | 5.88E-15 | 0.65189007 |
| cg07930539 | 2  | 9.47E-15 | 0.75655136 |
| cg14454907 | 2  | 1.20E-14 | 0.81909899 |
| cg11064034 | 12 | 5.15E-15 | 0.61674718 |
| cg18677101 | 12 | 2.30E-13 | 0.56196525 |
| cg09784934 | 2  | 1.67E-13 | 0.75693391 |
| cg25708328 | 2  | 4.18E-15 | 0.75939948 |

|            |    |          |            |
|------------|----|----------|------------|
| cg26821745 | 2  | 2.01E-14 | 0.7921366  |
| cg10852861 | 4  | 6.42E-17 | 0.63492034 |
| cg25935375 | 12 | 6.42E-17 | 0.69657489 |
| cg14187844 | 12 | 1.38E-10 | 0.58830497 |
| cg25988321 | 14 | 6.31E-13 | 0.6528047  |
| cg23676302 | 2  | 6.65E-19 | 0.70051124 |
| cg24592576 | 12 | 2.63E-16 | 0.69350734 |
| cg06821999 | 14 | 4.08E-11 | 0.661881   |
| cg20249252 | 12 | 3.48E-17 | 0.65111678 |
| cg22237668 | 12 | 3.20E-19 | 0.72992942 |
| cg03104083 | 12 | 4.76E-16 | 0.76276776 |
| cg07136646 | 12 | 8.55E-16 | 0.68144058 |

---

| <b>Mean <math>\beta</math>-<br/>value OA<br/>hip</b> | <b>Delta Beta</b> |
|------------------------------------------------------|-------------------|
| 0.4834658                                            | 0.158019461       |
| 0.42652501                                           | 0.124869877       |
| 0.47854985                                           | 0.11869012        |
| 0.4585353                                            | 0.10307411        |
| 0.69535081                                           | 0.102892768       |
| 0.19939811                                           | 0.126768649       |
| 0.71717233                                           | 0.117099192       |
| 0.64494435                                           | 0.11923581        |
| 0.26862948                                           | 0.166179704       |
| 0.34014291                                           | 0.139015685       |
| 0.2256487                                            | 0.111353762       |
| 0.27279069                                           | 0.25824151        |
| 0.56553322                                           | 0.101382242       |
| 0.34500609                                           | 0.107764809       |
| 0.19708549                                           | 0.123546999       |
| 0.26849451                                           | 0.113460843       |
| 0.41156189                                           | 0.103851207       |
| 0.70932008                                           | 0.102805193       |
| 0.68280999                                           | 0.109559257       |
| 0.72313228                                           | 0.108431462       |
| 0.54414736                                           | 0.117350411       |
| 0.47024921                                           | 0.159451047       |
| 0.28527274                                           | 0.126415847       |
| 0.7296968                                            | 0.115746818       |
| 0.31063568                                           | 0.108923648       |
| 0.3224554                                            | 0.112542723       |
| 0.42204898                                           | 0.123202348       |
| 0.6218087                                            | 0.130958781       |
| 0.63093394                                           | 0.159104907       |
| 0.46914212                                           | 0.166689396       |
| 0.58502214                                           | 0.19225894        |
| 0.41885078                                           | 0.210439484       |
| 0.66950407                                           | 0.100018829       |
| 0.61624032                                           | 0.12764353        |
| 0.50255812                                           | 0.163168746       |
| 0.59072756                                           | 0.111855786       |
| 0.38776761                                           | 0.12201238        |
| 0.399349                                             | 0.106922616       |
| 0.27799102                                           | 0.112226447       |

0.67085447 0.102053742  
0.29105735 0.107141121  
0.52938654 0.103094894  
0.18388046 0.131848379  
0.63441346 0.10212193  
0.3946569 0.120944042  
0.58961346 0.141218346  
0.36749337 0.145236573  
0.36534795 0.104389656  
0.57295899 0.125893464  
0.38673483 0.104380018  
0.54219032 0.118257976  
0.2595842 0.116675668  
0.44794056 0.105787551  
0.27146669 0.126246562  
0.33431617 0.179868679  
0.39903989 0.14232443  
0.52255547 0.163096238  
0.57942375 0.102517335  
0.64514385 0.105228379  
0.36215308 0.116198073  
0.30361907 0.158663367  
0.68233752 0.171821559  
0.33794912 0.147171413  
0.70428524 0.106837779  
0.52914809 0.127240739  
0.27044563 0.100707916  
0.49771664 0.116584171  
0.51263705 0.146137364  
0.29838828 0.147025788  
0.38512483 0.152612373  
0.31188753 0.108870316  
0.3854192 0.102184326  
0.4747801 0.106364145  
0.49818394 0.220190184  
0.52472506 0.131314689  
0.18673729 0.102429653  
0.76187268 0.105173955  
0.3365835 0.133260725  
0.4636864 0.142498228  
0.35216674 0.206210887  
0.43603527 0.123308178  
0.22326039 0.117218325  
0.34280109 0.152625359  
0.59992631 0.136586485  
0.41684521 0.146236331

0.20317173 0.106903303  
0.52736879 0.120406574  
0.61528214 0.187028487  
0.46437745 0.151706945  
0.61964552 0.150878753  
0.42068562 0.161568284  
0.38266149 0.193721336  
0.54783283 0.110686643  
0.41561896 0.100432434  
0.28932858 0.114237962  
0.58373996 0.1128897  
0.31761873 0.164514403  
0.42476701 0.172521073  
0.58539684 0.104026105  
0.77418559 0.119790398  
0.34998013 0.138400539  
0.32393683 0.103315471  
0.53793913 0.110645037  
0.73461592 0.103159332  
0.68069552 0.106431696  
0.64522799 0.132112682  
0.57326575 0.275705999  
0.54587942 0.104985993  
0.51606361 0.10158906  
0.4769889 0.114315464  
0.47825101 0.138706941  
0.49602211 0.109416882  
0.49825924 0.115601879  
0.45315225 0.139161264  
0.49102941 0.109079307  
0.25690909 0.104653408  
0.52179116 0.10167429  
0.40722116 0.18184203  
0.42490831 0.108999857  
0.19817694 0.162141125  
0.19033818 0.119856283  
0.51314924 0.103482529  
0.33336069 0.122184848  
0.43189012 0.159576425  
0.34003632 0.112221351  
0.5045011 0.103362966  
0.52551492 0.13268465  
0.42051342 0.216919872  
0.24716936 0.106931031  
0.61361676 0.126184621  
0.37947905 0.165734972

0.60698088 0.106355079  
0.55992923 0.101222679  
0.65031296 0.105110736  
0.37652977 0.118836589  
0.57161872 0.114927363  
0.54046212 0.109059777  
0.22321296 0.146917116  
0.55107773 0.150270976  
0.46680296 0.173995529  
0.4050864 0.137239101  
0.26768826 0.123529162  
0.62106922 0.102564919  
0.53466409 0.10516428  
0.65538027 0.10396077  
0.6625419 0.111727771  
0.24880621 0.126522925  
0.69005951 0.130566945  
0.45190167 0.105866578  
0.64665657 0.123824438  
0.29693478 0.105311393  
0.19542935 0.106044794  
0.36723787 0.117919995  
0.43354639 0.104672866  
0.62936029 0.107109713  
0.65373863 0.11693433  
0.43610205 0.17905891  
0.60521349 0.13277356  
0.47238587 0.195367662  
0.49768003 0.157404343  
0.36794953 0.175642055  
0.21050379 0.119165976  
0.45999456 0.111427867  
0.3881529 0.116614356  
0.59225966 0.103357276  
0.36100698 0.14693277  
0.51138944 0.156956201  
0.38793892 0.162203943  
0.62166571 0.100023785  
0.46215892 0.111703298  
0.46104562 0.120782647  
0.27829294 0.123257036  
0.39422321 0.111510607  
0.63496992 0.104395115  
0.65360805 0.13977046  
0.5305968 0.106231786  
0.35868908 0.100200071

0.42593425 0.203431411  
0.43269595 0.112510721  
0.58523288 0.100029302  
0.30280021 0.150022371  
0.71497246 0.114038338  
0.41738983 0.220431215  
0.63767456 0.118453177  
0.67450527 0.103033831  
0.3608979 0.142737852  
0.45632518 0.131377045  
0.34618512 0.101475159  
0.39106137 0.139587446  
0.62932511 0.11046254  
0.43517271 0.121816231  
0.23541987 0.116057398  
0.7135329 0.103011636  
0.74237183 0.103771861  
0.53024797 0.130918919  
0.5334226 0.11410591  
0.5177799 0.137608998  
0.52400051 0.124908369  
0.43748491 0.114120958  
0.45699901 0.102291917  
0.60596667 0.113324109  
0.50823096 0.110850425  
0.33035633 0.113001764  
0.47325291 0.114174795  
0.41335384 0.157184918  
0.34162619 0.104340267  
0.62010658 0.103717366  
0.62894929 0.146473389  
0.65488325 0.125619652  
0.6431604 0.118982474  
0.48153633 0.104254078  
0.45036972 0.14593994  
0.65090295 0.176603123  
0.52774613 0.184629439  
0.43843676 0.211533124  
0.48783252 0.264890115  
0.55672964 0.10916324  
0.52834447 0.113414431  
0.54015631 0.120847373  
0.61456236 0.124896191  
0.6336629 0.135396001  
0.39773642 0.131258868  
0.63572034 0.146432819

0.52119348 0.127351492  
0.50664339 0.122321179  
0.50017768 0.11645329  
0.42427706 0.11868358  
0.32356003 0.207239477  
0.31353564 0.127202047  
0.41338144 0.109154552  
0.38423239 0.144367419  
0.63396095 0.106934555  
0.56085377 0.104301146  
0.17432646 0.108366618  
0.7539845 0.107336349  
0.61999056 0.114932185  
0.53941111 0.134933619  
0.68046033 0.145282898  
0.2862338 0.153839675  
0.39900773 0.105243167  
0.53413721 0.114216654  
0.56001918 0.102993842  
0.39762068 0.125531095  
0.44748459 0.146125615  
0.646001 0.101785908  
0.71859979 0.111563258  
0.46934901 0.146859061  
0.54939735 0.11188178  
0.42286773 0.113425273  
0.74114493 0.101901839  
0.57896304 0.162968993  
0.19040069 0.100385835  
0.70977321 0.109792651  
0.32236643 0.161972642  
0.56811481 0.105194773  
0.45037186 0.105195686  
0.45665908 0.118887701  
0.65044115 0.148626671  
0.51337501 0.114142923  
0.56783682 0.113893459  
0.36291833 0.108843654  
0.33960336 0.117367428  
0.54686924 0.105092392  
0.43098781 0.100064816  
0.57433493 0.130000328  
0.45393521 0.168223191  
0.36569152 0.205819726  
0.20901902 0.1030683  
0.64850983 0.109838051



0.55297718 0.102048434  
0.72903937 0.140104946  
0.51967962 0.21889603  
0.45321949 0.147010408  
0.18624312 0.10287833  
0.5362956 0.190184761  
0.3217836 0.24188354  
0.38927519 0.24850502  
0.43238271 0.117158506  
0.53250377 0.118270333  
0.51419527 0.123683481  
0.60505943 0.115832626  
0.63357079 0.100366945  
0.17519928 0.104874839  
0.56789836 0.14710789  
0.65950027 0.109731251  
0.3973927 0.105978172  
0.62732448 0.157987705  
0.4561657 0.113631242  
0.35715367 0.121916486  
0.42897712 0.108259023  
0.33233474 0.18751748  
0.26277616 0.107009276  
0.66252879 0.121835259  
0.14760061 0.139605679  
0.27446356 0.166971663  
0.59665485 0.11413745  
0.24215308 0.102966526  
0.49175719 0.10393789  
0.20913876 0.125111758  
0.57527918 0.108321526  
0.48493355 0.156668539  
0.46199635 0.101238448  
0.65601735 0.109503337  
0.42630035 0.10294111  
0.51096361 0.124380597  
0.20968118 0.208043769  
0.3264539 0.31594941  
0.54324063 0.109833142  
0.43759889 0.162873043  
0.46499662 0.104578438  
0.36449513 0.126109624  
0.65838008 0.119179438  
0.60851455 0.125565267  
0.55035943 0.170946016  
0.19657037 0.138069706

0.21839123 0.205616658  
0.30277846 0.210852469  
0.36682935 0.108275934  
0.48072608 0.106885307  
0.6561397 0.122285929  
0.2697318 0.122415135  
0.5365305 0.205957699  
0.60247285 0.15834153  
0.49419603 0.145495566  
0.4811335 0.122789681  
0.44491504 0.129068639  
0.31927476 0.103267824  
0.32768238 0.162966802  
0.62944777 0.172263241  
0.49031809 0.116448359  
0.60978395 0.111023722  
0.72578222 0.112311893  
0.77418097 0.109507572  
0.64745711 0.115917906  
0.72880467 0.151117943  
0.68057789 0.204402766  
0.45046471 0.322345434  
0.30061638 0.170818651  
0.3330956 0.125258856  
0.44494357 0.106354053  
0.40520505 0.108946375  
0.49178825 0.138784519  
0.38665394 0.226785467  
0.36634437 0.160383789  
0.2908759 0.129898076  
0.19522287 0.129923439  
0.4717245 0.16308772  
0.29221056 0.117152804  
0.31274975 0.112129752  
0.34793582 0.112522271  
0.56637685 0.205771909  
0.3753693 0.102960893  
0.67072622 0.110279108  
0.57987175 0.100842013  
0.2949718 0.137213238  
0.3172952 0.170510587  
0.63623665 0.109221993  
0.20067723 0.115258376  
0.31237345 0.16940641  
0.42979287 0.153848546  
0.34908921 0.148327555

|            |             |
|------------|-------------|
| 0.50312154 | 0.110103097 |
| 0.49440442 | 0.148662548 |
| 0.61606631 | 0.135125538 |
| 0.48600639 | 0.138133566 |
| 0.48668625 | 0.266225753 |
| 0.64111789 | 0.102291004 |
| 0.49779637 | 0.149420205 |
| 0.64055492 | 0.111145439 |
| 0.63063416 | 0.14184087  |
| 0.54620025 | 0.101099283 |
| 0.44065834 | 0.159894034 |
| 0.29888346 | 0.116754176 |
| 0.5872308  | 0.122554091 |
| 0.78883066 | 0.107344499 |
| 0.59907558 | 0.11097135  |
| 0.75183499 | 0.122229795 |
| 0.58151455 | 0.123910416 |
| 0.60221273 | 0.128903329 |
| 0.33405585 | 0.138863249 |
| 0.31204145 | 0.170021951 |
| 0.45114378 | 0.231882866 |
| 0.27465181 | 0.114395499 |
| 0.60447208 | 0.102437893 |
| 0.51849675 | 0.11903604  |
| 0.48761858 | 0.20492336  |
| 0.46769225 | 0.228016835 |
| 0.59898337 | 0.104990258 |
| 0.30244249 | 0.105451991 |
| 0.63009238 | 0.106314455 |
| 0.72868154 | 0.112756439 |
| 0.57949063 | 0.114027392 |
| 0.26904623 | 0.123929148 |
| 0.47436898 | 0.153381442 |
| 0.35109346 | 0.155604909 |
| 0.34640612 | 0.160225873 |
| 0.6699947  | 0.161819084 |
| 0.53759144 | 0.165483323 |
| 0.27946243 | 0.167691915 |
| 0.54607905 | 0.170809452 |
| 0.47209307 | 0.1850925   |
| 0.65112313 | 0.187707464 |
| 0.44291917 | 0.193843335 |
| 0.49192257 | 0.206898627 |
| 0.33365706 | 0.208149486 |
| 0.78903148 | 0.104143805 |
| 0.23456538 | 0.105924332 |

0.26616332 0.106281768  
0.68136322 0.106949859  
0.17722951 0.107114851  
0.22831246 0.10889619  
0.62503433 0.110622651  
0.55359871 0.113561966  
0.22820149 0.115922604  
0.57684207 0.120000263  
0.30463888 0.120386212  
0.59083962 0.1212319  
0.62036868 0.127581763  
0.34979416 0.128132438  
0.234249 0.131372956  
0.3632924 0.132100255  
0.31225551 0.133199457  
0.63412617 0.145355964  
0.43028591 0.1519757  
0.23136362 0.154885007  
0.55765076 0.158384714  
0.6065314 0.159053079  
0.49796149 0.16077729  
0.39363124 0.170108841  
0.30231247 0.174713327  
0.45902581 0.179071322  
0.3634963 0.185190152  
0.38300792 0.185466419  
0.49096486 0.190827133  
0.3698914 0.191656216  
0.38999421 0.192357182  
0.39678942 0.203073015  
0.46687603 0.206101969  
0.54067178 0.226793597  
0.41554346 0.260631482  
0.59921227 0.113673272  
0.63187737 0.118658348  
0.52538611 0.139358952  
0.54033222 0.151327089  
0.5667498 0.111701441  
0.7277507 0.104221606  
0.60837367 0.121395529  
0.24444348 0.313521513  
0.28605284 0.130182225  
0.32681167 0.142287402  
0.36188117 0.100052567  
0.42980093 0.114159147  
0.40174833 0.100357193

0.34583023 0.118346178  
0.42574963 0.11896277  
0.54186905 0.101567164  
0.62003189 0.103012231  
0.52223732 0.193471801  
0.73973165 0.106657131  
0.37052627 0.201065591  
0.69327932 0.115780005  
0.20340771 0.106428592  
0.21909878 0.115172991  
0.60895109 0.136971152  
0.445969 0.153988467  
0.63863817 0.106371856  
0.41495703 0.125572206  
0.31091429 0.133394915  
0.43196487 0.160869085  
0.29029937 0.182046174  
0.71315339 0.103583818  
0.65059954 0.121282789  
0.46787021 0.161559651  
0.43706912 0.10280184  
0.18363416 0.146949179  
0.29298012 0.159870201  
0.73825838 0.109165859  
0.45027065 0.113264186  
0.71907368 0.103986495  
0.6233543 0.12661738  
0.53754557 0.116008242  
0.47490806 0.120108171  
0.18091029 0.12837004  
0.24602433 0.172598216  
0.49426946 0.107454462  
0.51656717 0.200879918  
0.60873272 0.112800791  
0.38758649 0.119138602  
0.30311404 0.137544125  
0.22168741 0.133380563  
0.1798781 0.102610681  
0.16740366 0.104830894  
0.43913358 0.106559864  
0.2408072 0.128681586  
0.18307477 0.131765523  
0.11577668 0.13580691  
0.23323496 0.162697461  
0.24936705 0.178957246  
0.19261791 0.189659275

0.1857587 0.209209121  
0.28437211 0.216544211  
0.24738134 0.104522828  
0.50932151 0.152263228  
0.3590561 0.101077922  
0.39596941 0.103068281  
0.1522382 0.10014049  
0.49343114 0.145009934  
0.69165532 0.108742694  
0.57642104 0.155720362  
0.45232864 0.182403432  
0.58825977 0.135022112  
0.29603367 0.100217441  
0.49927562 0.118997946  
0.49316618 0.100903659  
0.46442333 0.111415602  
0.56507808 0.13233612  
0.46543995 0.106781338  
0.45737065 0.135424257  
0.20663525 0.148586967  
0.27768381 0.108784696  
0.43734826 0.102487474  
0.54013385 0.113050333  
0.39098096 0.140884942  
0.4753962 0.157387497  
0.58091449 0.108844763  
0.30633506 0.109033681  
0.31860598 0.125550458  
0.51160659 0.108260858  
0.34119597 0.115029713  
0.74995888 0.102417872  
0.64425563 0.1123571  
0.65083408 0.114131985  
0.62965655 0.140046178  
0.53477137 0.138872757  
0.17476654 0.11513151  
0.74205174 0.104043153  
0.7962071 0.106095649  
0.28538294 0.15923031  
0.64051109 0.112202269  
0.23252074 0.114013081  
0.37779808 0.178062512  
0.56614335 0.135817166  
0.50742031 0.141902092  
0.59664198 0.102958199  
0.50091965 0.165435501

0.61535982 0.106622419  
0.56113302 0.179781844  
0.76346923 0.102545354  
0.49665456 0.155003586  
0.3863473 0.142117561  
0.33538064 0.105248882  
0.57880931 0.104453929  
0.68860465 0.151128974  
0.70065598 0.176704964  
0.48439361 0.100043505  
0.21708767 0.13461356  
0.53444571 0.116076836  
0.57132054 0.114641931  
0.43139405 0.123016388  
0.55840147 0.106477746  
0.55804166 0.108763754  
0.45643986 0.101459856  
0.42208141 0.105177285  
0.60788411 0.106519778  
0.55099104 0.107571248  
0.53801504 0.113333948  
0.68907981 0.106630726  
0.24258385 0.149338398  
0.72645838 0.104214551  
0.49041259 0.133513552  
0.58326952 0.164537492  
0.63163089 0.143946523  
0.52501741 0.110935735  
0.27535075 0.118797475  
0.41108292 0.149023368  
0.52092036 0.123417956  
0.45102899 0.121316611  
0.42524552 0.101980917  
0.62851402 0.106303533  
0.4763725 0.125023952  
0.64252495 0.188835227  
0.59129039 0.10007114  
0.23252946 0.101467212  
0.54814224 0.107264018  
0.50193602 0.111542313  
0.44668915 0.101400652  
0.78364152 0.10016227  
0.54984169 0.103262656  
0.72788355 0.136033221  
0.70179695 0.156579932  
0.54925012 0.219040795

0.49870064 0.276368087  
0.6407561 0.103346248  
0.68230696 0.125592058  
0.54357573 0.131685999  
0.65863377 0.100972106  
0.62588039 0.100485181  
0.27942223 0.117052824  
0.28604351 0.127789341  
0.31817436 0.162189498  
0.68418349 0.112825922  
0.64365235 0.104689993  
0.42106964 0.189348825  
0.43960109 0.123555998  
0.65153801 0.113566976  
0.59919099 0.120639331  
0.39069932 0.195858129  
0.40561251 0.157952633  
0.31107624 0.102291129  
0.35031934 0.114193472  
0.50385829 0.163452292  
0.26615292 0.140564517  
0.38291972 0.125177064  
0.62975865 0.105381555  
0.47591973 0.106974665  
0.52592687 0.136824311  
0.34921185 0.143669113  
0.23669417 0.107751746  
0.70180073 0.115643521  
0.64928066 0.139528479  
0.32502929 0.142621279  
0.3347004 0.145146656  
0.64343409 0.179386227  
0.73448577 0.109476664  
0.18494405 0.127374124  
0.39172179 0.232393889  
0.72805051 0.122893312  
0.65822481 0.123152141  
0.43615697 0.197756361  
0.49708338 0.120292245  
0.31818671 0.117647506  
0.39502748 0.115005207  
0.6130005 0.126546985  
0.54766874 0.159567132  
0.5006303 0.107692983  
0.41335062 0.103971817  
0.39841881 0.110588674



0.71443331 0.121033487  
0.35592387 0.124317594  
0.30758386 0.133178326  
0.34028018 0.139573706  
0.62349489 0.143100717  
0.41087226 0.148667128  
0.31268662 0.101856862  
0.47872416 0.114291553  
0.23348001 0.105803648  
0.52088226 0.109511858  
0.30769596 0.110398356  
0.41190637 0.106266541  
0.31926534 0.115622559  
0.49349476 0.262860926  
0.32532964 0.13276183  
0.32494758 0.150473747  
0.39347882 0.104723196  
0.31661082 0.105199863  
0.3502153 0.14915983  
0.3948292 0.106034725  
0.34980918 0.118784544  
0.27997004 0.142810433  
0.6170438 0.184139679  
0.53344132 0.122921272  
0.39897917 0.15529964  
0.4010742 0.150743511  
0.33990362 0.101375601  
0.32770361 0.12675959  
0.30038811 0.150637123  
0.63103073 0.10028962  
0.64241068 0.104139415  
0.74006751 0.100369939  
0.12837246 0.121372177  
0.20033622 0.123029943  
0.12508623 0.128032211  
0.13350352 0.150639097  
0.36252176 0.235257835  
0.46689768 0.284557508  
0.41480838 0.458340555  
0.34897475 0.48595113  
0.31667688 0.114258465  
0.65149325 0.100551577  
0.5460109 0.109158375  
0.28055558 0.185004731  
0.77718338 0.112857629  
0.14354057 0.128209604

0.1549485 0.16796352  
0.31098624 0.268071673  
0.24949557 0.295452742  
0.36904147 0.370745075  
0.34498311 0.399999605  
0.32104259 0.435107872  
0.56585753 0.149146937  
0.40316677 0.18380006  
0.49008735 0.106872938  
0.59725318 0.167919603  
0.32495589 0.172459301  
0.64032466 0.199126933  
0.40060731 0.114337636  
0.26266614 0.158890813  
0.50036632 0.126552575  
0.57917733 0.104230432  
0.46332244 0.109809338  
0.49155433 0.135150263  
0.6401386 0.104780585  
0.23307667 0.149745151  
0.38359006 0.123877273  
0.19828792 0.224460239  
0.24337101 0.103495084  
0.3975283 0.128335933  
0.57111566 0.13987125  
0.43659645 0.163934393  
0.49653485 0.164326091  
0.28281599 0.118037437  
0.34703345 0.155544538  
0.56016473 0.139410888  
0.53585933 0.101103932  
0.50882681 0.130813666  
0.6409104 0.102935645  
0.63164907 0.10308436  
0.2529037 0.132932923  
0.24491116 0.150383055  
0.19594283 0.122058011  
0.12531151 0.131088775  
0.23553715 0.152109416  
0.3038516 0.23900106  
0.347801 0.111210932  
0.34567772 0.128734751  
0.43387784 0.154449343  
0.56838748 0.119844993  
0.60928609 0.159015478  
0.28398479 0.171162002

0.30963589 0.214891859  
0.4617764 0.176900087  
0.66403691 0.131335705  
0.13177714 0.137809375  
0.32559095 0.207124031  
0.27878115 0.221180306  
0.30841501 0.111871399  
0.72250949 0.121182339  
0.77824207 0.132959044  
0.20128491 0.152234631  
0.23113924 0.157021356  
0.45097258 0.163821669  
0.1774142 0.169938577  
0.48662658 0.192376095  
0.68768403 0.104944194  
0.66898584 0.116800673  
0.26798375 0.121465648  
0.25790551 0.174264453  
0.59346982 0.203202869  
0.30663774 0.222033032  
0.36767799 0.223534599  
0.47762547 0.275566083  
0.25778515 0.20393152  
0.50997664 0.222391728  
0.50527678 0.249409751  
0.73415761 0.129602048  
0.24056018 0.15384611  
0.60585361 0.162013066  
0.15545373 0.181887693  
0.51481829 0.25891751  
0.23282647 0.156928403  
0.25150273 0.233356508  
0.57120736 0.273641878  
0.31616371 0.285222404  
0.30161795 0.232977535  
0.26114155 0.140393704  
0.43810149 0.154692302  
0.48520569 0.179237023  
0.28371224 0.119589653  
0.19762153 0.12091461  
0.35618953 0.230207037  
0.24007651 0.233819555  
0.14584103 0.119058087  
0.18457208 0.100932197  
0.26779361 0.113750075  
0.72004182 0.116555067

0.16381103 0.127869132  
0.18093632 0.13626565  
0.2896079 0.144048508  
0.2245952 0.145444118  
0.26719176 0.179699132  
0.35730433 0.198630442  
0.26069563 0.255210437  
0.51402853 0.266132539  
0.49225251 0.28054619  
0.45890218 0.299711254  
0.46474696 0.349931403  
0.45853395 0.352247267  
0.32634973 0.357890251  
0.38743145 0.383281634  
0.59260111 0.279656248  
0.26775016 0.135092196  
0.62258713 0.150042148  
0.55781302 0.16994882  
0.55453431 0.196322905  
0.40913828 0.2409098  
0.522163 0.298757515  
0.47551226 0.312116096  
0.67447556 0.183433464  
0.77588314 0.139478829  
0.74651938 0.14200828  
0.67950967 0.17768419  
0.69331815 0.179744631  
0.53601516 0.242226802  
0.4093018 0.2702028  
0.25311747 0.127019422  
0.39752435 0.122683424  
0.35733475 0.103083251  
0.33801446 0.147341183  
0.74478266 0.11605395  
0.67053507 0.12395168  
0.19421491 0.171147466  
0.3656483 0.10964225  
0.68133749 0.13194421  
0.55148913 0.13621397  
0.61725598 0.118963537  
0.40213628 0.100545542  
0.70473535 0.107404366  
0.48918193 0.136466824  
0.11266659 0.101143785  
0.54980468 0.130396714  
0.57457781 0.102299153

0.33766042 0.134466579  
0.23424662 0.14386385  
0.33838542 0.145611353  
0.64706048 0.102358612  
0.58676362 0.143284949  
0.46751587 0.158401427  
0.56260062 0.201023226  
0.59546719 0.238369318  
0.57871776 0.102424553  
0.48894531 0.110589463  
0.53142904 0.111646211  
0.72897092 0.12414443  
0.73049589 0.131178601  
0.59973448 0.132880799  
0.56588023 0.124552801  
0.57988843 0.106483812  
0.43207495 0.136438995  
0.57991429 0.132420265  
0.56009295 0.126903482  
0.50155293 0.10485816  
0.59785051 0.117452679  
0.37187238 0.129653676  
0.5885068 0.161245556  
0.36231028 0.108784555  
0.64990551 0.100463122  
0.4085802 0.161379658  
0.5407851 0.200241013  
0.60431645 0.103158923  
0.29400644 0.122584836  
0.43758235 0.138802425  
0.44897638 0.147446245  
0.41624971 0.179729962  
0.35582406 0.180992269  
0.4404017 0.108699005  
0.50474622 0.116880263  
0.5577439 0.122731724  
0.37759824 0.128131018  
0.66562111 0.103164731  
0.4514724 0.115002561  
0.54612498 0.107048787  
0.41408409 0.111585515  
0.51868189 0.10501574  
0.40419095 0.117604141  
0.35107603 0.120765472  
0.53120295 0.128777793  
0.50469196 0.121892737

0.47738851 0.128953187  
0.5207381 0.114444586  
0.29418727 0.11155755  
0.56592492 0.166170759  
0.31278661 0.17883846  
0.43540501 0.147391158  
0.18886456 0.13186252  
0.56251566 0.172049026  
0.61814977 0.10073923  
0.47614518 0.105608966  
0.49684762 0.122086923  
0.47596306 0.109644203  
0.59392879 0.161855475  
0.70501689 0.142709481  
0.59793957 0.115804969  
0.61891179 0.119674613  
0.48869782 0.110124408  
0.47917881 0.108813982  
0.70470076 0.123920759  
0.35627667 0.107399621  
0.61366064 0.122681273  
0.38925044 0.263363835  
0.27623061 0.10520912  
0.6812227 0.100692998  
0.55635022 0.114250026  
0.73257058 0.117178743  
0.74899977 0.123720392  
0.42543601 0.117776542  
0.58101304 0.218408043  
0.28334307 0.12329829  
0.63445226 0.11358109  
0.46566342 0.114082977  
0.64794016 0.148587753  
0.59935345 0.103561874  
0.66697499 0.106889848  
0.61578015 0.11322227  
0.50871946 0.18555304  
0.2841882 0.128494215  
0.2604824 0.132746525  
0.73672777 0.111423983  
0.48103142 0.123026848  
0.69515604 0.169829819  
0.44302201 0.135928316  
0.57904038 0.10946938  
0.60916556 0.145349616  
0.56713651 0.120312872

0.32402359 0.100342584  
0.61272609 0.14557239  
0.49759598 0.131937596  
0.52974697 0.187604611  
0.57627515 0.101728483  
0.54937473 0.114790499  
0.61239094 0.136507681  
0.46561607 0.123712255  
0.46036712 0.128205268  
0.37092748 0.103488863  
0.69265019 0.163107225  
0.27806892 0.161755277  
0.25195289 0.121583552  
0.40674868 0.161204565  
0.68841477 0.140388988  
0.36883889 0.119710204  
0.31244989 0.123126979  
0.29627168 0.214133629  
0.33866029 0.109945197  
0.29318461 0.144293255  
0.3395328 0.113420726  
0.24854113 0.101149436  
0.46806633 0.163838267  
0.4243874 0.123690682  
0.46378216 0.105386669  
0.55201179 0.112297469  
0.24762648 0.103862256  
0.26941138 0.112599127  
0.58961717 0.101170628  
0.35627814 0.166842196  
0.49547652 0.192085112  
0.57907732 0.121481553  
0.61011452 0.152751116  
0.37073741 0.117636229  
0.37207027 0.109604196  
0.42306355 0.10511575  
0.53501916 0.147554699  
0.41825864 0.191073598  
0.23213281 0.1239938  
0.59884928 0.102380634  
0.5709482 0.115033304  
0.5054144 0.135279778  
0.3491929 0.22392027  
0.59341284 0.101945188  
0.4011236 0.102616133  
0.50726961 0.1330072

0.62141838 0.170062447  
0.50773338 0.17827661  
0.53643082 0.138185586  
0.37358639 0.163110637  
0.43661868 0.184216217  
0.7650095 0.109241055  
0.26931023 0.12349983  
0.30011481 0.127129531  
0.51511113 0.102114537  
0.29403371 0.107255484  
0.53440677 0.169889375  
0.74426416 0.105740504  
0.74764568 0.148357837  
0.25562904 0.15191361  
0.59369182 0.165525478  
0.53890332 0.230827324  
0.68238403 0.112554374  
0.55098927 0.146547068  
0.40216603 0.171162486  
0.35017319 0.144872516  
0.31364692 0.154723089  
0.3422889 0.110325543  
0.42465364 0.105664318  
0.35252544 0.110278343  
0.40723174 0.11785238  
0.67096806 0.110457608  
0.51136976 0.131470683  
0.31647742 0.104151446  
0.41682969 0.215334905  
0.52671837 0.11578974  
0.3275586 0.101395366  
0.64422683 0.105947791  
0.24259493 0.117310299  
0.22078134 0.144332533  
0.32702142 0.137064617  
0.39723951 0.109894945  
0.70953338 0.138969555  
0.72704817 0.140711903  
0.38479585 0.147449573  
0.69456654 0.154988919  
0.6726495 0.210945431  
0.575642 0.111345354  
0.47578167 0.139168852  
0.57329559 0.12820294  
0.24214956 0.155641892  
0.40140556 0.168639716



0.189984 0.174643371  
0.24082405 0.186069262  
0.23791641 0.225560111  
0.60035119 0.191578021  
0.58023239 0.11874436  
0.32196188 0.121746672  
0.66022389 0.134006658  
0.08982625 0.10097572  
0.12230488 0.117410083  
0.0985112 0.146149272  
0.13744496 0.149441916  
0.12821761 0.180084805  
0.2187421 0.225761695  
0.14225062 0.240782654  
0.16227865 0.259702732  
0.18027142 0.265514213  
0.20110118 0.2814127  
0.2293158 0.283134142  
0.44558545 0.296385302  
0.20149983 0.30893807  
0.17118753 0.309268674  
0.22404369 0.314295283  
0.17832799 0.332815219  
0.23323686 0.340385587  
0.19478847 0.346454621  
0.19000146 0.390038987  
0.35419607 0.391193189  
0.25673156 0.391773297  
0.24286574 0.40416054  
0.25689498 0.41540935  
0.30617261 0.424013737  
0.28395426 0.441099394  
0.39113389 0.466200942  
0.26698864 0.488321609  
0.16299222 0.125199572  
0.23000293 0.125767425  
0.53143467 0.150186572  
0.13898032 0.170420256  
0.63945261 0.201702542  
0.46405324 0.225871865  
0.19911449 0.248388784  
0.29936627 0.267986274  
0.18728017 0.273105394  
0.41840041 0.281466323  
0.18388996 0.298822713  
0.41234621 0.339484252

0.30412221 0.34975457  
0.23907543 0.356327883  
0.26872 0.382188048  
0.46832829 0.384437603  
0.23303318 0.391539366  
0.51446433 0.10806893  
0.7117932 0.113543212  
0.40106784 0.134927828  
0.56131991 0.143517243  
0.17663416 0.108017108  
0.43579966 0.112558449  
0.30008496 0.130648824  
0.231398 0.114273669  
0.33100504 0.149859892  
0.46235257 0.157040326  
0.4272362 0.169075773  
0.36742754 0.181600733  
0.46497486 0.16060438  
0.57775425 0.125380308  
0.50939537 0.138557237  
0.64749766 0.104377913  
0.60794993 0.117824967  
0.57170883 0.148726374  
0.32013406 0.221993104  
0.36684623 0.117392908  
0.68991937 0.114434782  
0.48422257 0.115328683  
0.47639562 0.131150977  
0.15243536 0.119121441  
0.34135216 0.15885772  
0.33101555 0.168490511  
0.37040803 0.142707797  
0.48367749 0.158464821  
0.28358289 0.140398808  
0.29739268 0.100028846  
0.20538536 0.115884362  
0.65309674 0.134758143  
0.28365439 0.181493801  
0.41282132 0.103926769  
0.34231321 0.125795128  
0.42290156 0.100160739  
0.320895 0.101308908  
0.35404924 0.112732502  
0.4248835 0.113030693  
0.50345373 0.107366643  
0.49995862 0.123336231

0.33210231 0.12516995  
0.28546781 0.100524204  
0.50849818 0.118970009  
0.78138849 0.100711209  
0.35338197 0.137104407  
0.41697708 0.151061309  
0.34950688 0.115352024  
0.27800203 0.123222013  
0.68914888 0.144299408  
0.58222421 0.247959138  
0.43098215 0.248823388  
0.42035984 0.114108218  
0.71951214 0.129233403  
0.49583981 0.165628052  
0.40632716 0.12280631  
0.46990627 0.101633844  
0.26470529 0.104212396  
0.27530283 0.138085469  
0.69296568 0.163747067  
0.52776522 0.134176567  
0.41616551 0.153266619  
0.45244713 0.177588833  
0.46289196 0.155784804  
0.32664494 0.153722029  
0.71299301 0.141399337  
0.51721795 0.116331312  
0.50346348 0.121915723  
0.6530999 0.121510721  
0.41149108 0.131195345  
0.38947686 0.148754288  
0.71099022 0.139153557  
0.50858858 0.141358138  
0.56379948 0.125618111  
0.3969967 0.134370769  
0.62836481 0.105293394  
0.59874989 0.108236339  
0.44119173 0.126209548  
0.37942927 0.106129595  
0.49549986 0.11147257  
0.73597179 0.101563526  
0.31408422 0.107758864  
0.45335563 0.126214806  
0.4244061 0.11935596  
0.3421191 0.121890971  
0.21004088 0.106475702  
0.46360735 0.198955627

0.53059768 0.101866886  
0.49413426 0.14069409  
0.32591936 0.135841737  
0.42894126 0.208949244  
0.3781252 0.100938688  
0.27171081 0.101608048  
0.36851204 0.140848235  
0.40476084 0.231873069  
0.12569829 0.104038595  
0.71213597 0.106003803  
0.41840249 0.128167598  
0.21709444 0.162259892  
0.21910485 0.162836746  
0.41693503 0.209403458  
0.24163246 0.282888148  
0.53487253 0.131211718  
0.42959864 0.105544956  
0.2961952 0.115435238  
0.32093559 0.11491318  
0.51877817 0.109366808  
0.33203435 0.127969925  
0.53929878 0.102740228  
0.50848362 0.155079315  
0.63378828 0.170168222  
0.53868266 0.170742262  
0.41816225 0.14701581  
0.60024272 0.153764512  
0.42423277 0.106850972  
0.39881367 0.113278831  
0.23290902 0.105059157  
0.67807436 0.130591583  
0.63178799 0.167610388  
0.34713466 0.190454854  
0.3806371 0.219637467  
0.38502276 0.114844505  
0.75321217 0.100130582  
0.51371735 0.109028753  
0.5100595 0.126167917  
0.51503196 0.144850958  
0.58662479 0.134171164  
0.3544542 0.109326446  
0.39860339 0.188012728  
0.33014091 0.113113592  
0.25300329 0.101003125  
0.70304839 0.113654689  
0.69058384 0.12140423

0.55229445 0.159168155  
0.31919235 0.162374045  
0.45262338 0.164339797  
0.49109181 0.119951573  
0.59529687 0.12262207  
0.34612065 0.125595306  
0.63476269 0.125775299  
0.210129 0.111323223  
0.55678757 0.13989923  
0.61268463 0.147196383  
0.42909026 0.102756054  
0.24264833 0.137260046  
0.32913774 0.254722887  
0.27276566 0.102556598  
0.23725091 0.115601627  
0.39811539 0.131981307  
0.43406642 0.137717166  
0.30142516 0.149181503  
0.39725011 0.141446855  
0.32758003 0.10833658  
0.5860543 0.127784751  
0.56115748 0.151583415  
0.59989077 0.142318306  
0.63668481 0.100663428  
0.46085152 0.17086874  
0.48440284 0.10163979  
0.2491906 0.108707703  
0.47093729 0.11246872  
0.41627438 0.140018493  
0.58459796 0.142646841  
0.78565584 0.108684726  
0.70035164 0.123991766  
0.48098755 0.129405226  
0.33601515 0.194008151  
0.2901699 0.23288707  
0.41525983 0.113176732  
0.40318567 0.112098498  
0.48758769 0.1193678  
0.44519669 0.164068268  
0.6093727 0.102183414  
0.74867136 0.130388908  
0.46651713 0.127572847  
0.47182061 0.133638749  
0.73945845 0.108275475  
0.54776238 0.116888015  
0.41548328 0.103889069

|            |             |
|------------|-------------|
| 0.3148071  | 0.13466402  |
| 0.46817627 | 0.116527655 |
| 0.29861138 | 0.127613664 |
| 0.35953581 | 0.136187057 |
| 0.50697883 | 0.101425059 |
| 0.28544318 | 0.106166416 |
| 0.21704752 | 0.139056473 |
| 0.58191419 | 0.174410796 |
| 0.48340125 | 0.106713461 |
| 0.24316668 | 0.125699228 |
| 0.45378333 | 0.109816974 |
| 0.43730873 | 0.104862464 |
| 0.42491637 | 0.143559028 |
| 0.6144603  | 0.101569593 |
| 0.33347873 | 0.130651048 |
| 0.40003534 | 0.107457463 |
| 0.42361929 | 0.115079531 |
| 0.7308991  | 0.10181842  |
| 0.49478931 | 0.159572158 |
| 0.33433676 | 0.140936171 |
| 0.41550656 | 0.240558864 |
| 0.43999622 | 0.176620392 |
| 0.70381143 | 0.101207074 |
| 0.3348497  | 0.104487426 |
| 0.5781078  | 0.1191229   |
| 0.40840207 | 0.124237407 |
| 0.48292976 | 0.144510492 |
| 0.38820945 | 0.101039994 |
| 0.50944468 | 0.119751877 |
| 0.63447682 | 0.133278123 |
| 0.61235103 | 0.111187858 |
| 0.33198182 | 0.115095771 |
| 0.52818328 | 0.132775482 |
| 0.58090001 | 0.179035999 |
| 0.55885131 | 0.162087555 |
| 0.49626423 | 0.112529819 |
| 0.16550658 | 0.105469711 |
| 0.56672942 | 0.101795802 |
| 0.32379553 | 0.14750672  |
| 0.65073602 | 0.130672234 |
| 0.47320146 | 0.102480005 |
| 0.5701901  | 0.105724742 |
| 0.53663451 | 0.104570672 |
| 0.42338575 | 0.110974386 |
| 0.61123962 | 0.116941949 |
| 0.6591826  | 0.11369409  |

0.65706628 0.145916429  
0.35844121 0.100546269  
0.73007914 0.106615426  
0.22637868 0.112454419  
0.27259254 0.128851646  
0.23875446 0.103394848  
0.46196978 0.120261478  
0.32648897 0.100330879  
0.30021058 0.102954473  
0.48750827 0.112602484  
0.45279429 0.110106855  
0.4949892 0.108209695  
0.63200559 0.162630008  
0.6538991 0.107894329  
0.67809401 0.101739885  
0.68986757 0.118838385  
0.11701628 0.102075342  
0.52946652 0.155151775  
0.22698891 0.104335868  
0.57156342 0.10916268  
0.56674417 0.104867575  
0.30121981 0.106491112  
0.42492147 0.108058989  
0.69137132 0.124148122  
0.72892291 0.105743884  
0.4770814 0.113561105  
0.46926451 0.125563622  
0.68095363 0.135159315  
0.63338776 0.13861536  
0.62939761 0.140669097  
0.63284306 0.144068716  
0.59441427 0.178270894  
0.56741586 0.10760299  
0.31827309 0.248020286  
0.65413669 0.104836213  
0.58792512 0.124353782  
0.46925379 0.131001602  
0.46356415 0.148229742  
0.4714394 0.14905859  
0.32615979 0.124417368  
0.35759221 0.143007308  
0.51116724 0.147579814  
0.47471412 0.126566329  
0.29014115 0.133162892  
0.62873056 0.118379275  
0.43196582 0.121047634

0.51388202 0.202728382  
0.46777286 0.125810634  
0.36485159 0.128961432  
0.60339005 0.1383482  
0.47501854 0.165831893  
0.30359359 0.238343168  
0.64566753 0.104177559  
0.56158832 0.138840896  
0.49575797 0.103407741  
0.28758092 0.124330964  
0.58706172 0.139790057  
0.4646479 0.148905221  
0.43717692 0.134420867  
0.57685723 0.102421306  
0.66746095 0.106236989  
0.54188464 0.129928508  
0.45943536 0.1372634  
0.28197329 0.102590824  
0.32814159 0.130423306  
0.27784073 0.113419299  
0.28225059 0.118633488  
0.41815723 0.133869117  
0.55700354 0.113377511  
0.4883341 0.173851274  
0.34178033 0.107922525  
0.6337134 0.113482673  
0.45792449 0.10533931  
0.69770559 0.106135274  
0.47049831 0.113654973  
0.37013687 0.117979732  
0.40600822 0.124776703  
0.44194613 0.13556675  
0.47085055 0.17472528  
0.4862168 0.181393344  
0.42908814 0.198510965  
0.39792012 0.259019551  
0.43619048 0.137228424  
0.37672981 0.123559603  
0.32660518 0.102941141  
0.63314386 0.102646609  
0.28888359 0.126531388  
0.58847965 0.128877572  
0.43630251 0.131674921  
0.31937587 0.239342083  
0.72794161 0.102540553  
0.59896866 0.112216941



0.48642456 0.140692863  
0.46754372 0.106974617  
0.64090407 0.16742544  
0.58021938 0.177319726  
0.64982768 0.186153057  
0.70128795 0.144468523  
0.22691186 0.103183225  
0.28448085 0.153972705  
0.3196865 0.155835127  
0.17579403 0.108077631  
0.43037728 0.114285517  
0.55271821 0.10940256  
0.60939254 0.139947973  
0.67790719 0.127269672  
0.73556857 0.104006599  
0.67773953 0.107501065  
0.63786799 0.121684349  
0.49782441 0.12445488  
0.62894574 0.125935541  
0.61204243 0.128692838  
0.33100732 0.130772662  
0.6847831 0.111523333  
0.38507538 0.112745129  
0.24679502 0.207499212  
0.66155392 0.133714188  
0.63380134 0.115857332  
0.44175083 0.110930489  
0.48262561 0.137837185  
0.28887407 0.170886193  
0.606962 0.109410748  
0.58391395 0.110191322  
0.40689529 0.117479713  
0.32747738 0.12993379  
0.39970345 0.125376328  
0.67899822 0.135473313  
0.70560991 0.103935422  
0.39602327 0.102797324  
0.54739864 0.189345574  
0.326752 0.119075941  
0.70771242 0.125815564  
0.57967502 0.121176906  
0.38630029 0.148026056  
0.30889602 0.168799373  
0.2504059 0.180675935  
0.49713753 0.116339036  
0.67355724 0.118675458

0.64131469 0.172527271  
0.48740999 0.102152357  
0.68473425 0.108980089  
0.51483522 0.100408083  
0.38574915 0.143985246  
0.50104636 0.114839824  
0.40529214 0.10684645  
0.47898379 0.115444604  
0.17776804 0.147417721  
0.27194134 0.103216903  
0.37431449 0.147216369  
0.45321125 0.167914918  
0.36262317 0.170337935  
0.61363208 0.102759299  
0.43755923 0.103421573  
0.59479058 0.155456431  
0.59660056 0.165389296  
0.55631241 0.180611335  
0.2860311 0.200759804  
0.37850491 0.246180059  
0.50290009 0.111343624  
0.39471078 0.131712743  
0.40083295 0.116111871  
0.35449108 0.168203916  
0.53913637 0.132057892  
0.65214258 0.138518341  
0.56156043 0.167705809  
0.34518353 0.137111839  
0.2736738 0.274947647  
0.28576396 0.101768698  
0.28884717 0.314446941  
0.23220656 0.124696275  
0.53155125 0.133443844  
0.63374367 0.1345803  
0.1450386 0.139810346  
0.64903677 0.112871718  
0.41397824 0.106587875  
0.54452365 0.146058588  
0.44682099 0.105810566  
0.62605079 0.100828121  
0.30026812 0.123083748  
0.64084659 0.159072325  
0.59769093 0.101484568  
0.34875487 0.127574581  
0.53564766 0.115460017  
0.65261276 0.131895769

0.30877209 0.223689455  
0.20929399 0.226228086  
0.34655217 0.31790857  
0.5814094 0.154552169  
0.36903587 0.102935344  
0.60266931 0.133481152  
0.28292889 0.100055987  
0.33961357 0.108502928  
0.3221246 0.124530795  
0.39667292 0.138832961  
0.42629929 0.140904273  
0.52584812 0.160281193  
0.56843569 0.101201633  
0.50766654 0.120330517  
0.48164975 0.150368242  
0.45134607 0.103681375  
0.68587989 0.102037802  
0.20163504 0.10106645  
0.72503495 0.120544975  
0.22215979 0.103599367  
0.358043 0.19352701  
0.36403918 0.133225972  
0.56800133 0.163790945  
0.49824043 0.103864285  
0.53825552 0.105672192  
0.42979115 0.152825407  
0.70506809 0.100428017  
0.57427514 0.134188538  
0.61481368 0.168565508  
0.53343292 0.101147198  
0.22443409 0.156907622  
0.52500163 0.215626804  
0.39523967 0.110844538  
0.49596815 0.125199394  
0.22966153 0.127834218  
0.3314063 0.10133319  
0.30570324 0.158142371  
0.53621639 0.198924538  
0.35185361 0.11995461  
0.57250987 0.137659933  
0.59929451 0.164079495  
0.20671542 0.125640515  
0.68772927 0.129335213  
0.56000759 0.149512081  
0.42430581 0.148568338  
0.40883013 0.118140267

0.29593337 0.127761664  
0.23030624 0.110731588  
0.74307942 0.104814612  
0.66354501 0.149434122  
0.4901759 0.117893848  
0.42068596 0.137950959  
0.54343038 0.145836042  
0.52089724 0.146012598  
0.50866781 0.159448224  
0.36547062 0.101718903  
0.23734583 0.171753332  
0.24884034 0.148917972  
0.35566745 0.116562699  
0.51651784 0.101328705  
0.3244551 0.140200954  
0.38806089 0.175352897  
0.35302394 0.208146029  
0.45885987 0.111239068  
0.59037354 0.14783805  
0.43012972 0.102390672  
0.54301715 0.11893643  
0.64128043 0.135262808  
0.42559847 0.145088612  
0.58316007 0.156655886  
0.62320747 0.102716665  
0.46044976 0.153619044  
0.43674496 0.102893547  
0.62651821 0.130618282  
0.49820465 0.104825073  
0.55368932 0.108353235  
0.48970856 0.112213139  
0.52537168 0.124471988  
0.57189605 0.179201154  
0.48989161 0.184463578  
0.59288599 0.193760159  
0.34080386 0.108346658  
0.62461213 0.156421312  
0.56890886 0.150018848  
0.71511748 0.111773995  
0.53041536 0.114077091  
0.6257951 0.11532323  
0.6289965 0.118823541  
0.4859662 0.150901991  
0.58231049 0.160868201  
0.31980672 0.135768462  
0.49089209 0.107541922

0.37526415 0.130190426  
0.56820036 0.115893248  
0.32930469 0.113253366  
0.45316581 0.102536379  
0.57338128 0.106443518  
0.61339437 0.108921836  
0.3383494 0.118033212  
0.72003578 0.120976921  
0.16840472 0.130338286  
0.47842849 0.139500501  
0.39111168 0.144311576  
0.3160261 0.145025913  
0.45711641 0.155421697  
0.17658563 0.156383122  
0.60526604 0.193283942  
0.26838243 0.195048212  
0.26831331 0.140327169  
0.47933859 0.111801737  
0.46054265 0.115434577  
0.49346378 0.135236299  
0.36173721 0.128778555  
0.62122457 0.111394647  
0.32556369 0.122775168  
0.42163789 0.156672652  
0.36094522 0.121264321  
0.36255928 0.102559137  
0.39316629 0.103391186  
0.71921034 0.125352515  
0.46320955 0.132574014  
0.32584235 0.103993999  
0.65915208 0.107636973  
0.373991 0.125623612  
0.57683212 0.121227249  
0.54876026 0.152408491  
0.57963503 0.16856072  
0.40119032 0.119972979  
0.62849804 0.193639267  
0.38091738 0.176723208  
0.48171572 0.140704108  
0.67176132 0.116974087  
0.41467201 0.144161104  
0.48346348 0.108056826  
0.3531797 0.289525742  
0.39752488 0.129683329  
0.3078677 0.129026298  
0.60726417 0.100247655

0.62027775 0.103732232  
0.60436339 0.148214569  
0.4593934 0.194760533  
0.37344226 0.102763078  
0.25534192 0.118946739  
0.39955958 0.226881073  
0.32027162 0.101343711  
0.51008999 0.120035407  
0.30581426 0.127989128  
0.59495407 0.103680465  
0.296437 0.143330473  
0.67708746 0.11373648  
0.33465897 0.112370349  
0.27061972 0.105735107  
0.63897566 0.119905828  
0.38131794 0.107705407  
0.56665606 0.135395015  
0.36512124 0.116641735  
0.34013113 0.100465798  
0.39212365 0.13318324  
0.54244153 0.150740733  
0.40147621 0.227924063  
0.45938817 0.108476503  
0.63932848 0.102564257  
0.50272728 0.103135235  
0.26141946 0.129130698  
0.53037512 0.132086832  
0.5789655 0.138419266  
0.61351818 0.156125062  
0.28086823 0.107401332  
0.49449376 0.119943336  
0.53567272 0.116043528  
0.61896874 0.130223148  
0.45992259 0.157929453  
0.26787076 0.173187546  
0.15642868 0.125580666  
0.14727088 0.140743404  
0.60924959 0.104014202  
0.6005236 0.107273002  
0.65798175 0.118937787  
0.33879992 0.123058187  
0.63193264 0.125547915  
0.18301856 0.136003958  
0.53059514 0.145938635  
0.42138094 0.153439872  
0.34367501 0.162971409

|            |             |
|------------|-------------|
| 0.34887902 | 0.172903806 |
| 0.4736064  | 0.174440627 |
| 0.32136065 | 0.107077408 |
| 0.47821314 | 0.107742233 |
| 0.68044478 | 0.119643013 |
| 0.2615922  | 0.122414897 |
| 0.53419286 | 0.130603699 |
| 0.58098565 | 0.136609773 |
| 0.56785194 | 0.139104993 |
| 0.45510581 | 0.14485082  |
| 0.54814048 | 0.156025871 |
| 0.42309015 | 0.185244116 |
| 0.54280744 | 0.189275794 |
| 0.10594181 | 0.117872017 |
| 0.22714977 | 0.15096402  |
| 0.12476824 | 0.15647113  |
| 0.19247215 | 0.199963493 |
| 0.45129489 | 0.21881756  |
| 0.3670458  | 0.258018058 |
| 0.18000622 | 0.260139485 |
| 0.19651488 | 0.275853089 |
| 0.21577038 | 0.299649059 |
| 0.2296552  | 0.359445735 |
| 0.26415662 | 0.395131721 |
| 0.32081315 | 0.397251292 |
| 0.27656582 | 0.408995368 |
| 0.34196741 | 0.425291868 |
| 0.65390233 | 0.124767572 |
| 0.32875711 | 0.14852536  |
| 0.17868831 | 0.101607904 |
| 0.16438913 | 0.116002706 |
| 0.18875226 | 0.121240431 |
| 0.58457512 | 0.142733091 |
| 0.28994116 | 0.151689168 |
| 0.21700399 | 0.152112169 |
| 0.17346152 | 0.159123256 |
| 0.14786083 | 0.183973629 |
| 0.3457141  | 0.195835872 |
| 0.31998725 | 0.203058664 |
| 0.23906111 | 0.204585077 |
| 0.19518243 | 0.207569032 |
| 0.19507114 | 0.260532616 |
| 0.38216894 | 0.273043955 |
| 0.53692005 | 0.283234772 |
| 0.21946968 | 0.300720077 |
| 0.23174864 | 0.310961643 |

0.33663558 0.353794485  
0.27070578 0.357857342  
0.35784216 0.37301751  
0.25453787 0.37765994  
0.37979908 0.378037354  
0.36260455 0.38349851  
0.28850653 0.384618397  
0.37819133 0.390282658  
0.37531996 0.399176329  
0.32181698 0.467173381  
0.66634293 0.117529295  
0.41811614 0.139915958  
0.49010601 0.122084905  
0.57777358 0.121602194  
0.55617354 0.115552613  
0.60969675 0.123938695  
0.50677404 0.100016388  
0.29290102 0.101048414  
0.48897321 0.105604114  
0.46783521 0.114932861  
0.47221689 0.15757645  
0.44748273 0.166227809  
0.4853616 0.163510077  
0.22574555 0.108920208  
0.55910979 0.119732751  
0.37824722 0.152660589  
0.45211037 0.195525669  
0.2579478 0.128283996  
0.38879928 0.172605824  
0.23164392 0.19985626  
0.31248866 0.10029617  
0.23978996 0.103318044  
0.18386208 0.126303417  
0.27307193 0.165266553  
0.32178513 0.172021965  
0.39620402 0.219814763  
0.29066404 0.393111047  
0.66467018 0.111087925  
0.58409148 0.119080613  
0.49170993 0.102828859  
0.39644985 0.133009565  
0.67736776 0.121305924  
0.47618953 0.117678259  
0.68334012 0.156651985  
0.38884742 0.141058398  
0.32589361 0.166032684



0.25801318 0.148852651  
0.5340578 0.100870631  
0.56234267 0.172849081  
0.49036462 0.143398536  
0.40540493 0.147797398  
0.42083606 0.124062142  
0.42406594 0.165336755  
0.31090271 0.189925434  
0.4500359 0.105744222  
0.71984143 0.102682141  
0.72178795 0.112628381  
0.21434967 0.10887295  
0.59767252 0.120640163  
0.44984113 0.153487012  
0.31435028 0.143358078  
0.73329279 0.107980128  
0.51158082 0.131121843  
0.66922452 0.147337751  
0.35724435 0.1343443  
0.58245236 0.187788845  
0.38981345 0.110174773  
0.58151254 0.126947206  
0.63268117 0.127122608  
0.70929604 0.101529116  
0.38847303 0.109641162  
0.52711332 0.105548381  
0.76229933 0.112625996  
0.29230404 0.292820089  
0.45393805 0.125714272  
0.56490324 0.100402322  
0.57971814 0.114877399  
0.32033613 0.134502163  
0.67614872 0.154782898  
0.76588374 0.103413346  
0.67432101 0.110739938  
0.18019041 0.125507551  
0.48498177 0.184051471  
0.77300164 0.100447411  
0.36361925 0.115899259  
0.54163651 0.136980981  
0.4310673 0.132993856  
0.29805072 0.117987803  
0.30019132 0.143954053  
0.40647611 0.107333507  
0.18887555 0.104512776  
0.34994588 0.132391214

0.33471603 0.184243611  
0.44695537 0.120680966  
0.32397796 0.102314115  
0.4767495 0.169207038  
0.53941398 0.117786192  
0.35170337 0.105952558  
0.61414885 0.182886407  
0.38409323 0.106580115  
0.58609591 0.14036361  
0.49074807 0.121024814  
0.65338214 0.121195151  
0.43747316 0.158033295  
0.71020859 0.100117781  
0.60050316 0.125962727  
0.55060362 0.121309764  
0.66487434 0.100755671  
0.43789218 0.146203149  
0.58533123 0.10641318  
0.56241669 0.107770733  
0.43879992 0.109684327  
0.13006006 0.116616077  
0.18824277 0.188256848  
0.40646009 0.117065339  
0.27204494 0.143922887  
0.57249786 0.127713961  
0.46733115 0.165127804  
0.4498183 0.178891773  
0.4504869 0.185470191  
0.75411374 0.109123733  
0.20330517 0.174487426  
0.44136467 0.178345764  
0.22449257 0.117122212  
0.23550784 0.171944719  
0.58454302 0.115649491  
0.47521454 0.123775503  
0.43991904 0.164387611  
0.29781609 0.109864642  
0.59793595 0.10138102  
0.45496162 0.105603529  
0.28803126 0.10948855  
0.43327091 0.110095577  
0.25827911 0.143311679  
0.55476038 0.111342311  
0.38943456 0.119783891  
0.48522256 0.126533033  
0.3640694 0.133747457

0.53169283 0.164056836  
0.27489638 0.179837219  
0.32604777 0.187184041  
0.54899697 0.102886858  
0.62555452 0.126992391  
0.49295473 0.107936377  
0.76691237 0.134852318  
0.24367867 0.162375566  
0.68603495 0.10711246  
0.30558909 0.158352882  
0.48827004 0.117376607  
0.65667685 0.1026912  
0.46410849 0.10800188  
0.59831682 0.111758437  
0.41304199 0.125571432  
0.67783034 0.132595764  
0.61727761 0.11619113  
0.6737457 0.152297919  
0.69863846 0.167515428  
0.60956742 0.196336469  
0.40288534 0.108119244  
0.37921214 0.199981567  
0.72166826 0.115651299  
0.42588082 0.162410328  
0.58760027 0.119925296  
0.27392924 0.121835883  
0.53964071 0.13747546  
0.35471947 0.148545718  
0.36094739 0.173758431  
0.61637512 0.190717082  
0.51841113 0.108248789  
0.39102352 0.148874691  
0.18504131 0.129156679  
0.22837173 0.101486314  
0.30364494 0.110973765  
0.52673074 0.108172625  
0.49452421 0.169412462  
0.23424577 0.110530782  
0.4161814 0.198376887  
0.39980397 0.112069561  
0.65727671 0.174470375  
0.68497461 0.180716575  
0.76395495 0.122932135  
0.35220824 0.139253173  
0.39547681 0.149105768  
0.44098458 0.115017736

|            |             |
|------------|-------------|
| 0.47568097 | 0.173094514 |
| 0.26356967 | 0.163490706 |
| 0.4452271  | 0.100005736 |
| 0.43699439 | 0.100042213 |
| 0.48104497 | 0.1000964   |
| 0.31094558 | 0.100123751 |
| 0.10641715 | 0.100126309 |
| 0.55133099 | 0.100160794 |
| 0.38097637 | 0.100164646 |
| 0.53336602 | 0.100188567 |
| 0.387659   | 0.100195279 |
| 0.50171919 | 0.100203388 |
| 0.28235554 | 0.10022358  |
| 0.50060341 | 0.1002504   |
| 0.34442908 | 0.100274447 |
| 0.30552518 | 0.100301998 |
| 0.52321844 | 0.100303839 |
| 0.74562741 | 0.100315468 |
| 0.44667797 | 0.100351242 |
| 0.3340105  | 0.100399678 |
| 0.19511003 | 0.10042116  |
| 0.32421662 | 0.10042539  |
| 0.51738416 | 0.10044941  |
| 0.56180029 | 0.100483063 |
| 0.6558799  | 0.100486561 |
| 0.24539097 | 0.10050841  |
| 0.43038664 | 0.1005348   |
| 0.64197522 | 0.100569325 |
| 0.57472139 | 0.100652586 |
| 0.2489724  | 0.100689897 |
| 0.64343413 | 0.100743367 |
| 0.25061681 | 0.100756549 |
| 0.61698593 | 0.100784529 |
| 0.37756105 | 0.100875958 |
| 0.74135801 | 0.100876607 |
| 0.38297534 | 0.100891851 |
| 0.28569577 | 0.100919897 |
| 0.64203501 | 0.100980509 |
| 0.67412934 | 0.10103264  |
| 0.77553896 | 0.101045348 |
| 0.49372196 | 0.101047888 |
| 0.13687692 | 0.10104991  |
| 0.37764653 | 0.101076708 |
| 0.11940554 | 0.101119047 |
| 0.16722853 | 0.101125173 |
| 0.52391429 | 0.10112944  |

0.69908254 0.101137909  
0.40135072 0.101269565  
0.37733003 0.101279904  
0.33472681 0.101298247  
0.71731354 0.101471413  
0.21536419 0.101519827  
0.64533239 0.101530955  
0.71855708 0.101561256  
0.75161662 0.101575888  
0.75934168 0.101622966  
0.35892998 0.101625617  
0.23625327 0.101634741  
0.21675977 0.101718038  
0.65430414 0.101749779  
0.32068747 0.101914566  
0.57621653 0.101917198  
0.15429882 0.101941531  
0.36268554 0.101948703  
0.52835513 0.102065507  
0.17705361 0.102167788  
0.66832241 0.102251739  
0.26318525 0.10226984  
0.36262221 0.102272879  
0.2121357 0.10234204  
0.42005714 0.102350984  
0.7223756 0.102425012  
0.75316891 0.102482995  
0.47677033 0.102598101  
0.7438652 0.102659701  
0.18707953 0.102684538  
0.28917308 0.10268959  
0.24132489 0.102701603  
0.49444667 0.102737226  
0.41329637 0.102752207  
0.44160931 0.102789649  
0.54909224 0.102796441  
0.16163688 0.102839826  
0.45285723 0.102899511  
0.34069699 0.102922415  
0.24454522 0.102945406  
0.54674324 0.103039914  
0.29143237 0.103074301  
0.30940724 0.103127582  
0.53903647 0.103134432  
0.34121231 0.103287285  
0.61079024 0.103295792

0.38135402 0.103327386  
0.39510123 0.103385753  
0.47977774 0.10353329  
0.50302362 0.103543638  
0.27940541 0.103544452  
0.6092217 0.103576935  
0.69978434 0.103594636  
0.645535 0.103603716  
0.40474309 0.103604463  
0.47628093 0.103617656  
0.59569648 0.103632679  
0.34565358 0.103636919  
0.73551393 0.103830356  
0.66576149 0.103864102  
0.54624228 0.103921533  
0.63800875 0.103939193  
0.26210286 0.10417802  
0.5928155 0.104262634  
0.23438855 0.104271521  
0.49201009 0.104314369  
0.57615465 0.104339851  
0.70748645 0.104342707  
0.50983885 0.10438509  
0.69193156 0.104415817  
0.57567135 0.104467441  
0.56177976 0.104505189  
0.46413069 0.104512795  
0.28764638 0.104604674  
0.51191399 0.104711422  
0.73470586 0.1047286  
0.7776423 0.104809315  
0.55415099 0.104854716  
0.57511299 0.104860901  
0.59562692 0.104890965  
0.54392519 0.10510876  
0.55157233 0.105118316  
0.11674682 0.10514123  
0.4695195 0.105185278  
0.66897527 0.105185962  
0.08750691 0.105235902  
0.48529108 0.105239403  
0.46291515 0.105264563  
0.64675773 0.105320553  
0.26341264 0.105355972  
0.44440163 0.105377043  
0.66004622 0.105395427

0.47134287 0.105396827  
0.42990293 0.105401822  
0.657561 0.105432702  
0.41870385 0.105457753  
0.17431968 0.105463907  
0.64523147 0.105464273  
0.64747319 0.10552969  
0.33548282 0.105626582  
0.74809545 0.105655877  
0.65368581 0.105768156  
0.41658424 0.105789957  
0.19563558 0.105839022  
0.18931808 0.105878228  
0.64542215 0.105896489  
0.51943061 0.10592846  
0.49603004 0.10594001  
0.72257839 0.105970818  
0.60246171 0.106007703  
0.59021724 0.106038117  
0.25672993 0.106235274  
0.62385344 0.10630781  
0.21775196 0.106415143  
0.6762814 0.106428267  
0.65576369 0.106534764  
0.54322039 0.106729214  
0.54678501 0.10673754  
0.26024052 0.106745092  
0.73543341 0.106791525  
0.2345248 0.106836737  
0.62075187 0.106860405  
0.14444414 0.106893491  
0.2850179 0.106903362  
0.26981392 0.106907552  
0.45070355 0.106950812  
0.467897 0.106982027  
0.5798774 0.107063352  
0.60102589 0.107083909  
0.37985473 0.107105079  
0.77266576 0.10711166  
0.64114424 0.107162756  
0.37356028 0.107251343  
0.6105204 0.107299492  
0.64287089 0.10732103  
0.15542601 0.107426375  
0.72083039 0.107465241  
0.48667234 0.107486715

0.22877956 0.107494368  
0.65477321 0.107506352  
0.3806006 0.107511542  
0.46781396 0.107612302  
0.18228638 0.107614901  
0.40090266 0.107633353  
0.57585196 0.107736588  
0.56367148 0.107879829  
0.64169738 0.107981654  
0.64993877 0.107991634  
0.68605963 0.10811245  
0.6184578 0.108119957  
0.21611725 0.108153794  
0.69614636 0.108191021  
0.43650727 0.108207629  
0.65197444 0.108215503  
0.1641437 0.108229842  
0.67751104 0.108234033  
0.30466724 0.108387654  
0.45659152 0.108391422  
0.40536893 0.108442459  
0.44928971 0.108502744  
0.60769075 0.108522637  
0.49868241 0.108535117  
0.47313334 0.108577493  
0.29906072 0.108657032  
0.3087381 0.108748444  
0.50694674 0.10875621  
0.6944292 0.108760048  
0.43581183 0.108784253  
0.42361639 0.108816188  
0.47336147 0.108865921  
0.12482752 0.108875918  
0.15230635 0.108915114  
0.49972445 0.108922462  
0.48354909 0.108940921  
0.74285116 0.108968411  
0.73813235 0.108999975  
0.49166315 0.109077744  
0.63412149 0.109094592  
0.67103211 0.109143092  
0.15343197 0.109152714  
0.30585822 0.109155254  
0.51275032 0.109166695  
0.58482667 0.109171637  
0.43247361 0.109209146



0.59511213 0.109351591  
0.68514626 0.109410323  
0.74276045 0.109440363  
0.43284541 0.109572408  
0.55421736 0.109644251  
0.20397938 0.109723781  
0.59062588 0.109729263  
0.213697 0.109771568  
0.49633409 0.10982332  
0.13886701 0.109878749  
0.33510583 0.109985464  
0.59019343 0.110105986  
0.50771299 0.110109204  
0.53676085 0.110122554  
0.63011132 0.110236032  
0.62216376 0.110261468  
0.54654405 0.110289563  
0.42785092 0.110382282  
0.23169643 0.110410419  
0.1826414 0.110414367  
0.48630729 0.110446398  
0.53293692 0.110562201  
0.31083175 0.110589741  
0.33162052 0.110729822  
0.19111471 0.110737337  
0.4403072 0.110758902  
0.68304912 0.110772357  
0.47459765 0.110800421  
0.78934948 0.11082018  
0.19320131 0.110852077  
0.42451755 0.11105191  
0.48296846 0.111057959  
0.46248542 0.111103709  
0.64337049 0.111149798  
0.61915956 0.111195566  
0.58874313 0.111253494  
0.53512039 0.111290953  
0.20926803 0.111352667  
0.58056699 0.111452358  
0.65851234 0.111608981  
0.66845334 0.111658839  
0.61443704 0.111664397  
0.30294521 0.111693901  
0.3109536 0.111721241  
0.3713092 0.111721541  
0.42894337 0.111727056

0.73193094 0.111737617  
0.5206622 0.111749652  
0.7594078 0.111768947  
0.56188197 0.11187669  
0.15413902 0.111879353  
0.57710152 0.111882749  
0.61094991 0.111901343  
0.40937407 0.111916432  
0.43670116 0.111987976  
0.60584899 0.112135933  
0.60652578 0.112174765  
0.29367119 0.11221624  
0.70922374 0.112288968  
0.52994165 0.112307141  
0.77798535 0.112320484  
0.39518771 0.112347941  
0.52907788 0.112521184  
0.59185634 0.112580934  
0.28654138 0.112618934  
0.57913045 0.11278025  
0.379147 0.112816964  
0.65155466 0.112826605  
0.64786886 0.11285856  
0.29798538 0.112859128  
0.46447305 0.11291792  
0.53548323 0.112960333  
0.49469466 0.112976246  
0.51576069 0.112984709  
0.59237043 0.113038993  
0.6530871 0.113044158  
0.34201146 0.1130604  
0.3990348 0.113130806  
0.68180849 0.113157662  
0.58539397 0.113188726  
0.4840889 0.113294891  
0.59455125 0.113330944  
0.61306753 0.113348227  
0.55898839 0.113468363  
0.45474972 0.113503714  
0.43300284 0.113566209  
0.39080421 0.1136286  
0.23039988 0.113656339  
0.63616183 0.113681131  
0.48437044 0.113891569  
0.46557064 0.113900192  
0.24604687 0.113939582

0.27281455 0.11402466  
0.60566964 0.114029951  
0.27976998 0.114110535  
0.30648144 0.114123546  
0.75207119 0.114139111  
0.41351328 0.114431523  
0.26094147 0.114586697  
0.43037735 0.114651097  
0.51071979 0.114671111  
0.33066098 0.114726849  
0.26012033 0.114730478  
0.31414634 0.114776969  
0.69067878 0.114780784  
0.62504989 0.114819837  
0.31685268 0.114822261  
0.53451411 0.114891937  
0.39881204 0.11494576  
0.58148959 0.115016733  
0.23231112 0.115033887  
0.32621932 0.115126216  
0.68888654 0.115142364  
0.43786137 0.115152347  
0.46729748 0.115164177  
0.64092767 0.115177771  
0.69457078 0.115186075  
0.30224429 0.115217081  
0.15194324 0.115257834  
0.51568505 0.115328206  
0.43240105 0.115337385  
0.50708454 0.115419308  
0.56987155 0.115464954  
0.45035595 0.115472211  
0.49068559 0.11547351  
0.18151777 0.115538299  
0.37203498 0.115670185  
0.33869317 0.11567673  
0.50205075 0.115730792  
0.43482237 0.115790089  
0.58335908 0.115793377  
0.59134023 0.115804436  
0.46134436 0.115911398  
0.19463352 0.115983935  
0.67438188 0.115989405  
0.55318521 0.116020244  
0.20374005 0.11615335  
0.53278647 0.116182347

0.27464413 0.116206952  
0.62459801 0.116218319  
0.41874046 0.116413188  
0.67233999 0.116644987  
0.17195418 0.116706054  
0.32662048 0.116789031  
0.72604278 0.116806921  
0.21973529 0.116890148  
0.57444453 0.116892094  
0.52458248 0.116954539  
0.37063399 0.117085138  
0.42369869 0.117198308  
0.14263911 0.117250533  
0.55606596 0.117355386  
0.45682498 0.117359526  
0.36857503 0.117391769  
0.46584156 0.117415639  
0.54410393 0.117478929  
0.44001086 0.117497396  
0.55067219 0.117536373  
0.6262784 0.117555882  
0.66912354 0.117578524  
0.25584038 0.117774303  
0.4038607 0.117829967  
0.55949323 0.117918707  
0.5684496 0.117963713  
0.65183054 0.117979961  
0.25032024 0.118157191  
0.14216386 0.118242277  
0.70726694 0.11832716  
0.47539283 0.118394647  
0.15461727 0.118478517  
0.66670331 0.11865232  
0.50611728 0.118700474  
0.37754636 0.118719768  
0.51093496 0.118775456  
0.50540045 0.118794306  
0.67506153 0.118809355  
0.43401324 0.11881377  
0.40118402 0.118829248  
0.18707923 0.118898318  
0.28533018 0.11908282  
0.63873492 0.119122783  
0.48182936 0.119167538  
0.31441758 0.119211948  
0.78089245 0.119254232

0.27360714 0.119603958  
0.30276089 0.119659028  
0.16556228 0.119676964  
0.67709514 0.119764364  
0.59996985 0.119807585  
0.64349745 0.119898597  
0.59508677 0.119908334  
0.20662811 0.119934617  
0.27425877 0.120016447  
0.63982245 0.120130706  
0.31574918 0.120262129  
0.4325098 0.120264828  
0.6312256 0.120376533  
0.50514391 0.120638099  
0.45286328 0.120661807  
0.62984621 0.120713633  
0.72423641 0.120716865  
0.34295029 0.120744863  
0.49812943 0.120767594  
0.43482857 0.120771722  
0.26215134 0.120799489  
0.15148291 0.120875077  
0.31012563 0.120971353  
0.33350122 0.121075852  
0.35061698 0.12125663  
0.13259618 0.121393327  
0.39000883 0.121523088  
0.37111102 0.121536747  
0.27737547 0.121597906  
0.64022242 0.121647849  
0.16442388 0.121718681  
0.14396263 0.121732436  
0.50904756 0.121744408  
0.34375132 0.121808779  
0.26754691 0.121931833  
0.28676509 0.12205877  
0.43568786 0.122124944  
0.25057489 0.122181092  
0.57533921 0.122339446  
0.62329578 0.122583477  
0.48342902 0.122789487  
0.55762507 0.122792471  
0.18278434 0.122804443  
0.61931459 0.12283523  
0.20221082 0.122874885  
0.6851965 0.12291841

0.50845623 0.122941464  
0.71891205 0.122984488  
0.48955208 0.123175006  
0.53622953 0.123205002  
0.29055655 0.123266705  
0.53488227 0.123323279  
0.5596896 0.123365098  
0.52394147 0.123434564  
0.53614471 0.12346493  
0.29150951 0.123590992  
0.25132635 0.123799072  
0.57060316 0.123799555  
0.41797267 0.123942381  
0.44009515 0.123957425  
0.26996504 0.123975478  
0.34096037 0.124013635  
0.65817684 0.124233816  
0.14549592 0.124285391  
0.15724167 0.124288253  
0.64474409 0.124310711  
0.48099939 0.124471787  
0.59150766 0.1246318  
0.26707797 0.124663354  
0.35567411 0.124739192  
0.19245566 0.124743986  
0.31402827 0.12478548  
0.25666706 0.124830922  
0.19235474 0.124833117  
0.51441497 0.125031429  
0.56458272 0.125063098  
0.68954547 0.125078421  
0.62658965 0.125125299  
0.32233257 0.125372681  
0.35445238 0.125376767  
0.43082728 0.125514811  
0.23178213 0.125539351  
0.09866459 0.125554645  
0.56256456 0.125739263  
0.6632377 0.12577572  
0.10108912 0.125902983  
0.31333216 0.126091335  
0.69443308 0.126184387  
0.63846491 0.126189199  
0.6765053 0.126232292  
0.37388943 0.126285749  
0.45253139 0.126343811

0.40898122 0.126405475  
0.46767435 0.126502949  
0.3745216 0.126597647  
0.35500586 0.126661154  
0.55434531 0.126675518  
0.45204596 0.12674443  
0.48004192 0.126764348  
0.48506062 0.126787379  
0.65029416 0.127000651  
0.42544752 0.127015613  
0.7011083 0.127135074  
0.4081643 0.127223264  
0.42926975 0.127239978  
0.18381914 0.127281833  
0.76886039 0.127302187  
0.3232314 0.127366828  
0.38373844 0.127384002  
0.43528798 0.127498655  
0.3907981 0.127517597  
0.36412871 0.127552568  
0.58408944 0.127560192  
0.44225549 0.127653188  
0.56403973 0.12771442  
0.59661117 0.12782205  
0.59489857 0.127970071  
0.38530533 0.128021142  
0.64127838 0.128080381  
0.57048103 0.128153265  
0.39419949 0.128335144  
0.70814264 0.128353323  
0.72852971 0.12838055  
0.48966633 0.128795713  
0.58484039 0.129017489  
0.45059885 0.129041799  
0.46356241 0.129051204  
0.51767644 0.129092065  
0.57374877 0.129321379  
0.74125358 0.129378954  
0.38973817 0.129652033  
0.60025411 0.129698969  
0.75576381 0.129730857  
0.19600632 0.129853134  
0.47097416 0.129885013  
0.35972385 0.129892785  
0.456651 0.129924873  
0.51249672 0.130177656

0.22491899 0.130184322  
0.452033 0.130356939  
0.50398263 0.130358161  
0.71622837 0.130386054  
0.41674478 0.130425826  
0.3265508 0.130443436  
0.27882306 0.130443555  
0.45740914 0.130566981  
0.44838186 0.130628335  
0.26258886 0.130763009  
0.60275779 0.130901359  
0.26107027 0.130930852  
0.41191866 0.130935114  
0.35870633 0.131026237  
0.59000504 0.131087567  
0.40657716 0.131193127  
0.34316509 0.131230932  
0.40097869 0.1312534  
0.39609053 0.131415293  
0.47790091 0.1316121  
0.2069218 0.131771814  
0.36086797 0.131837354  
0.42669173 0.132082082  
0.48879 0.132204901  
0.47899914 0.132343602  
0.41688745 0.132462442  
0.24843756 0.132561411  
0.48372568 0.132828163  
0.34045456 0.132849939  
0.62894287 0.132876541  
0.6016916 0.132891419  
0.54715096 0.132921513  
0.62746458 0.132983584  
0.51661512 0.133009095  
0.33735755 0.133026119  
0.76572953 0.133134981  
0.6499781 0.133179097  
0.22343007 0.133258547  
0.24697141 0.133320748  
0.35071155 0.133363623  
0.46517401 0.133380888  
0.34085973 0.133429637  
0.4291889 0.133587269  
0.1787553 0.133622512  
0.27647677 0.133649051  
0.20508517 0.133785113



0.28954896 0.134035998  
0.23866489 0.134067213  
0.51256201 0.134259601  
0.39642534 0.134298875  
0.58318834 0.134348658  
0.39673364 0.134478476  
0.37892138 0.134645378  
0.54018115 0.134911062  
0.39203955 0.134942102  
0.51662897 0.134997495  
0.55698736 0.135012614  
0.16133458 0.135051442  
0.24902796 0.135066922  
0.51745212 0.13513794  
0.30563269 0.135156448  
0.49935415 0.135221799  
0.18052156 0.135417778  
0.35826381 0.135422342  
0.44582055 0.135824999  
0.46507752 0.135958512  
0.49663265 0.136042646  
0.43723703 0.136099435  
0.55834348 0.136140338  
0.51015762 0.136470544  
0.39770103 0.136511915  
0.32508129 0.136535699  
0.34095769 0.136576986  
0.70408238 0.136775187  
0.3500744 0.136788426  
0.31213421 0.136818742  
0.3038847 0.136955324  
0.30870982 0.137500487  
0.2370046 0.137640687  
0.33516162 0.138008318  
0.27939285 0.138034155  
0.34125211 0.13814016  
0.59519945 0.138271097  
0.57912887 0.138424142  
0.34228367 0.138517758  
0.57676122 0.138528795  
0.33220784 0.138535303  
0.6684848 0.138933546  
0.46551553 0.138965795  
0.55369243 0.139001158  
0.56745369 0.139053935  
0.39258969 0.139180362

0.44784726 0.139258181  
0.46738347 0.139436159  
0.27294717 0.139479797  
0.66329804 0.139909935  
0.69959339 0.140002174  
0.63217338 0.140009841  
0.3722443 0.140048152  
0.47128451 0.140181119  
0.60121418 0.14030476  
0.31520156 0.14043042  
0.26573104 0.140430789  
0.24363653 0.140472065  
0.43920041 0.140516161  
0.23048071 0.140520862  
0.73259799 0.140577734  
0.62676465 0.140611969  
0.43920931 0.140673028  
0.56840958 0.140816674  
0.68547189 0.141017353  
0.20784132 0.141148418  
0.387356 0.141168641  
0.25920192 0.141311829  
0.47206009 0.141366859  
0.27934749 0.141598419  
0.15387374 0.141629765  
0.70051556 0.141725715  
0.18956959 0.141884512  
0.10178588 0.14191563  
0.43073384 0.141933031  
0.72415608 0.142010606  
0.28228176 0.142025955  
0.5049739 0.142074373  
0.38636591 0.142209961  
0.21972343 0.142301293  
0.53952525 0.142372074  
0.4075506 0.14239495  
0.37266581 0.142591311  
0.31948493 0.142694459  
0.29815303 0.142793455  
0.4705075 0.142807301  
0.71351287 0.142841281  
0.33609632 0.142877451  
0.61280235 0.142965483  
0.31536913 0.142991221  
0.34871333 0.14325123  
0.21355584 0.143314015

|            |             |
|------------|-------------|
| 0.4922629  | 0.143449384 |
| 0.35289326 | 0.143676934 |
| 0.5284063  | 0.14370111  |
| 0.52110698 | 0.143740377 |
| 0.31527733 | 0.143765595 |
| 0.19612568 | 0.143924934 |
| 0.53499634 | 0.143931058 |
| 0.33224278 | 0.143958577 |
| 0.32661535 | 0.143966259 |
| 0.28658125 | 0.143998228 |
| 0.44161939 | 0.144001509 |
| 0.4994728  | 0.14401099  |
| 0.35851508 | 0.144197998 |
| 0.48268705 | 0.144444229 |
| 0.64897947 | 0.144552347 |
| 0.24519967 | 0.144787046 |
| 0.40815133 | 0.144805932 |
| 0.49494397 | 0.145015073 |
| 0.22639272 | 0.145022242 |
| 0.52604583 | 0.145169002 |
| 0.64506227 | 0.145210445 |
| 0.23709555 | 0.145312618 |
| 0.60964374 | 0.145682155 |
| 0.37759258 | 0.145774627 |
| 0.44247368 | 0.146196395 |
| 0.23056455 | 0.146213606 |
| 0.64885822 | 0.146518827 |
| 0.4851827  | 0.146523092 |
| 0.30571574 | 0.147221456 |
| 0.42712356 | 0.147236629 |
| 0.37969661 | 0.147288332 |
| 0.51247877 | 0.147288805 |
| 0.77290873 | 0.147679294 |
| 0.42316149 | 0.147896541 |
| 0.33068858 | 0.147898991 |
| 0.22165321 | 0.147942037 |
| 0.19662027 | 0.147979756 |
| 0.31868851 | 0.148020022 |
| 0.56481548 | 0.148046317 |
| 0.44201093 | 0.148264769 |
| 0.59085347 | 0.148264908 |
| 0.5986212  | 0.148335191 |
| 0.30991463 | 0.148449491 |
| 0.64566878 | 0.148459054 |
| 0.29379673 | 0.148598446 |
| 0.36547455 | 0.148827185 |

0.36282599 0.148984868  
0.15886679 0.149490977  
0.59485278 0.149576134  
0.74675847 0.149680986  
0.39502861 0.149681847  
0.31561802 0.149793168  
0.57466714 0.149903767  
0.5954961 0.149914941  
0.44850834 0.150033429  
0.40167163 0.150107184  
0.24647536 0.150193432  
0.6319446 0.15044897  
0.56340402 0.150621359  
0.41850617 0.150823174  
0.19386164 0.15085332  
0.27474253 0.150907715  
0.39049436 0.151005981  
0.66521433 0.151024548  
0.21986938 0.151747195  
0.69312693 0.151751326  
0.42282162 0.151759145  
0.30328332 0.151798983  
0.304975 0.151833617  
0.34592975 0.152310942  
0.29902462 0.152674836  
0.46214602 0.152681585  
0.28359041 0.152798542  
0.28294962 0.15343546  
0.28529304 0.153575281  
0.3171557 0.153595089  
0.23872673 0.153657123  
0.61748367 0.153770464  
0.3504622 0.153947369  
0.52427197 0.154071143  
0.54588164 0.154112588  
0.26571722 0.154301863  
0.33182316 0.154409727  
0.30905194 0.154511904  
0.13079737 0.15468992  
0.19568517 0.1547858  
0.40231449 0.154911584  
0.44613128 0.155492398  
0.53887691 0.155615899  
0.32441403 0.155769927  
0.50304447 0.155781528  
0.57909211 0.155915713

0.67781823 0.15605828  
0.44107974 0.156367706  
0.63466274 0.156719129  
0.29115353 0.157488942  
0.53754556 0.157512379  
0.4381089 0.158040781  
0.59405903 0.158130943  
0.58657031 0.158864613  
0.40166234 0.158992172  
0.58590226 0.159007883  
0.43070174 0.159205816  
0.61595606 0.159277701  
0.30167498 0.159524748  
0.42293658 0.159700565  
0.33968085 0.159754013  
0.48389266 0.15991022  
0.49646458 0.16002031  
0.38841237 0.160558026  
0.44849592 0.160595198  
0.67784805 0.160817441  
0.20629863 0.161291871  
0.42881407 0.161478075  
0.2741998 0.161819119  
0.46597911 0.161935366  
0.39463955 0.162184638  
0.62519913 0.162695919  
0.14050654 0.162978594  
0.29713271 0.164129627  
0.33972996 0.164140537  
0.4393411 0.164305833  
0.33055629 0.164570031  
0.51727537 0.164614593  
0.4992206 0.164742931  
0.59458539 0.164982647  
0.40238048 0.165527547  
0.44225718 0.165541471  
0.31350849 0.165705916  
0.28952997 0.165793399  
0.30848265 0.166007441  
0.68332845 0.166427611  
0.69781634 0.166572272  
0.49530159 0.166632973  
0.24592021 0.16670882  
0.15951987 0.166861267  
0.2938658 0.167015353  
0.35864575 0.167133899

0.29800709 0.167140402  
0.39953385 0.167498905  
0.59341721 0.167838795  
0.67804888 0.168002941  
0.2662012 0.168244646  
0.52000999 0.168258112  
0.42108667 0.168344111  
0.47141505 0.168399665  
0.25645377 0.168498485  
0.32037075 0.168546568  
0.27122817 0.168724388  
0.49547716 0.169167444  
0.26273325 0.169679868  
0.39385065 0.16979828  
0.44464155 0.169984209  
0.31018202 0.170602088  
0.25117488 0.170759694  
0.30543339 0.17127821  
0.64974749 0.171377818  
0.2723684 0.171749223  
0.42691322 0.172268757  
0.49912676 0.172274509  
0.30111112 0.172407007  
0.21199061 0.172457734  
0.28778315 0.172638635  
0.46627765 0.172837121  
0.15386967 0.174441286  
0.29818115 0.175098395  
0.37076548 0.175544884  
0.42108974 0.176428779  
0.28906116 0.176485915  
0.39780669 0.176507851  
0.24090502 0.17697011  
0.4454296 0.177012363  
0.19967555 0.177690422  
0.5161346 0.177825567  
0.18099212 0.178120248  
0.41853705 0.179180487  
0.36681447 0.179378445  
0.38972418 0.179588739  
0.40494954 0.179752697  
0.59749211 0.180410261  
0.23705762 0.180452176  
0.69381869 0.180592701  
0.52379251 0.180967405  
0.28732256 0.181168486

0.31789457 0.181911431  
0.31313696 0.181989175  
0.28327975 0.182233385  
0.597989 0.182664063  
0.43930013 0.182683948  
0.39754284 0.182965711  
0.45319065 0.183050084  
0.20517504 0.183290562  
0.19839193 0.183352298  
0.60716448 0.183430083  
0.3858467 0.183681845  
0.21904152 0.18430097  
0.4258983 0.184397522  
0.53682764 0.185209462  
0.36891615 0.185225832  
0.43823436 0.185251527  
0.62625438 0.185506378  
0.3944765 0.185626899  
0.18297495 0.18570147  
0.57605399 0.185853539  
0.2170828 0.185942993  
0.51590966 0.186182824  
0.57839032 0.186390205  
0.6613584 0.187093769  
0.55884612 0.187168194  
0.2584348 0.188582202  
0.36263468 0.189026248  
0.43771284 0.189594557  
0.49612151 0.189960168  
0.41110122 0.190157305  
0.22553961 0.190221915  
0.61928488 0.190682353  
0.70023421 0.190695142  
0.52003819 0.19245716  
0.5296129 0.192527915  
0.15992589 0.192721527  
0.36065069 0.193074608  
0.22377055 0.193391665  
0.61782262 0.193963247  
0.36798042 0.194084108  
0.21005042 0.194599119  
0.52922918 0.194626672  
0.41777987 0.194966712  
0.47955621 0.195062308  
0.15831498 0.196533422  
0.51427885 0.196842324

0.31137115 0.196846616  
0.33496461 0.19698267  
0.48332709 0.197470526  
0.46281827 0.197471173  
0.46116963 0.197727613  
0.20858633 0.197886611  
0.66024977 0.198821904  
0.23608309 0.198979691  
0.41975734 0.19921568  
0.34239701 0.199609067  
0.34520657 0.200723495  
0.51164186 0.20101317  
0.2938952 0.202209783  
0.29805719 0.202310479  
0.53717359 0.203793046  
0.19596364 0.204211142  
0.39096983 0.204282685  
0.19404779 0.204539723  
0.41030291 0.205613445  
0.41877199 0.205715288  
0.38085223 0.206484445  
0.44787989 0.206672456  
0.46731857 0.208510544  
0.35103731 0.208516012  
0.64863769 0.209844722  
0.34778813 0.210129143  
0.53953674 0.210636557  
0.58100471 0.210881843  
0.35175606 0.211250963  
0.38158426 0.21247666  
0.29859842 0.213907533  
0.66561818 0.214605901  
0.48429481 0.216111742  
0.26923963 0.216923332  
0.32921355 0.217014177  
0.22973914 0.217825755  
0.19780123 0.218695665  
0.17603903 0.219328158  
0.51708727 0.219444805  
0.21903357 0.219675184  
0.29222796 0.220110407  
0.33743491 0.221416429  
0.52098362 0.221706154  
0.18724754 0.222657415  
0.49427409 0.225356193  
0.48741006 0.225998016



0.27143516 0.226399335  
0.22799674 0.226923219  
0.57871681 0.227608882  
0.36678861 0.228109435  
0.18102143 0.228297001  
0.47280221 0.228618387  
0.19330358 0.229461613  
0.59612866 0.229901118  
0.29754086 0.230334604  
0.45936464 0.230529633  
0.44531702 0.230914934  
0.37401132 0.230928639  
0.23139181 0.23099706  
0.3613402 0.23115661  
0.46688833 0.232115408  
0.34368036 0.233548608  
0.30326933 0.233894836  
0.58504753 0.237541754  
0.53195592 0.239744469  
0.47349024 0.240435569  
0.41001482 0.240454786  
0.22103766 0.240688952  
0.39784023 0.241346482  
0.3759295 0.241467053  
0.48712908 0.241633184  
0.15670031 0.241725053  
0.52346582 0.241840905  
0.58873338 0.24188823  
0.26279594 0.242474247  
0.3022057 0.24262723  
0.35955177 0.24268517  
0.50761612 0.242821418  
0.14389954 0.243061386  
0.31243154 0.243117488  
0.19098043 0.24330472  
0.5421175 0.243961607  
0.55485724 0.24513441  
0.52226824 0.245732841  
0.37263807 0.246006637  
0.45158318 0.247356642  
0.22373943 0.248959639  
0.21128179 0.249055717  
0.25412791 0.249621407  
0.54156138 0.252407025  
0.56069152 0.253578734  
0.50451176 0.253690575

0.38343567 0.254361728  
0.43512177 0.25632808  
0.41531557 0.258853188  
0.31538073 0.260850623  
0.32949851 0.261241995  
0.29418313 0.262794656  
0.42942119 0.263013019  
0.22159411 0.263088241  
0.28383958 0.266118186  
0.43161288 0.266409525  
0.14459386 0.267846664  
0.43346171 0.268939526  
0.22477821 0.269160351  
0.43503939 0.271603736  
0.36588225 0.271621242  
0.18530175 0.278495826  
0.40411452 0.279376491  
0.37156189 0.280030152  
0.21112098 0.282501856  
0.26699988 0.282869849  
0.40129354 0.284467302  
0.46331767 0.288801052  
0.26181956 0.292875531  
0.5032755 0.292906668  
0.21754812 0.293587189  
0.43427457 0.296427651  
0.26033586 0.297011251  
0.36579456 0.297129219  
0.26692402 0.299663382  
0.48760186 0.307077663  
0.19150827 0.307106795  
0.36483819 0.308109655  
0.20327612 0.308709372  
0.31817883 0.310235894  
0.19383453 0.311224629  
0.32338625 0.311512771  
0.20615151 0.312652761  
0.50737316 0.315122175  
0.19579298 0.315255405  
0.33652513 0.315364936  
0.44036857 0.31618279  
0.4910962 0.328002787  
0.27758676 0.339160419  
0.22277354 0.339191709  
0.41773402 0.339199893  
0.41637075 0.34302873

|            |             |
|------------|-------------|
| 0.44266729 | 0.349469315 |
| 0.27537603 | 0.359544314 |
| 0.33124073 | 0.365334159 |
| 0.22161793 | 0.36668704  |
| 0.28311187 | 0.369692828 |
| 0.32591383 | 0.37459741  |
| 0.31241005 | 0.381097294 |
| 0.27130143 | 0.390579575 |
| 0.25732049 | 0.393796288 |
| 0.31420825 | 0.415721173 |
| 0.34697816 | 0.4157896   |
| 0.26238886 | 0.419051722 |
